# Supplementary material for: Digital expression profiling of the compartmentalized translatome of Purkinje neurons
Source: HighWire-hosted journal article supplement (doi:10.1101/gr.164095.113), 2014-06-05
Supplement: Supplemental_Table.S1.xlsx [file Supplemental_Table.S1.xlsx]

## Sheet: Table S1
name	lane	barcode	compartment	capture	cellular fraction	replicate	lobules	RNA	RIN
Assessment of ribosome capture
41_Ctrl_60_MB_02	NChi10034	ACAGAT	M	Bound	whole	9	55	128	NA
43_Ctrl_60_MUB_02	NChi10034	CACGAT	M	Unbound	whole	9	55	3717	NA
45_Ctrl_60_cyt_02	NChi10034	CTGACG	C	Bound	whole	9	55	483	NA
47_Ctrl_60_cytUB_02	NChi10034	GTATAC	C	Unbound	whole	9	55	3322	NA
29_Ctrl_60_cyt_03	NChi10053	CTGACG	C	Bound	whole	7	63	210.67	5.6
30_Ctrl_60_MB_03	NChi10053	GAGTGA	M	Bound	whole	7	63	175.64	3.3
33_Ctrl_60_cytUB_01	NChiPOOLGGG	ACAGAT	C	Unbound	whole	8	54	NA	NA
35_Ctrl_60_MUB_01	NChiPOOLGGG	CACGAT	M	Unbound	whole	8	54	NA	NA
37_Ctrl_60_cyt_01	NChiPOOLGGG	CTGACG	C	Bound	whole	8	54	NA	NA
39_Ctrl_60_MB_01	NChiPOOLGGG	GTATAC	M	Bound	whole	8	54	NA	NA
Comparison between sub-cellular fractions											average	SEM
13_Ctrl_5_cyt_02	NChi10050	CTGACG	C	Bound	whole	3	50	156.29	5.9	Cyt	260.678	51.0427
14_Ctrl_5_MB_02	NChi10050	GAGTGA	M	Bound	whole	3	50	155.63	3.3	Mb	187.613	29.0499
01_Ctrl_5_cyt_01	NChi10051	ACAGAT	C	Bound	whole	1	57	69.51	6.2
02_Ctrl_5_MB_01	NChi10051	ATCGTG	M	Bound	whole	1	57	85.92	3.2
17_Ctrl_5_cyt_03	NChi10052	ACAGAT	C	Bound	whole	4	45	169.88	6.7
18_Ctrl_5_MB_03	NChi10052	ATCGTG	M	Bound	whole	4	45	118.29	4.3
05_Ctrl_15_cyt_01	NChi10051	CTGACG	C	Bound	whole	2	64	212.53	5.3
06_Ctrl_15_MB_01	NChi10051	GAGTGA	M	Bound	whole	2	64	243.5	3.2
21_Ctrl_15_cyt_02	NChi10052	CTGACG	C	Bound	whole	5	51	363.51	5.6
22_Ctrl_15_MB_02	NChi10052	GAGTGA	M	Bound	whole	5	51	283.65	3
25_Ctrl_15_cyt_03	NChi10053	ACAGAT	C	Bound	whole	6	64	420.03	5.1
26_Ctrl_15_MB_03	NChi10053	ATCGTG	M	Bound	whole	6	64	310.27	3
Dendrite libraries
11_Ctrl_0_dend_cyt_01	NChi10050	CACGAT	C	Bound	dendrite	10	80	2.05	8.4
12_Ctrl_0_dend_MB_01	NChi10050	CACTGA	M	Bound	dendrite	11	80	7.89	5
name	extracted pairs	artifacts removed	ribosome map count	reads aligned	proper pairs	unique pairs	5′ UTR exon	coding exon	intron	3′ UTR exon	intergenic	median insert size
Assessment of ribosome capture
41_Ctrl_60_MB_02	5834736	501145	3224816	1850689	1206564	301212	30053	275692	67425	41942	73885	288
43_Ctrl_60_MUB_02	11166898	75083	3726325	7176545	4789189	1.38085e+06	153151	834458	454244	157151	402856	228
45_Ctrl_60_cyt_02	10831807	197308	5563891	4640764	2909531	831573	127690	722338	149641	71358	212665	482
47_Ctrl_60_cytUB_02	30102919	227100	10457764	18870018	13383700	3987504	258040	1515698	2159005	326093	1587199	264
29_Ctrl_60_cyt_03	9607840	272182	4976847	4047243	2777165	1064361	217595	778794	161192	75453	330315	923
30_Ctrl_60_MB_03	10204154	661467	6375559	2745207	1882984	763574	97586	731236	117388	95946	194436	346
33_Ctrl_60_cytUB_01	4517028	179829	1215133	3075449	2199083	1261003	87600	481792	772229	115974	430001	252
35_Ctrl_60_MUB_01	2985160	96949	440422	2426839	1532705	518592	65258	276985	204995	53142	135664	181
37_Ctrl_60_cyt_01	15545827	501935	7560915	6876614	4523183	1336402	152898	980972	358292	153947	395667	393
39_Ctrl_60_MB_01	13013014	1277718	6595527	4596276	3088374	776615	65552	646844	168851	121416	219328	224
Comparison between sub-cellular fractions
13_Ctrl_5_cyt_02	7945865	362239	3548076	3761526	2638880	1159698	203976	883814	184631	105864	344588	854
14_Ctrl_5_MB_02	9218048	960761	5136271	2612088	1846408	803429	91360	737227	150777	109537	205121	321
01_Ctrl_5_cyt_01	8678431	1110804	3139146	4189550	2934906	755984	139913	538575	115687	66673	240134	735
02_Ctrl_5_MB_01	11156511	1477321	6380760	2764362	1917705	681072	79789	638959	96157	94969	177815	272
17_Ctrl_5_cyt_03	11748763	1761766	4361581	5390399	3860199	1717950	276349	976367	326019	212858	654889	594
18_Ctrl_5_MB_03	12312452	3654032	4167382	4184880	3038739	1121566	119279	805221	182982	195195	390136	280
05_Ctrl_15_cyt_01	10127842	270541	5181847	4302644	3010139	1335766	229277	1043373	189736	134534	387873	719
06_Ctrl_15_MB_01	11976701	425062	7990115	2822894	1962924	1138289	124679	1107972	159998	166376	277835	301
21_Ctrl_15_cyt_02	9906754	358825	4216466	5041998	3619341	1853803	286283	1164390	336996	230115	661001	676
22_Ctrl_15_MB_02	13056264	469721	7498271	4533341	3358017	1906560	164125	1388102	359085	352278	634385	298
25_Ctrl_15_cyt_03	11471241	443139	5681393	4968002	3399263	1630395	307200	1193796	264707	139046	506127	771
26_Ctrl_15_MB_03	13409724	1159163	7956982	3797913	2565834	1296704	159663	1200063	218118	165170	334493	261
Dendrite libraries
11_Ctrl_0_dend_cyt_01	1989756	1439336	158004	347802	222665	23335	4937	11508	4062	2096	9578	913
12_Ctrl_0_dend_MB_01	4654377	2180320	1100531	1251534	877028	94686	12860	68141	15919	14305	33339	410
