# Supplementary material for: Digital expression profiling of the compartmentalized translatome of Purkinje neurons
Source: HighWire-hosted journal article supplement (doi:10.1101/gr.164095.113), 2014-06-05
Supplement: Supplemental_Table.S2.xlsx [file Supplemental_Table.S2.xlsx]

## Sheet: Table S2
id	logFC.pulldown	logCPM.pulldown	FDR.pulldown	Symbol
chr19_53844971_53844980_+	5.186513351	5.238187524	1.68E-07	Gas8
chr11_63814441_63814541_+	3.951390405	6.767076561	2.10E-07	Arhgap31
chr5_30455643_30455649_+	5.434568259	7.934729236	4.03E-07	Calb1
chr4_87255911_87256011_+	4.070636613	6.356607555	7.89E-07	Pigy
chr5_30470441_30470467_+	3.131006117	7.09460482	8.27E-07	Calb1
chr4_143858432_143858503_+	3.230498082	7.64890144	1.41E-06	Itpr1
chr6_132783334_132783406_+	3.377568532	6.949393209	1.46E-06	Eml1
chr1_207318189_207318190_+	3.167633995	6.569777275	1.70E-06	Sptbn2
chr16_19620292_19620380_-	4.484772024	5.975887965	1.70E-06	Homer3
chr17_10808950_10808968_+	4.501071044	6.607566937	1.70E-06	Isca1
chr4_143888472_143888559_+	3.520773736	6.579926616	1.81E-06	Itpr1
chr5_30475765_30475776_+	3.442129634	5.840288151	1.86E-06	Calb1
chr7_55495118_55495207_+	3.059481868	6.286570378	2.31E-06	Ptprr
chr1_201557961_201558039_+	3.441756756	6.611253963	2.49E-06	Eps8l2
chr1_41870307_41870335_-	4.387247893	6.521057745	2.87E-06	Sod2
chr3_76314086_76314168_-	3.198855123	6.126236389	2.94E-06	Dgkz
chr12_2529701_2529704_+	2.874530679	6.625265577	3.38E-06	Pcp2
chr5_30475602_30475631_+	2.824535247	7.395961185	3.40E-06	Calb1
chr12_36225064_36225120_+	3.13763698	6.909154465	3.96E-06	Erp29
chr13_68741756_68741798_+	3.43482955	6.226772374	5.09E-06	Rgs8
chr4_143874217_143874276_+	3.001644587	7.497538438	5.19E-06	Itpr1
chr4_143874905_143874931_+	2.773388842	7.00190121	5.68E-06	Itpr1
chr7_116127544_116127546_-	3.447175065	5.892188616	5.77E-06	Pvalb
chr3_56186668_56186739_-	2.942569913	7.282120604	5.88E-06	Chn1
chr1_64170848_64170901_-	4.47514246	5.193521618	9.10E-06	Prkcg
chr18_28596134_28596184_+	4.382854503	6.760130867	1.18E-05	Psd2
chr4_56810118_56810130_+	3.335283277	5.867776134	1.23E-05	Fam40b
chr1_199188181_199188259_+	3.6660079	5.546710556	1.29E-05	Inpp5a
chr4_143831344_143831402_+	2.622568649	7.475852728	1.32E-05	Itpr1
chr19_41669225_41669296_-	3.531821963	6.735723192	1.35E-05	Bcar1
chr6_42783324_42783325_-	3.510894116	6.554235712	1.35E-05	Id2
chr14_7175956_7176013_-	3.398298603	5.945580311	1.81E-05	Aff1
chr1_148524251_148524263_+	3.080217352	6.831995363	1.88E-05	Dlg2
chr5_144084011_144084098_+	2.897977438	6.44269412	1.97E-05	Inpp5b
chr13_80234541_80234548_-	4.982130925	6.441506796	2.17E-05	Atp1b1
chr5_30478804_30478850_+	2.738671698	8.287856819	2.33E-05	Calb1
chr1_207332881_207332967_+	2.594152049	7.15120529	2.35E-05	Sptbn2
chr1_253228559_253228626_+	3.503808468	5.979266433	2.38E-05	Gsto1
chr15_45791977_45792048_+	3.079259112	6.242295937	2.62E-05	Stmn4
chr5_63262067_63262151_-	3.141428443	5.908676189	2.62E-05	Gabbr2
chr1_64162841_64162923_-	2.762113924	6.578366776	2.86E-05	Prkcg
chr19_9818924_9819016_-	2.733175094	6.80898985	2.90E-05	Ndrg4
chr3_105668398_105668415_-	3.024448331	6.36376834	2.98E-05	Fam82a2
chr8_125499371_125499376_+	5.178786508	4.37863496	3.08E-05	Eif1b
chr3_105671791_105671854_-	3.303782176	7.612999978	3.15E-05	Fam82a2
chr13_68735138_68735174_+	2.506834658	7.140648999	3.34E-05	Rgs8
chr1_178003983_178004018_-	3.99759958	6.700062154	3.48E-05	Thumpd1
chr8_85374867_85374913_-	2.629343807	6.272179092	3.57E-05	Impg1
chr2_250793589_250793630_-	5.723659968	4.699911819	3.64E-05	Nexn
chr5_75745298_75745301_+	5.240672973	4.460941879	3.64E-05	Akap2
chr4_143899570_143899653_+	2.596659286	8.194404332	3.72E-05	Itpr1
chr8_113706011_113706070_-	5.751221966	6.131693168	4.25E-05	Arih2
chr6_94682052_94682060_-	3.481065058	6.10515883	4.43E-05	Rtn1
chr20_1577887_1577888_-	3.435226348	4.775065594	4.64E-05	Gabbr1
chr11_28106769_28106788_-	3.321614663	5.376131342	5.02E-05	Grik1
chr13_68724184_68724195_+	2.662627937	7.222607518	5.04E-05	Rgs8
chr1_27539665_27539752_+	2.797896995	6.284856317	5.09E-05	Ncoa7
chr13_68724170_68724172_+	8.454531032	4.077442329	5.32E-05	Rgs8
chr5_30473690_30473740_+	2.709134325	7.462648473	5.37E-05	Calb1
chr14_77946507_77946588_+	2.446996191	7.11456882	5.60E-05	Nsg1
chr10_59879036_59879134_+	5.48562579	4.732832319	5.61E-05	Atp2a3
chr10_72794453_72794467_-	3.293904735	7.526330444	6.38E-05	Aatf
chr4_143881422_143881519_+	2.481097447	8.119214334	6.44E-05	Itpr1
chr4_143893097_143893196_+	2.938402977	6.876228504	6.96E-05	Itpr1
chr7_24531662_24531680_+	7.301165481	3.242601867	7.10E-05	Igf1
chr18_56879135_56879143_+	2.942224357	6.186466789	7.13E-05	Camk2a
chr9_91689600_91689670_-	5.377097494	5.663604877	7.20E-05	Ndufa10
chr5_59522073_59522102_-	5.09702632	4.441760544	7.39E-05	Stoml2
chr17_85654872_85654883_-	4.736574438	5.412951558	7.56E-05	Fam107b
chr13_68740765_68740847_+	2.852895973	6.649543226	7.64E-05	Rgs8
chr10_61870705_61870767_-	3.479355169	5.282974187	8.22E-05	Garnl4
chr14_105005287_105005383_+	3.265237778	5.338794131	8.32E-05	Bcl11a
chr1_94826265_94826355_+	2.962214629	6.181349278	8.63E-05	Shank1
chr1_148900197_148900238_+	4.156834928	4.325484468	8.64E-05	Dlg2
chr4_143913667_143913693_+	2.809713293	6.183629752	8.93E-05	Itpr1
chr10_72806484_72806560_-	3.685522783	8.330050125	9.19E-05	Lhx1
chr6_104471799_104471847_+	2.847447076	6.355158857	9.89E-05	Plekhd1
chr14_77935554_77935648_+	2.500821092	6.368031836	9.95E-05	Nsg1
chr4_122612187_122612193_-	4.244545876	4.403616055	9.95E-05	Sec61a1
chr12_2529950_2529952_+	2.567229768	6.543137401	0.000100441	Pcp2
chr1_8168135_8168232_-	3.539877951	6.303097408	0.000100866	Phactr2
chr1_235765559_235765561_-	8.354756316	4.05380588	0.000103884	Prkg1
chr1_179815997_179816081_-	2.739925285	5.719574955	0.000105183	Cdr2
chr4_152343657_152343661_+	2.9954215	6.592169365	0.000111084	Fam21c
chr7_27840387_27840468_+	2.78246172	5.830876677	0.000111224	Anks1b
chr10_82588137_82588197_-	3.126393665	7.058184043	0.000121054	Nme2
chr2_127698777_127698834_+	3.084394074	6.558769856	0.000121169	Hspa4l
chr18_28610865_28610934_+	2.726121018	6.836133246	0.000121794	Psd2
chr7_138395593_138395656_-	3.978860861	4.725508629	0.00012666	Racgap1
chr10_56624233_56624287_-	3.668029989	5.144552785	0.000127246	Fgf11
chrX_123585775_123585777_+	3.271678411	5.580976974	0.000127246	Ngfrap1
chr4_165818026_165818091_+	3.328881396	4.921000899	0.000130023	BC098849
chr10_89627388_89627461_-	2.841767427	6.318103318	0.000135359	Zfp385c
chr1_265329516_265329606_-	3.546876321	5.014644117	0.000135359	Hspa12a
chr1_94823413_94823467_+	3.414955525	4.854505449	0.000135816	Shank1
chr4_143979480_143979572_+	2.766309344	6.200786505	0.000135835	Itpr1
chr1_158140509_158140510_+	3.536974844	4.884406545	0.000138507	Fam168a
chr1_250054534_250054622_+	2.888518806	5.953042316	0.000138943	Sema4g
chr4_152375811_152375869_+	2.508984561	6.00502691	0.000138943	Fam21c
chr2_154668988_154669022_+	2.89422729	5.92007901	0.000140791	Kcnab1
chr4_84852003_84852079_+	2.545139394	8.238687081	0.000143793	Ppp1r17
chr8_31584772_31584794_-	5.178460651	4.095249431	0.000143839	Barx2-ps1
chr1_5744579_5744652_-	2.441443633	7.506955499	0.000145119	Grm1
chr8_47030160_47030192_+	2.478024989	8.060586202	0.000145119	Thy1
chr6_76177579_76177593_+	3.664394454	5.690115203	0.000147072	Brms1l
chr11_83403436_83403515_-	4.952617345	3.934120269	0.000152878	B3gnt5
chr1_148690324_148690424_+	2.53439521	8.58532127	0.000154332	Dlg2
chr1_207355089_207355139_+	2.328128189	7.578981889	0.000154441	Sptbn2
chr1_180921711_180921746_-	3.85233684	7.403666828	0.0001556	Ndufab1
chr3_59904415_59904487_-	2.930827981	5.978376915	0.0001556	Sestd1
chr4_143876495_143876496_+	3.498982784	5.012860133	0.000160551	Itpr1
chr9_110314906_110315002_+	4.356762519	4.498040734	0.000160867	Myom1
chr1_64147758_64147824_-	3.304759149	7.213689162	0.000170718	Prkcg
chr4_143952704_143952705_+	2.844921039	5.344662198	0.000180081	Itpr1
chr3_155507614_155507648_+	2.851571417	6.692307747	0.000191082	Dbndd2
chr10_63804852_63804909_+	3.876803274	5.305762291	0.00019907	Myo18a
chr1_94833064_94833066_+	2.68784425	5.856148678	0.000203038	Shank1
chr3_123704132_123704201_+	4.04187264	4.833919564	0.000203038	Plcb4
chr9_35641934_35642004_-	4.062509954	5.305953916	0.000203782	Actr1b
chr14_10861033_10861038_+	3.847348485	4.985368986	0.000207639	Hnrpdl
chr14_83456073_83456077_-	3.007331166	4.984090095	0.000208437	Ywhah
chr8_113955884_113955967_+	3.213922425	7.688589831	0.000212441	Uqcrc1
chr12_42530080_42530108_+	3.342922297	7.304838711	0.000218218	Cox6a1
chr20_11872434_11872526_+	2.723019161	6.794221395	0.000219158	Col18a1
chr5_30456334_30456381_+	2.560675025	8.105465381	0.000219395	Calb1
chr1_148619422_148619448_+	2.390083443	6.822731528	0.000219941	Dlg2
chr19_53833909_53833998_-	3.0335807	6.34098366	0.000219941	Dbndd1
chr11_68377919_68378002_+	4.134854575	4.418534919	0.000223535	Kalrn
chr2_140456585_140456586_-	4.87351566	4.038216629	0.000223535	Setd7
chr4_143969093_143969187_+	2.677929518	8.771301391	0.000223535	Itpr1
chr4_48676190_48676289_-	3.892857289	5.648239256	0.000223535	Fam3c
chr6_3206981_3206987_+	2.453500592	8.427158482	0.000223535	RGD1560224
chr5_30475949_30475978_+	2.517426245	8.229585153	0.000235901	Calb1
chr10_86552565_86552571_+	3.517852983	4.682660161	0.000241699	Lasp1
chr9_73878443_73878510_+	4.941720693	3.915029396	0.000245706	Plcd4
chr9_74518077_74518149_+	2.409429576	6.554154726	0.000245761	Dnajb2
chr3_98089769_98089833_+	2.71587352	6.501038822	0.000250296	Lpcat4
chr10_43609496_43609584_+	3.132852537	6.167181142	0.000255947	Larp1
chr1_148545485_148545516_+	2.638637204	5.659128712	0.000264003	Dlg2
chr4_143835952_143836024_+	2.516543596	7.551510231	0.000267052	Itpr1
chr7_27859778_27859821_+	3.135633925	4.806953466	0.000269308	Anks1b
chr1_94832240_94832308_+	3.129538598	5.546428057	0.000270456	Shank1
chr3_149485382_149485458_+	2.760661105	5.939830795	0.000276578	Ppp1r16b
chr10_46293151_46293155_-	2.806828586	5.890874014	0.000282012	Rasd1
chr5_21996500_21996521_-	2.566589337	5.687533349	0.00028514	Car8
chr3_116813127_116813132_+	2.832629361	5.29002878	0.000286109	Slc20a1
chr2_163712985_163713028_-	2.993525857	4.922924318	0.000288535	.
chr4_152367723_152367753_+	3.028085675	5.313187204	0.000288535	Fam21c
chr3_59885209_59885212_-	3.723611736	5.149172585	0.000291763	Sestd1
chr8_112643501_112643590_+	3.289311981	4.562734425	0.00029273	Cacna2d2
chr12_43747182_43747265_+	3.392543557	5.789795469	0.000296205	Coro1c
chr10_59863213_59863286_+	2.844613314	6.913920574	0.000296983	Atp2a3
chr19_374986_375085_-	2.880565586	7.22804484	0.000299549	Car7
chr1_94832897_94832983_-	2.732368268	6.322761455	0.000302714	.
chr20_11691829_11691871_+	3.097005916	7.817390524	0.000307936	Adarb1
chrX_56689292_56689365_-	3.549449284	8.223830928	0.000317272	Map7d2
chr4_143997649_143997714_+	2.233423592	7.526223842	0.000318355	Itpr1
chr1_64148350_64148403_-	2.851831407	5.652176612	0.000324334	Prkcg
chr9_83744339_83744427_-	2.597227278	6.031329421	0.000331635	Dner
chr4_185678061_185678068_+	2.42976959	8.225463831	0.000332147	Far2
chr7_27584795_27584869_+	2.895453312	5.431309176	0.000334788	Anks1b
chr7_55588358_55588440_+	2.903741305	4.894513126	0.000342644	Ptprr
chr19_24872593_24872684_+	3.330344646	5.815188433	0.000346445	MAST1
chr11_84365170_84365229_+	2.545664545	6.245689192	0.000347078	Sept5
chr8_62389997_62390005_+	8.004363854	3.858108667	0.000350798	Nptn
chr2_197234451_197234522_+	3.265658913	4.901576026	0.000355377	Casq2
chr19_367758_367802_-	3.769134018	4.503948188	0.000356807	Car7
chr1_199300440_199300516_+	2.42473292	5.994120392	0.00035719	Inpp5a
chr13_68732677_68732732_+	2.601126198	5.295785483	0.000360535	Rgs8
chr20_8881259_8881351_-	4.736865933	4.530746292	0.000360535	Btbd9
chr9_78768008_78768083_-	2.128179472	7.009134339	0.000360535	Scg2
chr1_207353340_207353401_+	3.119819408	7.18883353	0.000371597	Sptbn2
chr3_9008354_9008434_+	2.156192633	6.896609856	0.000373621	Sptan1
chr5_21997475_21997517_-	2.292548715	7.099946712	0.000375816	Car8
chr7_95934137_95934215_+	2.188716967	6.755858522	0.000376745	Mtss1
chr1_207345615_207345617_+	2.430998555	6.2177278	0.000396345	Sptbn2
chr3_123706357_123706363_+	3.104099506	6.261159414	0.000402871	Plcb4
chr1_207350499_207350512_+	1.999554365	6.918526463	0.000429224	Sptbn2
chr18_71097957_71097984_+	4.351159261	4.246498341	0.000429224	Ccdc11
chr1_204603480_204603577_+	4.774548609	4.296135339	0.00043825	Shank2
chr20_10851534_10851578_+	8.0895568	3.780223509	0.000442255	RGD1303003
chr4_143706359_143706394_+	2.08911906	6.769704729	0.000446864	Itpr1
chr1_64144779_64144823_-	3.556252182	4.336773848	0.000449027	Cacng7
chr1_149127229_149127314_+	2.720388087	6.162869964	0.000457669	Dlg2
chr5_169516682_169516719_-	2.932591696	6.661080289	0.000474948	Hes3
chr13_80234582_80234583_-	7.590427052	5.012576288	0.0004791	Atp1b1
chr6_104471531_104471594_+	2.572070129	6.755955246	0.000482466	Plekhd1
chr7_37714132_37714136_+	2.260041331	7.359837182	0.000514883	Kitlg
chr4_94053363_94053365_+	7.285287684	3.354990037	0.000521719	Grid2
chr1_149259108_149259134_+	2.647918482	5.257552038	0.000522333	Dlg2
chr2_197236879_197236924_+	2.752379324	5.533508012	0.00053852	Casq2
chr4_143837783_143837838_+	2.286549337	7.89740964	0.000538868	Itpr1
chr7_95915090_95915145_+	2.328387511	5.803042066	0.000555275	Mtss1
chr10_87124376_87124428_+	2.979872987	5.978213216	0.000577767	Ppp1r1b
chr1_80282047_80282119_-	2.434766669	7.557000555	0.000584437	Atp1a3
chr12_11537042_11537111_-	8.136803731	3.53786051	0.000584457	Grid2ip
chr2_33867525_33867541_-	8.239884865	3.84221469	0.000597515	Mast4
chr3_154925981_154926037_+	3.096431169	7.082908461	0.000618472	Ywhab
chr6_128871531_128871541_-	8.25732182	3.51966079	0.000627968	Clmn
chr8_57449751_57449846_-	2.430943057	6.394871775	0.000634803	Elmod1
chr18_63641556_63641600_+	2.931613158	4.943055752	0.000635257	Gnal
chr12_2530100_2530101_+	3.183302848	4.520303366	0.00064575	Pcp2
chr7_72306215_72306217_-	8.012486442	3.697822637	0.000651456	YWHAZ
chr10_83112707_83112766_-	2.767413303	5.487784541	0.000654389	Cacna1g
chr4_143876447_143876449_+	2.611023181	5.976386332	0.000659836	Itpr1
chr1_64153081_64153111_-	2.832552549	4.904021794	0.000670156	Prkcg
chr10_83044553_83044556_-	2.926425788	5.62929804	0.000691633	Cacna1g
chr18_32050107_32050144_+	2.13166537	6.276252809	0.000691992	Arhgap26
chr9_36344881_36344976_+	3.385661655	4.497122433	0.000701815	Inpp4a
chr2_40819093_40819095_+	2.870480664	5.057700075	0.00070797	Pde4d
chr10_59869404_59869498_+	2.560230499	7.165715892	0.00072684	Atp2a3
chr3_8985838_8985885_+	2.839247743	5.521984151	0.00072684	Sptan1
chr4_152361102_152361168_+	2.48746404	7.519609479	0.00072684	Fam21c
chr3_156006281_156006288_+	2.484623282	5.861163566	0.000730103	Slc12a5
chr1_207341277_207341279_+	3.976564545	4.212016573	0.000730604	Sptbn2
chr10_14987783_14987881_+	2.087854844	6.294574441	0.000736364	Gng13
chr7_55480605_55480684_+	2.271834837	8.980644844	0.000736364	Ptprr
chr15_45730490_45730503_+	3.285190543	4.439521934	0.000747202	Trim35
chr4_143820854_143820943_+	2.25116545	8.329518512	0.000747202	Itpr1
chr4_160665262_160665265_-	2.356432331	5.366775578	0.00075191	Clstn3
chr14_66908334_66908348_+	3.445168159	4.644253962	0.000768438	Kcnip4
chr6_104483014_104483083_+	2.532558953	6.422121501	0.000768438	Plekhd1
chr8_48957114_48957115_-	2.984247468	5.335290137	0.000772558	Pafah1b2
chr10_89574492_89574494_-	2.964085603	5.046206912	0.000786407	Zfp385c
chr15_59760333_59760429_-	4.112532455	4.345588956	0.000786407	Dgkh
chr10_86720909_86720997_-	3.086397851	4.81630528	0.000803433	Plxdc1
chr1_64172561_64172563_+	6.044411083	3.334094627	0.000835441	.
chr4_143845362_143845433_+	2.308044871	7.795283017	0.000869958	Itpr1
chr1_94823751_94823839_+	2.290693429	5.783023816	0.000869986	Shank1
chr10_89577807_89577886_-	3.179757415	5.792529456	0.000874277	Zfp385c
chr3_34193145_34193230_-	2.547278022	7.583018154	0.000875189	Cacnb4
chr16_87961105_87961135_-	2.950675534	4.941667678	0.000912404	LOC685778
chr4_79789484_79789580_+	3.276786637	5.62043843	0.000912404	Snx10
chr7_55504189_55504273_+	2.085499233	6.617780091	0.000912404	Ptprr
chr5_135348872_135348896_-	2.71786641	6.849683112	0.000922138	Cmpk1
chr6_136773467_136773546_-	2.384332385	6.373093959	0.000932116	RGD1305627
chr14_83457675_83457676_-	4.654762491	4.856890866	0.000940803	Ywhah
chr7_116126011_116126014_-	2.12850157	6.189152103	0.000951592	Pvalb
chr7_117385154_117385230_-	2.659520249	5.854386729	0.000951592	Tmem184b
chr6_3212903_3212953_+	2.086871623	7.144966278	0.000959882	RGD1560224
chr9_36301845_36301881_+	2.807220032	4.587791743	0.000961326	Inpp4a
chr7_95945295_95945297_+	3.216866804	4.306875013	0.000981246	Mtss1
chr7_1376550_1376627_+	3.057465528	7.622814198	0.000990806	Atp5b
chr1_212788333_212788356_-	2.263044502	6.212600463	0.000996603	Dagla
chr18_73825593_73825602_+	2.71820742	4.820730162	0.000999378	Skor2-ps1
chr8_86702212_86702266_-	2.411113349	6.790191918	0.001007229	Htr1b
chr4_152372989_152373088_+	2.259063246	6.710719733	0.0010498	Fam21c
chr7_12466045_12466064_-	3.561626316	5.104696215	0.001064246	Slc1a6
chr8_112669261_112669321_+	2.076737589	6.766863857	0.001083352	Cacna2d2
chr6_26365865_26365914_+	2.055839851	7.018577562	0.00109855	Kif3c
chrX_12921564_12921589_-	2.825129593	5.238396206	0.001108437	Cdk16
chr14_77952521_77952523_+	2.758580205	5.0023901	0.001116285	Nsg1
chr4_143887450_143887543_+	1.952627044	6.900227141	0.001121471	Itpr1
chr3_4560942_4560964_+	4.619889147	4.617227491	0.001129505	Pmpca
chr9_62224045_62224135_+	1.878607904	7.127991336	0.001129505	Adam23
chr20_1554296_1554300_-	3.485761348	5.125282812	0.001141496	Gabbr1
chr7_142224298_142224359_-	8.051647555	3.57313106	0.001167459	Zfp385a
chr10_59871278_59871280_+	2.641850037	5.951323209	0.001177575	Atp2a3
chr14_77931903_77931948_+	3.169057482	7.669341303	0.001189677	Nsg1
chr4_143877373_143877411_+	2.293293082	8.206796891	0.00121243	Itpr1
chr8_44970977_44970989_-	4.658345358	3.616155661	0.001220139	Sorl1
chr19_14554779_14554809_-	3.375802827	4.424888752	0.001253866	Sez6l
chr3_149487260_149487356_+	2.422492812	6.75990301	0.001259583	Ppp1r16b
chr12_35266570_35266605_+	4.554688189	4.275227742	0.001280724	Atp2a2
chr1_207112797_207112885_+	2.774038809	5.808835077	0.001285841	Pc
chr9_110309838_110309914_+	4.052268319	4.220589142	0.001285841	Myom1
chr7_12952635_12952639_-	4.71522447	3.572303697	0.001287343	Wiz
chr4_75385625_75385717_+	1.998334886	7.109309485	0.001307198	LOC100364190
chr6_104472623_104472683_+	1.892733076	7.243929454	0.001315973	Plekhd1
chr7_95916533_95916595_+	2.366148478	5.917853184	0.001352685	Mtss1
chrX_55580900_55580904_-	4.904854426	3.967576128	0.001366237	Phka2
chr1_265316036_265316115_-	2.91115088	4.672628732	0.001369962	Hspa12a
chr2_154668855_154668857_+	3.48816998	4.372790345	0.001370746	Kcnab1
chr3_105660670_105660671_-	7.961740889	3.407447439	0.001370746	Fam82a2
chr7_54876921_54876947_-	8.05943574	3.485217661	0.001370746	Lgr5
chr19_53841136_53841196_+	3.197905561	4.576662683	0.001402009	Gas8
chr3_123968656_123968687_+	2.869402633	4.797183924	0.001402009	Plcb4
chr14_85601710_85601713_-	3.217589276	4.434263469	0.001415828	Nefh
chr4_149764120_149764122_-	2.57886227	4.761148641	0.001417478	Atp2b2
chr5_30459924_30459970_+	2.330843795	7.753296046	0.001417478	Calb1
chr2_197203542_197203599_+	2.728138837	5.384804308	0.001433341	Casq2
chr7_95935714_95935781_+	2.570471431	5.576320422	0.001442073	Mtss1
chr7_12395120_12395123_-	4.867686975	4.042132647	0.00144559	Slc1a6
chr10_40873194_40873262_-	2.700115705	5.178234318	0.00147475	Atox1
chr19_39616761_39616821_-	8.461198149	3.78702705	0.00150502	Atxn1l
chr13_107827415_107827483_+	2.143885618	5.84475368	0.001545993	Lpgat1
chr7_55575913_55575959_+	7.441908377	3.276424524	0.001545993	Ptprr
chr7_95940920_95941008_+	4.873302526	4.034658604	0.001546498	Mtss1
chr3_44092364_44092422_+	1.881679331	6.794406255	0.001574883	Slc4a10
chr7_116124576_116124654_-	2.478937373	8.206558049	0.001581907	Pvalb
chr5_63306170_63306251_-	2.808980623	5.174291205	0.001587862	Gabbr2
chr2_173735281_173735310_-	3.725761403	4.851887706	0.001592164	Gucy1b3
chr1_212913302_212913314_+	3.609151528	4.383767715	0.001593922	Syt7
chr1_87421514_87421570_+	2.757170425	5.310997386	0.001598206	Pepd
chr1_64153224_64153287_-	2.049175516	7.279917121	0.001600995	Prkcg
chr12_34850470_34850487_+	2.406710504	6.65558143	0.00160186	Anapc5
chr9_52596736_52596738_-	2.354607955	4.788801957	0.001614593	Stk17b
chr1_207332425_207332479_+	3.086591854	5.011328001	0.001621807	Sptbn2
chr8_46788568_46788639_+	8.046657917	3.418988741	0.001633211	Pvrl1
chr9_42194751_42194783_-	3.920420292	4.202102686	0.001674122	Arpc5l2
chr1_207344658_207344669_+	3.706197379	3.938366686	0.001675765	Sptbn2
chr9_10520713_10520730_+	7.29811032	4.688441817	0.001692627	Vegfa
chr10_59867761_59867821_+	2.304247381	6.060569948	0.001708919	Atp2a3
chr16_19626932_19626935_-	4.156625713	5.693073883	0.001734975	Homer3
chr9_62220306_62220344_+	2.201254897	6.105057581	0.001734975	Adam23
chr3_76320681_76320765_-	2.334435556	5.524781382	0.001752516	Dgkz
chr1_167658294_167658384_+	3.138350882	4.650889311	0.001783107	Ipo7
chr16_19619543_19619544_-	4.494082299	3.775448736	0.001786964	Homer3
chr10_64312383_64312412_-	2.478983161	9.327978634	0.001791572	Aldoc
chr15_937388_937479_+	1.972016018	6.527030687	0.00179448	Kcnma1
chr10_59868001_59868075_+	2.425750898	6.335187207	0.001798941	Atp2a3
chr12_11534044_11534114_-	3.519733002	4.266283639	0.001830129	Grid2ip
chr6_73127905_73127998_+	2.827331519	4.703292799	0.001830129	Akap6
chr13_68738335_68738406_+	2.768609823	5.535643064	0.001850781	Rgs8
chr19_311963_312043_-	2.286974973	6.775834646	0.001870848	Pdp2
chr4_152343620_152343623_+	2.304872222	6.937507037	0.001877796	Fam21c
chr14_85600455_85600552_-	2.150516684	8.558395967	0.001896809	Nefh
chr1_95078861_95078863_+	2.083061532	7.447772603	0.001913825	Kcnc3
chr4_143921435_143921438_+	3.038063524	4.539223084	0.001913825	Itpr1
chr2_192541297_192541313_-	2.911250409	4.95499472	0.001915165	Pde4dip
chr20_1560728_1560767_-	2.800229667	8.375356001	0.001930691	Gabbr1
chr4_152363986_152364069_+	2.028060714	7.506900504	0.001930691	Fam21c
chr18_32176174_32176219_+	2.872759553	5.133745633	0.001945182	Arhgap26
chr1_84207982_84207984_-	3.285967547	4.122987046	0.001956243	RYR1
chr5_122287832_122287918_+	3.744339898	3.928377717	0.00197484	Dnajc6
chr10_95733527_95733611_-	3.219380629	4.43225868	0.001987764	Scn4a
chr3_159070419_159070454_+	7.188845097	4.572519594	0.00199022	Ptpn1
chr5_136937664_136937668_-	2.918398999	4.830069196	0.002027799	Akr1a1
chr1_207351658_207351659_+	2.274579877	6.40622026	0.002097997	Sptbn2
chr12_46160610_46160677_+	3.373568678	4.164335153	0.002106846	Noc4l
chr10_71386245_71386271_+	2.278479638	6.284340888	0.002107902	Ap2b1
chr6_128891375_128891433_-	3.305846767	4.17790377	0.002109809	Clmn
chr1_94795396_94795431_+	3.248781139	4.520665894	0.002111555	Shank1
chr1_84205054_84205129_-	3.322816123	4.300595599	0.002125768	RYR1
chr5_22037336_22037431_-	2.087534113	8.299066633	0.002136233	Car8
chr1_204842314_204842316_+	7.713641737	3.755158976	0.002165238	Shank2
chr5_169366426_169366493_-	3.151199444	5.309883921	0.002185796	Espn
chr8_61306728_61306784_-	2.191941525	6.140886475	0.002196892	Mpi
chr7_95835615_95835664_+	2.272708554	6.405672748	0.002202217	Mtss1
chr3_56146325_56146400_-	2.928093522	4.854805159	0.002218908	Chn1
chr5_148233893_148233895_+	2.685708824	5.136085351	0.002236521	Rnf19b
chr17_85596551_85596554_-	2.264775525	5.918589912	0.002255429	Fam107b
chr6_2771109_2771112_-	2.682265729	5.101723957	0.002256057	Atl2
chr1_85599043_85599070_+	3.063263329	6.5975091	0.002265988	Hspb6
chr10_86721547_86721641_-	8.387058344	3.741993714	0.002271328	Plxdc1
chr19_53838436_53838500_+	2.492576121	6.057118441	0.002281438	Gas8
chr12_2531514_2531602_+	2.419862859	8.75902681	0.00228552	Pcp2
chr4_160631598_160631602_-	4.31927043	3.888090637	0.00228552	Clstn3
chr1_207357676_207357689_+	2.632785008	6.741820324	0.002313066	Sptbn2
chr12_12047064_12047071_+	2.644285748	8.417973867	0.002313066	Actb
chr1_149267858_149267941_+	2.328595613	5.5587372	0.002321928	Dlg2
chr6_3239018_3239043_+	2.177368339	6.014475584	0.00232701	RGD1560224
chr18_32053587_32053629_+	2.49245624	5.062174372	0.002328381	Arhgap26
chr10_67752676_67752757_+	3.746167524	4.178091979	0.002342063	Abr
chr1_158846635_158846713_+	5.160838673	4.13536372	0.002377824	Arap1
chr10_46062567_46062628_+	2.440978898	5.050039191	0.00241291	Mprip
chr4_143963600_143963682_+	2.323125933	9.409284971	0.002413237	Itpr1
chr1_76757672_76757707_-	2.714694513	4.680436586	0.002423554	Grlf1
chr1_94814436_94814482_+	2.628614264	5.137259315	0.002425406	Shank1
chr1_163481027_163481096_-	3.576215279	4.068954246	0.002426504	Rrp8
chr3_106264346_106264358_+	6.962603491	3.138228749	0.002488863	Itpka
chr1_148781493_148781547_+	1.824825412	7.242968039	0.002523801	Dlg2
chr12_19752119_19752180_-	2.452092074	7.787427657	0.002523801	Agfg2
chr9_110321972_110322055_+	3.924471692	3.76102988	0.00253792	Myom1
chr9_62212184_62212244_+	2.695828134	4.863675965	0.002538578	Adam23
chr12_35296756_35296809_+	1.842504487	7.540614252	0.002554022	Atp2a2
chr11_84367294_84367366_+	2.030275637	5.711429048	0.002562072	Sept5
chr2_140445422_140445521_-	1.903216258	7.095608573	0.002562072	Setd7
chr18_32062208_32062282_+	2.75860497	5.377819804	0.002595597	Arhgap26
chr10_57567945_57568001_-	3.106706188	5.226616765	0.002601883	Camta2
chr9_83757359_83757457_-	2.786755364	4.986391963	0.002646927	Dner
chr1_158921561_158921616_+	4.803329515	3.640160387	0.002651856	Pde2a
chr13_96313861_96313901_+	3.747897026	4.633577466	0.002658469	Parp1
chr6_110022050_110022114_+	1.963968009	6.558776148	0.002658469	RGD1563583
chr4_161044318_161044372_+	2.11136522	8.699768774	0.002697999	Mlf2
chr6_53727035_53727055_+	7.50285092	4.253068284	0.002697999	Snx13
chr3_67926361_67926440_-	2.951310539	4.464244277	0.002746588	Zdhhc5
chr4_161119650_161119672_+	2.483819331	4.822704919	0.002746588	Pianp
chr1_207344939_207344941_+	2.838396925	5.311981301	0.00275389	Sptbn2
chr9_62176736_62176770_+	2.48930359	5.570648347	0.002767103	Adam23
chr5_22001328_22001396_-	2.073268092	8.33716455	0.002773089	Car8
chr6_73233734_73233824_+	2.175046624	5.875390891	0.002816173	Akap6
chr3_56166689_56166747_-	2.046933782	5.875758509	0.002816905	Chn1
chr8_104299495_104299536_-	4.424340876	3.885163922	0.002819286	Mras
chr15_2612649_2612686_-	2.315816494	4.811981049	0.002829647	Samd8
chr20_9899407_9899484_+	3.629616719	3.848634016	0.002887619	Pde9a
chr1_95079061_95079094_-	2.826239518	5.285752448	0.002899143	.
chr9_47811422_47811470_-	2.631545165	4.51700346	0.002929254	Tmeff2
chr19_41651170_41651246_-	2.776183954	5.05487497	0.002958073	Bcar1
chr18_28600057_28600076_+	3.390504649	4.089969068	0.002981943	Psd2
chr10_11009381_11009403_-	7.749573487	3.934975603	0.003025905	Dnaja3
chr19_26263643_26263696_-	2.200344892	7.26845071	0.003037176	Ndufb7
chr10_82585530_82585602_-	2.088920936	6.357499397	0.003061554	Nme2
chr7_37776924_37776982_+	4.302887871	3.775170488	0.003069912	Kitlg
chr4_152353035_152353068_+	2.251033902	7.012795236	0.003071859	Fam21c
chr1_207350575_207350576_+	3.602898063	4.192376849	0.003079412	Sptbn2
chr6_10967019_10967026_-	2.7581246	4.489323468	0.003128569	.
chr7_116127526_116127528_-	2.106366493	6.630418507	0.003140521	Pvalb
chr13_91565218_91565274_+	2.780614436	4.730564838	0.003152954	Uba2
chr7_116039344_116039347_-	2.482357832	4.786846816	0.003168614	.
chr1_20668478_20668556_+	4.515804821	3.549354702	0.003231743	Akap7
chr15_81233997_81234095_-	2.2475433	5.658035286	0.003268658	Dach1
chr12_27252970_27253011_-	7.603899033	4.138668147	0.003320011	.
chr6_92457866_92457867_-	7.313159043	4.04544352	0.003321826	Trim9
chrX_46425358_46425427_+	1.935239753	8.358021391	0.00332426	Frmpd4
chr7_27436322_27436354_+	2.257934569	5.821353604	0.003424069	Anks1b
chr2_137169615_137169651_-	8.141107922	3.276724189	0.003448051	RGD1307595
chr15_54008664_54008746_-	1.934680695	6.777368218	0.003468042	Itm2b
chr4_149668872_149668881_-	2.873729908	4.786612281	0.003515447	Atp2b2
chr4_56841525_56841610_+	3.38474195	4.118217629	0.003533186	Fam40b
chr15_5673691_5673719_+	2.342058145	4.97581072	0.00357559	RGD1559441
chr7_37782475_37782555_+	2.216039679	5.266794777	0.00363271	Kitlg
chr16_19193890_19193891_-	2.786051827	4.670113899	0.003638773	Rab3a
chr6_104473636_104473660_+	2.246856465	6.207054683	0.003705908	Plekhd1
chr10_46072245_46072247_+	2.820479545	4.309641538	0.003745087	Mprip
chr1_94808986_94808988_+	1.91787894	6.562726784	0.003752079	Shank1
chr4_166802208_166802210_+	1.959614701	6.515619294	0.003761995	Gabarapl1
chr15_47636263_47636268_+	1.860234116	6.549585848	0.003764859	Nefl
chr1_199304640_199304698_+	2.090738342	6.232237279	0.003777553	Inpp5a
chr1_95078066_95078068_+	2.349192816	5.782999467	0.00380938	Kcnc3
chr10_57485464_57485501_+	2.348983559	5.132137138	0.003841851	Mink1
chr10_46075797_46075799_+	2.86036444	4.711811747	0.003846924	Mprip
chr1_207344875_207344876_+	2.515489245	5.207803967	0.003870887	Sptbn2
chr1_204723441_204723500_+	2.790814003	4.528423873	0.003985612	Shank2
chr1_207346041_207346104_+	2.576582197	8.41280016	0.004024234	Sptbn2
chr8_112711542_112711629_+	1.965711825	7.629299809	0.004024234	Cacna2d2
chr15_59757625_59757714_-	2.564887881	5.172788231	0.004027511	Dgkh
chr3_76315075_76315082_-	2.154011917	6.504776713	0.004054219	Dgkz
chr10_43666588_43666684_+	2.364373152	5.179574479	0.004095628	Larp1
chr14_36537906_36537933_+	2.708119069	5.994599022	0.004129552	Usp46
chr13_67900288_67900314_-	4.32389809	4.557638283	0.004132807	Smg7
chr1_94793115_94793165_-	3.314823007	4.693726888	0.004149104	Clec11a
chr14_21097559_21097592_-	2.788844041	6.01696696	0.004153283	Utp3
chr10_83044342_83044345_-	2.424997803	5.40093165	0.004169916	Cacna1g
chr1_204841583_204841584_+	8.072546124	3.242082343	0.00417559	Shank2
chr12_35299059_35299114_+	1.863664919	7.990803952	0.004217933	Atp2a2
chr10_57078916_57078946_-	1.822019567	6.755648611	0.004224807	Rnasek
chr1_264398406_264398492_+	3.325294369	4.383867575	0.004261381	Atrnl1
chr1_94833412_94833424_+	3.735106169	4.139274993	0.004281115	Shank1
chr4_143869728_143869812_+	1.969132468	9.082568316	0.004295611	Itpr1
chr13_66216932_66216970_+	4.296867882	4.072700502	0.004297487	Ivns1abp
chr5_169520629_169520631_-	8.372728255	3.331286125	0.004437914	Hes3
chr11_69727529_69727601_-	3.104611616	4.665190943	0.004499792	Fyttd1
chr8_93566470_93566476_+	2.198752174	5.54932572	0.004499792	GABARAPL2
chr12_42580540_42580544_+	2.49445997	5.804932336	0.004573451	Dynll1
chr16_19624150_19624244_-	2.119057708	6.922181419	0.004596931	Homer3
chr4_149764082_149764084_-	2.561425222	5.20513194	0.004642733	Atp2b2
chr4_56820440_56820538_+	2.2793733	5.509238889	0.004659084	Fam40b
chr1_207330690_207330696_+	4.370999402	3.676660483	0.004763607	Sptbn2
chr4_143726473_143726556_+	2.207726322	8.230927196	0.004763607	Itpr1
chr10_10813295_10813312_+	2.804533742	6.402870531	0.004772305	Fam100a
chr12_40096813_40096871_-	8.199227685	3.466420187	0.004841917	Ksr2
chr18_3673696_3673767_+	4.304011057	4.225480815	0.004868065	Riok3
chr10_46063627_46063709_+	1.752344898	6.830999071	0.004873211	Mprip
chr1_84444038_84444137_+	2.823751105	5.046265784	0.004923757	DPF1
chr10_64310949_64310961_-	1.869930278	6.923057532	0.005018625	Aldoc
chr3_105659544_105659623_-	2.261825678	5.196594628	0.00510495	Fam82a2
chr10_64621728_64621821_+	3.614154389	4.787814466	0.005114358	Poldip2
chr10_83062258_83062352_-	2.713679951	5.367189675	0.005114358	Cacna1g
chr9_52575660_52575758_-	2.653274414	4.481980343	0.005114358	Stk17b
chrX_7098637_7098725_+	3.920845738	4.343367183	0.00520628	Fam70a
chr10_37795676_37795747_+	3.051278443	5.658557906	0.005263034	Vdac1
chr4_143866369_143866372_+	2.057847462	6.101805324	0.005281831	Itpr1
chr6_62282250_62282268_-	7.396035148	4.039111886	0.005281831	Ndufa10
chr7_95832279_95832314_+	2.387601347	5.388879156	0.005281831	Mtss1
chr5_40007822_40007824_+	2.455869789	4.622573603	0.005297382	Gpr63
chr6_133013292_133013321_+	4.408221425	3.489431825	0.005297382	Evl
chr4_152378910_152378986_+	2.549283943	4.827163625	0.005310817	Fam21c
chr4_56840176_56840223_+	2.291798421	5.069332568	0.005421969	Fam40b
chr7_1672140_1672198_+	2.600159582	4.525581006	0.005425202	Ankrd52
chr1_206437448_206437450_-	3.1694313	3.909854174	0.005465081	Ndufs8
chr9_105815469_105815558_-	3.420754442	3.710154936	0.005514215	Ptprm
chr1_100026669_100026734_+	3.786751797	4.412203281	0.005629004	Nell1
chr3_149489930_149489979_+	2.188683824	6.526145789	0.005658656	Ppp1r16b
chr3_116822872_116822968_+	1.862454651	7.041979071	0.005683029	Slc20a1
chr5_8709228_8709232_+	8.101039969	3.067396826	0.00578851	Cops5
chr3_149489265_149489361_+	2.498930952	7.821882791	0.005852473	Ppp1r16b
chr10_90295485_90295504_-	2.528368148	4.698021147	0.005873183	LOC100366152
chr6_124477528_124477581_+	3.345057897	10.463616	0.005899634	Calm1
chr14_86619681_86619759_+	7.67307593	3.597496974	0.005973015	Ykt6
chr9_104543040_104543096_-	3.05435298	5.077455015	0.005993164	Rab31
chr9_109748035_109748045_+	2.358325308	5.511771309	0.006014704	Dlgap1
chr10_72806667_72806738_+	2.646108427	9.183811936	0.006106161	.
chr17_88981598_88981599_+	1.945158937	5.79567326	0.006169168	Cacnb2
chr18_64172097_64172195_-	3.540599388	3.695613515	0.006261264	Cep76
chr18_32048245_32048313_+	1.890562962	7.589783901	0.006261715	Arhgap26
chr4_143730609_143730653_+	1.850213459	7.736283992	0.006393884	Itpr1
chr13_83017295_83017302_+	7.461172137	3.637565932	0.006407428	Aldh9a1
chr1_199333589_199333631_+	2.220420505	5.483582742	0.006537081	Inpp5a
chr3_147173792_147173851_+	2.032797755	6.034559459	0.006537081	Dlgap4
chr4_93472234_93472329_+	1.780485525	7.447805585	0.006537081	Grid2
chr3_147165889_147165937_+	2.002911527	5.750913461	0.00659913	Dlgap4
chr3_170454867_170454961_-	2.023999088	6.923476494	0.00659913	Stmn3
chr5_148237789_148237793_+	2.008711925	6.015226713	0.00659913	Rnf19b
chr1_199346520_199346612_+	2.456332772	5.154190064	0.006601439	Inpp5a
chr20_27397665_27397667_+	4.493988191	3.508575915	0.00664074	Spock2
chr11_58175826_58175892_+	2.660036869	5.3408872	0.0067278	Atp6v1a
chr10_46072361_46072366_+	2.543154091	5.426247846	0.006728336	Mprip
chr10_56678438_56678440_-	2.379501408	4.502004864	0.006775793	Nlgn2
chrX_4067313_4067338_-	2.534329761	4.803975652	0.006775793	Gria3
chr3_60298116_60298169_-	3.700779293	4.101429195	0.006796116	Zfp385b
chr3_155521256_155521349_+	2.15203084	5.094507368	0.00680734	Pigt
chr3_59913621_59913682_-	2.382607469	5.109255911	0.00684856	Sestd1
chr19_24775877_24775890_-	2.826047881	4.621955507	0.006878788	Tnpo2
chr1_185363668_185363671_+	2.887020076	4.137593472	0.006894427	Sbk1
chr12_11530383_11530433_-	8.053679473	3.33764876	0.006894427	Grid2ip
chr4_143966027_143966097_+	2.106219952	9.868013941	0.006903988	Itpr1
chr14_50651616_50651657_+	2.750920392	4.762690393	0.006959858	Arap2
chr1_78592852_78592924_+	3.058460969	3.836932843	0.006971551	Opa3
chr11_36857371_36857395_+	1.795121927	8.139894121	0.007012152	Pcp4
chr4_152363304_152363318_+	2.06142202	5.171065975	0.007036834	Fam21c
chr10_87123761_87123789_+	8.1657227	3.337352978	0.007049693	Ppp1r1b
chr6_128954686_128954775_-	2.4883224	5.250470806	0.007119362	Clmn
chr3_105654089_105654142_-	1.975999202	5.709104965	0.007128088	Fam82a2
chr2_258014418_258014420_+	3.04065498	3.92578923	0.00715872	Wls
chr4_143998905_143998906_+	2.309402184	4.668082613	0.007191564	Itpr1
chr10_65874741_65874812_+	1.603850863	6.933414474	0.007247173	Rab11fip4
chr18_77105703_77105770_+	2.71426061	5.806426113	0.007247173	Txnl4a
chr3_123861008_123861039_+	3.870737503	4.03821054	0.007247173	Plcb4
chr5_23557755_23557769_-	3.747957297	5.081903077	0.007247173	Asph
chr2_245076710_245076744_+	7.784194139	4.166014202	0.007356012	Ttll7
chr9_45071422_45071457_+	7.277068795	4.336377271	0.007400938	Asnsd1
chr13_48517191_48517226_-	2.735064357	4.411614967	0.007420038	Nav1
chr10_15098613_15098650_+	3.188111073	4.043449922	0.007499863	.
chr1_32828947_32829036_-	7.922076918	3.05259998	0.007504668	RGD1563545
chr10_13089609_13089642_-	2.509433713	6.207065818	0.007527411	Tceb2
chr11_68362744_68362830_+	8.012721231	3.256524961	0.007527411	Kalrn
chr18_29317009_29317014_-	7.765969209	3.06169685	0.007527411	Apbb3
chr5_1025238_1025289_-	3.599502118	4.299638699	0.007527411	Gdap1
chr12_2522949_2523034_+	3.001733483	4.233818226	0.007592014	Pcp2
chr1_207354575_207354576_+	3.678231519	3.81789174	0.007628004	Sptbn2
chr9_74474297_74474370_-	2.34942681	5.495415662	0.007633198	Atg9a
chr1_148524327_148524331_+	2.724972284	5.376584945	0.007660676	Dlg2
chr11_63928044_63928048_+	3.086314	4.322515579	0.007660676	Arhgap31
chr1_94825849_94825888_+	2.524709939	5.152027626	0.007660676	Shank1
chr10_61873946_61874029_-	2.333803142	5.990248789	0.007692725	Garnl4
chr12_36488267_36488335_-	2.937444204	4.38517819	0.007692725	Rpl6
chr13_80234516_80234518_-	2.292944773	5.768117505	0.007692725	Atp1b1
chr1_212788139_212788147_-	8.144112473	3.044422306	0.007693791	.
chr16_19193902_19193904_-	3.021669548	6.036904711	0.007719907	Rab3a
chr3_3760268_3760347_-	3.417776906	3.546258611	0.007751182	Rabl6
chr16_19619482_19619484_-	2.442707928	5.330737536	0.007807119	Homer3
chr10_64311079_64311176_-	2.274109933	8.778982615	0.007835005	Aldoc
chr5_169536219_169536221_+	7.818030338	3.285564566	0.00784694	Icmt
chr13_46179637_46179647_+	3.717932176	3.614503584	0.007852169	Plekha6
chr4_125336417_125336466_+	2.306270944	4.490157556	0.007939327	Hdac11
chr15_47638923_47638924_+	3.005353316	4.016312873	0.008017595	Nefl
chr7_80632654_80632660_-	7.691030632	3.637794979	0.008034084	Sybu
chr15_51000586_51000640_-	2.645563289	5.536186174	0.008034837	Fam160b2
chr12_35267090_35267092_+	2.339015023	4.51700225	0.008050246	Atp2a2
chr10_13979412_13979493_-	2.498949203	8.106493855	0.008142472	Ndufb10
chr14_7996913_7996945_+	2.312522198	4.628620199	0.008143411	Mapk10
chr10_109776328_109776335_-	2.490313084	6.610526057	0.008195756	Actg1
chr6_128882289_128882345_-	4.211370453	3.452005655	0.008265489	Clmn
chr5_23485450_23485496_-	3.348039436	4.05633195	0.008311582	Asph
chr4_184153025_184153097_+	2.878420572	4.80406127	0.008347649	Fgfr1op2
chr17_59797502_59797577_+	2.232596659	7.703878206	0.00844501	Arhgap12
chr8_112772208_112772271_+	8.5287266	3.646003114	0.008484742	Cacna2d2
chr3_108102607_108102608_+	2.216296724	5.547278723	0.00855958	Map1a
chr4_143962052_143962054_+	3.662480115	4.127807428	0.008602303	Itpr1
chr19_9815895_9815973_-	2.637508187	5.343859344	0.008602901	Ndrg4
chr1_193449949_193450043_-	2.841127774	5.32565808	0.008623719	Adam12
chr1_199359151_199359210_+	2.171385659	4.8943011	0.008623719	Inpp5a
chr6_71752447_71752546_-	1.725853765	6.474500639	0.008623719	Strn3
chr6_42782573_42782609_-	2.039808571	5.646887397	0.008625435	Id2
chr1_94791521_94791523_+	1.537073112	7.046403421	0.008647702	.
chr20_9896258_9896353_+	2.218315054	5.018524156	0.008655263	Pde9a
chr8_32032126_32032130_+	3.464195107	4.01032849	0.008669988	Rics
chr15_49743293_49743297_+	4.358951552	3.480731336	0.008676345	Nkx3-1
chr1_163556312_163556355_-	2.294741139	7.06238303	0.008940501	Mrpl17
chr1_207345665_207345666_+	2.026143696	5.051615513	0.008940501	Sptbn2
chr19_41880178_41880252_+	2.005360664	7.568515467	0.008940501	Gabarapl2
chr16_19448425_19448460_+	3.013196588	4.980744548	0.00899993	Tmem59l
chr3_108158852_108158915_+	1.796490699	7.20070884	0.009036631	Ckmt1b
chr4_164150777_164150861_-	2.009530379	5.371438261	0.009083863	Prmt8
chr1_212913187_212913189_+	3.429259978	3.578405612	0.009112135	Syt7
chr3_18794633_18794634_+	7.999681303	2.971002453	0.009112135	Arpc5l
chr1_267481240_267481326_-	2.472834308	5.045087748	0.009202437	Prdx3
chr19_11473414_11473419_-	2.507336606	5.007162545	0.009203328	Gnao1
chr7_120629302_120629324_+	2.412716901	4.90299663	0.009294058	1500009C09Rik
chr14_82767387_82767389_+	3.439719953	3.830948556	0.009330402	Slbp
chr4_93657421_93657494_+	1.742679798	7.286179096	0.009369593	Grid2
chr8_47027649_47027707_+	2.426106275	9.989279358	0.009422149	Thy1
chr10_52903357_52903389_-	3.5382697	3.723046783	0.009463695	Shisa6
chr16_49353475_49353478_+	2.122708869	7.766092467	0.009467927	Slc25a4
chr4_143869097_143869098_+	2.732083505	4.474864958	0.009467927	Itpr1
chr1_204597895_204597907_+	4.090013318	3.689852989	0.009496446	Shank2
chr3_76314813_76314827_-	4.109242899	3.726142159	0.009496446	Dgkz
chr4_166807309_166807396_+	2.028734391	5.603696548	0.009645592	Gabarapl1
chr10_89575548_89575550_-	2.011279469	5.488377633	0.00972383	Zfp385c
chr10_55848274_55848280_+	3.191223133	6.437099603	0.009737982	Vamp2
chr1_204842112_204842118_+	3.254769908	4.263427621	0.009737982	Shank2
chr1_207928625_207928636_+	1.919767397	5.841289697	0.009756675	Gal3st3
chr15_29775517_29775599_+	3.535891211	3.615070979	0.009756675	.
chr2_51589847_51589939_-	3.099301179	4.012647191	0.009780544	Nnt
chr9_36335401_36335494_+	2.033283512	5.372286078	0.009803458	Inpp4a
chr10_46079940_46080027_+	2.126798445	5.369856299	0.009835784	Mprip
chr20_1557098_1557196_-	1.904394063	6.890775716	0.00989717	Gabbr1
chr3_59911057_59911147_-	1.747292586	6.393201225	0.009914812	Sestd1
chr4_143864986_143865079_+	1.904353052	9.688131619	0.009914812	Itpr1
chr6_73152708_73152774_+	2.26456433	6.068468261	0.009914812	Akap6
chr6_128873122_128873173_-	2.412466187	4.427579949	0.009967375	Clmn
chr3_155521694_155521764_+	2.180344953	4.87375319	0.00997426	Pigt
chr20_27188110_27188117_+	3.153376878	4.148866135	0.010036647	Dnajb12
chr8_61264885_61264946_+	7.147146693	4.211004613	0.010118558	Cox5a
chr10_105809247_105809257_-	1.940206536	5.971337752	0.010226429	Grb2
chr12_7264382_7264474_-	2.343744557	4.886706801	0.010302503	RGD1562533
chr7_37714225_37714226_+	2.807741394	4.156625674	0.010322654	Kitlg
chr19_35697475_35697563_+	2.232876026	6.538724627	0.010329144	Nutf2
chr2_192586534_192586609_-	2.842866077	4.070279401	0.01032995	Pde4dip
chr2_77300988_77301085_+	1.881194267	6.371081875	0.010338176	Myo10
chr13_68735009_68735010_+	2.838693151	3.840122174	0.010368998	Rgs8
chr18_64182091_64182138_-	2.360458705	5.061359537	0.010417889	Cep76
chr6_110043812_110043908_+	1.96193497	5.221503317	0.010417889	RGD1563583
chr12_40491378_40491431_+	2.266860387	7.218453068	0.010469063	Pebp1
chr4_143859675_143859676_+	2.083961597	5.014206766	0.010469423	Itpr1
chr1_207318350_207318353_+	2.281563521	5.068591315	0.010505872	Sptbn2
chr4_148949964_148950049_+	7.660369978	3.055811885	0.010545282	Setd5
chr6_110050478_110050578_+	1.746753596	5.889143745	0.010604347	RGD1563583
chr3_71261720_71261728_+	2.105549672	6.92125864	0.010669755	LOC100361457
chr14_47379892_47379906_-	2.110579246	5.316659436	0.010683648	.
chr6_41551938_41551999_+	2.319763679	6.337225137	0.010691749	Hpcal1
chr18_30752524_30752526_+	8.050652872	3.11593799	0.010716408	pcdhg@
chr5_30479208_30479209_+	2.614991462	4.537355524	0.010716408	Calb1
chr18_28618975_28618981_+	2.747952836	4.628209035	0.01071819	Psd2
chr15_81375578_81375639_-	3.251866772	3.815366923	0.010767037	Dach1
chr7_55594294_55594379_+	1.634110121	6.372270713	0.010809689	Ptprr
chr9_74518683_74518760_+	1.669107767	6.796446325	0.010831373	Dnajb2
chr8_4074657_4074715_+	3.818714637	3.79664947	0.010933319	Dcun1d5
chr1_95071781_95071784_+	2.815688653	4.779971022	0.01105315	Kcnc3
chr4_152386948_152387023_+	2.040610921	5.707412989	0.011063106	Fam21c
chr7_116850198_116850212_+	3.592579266	3.992282581	0.01106889	Gga1
chr2_104273548_104273620_-	2.798528252	4.822135391	0.011077937	Armc1
chr4_182675981_182676060_-	2.158281682	5.962914447	0.011077937	Bcat1
chr12_35302225_35302285_+	1.799292888	8.242609434	0.011090294	Atp2a2
chr3_44185569_44185630_+	1.821785444	5.434297849	0.011090294	Slc4a10
chr1_207354391_207354392_+	1.697925394	6.425058135	0.011111377	Sptbn2
chr19_41649131_41649134_-	2.899939566	3.980576546	0.011111377	Bcar1
chr6_2443799_2443861_+	3.443943922	4.07268745	0.011131939	Fam82a1
chr6_3236934_3237013_+	1.676263714	8.228379196	0.011131939	RGD1560224
chr1_94839282_94839294_+	2.437244723	5.670637949	0.011135489	Shank1
chr1_80309843_80309844_-	7.53223048	4.037870123	0.011197561	Atp1a3
chr17_83552494_83552584_+	2.246820873	4.539838383	0.011204642	Cdc123
chr4_143868937_143868940_+	2.532323256	4.649029239	0.011208543	Itpr1
chr4_152343704_152343706_+	3.389737543	4.014473504	0.011233682	Fam21c
chr10_71472936_71472990_+	8.516110318	2.903023868	0.011244271	Ap2b1
chr19_24784689_24784693_-	3.271263108	4.550844968	0.011250027	RGD1564093
chr2_116143418_116143480_+	2.469917765	4.734273589	0.011251702	Eif5a2
chr13_1641702_1641778_-	2.957111363	4.532052509	0.011260747	LOC304725
chr14_83456475_83456478_-	8.121966863	2.961253975	0.011260747	Ywhah
chr4_10547796_10547887_-	2.400275395	4.294016006	0.011260747	Magi2
chr4_166802056_166802058_+	3.036095723	4.250064891	0.011557618	Gabarapl1
chr4_44277677_44277684_-	4.115723098	3.993745853	0.011557618	Cttnbp2
chr9_93254610_93254612_-	1.861351748	5.614544974	0.011594609	Chchd2
chr4_143898638_143898639_+	1.985649584	5.192076444	0.01162309	Itpr1
chr15_55641360_55641395_-	2.015907276	4.840264647	0.011624494	Lrch1
chr8_125582030_125582085_+	1.880903833	5.964972784	0.011638331	Rpl14
chrX_33007002_33007061_+	2.542034032	4.647412798	0.01166793	Amot
chr4_37796228_37796230_-	2.103282473	4.810047303	0.01167689	Thsd7a
chr10_1530967_1531044_+	2.242106392	6.042825994	0.011773553	Ntan1
chr4_56817196_56817242_+	3.146238448	4.26316676	0.011791675	Fam40b
chr15_806740_806786_+	2.635918904	4.230567832	0.011854858	Kcnma1
chr9_61393725_61393790_+	4.177218774	3.226220743	0.011854858	Nrp2
chr14_16478834_16478898_-	1.829683823	7.164178772	0.011876696	Sept11
chr9_36314571_36314631_+	2.266602161	5.24233367	0.011894233	Inpp4a
chr1_125287327_125287419_-	7.848028208	3.147904456	0.011928072	Nr2f2
chr8_85379288_85379293_-	2.163392741	4.897533472	0.011930514	Impg1
chr2_53945602_53945664_+	2.133951228	5.104404578	0.011989682	LOC100359544
chr10_39029320_39029384_+	2.204775637	6.673570691	0.012001144	Kif3a
chr10_83046232_83046242_-	3.313853224	3.831889752	0.01206597	Cacna1g
chr2_182764876_182764907_-	3.543200738	4.89858252	0.012073397	Snapap
chr10_55445368_55445376_+	2.019184579	8.004116599	0.012111218	Myh10
chr7_27868257_27868298_+	1.724685534	6.397202041	0.012111218	Anks1b
chr1_207351706_207351707_+	2.099957601	5.646721813	0.012189277	Sptbn2
chr16_71295489_71295566_+	2.230287579	4.496160554	0.012196701	Tacc1
chr1_207356693_207356695_+	3.043051859	3.863741902	0.01223794	Sptbn2
chr13_22855855_22855927_+	1.745097227	9.053291199	0.012251946	Cntnap5c
chr4_116862204_116862238_-	2.545702937	4.767765164	0.012251946	Pole4
chrX_56615190_56615290_-	1.753043365	6.524924915	0.012251946	Map7d2
chr3_116826359_116826409_+	2.171249509	5.042587005	0.01226766	Slc20a1
chr7_10928788_10928821_-	3.551930329	3.519345772	0.012282806	Rps15
chr6_3255519_3255550_+	2.247690117	5.244854453	0.012340519	RGD1560224
chr6_71756215_71756267_-	2.08541617	4.909837798	0.012340519	Strn3
chr7_121453204_121453233_+	2.545067016	5.478672374	0.012340519	Pacsin2
chr11_29816336_29816342_-	2.266879367	5.601704415	0.012386795	Sod1
chr5_128905602_128905682_+	2.577073628	4.611597598	0.012386795	Lrp8
chr7_85453912_85454011_+	2.290401527	5.309632525	0.012386795	.
chr1_93719822_93719835_+	2.493913515	5.494426992	0.012419063	.
chr7_115216211_115216213_-	1.651969031	6.256539559	0.012419063	Rbfox2
chr9_35474883_35474944_-	4.162763481	3.365157822	0.012428594	Ankrd23
chr20_9897049_9897115_+	2.249365301	5.304064921	0.012489172	Pde9a
chr6_26343124_26343142_+	2.485920976	4.506315882	0.012588396	Kif3c
chr8_73725602_73725623_+	7.405780388	3.673532945	0.012594858	Rora
chr1_64146596_64146597_-	1.951057634	5.175409302	0.012677341	Prkcg
chr8_4945797_4945895_-	1.511257606	6.509090551	0.012783565	RGD1563556
chr3_13783821_13783822_+	4.056491457	3.42991671	0.012788528	Hspa5
chr7_120721787_120721884_+	2.141105543	6.613030933	0.012810043	RGD1311310
chr20_9817877_9817919_+	4.368515038	3.437776054	0.012835267	Pde9a
chr3_108091359_108091366_+	3.111266836	4.351859328	0.012839089	Map1a
chr14_77932357_77932359_+	2.226231051	4.627233327	0.01293246	Nsg1
chr2_144665706_144665796_+	2.99749156	4.176417095	0.013171434	Dclk1
chr7_10396947_10396952_-	2.618473281	7.713245688	0.013204415	Oaz1
chr15_59790398_59790494_-	3.392168494	3.868947794	0.013281101	Dgkh
chr6_98923100_98923173_+	2.665577525	4.313957092	0.013402408	Akap5
chr4_152395686_152395751_+	1.669712942	5.813901184	0.013452628	Fam21c
chr5_63246609_63246693_-	1.924837509	6.179366801	0.013463982	Gabbr2
chr9_53027452_53027479_-	8.320386224	2.724667405	0.013463982	Hecw2
chr4_30539567_30539650_+	3.374101886	3.536724187	0.013470671	Dync1i1
chr10_10891192_10891219_+	2.398207222	4.929124953	0.013502663	RGD1310686
chr18_117985_118043_-	2.77247062	4.124668346	0.013541367	Fundc2
chr6_110052979_110053033_+	2.228244682	4.752404267	0.013602272	RGD1563583
chr5_148492262_148492286_-	3.527635322	3.680051928	0.013609395	Rbbp4
chr18_56918390_56918453_+	2.345286985	4.652912321	0.013663547	CAMK2A
chr13_40803989_40804044_+	2.861931429	5.824819533	0.013874054	R3hdm1
chr4_149845794_149845872_-	2.477877146	5.164915103	0.013974508	Atp2b2
chr1_234618830_234618884_-	2.451855953	4.928373115	0.014019765	Prkg1
chr7_95919602_95919649_+	2.035169068	5.268222861	0.014040835	Mtss1
chr1_94808129_94808132_+	2.161949449	5.273269086	0.014205693	Shank1
chr11_68378513_68378608_+	2.284062393	4.508326158	0.014568389	Kalrn
chr6_128870727_128870728_-	2.672651036	4.184904402	0.014642297	Clmn
chr10_53190230_53190231_-	4.16075955	3.57216433	0.014650292	Shisa6
chr17_85596440_85596442_-	2.896220997	4.064158978	0.014688432	Fam107b
chr15_60917004_60917034_-	4.197353906	3.185948325	0.014698932	Lect1
chr15_4147288_4147324_+	1.807487709	6.49069391	0.014741887	Mrps16
chr6_109945785_109945798_+	7.442458609	3.615087237	0.014748297	Ttll5
chr1_204853920_204853921_+	2.2107446	4.507369673	0.014854082	Shank2
chr13_31212378_31212424_+	2.925304804	3.756763655	0.014857571	CLASP1
chr4_125334225_125334315_+	3.161496454	3.979063903	0.014882523	Hdac11
chr14_83449337_83449338_-	2.206344533	4.641075587	0.014886582	Ywhah
chr17_15200642_15200690_+	1.73143578	6.151351288	0.014886582	Dbn1
chr3_41917332_41917403_+	3.443277125	3.876386879	0.014886582	March7
chr9_10435576_10435594_-	2.36588188	5.331714724	0.014886582	Mrps18a
chr9_8572009_8572084_+	2.843100516	4.307624608	0.014899718	Foxp4
chr3_59920483_59920567_-	2.19854895	5.093243047	0.014906135	Sestd1
chr20_11570441_11570469_-	2.322405146	4.42103636	0.014920121	.
chr2_123432991_123433071_-	1.575140081	7.419671286	0.014981728	.
chr10_46046144_46046201_+	2.264648379	5.40721052	0.015031757	Mprip
chr18_74735259_74735264_+	2.124487792	6.692061564	0.015042316	Atp5a1
chr8_48101990_48102037_+	2.301968378	4.897792879	0.015048434	Scn4b
chr3_18799278_18799314_+	4.097356345	3.026195011	0.015084426	Arpc5l
chr3_9007232_9007234_+	3.427805497	3.684821255	0.015084426	Sptan1
chr10_85587069_85587115_-	2.83951883	6.17709603	0.015204537	Nfe2l1
chr1_207356601_207356603_+	2.549311277	4.248257145	0.015220313	Sptbn2
chr12_36286656_36286732_-	2.317733882	4.704312905	0.015259873	Naa25
chr14_49361411_49361454_+	3.499443471	3.467554576	0.01532362	LOC100365768
chr4_160662632_160662724_-	2.242580727	5.344861555	0.015380792	Clstn3
chr8_112764860_112764902_+	2.535335887	4.644842114	0.01542349	Cacna2d2
chr4_87725529_87725587_+	1.974553987	5.17761082	0.01548675	Herc3
chr4_125875680_125875709_+	2.150275329	4.892116845	0.015548508	Slc6a6
chr1_158872518_158872520_+	8.187927268	2.696157752	0.015554876	Arap1
chr4_143859632_143859633_+	1.567038478	6.499919613	0.01557438	Itpr1
chr4_149665105_149665108_-	2.17879691	4.938551017	0.015702124	Atp2b2
chr7_129062132_129062199_-	2.602233879	4.524038896	0.015702124	Cpne8
chr19_41680759_41680800_-	3.252789107	3.886372111	0.015710818	Bcar1
chr5_22047329_22047351_-	2.608533214	4.401137192	0.016083652	Car8
chr10_14429967_14430021_+	2.502271905	5.746616002	0.016121684	RGD1565784
chr15_47703345_47703351_-	4.201275311	4.340786609	0.016121684	Nefm
chr4_161252103_161252165_+	2.112841781	5.670773847	0.016121684	Nop2
chr7_12951481_12951482_-	8.309754836	2.821159616	0.016129068	Wiz
chr12_7272232_7272309_-	4.229375576	3.343851711	0.016161581	RGD1562533
chr4_152388387_152388475_+	2.149611279	5.779209382	0.016231397	Fam21c
chr4_182674166_182674259_-	1.910902661	6.083398238	0.016274827	Bcat1
chr3_52789313_52789354_+	1.673268272	7.054217885	0.016302234	Gad1
chr11_80709743_80709800_+	2.681805318	4.018467383	0.016376568	Dgkg
chr12_28739923_28739968_-	2.047103848	6.730698254	0.016376568	Ran
chr1_95071238_95071241_+	1.97728617	5.289048988	0.016538327	Kcnc3
chr6_136455081_136455120_-	3.349919381	8.99658757	0.016559823	Ckb
chr10_55569971_55570031_+	1.966919651	5.486947276	0.016564256	Myh10
chr9_90338002_90338065_+	2.401604433	4.497808905	0.016669509	Lrrfip1
chr9_36310934_36311024_+	2.03987709	5.75417936	0.01669233	Inpp4a
chr5_160700753_160700840_-	2.263966298	5.092032113	0.016767805	Dnajc16
chr1_94797831_94797909_+	2.004524198	5.44539194	0.016786368	Shank1
chr7_37783202_37783245_+	3.466652315	3.740344089	0.016798453	Kitlg
chr4_796254_796255_-	3.314915948	4.015846933	0.016836553	Dnajb6
chr4_152380821_152380920_+	1.95814535	6.521949504	0.016893644	Fam21c
chr10_63390382_63390479_-	2.639529006	4.614633921	0.016972271	Fam101b
chr16_62351611_62351704_-	1.681733325	6.555112462	0.017094407	Ppp2cb
chr4_149727048_149727050_-	2.094561946	5.785186608	0.01714419	Atp2b2
chr17_52552496_52552563_-	1.676639979	7.046440076	0.017195569	Elmo1
chr4_104812552_104812572_+	3.133295723	3.889035168	0.017195569	Chmp3
chr15_18737708_18737784_+	2.364107592	7.904889827	0.017293976	Pdhb
chr8_85379403_85379404_-	7.646503079	3.285243726	0.017446676	Impg1
chr12_21859757_21859759_+	2.535023813	5.620388946	0.017521905	Ywhag
chr10_63384689_63384700_-	7.977367289	2.843304385	0.017571163	Fam101b
chr1_99814629_99814727_+	2.911422503	3.865859459	0.017571163	Nell1
chr1_212752593_212752651_-	7.881937699	3.38942114	0.017601137	Dagla
chr5_35477288_35477336_-	2.27487806	4.416350046	0.017764667	Nkain3
chr7_120290251_120290252_+	7.997305662	2.799397575	0.017883341	Csdc2
chr1_95071794_95071795_+	2.511035803	4.178323999	0.017974892	Kcnc3
chr5_169536475_169536479_+	2.109431833	5.05161265	0.018043358	Icmt
chr14_105002611_105002700_+	3.353141483	3.800642538	0.018091582	Bcl11a
chr15_36866861_36866944_+	1.809590369	6.349218813	0.018125224	Mrp63
chr3_13783636_13783646_+	2.156710761	7.652956731	0.018187609	Hspa5
chr1_249607923_249607951_+	2.402032479	7.807572328	0.018202009	Hif1an
chr10_89872923_89873011_-	2.398346909	4.627946055	0.018289768	Stat3
chr15_59787644_59787720_-	4.169350176	3.543666809	0.018289768	Dgkh
chr2_12119221_12119235_+	1.701910693	8.312731068	0.018289768	Mef2c
chr3_147081200_147081201_+	7.755879	2.950984292	0.018387393	Dlgap4
chr1_201559653_201559677_+	2.65922015	4.169032211	0.018477247	Eps8l2
chr1_148929258_148929260_+	3.106680151	3.79741593	0.018482802	Dlg2
chr12_43295193_43295286_-	2.409314954	4.487021505	0.018535474	Fam222a
chr9_110318006_110318043_+	4.503544343	3.262909517	0.018535474	Myom1
chr3_9011868_9011962_+	1.937953828	7.577443127	0.018542174	Sptan1
chr2_77350636_77350714_+	1.885937222	6.125651994	0.018615752	Myo10
chr14_85595716_85595718_-	1.461358076	6.960885038	0.018796107	Nefh
chr8_47725324_47725373_-	2.806449658	6.415718662	0.0188062	Arcn1
chr7_67223858_67223917_+	2.657616392	4.295648408	0.018810616	Dctn2
chr1_94833130_94833133_+	2.084884555	5.189840766	0.01885786	Shank1
chr9_74521982_74522038_+	2.382662247	4.744788164	0.01885786	Dnajb2
chr5_128965219_128965257_+	1.541239986	7.158671377	0.018913021	Lrp8
chr1_84314964_84315028_-	2.435786713	7.372210723	0.019040942	Psmd8
chr4_121982428_121982493_-	2.812541641	3.984056954	0.019144072	Rab43
chr1_64157992_64157993_-	7.956910057	2.837767604	0.019197855	Prkcg
chr2_197225096_197225122_+	8.66727981	3.252006878	0.019229763	Casq2
chr18_28922780_28922781_+	4.060279731	3.509502849	0.019363371	Pura
chr3_106265011_106265079_+	2.56222834	4.578798318	0.019430019	Itpka
chr10_53168165_53168167_-	4.015397976	3.346764571	0.019458554	Shisa6
chr18_32193030_32193106_+	1.844782129	5.486267843	0.019458554	Arhgap26
chr3_34192867_34192920_-	1.821678492	5.773185727	0.019458554	Cacnb4
chr7_26969511_26969578_+	1.776318858	7.476915013	0.019458554	Anks1b
chr4_151171799_151171830_-	7.577709779	3.321336937	0.019643302	Tamm41
chr8_66580960_66581024_-	1.924513533	5.904872262	0.019753271	Coro2b
chr13_68764420_68764424_+	1.518693222	6.698257166	0.019792311	Rgs8
chrX_26816150_26816235_-	2.278309597	5.275555162	0.019807554	Praf2
chr1_265455398_265455453_-	3.035887048	3.882634929	0.019830841	Hspa12a
chr7_12393459_12393460_-	2.886658593	4.007020611	0.01984495	Slc1a6
chr10_63130960_63131009_-	2.471843199	4.461638675	0.020007506	Doc2b
chr12_11172489_11172494_-	2.123609528	4.532197859	0.020010074	Cyth3
chr1_94794855_94794857_+	7.757710782	3.00036867	0.020010074	Shank1
chr3_133160898_133160975_+	2.306810966	7.327838639	0.020010074	Dtd1
chr10_57488699_57488763_+	1.785314167	5.357087769	0.020020517	Mink1
chr15_59764576_59764650_-	3.351390403	3.445928192	0.020180224	Dgkh
chr6_110035061_110035073_+	1.780878106	5.849723559	0.020267958	RGD1563583
chr9_87048646_87048691_-	2.821386153	3.79880003	0.020442749	.
chr1_207335403_207335404_+	7.475040222	2.813876589	0.020577626	Sptbn2
chr1_208695016_208695089_+	2.128966562	5.4967213	0.020577626	Fau
chr1_212788889_212788932_-	3.800411384	4.195776299	0.020577626	.
chr4_182651552_182651613_-	1.570266912	7.021911984	0.020577626	Bcat1
chr12_1538020_1538079_-	3.201924707	3.685613313	0.020604842	Snapc2
chr3_148275924_148275999_-	2.610303203	5.188717228	0.020604842	Blcap
chr4_143876879_143876880_+	1.63615708	6.386907019	0.020604842	Itpr1
chr4_146790521_146790600_-	8.854417661	2.995780149	0.02067814	Clmn
chr5_75828084_75828087_+	1.802670146	5.375196908	0.020756754	Akap2
chr10_92456242_92456317_-	2.374569571	4.635199192	0.020774831	Map3k14
chr6_73313728_73313739_+	1.838539102	5.297904815	0.020775183	Akap6
chr2_140301810_140301841_-	2.084129971	5.867302005	0.020845957	Ndufc1
chrX_153838065_153838076_-	4.010397724	3.241536924	0.020868061	Vdac1
chr4_160631437_160631438_-	2.839454169	3.925828024	0.020956609	Clstn3
chr5_128906435_128906526_+	2.505502697	4.150807957	0.02104878	Lrp8
chr4_119135659_119135747_-	2.22873384	4.398970057	0.021049254	Exoc6b
chr6_102998633_102998649_-	2.140760701	6.385970781	0.021112183	Rpl36
chr7_95945442_95945445_+	2.155129862	4.646488225	0.021269778	Mtss1
chr11_34617070_34617115_+	7.067571316	3.861865613	0.021273786	Ttc3
chr4_144020845_144020849_+	1.944388009	5.039151699	0.021420818	Itpr1
chr12_39753853_39753878_-	7.243650485	3.931302392	0.021493991	Fbxo21
chr17_15313271_15313293_+	7.154696108	3.879084507	0.021690037	Lman2
chr6_26343854_26343856_+	3.270393125	3.53494783	0.021702518	Kif3c
chr8_57413583_57413682_-	1.760351046	5.31705051	0.021722837	Elmod1
chr12_11521094_11521095_-	2.885111439	3.639885172	0.021833634	.
chr19_20940667_20940681_-	7.000463698	3.828962604	0.021985336	.
chr5_157213356_157213441_+	1.996678638	4.928259988	0.022036531	Mul1
chr4_119084091_119084162_-	1.612803813	5.557508034	0.022201242	Exoc6b
chr9_83820042_83820129_-	2.481980341	4.036498101	0.022207647	Dner
chr1_94680330_94680353_+	1.512532422	6.161128014	0.02236143	Hsd17b14
chr9_62187265_62187298_+	2.009899559	5.463728068	0.022499326	Adam23
chr7_104172887_104172983_-	8.078307112	2.906389303	0.022542987	Sla
chr7_37761241_37761274_+	3.927650224	3.144356585	0.022542987	Kitlg
chr1_96528711_96528755_+	3.844448576	3.756043702	0.022684368	Nomo1
chr1_8026106_8026108_-	2.661141088	4.174589279	0.022718648	Phactr2
chr4_67099839_67099865_+	2.780856749	5.303605075	0.022791817	Ndufb2
chr5_146692252_146692302_+	2.025538272	5.760727465	0.022791817	BC003266
chr4_139796399_139796407_-	2.212182665	4.415087739	0.022853398	.
chr4_30496415_30496421_+	1.986104495	6.919465501	0.022853398	Dync1i1
chr8_73813991_73814077_+	1.780947324	5.58800863	0.023080241	Rora
chr10_83061310_83061372_-	1.941702366	5.838984385	0.02314957	Cacna1g
chr1_64162434_64162492_-	2.076132525	5.335143843	0.023210092	Prkcg
chr3_52794286_52794321_+	2.821577488	4.100843395	0.023232327	Gad1
chr4_152383382_152383394_+	1.961118738	5.620686186	0.023274887	Fam21c
chr1_207344566_207344567_+	1.864381652	5.163038172	0.023357197	Sptbn2
chr9_62213600_62213646_+	1.854765433	4.893237571	0.023413031	Adam23
chr13_48451499_48451588_-	4.150506028	3.181297117	0.023772579	Nav1
chr5_40015164_40015171_+	2.410132195	4.654043511	0.023937131	Gpr63
chr14_84786072_84786122_+	2.283418339	6.13975479	0.024000901	Sf3a1
chr1_94808977_94808979_+	2.333548174	4.855350562	0.024127186	Shank1
chr10_46075236_46075238_+	2.714996976	4.319961425	0.024166931	Mprip
chr5_21981017_21981018_-	1.976136562	4.751349966	0.024166931	Car8
chr1_159882061_159882145_+	3.047307626	3.744476983	0.024181486	Stim1
chr18_74703198_74703280_-	2.774354657	4.135516411	0.024192676	.
chr5_148241235_148241321_+	1.435778511	7.408271584	0.024215931	Rnf19b
chr6_2734486_2734517_-	3.976161758	3.089492646	0.024235063	Atl2
chr13_107821647_107821739_+	1.487321751	8.016292365	0.024236686	Lpgat1
chr6_3285861_3285939_+	1.829656637	5.178680982	0.024236686	RGD1560224
chr19_12047383_12047472_-	1.690702409	5.710767216	0.024321959	Large
chr1_35143704_35143760_+	1.97608636	4.723935615	0.024329654	RGD1305235
chr10_15272402_15272502_-	2.895050353	3.890845891	0.024356138	Rab11fip3
chr12_10777290_10777347_-	2.520926942	4.249051485	0.024401107	Lmtk2
chr10_59880123_59880125_+	3.235220721	3.520908638	0.024546175	Atp2a3
chr8_85372941_85372945_-	2.796412092	3.738504492	0.024551278	Impg1
chr1_197176004_197176019_+	2.12721544	5.040218193	0.024606414	Glrx3
chr8_112775836_112775840_+	2.135808806	5.805714077	0.024606414	Cacna2d2
chr7_115158463_115158559_-	2.294765499	4.935580305	0.024639211	Rbfox2
chr15_59816482_59816561_-	3.926750364	3.15780444	0.024776894	Dgkh
chr15_59755668_59755736_-	2.636092666	4.13263487	0.024870201	Dgkh
chr2_12119289_12119290_+	3.643057369	3.708065295	0.024872323	.
chr3_75305108_75305203_+	2.518695506	5.278160889	0.025172022	Celf1
chr8_79970206_79970271_+	1.593663296	5.89274058	0.025258279	Myo5a
chr19_9811821_9811847_-	2.394200482	4.605998307	0.025477123	Ndrg4
chr19_9815426_9815457_-	2.348709519	4.946690468	0.025571274	Ndrg4
chr18_64176042_64176110_-	2.476439957	4.565534716	0.025571488	Cep76
chr3_149496406_149496409_+	8.401554002	2.597953702	0.025747944	Ppp1r16b
chr1_149259960_149260027_+	1.525023315	7.646106508	0.02577855	Dlg2
chr20_11397156_11397200_-	2.153277743	4.495686896	0.025856461	Sumo3
chr9_83723637_83723638_-	3.255590379	3.539114924	0.025962232	Dner
chr10_14144042_14144062_-	2.632878259	4.340076352	0.026193469	Eme2
chr7_131825868_131825916_-	2.724298038	4.17992124	0.026193469	Yaf2
chr9_62199902_62199944_+	2.44140772	4.0823054	0.026461423	Adam23
chr6_109156728_109156822_+	2.534697527	4.262293089	0.026570432	Dlst
chr18_32191495_32191524_+	2.150560148	4.348246144	0.026601282	Arhgap26
chr8_21124794_21124795_-	2.416656622	3.923603528	0.026601282	Elavl3
chr3_11478472_11478476_-	3.200826839	4.189199482	0.026657207	Dnm1
chr18_28609544_28609545_+	3.232421845	3.390152	0.026659792	Psd2
chr15_59768517_59768588_-	3.834164054	3.298694694	0.026993802	Dgkh
chr3_44116860_44116907_+	1.349940126	7.11124187	0.026996445	Slc4a10
chr6_26341879_26341903_+	1.818276522	4.910437325	0.027131129	Kif3c
chr1_80304923_80304980_-	1.662709654	7.45611333	0.027141461	Atp1a3
chr11_82463617_82463646_-	1.807922079	4.963727865	0.027179227	Eif4g1
chr18_30752680_30752687_+	1.951821249	5.856550336	0.027179227	pcdhg@
chr3_76316681_76316715_-	2.270548661	4.377155932	0.027197338	Dgkz
chr13_2059737_2059810_-	3.962077434	3.249316446	0.027281995	LOC304725
chr10_12852328_12852360_-	7.947166634	2.674482248	0.027294552	Zfp13
chr6_41976108_41976172_-	2.13407671	7.424592208	0.027354309	Ywhaq
chr12_27928395_27928477_+	6.992771734	3.842311908	0.027374659	Gbas
chr14_109434858_109434872_-	8.134941126	2.911471843	0.027470609	Ccdc85a
chr17_46074256_46074332_-	3.079278975	3.543565993	0.02756443	.
chr8_58260293_58260368_+	1.897494268	4.780895415	0.027604797	Dnaja4
chr17_50429683_50429690_-	2.664062324	4.025033772	0.027782337	Hist1h2bd
chr7_115847661_115847735_-	1.72590713	6.267456745	0.027782337	Txn2
chr4_152365101_152365145_+	2.120364636	4.514434167	0.02778298	Fam21c
chr5_61578530_61578589_+	8.772437781	2.715143853	0.027915435	.
chr11_31030947_31030950_-	7.733241911	2.80519781	0.02791982	Gcfc1
chr13_96320038_96320111_+	3.132763673	3.543912747	0.02791982	Parp1
chr1_24279819_24279878_+	7.724188268	2.965357131	0.028055119	CLVS2
chr3_92432810_92432818_+	3.942207784	3.35918924	0.028055119	.
chr7_124163441_124163538_-	1.759942359	6.104588249	0.028077091	Cerk
chr10_52895067_52895069_-	3.013199133	4.229842557	0.028077521	Shisa6
chr3_116299272_116299297_-	2.049932247	4.749595563	0.028077521	Anapc1
chr3_3454248_3454250_-	3.848933976	3.543571958	0.028134032	Grin1
chr4_143954877_143954880_+	3.751753293	3.39545148	0.028210449	Itpr1
chr10_10683840_10683912_+	1.90263762	5.992969652	0.028272872	Rogdi
chr20_18100581_18100645_+	2.071757518	5.476093948	0.028274334	Tfam
chr18_81528791_81528794_-	4.071449506	3.064637654	0.028296147	Timm21
chr6_128870684_128870685_-	3.123445835	3.372127283	0.028318305	Clmn
chr4_50657412_50657492_-	4.050498423	2.942571142	0.028351246	Ndufa5
chr8_73811637_73811737_+	1.829772577	5.508398566	0.028353065	Rora
chr4_143970402_143970479_+	1.678089846	9.7622686	0.028367718	Itpr1
chr10_67740402_67740461_+	4.178372909	3.022064908	0.028468987	Abr
chr6_3249544_3249545_+	2.721875578	3.707110425	0.02855608	RGD1560224
chr12_35300334_35300336_+	1.758454029	5.356896401	0.028591735	Atp2a2
chr4_149668670_149668751_-	1.894362451	9.57053641	0.028654706	Atp2b2
chr3_8998851_8998854_+	2.530599198	3.824434555	0.028675306	Sptan1
chr16_19624925_19624930_-	2.221774195	4.598732336	0.028701899	Homer3
chr1_64146586_64146587_-	2.716030795	4.146742954	0.028723723	Prkcg
chr10_10960301_10960365_-	1.873094831	7.681667384	0.028796913	Hmox2
chr6_3263933_3264031_+	2.091100878	5.418209956	0.028796913	RGD1560224
chr7_120321862_120321865_+	8.289491407	2.731476162	0.028798196	Csdc2
chr10_83197141_83197196_-	8.737262261	2.820965291	0.028840845	Acsf2
chr7_142125534_142125628_-	1.610516521	6.842622845	0.028859485	Cbx5
chr4_164137647_164137740_-	1.682132388	6.577741004	0.028922794	Prmt8
chr10_4249150_4249182_+	2.116839214	6.851736752	0.028933978	Gspt1
chr7_57519188_57519259_+	1.523085473	6.364006708	0.028982245	Il22
chr16_19619530_19619531_-	7.934626151	2.647899894	0.029071938	Homer3
chr3_8969882_8969883_+	2.444796451	3.835178768	0.029127942	Sptan1
chr17_15168799_15168856_+	3.069077055	3.826306986	0.029281565	Pdlim7
chr1_212756548_212756623_-	3.959107162	3.261089909	0.02935574	Dagla
chr10_10816473_10816503_+	4.100813851	2.973262627	0.029361917	Fam100a
chr19_53828973_53829072_-	2.690884016	4.004456712	0.029509362	Dbndd1
chr5_21995169_21995254_-	1.692315301	9.161763895	0.029519707	Car8
chr1_64172425_64172427_-	2.178305352	4.711471437	0.029554971	Prkcg
chr4_117562519_117562568_+	2.260323273	5.2038191	0.029751243	Bola3
chr5_63299425_63299517_-	2.043023877	5.257513612	0.029751243	Gabbr2
chr3_124047125_124047162_+	1.571830465	6.068188165	0.029756737	Plcb4
chr6_35830414_35830502_+	2.06910119	4.783990619	0.029756737	Fam49a
chr9_24495898_24495903_-	4.417718582	3.170537121	0.029756737	Bai3
chr6_58536126_58536140_-	2.043636912	6.415200672	0.029767183	LOC100362999
chr19_9815213_9815245_-	1.697175399	5.729566399	0.029800865	Ndrg4
chr1_95079021_95079022_+	2.250308285	4.449770164	0.029818692	Kcnc3
chr1_64147025_64147026_-	8.555142445	2.984620052	0.029821222	Prkcg
chr3_98090685_98090722_+	2.453966136	4.522743247	0.029821222	Lpcat4
chr4_144002515_144002517_+	1.400848995	6.747810219	0.029821222	Itpr1
chr2_77368553_77368619_+	3.840098016	3.297610809	0.02987967	Myo10
chr3_146551205_146551246_+	2.232705413	5.722716536	0.02987967	Romo1
chr3_50912338_50912340_+	3.14926819	4.382581187	0.030094968	RGD1564400
chr15_934905_934908_+	2.510823113	3.77583181	0.030100239	Kcnma1
chr19_37459340_37459423_-	2.327054846	6.523930113	0.03038223	Psmd7
chr11_36828235_36828300_+	1.742703246	10.59291491	0.030391833	Pcp4
chr4_118032285_118032374_-	1.99930149	7.041183597	0.030391833	Paip2b
chr8_113851117_113851127_+	3.157895005	3.522532185	0.030399337	Ip6k2
chr10_57534376_57534378_-	8.480631921	3.237277548	0.030639401	Pfn1
chr14_61677899_61677977_-	3.902240638	3.231617938	0.030846821	Stim2
chr10_56190323_56190329_+	2.087783388	5.592432601	0.030979517	Lsmd1
chr1_96291283_96291365_-	1.962410035	4.508895491	0.031111475	Cyth2
chr17_4462469_4462479_-	2.082167644	4.871335808	0.031172092	.
chr17_85654788_85654789_-	2.570973035	4.090961758	0.031248827	Fam107b
chr20_1577859_1577861_-	2.313819329	4.187027991	0.031248827	Gabbr1
chr3_108216369_108216395_+	3.857236007	3.800632474	0.031463196	Pdia3
chr17_90572337_90572392_+	4.0543063	3.241108129	0.03159351	Plxdc2
chr10_90176545_90176564_+	4.062646757	3.019332428	0.031671033	Tubg2
chr20_17985958_17986013_+	3.914299974	4.313765025	0.031671033	Cisd1
chr11_30919518_30919539_-	2.081129851	6.92616359	0.031691664	RGD1306954
chr10_72792556_72792615_-	1.660965072	8.096099132	0.031789463	Aatf
chr4_84855653_84855654_+	2.067193286	4.81807717	0.031988194	Ppp1r17
chr3_155509343_155509345_+	3.878880189	3.022700042	0.032178123	Dbndd2
chr4_93729998_93729999_+	1.920941095	4.820928284	0.032178123	Grid2
chr8_48103313_48103332_+	2.509337157	3.884491741	0.03230255	Scn4b
chr10_63126275_63126317_-	2.10736744	4.460817843	0.03249096	Doc2b
chr16_9004927_9005001_-	7.018107713	3.72772608	0.03249096	Mapk8
chr6_23990243_23990272_-	7.880187027	3.003058053	0.032572842	Wdr43
chr3_3454363_3454365_-	2.414870967	4.295530047	0.032605202	Grin1
chr1_148968995_148969072_+	2.200659554	5.273434823	0.032607285	Dlg2
chr10_71015634_71015685_+	3.838533454	3.068574889	0.032664374	Lig3
chr13_96318746_96318747_+	2.634550987	3.917390679	0.032664374	Parp1
chr15_25781062_25781149_-	1.535613135	7.312691865	0.032664374	RGD1310110
chr3_78844741_78844802_-	1.757103321	6.540167332	0.032664374	Api5
chr8_73819582_73819585_+	2.416501552	3.767049652	0.032664374	Rora
chr10_46072960_46072967_+	1.468179928	6.535933303	0.032778458	Mprip
chr5_163341003_163341043_+	1.805474262	4.657467159	0.032780098	Dhrs3
chr10_7137154_7137248_-	2.085490982	7.782907786	0.032856924	Abat
chr2_195936174_195936244_+	2.151647734	4.716254765	0.032878266	Vtcn1
chr2_224282403_224282472_-	1.682328838	5.424703456	0.032962243	Ank2
chr6_109965769_109965840_+	4.017635074	3.138771592	0.033051554	RGD1563583
chr8_79934479_79934540_+	1.69804942	4.889220288	0.033088636	Myo5a
chr5_156718749_156718831_+	2.79787984	3.597857321	0.033178951	Ece1
chr2_77313136_77313206_+	7.774729323	2.782211372	0.03338349	Myo10
chr8_49252314_49252316_+	3.262308599	3.577994241	0.033428125	Apoa5
chrX_73108014_73108028_+	1.597823843	6.035377762	0.033448299	Rab1b
chr18_77118101_77118176_+	2.907075278	3.756004838	0.033495861	Txnl4a
chr20_6870821_6870916_-	1.990408985	6.236923969	0.033559973	Srpk1
chr1_207344281_207344282_+	3.930041383	3.039123942	0.033579858	Sptbn2
chr8_73812521_73812600_+	1.970650705	5.456282205	0.033734848	Rora
chr8_19669484_19669554_+	1.800647037	7.870809435	0.033802943	Pin1
chr3_48292753_48292823_-	2.266671852	4.155834453	0.033873861	Scn1a
chr10_83099885_83099949_-	3.787574758	3.663262386	0.033877928	Cacna1g
chr4_166802096_166802097_+	1.801367692	4.949223103	0.03388368	Gabarapl1
chr13_76835514_76835550_-	2.709198073	4.269819648	0.034006613	Prdx6
chr18_73811160_73811250_+	1.580535537	5.57347101	0.034025989	Skor2-ps1
chr9_14424241_14424244_-	2.304039669	3.912234691	0.034029291	Ptchd4
chr3_114947484_114947525_-	2.075853474	5.593713812	0.034121504	Fahd2a
chr4_180063921_180064016_-	2.007613946	5.039728749	0.034197705	Ldhb
chr8_73815285_73815369_+	1.489304739	6.224594001	0.034197705	Rora
chr4_160595828_160595904_-	2.902778407	3.796647842	0.034234558	Pex5
chr5_25446208_25446271_-	1.624393742	6.629001129	0.034245629	.
chr4_143919324_143919325_+	2.114820935	4.565875244	0.034265831	Itpr1
chr19_36742059_36742101_-	2.599901101	5.631158286	0.034472128	Chtf8
chr16_80623508_80623564_-	3.389803613	3.85469312	0.034506544	Upf3a
chr10_16889488_16889574_-	2.379619416	4.249949512	0.034541584	Ergic1
chr1_212758446_212758546_-	8.369602251	2.606515879	0.03463507	Dagla
chr13_35722334_35722387_-	3.95286023	3.006544509	0.034655675	Dpp10
chr4_143878193_143878194_+	1.904579912	4.5470563	0.034655675	Itpr1
chr19_54703226_54703309_+	2.135425164	5.864330868	0.034685023	Cog2
chr7_73481150_73481228_-	2.282961558	4.408971514	0.034783354	Ubr5
chr3_124016563_124016619_+	2.079205306	4.39434261	0.034800743	Plcb4
chr10_67716660_67716753_+	2.711153945	3.705017263	0.034826709	Abr
chr13_68767963_68767966_+	7.774677326	2.66333151	0.034883032	Rgs8
chr8_44976071_44976140_-	2.406091701	4.120059274	0.034888722	Sorl1
chr17_52329248_52329339_-	2.526726128	3.995313613	0.0348935	Elmo1
chr18_56919322_56919415_+	2.711517189	3.988178985	0.035061198	CAMK2A
chr20_1554335_1554338_-	1.955218722	5.268091517	0.035061198	Gabbr1
chr4_182663268_182663269_-	1.797056269	4.793952313	0.035061198	Bcat1
chr1_158885743_158885780_+	1.928266248	4.601322873	0.035149087	Arap1
chr1_204851541_204851542_+	7.824955863	2.692790076	0.035231806	Shank2
chr15_59790792_59790871_-	3.913604358	3.123409418	0.035231806	Dgkh
chr19_22853626_22853710_+	2.472860358	6.353188581	0.035268599	Dnaja2
chr3_9002032_9002033_+	2.827878123	4.078795458	0.035499216	Sptan1
chr7_9936606_9936618_+	7.032804418	3.711193711	0.035502445	Mrpl54
chr1_204828149_204828191_+	3.745946189	3.172128176	0.035577272	Shank2
chr5_36502618_36502691_-	1.636840466	6.694332564	0.035580472	Tstd3
chr10_63387981_63388061_-	2.597524202	4.258565885	0.035635691	Fam101b
chr1_204725034_204725127_+	2.421449394	4.285102621	0.035635691	Shank2
chr1_82624589_82624656_-	1.553856493	5.672019818	0.035671307	Pld3
chr12_42602009_42602025_-	2.001341908	6.714582378	0.035834509	Coq5
chr19_9810551_9810558_-	2.280669798	3.982637511	0.035903774	Ndrg4
chr9_62208131_62208202_+	1.638547864	5.962988372	0.035922724	Adam23
chr1_158273936_158274034_+	1.490934234	5.835667706	0.035927175	Fam168a
chr9_82206168_82206198_+	2.022071886	4.702253195	0.03595881	Agfg1
chr20_1554382_1554384_-	3.041913	3.795717305	0.036003242	Gabbr1
chr2_191045448_191045450_-	4.035678207	4.221302624	0.036099181	Hist2h2aa3
chr1_233065359_233065453_+	1.942425408	4.921475547	0.036112526	Cd274
chr1_207341594_207341595_+	1.872641993	4.804554965	0.036128238	Sptbn2
chr1_207356307_207356309_+	3.147236838	3.449378118	0.036145535	Sptbn2
chr1_99805571_99805580_+	3.072819656	3.281742727	0.036157094	Nell1
chr19_37036323_37036413_+	2.94858808	3.790925517	0.03629618	Cyb5b
chr18_28611052_28611053_+	2.834004579	3.454656391	0.036362497	Psd2
chr2_235670010_235670083_+	1.873125705	4.966488113	0.03654704	Trmt10a
chr1_207337735_207337747_+	1.604405226	5.515729474	0.036571449	Sptbn2
chr10_105373643_105373675_-	3.395102884	3.780182292	0.03664815	Fads6
chr10_108253427_108253460_-	2.011839525	6.062871311	0.036709879	Cyth1
chr9_62203183_62203232_+	1.63742482	5.691041522	0.036709879	Adam23
chr4_120580228_120580308_-	2.700492191	6.917471309	0.036766539	Pcyox1
chr14_84363320_84363410_-	3.843269906	3.467569548	0.036854323	Osbp2
chr3_103398037_103398116_-	8.743142402	2.537675325	0.03694005	Rasgrp1
chr10_68281871_68281953_-	2.34359876	4.051893837	0.036985431	Crlf3
chr14_110245569_110245597_-	2.363096642	5.40733499	0.037127013	Ccdc104
chr4_164158230_164158286_-	2.156158439	5.079897532	0.037127013	Prmt8
chr1_232624648_232624654_+	1.953906833	5.584924516	0.037142968	Cdc37l1
chr4_149658737_149658739_-	2.427602415	4.486481775	0.037142968	Atp2b2
chr7_138369345_138369444_-	2.34893735	3.960276871	0.037142968	Racgap1
chr8_112753583_112753603_+	2.724426843	3.698267816	0.037142968	Cacna2d2
chr2_182303959_182304033_+	1.710330237	8.715491012	0.037259856	Tpm3
chr9_36238212_36238310_+	2.517608065	6.209482771	0.037259856	Inpp4a
chr20_1572775_1572845_-	1.339579591	7.79539499	0.037368683	Gabbr1
chr9_106210649_106210704_-	3.084872262	3.544739264	0.037368683	Ptprm
chr1_241646023_241646114_-	2.887427325	3.789809389	0.037684154	Ide
chr9_92383230_92383311_-	2.301260855	7.171057928	0.037936513	KIF1A
chr5_148278406_148278495_-	2.196300287	5.816984315	0.037967882	Hpca
chr1_80282539_80282639_-	1.303304019	7.228097259	0.037987848	Atp1a3
chr10_72755544_72755626_-	1.694886849	4.857222319	0.038160709	Aatf
chr3_59879046_59879100_-	3.910122389	3.133441816	0.03822329	Sestd1
chr10_43655801_43655823_+	1.600679948	6.520935229	0.038258728	Larp1
chr10_57484728_57484780_+	3.224074502	3.237267365	0.038342322	Mink1
chr14_80509595_80509649_-	1.805264543	4.933504211	0.038413331	Ablim2
chr6_145146016_145146102_+	2.910160219	3.537981535	0.038413331	Cdca7l
chr1_137554199_137554204_-	1.933215609	4.399621657	0.038465673	Rps17
chr10_40407246_40407339_-	2.03290843	5.432964498	0.038539174	Anxa6
chr15_10761211_10761215_-	2.48697843	3.749085483	0.038539174	.
chr1_80300698_80300739_-	2.131612498	6.428194167	0.038618411	Atp1a3
chr4_149725969_149726066_-	1.63080683	10.13050285	0.038624396	Atp2b2
chr12_10719059_10719062_+	2.147193351	5.914050541	0.038650954	Tecpr1
chr1_84171613_84171675_-	3.850145052	3.162554026	0.038650954	RYR1
chr8_32026339_32026340_+	4.43802153	3.400378552	0.038650954	Arhgap32
chr12_7260966_7261031_-	2.553664299	4.033394894	0.038688739	RGD1562533
chr1_180812733_180812798_-	2.13846268	4.482758468	0.038917086	Cog7
chr10_64309100_64309117_-	1.261452975	6.924745924	0.039271772	Aldoc
chr1_95982400_95982481_-	1.677659009	6.94256112	0.039271772	Nucb1
chr4_119239949_119240024_-	2.135206337	9.451343567	0.039271772	Exoc6b
chr8_29682989_29683013_-	1.425684836	8.245266185	0.039299831	Ntm
chr1_207355528_207355529_+	2.424592112	4.173320129	0.039326605	Sptbn2
chr10_72803219_72803228_-	2.27010261	4.198479896	0.039390373	Lhx1
chr2_256182512_256182536_+	2.730815874	3.911619285	0.03942092	Lrrc40
chr16_19191249_19191250_-	7.589264435	3.174215553	0.039550523	Rab3a
chr10_57484514_57484536_+	2.086693046	4.458113122	0.039729057	Mink1
chr17_14489109_14489113_+	2.939197137	4.176461027	0.039835575	H2afy
chr3_8995541_8995620_+	1.409193181	6.37450258	0.039974124	Sptan1
chr1_263931482_263931499_+	2.300118548	3.853041111	0.039990975	Atrnl1
chr8_112761226_112761228_+	1.880991451	5.751988077	0.039990975	Cacna2d2
chr1_96560306_96560373_+	1.899705543	5.284392141	0.039993339	Nomo1
chr15_47638341_47638440_+	1.775216383	8.647338928	0.040027207	Nefl
chr5_141165459_141165492_-	2.033357938	5.281280247	0.04015559	Ctps
chr18_16903728_16903802_+	2.018305023	4.686127858	0.040193971	Fhod3
chr1_94839888_94839896_+	2.029816894	5.522037836	0.040242728	Shank1
chr8_21132543_21132547_-	2.129418333	4.401412538	0.040604118	Elavl3
chr11_58154331_58154367_+	7.786611325	2.978785107	0.040783817	Atp6v1a
chr8_66613046_66613134_-	2.599008723	3.757402606	0.04094954	Coro2b
chr3_9194235_9194297_-	1.526696499	6.574050968	0.041018933	D2Wsu81e
chr9_57540767_57540771_-	3.381190859	3.526188347	0.041018933	Trak2
chr8_62298300_62298304_+	1.923019422	4.888159682	0.041189134	RGD1562618
chr18_77150659_77150697_+	1.942441968	4.68344432	0.04125532	Pqlc1
chrX_147110368_147110398_-	2.964411837	3.661301703	0.041278461	.
chr5_165531308_165531401_+	7.310349776	3.049230209	0.041375742	Mtor
chr16_47588821_47588918_+	7.310203782	3.049235261	0.041379776	Wwc2
chr9_62242314_62242378_+	2.362498035	4.320446212	0.04164345	Adam23
chr2_77348883_77348970_+	1.752602713	5.658607335	0.041671785	Myo10
chr9_62193846_62193887_+	2.362194692	4.052995066	0.041671785	Adam23
chr7_132062907_132062955_-	3.88650672	3.185632092	0.042275352	Prickle1
chr10_59883968_59884014_+	1.401428843	6.941707268	0.042359639	Atp2a3
chr10_65874233_65874241_+	3.90664512	2.805135005	0.042531287	Rab11fip4
chr11_36889012_36889013_+	1.451466042	5.825848661	0.042556964	Pcp4
chr18_29900482_29900540_+	1.753878855	4.809931832	0.042646077	Pcdha@
chr2_77561973_77562067_+	2.758101322	3.707740262	0.04272077	Fam134b
chr6_26343368_26343370_+	4.219652486	2.821531206	0.042801883	Kif3c
chr5_134780728_134780741_+	2.27657005	3.939978551	0.042896366	Trabd2b
chr13_68734587_68734598_+	4.17962076	3.285361801	0.042909684	Rgs8
chr10_16820788_16820877_-	2.636815623	3.55973749	0.043197652	Ergic1
chr1_207345546_207345547_+	1.529313893	6.101163511	0.043198121	Sptbn2
chr19_11488963_11489063_-	1.391276231	7.495914792	0.043270847	Gnao1
chr19_12115657_12115749_-	8.755532707	2.688767527	0.043270847	Large
chr4_37691135_37691234_-	8.186481171	2.629749774	0.043385478	Thsd7a
chr10_18565695_18565790_-	2.296723292	4.12582572	0.043588757	Kcnip1
chr1_212742193_212742242_-	7.495341945	3.441292221	0.043588757	Dagla
chr4_143833634_143833637_+	2.15248469	4.366257836	0.043588757	Itpr1
chr6_110012937_110012965_+	3.814280778	2.899939429	0.04378527	RGD1563583
chr12_36230740_36230741_+	1.901928391	4.722974817	0.043797879	Erp29
chr3_108255188_108255263_+	2.301115752	7.954196678	0.043836864	Serf2
chr16_61768267_61768357_+	2.218400217	4.663540389	0.04388178	Leprotl1
chr14_44118844_44118898_-	2.558173872	3.927809749	0.043953989	Uchl1
chr17_21067057_21067071_-	1.94054835	4.998337985	0.043980661	.
chr3_155519450_155519452_+	2.473012356	3.72372106	0.043980661	Pigt
chr8_4079900_4079961_+	2.375038766	3.856418524	0.044130563	Dcun1d5
chr17_15044635_15044732_-	2.29858533	5.319943305	0.044292531	Camlg
chr10_52894948_52894957_-	1.478969093	6.517355795	0.044364555	Shisa6
chr12_35986459_35986503_-	1.575338326	5.151504901	0.044673881	Atxn2
chr3_56514371_56514372_-	2.550166762	3.950139041	0.044673881	ATP5G3
chr8_45032638_45032698_-	1.649605388	5.312005507	0.044673881	Sorl1
chr16_47600594_47600688_+	1.898387954	4.617736858	0.044893043	Wwc2
chr5_169625369_169625453_-	1.934942502	4.498111539	0.044930426	Kcnab2
chr10_110009305_110009356_-	7.109971913	3.601523976	0.044979778	Pcyt2
chr1_84171902_84171968_-	7.82315502	2.746870094	0.045209768	RYR1
chrX_56612711_56612811_-	1.617153947	7.00794206	0.045220278	Map7d2
chr3_124009255_124009333_+	1.953387915	5.087312637	0.045223354	Plcb4
chr1_199391054_199391137_+	1.870974708	5.58092116	0.045555973	Inpp5a
chr7_128974121_128974154_-	8.399127721	2.76248625	0.045599864	Cpne8
chr1_207341504_207341506_+	8.398083153	2.762464115	0.045674584	Sptbn2
chr4_143962010_143962011_+	1.542207435	5.218554774	0.045738931	Itpr1
chr2_197218611_197218711_+	2.325705903	4.074717686	0.045848947	Casq2
chr4_121008567_121008569_+	1.748649472	4.970345273	0.04623508	Aak1
chr7_142250165_142250218_-	2.183588796	4.611689715	0.046247798	Zfp385a
chr18_32318135_32318212_+	3.950650998	3.027167259	0.046248847	Arhgap26
chr14_79256626_79256715_-	2.255374981	4.285307829	0.046736916	Jakmip1
chr15_54214215_54214257_+	2.515835815	7.751642254	0.046941997	Sucla2
chr12_35277538_35277613_+	1.476456743	9.666760632	0.046968369	Atp2a2
chr17_6484151_6484250_-	2.046551414	4.372250021	0.04698497	Habp4
chr16_6450405_6450453_-	3.460762353	3.406457793	0.046988285	Gnl3
chr1_186876055_186876090_+	2.781882911	3.8971301	0.047054802	Rnf40
chr19_36887182_36887193_+	3.919695675	4.111191945	0.047054802	Vps4a
chr4_149764172_149764174_-	1.572725696	5.873303222	0.047088351	Atp2b2
chr4_185777680_185777682_+	2.944963504	3.454113295	0.047090414	Far2
chr13_68739499_68739503_+	2.985323482	3.356513147	0.047185428	Rgs8
chr14_16501199_16501287_-	1.742751321	4.768425714	0.047422924	Sept11
chr4_180409769_180409844_-	3.769775603	3.157944911	0.047654295	Sox5l1
chr4_161286069_161286090_-	1.527365666	5.604098541	0.047664062	Gapdh
chr7_116628351_116628368_-	2.300906984	3.999507028	0.047664062	.
chr10_46073132_46073133_+	3.188239052	3.367369851	0.047748096	Mprip
chr14_77932397_77932399_+	1.593800439	5.327964436	0.047832577	Nsg1
chr9_33049210_33049308_+	1.75586775	6.431741962	0.047872244	Dst
chr7_55576435_55576438_+	3.786401947	3.306037086	0.047900002	Ptprr
chr6_128854004_128854007_-	2.652931097	3.545356469	0.047992532	Clmn
chr13_86025586_86025628_-	3.769632599	3.048160486	0.048019588	Uhmk1
chr20_1554442_1554443_-	3.642910631	3.697388278	0.048107123	Gabbr1
chr6_3250008_3250009_+	1.782668067	4.678058504	0.048211918	RGD1560224
chr7_95808248_95808250_+	2.165965803	4.330576517	0.048211918	Mtss1
chr3_8814989_8815071_+	1.447045995	6.484629332	0.048293536	Urm1
chr6_128871281_128871283_-	2.615317675	4.025230373	0.048297666	Clmn
chr5_169409335_169409341_+	7.107527669	3.581679324	0.048343108	Acot7
chr5_156424630_156424705_+	1.902835228	5.824268985	0.048394744	Rap1gap
chr6_128888070_128888124_-	3.78604318	3.306466479	0.048461026	Clmn
chr15_85913157_85913221_+	8.143324793	2.62293451	0.048488163	Lmo7
chr4_8759602_8759690_-	2.066189439	4.767442637	0.048488163	Pmpcb
chr1_265336787_265336881_-	1.865819002	4.533514908	0.048498209	Hspa12a
chr16_20011389_20011416_+	1.824544986	8.057487152	0.048711232	Ndufa13
chr1_185974611_185974613_-	1.417642714	6.602690552	0.048852572	Aldoa
chr1_207318499_207318503_+	1.728205992	5.013375031	0.048852572	Sptbn2
chr8_48878829_48878890_-	2.9457402	3.455720714	0.04886214	Rnf214
chr10_13420667_13420738_-	1.714761587	7.341384699	0.049108246	Atp6v0c
chr10_52896057_52896059_-	2.945881644	3.456009068	0.04922357	Shisa6
chr1_235765195_235765197_-	3.753321854	3.01932722	0.049316314	Prkg1
chr1_83501166_83501168_+	1.95071181	4.641958057	0.049334842	Paf1
chr12_35300470_35300471_+	1.777703194	5.068627762	0.049489495	Atp2a2
chr1_207332189_207332247_+	1.862610391	6.033877166	0.04957314	Sptbn2
chr2_191569101_191569182_+	2.185620327	4.252335301	0.04957314	Zfp364
chr3_124019318_124019377_+	1.323853466	6.296606592	0.04957314	Plcb4
chr3_124055567_124055659_+	1.29059235	6.923610221	0.04957314	Plcb4
chr1_265316663_265316723_-	2.081673317	4.573377399	0.049732853	Hspa12a
chr17_15199203_15199227_+	8.471936135	2.531536037	0.049943113	Dbn1
chr9_36937393_36937396_+	2.260139822	6.048490086	0.0499757	Eif5b
chr10_65873159_65873252_+	2.210130215	4.810988534	0.050151573	Rab11fip4
chr19_374546_374565_-	1.828328162	4.729447254	0.050151573	Car7
chr3_43979055_43979057_+	1.396349979	7.250168764	0.050151573	Slc4a10
chr11_56282870_56282871_+	3.269690934	3.165114847	0.050222362	Plcxd2
chr13_107830795_107830797_+	2.039693456	4.198439748	0.050222362	Lpgat1
chr7_23347506_23347509_-	1.920346545	6.559420637	0.050352273	Hsp90b1
chr13_96331897_96331996_+	2.987956116	3.526098132	0.0504019	Parp1
chr13_107782486_107782487_+	8.88043566	2.752592114	0.050510932	Lpgat1
chr17_21515170_21515230_+	1.530696049	5.403289829	0.050510932	Wnk2
chr6_136495130_136495134_-	1.883925045	5.89364687	0.050685948	Bag5
chr4_149764431_149764433_-	2.147574093	4.897663519	0.050722959	Atp2b2
chr1_95071806_95071807_+	3.092905914	3.453508151	0.051080709	Kcnc3
chr11_80722050_80722115_+	1.358094465	6.69897379	0.051188295	Dgkg
chr1_157217401_157217435_-	1.875463629	6.583564331	0.051191753	Spcs2
chr16_13071943_13072011_-	3.928618885	3.151939733	0.051224533	Gcap14
chr18_64163543_64163544_-	8.278381752	2.6223656	0.051224533	Cep76
chr1_249086235_249086253_+	3.118903346	3.890721855	0.051507956	Bloc1s2
chr2_224322080_224322149_-	1.672441607	4.825993706	0.051558296	Ank2
chr6_72670998_72671089_+	3.261995861	3.136578944	0.051712413	Arhgap5
chr7_73543327_73543331_-	3.760201529	3.019359917	0.051835782	Ubr5
chr15_87112986_87113042_-	7.938823947	3.09306671	0.051957529	Fbxl3
chr1_120509069_120509139_+	1.794516487	6.531692101	0.051994941	Vimp
chr10_83078857_83078873_-	3.67806722	3.504202546	0.052001003	Cacna1g
chr10_83676619_83676620_+	7.904312046	2.630847026	0.052012869	Ppp1r9b
chr12_5804514_5804611_+	1.667471273	5.656917755	0.052041386	Hsph1
chr1_207354414_207354415_+	1.852060918	5.384650278	0.052067444	Sptbn2
chr1_201615463_201615465_-	1.44985744	6.113409552	0.052099723	Cend1
chr3_105653215_105653240_-	1.307903751	6.717032626	0.052099723	Fam82a2
chr18_32063703_32063786_+	1.692042637	4.765923794	0.052108315	Arhgap26
chr9_62229789_62229870_+	2.226984455	4.40124274	0.052593081	Adam23
chr10_64310845_64310847_-	1.689797086	6.125450964	0.052782216	Aldoc
chr18_32172817_32172853_+	2.481121371	4.010770921	0.052941969	Arhgap26
chr14_83449397_83449398_-	2.26421045	3.961251224	0.053111768	Ywhah
chr1_86171844_86171915_-	1.749572095	6.08166576	0.053206785	Scn1b
chr17_20896355_20896432_-	2.119473889	4.152068878	0.053227802	Iars
chr4_48658929_48659005_-	1.470192264	5.842214057	0.053273829	Fam3c
chr4_160650043_160650067_-	3.054272005	3.814942788	0.053390261	Clstn3
chr1_204377866_204377870_+	4.114504247	2.973006968	0.053563279	Shank2
chr12_26144177_26144219_+	2.442382157	4.526736596	0.053563279	Auts2
chr4_6734191_6734274_+	2.271214045	4.248187616	0.053563279	Pus7
chr8_62443905_62443971_+	1.616299556	6.638751027	0.053602258	Nptn
chr16_73336382_73336388_-	2.874100103	3.38610823	0.053656923	Ank1
chr6_41576080_41576081_+	2.400778498	3.681004189	0.053656923	Hpcal1
chr10_107220855_107220935_+	2.386187235	3.846296537	0.053681921	Sec14l1
chr5_156730261_156730298_+	1.773618424	5.455087076	0.053994938	Ece1
chr9_52596211_52596213_-	8.084851471	2.31346605	0.053994938	Stk17b
chr9_65829103_65829111_-	7.712619582	2.790373694	0.053994938	Lancl1
chr15_45024191_45024220_+	1.577116221	7.822639617	0.054003435	LOC691975
chr13_96317154_96317239_+	1.755520761	5.234221405	0.054047626	Parp1
chr6_80454232_80454326_+	2.634235176	3.588745526	0.054062175	.
chr5_155220695_155220780_+	2.087628485	6.112408368	0.054096746	Luzp1
chr7_27506471_27506552_+	1.600382418	5.669810374	0.054096746	Anks1b
chr17_85848573_85848596_+	2.131786585	4.996692822	0.054138988	Hspa14
chr3_12822235_12822306_-	3.012126227	3.443815203	0.054362588	Fam125b
chr1_95072132_95072135_+	1.808739694	5.436048225	0.054400513	Kcnc3
chr2_245076804_245076809_+	2.644657396	3.7159921	0.054400513	Ttll7
chr15_96049598_96049684_+	8.112928613	2.866587463	0.054497183	.
chr15_85912472_85912540_+	2.349595944	3.76583182	0.054503039	Lmo7
chr1_122384998_122385087_-	2.931944008	3.439907016	0.05462572	Lrrc28
chr9_92718588_92718672_-	1.885698543	4.486609992	0.054641195	Hdlbp
chr1_5734638_5734721_-	7.972353637	2.630642956	0.054663816	Grm1
chr14_86450363_86450447_+	1.756837565	6.405238468	0.055347605	Dbnl
chr1_53872498_53872556_+	2.371681606	3.804301986	0.055362754	1600012H06Rik
chr18_30714498_30714499_+	1.97936089	4.634897004	0.055680627	Pcdhga12
chr16_19774070_19774114_-	2.249607048	4.014030554	0.055811859	Nr2c2ap
chr17_29177308_29177360_+	2.902137695	3.5207977	0.055811859	Nedd9
chr1_80297557_80297559_-	2.453588022	4.034344819	0.055811859	Atp1a3
chr1_199339910_199339985_+	1.862821711	4.63765072	0.055849491	Inpp5a
chr13_2293945_2293948_-	2.001134589	4.038101035	0.055979602	LOC304725
chr9_19993374_19993431_+	3.173446391	3.132014422	0.055979602	Tmem14a
chr10_7055515_7055550_-	3.681092235	2.923426255	0.056169856	Abat
chr7_55589974_55590029_+	2.520329226	4.012157743	0.056169856	Ptprr
chr9_8570766_8570798_+	9.022754895	2.570926456	0.056240564	Foxp4
chr3_8982860_8982918_+	1.610044606	5.718209138	0.056356757	Sptan1
chr10_37827559_37827601_+	2.058382688	5.151002593	0.056696574	RGD1310352
chr10_52892810_52892812_-	3.635480585	2.944631228	0.056788014	Shisa6
chr8_71352616_71352618_-	3.254813131	3.644185546	0.05700658	Tpm1
chr4_64371468_64371508_-	3.646866755	2.91932695	0.0570368	Dgki
chr6_71795282_71795289_-	2.290360533	3.681153328	0.0570368	Strn3
chr7_10816387_10816390_+	1.463823568	6.297877097	0.057097435	Uqcr11
chr7_9886689_9886787_-	1.991745089	4.320922849	0.057097435	Pip5k1c
chr12_32333171_32333206_+	1.340269349	7.151177805	0.057177484	Ubc
chr12_26139675_26139737_+	3.694731023	3.031686254	0.057548851	Auts2
chrX_56589239_56589317_-	1.442377552	5.202137364	0.057591856	Map7d2
chr18_56919774_56919822_+	1.900492153	4.767907579	0.057760238	CAMK2A
chr8_73802363_73802364_+	8.108600337	2.665276229	0.057832654	Rora
chr13_78400600_78400682_-	1.704810804	6.015644571	0.057973066	Prrc2c
chr6_26343661_26343663_+	2.395243651	4.3480895	0.058120972	Kif3c
chr1_205941219_205941229_-	2.429834572	3.938208972	0.058174916	Gal
chr13_82141495_82141562_-	3.810750656	3.149346088	0.058174916	Pogk
chr4_160662193_160662194_-	8.36965063	2.802975973	0.058174916	Clstn3
chr18_32323586_32323651_+	2.571433783	3.530626418	0.058350374	Arhgap26
chr16_19425356_19425403_+	1.511094208	8.335323222	0.058466706	Uba52
chr13_68735995_68735997_+	2.027357445	4.88478048	0.058611059	Rgs8
chr5_58100798_58100801_+	2.012807344	7.365748558	0.059150518	Dnaja1
chr19_9813037_9813054_-	2.838370363	3.898884016	0.059162967	Ndrg4
chr7_124157947_124158045_-	1.480346479	6.310560296	0.059162967	Cerk
chr10_16816018_16816093_-	8.308386902	2.378830025	0.059188338	Ergic1
chr13_98249619_98249692_-	1.755697446	5.639100868	0.059194546	Degs1
chr19_11622634_11622647_-	1.482941012	6.075005902	0.059194546	Gnao1
chr9_36318972_36319049_+	1.728313179	5.220802844	0.059194546	Inpp4a
chr6_41576110_41576117_+	2.098432378	4.687819816	0.05924644	Hpcal1
chr11_68374602_68374687_+	2.59154495	3.543373422	0.0595779	Kalrn
chr3_46834041_46834107_-	2.065836674	4.660042912	0.059689631	Grb14
chr8_32011844_32011939_+	2.206872504	4.265157123	0.059858314	Arhgap32
chr12_23517423_23517502_+	3.066583934	3.44917376	0.060005196	Gtf2i
chr15_60916250_60916309_-	8.884294095	2.737563637	0.060138554	Lect1
chr1_267477190_267477282_-	3.742758469	2.765852476	0.060145399	Prdx3
chr17_89062958_89062988_+	2.130147789	3.851184544	0.060145399	Cacnb2
chr6_101943314_101943364_-	2.134054669	7.443991781	0.060168119	Vti1B
chr11_51555833_51555882_+	2.497491017	4.754938341	0.060183239	Bbx
chr1_199383198_199383244_+	1.834327917	4.581249928	0.060183239	Inpp5a
chr5_169534942_169534943_+	8.885215879	2.737913824	0.060204422	Icmt
chr14_81292682_81292685_+	1.832911298	6.805156128	0.060315449	Lrpap1
chr4_79836486_79836544_+	2.764560317	3.588211951	0.060458241	Snx10
chr9_62219646_62219667_+	1.978164848	4.380355164	0.060460498	Adam23
chr3_44252925_44252938_+	1.731511558	5.147853256	0.060470572	Slc4a10
chr4_26908222_26908238_-	7.062268669	3.484569484	0.060470572	Akap9
chr1_95071665_95071666_+	1.932044557	4.259211745	0.06049706	Kcnc3
chr18_48712540_48712617_+	1.637965373	5.591523843	0.06057427	Snx24
chr5_72912469_72912555_+	2.344624895	3.770122723	0.060937892	Zfp462
chr9_1973519_1973523_-	2.10763375	4.203945949	0.061043975	.
chr4_160657775_160657839_-	2.018415305	4.89686209	0.061062378	Clstn3
chr10_64309460_64309461_-	2.927708621	3.253589341	0.061116452	Aldoc
chr6_10415037_10415051_+	3.445014032	3.192361189	0.061116452	Rhoq
chr8_67777247_67777300_+	2.191748847	4.335587174	0.061237808	Aagab
chr10_38892519_38892581_-	1.720773451	7.694263083	0.061257134	Uqcrq
chr1_95078679_95078681_+	1.689702439	5.375519498	0.061380261	Kcnc3
chr3_8997825_8997844_+	2.134214253	4.416009021	0.061413776	Sptan1
chr3_75263360_75263454_-	1.793102963	5.979357179	0.06147535	Ndufs3
chr3_8990080_8990142_+	1.508087606	6.046672182	0.061583934	Sptan1
chr3_156007277_156007324_+	2.618932379	3.749816039	0.061765232	Slc12a5
chrX_55909288_55909325_+	1.654813726	4.768867297	0.061770224	Pdha1
chr6_3276856_3276909_+	2.448864456	3.827859766	0.06184193	RGD1560224
chr10_56624104_56624107_-	2.01077521	4.904286147	0.061862553	Fgf11
chr3_76321697_76321736_-	2.232244353	4.572526271	0.061862553	Dgkz
chr17_21597448_21597526_+	1.867350326	4.428073835	0.06187772	Wnk2
chr2_26554997_26555010_-	6.845589627	3.469626276	0.061944603	Sv2c
chr9_36319544_36319619_+	1.660941431	5.120156423	0.061944603	Inpp4a
chr5_165239113_165239115_+	1.854837174	6.17862989	0.06194619	Fbxo2
chr8_112468825_112468879_-	3.181384799	3.022862653	0.062012825	Dock3
chr4_25043609_25043705_+	3.163177755	3.144774452	0.062163908	Steap2
chr9_10078399_10078488_-	1.743662198	6.44800842	0.06231385	Ppp2r5d
chr10_46051015_46051018_+	2.139336998	4.208717463	0.062595937	Mprip
chr6_41569872_41569873_+	2.882869145	3.345679583	0.062956633	Hpcal1
chr14_84470587_84470631_-	3.71589483	3.003908801	0.062982069	Osbp2
chr2_105353682_105353736_-	2.187741614	4.677071611	0.063135516	LOC680559
chr3_63493875_63493965_+	1.8526031	4.920383042	0.063161604	Nup35
chr3_48364137_48364194_-	1.318395169	7.224911118	0.063215061	Scn1a
chr3_56144583_56144585_-	1.562582544	5.218777143	0.063297417	Chn1
chr1_64145981_64145983_-	2.043345291	4.205129368	0.063310164	Prkcg
chr10_15330858_15330859_-	1.814276389	4.692758732	0.063599526	Nme4
chr10_83068714_83068715_-	8.564727956	2.872905337	0.063636256	Cacna1g
chr10_53051585_53051683_-	1.955506427	4.673142502	0.063717591	Shisa6
chr3_155508552_155508554_+	1.793794228	4.841237433	0.063763203	Dbndd2
chr4_37879573_37879574_-	2.464782886	3.656721247	0.063763203	Thsd7a
chr10_72793177_72793191_-	1.724758749	5.825711346	0.063823132	Aatf
chr10_64607472_64607504_-	2.4391457	3.878749986	0.063949995	Sarm1
chr1_158884553_158884586_+	8.201286927	2.607290298	0.063949995	Arap1
chr4_160658750_160658827_-	2.063624115	8.813173319	0.063949995	Clstn3
chr1_265330622_265330697_-	2.960336286	3.676164902	0.064059637	Hspa12a
chr1_149207683_149207731_+	1.397514976	5.866196568	0.064066323	Dlg2
chr10_67725375_67725431_+	1.327575717	5.677864587	0.064113516	Abr
chr1_137553963_137553965_-	8.61436828	2.479345689	0.064118818	Rps17
chr5_22048498_22048499_-	1.690542683	4.72037536	0.064179796	Car8
chr9_47194563_47194624_+	1.56577366	5.239474896	0.064179796	Nabp1
chr3_158248056_158248063_-	3.587055381	3.301103023	0.064331091	Znfx1
chr18_32069613_32069685_+	1.714491012	4.875650747	0.064579909	Arhgap26
chr1_65501666_65501670_+	1.8236112	7.863800554	0.064942471	Peg3
chr12_11178159_11178219_-	2.175935755	3.948252297	0.064963124	Cyth3
chr19_41658830_41658831_-	3.72909229	2.783227867	0.064980535	Bcar1
chr1_207727416_207727489_-	1.88867125	6.003202511	0.065078096	Rab1b
chrX_122139081_122139083_+	2.055523115	4.625801168	0.065078096	Armcx4
chr14_80574088_80574181_-	2.240830569	4.033682483	0.065094462	Ablim2
chr8_74556748_74556827_-	1.720935541	4.949886618	0.065094462	Fam81a
chr3_43979103_43979104_+	3.102291338	3.451380396	0.065258803	Slc4a10
chr10_10918102_10918186_-	1.555959186	5.402711785	0.065267991	Hmox2
chr1_149272566_149272632_+	1.508303348	6.337492139	0.065514065	Dlg2
chr10_40405791_40405821_-	2.207450528	3.954142587	0.065826309	Anxa6
chr3_89731345_89731445_-	8.283833021	2.368284788	0.065826309	D430041D05Rik
chr1_212740832_212740834_-	3.815051351	3.151618645	0.065915349	Dagla
chr9_105503298_105503329_-	2.106095047	4.00493962	0.0659175	Soga2
chr19_53742642_53742652_+	1.675161163	6.676030688	0.066039108	Tubb3
chr1_204377930_204377937_+	3.725924929	2.823379644	0.066113337	Shank2
chr10_95461966_95462014_+	3.069065047	3.410667894	0.066128891	Taco1
chr17_96259399_96259486_+	1.7095785	5.997902863	0.066128891	Gad2
chr11_63912366_63912461_+	2.273745673	3.952288838	0.066151451	Arhgap31
chr6_6861616_6861650_-	1.427644292	7.508837802	0.066151451	Cox7a2l
chr15_103917051_103917142_+	2.013110516	4.383646551	0.06623338	Dnajc3
chr13_95349840_95349886_+	1.997428591	6.053319973	0.066309281	Sccpdh
chr10_63725895_63725990_+	2.39210382	8.504051976	0.066374593	LOC687994
chr13_73650668_73650712_+	1.989243195	4.967149475	0.066385736	Astn1
chr17_89075905_89075998_+	3.894479661	2.889342121	0.066403449	Cacnb2
chr4_143862702_143862704_+	1.253442826	6.759456204	0.066417862	Itpr1
chr10_16514336_16514405_+	3.550161721	3.331799152	0.066423516	Stc2
chr10_83045861_83045876_-	3.019011712	3.498254727	0.066423516	Cacna1g
chr1_95074436_95074437_+	2.270199184	3.900211395	0.066423516	Kcnc3
chr4_182663243_182663244_-	2.12585228	4.282052958	0.066488784	Bcat1
chr2_94886845_94886888_+	1.865561424	5.430247817	0.066676765	Mrps28
chrX_34292543_34292561_-	1.684556362	5.387298959	0.066679088	Rps26
chr13_87137503_87137505_-	2.090587405	4.154005478	0.067292527	Ndufs2
chrX_56624429_56624481_-	2.123241254	4.354780859	0.067356229	Map7d2
chr7_57162174_57162243_-	7.142672176	3.421792175	0.067476077	Rap1b
chr1_207357044_207357045_+	2.029447413	4.148362468	0.067735464	Sptbn2
chr19_25191755_25191758_-	1.790518015	4.495168692	0.067766244	Cacna1a
chr4_143705437_143705439_+	2.109059933	4.429659333	0.067766244	Itpr1
chr5_73256704_73256715_+	7.12913914	3.42162981	0.067766244	Rad23b
chr6_110047538_110047609_+	1.784702	5.217826462	0.067776848	RGD1563583
chr3_170449592_170449658_-	2.007650659	4.805363839	0.067861418	Stmn3
chr19_37084061_37084109_-	3.553919517	3.012945745	0.067975847	LOC364998
chr19_25271082_25271084_-	2.031076305	3.967137955	0.068166101	Cacna1a
chr7_2184160_2184162_-	1.907770468	4.367411869	0.068187218	Gdf11
chr12_36301785_36301870_+	1.992408952	4.627706087	0.068995321	Trafd1
chr12_35267170_35267171_+	1.999805438	3.92468346	0.069154324	Atp2a2
chr14_83449353_83449355_-	1.558671315	5.577165651	0.069220418	Ywhah
chr10_64309805_64309806_-	3.668854464	2.810224322	0.069247533	Aldoc
chr2_123183857_123183926_-	2.235097162	3.669566008	0.069294238	Trpc3
chr5_63259329_63259330_-	3.656594359	2.845139161	0.069303665	Gabbr2
chr10_40326389_40326487_-	1.702918177	4.589514283	0.069390781	Tnip1
chr1_8012014_8012040_-	3.588210735	3.014821125	0.069407211	Phactr2
chr1_122479293_122479294_-	2.98605798	3.170914631	0.069467589	Synm
chr3_59892082_59892170_-	1.346988107	6.620350328	0.069584003	Sestd1
chr9_83716857_83716859_-	1.633751214	4.793768041	0.069954618	Dner
chr17_26725382_26725481_-	7.652454864	3.081418559	0.070181188	Cd83
chr12_21884842_21884848_+	1.362618482	6.245487269	0.070237442	Ywhag
chr10_35344745_35344798_+	3.563855499	3.177031423	0.070493819	Mapk9
chr2_83282011_83282110_+	3.494024374	3.453621842	0.070840218	Dap
chr19_26573530_26573535_-	1.612048649	4.902301108	0.070899088	Tbc1d9
chr4_143870661_143870662_+	1.405980145	5.655504736	0.07095044	Itpr1
chr1_233053587_233053624_+	2.471228419	3.845793679	0.070987208	Cd274
chr19_25377215_25377292_-	2.195241222	4.000105279	0.071113251	Cacna1a
chr1_212739503_212739589_-	2.877679015	3.580871173	0.07131976	Dagla
chr8_111573430_111573485_+	1.389767607	5.866231064	0.071592999	Rpl29
chr8_32018003_32018077_+	1.989171325	4.210880966	0.071592999	Arhgap32
chr1_204836382_204836481_+	2.362130885	3.975843171	0.071708895	Shank2
chr6_110014006_110014074_+	2.094386276	3.842728197	0.072222541	RGD1563583
chr10_59866414_59866421_+	2.700796365	3.742049301	0.072338403	Atp2a3
chr1_204854459_204854460_+	2.168467296	4.983910134	0.072393222	Shank2
chr3_3389497_3389502_-	1.664884658	5.473476214	0.072393222	Tubb4b
chr3_149496846_149496848_+	2.345629054	4.026891048	0.072894592	Ppp1r16b
chr6_7993522_7993579_+	1.798009693	6.373332158	0.072899195	Dync2li1
chr9_92705973_92706050_-	1.489361978	5.899056946	0.073000132	Hdlbp
chr1_201617302_201617373_-	1.533352796	8.766823516	0.073124067	Cend1
chr17_88982659_88982739_+	2.123815672	4.535603652	0.073124067	Cacnb2
chr10_55571014_55571017_+	3.106213344	3.245456702	0.073339138	Myh10
chr3_118295153_118295162_-	1.754075248	7.011248605	0.073339138	Ddrgk1
chr14_17557127_17557187_+	1.920186461	5.53858869	0.073519815	G3bp2
chr10_93471322_93471360_+	3.192619993	3.229395056	0.073557409	Mapt
chr11_63927990_63927992_+	4.092145857	2.768026131	0.073557409	Arhgap31
chr3_147163879_147163881_+	3.781810437	2.883617308	0.073557409	Dlgap4
chr12_25518247_25518314_+	2.236492414	3.763121607	0.073592486	Auts2l
chr13_85540182_85540192_-	1.588781884	5.732527662	0.073592486	Rgs4
chr6_104457666_104457667_+	3.192757503	3.229357164	0.073653333	Plekhd1
chr2_203895793_203895835_+	3.632562078	2.658265138	0.073659818	Sort1
chr1_265310339_265310415_-	2.691576134	3.442886298	0.073698802	Hspa12a
chr6_136454281_136454282_-	3.632584555	2.658343968	0.073698802	Ckb
chr2_62345140_62345142_+	8.436922235	2.495624254	0.073699736	Drosha
chr2_155066017_155066033_+	3.183711114	3.264577293	0.073836167	Kcnab1
chr15_18597989_18597991_+	2.030964416	6.525972809	0.073906715	Fam107a
chr18_28984354_28984357_+	2.52782413	3.645496211	0.074027602	Cystm1
chr14_9078418_9078493_-	1.877336302	4.770519668	0.074068258	Cds1
chr10_76500592_76500653_+	2.294618266	3.754081497	0.074195569	Mrps23
chr14_49728749_49728788_+	4.094077629	2.768109532	0.074665979	LOC501396
chr1_158885431_158885434_+	7.81552651	2.618005283	0.074694671	Arap1
chr13_108986964_108986967_+	7.815685005	2.618003902	0.074694671	Irf6
chr2_53943812_53943893_+	1.895601322	4.587615439	0.074694671	LOC100359544
chr3_147163820_147163822_+	2.510897886	3.646579737	0.074694671	Dlgap4
chr5_49503881_49503948_+	2.294164364	3.672248958	0.074694671	Srsf12
chr8_20809041_20809114_+	1.581346954	5.131603319	0.074694671	Smarca4
chr2_219409466_219409467_+	4.090004333	3.192791924	0.074702584	Pde5a
chr14_102264579_102264672_-	1.460412773	5.980155093	0.074836391	Mdh1
chr2_224295931_224295999_-	1.625242315	4.516692558	0.074913587	Ank2
chr9_62222829_62222907_+	1.212749577	6.947101096	0.07515931	Adam23
chr2_157283046_157283135_+	1.766592246	5.586923516	0.075181728	Gfm1
chr2_190663827_190663884_-	1.864715625	4.438378951	0.075181728	RGD1566380
chr6_126832142_126832225_+	3.581543167	2.987939147	0.075181728	Chga
chr9_90352229_90352317_+	8.116709078	2.734854688	0.075314643	Lrrfip1
chrX_3533425_3533493_-	2.435394553	3.668358317	0.075558842	Gria3
chr11_75360536_75360632_-	2.201445087	6.641115797	0.07571542	Ccdc50
chr4_163015539_163015543_-	1.975654814	4.491277555	0.075840913	Kcna1
chr5_169530396_169530397_+	2.874060116	3.225483081	0.075899294	Icmt
chrX_70326949_70327043_+	1.574162891	5.345388621	0.075988959	Dmd
chr10_40439638_40439719_-	1.716849576	5.388754905	0.0760316	Anxa6
chr8_50765782_50765791_+	7.002467734	3.336021894	0.0760316	Cadm1
chr2_192539667_192539754_-	1.926506635	4.673924906	0.076309072	Pde4dip
chr6_73101340_73101342_+	2.142871255	3.958253933	0.076309072	Akap6
chr1_213390537_213390558_+	7.168576626	3.250844777	0.076316109	Prpf19
chr10_5055855_5055953_-	2.220634584	3.886627203	0.076361017	Clec16a
chr10_83044193_83044195_-	2.517095754	3.371602637	0.076365828	Cacna1g
chr7_96096155_96096156_+	3.027573388	3.56539147	0.076368103	Sqle
chr4_185678114_185678116_+	2.766165132	3.348739333	0.076545829	Far2
chr10_87582869_87582879_+	2.344994422	3.665470837	0.076591775	Casc3
chr3_75963592_75963666_+	1.683410323	4.730577683	0.076618295	Ckap5
chr19_11623032_11623035_-	1.830330686	4.399378862	0.076760862	Gnao1
chr3_104910293_104910295_-	2.254670378	4.228672033	0.076760862	Srp14
chr2_140456543_140456546_-	2.578997654	3.75893611	0.076800285	Setd7
chr6_72685269_72685271_+	8.942593235	2.375330986	0.076800285	Arhgap5
chr2_181265828_181265896_+	8.624778064	2.473267119	0.076919279	Fam189b
chr7_27866038_27866044_+	2.110998835	4.258502497	0.076919279	Anks1b
chr9_105846574_105846642_-	3.374577647	3.072406992	0.076927782	Ptprm
chr2_30508247_30508250_-	1.451787459	6.592060161	0.076956691	Map1b
chr10_4977361_4977452_-	3.744343573	2.861175806	0.077234424	Clec16a
chr1_64172497_64172498_-	3.035403123	3.685972531	0.077472947	Prkcg
chr10_46051046_46051047_+	8.173262629	2.41296367	0.077522529	Mprip
chr10_67691291_67691358_+	1.870071808	5.624900265	0.077591026	Abr
chr1_204883469_204883549_-	1.602878312	4.869618619	0.077591026	Cttn
chr7_74189462_74189468_-	1.162837839	7.158696457	0.077591026	Azin1
chr13_1344046_1344128_-	2.603677309	4.086512446	0.077657261	LOC304725
chr5_127418066_127418147_+	2.230564533	3.777092849	0.077657261	Usp24
chr4_62924212_62924297_-	1.718694514	6.841208333	0.077669475	Mtpn
chr9_106325688_106325777_-	3.60520042	2.851869218	0.077710221	Ptprm
chr12_8719686_8719737_-	2.036096451	5.177458085	0.077864958	RGD1562469
chr3_149491163_149491164_+	8.070559333	2.721534941	0.077864958	Ppp1r16b
chr10_18564254_18564293_-	3.568697731	2.789125514	0.077904074	Kcnip1
chr13_107834072_107834167_+	1.886485323	4.173669763	0.078135809	Lpgat1
chr14_110771095_110771113_+	1.576095649	5.08142251	0.078141075	Rtn4
chr16_69225787_69225863_+	3.569006288	2.789362655	0.078150701	Rab11fip1
chr4_160631193_160631194_-	2.533015275	3.604893193	0.078150701	Clstn3
chr7_10319946_10319950_+	1.673510123	5.529187311	0.078178485	Timm13
chr1_135242837_135242863_+	1.596619029	5.015609395	0.078349447	MP68
chr3_3493752_3493793_+	1.536181404	5.934430698	0.07844834	Man1b1
chr7_95820051_95820092_+	3.987090632	2.76037103	0.078471488	Mtss1
chr4_37635467_37635551_-	2.967410437	3.238360269	0.078623457	Thsd7a
chr5_35477165_35477191_-	7.966039566	2.729063867	0.078623457	Nkain3
chr2_192603597_192603688_-	1.841957645	4.670233007	0.07863216	Pde4dip
chr10_5002194_5002288_-	3.639781111	3.051726538	0.078633176	Clec16a
chr8_20788559_20788606_+	2.679753641	3.484914943	0.078633176	Smarca4
chr11_85609846_85609885_-	2.419785742	4.244480124	0.078633842	Snap29
chr1_42307799_42307885_+	1.851095335	4.342837058	0.078633842	Igf2r
chr20_1577476_1577477_-	3.656581931	2.686105555	0.078633842	Gabbr1
chr9_106079676_106079728_-	1.630519489	4.990918777	0.078633842	Ptprm
chr15_59891420_59891453_-	3.669257812	2.682876192	0.078680314	.
chr3_158575184_158575274_+	1.442612211	5.743041794	0.078680314	Slc9a8
chr12_11536743_11536827_-	2.122530522	3.953143284	0.078786124	Grid2ip
chr10_61707011_61707073_-	3.586126499	2.775391356	0.07882735	Rap1gap2
chr10_64312373_64312374_-	2.249124036	3.773259255	0.07882735	Aldoc
chr14_79122284_79122334_-	2.218549857	4.254673634	0.07882735	Crmp1
chr10_55572112_55572193_+	1.312206621	6.167447611	0.078848029	Myh10
chr3_98090278_98090279_+	8.840087325	2.44760749	0.078884163	Lpcat4
chr9_8770393_8770438_+	1.868697684	7.448489736	0.078884163	Tomm6
chr6_115440874_115440922_-	3.574584504	3.055058991	0.078991372	Sel1l
chr9_9911685_9911779_+	3.441235907	3.181646768	0.078991372	.
chr3_89518821_89518921_-	1.256984974	6.863507715	0.07929442	D430041D05Rik
chr10_55545287_55545327_+	1.996145334	4.409050828	0.079339228	Myh10
chr1_212733995_212733998_-	1.840013315	5.30524215	0.079339228	Dagla
chr1_84189641_84189687_-	2.682229987	3.699770468	0.079355634	RYR1
chr1_122483422_122483465_-	3.198520209	3.348076138	0.079558707	Synm
chr20_11975942_11975990_+	2.990622692	3.475006658	0.079771569	Col18a1
chr3_147266923_147266926_+	2.943840415	3.543529306	0.079771569	RGD1307752
chr1_167373787_167373858_-	7.022820303	3.293838205	0.079808859	Tmem9b
chr15_47638862_47638863_+	1.910237937	4.229680882	0.079929541	Nefl
chr1_212930921_212931002_+	1.394380532	6.241629475	0.080313663	Syt7
chr14_7017081_7017092_-	8.240685747	2.355582621	0.080415513	Aff1
chr3_8984892_8984965_+	1.290671461	6.345125814	0.080415513	Sptan1
chr10_82584574_82584658_-	1.184547541	6.714025359	0.0808631	Nme2
chr18_63723158_63723185_+	3.742624317	3.375255751	0.0808631	Gnal
chr7_11515048_11515078_-	1.923606358	6.35573994	0.0808631	Bsg
chr9_71306325_71306388_-	8.201454653	2.590996314	0.081106524	Mreg
chr1_94834653_94834662_+	3.641244887	2.892981521	0.081107209	Shank1
chr1_149249672_149249690_+	1.305370457	5.681370021	0.081262336	Dlg2
chr12_23212645_23212658_-	1.956666448	4.173708543	0.081331114	LOC363906
chr3_105656693_105656725_-	3.091335641	3.710839821	0.081331114	Fam82a2
chr1_199374324_199374382_+	1.525441767	5.982001404	0.081356543	Inpp5a
chr1_207344746_207344747_+	3.29123786	3.388210451	0.081494109	Sptbn2
chr12_26820635_26820721_-	2.624955124	4.239325381	0.081494109	.
chr1_95078967_95078968_+	2.264131272	4.108064001	0.081494109	Kcnc3
chr15_655582_655664_+	3.13810952	3.287994108	0.081639619	Kcnma1
chr7_119728975_119729034_-	2.223154374	7.731485297	0.081639619	St13
chr5_130345846_130345894_+	1.990354744	7.307374372	0.081644372	Nrd1
chr10_63884673_63884760_+	1.586119325	4.90288235	0.081749729	Myo18a
chr8_58135354_58135435_+	1.872071611	8.042971994	0.081749729	Idh3a
chr1_251498416_251498482_+	8.124465148	2.311354459	0.08189996	Gbf1
chr13_57605559_57605657_-	1.600745801	6.209757973	0.081992704	Trove2
chr1_29769933_29770011_+	1.947199764	5.306869863	0.08200464	Pdcd6
chr1_95067389_95067390_+	8.205854552	2.357361402	0.082040535	Kcnc3
chr13_68768277_68768281_+	1.38194898	5.495333365	0.082095288	Rgs8
chr7_95808537_95808538_+	7.346568388	2.752930796	0.082095288	Mtss1
chr15_47638981_47638982_+	1.924638453	4.104501812	0.082259973	Nefl
chr14_37276293_37276294_+	3.76184779	2.924573811	0.08228891	Ociad2
chr10_35686748_35686831_+	1.920290089	5.296635248	0.082584141	Tbc1d9b
chr3_117897624_117897651_-	1.849716445	5.865453508	0.082584141	Idh3B
chr6_26379062_26379135_+	1.397114486	5.09502577	0.082651782	Kif3c
chr10_92850279_92850370_-	1.489195101	7.005528298	0.082783175	Gosr2
chr13_2293734_2293737_-	1.378168794	5.337111594	0.082814523	LOC304725
chr4_160631474_160631475_-	2.507157241	3.809790749	0.082834203	Clstn3
chr13_79608876_79608957_+	1.945031497	4.216898608	0.082922296	Kifap3
chr9_13640308_13640377_-	1.79505777	4.702049938	0.082922296	Tnfrsf21
chr2_123121040_123121092_-	1.49927441	6.598234285	0.083283523	Trpc3
chr4_180853195_180853261_-	3.37627962	3.039357983	0.083290721	St8sia1
chr3_3471843_3471914_-	1.778074635	5.471758237	0.083314368	Grin1
chr17_16636483_16636538_-	1.725674119	5.647191437	0.083968761	Sfxn1
chr10_64310409_64310410_-	1.434155859	5.160336294	0.08407107	Aldoc
chr11_45072412_45072490_-	7.500756703	2.752071572	0.08407107	Abi3bp
chr1_84228414_84228431_-	8.25114588	2.448122951	0.084100145	RYR1
chr1_5330236_5330292_-	2.367197904	3.939350167	0.084106344	Grm1
chr10_83095548_83095549_-	3.639498971	2.866767136	0.084494396	Cacna1g
chr1_251611023_251611123_-	1.245652078	6.701988735	0.084494396	Actr1a
chr10_55561378_55561466_+	1.628470973	7.888172659	0.084516615	Myh10
chr1_95078905_95078910_+	1.651795167	6.484612936	0.084726208	Kcnc3
chr9_108420424_108420518_+	1.34486571	5.731383778	0.084977776	Epb41l3
chr12_26159160_26159192_+	8.107102431	2.436175596	0.085185683	Auts2
chr7_120729918_120729942_-	1.850132864	7.014882357	0.085185683	Ndufa6
chr16_19190505_19190506_-	4.246650482	2.958739571	0.085260879	Rab3a
chr4_143876913_143876914_+	1.560419839	5.676550193	0.085260879	Itpr1
chr8_44568149_44568186_+	1.25115169	7.14082428	0.085260879	.
chr2_105348695_105348726_-	1.203946136	6.654072756	0.085321727	LOC680559
chr13_102818225_102818236_-	7.878430201	2.707347755	0.085364141	Tgfb2
chr2_203706247_203706268_-	2.51512498	4.815877878	0.085528049	Gnai3
chr12_46715532_46715606_+	3.646070482	2.878397019	0.085731734	LOC100365270
chr4_117989879_117989960_+	1.46966057	5.28040572	0.085731734	Nagk
chr3_52912069_52912159_+	7.881029256	2.707092291	0.085949005	Gorasp2
chr10_76052568_76052570_+	1.638253757	4.835380144	0.086035426	.
chr5_146166814_146166910_-	1.977821929	7.921165323	0.086305744	Ncdn
chr7_129370234_129370279_-	2.594003533	3.662370753	0.086305744	Kif21a
chr10_46074452_46074453_+	3.476315883	2.880343551	0.086543245	Mprip
chr4_160659404_160659405_-	8.179987884	2.723028673	0.086551864	Clstn3
chr10_16257740_16257824_+	2.025305866	4.043613824	0.086660596	BOD1
chr1_72885667_72885763_+	2.076752995	4.30290947	0.086781224	Ube2m
chr15_23250716_23250783_+	1.829347062	5.404940909	0.086793071	Mapk1ip1l
chr16_1955670_1955678_+	7.133358292	3.310314075	0.086793071	Arf4
chr2_77240230_77240307_+	3.789146925	3.1023584	0.086845507	Myo10
chr3_56156318_56156368_-	1.788055194	4.462330984	0.086912403	Chn1
chr2_219483291_219483371_+	1.892087014	4.34722061	0.087171121	Pde5a
chr9_11033438_11033448_+	1.812788789	7.911755786	0.087171121	Hsp90ab1
chr4_37689901_37689975_-	2.871278879	3.090713684	0.087251253	Thsd7a
chr9_77799938_77799939_+	3.24722558	3.332373012	0.087295784	Sgpp2
chr5_74879619_74879678_-	1.366260371	6.312974614	0.087435471	Frrs1l
chr2_79800639_79800684_-	1.570459509	4.534432968	0.087466755	Trio
chr12_35303082_35303155_+	1.358560798	9.547808093	0.087474566	Atp2a2
chr5_136049362_136049405_+	7.080590053	3.374418923	0.087474566	Atpaf1
chr9_35625464_35625465_+	1.725033044	4.555631989	0.087778401	Cox5b
chr5_63259215_63259216_-	1.995117737	4.374339219	0.087845579	Gabbr2
chr10_57486343_57486344_+	1.721011773	4.428053085	0.087948864	Mink1
chr20_1577508_1577509_-	1.768989519	4.936952438	0.087951971	Gabbr1
chr8_124895106_124895179_-	2.342354723	4.160588473	0.087951971	Gorasp1
chr8_34992156_34992248_+	1.861002787	6.053809282	0.087951971	Srpr
chr12_36230092_36230097_+	1.808936295	4.599139458	0.088021003	Erp29
chr2_118946473_118946543_+	1.614730386	6.375599741	0.088400048	Ndufb5
chr16_7833627_7833695_+	2.418775775	3.529782881	0.088408843	Ogdhl
chr8_112762554_112762616_+	2.069390413	4.187485721	0.088580151	Cacna2d2
chr10_89948258_89948350_+	2.136788126	8.350405779	0.088619746	Atp6v0a1
chr5_156996659_156996713_+	2.600605992	7.756314272	0.088843215	Hp1bp3
chr1_107439930_107439943_+	6.988311854	3.243250384	0.089075177	Herc2
chr18_27234258_27234302_+	1.715653689	5.220061159	0.089075177	Fam53c
chr6_73273312_73273367_+	1.74054693	5.900118113	0.089075177	Akap6
chr9_62206115_62206139_+	2.387837882	3.587763355	0.089075177	Adam23
chr18_28619790_28619822_+	2.456138156	3.438106721	0.089454661	Psd2
chr3_118865446_118865505_-	6.999942168	3.243145485	0.089454661	RGD1311739
chr16_47946740_47946805_+	2.536708642	4.455355963	0.089577505	Trappc11
chr7_54863252_54863347_-	1.739542123	4.457137598	0.089577505	.
chr11_31920624_31920724_-	1.27826607	7.584013271	0.089615	Atp5o
chr11_28106355_28106368_-	2.588499844	3.601994211	0.089853535	Grik1
chr3_170235342_170235434_-	2.391958202	3.954622355	0.089853535	Kcnq2
chr8_43277735_43277788_-	8.607160331	2.537874562	0.089894127	Gramd1b
chr9_109748327_109748341_+	2.254764088	3.880188464	0.089933043	Dlgap1
chr1_94794512_94794527_+	1.978134851	4.450249308	0.090208113	Shank1
chr3_40856982_40856985_-	8.602804669	2.506642809	0.09028628	Ccdc148
chr5_169612041_169612140_+	1.559495584	5.681624208	0.090318796	Chd5
chr15_715065_715131_+	2.168340765	4.099280151	0.090343204	Kcnma1
chr10_92375756_92375837_+	1.77319559	4.164308389	0.090369372	Fmnl1
chr3_147163951_147163952_+	2.153878408	3.883466723	0.090369372	Dlgap4
chr4_160876902_160876905_+	7.637929927	2.698856144	0.090369372	.
chr19_12214836_12214839_-	2.435952446	3.974996743	0.09057648	Large
chr16_81437335_81437413_-	1.601487539	5.510605533	0.090609782	Mcf2l
chr14_101628859_101628907_-	8.623397504	2.434333464	0.090728914	.
chr1_95481064_95481070_-	3.438126049	2.961480459	0.0910764	Scaf1
chr1_2255892_2255910_+	3.628892384	2.676370501	0.091255508	Lrp11
chr19_22561753_22561755_+	6.910724018	3.24912089	0.09139636	Itfg1
chr10_5031668_5031755_-	1.237044777	6.327991495	0.091491153	Clec16a
chr3_75523517_75523576_-	1.752020502	4.53355662	0.091675649	Madd
chr7_10176663_10176665_+	8.618100042	2.538166186	0.091675649	Diras1
chr6_2733583_2733630_-	1.966570917	4.467004716	0.091717463	Atl2
chr3_116818826_116818893_+	2.015152751	4.343004515	0.091742809	Slc20a1
chr8_44979391_44979412_-	2.980277018	3.501119602	0.091742809	Sorl1
chr7_128990775_128990821_-	1.807765011	4.461116008	0.091759827	Cpne8
chr15_38802395_38802455_-	2.884878509	3.609586456	0.09182244	LOC691889
chr1_63836818_63836864_-	1.283128468	6.181665406	0.091845406	Tsen34
chr1_212876746_212876829_+	2.208902937	3.675312092	0.091954161	Syt7
chr20_3727954_3727958_+	7.045482981	3.267681268	0.091954161	Prrc2a
chr7_55570898_55570954_+	1.633961894	4.87978555	0.091954161	Ptprr
chr12_22034215_22034257_-	1.960357215	8.165082268	0.092257025	Mdh2
chr1_250726888_250726952_-	4.013590425	2.783039278	0.093305411	Poll
chr10_31333753_31333821_-	1.835226694	4.126817294	0.093461524	Cyfip2
chr16_7689237_7689275_-	2.006397356	7.319104431	0.093557442	Timm23
chr14_70604404_70604481_+	3.484440948	3.376704893	0.093701842	Fam184b
chr2_77309406_77309489_+	2.351609783	4.323419389	0.093701842	Myo10
chrX_89376165_89376210_+	1.498184246	5.555659518	0.093701842	Nlgn3
chr15_47699271_47699272_-	1.381034213	5.969243106	0.093875417	Nefm
chr2_147072527_147072589_-	1.932469235	6.717806562	0.093875417	Pfn2
chr12_28206893_28206960_-	2.867522661	3.010929851	0.093934926	SFSWAP
chr9_71335568_71335586_-	3.145081763	3.107649658	0.093934926	Mreg
chr4_143898551_143898552_+	1.96750135	3.985499538	0.09416202	Itpr1
chr4_48630136_48630232_-	1.496644127	5.945652335	0.094168475	Fam3c
chr1_211640893_211640934_+	1.572506785	5.439300611	0.094324665	Eef1g
chr18_31937504_31937518_+	8.869806002	2.306693399	0.094409351	Arhgap26
chr4_117377069_117377088_+	3.514467634	3.796223247	0.094596944	Dctn1
chr4_27258080_27258170_-	2.071003399	3.851859346	0.094672082	Pex1
chr3_9012353_9012445_+	1.532989205	8.953074771	0.094672165	Sptan1
chr3_108104754_108104756_+	2.143713215	4.816031113	0.094677417	Map1a
chr6_115434613_115434709_-	2.747357822	3.337064053	0.094677417	Sel1l
chr1_67856164_67856210_-	3.651838242	2.91125304	0.094704176	Brsk1
chr3_123794627_123794670_+	2.661080958	3.698145234	0.094704176	Plcb4
chr4_160898959_160899058_-	1.408357099	6.337675347	0.09480474	Eno2
chr4_185790349_185790436_+	2.460747076	3.632113007	0.094939154	Far2
chr1_7997346_7997395_-	1.87925158	4.627417998	0.095013584	Phactr2
chr7_120223717_120223794_+	1.583254446	8.004582864	0.095033541	Aco2
chr1_149274427_149274428_+	1.952736797	3.96362961	0.095221897	Dlg2
chr1_207354307_207354308_+	2.00712587	3.818314618	0.095221897	Sptbn2
chr1_207356016_207356017_+	3.652405244	2.91128023	0.095221897	Sptbn2
chr4_149676049_149676106_-	1.679930412	4.937425338	0.095221897	Atp2b2
chr4_37879641_37879642_-	2.008757153	4.063163783	0.095221897	Thsd7a
chr6_94282075_94282152_+	1.32376029	5.786545936	0.095221897	Jkamp
chr1_47089315_47089400_-	1.807774818	8.605351392	0.095378743	Mpc1
chr2_247104954_247104958_-	1.75530227	4.539435399	0.095378743	Lphn2
chr7_56490457_56490545_-	2.049480725	5.300162102	0.095874611	Frs2
chr15_32305857_32305937_-	1.259376013	6.105860736	0.095880631	Dad1
chr7_28062065_28062147_-	1.9007548	5.570302549	0.095945172	Slc25a3
chr1_154348722_154348817_+	7.9136965	2.459022163	0.096132309	Gab2
chr3_98088495_98088579_+	2.100716301	4.164120459	0.096132309	Lpcat4
chr9_78764233_78764234_-	2.216834835	3.806456006	0.096204744	Scg2
chr12_20855978_20856025_-	2.042901807	5.116213705	0.096279984	Znhit1
chr10_55850728_55850732_-	2.206756089	4.34600376	0.096289022	.
chr13_95855000_95855071_+	2.052438611	4.038977435	0.096560902	Cdc42bpa
chr16_19624743_19624744_-	1.711141278	4.325487617	0.096580449	Homer3
chr3_88305906_88305939_-	1.750893618	6.255297267	0.096636228	Pdhx
chr2_219526667_219526735_+	2.427175156	3.791228982	0.096716264	Pde5a
chr1_212899764_212899837_+	2.239060403	3.88436955	0.096745666	Syt7
chr19_26575059_26575127_-	1.334111341	5.448274821	0.096935782	Tbc1d9
chr5_77083326_77083358_+	1.857106839	4.644178076	0.097011465	Gng10
chr11_63927438_63927439_+	8.435874721	2.447517316	0.097083116	Arhgap31
chr7_120429956_120430054_-	1.314012336	7.06311469	0.097126918	Nhp2l1
chr10_55848849_55848941_+	1.392152552	7.214737295	0.09723752	Vamp2
chr19_24841411_24841466_-	2.009293783	8.161862205	0.097892655	Prdx2
chr20_27422584_27422586_+	1.302677086	6.068918079	0.097892655	Spock2
chr1_207716771_207716835_-	8.469542531	2.210913449	0.09813086	Cnih2
chr14_70595639_70595734_+	2.47243822	3.626765042	0.09813086	Fam184b
chr5_164638021_164638101_-	2.023993554	4.189992235	0.098299006	LOC500584
chr15_55631274_55631310_-	8.10142011	2.499395122	0.098345338	Lrch1
chr10_96138829_96138831_-	1.709661882	6.496396524	0.098356337	Ddx5
chr20_13594216_13594285_-	1.52445429	5.39958618	0.098458652	Ddt
chr1_248764809_248764891_+	1.692732084	6.034954158	0.098524115	Morn4
chr6_128870655_128870657_-	1.618032255	4.69138665	0.098567025	Clmn
chr10_59871458_59871460_+	8.113467708	2.49944752	0.098587744	Atp2a3
chr20_27397708_27397709_+	1.465077512	5.449493611	0.09862711	Spock2
chr1_199345121_199345144_+	2.673525177	3.597316612	0.098891443	Inpp5a
chr6_26365955_26365962_+	2.952259979	3.024406378	0.099205804	Kif3c
chr8_113612993_113612996_-	2.662784162	3.249628836	0.099205804	Ndufaf3
chr14_37128899_37128993_-	1.993060603	5.181872748	0.099225136	Dcun1d4
chr5_159818631_159818705_+	2.130155961	7.827909521	0.099225136	Sdhb
chr10_85891966_85892058_-	2.25793672	3.815723434	0.099344564	Kpnb1
chr4_186915163_186915193_-	2.160154655	3.813210841	0.099605268	LOC500372
chr18_32189498_32189557_+	1.419261776	5.082499879	0.099755232	Arhgap26
chr1_77252771_77252836_-	2.443008736	10.53888061	0.099926058	Calm3
chr3_98085279_98085378_+	1.654971044	4.511312718	0.099926058	Lpcat4
chr11_63906042_63906117_+	8.319530245	2.499715081	0.099950532	Arhgap31
chr1_76255051_76255053_-	2.632561181	3.224629517	0.099985524	Sepw1

## Sheet: legend
logFC.pulldown	fold-change between the bound and unbound samples
logCPM.pulldown	normalized (counts-per-million), average tag count between the bound and unbound samples
FDR.pulldown	false discovery rate ("Benjamini and Hochberg FDR adjusted p-value") of the differential expression test between the bound and unbound samples
Symbol	gene symbol according to CAGEscan analysis (Symbol.full), augmented by manual curation
