# Supplementary material for: Digital expression profiling of the compartmentalized translatome of Purkinje neurons
Source: HighWire-hosted journal article supplement (doi:10.1101/gr.164095.113), 2014-06-05
Supplement: Supplemental_Table.S3.xlsx [file Supplemental_Table.S3.xlsx]

## Sheet: Table S3
id	raw.41_Ctrl_60_MB_02	raw.43_Ctrl_60_MUB_02	raw.45_Ctrl_60_cyt_02	raw.47_Ctrl_60_cytUB_02	raw.09_Ctrl_0_soma_cyt_01	raw.10_Ctrl_0_soma_MB_01	raw.11_Ctrl_0_dend_cyt_01	raw.12_Ctrl_0_dend_MB_01	raw.13_Ctrl_5_cyt_02	raw.14_Ctrl_5_MB_02	raw.01_Ctrl_5_cyt_01	raw.02_Ctrl_5_MB_01	raw.05_Ctrl_15_cyt_01	raw.06_Ctrl_15_MB_01	raw.17_Ctrl_5_cyt_03	raw.18_Ctrl_5_MB_03	raw.21_Ctrl_15_cyt_02	raw.22_Ctrl_15_MB_02	raw.25_Ctrl_15_cyt_03	raw.26_Ctrl_15_MB_03	raw.29_Ctrl_60_cyt_03	raw.30_Ctrl_60_MB_03	raw.33_Ctrl_60_cytUB_01	raw.35_Ctrl_60_MUB_01	raw.37_Ctrl_60_cyt_01	raw.39_Ctrl_60_MB_01	norm.41_Ctrl_60_MB_02	norm.43_Ctrl_60_MUB_02	norm.45_Ctrl_60_cyt_02	norm.47_Ctrl_60_cytUB_02	norm.09_Ctrl_0_soma_cyt_01	norm.10_Ctrl_0_soma_MB_01	norm.11_Ctrl_0_dend_cyt_01	norm.12_Ctrl_0_dend_MB_01	norm.13_Ctrl_5_cyt_02	norm.14_Ctrl_5_MB_02	norm.01_Ctrl_5_cyt_01	norm.02_Ctrl_5_MB_01	norm.05_Ctrl_15_cyt_01	norm.06_Ctrl_15_MB_01	norm.17_Ctrl_5_cyt_03	norm.18_Ctrl_5_MB_03	norm.21_Ctrl_15_cyt_02	norm.22_Ctrl_15_MB_02	norm.25_Ctrl_15_cyt_03	norm.26_Ctrl_15_MB_03	norm.29_Ctrl_60_cyt_03	norm.30_Ctrl_60_MB_03	norm.33_Ctrl_60_cytUB_01
chr19_53844971_53844980_+	4	1	27	1	4	0	5	3	67	16	50	12	72	18	67	19	84	30	94	44	80	30	0	0	15	6	60.8828	4.6979	115.777	2.06986	96.6908	0	621.736	120.005	194.885	83.8711	211.224	69.5955	182.017	66.2003	146.187	77.5897	172.328	83.4061	184.54	131.274	224.837	146.362	0
chr11_63814441_63814541_+	11	1	69	18	9	0	0	2	46	9	43	15	74	18	71	16	68	25	73	16	59	12	0	0	49	17	167.428	4.6979	295.874	37.2575	217.554	0	0	80.0032	133.802	47.1775	181.652	86.9943	187.073	66.2003	154.915	65.3387	139.504	69.5051	143.313	47.736	165.817	58.5449	0
chr5_30455643_30455649_+	3	2	9	1	198	25	45	58	641	139	555	133	687	146	739	159	739	204	828	243	744	189	1	0	323	67	45.6621	9.3958	38.5923	2.06986	4786.19	1116.12	5595.62	2320.09	1864.5	728.63	2344.58	771.35	1736.75	536.958	1612.42	649.303	1516.08	567.161	1625.52	724.99	2090.99	922.082	7.19735
chr4_87255911_87256011_+	6	2	37	7	37	1	2	2	201	32	182	21	192	42	278	54	253	69	325	70	265	53	0	0	63	11	91.3242	9.3958	158.657	14.489	894.39	44.6449	248.694	80.0032	584.656	167.742	768.854	121.792	485.379	154.467	606.568	220.518	519.036	191.834	638.036	208.845	744.773	258.573	0
chr5_30470441_30470467_+	9	2	74	18	8	0	1	2	131	30	115	30	157	48	95	13	124	38	163	43	116	34	6	1	82	18	136.986	9.3958	317.315	37.2575	193.382	0	124.347	80.0032	381.044	157.258	485.814	173.989	396.899	176.534	207.281	53.0877	254.389	105.648	319.999	128.29	326.014	165.877	43.1841
chr4_143858432_143858503_+	23	11	89	20	7	4	0	18	123	67	56	52	141	91	112	60	177	143	165	92	124	75	3	2	99	45	350.076	51.6769	381.635	41.3972	169.209	178.579	0	720.029	357.774	351.21	236.57	301.58	356.45	334.679	244.373	245.02	363.12	397.569	323.926	274.482	348.498	365.905	21.5921
chr6_132783334_132783406_+	12	7	74	15	10	3	2	4	93	27	69	37	93	59	92	48	112	41	129	69	102	54	1	0	60	17	182.648	32.8853	317.315	31.0479	241.727	133.935	248.694	160.006	270.512	141.532	291.489	214.586	235.106	216.99	200.735	196.016	229.771	113.988	253.251	205.861	286.667	263.452	7.19735
chr1_207318189_207318190_+	13	5	40	11	10	0	0	2	65	25	45	28	78	34	88	28	74	38	89	41	84	36	1	1	50	17	197.869	23.4895	171.521	22.7685	241.727	0	0	80.0032	189.068	131.049	190.101	162.389	197.185	125.045	192.007	114.343	151.813	105.648	174.724	122.323	236.079	175.635	7.19735
chr16_19620292_19620380_-	5	3	42	2	0	1	0	5	48	37	30	30	58	34	41	27	67	46	54	53	48	27	0	0	20	17	76.1035	14.0937	180.098	4.13972	0	44.6449	0	200.008	139.619	193.952	126.734	173.989	146.625	125.045	89.4579	110.259	137.452	127.889	106.012	158.125	134.902	131.726	0
chr17_10808950_10808968_+	7	5	40	1	28	10	4	15	130	43	99	41	179	50	167	56	191	61	178	59	155	44	0	0	78	17	106.545	23.4895	171.521	2.06986	676.835	446.449	497.389	600.024	378.136	225.403	418.223	237.785	452.515	183.89	364.377	228.685	391.841	169.592	349.447	176.026	435.622	214.665	0
chr4_143888472_143888559_+	13	4	32	12	3	2	0	9	30	26	18	18	46	45	24	24	47	66	45	48	19	25	0	0	47	29	197.869	18.7916	137.217	24.8383	72.5181	89.2897	0	360.014	87.2621	136.29	76.0405	104.393	116.289	165.501	52.3656	98.008	96.4217	183.493	88.3434	143.208	53.3988	121.968	0
chr5_30475765_30475776_+	5	0	22	5	4	1	0	1	41	5	32	17	51	18	40	12	42	18	53	32	37	12	2	1	38	11	76.1035	0	94.3368	10.3493	96.6908	44.6449	0	40.0016	119.258	26.2097	135.183	98.5936	128.929	66.2003	87.276	49.004	86.1641	50.0436	104.049	95.4719	103.987	58.5449	14.3947
chr7_55495118_55495207_+	14	4	24	7	3	2	0	3	35	42	19	33	34	54	27	41	39	55	44	57	35	37	2	1	31	24	213.09	18.7916	102.913	14.489	72.5181	89.2897	0	120.005	101.806	220.162	80.265	191.388	85.9526	198.601	58.9113	167.43	80.0095	152.911	86.3802	170.059	98.3663	180.513	14.3947
chr1_201557961_201558039_+	9	2	58	18	11	2	2	2	122	25	70	19	105	26	147	19	112	18	160	34	152	31	1	0	56	8	136.986	9.3958	248.706	37.2575	265.9	89.2897	248.694	80.0032	354.866	131.049	295.713	110.193	265.442	95.6227	320.739	77.5897	229.771	50.0436	314.11	101.439	427.191	151.241	7.19735
chr1_41870307_41870335_-	2	2	6	0	38	6	5	11	202	59	166	54	204	73	258	94	237	88	247	104	236	77	2	0	104	26	30.4414	9.3958	25.7282	0	918.562	267.869	621.736	440.018	587.565	309.275	701.262	313.18	515.715	268.479	562.93	383.865	486.212	244.658	484.907	310.284	663.27	375.663	14.3947
chr3_76314086_76314168_-	10	4	26	4	3	2	1	7	34	29	11	29	41	35	29	42	47	50	35	39	18	21	2	1	27	22	152.207	18.7916	111.489	8.27945	72.5181	89.2897	124.347	280.011	98.897	152.016	46.4692	168.189	103.649	128.723	63.2751	171.514	96.4217	139.01	68.7115	116.356	50.5884	102.454	14.3947
chr12_2529701_2529704_+	10	3	45	14	12	5	6	27	64	27	60	29	74	34	83	34	81	44	72	29	67	36	4	1	48	20	152.207	14.0937	192.962	28.9781	290.072	223.224	746.083	1080.04	186.159	141.532	253.468	168.189	187.073	125.045	181.098	138.845	166.174	122.329	141.349	86.5214	188.301	175.635	28.7894
chr5_30475602_30475631_+	16	5	84	24	12	1	0	0	143	55	77	44	182	70	111	43	153	62	183	94	134	47	6	3	89	26	243.531	23.4895	360.195	49.6767	290.072	44.6449	0	0	415.949	288.307	325.284	255.183	460.099	257.446	242.191	175.598	313.883	172.373	359.263	280.449	376.602	229.301	43.1841
chr12_36225064_36225120_+	30	10	48	20	15	1	5	6	64	58	60	51	76	77	116	86	104	103	122	105	71	96	0	0	25	28	456.621	46.979	205.826	41.3972	362.59	44.6449	621.736	240.01	186.159	304.033	253.468	295.781	192.129	283.19	253.1	351.195	213.359	286.361	239.509	313.267	199.543	468.359	0
chr13_68741756_68741798_+	6	3	42	8	3	0	0	2	40	10	29	15	44	24	41	12	47	31	55	18	49	7	0	1	38	13	91.3242	14.0937	180.098	16.5589	72.5181	0	0	80.0032	116.349	52.4194	122.51	86.9943	111.233	88.2671	89.4579	49.004	96.4217	86.1863	107.975	53.703	137.713	34.1512	0
chr4_143874217_143874276_+	21	12	54	18	9	6	2	22	100	91	45	71	126	135	104	75	123	145	125	130	86	92	3	2	96	53	319.635	56.3748	231.554	37.2575	217.554	267.869	248.694	880.035	290.874	477.017	190.101	411.773	318.53	496.502	226.918	306.275	252.338	403.129	245.398	387.855	241.7	448.844	21.5921
chr4_143874905_143874931_+	21	11	38	14	2	2	1	11	57	54	27	49	78	94	58	62	80	95	65	68	50	51	2	2	59	32	319.635	51.6769	162.945	28.9781	48.3454	89.2897	124.347	440.018	165.798	283.065	114.061	284.182	197.185	345.713	126.55	253.187	164.122	264.119	127.607	202.878	140.523	248.816	14.3947
chr7_116127544_116127546_-	5	0	28	5	8	0	1	4	71	14	47	8	67	10	70	17	74	18	69	17	61	15	4	0	34	11	76.1035	0	120.065	10.3493	193.382	0	124.347	160.006	206.52	73.3872	198.55	46.397	169.377	36.778	152.733	69.4223	151.813	50.0436	135.46	50.7195	171.438	73.1811	28.7894
chr3_56186668_56186739_-	13	4	96	32	14	1	1	2	172	19	156	23	191	47	264	36	287	55	294	59	192	30	6	0	78	15	197.869	18.7916	411.651	66.2356	338.418	44.6449	124.347	80.0032	500.303	99.5969	659.018	133.391	482.851	172.856	576.022	147.012	588.788	152.911	577.177	176.026	539.609	146.362	43.1841
chr1_64170848_64170901_-	9	0	19	4	0	0	0	0	29	13	12	8	27	16	23	8	33	20	29	15	30	4	0	0	17	3	136.986	0	81.4727	8.27945	0	0	0	0	84.3533	68.1452	50.6937	46.397	68.2565	58.8447	50.1837	32.6693	67.7004	55.6041	56.9324	44.7525	84.314	19.515	0
chr18_28596134_28596184_+	2	2	3	1	43	7	2	10	202	80	176	86	254	98	263	112	248	127	344	167	302	133	1	0	127	34	30.4414	9.3958	12.8641	2.06986	1039.43	312.514	248.694	400.016	587.565	419.355	743.507	498.768	642.116	360.424	573.84	457.371	508.778	353.086	675.336	498.244	848.76	648.872	7.19735
chr4_56810118_56810130_+	6	3	23	7	9	3	2	7	70	28	50	20	71	27	97	42	84	49	96	48	82	44	0	0	34	13	91.3242	14.0937	98.6248	14.489	217.554	133.935	248.694	280.011	203.611	146.774	211.224	115.992	179.489	99.3005	211.644	171.514	172.328	136.23	188.466	143.208	230.458	214.665	0
chr1_199188181_199188259_+	4	1	24	6	4	1	0	0	36	19	26	9	33	21	29	12	45	27	44	18	37	21	0	0	24	10	60.8828	4.6979	102.913	12.4192	96.6908	44.6449	0	0	104.714	99.5969	109.836	52.1966	83.4246	77.2337	63.2751	49.004	92.3187	75.0655	86.3802	53.703	103.987	102.454	0
chr4_143831344_143831402_+	22	12	67	25	0	0	1	9	74	52	64	56	91	93	59	45	80	94	79	79	68	56	5	3	73	47	334.855	56.3748	287.298	51.7465	0	0	124.347	360.014	215.246	272.581	270.366	324.779	230.05	342.035	128.732	183.765	164.122	261.339	155.092	235.696	191.112	273.209	35.9868
chr19_41669225_41669296_-	7	3	81	20	19	1	3	5	104	25	139	10	145	19	157	27	138	17	204	28	167	15	0	0	56	3	106.545	14.0937	347.331	41.3972	459.281	44.6449	373.042	200.008	302.508	131.049	587.202	57.9962	366.562	69.8781	342.558	110.259	283.111	47.2634	400.49	83.538	469.348	73.1811	0
chr6_42783324_42783325_-	4	4	62	12	19	2	1	1	111	24	96	22	116	39	152	32	127	40	135	36	86	29	0	0	54	11	60.8828	18.7916	265.858	24.8383	459.281	89.2897	124.347	40.0016	322.87	125.807	405.549	127.592	293.25	143.434	331.649	130.677	260.544	111.208	265.03	107.406	241.7	141.483	0
chr14_7175956_7176013_-	8	3	33	9	6	1	1	1	44	17	33	11	57	16	64	23	83	24	68	19	61	23	0	0	33	6	121.766	14.0937	141.505	18.6288	145.036	44.6449	124.347	40.0016	127.984	89.113	139.408	63.7959	144.097	58.8447	139.642	93.9243	170.277	66.7249	133.497	56.6865	171.438	112.211	0
chr1_148524251_148524263_+	7	3	73	10	15	0	6	9	157	24	94	24	155	27	171	18	182	43	213	33	152	34	7	0	71	5	106.545	14.0937	313.027	20.6986	362.59	0	746.083	360.014	456.671	125.807	397.1	139.191	391.843	99.3005	373.105	73.506	373.378	119.549	418.159	98.4554	427.191	165.877	50.3815
chr5_144084011_144084098_+	7	1	35	11	7	4	2	3	95	38	56	27	93	56	104	50	143	58	159	72	107	52	7	0	53	16	106.545	4.6979	150.081	22.7685	169.209	178.579	248.694	120.005	276.33	199.194	236.57	156.59	235.106	205.957	226.918	204.183	293.368	161.252	312.147	214.812	300.72	253.694	50.3815
chr13_80234541_80234548_-	0	0	0	1	11	4	2	17	70	100	50	126	86	154	70	122	84	150	107	190	67	136	0	1	49	67	0	0	0	2.06986	265.9	178.579	248.694	680.027	203.611	524.194	211.224	730.753	217.409	566.381	152.733	498.207	172.328	417.03	210.061	566.865	188.301	663.508	0
chr5_30478804_30478850_+	40	16	134	46	9	2	2	3	156	48	192	84	198	68	136	41	178	58	241	86	158	46	13	3	160	52	608.828	75.1664	574.597	95.2137	217.554	89.2897	248.694	120.005	453.763	251.613	811.099	487.168	500.547	250.09	296.738	167.43	365.172	161.252	473.128	256.581	444.053	224.422	93.5656
chr1_207332881_207332967_+	21	9	47	25	1	2	0	1	51	47	44	40	89	80	55	55	88	90	108	84	62	57	2	3	57	38	319.635	42.2811	201.538	51.7465	24.1727	89.2897	0	40.0016	148.346	246.371	185.877	231.985	224.993	294.224	120.005	224.602	180.534	250.218	212.024	250.614	174.249	278.088	14.3947
chr1_253228559_253228626_+	5	4	38	6	6	0	2	7	94	22	81	9	104	34	124	22	106	36	133	28	99	24	0	0	32	9	76.1035	18.7916	162.945	12.4192	145.036	0	248.694	280.011	273.421	115.323	342.182	52.1966	262.914	125.045	270.556	89.8407	217.462	100.087	261.104	83.538	278.236	117.09	0
chr15_45791977_45792048_+	9	6	36	6	3	0	0	1	33	13	31	14	32	23	21	16	25	27	37	32	21	20	2	0	39	12	136.986	28.1874	154.369	12.4192	72.5181	0	0	40.0016	95.9883	68.1452	130.959	81.1947	80.8965	84.5893	45.8199	65.3387	51.2882	75.0655	72.6379	95.4719	59.0198	97.5748	14.3947
chr5_63262067_63262151_-	21	7	10	1	1	4	0	5	17	46	20	26	16	55	24	35	13	66	18	47	5	46	1	1	5	27	319.635	32.8853	42.8804	2.06986	24.1727	178.579	0	200.008	49.4485	241.129	84.4894	150.79	40.4483	202.279	52.3656	142.928	26.6698	183.493	35.3374	140.224	14.0523	224.422	7.19735
chr1_64162841_64162923_-	10	3	38	16	2	0	0	1	31	14	22	8	44	20	31	21	58	26	63	29	60	17	2	2	59	14	152.207	14.0937	162.945	33.1178	48.3454	0	0	40.0016	90.1708	73.3872	92.9384	46.397	111.233	73.5559	67.6389	85.757	118.989	72.2853	123.681	86.5214	168.628	82.9386	14.3947
chr19_9818924_9819016_-	4	3	56	17	20	2	9	11	87	28	78	13	102	23	133	26	137	34	124	22	86	33	7	0	72	16	60.8828	14.0937	240.13	35.1877	483.454	89.2897	1119.12	440.018	253.06	146.774	329.509	75.3951	257.858	84.5893	290.193	106.175	281.059	94.5269	243.435	65.637	241.7	160.998	50.3815
chr3_105668398_105668415_-	15	7	55	15	14	7	1	9	63	31	46	30	86	49	88	36	129	64	138	76	92	39	0	0	20	7	228.311	32.8853	235.842	31.0479	338.418	312.514	124.347	360.014	183.25	162.5	194.326	173.989	217.409	180.212	192.007	147.012	264.647	177.933	270.92	226.746	258.563	190.271	0
chr8_125499371_125499376_+	2	1	12	0	3	0	1	0	23	2	21	1	26	2	43	5	34	9	44	12	20	6	0	0	11	4	30.4414	4.6979	51.4564	0	72.5181	0	124.347	0	66.9009	10.4839	88.7139	5.79962	65.7284	7.35559	93.8217	20.4183	69.7519	25.0218	86.3802	35.802	56.2093	29.2724	0
chr3_105671791_105671854_-	33	14	64	28	18	23	7	136	210	153	195	136	278	166	273	260	260	263	317	235	283	225	2	0	123	27	502.283	65.7706	274.434	57.9561	435.108	1026.83	870.43	5440.22	610.834	802.017	823.772	788.749	702.789	610.514	595.659	1061.75	533.397	731.193	622.33	701.122	795.362	1097.72	14.3947
chr13_68735138_68735174_+	16	8	85	22	4	2	1	7	51	45	39	43	127	57	80	43	93	63	137	94	97	47	5	3	44	22	243.531	37.5832	364.483	45.537	96.6908	89.2897	124.347	280.011	148.346	235.887	164.754	249.384	321.058	209.634	174.552	175.598	190.792	175.153	268.957	280.449	272.615	229.301	35.9868
chr1_178003983_178004018_-	1	4	20	1	45	19	10	10	308	73	204	52	312	64	321	76	350	101	437	117	356	105	1	0	121	20	15.2207	18.7916	85.7607	2.06986	1087.77	848.252	1243.47	400.016	895.891	382.662	861.792	301.58	788.741	235.379	700.39	310.359	718.034	280.8	857.912	349.069	1000.53	512.268	7.19735
chr8_85374867_85374913_-	13	5	37	11	2	2	1	2	47	38	38	53	91	41	60	35	82	53	103	52	31	23	3	1	28	12	197.869	23.4895	158.657	22.7685	48.3454	89.2897	124.347	80.0032	136.711	199.194	160.53	307.38	230.05	150.79	130.914	142.928	168.225	147.351	202.208	155.142	87.1244	112.211	21.5921
chr2_250793589_250793630_-	2	0	15	1	3	1	1	1	56	7	24	7	52	6	25	0	55	6	59	10	41	9	0	0	21	0	30.4414	0	64.3205	2.06986	72.5181	44.6449	124.347	40.0016	162.889	36.6936	101.387	40.5974	131.457	22.0668	54.5475	0	112.834	16.6812	115.828	29.835	115.229	43.9087	0
chr5_75745298_75745301_+	1	0	12	1	4	1	1	0	28	6	21	6	27	6	28	5	30	4	31	3	34	2	0	0	12	6	15.2207	0	51.4564	2.06986	96.6908	44.6449	124.347	0	81.4446	31.4517	88.7139	34.7977	68.2565	22.0668	61.0932	20.4183	61.5458	11.1208	60.8588	8.95049	95.5558	9.75748	0
chr4_143899570_143899653_+	47	25	83	28	7	7	2	14	79	105	78	111	108	164	76	97	78	161	92	159	59	100	7	8	109	86	715.373	117.448	355.907	57.9561	169.209	312.514	248.694	560.022	229.79	550.404	329.509	643.758	273.026	603.158	165.824	396.116	160.019	447.613	180.613	474.376	165.817	487.874	50.3815
chr8_113706011_113706070_-	1	1	0	0	31	13	10	13	160	57	135	42	174	55	239	85	248	95	227	77	193	63	0	0	88	20	15.2207	4.6979	0	0	749.353	580.383	1243.47	520.021	465.398	298.791	570.304	243.584	439.875	202.279	521.474	347.112	508.778	264.119	445.643	229.729	542.42	307.361	0
chr6_94682052_94682060_-	4	4	54	5	5	2	0	5	34	13	39	14	36	22	57	18	39	27	67	47	59	20	1	0	29	6	60.8828	18.7916	231.554	10.3493	120.863	89.2897	0	200.008	98.897	68.1452	164.754	81.1947	91.0086	80.9115	124.368	73.506	80.0095	75.0655	131.533	140.224	165.817	97.5748	7.19735
chr20_1577887_1577888_-	11	2	11	3	3	1	1	2	3	12	5	12	6	17	5	14	4	12	9	15	6	12	0	0	4	7	167.428	9.3958	47.1684	6.20959	72.5181	44.6449	124.347	80.0032	8.72621	62.9033	21.1224	69.5955	15.1681	62.5225	10.9095	57.1713	8.2061	33.3624	17.6687	44.7525	16.8628	58.5449	0
chr11_28106769_28106788_-	4	0	14	4	2	1	0	0	15	15	9	4	18	11	21	15	13	18	17	19	23	12	1	1	20	15	60.8828	0	60.0325	8.27945	48.3454	44.6449	0	0	43.631	78.6291	38.0202	23.1985	45.5043	40.4558	45.8199	61.255	26.6698	50.0436	33.3742	56.6865	64.6407	58.5449	7.19735
chr13_68724184_68724195_+	15	8	85	38	22	5	8	15	87	25	111	29	143	47	166	54	179	78	182	70	133	40	4	0	65	18	228.311	37.5832	364.483	78.6548	531.799	223.224	994.777	600.024	253.06	131.049	468.916	168.189	361.506	172.856	362.196	220.518	367.223	216.856	357.3	208.845	373.792	195.15	28.7894
chr1_27539665_27539752_+	7	4	26	10	16	4	2	1	68	23	78	30	88	31	98	26	81	40	152	55	92	21	3	0	49	17	106.545	18.7916	111.489	20.6986	386.763	178.579	248.694	40.0016	197.794	120.565	329.509	173.989	222.465	114.012	213.826	106.175	166.174	111.208	298.404	164.092	258.563	102.454	21.5921
chr13_68724170_68724172_+	3	0	13	0	5	0	0	0	8	2	10	5	13	13	15	3	20	9	19	8	10	4	0	0	7	1	45.6621	0	55.7445	0	120.863	0	0	0	23.2699	10.4839	42.2447	28.9981	32.8642	47.8113	32.7285	12.251	41.0305	25.0218	37.3005	23.868	28.1047	19.515	0
chr5_30473690_30473740_+	14	11	84	19	13	2	0	0	147	40	135	39	202	50	121	31	169	56	218	74	143	45	8	1	103	28	213.09	51.6769	360.195	39.3274	314.245	89.2897	0	0	427.584	209.678	570.304	226.185	510.659	183.89	264.01	126.594	346.708	155.691	427.975	220.779	401.897	219.543	57.5788
chr14_77946507_77946588_+	29	19	28	7	8	1	0	5	27	71	14	57	37	109	16	65	32	131	28	129	22	64	5	2	31	53	441.4	89.2601	120.065	14.489	193.382	44.6449	0	200.008	78.5359	372.178	59.1426	330.579	93.5366	400.88	34.9104	265.438	65.6488	364.207	54.9692	384.871	61.8302	312.239	35.9868
chr10_59879036_59879134_+	9	1	5	0	0	1	1	3	4	23	2	8	3	24	5	11	5	19	12	23	1	17	0	0	1	17	136.986	4.6979	21.4402	0	0	44.6449	124.347	120.005	11.6349	120.565	8.44894	46.397	7.58405	88.2671	10.9095	44.9203	10.2576	52.8239	23.5582	68.6205	2.81047	82.9386	0
chr10_72794453_72794467_-	15	8	141	47	33	4	7	12	226	43	161	41	239	48	251	57	291	62	330	96	272	68	0	0	77	11	228.311	37.5832	604.613	97.2835	797.699	178.579	870.43	480.019	657.374	225.403	680.14	237.785	604.196	176.534	547.657	232.769	596.994	172.373	647.851	286.416	764.446	331.754	0
chr4_143881422_143881519_+	35	20	67	23	2	4	2	8	59	74	53	83	89	114	56	89	82	138	69	93	45	73	10	9	121	93	532.725	93.958	287.298	47.6068	48.3454	178.579	248.694	320.013	171.615	387.904	223.897	481.369	224.993	419.269	122.186	363.446	168.225	383.668	135.46	277.465	126.471	356.148	71.9735
chr4_143893097_143893196_+	12	9	40	18	4	1	0	5	36	56	13	36	57	80	40	38	45	76	45	42	35	45	0	1	54	37	182.648	42.2811	171.521	37.2575	96.6908	44.6449	0	200.008	104.714	293.549	54.9181	208.786	144.097	294.224	87.276	155.179	92.3187	211.295	88.3434	125.307	98.3663	219.543	0
chr7_24531662_24531680_+	3	0	8	0	1	0	0	0	4	2	1	1	5	6	2	3	10	4	12	5	2	2	0	0	2	1	45.6621	0	34.3043	0	24.1727	0	0	0	11.6349	10.4839	4.22447	5.79962	12.6401	22.0668	4.3638	12.251	20.5153	11.1208	23.5582	14.9175	5.62093	9.75748	0
chr18_56879135_56879143_+	8	6	24	8	8	4	2	11	31	23	22	17	50	26	45	23	42	41	54	41	48	21	1	0	37	21	121.766	28.1874	102.913	16.5589	193.382	178.579	248.694	440.018	90.1708	120.565	92.9384	98.5936	126.401	95.6227	98.1855	93.9243	86.1641	113.988	106.012	122.323	134.902	102.454	7.19735
chr9_91689600_91689670_-	0	1	1	0	20	5	2	4	123	34	96	38	124	43	173	46	174	59	190	62	127	45	0	0	62	14	0	4.6979	4.28804	0	483.454	223.224	248.694	160.006	357.774	178.226	405.549	220.386	313.474	158.145	377.469	187.849	356.966	164.032	373.005	184.977	356.929	219.543	0
chr5_59522073_59522102_-	1	1	11	0	6	2	0	1	39	4	28	6	31	2	40	5	46	9	41	6	37	3	0	0	17	2	15.2207	4.6979	47.1684	0	145.036	89.2897	0	40.0016	113.441	20.9678	118.285	34.7977	78.3685	7.35559	87.276	20.4183	94.3702	25.0218	80.4906	17.901	103.987	14.6362	0
chr17_85654872_85654883_-	0	2	19	0	17	0	3	4	123	15	108	15	123	10	149	14	144	30	153	26	130	31	0	0	41	4	0	9.3958	81.4727	0	410.936	0	373.042	160.006	357.774	78.6291	456.243	86.9943	310.946	36.778	325.103	57.1713	295.42	83.4061	300.368	77.571	365.36	151.241	0
chr13_68740765_68740847_+	6	3	49	11	5	1	1	2	31	12	29	9	52	25	60	20	70	45	76	34	62	21	1	4	61	16	91.3242	14.0937	210.114	22.7685	120.863	44.6449	124.347	80.0032	90.1708	62.9033	122.51	52.1966	131.457	91.9449	130.914	81.6733	143.607	125.109	149.202	101.439	174.249	102.454	7.19735
chr10_61870705_61870767_-	2	1	18	5	1	1	2	1	46	23	24	12	49	18	55	18	31	25	63	28	46	22	0	0	23	9	30.4414	4.6979	77.1846	10.3493	24.1727	44.6449	248.694	40.0016	133.802	120.565	101.387	69.5955	123.873	66.2003	120.005	73.506	63.5973	69.5051	123.681	83.538	129.281	107.332	0
chr14_105005287_105005383_+	6	2	27	5	3	0	0	0	47	8	33	11	41	17	63	19	56	17	59	23	34	9	1	0	16	2	91.3242	9.3958	115.777	10.3493	72.5181	0	0	0	136.711	41.9355	139.408	63.7959	103.649	62.5225	137.46	77.5897	114.885	47.2634	115.828	68.6205	95.5558	43.9087	7.19735
chr1_94826265_94826355_+	9	7	20	6	1	8	3	12	18	17	5	23	29	34	30	26	22	40	35	39	28	29	1	0	28	29	136.986	32.8853	85.7607	12.4192	24.1727	357.159	373.042	480.019	52.3572	89.113	21.1224	133.391	73.3125	125.045	65.457	106.175	45.1336	111.208	68.7115	116.356	78.693	141.483	7.19735
chr1_148900197_148900238_+	3	1	10	1	0	0	0	0	17	3	6	4	26	8	11	4	14	11	19	5	11	3	0	0	9	5	45.6621	4.6979	42.8804	2.06986	0	0	0	0	49.4485	15.7258	25.3468	23.1985	65.7284	29.4224	24.0009	16.3347	28.7214	30.5822	37.3005	14.9175	30.9151	14.6362	0
chr4_143913667_143913693_+	4	4	17	4	0	0	0	0	9	20	11	20	13	26	12	25	14	34	16	29	20	20	2	2	38	31	60.8828	18.7916	72.8966	8.27945	0	0	0	0	26.1786	104.839	46.4692	115.992	32.8642	95.6227	26.1828	102.092	28.7214	94.5269	31.411	86.5214	56.2093	97.5748	14.3947
chr10_72806484_72806560_-	43	25	198	57	37	12	5	5	229	96	208	96	317	116	271	115	296	126	389	178	299	119	0	0	139	31	654.49	117.448	849.031	117.982	894.39	535.738	621.736	200.008	666.1	503.226	878.69	556.764	801.381	426.624	591.295	469.622	607.252	350.306	763.679	531.063	840.329	580.57	0
chr6_104471799_104471847_+	7	0	44	19	5	1	0	2	75	30	20	23	69	32	39	18	53	28	64	31	50	29	3	1	45	8	106.545	0	188.674	39.3274	120.863	44.6449	0	80.0032	218.155	157.258	84.4894	133.391	174.433	117.689	85.0941	73.506	108.731	77.8457	125.644	92.4884	140.523	141.483	21.5921
chr14_77935554_77935648_+	20	9	17	7	5	1	0	4	28	65	28	37	39	103	37	58	45	88	42	103	23	83	3	1	24	27	304.414	42.2811	72.8966	14.489	120.863	44.6449	0	160.006	81.4446	340.726	118.285	214.586	98.5927	378.813	80.7303	236.853	92.3187	244.658	82.4538	307.3	64.6407	404.935	21.5921
chr4_122612187_122612193_-	5	0	8	2	2	0	0	1	7	8	6	10	13	18	13	17	12	13	18	18	11	16	0	0	8	7	76.1035	0	34.3043	4.13972	48.3454	0	0	40.0016	20.3611	41.9355	25.3468	57.9962	32.8642	66.2003	28.3647	69.4223	24.6183	36.1426	35.3374	53.703	30.9151	78.0598	0
chr12_2529950_2529952_+	11	7	34	9	13	3	8	17	52	30	47	21	56	35	64	30	69	42	62	30	73	29	6	0	53	16	167.428	32.8853	145.793	18.6288	314.245	133.935	994.777	680.027	151.254	157.258	198.55	121.792	141.569	128.723	139.642	122.51	141.555	116.769	121.718	89.5049	205.164	141.483	43.1841
chr1_8168135_8168232_-	2	4	54	8	7	1	0	0	91	15	74	7	75	12	87	12	111	15	130	30	93	17	0	0	44	11	30.4414	18.7916	231.554	16.5589	169.209	44.6449	0	0	264.695	78.6291	312.611	40.5974	189.601	44.1335	189.825	49.004	227.719	41.703	255.214	89.5049	261.373	82.9386	0
chr1_235765559_235765561_-	2	0	12	0	1	0	1	0	10	5	22	8	23	4	34	2	33	10	30	8	18	7	0	0	9	1	30.4414	0	51.4564	0	24.1727	0	124.347	0	29.0874	26.2097	92.9384	46.397	58.1444	14.7112	74.1846	8.16733	67.7004	27.802	58.8956	23.868	50.5884	34.1512	0
chr1_179815997_179816081_-	8	1	25	10	0	3	0	1	33	12	12	12	41	17	25	9	39	18	44	21	22	16	3	0	22	8	121.766	4.6979	107.201	20.6986	0	133.935	0	40.0016	95.9883	62.9033	50.6937	69.5955	103.649	62.5225	54.5475	36.753	80.0095	50.0436	86.3802	62.6535	61.8302	78.0598	21.5921
chr4_152343657_152343661_+	7	4	61	26	11	1	2	0	100	18	70	18	86	24	111	26	100	31	131	31	120	32	0	0	43	12	106.545	18.7916	261.57	53.8164	265.9	44.6449	248.694	0	290.874	94.355	295.713	104.393	217.409	88.2671	242.191	106.175	205.153	86.1863	257.177	92.4884	337.256	156.12	0
chr7_27840387_27840468_+	4	3	30	8	1	0	0	0	28	2	19	7	30	7	24	9	40	11	39	7	22	2	1	1	31	7	60.8828	14.0937	128.641	16.5589	24.1727	0	0	0	81.4446	10.4839	80.265	40.5974	75.8405	25.7446	52.3656	36.753	82.061	30.5822	76.5643	20.8845	61.8302	9.75748	7.19735
chr10_82588137_82588197_-	9	2	78	46	26	3	16	12	144	32	127	27	154	31	215	34	219	52	237	42	171	32	1	0	78	10	136.986	9.3958	334.467	95.2137	628.49	133.935	1989.55	480.019	418.858	167.742	536.508	156.59	389.315	114.012	469.109	138.845	449.284	144.571	465.275	125.307	480.59	156.12	7.19735
chr2_127698777_127698834_+	8	3	49	26	11	1	3	3	113	21	97	24	118	26	160	39	143	29	160	38	137	22	0	0	54	11	121.766	14.0937	210.114	53.8164	265.9	44.6449	373.042	120.005	328.687	110.081	409.774	139.191	298.306	95.6227	349.104	159.263	293.368	80.6259	314.11	113.373	385.034	107.332	0
chr18_28610865_28610934_+	13	12	67	21	9	1	0	6	66	50	52	40	85	56	79	51	65	63	92	83	93	56	1	0	44	14	197.869	56.3748	287.298	43.4671	217.554	44.6449	0	240.01	191.977	262.097	219.673	231.985	214.881	205.957	172.37	208.267	133.349	175.153	180.613	247.63	261.373	273.209	7.19735
chr7_138395593_138395656_-	3	1	13	2	9	0	1	3	34	7	41	14	60	15	57	18	56	18	74	27	51	15	0	0	18	2	45.6621	4.6979	55.7445	4.13972	217.554	0	124.347	120.005	98.897	36.6936	173.203	81.1947	151.681	55.1669	124.368	73.506	114.885	50.0436	145.276	80.5545	143.334	73.1811	0
chr10_56624233_56624287_-	2	0	24	6	13	2	7	15	88	15	89	27	113	33	147	25	153	31	155	23	129	35	0	0	15	6	30.4414	0	102.913	12.4192	314.245	89.2897	870.43	600.024	255.969	78.6291	375.978	156.59	285.666	121.367	320.739	102.092	313.883	86.1863	304.294	68.6205	362.55	170.756	0
chrX_123585775_123585777_+	2	2	10	3	24	3	4	14	72	32	72	25	94	46	91	41	93	46	82	35	61	20	1	0	39	14	30.4414	9.3958	42.8804	6.20959	580.145	133.935	497.389	560.022	209.429	167.742	304.162	144.991	237.634	169.179	198.553	167.43	190.792	127.889	160.981	104.422	171.438	97.5748	7.19735
chr4_165818026_165818091_+	4	1	19	5	0	0	1	1	38	6	18	14	53	23	46	8	57	15	70	23	40	10	0	0	9	6	60.8828	4.6979	81.4727	10.3493	0	0	124.347	40.0016	110.532	31.4517	76.0405	81.1947	133.985	84.5893	100.367	32.6693	116.937	41.703	137.423	68.6205	112.419	48.7874	0
chr10_89627388_89627461_-	12	7	34	16	7	0	1	10	51	14	44	30	66	30	89	24	77	54	104	59	65	26	0	0	29	18	182.648	32.8853	145.793	33.1178	169.209	0	124.347	400.016	148.346	73.3872	185.877	173.989	166.849	110.334	194.189	98.008	157.968	150.131	204.171	176.026	182.68	126.847	0
chr1_265329516_265329606_-	3	0	13	5	0	0	0	2	15	7	5	4	15	9	9	10	14	6	24	3	10	10	0	0	20	7	45.6621	0	55.7445	10.3493	0	0	0	80.0032	43.631	36.6936	21.1224	23.1985	37.9203	33.1002	19.6371	40.8367	28.7214	16.6812	47.1165	8.95049	28.1047	48.7874	0
chr1_94823413_94823467_+	7	3	5	1	0	0	0	6	7	16	8	23	14	30	14	21	6	32	8	29	7	19	0	0	11	13	106.545	14.0937	21.4402	2.06986	0	0	0	240.01	20.3611	83.8711	33.7958	133.391	35.3922	110.334	30.5466	85.757	12.3092	88.9665	15.7055	86.5214	19.6733	92.696	0
chr4_143979480_143979572_+	10	5	21	7	0	0	0	5	41	55	13	27	43	55	34	50	46	84	49	51	27	49	0	3	20	32	152.207	23.4895	90.0488	14.489	0	0	0	200.008	119.258	288.307	54.9181	156.59	108.705	202.279	74.1846	204.183	94.3702	233.537	96.1961	152.158	75.8826	239.058	0
chr1_158140509_158140510_+	3	0	15	5	2	1	2	1	20	3	21	2	21	2	39	9	34	12	31	5	16	4	0	0	17	4	45.6621	0	64.3205	10.3493	48.3454	44.6449	248.694	40.0016	58.1747	15.7258	88.7139	11.5992	53.0884	7.35559	85.0941	36.753	69.7519	33.3624	60.8588	14.9175	44.9674	19.515	0
chr1_250054534_250054622_+	5	5	34	8	6	0	1	11	21	29	17	10	31	35	41	42	35	33	45	37	27	30	1	0	29	10	76.1035	23.4895	145.793	16.5589	145.036	0	124.347	440.018	61.0834	152.016	71.816	57.9962	78.3685	128.723	89.4579	171.514	71.8034	91.7467	88.3434	110.389	75.8826	146.362	7.19735
chr4_152375811_152375869_+	8	5	25	7	0	2	0	0	27	4	12	4	23	9	27	11	29	16	39	19	19	4	3	1	30	13	121.766	23.4895	107.201	14.489	0	89.2897	0	0	78.5359	20.9678	50.6937	23.1985	58.1444	33.1002	58.9113	44.9203	59.4943	44.4832	76.5643	56.6865	53.3988	19.515	21.5921
chr2_154668988_154669022_+	2	2	37	8	8	0	0	1	46	6	47	12	44	21	69	19	79	22	75	19	57	15	3	0	33	7	30.4414	9.3958	158.657	16.5589	193.382	0	0	40.0016	133.802	31.4517	198.55	69.5955	111.233	77.2337	150.551	77.5897	162.071	61.1645	147.239	56.6865	160.197	73.1811	21.5921
chr4_84852003_84852079_+	29	15	153	51	11	1	1	0	144	51	74	38	150	71	120	24	154	60	155	81	126	49	9	6	158	42	441.4	70.4685	656.07	105.563	265.9	44.6449	124.347	0	418.858	267.339	312.611	220.386	379.203	261.123	261.828	98.008	315.935	166.812	304.294	241.663	354.119	239.058	64.7762
chr8_31584772_31584794_-	2	0	12	1	2	0	0	0	10	4	6	4	16	0	23	0	26	2	26	4	31	3	0	0	9	1	30.4414	0	51.4564	2.06986	48.3454	0	0	0	29.0874	20.9678	25.3468	23.1985	40.4483	0	50.1837	0	53.3397	5.56041	51.0428	11.934	87.1244	14.6362	0
chr1_5744579_5744652_-	45	23	74	37	15	13	2	10	93	73	91	83	97	112	86	115	100	141	125	149	107	130	4	0	32	31	684.932	108.052	317.315	76.5849	362.59	580.383	248.694	400.016	270.512	382.662	384.427	481.369	245.218	411.913	187.643	469.622	205.153	392.009	245.398	444.541	300.72	634.236	28.7894
chr8_47030160_47030192_+	64	44	61	24	9	2	1	8	47	108	37	110	42	154	31	110	31	157	48	166	37	114	4	4	49	80	974.125	206.708	261.57	49.6767	217.554	89.2897	124.347	320.013	136.711	566.13	156.305	637.959	106.177	566.381	67.6389	449.203	63.5973	436.492	94.2329	495.261	103.987	556.176	28.7894
chr6_76177579_76177593_+	1	0	5	3	41	11	2	8	162	73	134	61	191	89	187	79	208	103	251	149	195	107	0	1	44	22	15.2207	0	21.4402	6.20959	991.08	491.093	248.694	320.013	471.215	382.662	566.079	353.777	482.851	327.324	408.015	322.61	426.717	286.361	492.76	444.541	548.041	522.025	0
chr11_83403436_83403515_-	4	0	8	1	1	0	0	0	6	7	3	9	10	15	14	10	16	22	12	16	11	12	0	0	6	3	60.8828	0	34.3043	2.06986	24.1727	0	0	0	17.4524	36.6936	12.6734	52.1966	25.2802	55.1669	30.5466	40.8367	32.8244	61.1645	23.5582	47.736	30.9151	58.5449	0
chr1_148690324_148690424_+	33	20	212	64	18	8	0	30	262	143	169	109	322	123	196	94	255	185	307	164	265	123	16	5	186	56	502.283	93.958	909.064	132.471	435.108	357.159	0	1200.05	762.089	749.598	713.936	632.159	814.021	452.369	427.653	383.865	523.139	514.338	602.698	489.294	744.773	600.085	115.158
chr1_207355089_207355139_+	28	19	62	25	5	5	2	3	108	91	72	88	141	145	80	68	115	126	178	139	126	116	8	3	79	45	426.18	89.2601	265.858	51.7465	120.863	223.224	248.694	120.005	314.143	477.017	304.162	510.367	356.45	533.28	174.552	277.689	235.926	350.306	349.447	414.706	354.119	565.934	57.5788
chr1_180921711_180921746_-	21	17	74	3	30	1	10	19	229	54	197	44	233	52	301	56	271	68	330	68	284	67	1	0	113	22	319.635	79.8643	317.315	6.20959	725.181	44.6449	1243.47	760.03	666.1	283.065	832.221	255.183	589.028	191.245	656.752	228.685	555.964	189.054	647.851	202.878	798.172	326.876	7.19735
chr3_59904415_59904487_-	7	3	31	12	1	1	0	4	43	19	9	9	36	17	32	13	58	28	40	28	39	21	1	0	36	6	106.545	14.0937	132.929	24.8383	24.1727	44.6449	0	160.006	125.076	99.5969	38.0202	52.1966	91.0086	62.5225	69.8208	53.0877	118.989	77.8457	78.5275	83.538	109.608	102.454	7.19735
chr4_143876495_143876496_+	2	2	10	2	0	1	0	3	15	21	7	7	10	17	12	11	18	14	21	16	15	17	0	0	16	14	30.4414	9.3958	42.8804	4.13972	0	44.6449	0	120.005	43.631	110.081	29.5713	40.5974	25.2802	62.5225	26.1828	44.9203	36.9275	38.9228	41.2269	47.736	42.157	82.9386	0
chr9_110314906_110315002_+	0	0	14	2	0	0	1	1	17	3	15	4	26	6	14	3	18	4	33	7	22	6	0	0	17	1	0	0	60.0325	4.13972	0	0	124.347	40.0016	49.4485	15.7258	63.3671	23.1985	65.7284	22.0668	30.5466	12.251	36.9275	11.1208	64.7851	20.8845	61.8302	29.2724	0
chr1_64147758_64147824_-	9	7	62	29	11	0	3	3	62	45	78	39	91	54	65	43	106	75	95	57	62	38	0	0	95	34	136.986	32.8853	265.858	60.026	265.9	0	373.042	120.005	180.342	235.887	329.509	226.185	230.05	198.601	141.824	175.598	217.462	208.515	186.503	170.059	174.249	185.392	0
chr4_143952704_143952705_+	6	2	14	6	2	1	0	5	8	12	7	9	15	13	11	14	11	19	16	17	11	13	1	0	16	13	91.3242	9.3958	60.0325	12.4192	48.3454	44.6449	0	200.008	23.2699	62.9033	29.5713	52.1966	37.9203	47.8113	24.0009	57.1713	22.5668	52.8239	31.411	50.7195	30.9151	63.4236	7.19735
chr3_155507614_155507648_+	8	7	48	19	11	2	1	3	102	27	97	26	98	35	128	32	132	40	157	39	120	38	1	0	68	12	121.766	32.8853	205.826	39.3274	265.9	89.2897	124.347	120.005	296.691	141.532	409.774	150.79	247.746	128.723	279.283	130.677	270.801	111.208	308.22	116.356	337.256	185.392	7.19735
chr10_63804852_63804909_+	2	2	6	1	2	0	0	0	26	8	24	7	28	8	32	8	38	8	51	16	40	10	0	0	38	10	30.4414	9.3958	25.7282	2.06986	48.3454	0	0	0	75.6271	41.9355	101.387	40.5974	70.7845	29.4224	69.8208	32.6693	77.958	22.2416	100.123	47.736	112.419	48.7874	0
chr1_94833064_94833066_+	12	5	7	4	2	7	1	15	4	20	7	12	7	26	7	15	7	19	9	16	9	20	2	0	16	30	182.648	23.4895	30.0163	8.27945	48.3454	312.514	124.347	600.024	11.6349	104.839	29.5713	69.5955	17.6961	95.6227	15.2733	61.255	14.3607	52.8239	17.6687	47.736	25.2942	97.5748	14.3947
chr3_123704132_123704201_+	2	0	20	1	2	0	0	0	28	3	39	3	60	4	48	7	71	6	84	8	58	4	2	0	17	0	30.4414	0	85.7607	2.06986	48.3454	0	0	0	81.4446	15.7258	164.754	17.3989	151.681	14.7112	104.731	28.5857	145.658	16.6812	164.908	23.868	163.007	19.515	14.3947
chr9_35641934_35642004_-	2	1	8	2	11	0	0	4	68	8	51	19	69	17	114	17	105	21	87	16	66	18	0	0	43	5	30.4414	4.6979	34.3043	4.13972	265.9	0	0	160.006	197.794	41.9355	215.448	110.193	174.433	62.5225	248.737	69.4223	215.41	58.3843	170.797	47.736	185.491	87.8173	0
chr14_10861033_10861038_+	2	2	10	1	4	1	3	1	49	9	29	9	58	8	73	6	75	18	80	13	60	10	0	0	27	5	30.4414	9.3958	42.8804	2.06986	96.6908	44.6449	373.042	40.0016	142.528	47.1775	122.51	52.1966	146.625	29.4224	159.279	24.502	153.864	50.0436	157.055	38.7855	168.628	48.7874	0
chr14_83456073_83456077_-	4	2	20	4	3	3	0	0	40	20	24	10	44	23	44	9	43	17	53	24	36	16	1	0	11	4	60.8828	9.3958	85.7607	8.27945	72.5181	133.935	0	0	116.349	104.839	101.387	57.9962	111.233	84.5893	96.0036	36.753	88.2156	47.2634	104.049	71.604	101.177	78.0598	7.19735
chr8_113955884_113955967_+	19	20	114	31	24	6	2	9	135	42	110	43	169	54	206	59	209	77	246	89	202	66	1	0	101	32	289.193	93.958	488.836	64.1657	580.145	267.869	248.694	360.014	392.679	220.162	464.692	249.384	427.235	198.601	449.472	240.936	428.769	214.076	482.944	265.531	567.714	321.997	7.19735
chr12_42530080_42530108_+	26	24	60	7	19	12	9	59	159	87	118	80	178	100	188	97	187	116	216	137	173	102	1	0	77	27	395.738	112.75	257.282	14.489	459.281	535.738	1119.12	2360.09	462.489	456.049	498.488	463.97	449.987	367.78	410.197	396.116	383.635	322.504	424.048	408.739	486.21	497.631	7.19735
chr20_11872434_11872526_+	28	18	29	16	4	8	0	5	30	48	19	56	33	80	43	85	26	93	52	116	38	85	0	0	26	29	426.18	84.5622	124.353	33.1178	96.6908	357.159	0	200.008	87.2621	251.613	80.265	324.779	83.4246	294.224	93.8217	347.112	53.3397	258.559	102.086	346.086	106.798	414.693	0
chr5_30456334_30456381_+	17	14	139	43	9	2	0	1	152	46	119	50	177	71	123	32	181	61	218	112	151	56	10	4	156	47	258.752	65.7706	596.037	89.0041	217.554	89.2897	0	40.0016	442.128	241.129	502.712	289.981	447.459	261.123	268.374	130.677	371.326	169.592	427.975	334.152	424.38	273.209	71.9735
chr1_148619422_148619448_+	7	8	59	21	6	2	4	7	90	50	37	29	97	51	56	30	73	57	93	54	62	37	4	1	54	19	106.545	37.5832	252.994	43.4671	145.036	89.2897	497.389	280.011	261.786	262.097	156.305	168.189	245.218	187.568	122.186	122.51	149.761	158.472	182.576	161.109	174.249	180.513	28.7894
chr19_53833909_53833998_-	9	9	47	10	7	2	0	7	61	30	71	36	97	35	118	35	96	49	150	83	108	41	0	0	34	11	136.986	42.2811	201.538	20.6986	169.209	89.2897	0	280.011	177.433	157.258	299.937	208.786	245.218	128.723	257.464	142.928	196.947	136.23	294.478	247.63	303.53	200.028	0
chr11_68377919_68378002_+	3	1	12	0	1	0	0	1	10	4	3	2	14	8	10	1	6	7	11	11	3	0	1	0	7	6	45.6621	4.6979	51.4564	0	24.1727	0	0	40.0016	29.0874	20.9678	12.6734	11.5992	35.3922	29.4224	21.819	4.08367	12.3092	19.4614	21.595	32.8185	8.4314	0	7.19735
chr2_140456585_140456586_-	2	0	8	1	2	1	1	0	14	8	11	4	23	8	28	10	24	10	27	11	14	8	0	0	10	3	30.4414	0	34.3043	2.06986	48.3454	44.6449	124.347	0	40.7223	41.9355	46.4692	23.1985	58.1444	29.4224	61.0932	40.8367	49.2366	27.802	53.006	32.8185	39.3465	39.0299	0
chr4_143969093_143969187_+	69	46	140	60	4	5	5	16	76	119	65	120	109	189	68	120	88	197	144	206	85	142	7	7	183	102	1050.23	216.103	600.325	124.192	96.6908	223.224	621.736	640.026	221.064	623.791	274.591	695.955	275.554	695.103	148.369	490.04	180.534	547.7	282.699	614.601	238.89	692.781	50.3815
chr4_48676190_48676289_-	2	2	2	1	9	7	2	5	18	26	41	44	25	32	44	57	40	75	38	54	19	57	0	0	40	25	30.4414	9.3958	8.57607	2.06986	217.554	312.514	248.694	200.008	52.3572	136.29	173.203	255.183	63.2004	117.689	96.0036	232.769	82.061	208.515	74.6011	161.109	53.3988	278.088	0
chr6_3206981_3206987_+	43	25	164	73	31	14	20	62	227	94	152	85	246	101	235	121	275	150	283	135	235	107	11	4	150	51	654.49	117.448	703.238	151.1	749.353	625.028	2486.94	2480.1	660.283	492.743	642.12	492.968	621.892	371.457	512.747	494.124	564.17	417.03	555.582	402.772	660.459	522.025	79.1709
chr5_30475949_30475978_+	24	20	157	42	10	0	2	4	182	63	138	70	202	97	155	38	181	75	218	114	176	51	12	4	147	51	365.297	93.958	673.222	86.9342	241.727	0	248.694	160.006	529.39	330.242	582.977	405.974	510.659	356.746	338.195	155.179	371.326	208.515	427.975	340.119	494.642	248.816	86.3682
chr10_86552565_86552571_+	2	1	14	3	4	1	0	2	16	10	13	4	17	8	32	12	38	10	25	10	20	10	0	0	15	3	30.4414	4.6979	60.0325	6.20959	96.6908	44.6449	0	80.0032	46.5398	52.4194	54.9181	23.1985	42.9763	29.4224	69.8208	49.004	77.958	27.802	49.0797	29.835	56.2093	48.7874	0
chr9_73878443_73878510_+	2	0	10	1	1	0	0	1	7	0	8	3	9	3	14	5	7	2	16	7	7	2	0	0	7	2	30.4414	0	42.8804	2.06986	24.1727	0	0	40.0016	20.3611	0	33.7958	17.3989	22.7522	11.0334	30.5466	20.4183	14.3607	5.56041	31.411	20.8845	19.6733	9.75748	0
chr9_74518077_74518149_+	4	2	31	15	4	1	0	4	41	23	27	12	73	33	38	20	58	43	57	32	61	11	7	1	65	19	60.8828	9.3958	132.929	31.0479	96.6908	44.6449	0	160.006	119.258	120.565	114.061	69.5955	184.545	121.367	82.9122	81.6733	118.989	119.549	111.902	95.4719	171.438	53.6661	50.3815
chr3_98089769_98089833_+	21	11	25	16	3	2	0	7	12	17	12	13	18	45	17	25	17	50	15	42	16	25	0	0	22	27	319.635	51.6769	107.201	33.1178	72.5181	89.2897	0	280.011	34.9048	89.113	50.6937	75.3951	45.5043	165.501	37.0923	102.092	34.8759	139.01	29.4478	125.307	44.9674	121.968	0
chr10_43609496_43609584_+	6	2	35	18	8	0	0	0	59	20	40	32	75	40	52	36	71	41	110	40	89	29	0	0	48	6	91.3242	9.3958	150.081	37.2575	193.382	0	0	0	171.615	104.839	168.979	185.588	189.601	147.112	113.459	147.012	145.658	113.988	215.95	119.34	250.131	141.483	0
chr1_148545485_148545516_+	5	3	33	9	4	0	0	5	44	8	12	9	50	17	39	7	55	22	61	14	43	9	2	0	19	4	76.1035	14.0937	141.505	18.6288	96.6908	0	0	200.008	127.984	41.9355	50.6937	52.1966	126.401	62.5225	85.0941	28.5857	112.834	61.1645	119.754	41.769	120.85	43.9087	14.3947
chr4_143835952_143836024_+	20	19	56	20	2	2	0	5	44	60	31	40	69	87	42	52	56	96	81	75	52	50	3	5	93	52	304.414	89.2601	240.13	41.3972	48.3454	89.2897	0	200.008	127.984	314.517	130.959	231.985	174.433	319.968	91.6398	212.351	114.885	266.899	159.018	223.762	146.144	243.937	21.5921
chr7_27859778_27859821_+	2	1	13	3	1	0	0	0	19	6	10	6	9	3	13	4	14	8	24	4	13	8	1	0	15	6	30.4414	4.6979	55.7445	6.20959	24.1727	0	0	0	55.266	31.4517	42.2447	34.7977	22.7522	11.0334	28.3647	16.3347	28.7214	22.2416	47.1165	11.934	36.536	39.0299	7.19735
chr1_94832240_94832308_+	9	7	13	2	1	2	0	3	8	15	5	17	23	34	11	16	19	30	14	19	15	18	0	0	13	18	136.986	32.8853	55.7445	4.13972	24.1727	89.2897	0	120.005	23.2699	78.6291	21.1224	98.5936	58.1444	125.045	24.0009	65.3387	38.979	83.4061	27.4846	56.6865	42.157	87.8173	0
chr3_149485382_149485458_+	9	7	27	7	4	5	2	14	38	28	28	23	36	46	57	36	69	54	53	37	44	18	0	1	27	10	136.986	32.8853	115.777	14.489	96.6908	223.224	248.694	560.022	110.532	146.774	118.285	133.391	91.0086	169.179	124.368	147.012	141.555	150.131	104.049	110.389	123.66	87.8173	0
chr10_46293151_46293155_-	3	2	32	13	9	0	0	1	42	1	42	7	50	11	62	8	48	10	79	18	50	10	1	0	33	8	45.6621	9.3958	137.217	26.9082	217.554	0	0	40.0016	122.167	5.24194	177.428	40.5974	126.401	40.4558	135.278	32.6693	98.4733	27.802	155.092	53.703	140.523	48.7874	7.19735
chr5_21996500_21996521_-	5	1	24	9	12	1	1	2	58	15	40	17	87	30	77	22	92	37	63	18	31	18	4	0	24	9	76.1035	4.6979	102.913	18.6288	290.072	44.6449	124.347	80.0032	168.707	78.6291	168.979	98.5936	219.937	110.334	168.006	89.8407	188.74	102.868	123.681	53.703	87.1244	87.8173	28.7894
chr3_116813127_116813132_+	6	2	18	5	4	2	0	1	19	7	24	6	34	12	34	18	41	20	36	14	28	15	2	0	20	4	91.3242	9.3958	77.1846	10.3493	96.6908	89.2897	0	40.0016	55.266	36.6936	101.387	34.7977	85.9526	44.1335	74.1846	73.506	84.1126	55.6041	70.6747	41.769	78.693	73.1811	14.3947
chr2_163712985_163713028_-	6	4	16	3	3	4	0	3	16	13	8	13	17	18	19	23	16	20	25	18	19	28	0	0	8	6	91.3242	18.7916	68.6086	6.20959	72.5181	178.579	0	120.005	46.5398	68.1452	33.7958	75.3951	42.9763	66.2003	41.4561	93.9243	32.8244	55.6041	49.0797	53.703	53.3988	136.605	0
chr4_152367723_152367753_+	3	1	23	7	1	0	0	0	11	3	14	7	16	7	12	3	20	6	33	11	28	4	1	0	22	3	45.6621	4.6979	98.6248	14.489	24.1727	0	0	0	31.9961	15.7258	59.1426	40.5974	40.4483	25.7446	26.1828	12.251	41.0305	16.6812	64.7851	32.8185	78.693	19.515	7.19735
chr3_59885209_59885212_-	0	1	15	3	0	0	0	0	29	1	5	1	29	0	0	3	37	2	4	2	27	3	0	0	34	2	0	4.6979	64.3205	6.20959	0	0	0	0	84.3533	5.24194	21.1224	5.79962	73.3125	0	0	12.251	75.9065	5.56041	7.85275	5.967	75.8826	14.6362	0
chr8_112643501_112643590_+	8	3	5	1	0	2	0	3	5	29	6	16	5	16	5	12	2	30	11	35	2	23	0	0	6	10	121.766	14.0937	21.4402	2.06986	0	89.2897	0	120.005	14.5437	152.016	25.3468	92.794	12.6401	58.8447	10.9095	49.004	4.10305	83.4061	21.595	104.422	5.62093	112.211	0
chr12_43747182_43747265_+	4	4	23	4	8	1	1	1	73	16	42	22	63	28	105	24	119	29	96	34	72	20	0	0	45	5	60.8828	18.7916	98.6248	8.27945	193.382	44.6449	124.347	40.0016	212.338	83.8711	177.428	127.592	159.265	102.978	229.1	98.008	244.132	80.6259	188.466	101.439	202.353	97.5748	0
chr10_59863213_59863286_+	20	19	20	7	2	1	0	5	11	85	19	78	30	128	13	73	16	161	28	166	13	111	1	0	27	59	304.414	89.2601	85.7607	14.489	48.3454	44.6449	0	200.008	31.9961	445.565	80.265	452.371	75.8405	470.758	28.3647	298.108	32.8244	447.613	54.9692	495.261	36.536	541.54	7.19735
chr19_374986_375085_-	16	15	92	37	19	3	1	5	157	51	120	42	173	70	209	67	203	71	212	92	183	63	0	0	52	20	243.531	70.4685	394.499	76.5849	459.281	133.935	124.347	200.008	456.671	267.339	506.937	243.584	437.347	257.446	456.017	273.606	416.46	197.394	416.196	274.482	514.315	307.361	0
chr1_94832897_94832983_-	14	4	7	2	6	6	6	16	17	19	21	15	22	23	28	24	14	30	14	12	11	21	6	1	39	32	213.09	18.7916	30.0163	4.13972	145.036	267.869	746.083	640.026	49.4485	99.5969	88.7139	86.9943	55.6164	84.5893	61.0932	98.008	28.7214	83.4061	27.4846	35.802	30.9151	102.454	43.1841
chr20_11691829_11691871_+	20	21	148	47	19	4	4	18	118	51	102	64	156	87	131	70	175	102	189	130	160	70	1	0	86	30	304.414	98.6559	634.629	97.2835	459.281	178.579	497.389	720.029	343.231	267.339	430.896	371.176	394.371	319.968	285.829	285.857	359.017	283.581	371.042	387.855	449.674	341.512	7.19735
chrX_56689292_56689365_-	22	17	163	43	87	13	15	10	617	119	378	129	705	172	528	130	676	201	800	234	701	206	0	1	210	30	334.855	79.8643	698.95	89.0041	2103.02	580.383	1865.21	400.016	1794.69	623.791	1596.85	748.151	1782.25	632.581	1152.04	530.877	1386.83	558.821	1570.55	698.139	1970.14	1005.02	0
chr4_143997649_143997714_+	37	25	27	17	8	6	0	24	40	130	24	100	55	174	37	139	45	181	51	178	31	148	4	4	38	78	563.166	117.448	115.777	35.1877	193.382	267.869	0	960.038	116.349	681.452	101.387	579.962	139.041	639.936	80.7303	567.63	92.3187	503.217	100.123	531.063	87.1244	722.053	28.7894
chr1_64148350_64148403_-	5	3	24	8	0	0	0	2	16	12	14	11	33	7	35	14	44	15	25	12	19	9	1	0	31	4	76.1035	14.0937	102.913	16.5589	0	0	0	80.0032	46.5398	62.9033	59.1426	63.7959	83.4246	25.7446	76.3665	57.1713	90.2671	41.703	49.0797	35.802	53.3988	43.9087	7.19735
chr9_83744339_83744427_-	22	4	15	10	10	13	1	12	35	63	30	48	38	85	43	73	45	105	55	118	20	76	0	2	8	22	334.855	18.7916	64.3205	20.6986	241.727	580.383	124.347	480.019	101.806	330.242	126.734	278.382	96.0646	312.613	93.8217	298.108	92.3187	291.921	107.975	352.053	56.2093	370.784	0
chr4_185678061_185678068_+	33	23	159	60	27	2	7	5	127	22	108	44	158	55	217	70	241	72	239	89	192	57	12	2	127	41	502.283	108.052	681.798	124.192	652.663	89.2897	870.43	200.008	369.409	115.323	456.243	255.183	399.427	202.279	473.472	285.857	494.418	200.175	469.202	265.531	539.609	278.088	86.3682
chr7_27584795_27584869_+	4	0	23	9	4	0	0	0	23	7	11	2	45	12	36	8	43	8	55	6	21	8	2	0	22	5	60.8828	0	98.6248	18.6288	96.6908	0	0	0	66.9009	36.6936	46.4692	11.5992	113.761	44.1335	78.5484	32.6693	88.2156	22.2416	107.975	17.901	59.0198	39.0299	14.3947
chr7_55588358_55588440_+	6	3	9	2	1	1	0	0	12	10	8	16	17	19	14	15	12	20	18	27	19	10	0	1	12	9	91.3242	14.0937	38.5923	4.13972	24.1727	44.6449	0	0	34.9048	52.4194	33.7958	92.794	42.9763	69.8781	30.5466	61.255	24.6183	55.6041	35.3374	80.5545	53.3988	48.7874	0
chr19_24872593_24872684_+	1	2	18	6	9	2	1	1	33	7	51	12	47	15	73	9	53	10	71	12	43	9	0	0	53	9	15.2207	9.3958	77.1846	12.4192	217.554	89.2897	124.347	40.0016	95.9883	36.6936	215.448	69.5955	118.817	55.1669	159.279	36.753	108.731	27.802	139.386	35.802	120.85	43.9087	0
chr11_84365170_84365229_+	8	8	32	11	19	3	9	34	97	48	103	57	113	60	152	93	143	88	145	89	129	51	2	0	30	19	121.766	37.5832	137.217	22.7685	459.281	133.935	1119.12	1360.05	282.147	251.613	435.121	330.579	285.666	220.668	331.649	379.781	293.368	244.658	284.662	265.531	362.55	248.816	14.3947
chr8_62389997_62390005_+	4	0	3	0	2	1	0	2	8	10	10	10	9	13	8	10	11	19	10	20	6	11	0	0	8	5	60.8828	0	12.8641	0	48.3454	44.6449	0	80.0032	23.2699	52.4194	42.2447	57.9962	22.7522	47.8113	17.4552	40.8367	22.5668	52.8239	19.6319	59.67	16.8628	53.6661	0
chr2_197234451_197234522_+	16	3	5	0	1	1	0	7	7	33	10	34	3	57	4	23	2	48	2	46	2	37	0	2	3	9	243.531	14.0937	21.4402	0	24.1727	44.6449	0	280.011	20.3611	172.984	42.2447	197.187	7.58405	209.634	8.7276	93.9243	4.10305	133.45	3.92637	137.241	5.62093	180.513	0
chr19_367758_367802_-	1	0	12	3	1	0	0	0	13	4	3	1	7	4	5	0	10	5	10	3	5	5	0	0	16	2	15.2207	0	51.4564	6.20959	24.1727	0	0	0	37.8136	20.9678	12.6734	5.79962	17.6961	14.7112	10.9095	0	20.5153	13.901	19.6319	8.95049	14.0523	24.3937	0
chr1_199300440_199300516_+	8	5	29	8	3	0	0	1	22	10	20	11	31	17	31	11	39	20	49	20	27	9	2	2	29	9	121.766	23.4895	124.353	16.5589	72.5181	0	0	40.0016	63.9922	52.4194	84.4894	63.7959	78.3685	62.5225	67.6389	44.9203	80.0095	55.6041	96.1961	59.67	75.8826	43.9087	14.3947
chr13_68732677_68732732_+	6	4	18	4	5	1	1	1	13	7	17	18	18	17	17	18	37	22	33	32	23	16	2	0	14	8	91.3242	18.7916	77.1846	8.27945	120.863	44.6449	124.347	40.0016	37.8136	36.6936	71.816	104.393	45.5043	62.5225	37.0923	73.506	75.9065	61.1645	64.7851	95.4719	64.6407	78.0598	14.3947
chr20_8881259_8881351_-	0	0	4	1	3	4	1	2	17	14	16	13	24	17	25	17	22	20	31	15	28	15	0	0	20	9	0	0	17.1521	2.06986	72.5181	178.579	124.347	80.0032	49.4485	73.3872	67.5915	75.3951	60.6724	62.5225	54.5475	69.4223	45.1336	55.6041	60.8588	44.7525	78.693	73.1811	0
chr9_78768008_78768083_-	23	19	47	20	8	3	0	6	53	51	55	50	77	96	80	71	70	114	104	115	56	78	5	1	37	27	350.076	89.2601	201.538	41.3972	193.382	133.935	0	240.01	154.163	267.339	232.346	289.981	194.657	353.068	174.552	289.94	143.607	316.943	204.171	343.102	157.386	380.542	35.9868
chr1_207353340_207353401_+	11	8	60	35	1	2	0	1	67	14	43	23	108	31	67	17	86	33	139	47	116	25	0	0	94	27	167.428	37.5832	257.282	72.4452	24.1727	89.2897	0	40.0016	194.885	73.3872	181.652	133.391	273.026	114.012	146.187	69.4223	176.431	91.7467	272.883	140.224	326.014	121.968	0
chr3_9008354_9008434_+	9	6	54	26	6	3	1	1	64	7	21	10	52	19	50	12	51	23	65	22	56	8	5	3	61	18	136.986	28.1874	231.554	53.8164	145.036	133.935	124.347	40.0016	186.159	36.6936	88.7139	57.9962	131.457	69.8781	109.095	49.004	104.628	63.9447	127.607	65.637	157.386	39.0299	35.9868
chr5_21997475_21997517_-	6	5	54	27	9	3	0	3	87	12	74	21	109	17	83	18	118	26	129	35	98	15	9	1	96	20	91.3242	23.4895	231.554	55.8863	217.554	133.935	0	120.005	253.06	62.9033	312.611	121.792	275.554	62.5225	181.098	73.506	242.08	72.2853	253.251	104.422	275.426	73.1811	64.7762
chr7_95934137_95934215_+	7	7	47	16	4	0	0	2	28	12	13	6	33	23	27	9	38	23	38	20	36	10	7	2	51	23	106.545	32.8853	201.538	33.1178	96.6908	0	0	80.0032	81.4446	62.9033	54.9181	34.7977	83.4246	84.5893	58.9113	36.753	77.958	63.9447	74.6011	59.67	101.177	48.7874	50.3815
chr1_207345615_207345617_+	4	3	30	12	0	0	0	0	21	9	11	8	27	18	17	7	21	13	34	20	28	18	4	1	39	18	60.8828	14.0937	128.641	24.8383	0	0	0	0	61.0834	47.1775	46.4692	46.397	68.2565	66.2003	37.0923	28.5857	43.082	36.1426	66.7483	59.67	78.693	87.8173	28.7894
chr3_123706357_123706363_+	6	2	54	23	16	2	5	6	59	7	62	12	75	14	87	16	102	30	117	30	108	19	0	0	37	2	91.3242	9.3958	231.554	47.6068	386.763	89.2897	621.736	240.01	171.615	36.6936	261.917	69.5955	189.601	51.4891	189.825	65.3387	209.256	83.4061	229.693	89.5049	303.53	92.696	0
chr1_207350499_207350512_+	20	15	37	19	2	0	0	3	37	36	23	38	38	50	36	32	40	51	68	80	60	54	5	3	43	27	304.414	70.4685	158.657	39.3274	48.3454	0	0	120.005	107.623	188.71	97.1628	220.386	96.0646	183.89	78.5484	130.677	82.061	141.79	133.497	238.68	168.628	263.452	35.9868
chr18_71097957_71097984_+	2	0	13	2	3	1	0	0	20	5	18	8	33	6	28	7	35	5	56	11	39	5	0	0	10	1	30.4414	0	55.7445	4.13972	72.5181	44.6449	0	0	58.1747	26.2097	76.0405	46.397	83.4246	22.0668	61.0932	28.5857	71.8034	13.901	109.938	32.8185	109.608	24.3937	0
chr1_204603480_204603577_+	1	0	6	1	0	2	0	3	3	9	0	7	4	6	2	8	7	7	12	11	15	4	0	0	10	10	15.2207	0	25.7282	2.06986	0	89.2897	0	120.005	8.72621	47.1775	0	40.5974	10.1121	22.0668	4.3638	32.6693	14.3607	19.4614	23.5582	32.8185	42.157	19.515	0
chr20_10851534_10851578_+	1	0	8	0	2	0	1	1	14	4	16	1	18	7	22	4	17	8	24	4	18	2	0	0	9	2	15.2207	0	34.3043	0	48.3454	0	124.347	40.0016	40.7223	20.9678	67.5915	5.79962	45.5043	25.7446	48.0018	16.3347	34.8759	22.2416	47.1165	11.934	50.5884	9.75748	0
chr4_143706359_143706394_+	9	7	54	23	0	1	0	4	40	22	23	19	52	27	46	21	62	47	77	40	51	25	6	2	46	17	136.986	32.8853	231.554	47.6068	0	44.6449	0	160.006	116.349	115.323	97.1628	110.193	131.457	99.3005	100.367	85.757	127.195	130.67	151.165	119.34	143.334	121.968	43.1841
chr1_64144779_64144823_-	5	1	7	2	2	0	0	2	5	2	4	10	6	9	15	3	7	9	12	8	8	8	0	0	9	5	76.1035	4.6979	30.0163	4.13972	48.3454	0	0	80.0032	14.5437	10.4839	16.8979	57.9962	15.1681	33.1002	32.7285	12.251	14.3607	25.0218	23.5582	23.868	22.4837	39.0299	0
chr1_149127229_149127314_+	10	1	39	19	0	0	0	1	48	26	19	18	61	31	54	18	52	21	93	28	69	21	2	1	35	3	152.207	4.6979	167.233	39.3274	0	0	0	40.0016	139.619	136.29	80.265	104.393	154.209	114.012	117.823	73.506	106.679	58.3843	182.576	83.538	193.922	102.454	14.3947
chr5_169516682_169516719_-	10	6	43	26	5	1	0	4	24	10	26	14	40	21	30	16	33	19	42	29	29	12	0	0	36	31	152.207	28.1874	184.386	53.8164	120.863	44.6449	0	160.006	69.8097	52.4194	109.836	81.1947	101.121	77.2337	65.457	65.3387	67.7004	52.8239	82.4538	86.5214	81.5035	58.5449	0
chr13_80234582_80234583_-	0	0	0	0	4	2	0	0	2	6	17	12	2	4	17	15	7	17	21	24	0	12	0	0	26	20	0	0	0	0	96.6908	89.2897	0	0	5.81747	31.4517	71.816	69.5955	5.05603	14.7112	37.0923	61.255	14.3607	47.2634	41.2269	71.604	0	58.5449	0
chr6_104471531_104471594_+	8	8	59	30	8	2	2	6	114	33	31	21	71	35	44	29	88	46	99	43	67	35	1	0	49	16	121.766	37.5832	252.994	62.0959	193.382	89.2897	248.694	240.01	331.596	172.984	130.959	121.792	179.489	128.723	96.0036	118.426	180.534	127.889	194.355	128.29	188.301	170.756	7.19735
chr7_37714132_37714136_+	15	13	59	34	42	6	8	17	80	34	97	50	126	62	143	67	141	91	171	75	135	59	6	2	81	38	228.311	61.0727	252.994	70.3753	1015.25	267.869	994.777	680.027	232.699	178.226	409.774	289.981	318.53	228.023	312.012	273.606	289.265	252.998	335.705	223.762	379.413	287.846	43.1841
chr4_94053363_94053365_+	2	0	4	0	0	4	0	0	1	2	1	0	2	2	0	3	2	10	5	1	1	2	0	0	5	4	30.4414	0	17.1521	0	0	178.579	0	0	2.90874	10.4839	4.22447	0	5.05603	7.35559	0	12.251	4.10305	27.802	9.81593	2.9835	2.81047	9.75748	0
chr1_149259108_149259134_+	3	1	19	7	3	0	0	3	24	10	29	7	26	15	20	8	32	8	33	11	19	7	2	0	20	5	45.6621	4.6979	81.4727	14.489	72.5181	0	0	120.005	69.8097	52.4194	122.51	40.5974	65.7284	55.1669	43.638	32.6693	65.6488	22.2416	64.7851	32.8185	53.3988	34.1512	14.3947
chr2_197236879_197236924_+	16	9	7	1	2	5	0	2	3	53	4	47	8	80	3	36	3	64	4	90	0	42	0	1	5	19	243.531	42.2811	30.0163	2.06986	48.3454	223.224	0	80.0032	8.72621	277.823	16.8979	272.582	20.2241	294.224	6.5457	147.012	6.15458	177.933	7.85275	268.515	0	204.907	0
chr4_143837783_143837838_+	28	26	85	31	1	1	0	14	73	80	30	70	78	127	50	53	72	121	91	102	56	57	6	7	98	58	426.18	122.145	364.483	64.1657	24.1727	44.6449	0	560.022	212.338	419.355	126.734	405.974	197.185	467.08	109.095	216.434	147.71	336.405	178.65	304.317	157.386	278.088	43.1841
chr7_95915090_95915145_+	5	4	28	10	3	1	1	0	34	9	15	10	30	19	18	5	35	13	44	25	26	17	2	1	22	10	76.1035	18.7916	120.065	20.6986	72.5181	44.6449	124.347	0	98.897	47.1775	63.3671	57.9962	75.8405	69.8781	39.2742	20.4183	71.8034	36.1426	86.3802	74.5875	73.0721	82.9386	14.3947
chr10_87124376_87124428_+	2	2	50	16	1	2	0	1	36	17	21	11	38	27	37	15	30	32	50	26	30	15	0	0	25	5	30.4414	9.3958	214.402	33.1178	24.1727	89.2897	0	40.0016	104.714	89.113	88.7139	63.7959	96.0646	99.3005	80.7303	61.255	61.5458	88.9665	98.1593	77.571	84.314	73.1811	0
chr1_80282047_80282119_-	63	32	17	17	4	6	1	4	20	90	20	73	21	139	24	77	28	192	30	114	7	109	1	2	26	59	958.904	150.333	72.8966	35.1877	96.6908	267.869	124.347	160.006	58.1747	471.775	84.4894	423.372	53.0884	511.214	52.3656	314.442	57.4427	533.799	58.8956	340.119	19.6733	531.783	7.19735
chr12_11537042_11537111_-	3	0	6	0	0	0	0	0	7	0	4	2	6	4	4	1	7	7	3	4	2	1	0	0	3	4	45.6621	0	25.7282	0	0	0	0	0	20.3611	0	16.8979	11.5992	15.1681	14.7112	8.7276	4.08367	14.3607	19.4614	5.88956	11.934	5.62093	4.87874	0
chr2_33867525_33867541_-	0	0	12	0	0	0	0	0	10	0	2	0	7	4	9	6	12	4	20	3	6	1	0	0	7	2	0	0	51.4564	0	0	0	0	0	29.0874	0	8.44894	0	17.6961	14.7112	19.6371	24.502	24.6183	11.1208	39.2637	8.95049	16.8628	4.87874	0
chr3_154925981_154926037_+	9	6	55	34	30	5	4	14	204	45	182	37	240	54	293	52	276	79	261	75	240	56	0	0	109	14	136.986	28.1874	235.842	70.3753	725.181	223.224	497.389	560.022	593.382	235.887	768.854	214.586	606.724	198.601	639.297	212.351	566.221	219.636	512.392	223.762	674.512	273.209	0
chr6_128871531_128871541_-	3	0	7	0	0	0	0	0	2	6	2	3	8	5	6	5	4	6	6	8	2	3	0	0	4	2	45.6621	0	30.0163	0	0	0	0	0	5.81747	31.4517	8.44894	17.3989	20.2241	18.389	13.0914	20.4183	8.2061	16.6812	11.7791	23.868	5.62093	14.6362	0
chr8_57449751_57449846_-	15	12	34	16	14	6	1	4	67	65	52	33	62	78	94	86	94	88	114	109	65	75	1	0	29	14	228.311	56.3748	145.793	33.1178	338.418	267.869	124.347	160.006	194.885	340.726	219.673	191.388	156.737	286.868	205.099	351.195	192.843	244.658	223.803	325.201	182.68	365.905	7.19735
chr18_63641556_63641600_+	3	3	17	4	0	0	0	0	22	10	13	10	16	18	20	5	16	14	27	24	11	16	0	0	13	5	45.6621	14.0937	72.8966	8.27945	0	0	0	0	63.9922	52.4194	54.9181	57.9962	40.4483	66.2003	43.638	20.4183	32.8244	38.9228	53.006	71.604	30.9151	78.0598	0
chr12_2530100_2530101_+	4	1	7	3	1	0	2	3	8	7	6	5	15	9	15	10	12	13	15	9	12	9	0	0	9	9	60.8828	4.6979	30.0163	6.20959	24.1727	0	248.694	120.005	23.2699	36.6936	25.3468	28.9981	37.9203	33.1002	32.7285	40.8367	24.6183	36.1426	29.4478	26.8515	33.7256	43.9087	0
chr7_72306215_72306217_-	1	0	8	0	1	0	0	0	24	4	13	3	21	4	30	4	24	4	25	7	17	1	0	0	9	1	15.2207	0	34.3043	0	24.1727	0	0	0	69.8097	20.9678	54.9181	17.3989	53.0884	14.7112	65.457	16.3347	49.2366	11.1208	49.0797	20.8845	47.7779	4.87874	0
chr10_83112707_83112766_-	13	8	8	1	0	6	0	11	24	62	27	66	32	54	33	107	43	64	32	136	51	56	1	0	6	20	197.869	37.5832	34.3043	2.06986	0	267.869	0	440.018	69.8097	325	114.061	382.775	80.8965	198.601	72.0027	436.952	88.2156	177.933	62.822	405.756	143.334	273.209	7.19735
chr4_143876447_143876449_+	6	5	22	11	3	1	0	5	31	35	24	18	44	32	34	23	25	35	51	39	32	41	1	0	24	22	91.3242	23.4895	94.3368	22.7685	72.5181	44.6449	0	200.008	90.1708	183.468	101.387	104.393	111.233	117.689	74.1846	93.9243	51.2882	97.3071	100.123	116.356	89.9349	200.028	7.19735
chr1_64153081_64153111_-	3	2	12	2	0	0	0	0	16	12	7	5	10	19	16	11	17	20	22	16	14	11	2	0	14	8	45.6621	9.3958	51.4564	4.13972	0	0	0	0	46.5398	62.9033	29.5713	28.9981	25.2802	69.8781	34.9104	44.9203	34.8759	55.6041	43.1901	47.736	39.3465	53.6661	14.3947
chr10_83044553_83044556_-	14	4	5	5	0	0	0	0	4	22	9	20	12	31	6	17	3	22	14	33	7	21	0	0	10	25	213.09	18.7916	21.4402	10.3493	0	0	0	0	11.6349	115.323	38.0202	115.992	30.3362	114.012	13.0914	69.4223	6.15458	61.1645	27.4846	98.4554	19.6733	102.454	0
chr18_32050107_32050144_+	11	7	25	13	2	1	0	1	39	21	26	32	42	42	22	19	36	31	46	44	33	27	3	2	33	17	167.428	32.8853	107.201	26.9082	48.3454	44.6449	0	40.0016	113.441	110.081	109.836	185.588	106.177	154.467	48.0018	77.5897	73.8549	86.1863	90.3066	131.274	92.7453	131.726	21.5921
chr9_36344881_36344976_+	4	2	4	1	0	0	0	2	8	4	3	5	11	13	13	6	5	15	14	7	5	9	0	0	10	11	60.8828	9.3958	17.1521	2.06986	0	0	0	80.0032	23.2699	20.9678	12.6734	28.9981	27.8082	47.8113	28.3647	24.502	10.2576	41.703	27.4846	20.8845	14.0523	43.9087	0
chr2_40819093_40819095_+	3	0	19	6	7	3	3	3	24	5	17	9	24	11	33	7	27	14	33	15	22	9	2	0	13	6	45.6621	0	81.4727	12.4192	169.209	133.935	373.042	120.005	69.8097	26.2097	71.816	52.1966	60.6724	40.4558	72.0027	28.5857	55.3912	38.9228	64.7851	44.7525	61.8302	43.9087	14.3947
chr10_59869404_59869498_+	34	33	20	6	0	1	0	5	8	56	4	71	11	111	10	62	10	113	15	123	1	91	1	1	10	64	517.504	155.031	85.7607	12.4192	0	44.6449	0	200.008	23.2699	293.549	16.8979	411.773	27.8082	408.235	21.819	253.187	20.5153	314.163	29.4478	366.97	2.81047	443.965	7.19735
chr3_8985838_8985885_+	3	2	27	11	0	0	1	0	18	7	9	5	27	5	11	2	27	9	23	6	12	1	0	0	19	8	45.6621	9.3958	115.777	22.7685	0	0	124.347	0	52.3572	36.6936	38.0202	28.9981	68.2565	18.389	24.0009	8.16733	55.3912	25.0218	45.1533	17.901	33.7256	4.87874	0
chr4_152361102_152361168_+	13	13	96	47	16	0	0	2	110	37	62	34	155	67	77	30	116	49	127	66	127	39	4	1	91	28	197.869	61.0727	411.651	97.2835	386.763	0	0	80.0032	319.961	193.952	261.917	197.187	391.843	246.412	168.006	122.51	237.977	136.23	249.325	196.911	356.929	190.271	28.7894
chr3_156006281_156006288_+	10	6	23	14	3	2	1	21	36	45	33	34	38	46	41	60	40	60	46	65	54	59	0	0	17	14	152.207	28.1874	98.6248	28.9781	72.5181	89.2897	124.347	840.034	104.714	235.887	139.408	197.187	96.0646	169.179	89.4579	245.02	82.061	166.812	90.3066	193.927	151.765	287.846	0
chr1_207341277_207341279_+	2	1	9	1	0	0	0	0	9	8	7	7	12	14	8	4	9	8	19	10	11	10	0	0	11	3	30.4414	4.6979	38.5923	2.06986	0	0	0	0	26.1786	41.9355	29.5713	40.5974	30.3362	51.4891	17.4552	16.3347	18.4637	22.2416	37.3005	29.835	30.9151	48.7874	0
chr10_14987783_14987881_+	11	7	33	16	1	1	0	2	26	29	24	28	43	30	29	27	32	37	46	59	29	32	4	1	28	14	167.428	32.8853	141.505	33.1178	24.1727	44.6449	0	80.0032	75.6271	152.016	101.387	162.389	108.705	110.334	63.2751	110.259	65.6488	102.868	90.3066	176.026	81.5035	156.12	28.7894
chr7_55480605_55480684_+	70	42	227	77	39	22	5	24	295	185	226	166	307	277	388	228	354	311	471	360	350	232	17	14	188	88	1065.45	197.312	973.384	159.379	942.735	982.187	621.736	960.038	858.077	969.759	954.731	962.737	776.101	1018.75	846.577	931.076	726.24	864.643	924.661	1074.06	983.663	1131.87	122.355
chr15_45730490_45730503_+	2	1	12	3	0	1	0	0	16	9	12	3	24	7	19	9	26	11	32	20	19	12	0	0	11	3	30.4414	4.6979	51.4564	6.20959	0	44.6449	0	0	46.5398	47.1775	50.6937	17.3989	60.6724	25.7446	41.4561	36.753	53.3397	30.5822	62.822	59.67	53.3988	58.5449	0
chr4_143820854_143820943_+	27	22	117	42	7	2	2	18	137	152	60	106	170	224	94	89	133	219	160	141	130	113	12	12	135	94	410.959	103.354	501.7	86.9342	169.209	89.2897	248.694	720.029	398.497	796.775	253.468	614.76	429.763	823.826	205.099	363.446	272.853	608.864	314.11	420.673	365.36	551.298	86.3682
chr4_160665262_160665265_-	8	5	14	5	5	2	0	2	15	10	14	17	12	26	29	21	15	21	19	30	16	18	1	1	13	11	121.766	23.4895	60.0325	10.3493	120.863	89.2897	0	80.0032	43.631	52.4194	59.1426	98.5936	30.3362	95.6227	63.2751	85.757	30.7729	58.3843	37.3005	89.5049	44.9674	87.8173	7.19735
chr14_66908334_66908348_+	4	0	8	0	7	2	0	2	16	28	21	19	25	36	31	30	26	32	33	54	31	27	2	1	8	11	60.8828	0	34.3043	0	169.209	89.2897	0	80.0032	46.5398	146.774	88.7139	110.193	63.2004	132.401	67.6389	122.51	53.3397	88.9665	64.7851	161.109	87.1244	131.726	14.3947
chr6_104483014_104483083_+	9	6	61	29	2	3	0	1	82	28	33	10	20	5	20	6	30	8	41	11	25	6	0	0	25	5	136.986	28.1874	261.57	60.026	48.3454	133.935	0	40.0016	238.516	146.774	139.408	57.9962	50.5603	18.389	43.638	24.502	61.5458	22.2416	80.4906	32.8185	70.2616	29.2724	0
chr8_48957114_48957115_-	1	3	17	3	12	3	4	1	35	15	37	12	36	13	45	17	44	20	43	21	37	14	1	0	26	9	15.2207	14.0937	72.8966	6.20959	290.072	133.935	497.389	40.0016	101.806	78.6291	156.305	69.5955	91.0086	47.8113	98.1855	69.4223	90.2671	55.6041	84.417	62.6535	103.987	68.3023	7.19735
chr10_89574492_89574494_-	4	4	8	2	4	1	0	3	13	16	11	7	19	17	11	17	15	18	18	21	21	20	0	0	13	15	60.8828	18.7916	34.3043	4.13972	96.6908	44.6449	0	120.005	37.8136	83.8711	46.4692	40.5974	48.0323	62.5225	24.0009	69.4223	30.7729	50.0436	35.3374	62.6535	59.0198	97.5748	0
chr15_59760333_59760429_-	0	1	14	1	1	2	0	0	15	13	9	2	18	6	9	9	14	11	18	15	9	4	0	0	11	3	0	4.6979	60.0325	2.06986	24.1727	89.2897	0	0	43.631	68.1452	38.0202	11.5992	45.5043	22.0668	19.6371	36.753	28.7214	30.5822	35.3374	44.7525	25.2942	19.515	0
chr10_86720909_86720997_-	7	4	5	1	1	1	0	1	0	21	4	15	5	23	3	21	10	27	7	37	5	30	0	0	6	15	106.545	18.7916	21.4402	2.06986	24.1727	44.6449	0	40.0016	0	110.081	16.8979	86.9943	12.6401	84.5893	6.5457	85.757	20.5153	75.0655	13.7423	110.389	14.0523	146.362	0
chr1_64172561_64172563_+	0	0	5	0	0	0	0	0	3	0	0	2	8	0	0	2	7	0	0	0	6	0	0	0	10	0	0	0	21.4402	0	0	0	0	0	8.72621	0	0	11.5992	20.2241	0	0	8.16733	14.3607	0	0	0	16.8628	0	0
chr4_143845362_143845433_+	19	18	100	38	2	1	1	12	87	55	36	39	98	65	72	41	89	83	118	81	95	59	5	6	107	42	289.193	84.5622	428.804	78.6548	48.3454	44.6449	124.347	480.019	253.06	288.307	152.081	226.185	247.746	239.057	157.097	167.43	182.586	230.757	231.656	241.663	266.994	287.846	35.9868
chr1_94823751_94823839_+	10	7	9	4	1	0	0	6	8	23	1	20	16	36	10	18	12	49	19	32	7	22	2	1	17	24	152.207	32.8853	38.5923	8.27945	24.1727	0	0	240.01	23.2699	120.565	4.22447	115.992	40.4483	132.401	21.819	73.506	24.6183	136.23	37.3005	95.4719	19.6733	107.332	14.3947
chr10_89577807_89577886_-	10	6	21	5	5	0	1	5	26	11	16	19	26	14	30	13	39	20	26	22	20	18	0	0	35	4	152.207	28.1874	90.0488	10.3493	120.863	0	124.347	200.008	75.6271	57.6614	67.5915	110.193	65.7284	51.4891	65.457	53.0877	80.0095	55.6041	51.0428	65.637	56.2093	87.8173	0
chr3_34193145_34193230_-	15	12	111	65	18	2	0	4	155	37	110	39	176	32	230	56	214	56	251	61	169	38	4	0	83	24	228.311	56.3748	475.972	134.541	435.108	89.2897	0	160.006	450.854	193.952	464.692	226.185	444.931	117.689	501.837	228.685	439.027	155.691	492.76	181.993	474.969	185.392	28.7894
chr16_87961105_87961135_-	4	1	16	7	3	2	0	0	35	7	19	2	42	8	62	3	54	8	37	4	31	8	0	0	15	3	60.8828	4.6979	68.6086	14.489	72.5181	89.2897	0	0	101.806	36.6936	80.265	11.5992	106.177	29.4224	135.278	12.251	110.782	22.2416	72.6379	11.934	87.1244	39.0299	0
chr4_79789484_79789580_+	2	1	27	10	14	2	3	4	101	17	82	15	94	20	148	31	138	39	135	28	116	20	0	0	38	1	30.4414	4.6979	115.777	20.6986	338.418	89.2897	373.042	160.006	293.782	89.113	346.407	86.9943	237.634	73.5559	322.921	126.594	283.111	108.428	265.03	83.538	326.014	97.5748	0
chr7_55504189_55504273_+	26	18	24	10	0	0	0	4	15	19	12	26	18	42	16	25	18	45	20	63	21	26	2	3	22	22	395.738	84.5622	102.913	20.6986	0	0	0	160.006	43.631	99.5969	50.6937	150.79	45.5043	154.467	34.9104	102.092	36.9275	125.109	39.2637	187.96	59.0198	126.847	14.3947
chr5_135348872_135348896_-	4	6	82	28	24	3	1	5	235	23	122	18	193	33	222	30	238	40	274	42	199	31	1	0	63	6	60.8828	28.1874	351.619	57.9561	580.145	133.935	124.347	200.008	683.553	120.565	515.386	104.393	487.907	121.367	484.382	122.51	488.263	111.208	537.913	125.307	559.283	151.241	7.19735
chr6_136773467_136773546_-	11	3	46	11	10	0	3	2	78	17	75	19	90	28	121	18	125	35	132	39	81	24	6	2	37	5	167.428	14.0937	197.25	22.7685	241.727	0	373.042	80.0032	226.881	89.113	316.835	110.193	227.522	102.978	264.01	73.506	256.441	97.3071	259.141	116.356	227.648	117.09	43.1841
chr14_83457675_83457676_-	0	1	1	0	2	0	0	0	5	3	4	5	8	7	11	3	6	8	9	12	6	5	0	0	31	10	0	4.6979	4.28804	0	48.3454	0	0	0	14.5437	15.7258	16.8979	28.9981	20.2241	25.7446	24.0009	12.251	12.3092	22.2416	17.6687	35.802	16.8628	24.3937	0
chr7_116126011_116126014_-	11	4	32	15	3	1	3	3	51	34	15	20	47	26	44	26	48	35	54	31	43	22	4	2	28	10	167.428	18.7916	137.217	31.0479	72.5181	44.6449	373.042	120.005	148.346	178.226	63.3671	115.992	118.817	95.6227	96.0036	106.175	98.4733	97.3071	106.012	92.4884	120.85	107.332	28.7894
chr7_117385154_117385230_-	8	5	15	11	15	8	1	17	36	47	58	46	45	54	60	74	49	83	70	86	50	64	0	0	31	15	121.766	23.4895	64.3205	22.7685	362.59	357.159	124.347	680.027	104.714	246.371	245.019	266.783	113.761	198.601	130.914	302.191	100.525	230.757	137.423	256.581	140.523	312.239	0
chr6_3212903_3212953_+	19	20	36	20	4	3	3	13	40	42	15	53	63	80	30	32	44	72	44	68	40	32	4	3	55	41	289.193	93.958	154.369	41.3972	96.6908	133.935	373.042	520.021	116.349	220.162	63.3671	307.38	159.265	294.224	65.457	130.677	90.2671	200.175	86.3802	202.878	112.419	156.12	28.7894
chr9_36301845_36301881_+	4	2	11	4	0	0	0	1	6	2	5	4	7	5	10	3	6	11	16	11	6	3	0	0	8	6	60.8828	9.3958	47.1684	8.27945	0	0	0	40.0016	17.4524	10.4839	21.1224	23.1985	17.6961	18.389	21.819	12.251	12.3092	30.5822	31.411	32.8185	16.8628	14.6362	0
chr7_95945295_95945297_+	3	1	11	3	0	0	0	1	6	2	3	3	7	2	11	3	6	7	15	4	11	1	0	0	8	3	45.6621	4.6979	47.1684	6.20959	0	0	0	40.0016	17.4524	10.4839	12.6734	17.3989	17.6961	7.35559	24.0009	12.251	12.3092	19.4614	29.4478	11.934	30.9151	4.87874	0
chr7_1376550_1376627_+	14	15	85	46	30	8	9	15	216	58	167	55	244	90	263	98	264	111	316	98	262	88	1	0	104	47	213.09	70.4685	364.483	95.2137	725.181	357.159	1119.12	600.024	628.287	304.033	705.487	318.979	616.836	331.002	573.84	400.199	541.603	308.603	620.367	292.383	736.342	429.329	7.19735
chr1_212788333_212788356_-	11	10	31	11	1	3	1	7	25	36	26	36	41	48	41	44	38	59	62	70	42	58	3	0	19	19	167.428	46.979	132.929	22.7685	24.1727	133.935	124.347	280.011	72.7184	188.71	109.836	208.786	103.649	176.534	89.4579	179.681	77.958	164.032	121.718	208.845	118.04	282.967	21.5921
chr18_73825593_73825602_+	3	2	15	4	2	0	0	0	5	6	2	17	14	9	9	9	11	12	17	25	18	13	0	1	10	6	45.6621	9.3958	64.3205	8.27945	48.3454	0	0	0	14.5437	31.4517	8.44894	98.5936	35.3922	33.1002	19.6371	36.753	22.5668	33.3624	33.3742	74.5875	50.5884	63.4236	0
chr8_86702212_86702266_-	15	17	55	18	7	1	0	8	25	12	28	12	25	17	37	29	27	19	37	24	25	18	2	0	42	14	228.311	79.8643	235.842	37.2575	169.209	44.6449	0	320.013	72.7184	62.9033	118.285	69.5955	63.2004	62.5225	80.7303	118.426	55.3912	52.8239	72.6379	71.604	70.2616	87.8173	14.3947
chr4_152372989_152373088_+	6	6	61	26	0	0	0	2	37	14	31	7	52	10	46	5	48	23	63	15	45	5	2	2	52	10	91.3242	28.1874	261.57	53.8164	0	0	0	80.0032	107.623	73.3872	130.959	40.5974	131.457	36.778	100.367	20.4183	98.4733	63.9447	123.681	44.7525	126.471	24.3937	14.3947
chr7_12466045_12466064_-	11	2	5	0	0	0	0	2	2	27	3	26	9	38	3	17	2	28	6	32	1	21	0	2	0	21	167.428	9.3958	21.4402	0	0	0	0	80.0032	5.81747	141.532	12.6734	150.79	22.7522	139.756	6.5457	69.4223	4.10305	77.8457	11.7791	95.4719	2.81047	102.454	0
chr8_112669261_112669321_+	21	16	11	7	4	2	0	4	6	74	11	71	14	89	11	49	16	92	28	142	16	75	1	6	25	49	319.635	75.1664	47.1684	14.489	96.6908	89.2897	0	160.006	17.4524	387.904	46.4692	411.773	35.3922	327.324	24.0009	200.1	32.8244	255.779	54.9692	423.657	44.9674	365.905	7.19735
chr6_26365865_26365914_+	17	14	69	19	4	2	1	3	49	22	36	26	60	36	77	31	69	41	101	53	65	28	5	4	42	16	258.752	65.7706	295.874	39.3274	96.6908	89.2897	124.347	120.005	142.528	115.323	152.081	150.79	151.681	132.401	168.006	126.594	141.555	113.988	198.282	158.125	182.68	136.605	35.9868
chrX_12921564_12921589_-	2	3	19	6	0	0	2	2	26	10	21	7	29	14	34	11	39	18	39	15	27	12	0	0	17	9	30.4414	14.0937	81.4727	12.4192	0	0	248.694	80.0032	75.6271	52.4194	88.7139	40.5974	73.3125	51.4891	74.1846	44.9203	80.0095	50.0436	76.5643	44.7525	75.8826	58.5449	0
chr14_77952521_77952523_+	12	3	7	2	0	0	0	1	4	9	2	12	4	16	3	11	1	24	4	23	4	7	0	2	2	14	182.648	14.0937	30.0163	4.13972	0	0	0	40.0016	11.6349	47.1775	8.44894	69.5955	10.1121	58.8447	6.5457	44.9203	2.05153	66.7249	7.85275	68.6205	11.2419	34.1512	0
chr4_143887450_143887543_+	13	11	23	17	1	2	1	9	38	73	28	36	57	87	39	44	50	92	52	77	31	49	5	4	48	45	197.869	51.6769	98.6248	35.1877	24.1727	89.2897	124.347	360.014	110.532	382.662	118.285	208.786	144.097	319.968	85.0941	179.681	102.576	255.779	102.086	229.729	87.1244	239.058	35.9868
chr3_4560942_4560964_+	0	1	3	0	1	0	1	1	30	9	27	8	42	13	63	13	70	14	60	25	55	14	0	0	29	4	0	4.6979	12.8641	0	24.1727	0	124.347	40.0016	87.2621	47.1775	114.061	46.397	106.177	47.8113	137.46	53.0877	143.607	38.9228	117.791	74.5875	154.576	68.3023	0
chr9_62224045_62224135_+	42	21	17	9	6	19	1	13	36	152	37	147	61	223	46	211	52	233	68	226	23	209	4	7	13	51	639.269	98.6559	72.8966	18.6288	145.036	848.252	124.347	520.021	104.714	796.775	156.305	852.545	154.209	820.148	100.367	861.654	106.679	647.787	133.497	674.271	64.6407	1019.66	28.7894
chr20_1554296_1554300_-	11	4	0	0	2	0	0	1	3	23	1	11	3	27	1	19	1	27	0	8	0	17	0	0	3	25	167.428	18.7916	0	0	48.3454	0	0	40.0016	8.72621	120.565	4.22447	63.7959	7.58405	99.3005	2.1819	77.5897	2.05153	75.0655	0	23.868	0	82.9386	0
chr7_142224298_142224359_-	2	0	4	0	1	1	0	0	8	2	7	1	10	2	10	4	12	8	8	5	7	1	0	0	8	3	30.4414	0	17.1521	0	24.1727	44.6449	0	0	23.2699	10.4839	29.5713	5.79962	25.2802	7.35559	21.819	16.3347	24.6183	22.2416	15.7055	14.9175	19.6733	4.87874	0
chr10_59871278_59871280_+	14	10	12	6	0	0	0	3	5	14	3	17	9	31	1	29	4	32	9	42	9	24	0	0	8	29	213.09	46.979	51.4564	12.4192	0	0	0	120.005	14.5437	73.3872	12.6734	98.5936	22.7522	114.012	2.1819	118.426	8.2061	88.9665	17.6687	125.307	25.2942	117.09	0
chr14_77931903_77931948_+	24	33	92	31	20	4	1	12	91	92	63	84	130	104	124	96	122	153	188	136	123	125	0	0	79	42	365.297	155.031	394.499	64.1657	483.454	178.579	124.347	480.019	264.695	482.259	266.142	487.168	328.642	382.491	270.556	392.032	250.286	425.371	369.079	405.756	345.687	609.842	0
chr4_143877373_143877411_+	30	29	73	38	6	1	0	8	51	96	66	70	83	145	61	77	70	134	114	137	69	104	11	5	105	118	456.621	136.239	313.027	78.6548	145.036	44.6449	0	320.013	148.346	503.226	278.815	405.974	209.825	533.28	133.096	314.442	143.607	372.547	223.803	408.739	193.922	507.389	79.1709
chr8_44970977_44970989_-	7	1	3	0	0	2	0	1	3	5	4	6	5	15	9	4	4	20	1	17	3	6	0	0	1	5	106.545	4.6979	12.8641	0	0	89.2897	0	40.0016	8.72621	26.2097	16.8979	34.7977	12.6401	55.1669	19.6371	16.3347	8.2061	55.6041	1.96319	50.7195	8.4314	29.2724	0
chr19_14554779_14554809_-	5	0	5	2	1	1	0	1	7	11	7	5	3	21	24	16	10	15	20	30	12	17	1	0	7	10	76.1035	0	21.4402	4.13972	24.1727	44.6449	0	40.0016	20.3611	57.6614	29.5713	28.9981	7.58405	77.2337	52.3656	65.3387	20.5153	41.703	39.2637	89.5049	33.7256	82.9386	7.19735
chr3_149487260_149487356_+	12	16	41	17	5	5	0	12	69	61	42	44	80	75	81	89	108	122	100	63	75	57	2	0	49	23	182.648	75.1664	175.809	35.1877	120.863	223.224	0	480.019	200.703	319.758	177.428	255.183	202.241	275.835	176.734	363.446	221.565	339.185	196.319	187.96	210.785	278.088	14.3947
chr12_35266570_35266605_+	1	1	4	0	2	2	0	1	0	10	5	6	6	23	7	20	2	19	6	16	6	11	0	0	9	12	15.2207	4.6979	17.1521	0	48.3454	89.2897	0	40.0016	0	52.4194	21.1224	34.7977	15.1681	84.5893	15.2733	81.6733	4.10305	52.8239	11.7791	47.736	16.8628	53.6661	0
chr1_207112797_207112885_+	3	2	31	16	4	3	3	7	59	17	54	17	76	20	78	21	66	21	82	26	85	18	0	0	26	10	45.6621	9.3958	132.929	33.1178	96.6908	133.935	373.042	280.011	171.615	89.113	228.121	98.5936	192.129	73.5559	170.188	85.757	135.401	58.3843	160.981	77.571	238.89	87.8173	0
chr9_110309838_110309914_+	0	0	11	2	0	0	0	0	8	1	5	3	11	2	7	1	13	1	14	1	6	1	0	0	13	2	0	0	47.1684	4.13972	0	0	0	0	23.2699	5.24194	21.1224	17.3989	27.8082	7.35559	15.2733	4.08367	26.6698	2.7802	27.4846	2.9835	16.8628	4.87874	0
chr7_12952635_12952639_-	3	1	9	0	1	2	0	1	7	7	4	4	11	6	12	12	9	5	18	10	16	10	0	0	3	1	45.6621	4.6979	38.5923	0	24.1727	89.2897	0	40.0016	20.3611	36.6936	16.8979	23.1985	27.8082	22.0668	26.1828	49.004	18.4637	13.901	35.3374	29.835	44.9674	48.7874	0
chr4_75385625_75385717_+	14	12	60	20	8	2	1	5	47	30	51	44	88	56	91	41	71	53	99	89	71	39	13	1	55	26	213.09	56.3748	257.282	41.3972	193.382	89.2897	124.347	200.008	136.711	157.258	215.448	255.183	222.465	205.957	198.553	167.43	145.658	147.351	194.355	265.531	199.543	190.271	93.5656
chr6_104472623_104472683_+	18	13	64	33	5	5	1	3	94	39	40	37	77	53	41	42	73	51	87	54	70	27	8	4	63	22	273.973	61.0727	274.434	68.3054	120.863	223.224	124.347	120.005	273.421	204.436	168.979	214.586	194.657	194.923	89.4579	171.514	149.761	141.79	170.797	161.109	196.733	131.726	57.5788
chr7_95916533_95916595_+	5	6	35	11	3	0	0	0	29	12	17	11	29	14	15	7	23	11	28	18	36	12	2	0	22	9	76.1035	28.1874	150.081	22.7685	72.5181	0	0	0	84.3533	62.9033	71.816	63.7959	73.3125	51.4891	32.7285	28.5857	47.1851	30.5822	54.9692	53.703	101.177	58.5449	14.3947
chrX_55580900_55580904_-	0	0	12	1	0	0	0	1	10	6	4	4	10	4	9	4	8	4	8	3	11	3	0	0	7	3	0	0	51.4564	2.06986	0	0	0	40.0016	29.0874	31.4517	16.8979	23.1985	25.2802	14.7112	19.6371	16.3347	16.4122	11.1208	15.7055	8.95049	30.9151	14.6362	0
chr1_265316036_265316115_-	2	0	14	5	0	0	0	0	7	2	11	8	6	2	10	5	5	4	9	7	9	7	1	0	13	3	30.4414	0	60.0325	10.3493	0	0	0	0	20.3611	10.4839	46.4692	46.397	15.1681	7.35559	21.819	20.4183	10.2576	11.1208	17.6687	20.8845	25.2942	34.1512	7.19735
chr2_154668855_154668857_+	2	2	10	1	0	1	0	1	10	2	7	6	12	7	16	6	11	7	20	19	17	6	0	0	11	4	30.4414	9.3958	42.8804	2.06986	0	44.6449	0	40.0016	29.0874	10.4839	29.5713	34.7977	30.3362	25.7446	34.9104	24.502	22.5668	19.4614	39.2637	56.6865	47.7779	29.2724	0
chr3_105660670_105660671_-	2	0	5	0	0	1	0	2	7	4	2	8	3	10	5	5	6	10	8	14	3	3	0	0	5	3	30.4414	0	21.4402	0	0	44.6449	0	80.0032	20.3611	20.9678	8.44894	46.397	7.58405	36.778	10.9095	20.4183	12.3092	27.802	15.7055	41.769	8.4314	14.6362	0
chr7_54876921_54876947_-	5	0	2	0	2	0	0	0	2	6	3	3	4	9	7	6	4	10	3	10	5	8	0	0	4	4	76.1035	0	8.57607	0	48.3454	0	0	0	5.81747	31.4517	12.6734	17.3989	10.1121	33.1002	15.2733	24.502	8.2061	27.802	5.88956	29.835	14.0523	39.0299	0
chr19_53841136_53841196_+	1	0	14	5	1	0	0	0	10	6	16	0	19	5	12	3	23	7	27	13	18	4	0	0	13	3	15.2207	0	60.0325	10.3493	24.1727	0	0	0	29.0874	31.4517	67.5915	0	48.0323	18.389	26.1828	12.251	47.1851	19.4614	53.006	38.7855	50.5884	19.515	0
chr3_123968656_123968687_+	2	0	7	3	0	2	0	2	18	3	35	9	16	8	25	10	14	9	22	14	19	8	2	0	21	6	30.4414	0	30.0163	6.20959	0	89.2897	0	80.0032	52.3572	15.7258	147.857	52.1966	40.4483	29.4224	54.5475	40.8367	28.7214	25.0218	43.1901	41.769	53.3988	39.0299	14.3947
chr14_85601710_85601713_-	1	0	13	3	1	0	0	0	9	5	15	7	13	4	10	2	10	1	21	1	15	0	1	0	11	3	15.2207	0	55.7445	6.20959	24.1727	0	0	0	26.1786	26.2097	63.3671	40.5974	32.8642	14.7112	21.819	8.16733	20.5153	2.7802	41.2269	2.9835	42.157	0	7.19735
chr4_149764120_149764122_-	6	2	8	4	0	1	0	1	3	11	2	5	5	8	7	14	9	19	10	24	3	18	1	0	10	8	91.3242	9.3958	34.3043	8.27945	0	44.6449	0	40.0016	8.72621	57.6614	8.44894	28.9981	12.6401	29.4224	15.2733	57.1713	18.4637	52.8239	19.6319	71.604	8.4314	87.8173	7.19735
chr5_30459924_30459970_+	10	12	105	42	9	0	0	4	195	48	102	28	194	55	137	39	203	60	215	69	204	47	9	2	145	26	152.207	56.3748	450.244	86.9342	217.554	0	0	160.006	567.203	251.613	430.896	162.389	490.435	202.279	298.92	159.263	416.46	166.812	422.085	205.861	573.335	229.301	64.7762
chr2_197203542_197203599_+	14	6	4	3	0	0	0	1	2	22	3	18	6	33	2	21	5	32	5	35	5	18	0	0	4	22	213.09	28.1874	17.1521	6.20959	0	0	0	40.0016	5.81747	115.323	12.6734	104.393	15.1681	121.367	4.3638	85.757	10.2576	88.9665	9.81593	104.422	14.0523	87.8173	0
chr7_95935714_95935781_+	2	3	22	9	0	0	0	0	9	4	11	2	12	6	16	3	16	7	20	13	8	3	1	0	24	11	30.4414	14.0937	94.3368	18.6288	0	0	0	0	26.1786	20.9678	46.4692	11.5992	30.3362	22.0668	34.9104	12.251	32.8244	19.4614	39.2637	38.7855	22.4837	14.6362	7.19735
chr7_12395120_12395123_-	10	1	1	0	4	1	0	2	8	16	2	14	3	31	3	18	3	29	3	18	2	23	0	0	0	9	152.207	4.6979	4.28804	0	96.6908	44.6449	0	80.0032	23.2699	83.8711	8.44894	81.1947	7.58405	114.012	6.5457	73.506	6.15458	80.6259	5.88956	53.703	5.62093	112.211	0
chr10_40873194_40873262_-	2	2	19	8	4	2	0	4	29	9	29	9	39	9	51	8	42	18	56	24	42	11	0	0	19	5	30.4414	9.3958	81.4727	16.5589	96.6908	89.2897	0	160.006	84.3533	47.1775	122.51	52.1966	98.5927	33.1002	111.277	32.6693	86.1641	50.0436	109.938	71.604	118.04	53.6661	0
chr19_39616761_39616821_-	0	0	9	0	4	1	0	1	19	0	19	5	13	2	26	9	20	12	34	3	26	5	0	0	7	4	0	0	38.5923	0	96.6908	44.6449	0	40.0016	55.266	0	80.265	28.9981	32.8642	7.35559	56.7294	36.753	41.0305	33.3624	66.7483	8.95049	73.0721	24.3937	0
chr13_107827415_107827483_+	19	9	12	6	2	1	0	5	7	47	6	22	12	59	18	35	11	57	18	58	5	41	1	2	5	20	289.193	42.2811	51.4564	12.4192	48.3454	44.6449	0	200.008	20.3611	246.371	25.3468	127.592	30.3362	216.99	39.2742	142.928	22.5668	158.472	35.3374	173.043	14.0523	200.028	7.19735
chr7_55575913_55575959_+	2	0	3	0	2	0	0	1	6	10	2	2	5	13	6	9	9	21	11	16	11	12	0	0	5	4	30.4414	0	12.8641	0	48.3454	0	0	40.0016	17.4524	52.4194	8.44894	11.5992	12.6401	47.8113	13.0914	36.753	18.4637	58.3843	21.595	47.736	30.9151	58.5449	0
chr7_95940920_95941008_+	1	1	12	0	0	0	0	0	10	4	6	1	15	4	16	3	10	7	16	2	7	4	0	0	4	5	15.2207	4.6979	51.4564	0	0	0	0	0	29.0874	20.9678	25.3468	5.79962	37.9203	14.7112	34.9104	12.251	20.5153	19.4614	31.411	5.967	19.6733	19.515	0
chr3_44092364_44092422_+	10	8	42	23	1	1	0	3	53	38	34	31	54	44	28	16	50	46	70	57	61	43	10	1	52	20	152.207	37.5832	180.098	47.6068	24.1727	44.6449	0	120.005	154.163	199.194	143.632	179.788	136.513	161.823	61.0932	65.3387	102.576	127.889	137.423	170.059	171.438	209.786	71.9735
chr7_116124576_116124654_-	28	22	127	81	12	4	5	9	129	38	111	50	176	79	112	44	137	70	182	71	128	41	12	0	152	49	426.18	103.354	544.581	167.659	290.072	178.579	621.736	360.014	375.227	199.194	468.916	289.981	444.931	290.546	244.373	179.681	281.059	194.614	357.3	211.828	359.74	200.028	86.3682
chr5_63306170_63306251_-	11	4	3	3	6	2	0	2	5	31	3	16	7	39	13	34	10	47	18	37	2	32	0	0	6	20	167.428	18.7916	12.8641	6.20959	145.036	89.2897	0	80.0032	14.5437	162.5	12.6734	92.794	17.6961	143.434	28.3647	138.845	20.5153	130.67	35.3374	110.389	5.62093	156.12	0
chr2_173735281_173735310_-	2	0	15	5	4	1	1	1	42	1	25	6	34	7	71	6	63	12	52	6	47	2	0	0	23	0	30.4414	0	64.3205	10.3493	96.6908	44.6449	124.347	40.0016	122.167	5.24194	105.612	34.7977	85.9526	25.7446	154.915	24.502	129.246	33.3624	102.086	17.901	132.092	9.75748	0
chr1_212913302_212913314_+	3	1	10	2	0	2	1	0	0	4	3	5	8	5	4	9	7	11	4	7	5	4	0	0	4	9	45.6621	4.6979	42.8804	4.13972	0	89.2897	124.347	0	0	20.9678	12.6734	28.9981	20.2241	18.389	8.7276	36.753	14.3607	30.5822	7.85275	20.8845	14.0523	19.515	0
chr1_87421514_87421570_+	1	1	20	8	4	1	1	0	33	11	19	11	40	17	48	18	38	19	62	14	45	13	1	0	24	6	15.2207	4.6979	85.7607	16.5589	96.6908	44.6449	124.347	0	95.9883	57.6614	80.265	63.7959	101.121	62.5225	104.731	73.506	77.958	52.8239	121.718	41.769	126.471	63.4236	7.19735
chr1_64153224_64153287_-	13	14	42	25	7	0	1	2	44	26	36	32	51	61	64	34	70	57	90	55	61	37	5	5	84	41	197.869	65.7706	180.098	51.7465	169.209	0	124.347	80.0032	127.984	136.29	152.081	185.588	128.929	224.346	139.642	138.845	143.607	158.472	176.687	164.092	171.438	180.513	35.9868
chr12_34850470_34850487_+	15	15	41	21	21	15	16	39	111	35	114	44	125	43	133	78	138	65	130	74	120	57	1	0	43	14	228.311	70.4685	175.809	43.4671	507.626	669.673	1989.55	1560.06	322.87	183.468	481.59	255.183	316.002	158.145	290.193	318.526	283.111	180.713	255.214	220.779	337.256	278.088	7.19735
chr9_52596736_52596738_-	7	3	11	5	3	1	0	1	12	6	5	3	13	13	8	4	11	11	20	13	11	7	1	0	6	7	106.545	14.0937	47.1684	10.3493	72.5181	44.6449	0	40.0016	34.9048	31.4517	21.1224	17.3989	32.8642	47.8113	17.4552	16.3347	22.5668	30.5822	39.2637	38.7855	30.9151	34.1512	7.19735
chr1_207332425_207332479_+	4	1	7	5	0	0	0	0	17	4	10	9	27	9	22	6	35	7	27	8	20	12	0	0	24	7	60.8828	4.6979	30.0163	10.3493	0	0	0	0	49.4485	20.9678	42.2447	52.1966	68.2565	33.1002	48.0018	24.502	71.8034	19.4614	53.006	23.868	56.2093	58.5449	0
chr8_46788568_46788639_+	6	0	2	0	1	2	0	1	1	13	1	6	4	17	4	20	5	29	1	19	2	20	0	0	2	4	91.3242	0	8.57607	0	24.1727	89.2897	0	40.0016	2.90874	68.1452	4.22447	34.7977	10.1121	62.5225	8.7276	81.6733	10.2576	80.6259	1.96319	56.6865	5.62093	97.5748	0
chr9_42194751_42194783_-	2	1	8	1	11	1	1	0	60	8	47	9	64	13	70	13	93	15	87	17	82	13	0	0	13	2	30.4414	4.6979	34.3043	2.06986	265.9	44.6449	124.347	0	174.524	41.9355	198.55	52.1966	161.793	47.8113	152.733	53.0877	190.792	41.703	170.797	50.7195	230.458	63.4236	0
chr1_207344658_207344669_+	3	1	6	1	1	1	0	1	15	17	9	15	26	20	24	10	24	23	29	14	21	15	0	0	5	6	45.6621	4.6979	25.7282	2.06986	24.1727	44.6449	0	40.0016	43.631	89.113	38.0202	86.9943	65.7284	73.5559	52.3656	40.8367	49.2366	63.9447	56.9324	41.769	59.0198	73.1811	0
chr9_10520713_10520730_+	0	0	0	0	2	2	0	4	21	20	19	10	21	16	34	23	36	25	34	20	21	18	0	0	26	12	0	0	0	0	48.3454	89.2897	0	160.006	61.0834	104.839	80.265	57.9962	53.0884	58.8447	74.1846	93.9243	73.8549	69.5051	66.7483	59.67	59.0198	87.8173	0
chr10_59867761_59867821_+	20	8	10	3	0	1	0	2	9	37	7	29	14	79	9	58	8	84	12	104	4	49	1	4	3	31	304.414	37.5832	42.8804	6.20959	0	44.6449	0	80.0032	26.1786	193.952	29.5713	168.189	35.3922	290.546	19.6371	236.853	16.4122	233.537	23.5582	310.284	11.2419	239.058	7.19735
chr16_19626932_19626935_-	0	2	0	0	23	5	2	7	75	34	96	39	94	42	130	51	112	59	140	71	97	49	0	0	55	21	0	9.3958	0	0	555.972	223.224	248.694	280.011	218.155	178.226	405.549	226.185	237.634	154.467	283.647	208.267	229.771	164.032	274.846	211.828	272.615	239.058	0
chr9_62220306_62220344_+	23	10	10	6	0	1	0	3	5	61	8	48	12	96	12	50	12	86	4	89	4	59	2	1	5	28	350.076	46.979	42.8804	12.4192	0	44.6449	0	120.005	14.5437	319.758	33.7958	278.382	30.3362	353.068	26.1828	204.183	24.6183	239.097	7.85275	265.531	11.2419	287.846	14.3947
chr3_76320681_76320765_-	9	4	18	11	0	1	1	5	13	12	5	7	11	24	11	27	10	20	15	22	8	11	1	0	12	11	136.986	18.7916	77.1846	22.7685	0	44.6449	124.347	200.008	37.8136	62.9033	21.1224	40.5974	27.8082	88.2671	24.0009	110.259	20.5153	55.6041	29.4478	65.637	22.4837	53.6661	7.19735
chr1_167658294_167658384_+	1	0	18	6	4	2	1	0	28	4	24	1	27	2	46	4	28	7	36	8	27	6	0	0	10	3	15.2207	0	77.1846	12.4192	96.6908	89.2897	124.347	0	81.4446	20.9678	101.387	5.79962	68.2565	7.35559	100.367	16.3347	57.4427	19.4614	70.6747	23.868	75.8826	29.2724	0
chr16_19619543_19619544_-	1	1	7	0	0	0	0	0	6	1	5	1	8	1	2	1	5	4	5	6	10	6	0	0	9	2	15.2207	4.6979	30.0163	0	0	0	0	0	17.4524	5.24194	21.1224	5.79962	20.2241	3.6778	4.3638	4.08367	10.2576	11.1208	9.81593	17.901	28.1047	29.2724	0
chr10_64312383_64312412_-	70	59	327	112	64	20	23	22	766	242	383	138	613	220	766	208	683	250	747	245	633	226	26	3	321	76	1065.45	277.176	1402.19	231.825	1547.05	892.897	2859.99	880.035	2228.09	1268.55	1617.97	800.348	1549.67	809.115	1671.34	849.403	1401.19	695.051	1466.5	730.957	1779.02	1102.6	187.131
chr15_937388_937479_+	18	12	19	13	1	11	1	12	28	65	17	53	33	108	40	80	45	113	43	87	20	64	4	2	30	27	273.973	56.3748	81.4727	26.9082	24.1727	491.093	124.347	480.019	81.4446	340.726	71.816	307.38	83.4246	397.202	87.276	326.693	92.3187	314.163	84.417	259.564	56.2093	312.239	28.7894
chr10_59868001_59868075_+	22	13	9	1	0	2	0	5	8	54	17	48	9	65	8	60	4	101	10	118	8	59	3	1	8	38	334.855	61.0727	38.5923	2.06986	0	89.2897	0	200.008	23.2699	283.065	71.816	278.382	22.7522	239.057	17.4552	245.02	8.2061	280.8	19.6319	352.053	22.4837	287.846	21.5921
chr12_11534044_11534114_-	2	0	9	3	1	0	0	1	9	7	3	5	9	11	9	5	10	8	9	12	7	6	0	0	8	6	30.4414	0	38.5923	6.20959	24.1727	0	0	40.0016	26.1786	36.6936	12.6734	28.9981	22.7522	40.4558	19.6371	20.4183	20.5153	22.2416	17.6687	35.802	19.6733	29.2724	0
chr6_73127905_73127998_+	2	1	16	6	3	1	1	2	20	4	12	6	21	2	17	6	25	4	32	7	31	5	0	0	11	3	30.4414	4.6979	68.6086	12.4192	72.5181	44.6449	124.347	80.0032	58.1747	20.9678	50.6937	34.7977	53.0884	7.35559	37.0923	24.502	51.2882	11.1208	62.822	20.8845	87.1244	24.3937	0
chr13_68738335_68738406_+	1	3	25	3	1	1	0	1	25	5	16	4	39	18	32	11	38	14	37	9	34	5	3	0	26	8	15.2207	14.0937	107.201	6.20959	24.1727	44.6449	0	40.0016	72.7184	26.2097	67.5915	23.1985	98.5927	66.2003	69.8208	44.9203	77.958	38.9228	72.6379	26.8515	95.5558	24.3937	21.5921
chr19_311963_312043_-	5	10	66	21	7	1	0	0	74	16	53	22	67	30	97	33	103	26	145	57	89	26	4	0	53	13	76.1035	46.979	283.01	43.4671	169.209	44.6449	0	0	215.246	83.8711	223.897	127.592	169.377	110.334	211.644	134.761	211.307	72.2853	284.662	170.059	250.131	126.847	28.7894
chr4_152343620_152343623_+	14	12	64	46	18	6	6	9	91	30	92	30	108	37	118	39	126	40	130	39	114	33	1	0	46	13	213.09	56.3748	274.434	95.2137	435.108	267.869	746.083	360.014	264.695	157.258	388.651	173.989	273.026	136.078	257.464	159.263	258.492	111.208	255.214	116.356	320.393	160.998	7.19735
chr14_85600455_85600552_-	33	21	228	78	5	6	2	7	151	63	127	55	228	104	138	43	200	86	261	99	186	61	23	4	181	28	502.283	98.6559	977.672	161.449	120.863	267.869	248.694	280.011	439.219	330.242	536.508	318.979	576.388	382.491	301.102	175.598	410.305	239.097	512.392	295.366	522.746	297.603	165.539
chr1_95078861_95078863_+	49	31	18	13	11	10	1	15	11	78	20	62	18	90	24	112	35	116	25	89	5	70	4	2	18	69	745.814	145.635	77.1846	26.9082	265.9	446.449	124.347	600.024	31.9961	408.871	84.4894	359.577	45.5043	331.002	52.3656	457.371	71.8034	322.504	49.0797	265.531	14.0523	341.512	28.7894
chr4_143921435_143921438_+	2	1	6	3	0	0	0	0	4	8	9	3	7	8	5	3	7	9	10	5	5	4	0	0	14	8	30.4414	4.6979	25.7282	6.20959	0	0	0	0	11.6349	41.9355	38.0202	17.3989	17.6961	29.4224	10.9095	12.251	14.3607	25.0218	19.6319	14.9175	14.0523	19.515	0
chr2_192541297_192541313_-	0	1	22	5	5	0	1	1	27	4	30	1	37	2	43	8	64	8	62	5	33	5	1	0	16	2	0	4.6979	94.3368	10.3493	120.863	0	124.347	40.0016	78.5359	20.9678	126.734	5.79962	93.5366	7.35559	93.8217	32.6693	131.298	22.2416	121.718	14.9175	92.7453	24.3937	7.19735
chr20_1560728_1560767_-	52	61	101	38	27	25	7	48	153	181	112	161	165	203	157	234	185	257	192	266	146	192	5	0	93	101	791.476	286.572	433.092	78.6548	652.663	1116.12	870.43	1920.08	445.037	948.791	473.141	933.739	417.123	746.593	342.558	955.578	379.532	714.512	376.932	793.611	410.328	936.718	35.9868
chr4_152363986_152364069_+	16	11	72	48	3	1	0	0	54	23	62	35	63	41	56	21	82	42	95	75	62	30	8	4	91	32	243.531	51.6769	308.739	99.3534	72.5181	44.6449	0	0	157.072	120.565	261.917	202.987	159.265	150.79	122.186	85.757	168.225	116.769	186.503	223.762	174.249	146.362	57.5788
chr18_32176174_32176219_+	0	2	18	4	0	0	0	0	16	5	11	0	14	7	9	3	18	4	23	3	9	6	1	0	22	6	0	9.3958	77.1846	8.27945	0	0	0	0	46.5398	26.2097	46.4692	0	35.3922	25.7446	19.6371	12.251	36.9275	11.1208	45.1533	8.95049	25.2942	29.2724	7.19735
chr1_84207982_84207984_-	4	2	6	1	1	0	0	0	7	6	1	4	6	8	4	5	6	9	5	11	6	9	0	0	7	5	60.8828	9.3958	25.7282	2.06986	24.1727	0	0	0	20.3611	31.4517	4.22447	23.1985	15.1681	29.4224	8.7276	20.4183	12.3092	25.0218	9.81593	32.8185	16.8628	43.9087	0
chr5_122287832_122287918_+	3	0	6	2	0	0	0	0	4	3	1	1	7	4	8	0	5	2	5	1	1	1	0	0	6	5	45.6621	0	25.7282	4.13972	0	0	0	0	11.6349	15.7258	4.22447	5.79962	17.6961	14.7112	17.4552	0	10.2576	5.56041	9.81593	2.9835	2.81047	4.87874	0
chr10_95733527_95733611_-	4	2	9	2	2	0	0	1	3	12	0	11	5	16	11	16	11	36	18	88	16	33	0	0	4	9	60.8828	9.3958	38.5923	4.13972	48.3454	0	0	40.0016	8.72621	62.9033	0	63.7959	12.6401	58.8447	24.0009	65.3387	22.5668	100.087	35.3374	262.548	44.9674	160.998	0
chr3_159070419_159070454_+	0	0	0	0	9	3	0	4	35	12	49	17	36	11	63	23	45	26	60	27	36	14	0	0	24	11	0	0	0	0	217.554	133.935	0	160.006	101.806	62.9033	206.999	98.5936	91.0086	40.4558	137.46	93.9243	92.3187	72.2853	117.791	80.5545	101.177	68.3023	0
chr5_136937664_136937668_-	1	0	15	4	6	0	2	1	52	10	40	2	44	8	82	10	76	10	61	6	46	9	2	0	21	0	15.2207	0	64.3205	8.27945	145.036	0	248.694	40.0016	151.254	52.4194	168.979	11.5992	111.233	29.4224	178.916	40.8367	155.916	27.802	119.754	17.901	129.281	43.9087	14.3947
chr1_207351658_207351659_+	8	10	22	12	4	4	1	1	24	24	22	25	29	39	22	24	29	33	28	32	27	27	3	0	38	29	121.766	46.979	94.3368	24.8383	96.6908	178.579	124.347	40.0016	69.8097	125.807	92.9384	144.991	73.3125	143.434	48.0018	98.008	59.4943	91.7467	54.9692	95.4719	75.8826	131.726	21.5921
chr12_46160610_46160677_+	2	1	9	2	1	0	0	0	13	4	11	3	16	7	17	7	23	5	16	7	19	6	0	0	7	5	30.4414	4.6979	38.5923	4.13972	24.1727	0	0	0	37.8136	20.9678	46.4692	17.3989	40.4483	25.7446	37.0923	28.5857	47.1851	13.901	31.411	20.8845	53.3988	29.2724	0
chr10_71386245_71386271_+	6	6	49	21	5	0	1	1	57	3	43	10	58	10	112	9	105	11	108	16	74	11	2	0	33	5	91.3242	28.1874	210.114	43.4671	120.863	0	124.347	40.0016	165.798	15.7258	181.652	57.9962	146.625	36.778	244.373	36.753	215.41	30.5822	212.024	47.736	207.974	53.6661	14.3947
chr6_128891375_128891433_-	3	2	7	1	2	0	0	1	13	4	6	3	8	7	6	2	8	9	16	11	3	2	0	0	8	5	45.6621	9.3958	30.0163	2.06986	48.3454	0	0	40.0016	37.8136	20.9678	25.3468	17.3989	20.2241	25.7446	13.0914	8.16733	16.4122	25.0218	31.411	32.8185	8.4314	9.75748	0
chr1_94795396_94795431_+	3	2	3	1	1	2	0	2	2	15	3	22	14	29	11	19	10	30	11	25	15	21	0	0	8	15	45.6621	9.3958	12.8641	2.06986	24.1727	89.2897	0	80.0032	5.81747	78.6291	12.6734	127.592	35.3922	106.656	24.0009	77.5897	20.5153	83.4061	21.595	74.5875	42.157	102.454	0
chr1_84205054_84205129_-	3	0	7	2	0	2	0	0	2	4	1	1	4	5	3	0	1	5	7	8	2	4	1	0	7	8	45.6621	0	30.0163	4.13972	0	89.2897	0	0	5.81747	20.9678	4.22447	5.79962	10.1121	18.389	6.5457	0	2.05153	13.901	13.7423	23.868	5.62093	19.515	7.19735
chr5_22037336_22037431_-	17	15	135	65	18	1	2	10	237	66	173	51	304	98	228	61	309	108	322	127	245	82	21	6	180	58	258.752	70.4685	578.885	134.541	435.108	44.6449	248.694	400.016	689.37	345.968	730.834	295.781	768.517	360.424	497.473	249.104	633.922	300.262	632.146	378.904	688.564	400.057	151.144
chr1_204842314_204842316_+	3	0	1	0	0	0	0	1	5	7	3	4	1	4	4	6	2	7	2	6	2	6	0	0	4	10	45.6621	0	4.28804	0	0	0	0	40.0016	14.5437	36.6936	12.6734	23.1985	2.52802	14.7112	8.7276	24.502	4.10305	19.4614	3.92637	17.901	5.62093	29.2724	0
chr5_169366426_169366493_-	1	3	24	4	2	1	1	0	20	7	15	4	14	2	27	2	28	7	33	6	29	5	0	0	26	3	15.2207	14.0937	102.913	8.27945	48.3454	44.6449	124.347	0	58.1747	36.6936	63.3671	23.1985	35.3922	7.35559	58.9113	8.16733	57.4427	19.4614	64.7851	17.901	81.5035	24.3937	0
chr8_61306728_61306784_-	5	2	37	18	2	2	1	0	58	9	25	7	40	15	69	11	58	19	84	25	52	14	6	0	30	10	76.1035	9.3958	158.657	37.2575	48.3454	89.2897	124.347	0	168.707	47.1775	105.612	40.5974	101.121	55.1669	150.551	44.9203	118.989	52.8239	164.908	74.5875	146.144	68.3023	43.1841
chr7_95835615_95835664_+	8	10	39	18	2	0	0	2	39	20	30	18	48	27	44	22	48	28	60	29	39	16	2	0	39	13	121.766	46.979	167.233	37.2575	48.3454	0	0	80.0032	113.441	104.839	126.734	104.393	121.345	99.3005	96.0036	89.8407	98.4733	77.8457	117.791	86.5214	109.608	78.0598	14.3947
chr3_56146325_56146400_-	3	0	14	8	1	0	0	1	22	12	16	6	38	17	16	6	30	12	45	14	18	11	0	0	15	4	45.6621	0	60.0325	16.5589	24.1727	0	0	40.0016	63.9922	62.9033	67.5915	34.7977	96.0646	62.5225	34.9104	24.502	61.5458	33.3624	88.3434	41.769	50.5884	53.6661	0
chr5_148233893_148233895_+	4	1	16	10	1	0	0	0	17	8	8	5	23	13	19	8	21	9	21	15	22	12	0	0	15	7	60.8828	4.6979	68.6086	20.6986	24.1727	0	0	0	49.4485	41.9355	33.7958	28.9981	58.1444	47.8113	41.4561	32.6693	43.082	25.0218	41.2269	44.7525	61.8302	58.5449	0
chr17_85596551_85596554_-	4	5	26	13	2	0	0	0	19	5	20	7	26	12	19	13	25	14	27	21	32	10	2	0	31	11	60.8828	23.4895	111.489	26.9082	48.3454	0	0	0	55.266	26.2097	84.4894	40.5974	65.7284	44.1335	41.4561	53.0877	51.2882	38.9228	53.006	62.6535	89.9349	48.7874	14.3947
chr6_2771109_2771112_-	5	1	20	11	5	0	0	2	32	16	23	14	39	16	42	15	35	19	36	20	33	18	0	0	12	3	76.1035	4.6979	85.7607	22.7685	120.863	0	0	80.0032	93.0795	83.8711	97.1628	81.1947	98.5927	58.8447	91.6398	61.255	71.8034	52.8239	70.6747	59.67	92.7453	87.8173	0
chr1_85599043_85599070_+	5	2	56	36	12	0	1	0	79	6	70	6	74	8	211	21	158	18	161	9	95	8	0	0	68	1	76.1035	9.3958	240.13	74.515	290.072	0	124.347	0	229.79	31.4517	295.713	34.7977	187.073	29.4224	460.381	85.757	324.141	50.0436	316.073	26.8515	266.994	39.0299	0
chr10_86721547_86721641_-	3	0	4	0	0	0	0	0	4	8	1	9	6	17	2	9	2	18	3	19	0	10	0	0	1	9	45.6621	0	17.1521	0	0	0	0	0	11.6349	41.9355	4.22447	52.1966	15.1681	62.5225	4.3638	36.753	4.10305	50.0436	5.88956	56.6865	0	48.7874	0
chr19_53838436_53838500_+	3	5	48	15	9	4	2	6	135	25	55	17	132	35	113	26	154	28	219	42	141	25	1	0	27	5	45.6621	23.4895	205.826	31.0479	217.554	178.579	248.694	240.01	392.679	131.049	232.346	98.5936	333.698	128.723	246.555	106.175	315.935	77.8457	429.938	125.307	396.276	121.968	7.19735
chr12_2531514_2531602_+	80	37	132	64	31	19	2	52	95	109	113	124	120	135	152	101	101	130	154	124	111	83	27	1	127	116	1217.66	173.822	566.021	132.471	749.353	848.252	248.694	2080.08	276.33	571.372	477.365	719.153	303.362	496.502	331.649	412.45	207.204	361.426	302.331	369.954	311.962	404.935	194.328
chr4_160631598_160631602_-	3	0	2	1	0	1	0	1	3	9	3	8	2	14	5	9	4	15	4	13	3	14	0	0	5	10	45.6621	0	8.57607	2.06986	0	44.6449	0	40.0016	8.72621	47.1775	12.6734	46.397	5.05603	51.4891	10.9095	36.753	8.2061	41.703	7.85275	38.7855	8.4314	68.3023	0
chr1_207357676_207357689_+	12	14	34	23	0	1	0	0	39	28	22	30	40	42	31	24	35	39	49	42	45	26	0	0	40	34	182.648	65.7706	145.793	47.6068	0	44.6449	0	0	113.441	146.774	92.9384	173.989	101.121	154.467	67.6389	98.008	71.8034	108.428	96.1961	125.307	126.471	126.847	0
chr12_12047064_12047071_+	32	40	122	59	71	19	23	29	229	74	227	63	271	73	372	110	359	126	283	88	285	80	8	1	178	81	487.062	187.916	523.14	122.122	1716.26	848.252	2859.99	1160.05	666.1	387.904	958.955	365.376	685.093	268.479	811.667	449.203	736.498	350.306	555.582	262.548	800.983	390.299	57.5788
chr1_149267858_149267941_+	3	2	19	11	3	1	0	3	42	9	22	5	42	17	52	11	68	20	44	16	27	9	2	0	28	7	45.6621	9.3958	81.4727	22.7685	72.5181	44.6449	0	120.005	122.167	47.1775	92.9384	28.9981	106.177	62.5225	113.459	44.9203	139.504	55.6041	86.3802	47.736	75.8826	43.9087	14.3947
chr6_3239018_3239043_+	12	6	18	3	3	3	1	7	16	31	50	28	43	39	31	24	33	54	35	36	19	21	6	2	26	14	182.648	28.1874	77.1846	6.20959	72.5181	133.935	124.347	280.011	46.5398	162.5	211.224	162.389	108.705	143.434	67.6389	98.008	67.7004	150.131	68.7115	107.406	53.3988	102.454	43.1841
chr18_32053587_32053629_+	3	2	13	6	1	1	0	0	10	7	6	8	11	17	8	5	11	7	19	7	13	9	0	1	16	8	45.6621	9.3958	55.7445	12.4192	24.1727	44.6449	0	0	29.0874	36.6936	25.3468	46.397	27.8082	62.5225	17.4552	20.4183	22.5668	19.4614	37.3005	20.8845	36.536	43.9087	0
chr10_67752676_67752757_+	2	0	5	2	2	0	1	1	16	16	3	11	18	20	9	18	10	35	14	24	10	13	0	0	9	8	30.4414	0	21.4402	4.13972	48.3454	0	124.347	40.0016	46.5398	83.8711	12.6734	63.7959	45.5043	73.5559	19.6371	73.506	20.5153	97.3071	27.4846	71.604	28.1047	63.4236	0
chr1_158846635_158846713_+	1	1	21	0	7	0	0	0	38	1	43	3	31	7	42	10	47	8	54	8	49	6	0	0	1	1	15.2207	4.6979	90.0488	0	169.209	0	0	0	110.532	5.24194	181.652	17.3989	78.3685	25.7446	91.6398	40.8367	96.4217	22.2416	106.012	23.868	137.713	29.2724	0
chr10_46062567_46062628_+	5	2	14	4	2	0	1	0	18	3	7	6	14	6	13	4	11	8	12	10	10	4	3	0	16	4	76.1035	9.3958	60.0325	8.27945	48.3454	0	124.347	0	52.3572	15.7258	29.5713	34.7977	35.3922	22.0668	28.3647	16.3347	22.5668	22.2416	23.5582	29.835	28.1047	19.515	21.5921
chr4_143963600_143963682_+	89	84	194	97	25	10	1	49	218	357	97	272	335	441	160	297	240	463	306	445	222	334	19	13	269	192	1354.64	394.624	831.879	200.777	604.317	446.449	124.347	1960.08	634.104	1871.37	409.774	1577.5	846.886	1621.91	349.104	1212.85	492.366	1287.23	600.735	1327.66	623.923	1629.5	136.75
chr1_76757672_76757707_-	5	0	8	4	0	0	0	1	6	5	2	1	8	5	4	6	15	8	9	4	5	2	2	0	12	6	76.1035	0	34.3043	8.27945	0	0	0	40.0016	17.4524	26.2097	8.44894	5.79962	20.2241	18.389	8.7276	24.502	30.7729	22.2416	17.6687	11.934	14.0523	9.75748	14.3947
chr1_94814436_94814482_+	4	3	3	1	2	2	0	10	9	26	4	29	10	26	11	24	0	36	7	37	11	19	1	1	13	22	60.8828	14.0937	12.8641	2.06986	48.3454	89.2897	0	400.016	26.1786	136.29	16.8979	168.189	25.2802	95.6227	24.0009	98.008	0	100.087	13.7423	110.389	30.9151	92.696	7.19735
chr1_163481027_163481096_-	1	0	13	3	0	1	0	1	16	1	5	1	15	2	22	3	25	7	24	2	16	1	0	0	7	1	15.2207	0	55.7445	6.20959	0	44.6449	0	40.0016	46.5398	5.24194	21.1224	5.79962	37.9203	7.35559	48.0018	12.251	51.2882	19.4614	47.1165	5.967	44.9674	4.87874	0
chr3_106264346_106264358_+	1	0	3	0	0	3	0	1	1	0	2	0	8	1	4	4	7	4	7	4	4	1	0	0	6	3	15.2207	0	12.8641	0	0	133.935	0	40.0016	2.90874	0	8.44894	0	20.2241	3.6778	8.7276	16.3347	14.3607	11.1208	13.7423	11.934	11.2419	4.87874	0
chr1_148781493_148781547_+	12	13	58	22	4	1	0	3	44	35	30	40	58	34	44	37	40	51	86	84	52	40	12	5	59	37	182.648	61.0727	248.706	45.537	96.6908	44.6449	0	120.005	127.984	183.468	126.734	231.985	146.625	125.045	96.0036	151.096	82.061	141.79	168.834	250.614	146.144	195.15	86.3682
chr12_19752119_19752180_-	20	27	111	61	14	2	0	3	91	76	103	77	145	95	149	97	136	111	214	184	178	116	3	1	70	48	304.414	126.843	475.972	126.262	338.418	89.2897	0	120.005	264.695	398.388	435.121	446.571	366.562	349.391	325.103	396.116	279.008	308.603	420.122	548.964	500.263	565.934	21.5921
chr9_110321972_110322055_+	1	0	12	2	1	0	0	0	12	1	5	4	9	3	3	1	12	1	2	6	7	1	0	0	4	1	15.2207	0	51.4564	4.13972	24.1727	0	0	0	34.9048	5.24194	21.1224	23.1985	22.7522	11.0334	6.5457	4.08367	24.6183	2.7802	3.92637	17.901	19.6733	4.87874	0
chr9_62212184_62212244_+	12	3	4	4	4	5	0	3	12	29	9	19	16	37	14	41	14	57	16	34	7	35	0	0	4	12	182.648	14.0937	17.1521	8.27945	96.6908	223.224	0	120.005	34.9048	152.016	38.0202	110.193	40.4483	136.078	30.5466	167.43	28.7214	158.472	31.411	101.439	19.6733	170.756	0
chr12_35296756_35296809_+	56	37	19	12	4	4	1	12	11	89	17	74	30	155	21	78	21	143	29	120	10	94	4	6	16	64	852.359	173.822	81.4727	24.8383	96.6908	178.579	124.347	480.019	31.9961	466.533	71.816	429.172	75.8405	570.058	45.8199	318.526	43.082	397.569	56.9324	358.02	28.1047	458.601	28.7894
chr11_84367294_84367366_+	7	4	15	9	0	0	0	3	8	14	21	18	17	30	21	15	25	29	21	19	11	21	1	3	23	13	106.545	18.7916	64.3205	18.6288	0	0	0	120.005	23.2699	73.3872	88.7139	104.393	42.9763	110.334	45.8199	61.255	51.2882	80.6259	41.2269	56.6865	30.9151	102.454	7.19735
chr2_140445422_140445521_-	17	16	57	40	5	2	0	4	64	44	39	35	87	57	62	53	84	94	89	63	64	27	4	2	46	24	258.752	75.1664	244.418	82.7945	120.863	89.2897	0	160.006	186.159	230.645	164.754	202.987	219.937	209.634	135.278	216.434	172.328	261.339	174.724	187.96	179.87	131.726	28.7894
chr18_32062208_32062282_+	4	0	19	12	0	0	1	2	9	12	29	9	17	11	9	7	14	13	26	14	8	9	1	0	17	10	60.8828	0	81.4727	24.8383	0	0	124.347	80.0032	26.1786	62.9033	122.51	52.1966	42.9763	40.4558	19.6371	28.5857	28.7214	36.1426	51.0428	41.769	22.4837	43.9087	7.19735
chr10_57567945_57568001_-	4	6	15	1	3	3	0	13	24	6	40	7	31	13	66	24	65	22	60	13	40	20	0	0	18	9	60.8828	28.1874	64.3205	2.06986	72.5181	133.935	0	520.021	69.8097	31.4517	168.979	40.5974	78.3685	47.8113	144.005	98.008	133.349	61.1645	117.791	38.7855	112.419	97.5748	0
chr9_83757359_83757457_-	11	5	11	2	6	5	3	4	20	39	16	16	16	55	30	45	21	61	28	63	8	38	0	1	1	10	167.428	23.4895	47.1684	4.13972	145.036	223.224	373.042	160.006	58.1747	204.436	67.5915	92.794	40.4483	202.279	65.457	183.765	43.082	169.592	54.9692	187.96	22.4837	185.392	0
chr1_158921561_158921616_+	1	0	12	1	3	0	1	0	10	6	5	12	19	15	16	14	18	13	19	33	17	9	0	0	2	2	15.2207	0	51.4564	2.06986	72.5181	0	124.347	0	29.0874	31.4517	21.1224	69.5955	48.0323	55.1669	34.9104	57.1713	36.9275	36.1426	37.3005	98.4554	47.7779	43.9087	0
chr13_96313861_96313901_+	0	2	21	1	1	0	1	2	50	3	28	2	46	2	45	6	46	5	63	8	58	13	0	0	12	1	0	9.3958	90.0488	2.06986	24.1727	0	124.347	80.0032	145.437	15.7258	118.285	11.5992	116.289	7.35559	98.1855	24.502	94.3702	13.901	123.681	23.868	163.007	63.4236	0
chr6_110022050_110022114_+	8	9	45	24	9	0	1	5	87	52	47	36	126	48	72	42	125	89	114	54	76	44	4	1	36	16	121.766	42.2811	192.962	49.6767	217.554	0	124.347	200.008	253.06	272.581	198.55	208.786	318.53	176.534	157.097	171.514	256.441	247.438	223.803	161.109	213.595	214.665	28.7894
chr4_161044318_161044372_+	35	26	286	87	39	13	5	25	334	151	229	145	432	194	383	179	363	179	495	278	407	193	22	5	157	34	532.725	122.145	1226.38	180.078	942.735	580.383	621.736	1000.04	971.518	791.533	967.404	840.945	1092.1	713.492	835.668	730.976	744.704	497.656	971.777	829.413	1143.86	941.597	158.342
chr6_53727035_53727055_+	0	0	1	0	3	3	0	2	36	11	30	4	26	17	54	34	56	26	57	26	36	6	0	0	24	4	0	0	4.28804	0	72.5181	133.935	0	80.0032	104.714	57.6614	126.734	23.1985	65.7284	62.5225	117.823	138.845	114.885	72.2853	111.902	77.571	101.177	29.2724	0
chr3_67926361_67926440_-	2	2	6	2	3	0	0	3	32	12	20	15	22	17	34	9	28	26	36	28	27	15	0	0	12	8	30.4414	9.3958	25.7282	4.13972	72.5181	0	0	120.005	93.0795	62.9033	84.4894	86.9943	55.6164	62.5225	74.1846	36.753	57.4427	72.2853	70.6747	83.538	75.8826	73.1811	0
chr4_161119650_161119672_+	6	5	8	3	1	0	1	5	14	17	5	16	7	14	12	34	11	33	20	57	12	37	0	0	9	9	91.3242	23.4895	34.3043	6.20959	24.1727	0	124.347	200.008	40.7223	89.113	21.1224	92.794	17.6961	51.4891	26.1828	138.845	22.5668	91.7467	39.2637	170.059	33.7256	180.513	0
chr1_207344939_207344941_+	1	2	16	7	1	1	0	1	7	6	6	6	12	3	6	5	7	4	22	9	11	14	0	0	26	9	15.2207	9.3958	68.6086	14.489	24.1727	44.6449	0	40.0016	20.3611	31.4517	25.3468	34.7977	30.3362	11.0334	13.0914	20.4183	14.3607	11.1208	43.1901	26.8515	30.9151	68.3023	0
chr9_62176736_62176770_+	19	10	4	3	2	1	0	5	7	49	6	42	11	67	6	35	8	67	13	48	4	43	0	0	5	18	289.193	46.979	17.1521	6.20959	48.3454	44.6449	0	200.008	20.3611	256.855	25.3468	243.584	27.8082	246.412	13.0914	142.928	16.4122	186.274	25.5214	143.208	11.2419	209.786	0
chr5_22001328_22001396_-	27	15	108	91	17	1	2	4	233	73	150	57	308	107	229	75	317	125	357	113	247	87	20	5	195	56	410.959	70.4685	463.108	188.357	410.936	44.6449	248.694	160.006	677.735	382.662	633.671	330.579	778.629	393.524	499.655	306.275	650.334	347.525	700.858	337.135	694.185	424.45	143.947
chr6_73233734_73233824_+	3	4	27	11	1	0	0	2	33	13	18	6	36	18	31	18	26	24	31	19	40	9	4	0	27	12	45.6621	18.7916	115.777	22.7685	24.1727	0	0	80.0032	95.9883	68.1452	76.0405	34.7977	91.0086	66.2003	67.6389	73.506	53.3397	66.7249	60.8588	56.6865	112.419	43.9087	28.7894
chr3_56166689_56166747_-	7	5	22	12	3	1	0	1	37	15	12	14	44	24	20	12	40	41	28	28	24	21	4	0	28	9	106.545	23.4895	94.3368	24.8383	72.5181	44.6449	0	40.0016	107.623	78.6291	50.6937	81.1947	111.233	88.2671	43.638	49.004	82.061	113.988	54.9692	83.538	67.4512	102.454	28.7894
chr8_104299495_104299536_-	3	1	3	0	0	0	1	0	5	0	4	1	2	2	32	7	32	14	3	2	4	1	0	0	10	4	45.6621	4.6979	12.8641	0	0	0	124.347	0	14.5437	0	16.8979	5.79962	5.05603	7.35559	69.8208	28.5857	65.6488	38.9228	5.88956	5.967	11.2419	4.87874	0
chr15_2612649_2612686_-	7	5	10	3	0	2	0	1	8	11	5	12	9	11	8	20	9	33	10	33	10	17	1	0	7	7	106.545	23.4895	42.8804	6.20959	0	89.2897	0	40.0016	23.2699	57.6614	21.1224	69.5955	22.7522	40.4558	17.4552	81.6733	18.4637	91.7467	19.6319	98.4554	28.1047	82.9386	7.19735
chr20_9899407_9899484_+	3	0	5	2	0	0	0	0	3	1	1	1	10	2	1	1	3	2	6	5	4	2	0	0	7	4	45.6621	0	21.4402	4.13972	0	0	0	0	8.72621	5.24194	4.22447	5.79962	25.2802	7.35559	2.1819	4.08367	6.15458	5.56041	11.7791	14.9175	11.2419	9.75748	0
chr1_95079061_95079094_-	9	1	2	2	2	0	0	1	2	5	0	2	1	8	4	9	2	9	0	4	1	5	3	0	15	19	136.986	4.6979	8.57607	4.13972	48.3454	0	0	40.0016	5.81747	26.2097	0	11.5992	2.52802	29.4224	8.7276	36.753	4.10305	25.0218	0	11.934	2.81047	24.3937	21.5921
chr9_47811422_47811470_-	5	2	7	4	1	3	0	2	15	15	12	14	9	15	17	19	19	18	16	24	17	11	0	0	7	8	76.1035	9.3958	30.0163	8.27945	24.1727	133.935	0	80.0032	43.631	78.6291	50.6937	81.1947	22.7522	55.1669	37.0923	77.5897	38.979	50.0436	31.411	71.604	47.7779	53.6661	0
chr19_41651170_41651246_-	2	3	17	3	2	0	0	0	12	3	8	1	10	6	11	4	16	6	23	11	15	0	0	1	19	4	30.4414	14.0937	72.8966	6.20959	48.3454	0	0	0	34.9048	15.7258	33.7958	5.79962	25.2802	22.0668	24.0009	16.3347	32.8244	16.6812	45.1533	32.8185	42.157	0	0
chr18_28600057_28600076_+	3	0	7	3	1	0	0	0	7	1	9	1	7	1	13	4	12	3	19	6	14	2	0	0	9	3	45.6621	0	30.0163	6.20959	24.1727	0	0	0	20.3611	5.24194	38.0202	5.79962	17.6961	3.6778	28.3647	16.3347	24.6183	8.34061	37.3005	17.901	39.3465	9.75748	0
chr10_11009381_11009403_-	1	0	2	0	2	1	3	0	29	7	30	1	20	3	30	10	33	13	33	12	25	8	0	0	18	2	15.2207	0	8.57607	0	48.3454	44.6449	373.042	0	84.3533	36.6936	126.734	5.79962	50.5603	11.0334	65.457	40.8367	67.7004	36.1426	64.7851	35.802	70.2616	39.0299	0
chr19_26263643_26263696_-	12	12	84	56	45	9	11	18	231	75	207	69	316	61	305	88	299	101	361	107	282	71	4	0	74	13	182.648	56.3748	360.195	115.912	1087.77	401.804	1367.82	720.029	671.918	393.146	874.466	400.174	798.853	224.346	665.48	359.363	613.406	280.8	708.71	319.234	792.551	346.39	28.7894
chr10_82585530_82585602_-	9	11	39	17	2	0	0	2	52	15	21	10	49	27	27	14	52	38	58	26	31	15	3	0	30	13	136.986	51.6769	167.233	35.1877	48.3454	0	0	80.0032	151.254	78.6291	88.7139	57.9962	123.873	99.3005	58.9113	57.1713	106.679	105.648	113.865	77.571	87.1244	73.1811	21.5921
chr7_37776924_37776982_+	2	0	3	1	0	1	0	1	8	4	7	7	15	12	13	3	14	13	11	8	5	5	0	0	10	4	30.4414	0	12.8641	2.06986	0	44.6449	0	40.0016	23.2699	20.9678	29.5713	40.5974	37.9203	44.1335	28.3647	12.251	28.7214	36.1426	21.595	23.868	14.0523	24.3937	0
chr4_152353035_152353068_+	5	10	84	30	2	0	2	0	47	13	34	14	52	26	28	16	74	21	68	41	57	26	3	1	63	12	76.1035	46.979	360.195	62.0959	48.3454	0	248.694	0	136.711	68.1452	143.632	81.1947	131.457	95.6227	61.0932	65.3387	151.813	58.3843	133.497	122.323	160.197	126.847	21.5921
chr1_207350575_207350576_+	3	0	8	3	0	0	0	2	3	1	4	6	6	5	4	2	6	2	12	7	10	3	0	0	11	2	45.6621	0	34.3043	6.20959	0	0	0	80.0032	8.72621	5.24194	16.8979	34.7977	15.1681	18.389	8.7276	8.16733	12.3092	5.56041	23.5582	20.8845	28.1047	14.6362	0
chr6_10967019_10967026_-	2	2	14	4	6	1	0	0	12	10	13	16	28	8	27	7	19	15	38	28	18	13	0	0	7	4	30.4414	9.3958	60.0325	8.27945	145.036	44.6449	0	0	34.9048	52.4194	54.9181	92.794	70.7845	29.4224	58.9113	28.5857	38.979	41.703	74.6011	83.538	50.5884	63.4236	0
chr7_116127526_116127528_-	6	8	57	11	24	2	7	6	106	26	67	25	111	38	117	36	119	43	112	39	88	30	7	2	43	13	91.3242	37.5832	244.418	22.7685	580.145	89.2897	870.43	240.01	308.326	136.29	283.04	144.991	280.61	139.756	255.282	147.012	244.132	119.549	219.877	116.356	247.321	146.362	50.3815
chr13_91565218_91565274_+	1	1	10	5	1	1	0	1	13	4	17	1	20	12	40	6	33	13	42	8	14	4	0	0	18	5	15.2207	4.6979	42.8804	10.3493	24.1727	44.6449	0	40.0016	37.8136	20.9678	71.816	5.79962	50.5603	44.1335	87.276	24.502	67.7004	36.1426	82.4538	23.868	39.3465	19.515	0
chr7_116039344_116039347_-	3	3	15	4	0	0	5	2	9	20	6	11	17	10	14	10	12	11	17	15	12	13	1	0	8	6	45.6621	14.0937	64.3205	8.27945	0	0	621.736	80.0032	26.1786	104.839	25.3468	63.7959	42.9763	36.778	30.5466	40.8367	24.6183	30.5822	33.3742	44.7525	33.7256	63.4236	7.19735
chr1_20668478_20668556_+	1	0	8	1	1	0	0	0	7	0	4	3	15	5	13	4	18	6	14	6	11	3	0	0	4	3	15.2207	0	34.3043	2.06986	24.1727	0	0	0	20.3611	0	16.8979	17.3989	37.9203	18.389	28.3647	16.3347	36.9275	16.6812	27.4846	17.901	30.9151	14.6362	0
chr15_81233997_81234095_-	4	5	20	11	0	0	0	2	8	5	13	3	13	9	11	2	7	7	19	7	9	7	1	0	25	10	60.8828	23.4895	85.7607	22.7685	0	0	0	80.0032	23.2699	26.2097	54.9181	17.3989	32.8642	33.1002	24.0009	8.16733	14.3607	19.4614	37.3005	20.8845	25.2942	34.1512	7.19735
chr12_27252970_27253011_-	0	0	1	0	4	1	0	1	25	16	19	17	22	21	47	36	22	33	39	33	41	25	0	0	18	7	0	0	4.28804	0	96.6908	44.6449	0	40.0016	72.7184	83.8711	80.265	98.5936	55.6164	77.2337	102.549	147.012	45.1336	91.7467	76.5643	98.4554	115.229	121.968	0
chr6_92457866_92457867_-	0	0	1	0	1	0	2	3	18	3	18	5	16	6	29	8	21	14	30	9	15	7	0	0	15	8	0	0	4.28804	0	24.1727	0	248.694	120.005	52.3572	15.7258	76.0405	28.9981	40.4483	22.0668	63.2751	32.6693	43.082	38.9228	58.8956	26.8515	42.157	34.1512	0
chrX_46425358_46425427_+	45	36	134	58	13	12	5	31	182	125	115	123	228	168	191	116	196	156	286	191	191	126	20	6	112	60	684.932	169.124	574.597	120.052	314.245	535.738	621.736	1240.05	529.39	655.243	485.814	713.354	576.388	617.87	416.743	473.705	402.099	433.712	561.471	569.848	536.799	614.721	143.947
chr7_27436322_27436354_+	3	6	24	5	6	1	0	0	29	15	23	17	43	26	20	11	34	25	35	26	20	13	2	2	24	15	45.6621	28.1874	102.913	10.3493	145.036	44.6449	0	0	84.3533	78.6291	97.1628	98.5936	108.705	95.6227	43.638	44.9203	69.7519	69.5051	68.7115	77.571	56.2093	63.4236	14.3947
chr2_137169615_137169651_-	1	0	7	0	0	0	0	0	7	2	3	0	5	4	11	4	11	4	16	7	7	3	0	0	5	1	15.2207	0	30.0163	0	0	0	0	0	20.3611	10.4839	12.6734	0	12.6401	14.7112	24.0009	16.3347	22.5668	11.1208	31.411	20.8845	19.6733	14.6362	0
chr15_54008664_54008746_-	30	10	9	5	4	2	0	8	16	81	15	61	21	108	16	64	28	98	17	82	10	84	3	9	10	50	456.621	46.979	38.5923	10.3493	96.6908	89.2897	0	320.013	46.5398	424.597	63.3671	353.777	53.0884	397.202	34.9104	261.355	57.4427	272.46	33.3742	244.647	28.1047	409.814	21.5921
chr4_149668872_149668881_-	9	5	4	1	0	5	0	1	6	39	3	25	13	59	5	39	4	59	4	53	3	53	0	0	2	15	136.986	23.4895	17.1521	2.06986	0	223.224	0	40.0016	17.4524	204.436	12.6734	144.991	32.8642	216.99	10.9095	159.263	8.2061	164.032	7.85275	158.125	8.4314	258.573	0
chr4_56841525_56841610_+	4	0	9	2	0	0	0	0	5	6	1	3	6	3	6	6	7	5	4	8	6	4	0	1	8	1	60.8828	0	38.5923	4.13972	0	0	0	0	14.5437	31.4517	4.22447	17.3989	15.1681	11.0334	13.0914	24.502	14.3607	13.901	7.85275	23.868	16.8628	19.515	0
chr15_5673691_5673719_+	6	5	14	4	5	0	0	1	16	21	11	10	24	26	33	26	22	31	25	27	20	21	1	0	10	5	91.3242	23.4895	60.0325	8.27945	120.863	0	0	40.0016	46.5398	110.081	46.4692	57.9962	60.6724	95.6227	72.0027	106.175	45.1336	86.1863	49.0797	80.5545	56.2093	102.454	7.19735
chr7_37782475_37782555_+	7	2	17	8	2	1	0	3	29	23	10	13	46	32	27	14	38	26	44	37	28	14	3	0	9	9	106.545	9.3958	72.8966	16.5589	48.3454	44.6449	0	120.005	84.3533	120.565	42.2447	75.3951	116.289	117.689	58.9113	57.1713	77.958	72.2853	86.3802	110.389	78.693	68.3023	21.5921
chr16_19193890_19193891_-	1	2	13	4	8	1	0	0	25	2	20	6	18	8	26	11	31	11	24	9	24	8	0	0	14	4	15.2207	9.3958	55.7445	8.27945	193.382	44.6449	0	0	72.7184	10.4839	84.4894	34.7977	45.5043	29.4224	56.7294	44.9203	63.5973	30.5822	47.1165	26.8515	67.4512	39.0299	0
chr6_104473636_104473660_+	7	8	36	21	2	1	2	2	63	28	26	19	37	18	15	23	36	27	41	39	34	24	1	0	23	16	106.545	37.5832	154.369	43.4671	48.3454	44.6449	248.694	80.0032	183.25	146.774	109.836	110.193	93.5366	66.2003	32.7285	93.9243	73.8549	75.0655	80.4906	116.356	95.5558	117.09	7.19735
chr10_46072245_46072247_+	4	1	8	4	1	0	0	1	12	1	4	3	9	7	4	4	12	6	18	4	21	0	0	0	8	4	60.8828	4.6979	34.3043	8.27945	24.1727	0	0	40.0016	34.9048	5.24194	16.8979	17.3989	22.7522	25.7446	8.7276	16.3347	24.6183	16.6812	35.3374	11.934	59.0198	0	0
chr1_94808986_94808988_+	12	12	19	13	0	4	1	6	11	18	6	22	14	19	8	29	11	34	20	26	9	23	2	4	28	38	182.648	56.3748	81.4727	26.9082	0	178.579	124.347	240.01	31.9961	94.355	25.3468	127.592	35.3922	69.8781	17.4552	118.426	22.5668	94.5269	39.2637	77.571	25.2942	112.211	14.3947
chr4_166802208_166802210_+	10	10	50	29	15	1	0	4	69	27	49	19	76	33	94	22	94	28	106	43	98	24	3	0	29	10	152.207	46.979	214.402	60.026	362.59	44.6449	0	160.006	200.703	141.532	206.999	110.193	192.129	121.367	205.099	89.8407	192.843	77.8457	208.098	128.29	275.426	117.09	21.5921
chr15_47636263_47636268_+	8	7	43	27	15	2	6	2	61	15	60	6	77	11	109	19	81	14	100	15	90	13	4	2	37	15	121.766	32.8853	184.386	55.8863	362.59	89.2897	746.083	80.0032	177.433	78.6291	253.468	34.7977	194.657	40.4558	237.827	77.5897	166.174	38.9228	196.319	44.7525	252.942	63.4236	28.7894
chr1_199304640_199304698_+	4	6	31	7	0	2	1	2	34	12	18	19	37	27	25	14	37	14	42	30	22	12	6	2	36	17	60.8828	28.1874	132.929	14.489	0	89.2897	124.347	80.0032	98.897	62.9033	76.0405	110.193	93.5366	99.3005	54.5475	57.1713	75.9065	38.9228	82.4538	89.5049	61.8302	58.5449	43.1841
chr1_95078066_95078068_+	15	8	5	5	4	6	0	9	8	35	6	36	12	38	8	37	11	49	8	35	5	42	1	0	10	26	228.311	37.5832	21.4402	10.3493	96.6908	267.869	0	360.014	23.2699	183.468	25.3468	208.786	30.3362	139.756	17.4552	151.096	22.5668	136.23	15.7055	104.422	14.0523	204.907	7.19735
chr10_57485464_57485501_+	4	1	19	11	1	1	1	0	12	5	34	6	26	9	16	7	26	12	17	16	15	8	1	0	13	4	60.8828	4.6979	81.4727	22.7685	24.1727	44.6449	124.347	0	34.9048	26.2097	143.632	34.7977	65.7284	33.1002	34.9104	28.5857	53.3397	33.3624	33.3742	47.736	42.157	39.0299	7.19735
chr10_46075797_46075799_+	3	0	11	7	0	0	0	2	11	13	5	7	14	13	9	13	11	19	12	10	9	10	0	0	11	7	45.6621	0	47.1684	14.489	0	0	0	80.0032	31.9961	68.1452	21.1224	40.5974	35.3922	47.8113	19.6371	53.0877	22.5668	52.8239	23.5582	29.835	25.2942	48.7874	0
chr1_207344875_207344876_+	3	3	11	7	0	1	0	1	16	9	12	10	23	10	13	15	20	13	27	12	31	14	0	0	21	10	45.6621	14.0937	47.1684	14.489	0	44.6449	0	40.0016	46.5398	47.1775	50.6937	57.9962	58.1444	36.778	28.3647	61.255	41.0305	36.1426	53.006	35.802	87.1244	68.3023	0
chr1_204723441_204723500_+	3	1	3	2	0	1	0	2	4	6	2	9	12	13	4	4	8	15	2	7	5	4	0	1	11	12	45.6621	4.6979	12.8641	4.13972	0	44.6449	0	80.0032	11.6349	31.4517	8.44894	52.1966	30.3362	47.8113	8.7276	16.3347	16.4122	41.703	3.92637	20.8845	14.0523	19.515	0
chr1_207346041_207346104_+	29	42	149	63	8	3	1	3	155	101	148	119	204	147	152	85	142	154	229	185	171	121	10	0	162	71	441.4	197.312	638.917	130.401	193.382	133.935	124.347	120.005	450.854	529.436	625.222	690.155	515.715	540.636	331.649	347.112	291.317	428.151	449.57	551.947	480.59	590.327	71.9735
chr8_112711542_112711629_+	41	40	22	7	1	3	0	4	11	98	13	105	20	151	13	93	16	165	20	175	6	110	6	5	24	88	624.049	187.916	94.3368	14.489	24.1727	133.935	0	160.006	31.9961	513.71	54.9181	608.96	50.5603	555.347	28.3647	379.781	32.8244	458.733	39.2637	522.112	16.8628	536.661	43.1841
chr15_59757625_59757714_-	2	1	18	3	1	0	0	0	17	8	5	7	13	17	18	6	16	16	25	12	22	9	2	2	13	10	30.4414	4.6979	77.1846	6.20959	24.1727	0	0	0	49.4485	41.9355	21.1224	40.5974	32.8642	62.5225	39.2742	24.502	32.8244	44.4832	49.0797	35.802	61.8302	43.9087	14.3947
chr3_76315075_76315082_-	17	18	19	9	3	2	4	13	31	29	25	31	43	61	48	43	45	58	55	62	30	41	3	0	29	27	258.752	84.5622	81.4727	18.6288	72.5181	89.2897	497.389	520.021	90.1708	152.016	105.612	179.788	108.705	224.346	104.731	175.598	92.3187	161.252	107.975	184.977	84.314	200.028	21.5921
chr10_43666588_43666684_+	2	2	15	8	0	0	0	2	19	7	8	0	14	4	13	4	19	8	10	4	11	3	1	0	22	5	30.4414	9.3958	64.3205	16.5589	0	0	0	80.0032	55.266	36.6936	33.7958	0	35.3922	14.7112	28.3647	16.3347	38.979	22.2416	19.6319	11.934	30.9151	14.6362	7.19735
chr14_36537906_36537933_+	5	6	17	10	8	2	2	4	78	5	72	5	81	10	135	29	121	26	96	10	83	15	0	0	46	14	76.1035	28.1874	72.8966	20.6986	193.382	89.2897	248.694	160.006	226.881	26.2097	304.162	28.9981	204.769	36.778	294.557	118.426	248.235	72.2853	188.466	29.835	233.269	73.1811	0
chr13_67900288_67900314_-	0	0	0	1	4	0	1	0	16	5	18	6	26	13	65	27	52	32	32	18	21	9	0	0	25	9	0	0	0	2.06986	96.6908	0	124.347	0	46.5398	26.2097	76.0405	34.7977	65.7284	47.8113	141.824	110.259	106.679	88.9665	62.822	53.703	59.0198	43.9087	0
chr1_94793115_94793165_-	1	0	22	4	7	2	0	1	23	20	22	15	39	19	26	21	32	21	40	27	29	15	1	0	5	5	15.2207	0	94.3368	8.27945	169.209	89.2897	0	40.0016	66.9009	104.839	92.9384	86.9943	98.5927	69.8781	56.7294	85.757	65.6488	58.3843	78.5275	80.5545	81.5035	73.1811	7.19735
chr14_21097559_21097592_-	1	4	51	13	10	1	1	0	130	23	77	14	127	29	132	22	161	31	166	39	132	26	0	0	32	3	15.2207	18.7916	218.69	26.9082	241.727	44.6449	124.347	0	378.136	120.565	325.284	81.1947	321.058	106.656	288.011	89.8407	330.296	86.1863	325.889	116.356	370.981	126.847	0
chr10_83044342_83044345_-	11	9	6	3	0	1	0	2	7	18	6	18	7	41	9	21	11	38	9	41	6	31	0	0	7	19	167.428	42.2811	25.7282	6.20959	0	44.6449	0	80.0032	20.3611	94.355	25.3468	104.393	17.6961	150.79	19.6371	85.757	22.5668	105.648	17.6687	122.323	16.8628	151.241	0
chr1_204841583_204841584_+	2	0	4	0	0	1	0	3	2	2	2	3	3	3	4	2	2	3	3	3	2	5	0	0	3	4	30.4414	0	17.1521	0	0	44.6449	0	120.005	5.81747	10.4839	8.44894	17.3989	7.58405	11.0334	8.7276	8.16733	4.10305	8.34061	5.88956	8.95049	5.62093	24.3937	0
chr12_35299059_35299114_+	71	47	39	21	9	3	0	7	28	159	27	135	53	258	28	147	43	230	42	221	24	183	3	11	15	83	1080.67	220.801	167.233	43.4671	217.554	133.935	0	280.011	81.4446	833.469	114.061	782.949	133.985	948.871	61.0932	600.299	88.2156	639.447	82.4538	659.353	67.4512	892.809	21.5921
chr10_57078916_57078946_-	14	7	44	30	17	3	3	13	59	37	71	49	83	62	116	62	115	83	113	70	79	51	11	0	43	14	213.09	32.8853	188.674	62.0959	410.936	133.935	373.042	520.021	171.615	193.952	299.937	284.182	209.825	228.023	253.1	253.187	235.926	230.757	221.84	208.845	222.027	248.816	79.1709
chr1_264398406_264398492_+	8	4	5	0	1	0	0	0	3	12	1	9	7	20	5	19	2	33	5	16	3	14	0	0	2	8	121.766	18.7916	21.4402	0	24.1727	0	0	0	8.72621	62.9033	4.22447	52.1966	17.6961	73.5559	10.9095	77.5897	4.10305	91.7467	9.81593	47.736	8.4314	68.3023	0
chr1_94833412_94833424_+	1	2	8	0	0	0	0	0	4	4	2	2	5	7	2	7	5	6	1	6	4	7	0	0	8	6	15.2207	9.3958	34.3043	0	0	0	0	0	11.6349	20.9678	8.44894	11.5992	12.6401	25.7446	4.3638	28.5857	10.2576	16.6812	1.96319	17.901	11.2419	34.1512	0
chr4_143869728_143869812_+	68	56	183	93	7	4	3	26	175	185	130	136	214	231	168	143	202	257	256	263	181	160	24	17	211	123	1035.01	263.082	784.711	192.497	169.209	178.579	373.042	1040.04	509.029	969.759	549.181	788.749	540.996	849.571	366.559	583.964	414.408	714.512	502.576	784.66	508.694	780.598	172.736
chr13_66216932_66216970_+	0	1	4	0	1	0	0	2	36	2	37	3	41	5	59	9	53	13	63	6	38	4	0	0	17	3	0	4.6979	17.1521	0	24.1727	0	0	80.0032	104.714	10.4839	156.305	17.3989	103.649	18.389	128.732	36.753	108.731	36.1426	123.681	17.901	106.798	19.515	0
chr5_169520629_169520631_-	1	0	8	0	1	0	0	1	3	3	6	1	10	3	9	2	11	4	8	7	6	4	0	0	2	3	15.2207	0	34.3043	0	24.1727	0	0	40.0016	8.72621	15.7258	25.3468	5.79962	25.2802	11.0334	19.6371	8.16733	22.5668	11.1208	15.7055	20.8845	16.8628	19.515	0
chr11_69727529_69727601_-	0	0	11	5	4	0	0	1	35	5	25	2	32	4	49	6	47	7	46	7	38	7	0	0	18	5	0	0	47.1684	10.3493	96.6908	0	0	40.0016	101.806	26.2097	105.612	11.5992	80.8965	14.7112	106.913	24.502	96.4217	19.4614	90.3066	20.8845	106.798	34.1512	0
chr8_93566470_93566476_+	2	3	22	7	5	1	1	0	34	13	30	6	42	12	39	15	35	19	46	24	36	11	4	0	25	7	30.4414	14.0937	94.3368	14.489	120.863	44.6449	124.347	0	98.897	68.1452	126.734	34.7977	106.177	44.1335	85.0941	61.255	71.8034	52.8239	90.3066	71.604	101.177	53.6661	28.7894
chr12_42580540_42580544_+	6	3	21	19	12	1	1	0	45	16	44	20	58	20	59	20	54	30	51	27	42	16	0	0	30	9	91.3242	14.0937	90.0488	39.3274	290.072	44.6449	124.347	0	130.893	83.8711	185.877	115.992	146.625	73.5559	128.732	81.6733	110.782	83.4061	100.123	80.5545	118.04	78.0598	0
chr16_19624150_19624244_-	8	15	57	21	10	1	0	3	74	40	52	29	94	59	62	33	109	62	105	65	96	51	2	3	57	21	121.766	70.4685	244.418	43.4671	241.727	44.6449	0	120.005	215.246	209.678	219.673	168.189	237.634	216.99	135.278	134.761	223.616	172.373	206.135	193.927	269.805	248.816	14.3947
chr4_149764082_149764084_-	8	1	4	4	1	0	0	0	5	3	7	12	6	11	1	12	2	16	8	15	10	13	3	0	19	12	121.766	4.6979	17.1521	8.27945	24.1727	0	0	0	14.5437	15.7258	29.5713	69.5955	15.1681	40.4558	2.1819	49.004	4.10305	44.4832	15.7055	44.7525	28.1047	63.4236	21.5921
chr4_56820440_56820538_+	4	5	20	9	1	0	0	0	14	12	14	12	23	31	13	19	25	27	32	32	23	15	1	0	21	8	60.8828	23.4895	85.7607	18.6288	24.1727	0	0	0	40.7223	62.9033	59.1426	69.5955	58.1444	114.012	28.3647	77.5897	51.2882	75.0655	62.822	95.4719	64.6407	73.1811	7.19735
chr1_207330690_207330696_+	1	0	5	1	0	0	0	2	4	1	5	1	6	6	6	2	8	2	9	2	7	2	0	0	11	1	15.2207	0	21.4402	2.06986	0	0	0	80.0032	11.6349	5.24194	21.1224	5.79962	15.1681	22.0668	13.0914	8.16733	16.4122	5.56041	17.6687	5.967	19.6733	9.75748	0
chr4_143726473_143726556_+	21	26	134	59	5	3	2	10	117	102	65	69	174	141	105	46	185	160	197	102	139	82	6	8	158	55	319.635	122.145	574.597	122.122	120.863	133.935	248.694	400.016	340.322	534.678	274.591	400.174	439.875	518.569	229.1	187.849	379.532	444.832	386.748	304.317	390.655	400.057	43.1841
chr10_10813295_10813312_+	8	14	22	4	18	5	4	11	53	22	59	17	60	31	102	27	86	33	93	30	74	28	1	0	52	22	121.766	65.7706	94.3368	8.27945	435.108	223.224	497.389	440.018	154.163	115.323	249.244	98.5936	151.681	114.012	222.554	110.259	176.431	91.7467	182.576	89.5049	207.974	136.605	7.19735
chr12_40096813_40096871_-	0	0	5	0	0	0	0	0	0	4	1	2	5	1	2	2	4	2	4	8	4	4	0	0	7	4	0	0	21.4402	0	0	0	0	0	0	20.9678	4.22447	11.5992	12.6401	3.6778	4.3638	8.16733	8.2061	5.56041	7.85275	23.868	11.2419	19.515	0
chr18_3673696_3673767_+	0	0	2	1	3	0	3	0	30	7	30	3	26	4	49	5	43	13	53	6	40	3	0	0	20	5	0	0	8.57607	2.06986	72.5181	0	373.042	0	87.2621	36.6936	126.734	17.3989	65.7284	14.7112	106.913	20.4183	88.2156	36.1426	104.049	17.901	112.419	14.6362	0
chr10_46063627_46063709_+	7	10	42	21	4	0	2	0	33	20	25	19	40	31	43	14	46	35	56	38	35	27	7	4	53	25	106.545	46.979	180.098	43.4671	96.6908	0	248.694	0	95.9883	104.839	105.612	110.193	101.121	114.012	93.8217	57.1713	94.3702	97.3071	109.938	113.373	98.3663	131.726	50.3815
chr1_84444038_84444137_+	2	2	15	6	10	2	0	4	79	10	59	6	77	13	96	23	103	35	134	21	97	16	0	0	24	2	30.4414	9.3958	64.3205	12.4192	241.727	89.2897	0	160.006	229.79	52.4194	249.244	34.7977	194.657	47.8113	209.462	93.9243	211.307	97.3071	263.067	62.6535	272.615	78.0598	0
chr10_64310949_64310961_-	5	9	51	24	2	0	1	1	73	25	32	16	66	33	62	20	55	31	78	46	62	27	7	3	66	22	76.1035	42.2811	218.69	49.6767	48.3454	0	124.347	40.0016	212.338	131.049	135.183	92.794	166.849	121.367	135.278	81.6733	112.834	86.1863	153.129	137.241	174.249	131.726	50.3815
chr3_105659544_105659623_-	8	3	11	7	0	2	0	3	15	17	5	9	23	19	19	22	22	29	26	31	14	24	2	0	17	5	121.766	14.0937	47.1684	14.489	0	89.2897	0	120.005	43.631	89.113	21.1224	52.1966	58.1444	69.8781	41.4561	89.8407	45.1336	80.6259	51.0428	92.4884	39.3465	117.09	14.3947
chr10_64621728_64621821_+	0	2	2	0	4	2	1	1	21	10	18	17	24	19	38	20	27	24	38	28	27	13	0	0	28	9	0	9.3958	8.57607	0	96.6908	89.2897	124.347	40.0016	61.0834	52.4194	76.0405	98.5936	60.6724	69.8781	82.9122	81.6733	55.3912	66.7249	74.6011	83.538	75.8826	63.4236	0
chr10_83062258_83062352_-	10	8	3	1	1	2	0	0	5	27	7	20	10	46	4	26	3	64	0	48	0	40	0	0	8	22	152.207	37.5832	12.8641	2.06986	24.1727	89.2897	0	0	14.5437	141.532	29.5713	115.992	25.2802	169.179	8.7276	106.175	6.15458	177.933	0	143.208	0	195.15	0
chr9_52575660_52575758_-	2	1	7	3	1	0	0	0	13	3	7	6	14	3	17	3	15	5	22	5	14	6	1	0	15	4	30.4414	4.6979	30.0163	6.20959	24.1727	0	0	0	37.8136	15.7258	29.5713	34.7977	35.3922	11.0334	37.0923	12.251	30.7729	13.901	43.1901	14.9175	39.3465	29.2724	7.19735
chrX_7098637_7098725_+	4	1	9	0	3	2	0	2	11	23	9	14	23	25	20	29	12	33	26	41	14	17	1	0	1	10	60.8828	4.6979	38.5923	0	72.5181	89.2897	0	80.0032	31.9961	120.565	38.0202	81.1947	58.1444	91.9449	43.638	118.426	24.6183	91.7467	51.0428	122.323	39.3465	82.9386	7.19735
chr10_37795676_37795747_+	0	0	26	14	10	1	0	2	77	8	63	7	74	11	108	11	115	10	95	11	74	9	0	0	44	1	0	0	111.489	28.9781	241.727	44.6449	0	80.0032	223.973	41.9355	266.142	40.5974	187.073	40.4558	235.645	44.9203	235.926	27.802	186.503	32.8185	207.974	43.9087	0
chr4_143866369_143866372_+	3	6	28	10	0	0	0	0	12	5	7	8	21	11	17	9	22	12	26	19	16	8	3	2	35	15	45.6621	28.1874	120.065	20.6986	0	0	0	0	34.9048	26.2097	29.5713	46.397	53.0884	40.4558	37.0923	36.753	45.1336	33.3624	51.0428	56.6865	44.9674	39.0299	21.5921
chr6_62282250_62282268_-	0	0	1	0	5	3	2	2	42	14	36	22	51	17	50	18	57	20	54	27	53	14	0	0	21	3	0	0	4.28804	0	120.863	133.935	248.694	80.0032	122.167	73.3872	152.081	127.592	128.929	62.5225	109.095	73.506	116.937	55.6041	106.012	80.5545	148.955	68.3023	0
chr7_95832279_95832314_+	5	1	27	8	4	0	1	3	28	7	10	4	27	9	17	5	31	12	38	9	31	5	4	0	15	2	76.1035	4.6979	115.777	16.5589	96.6908	0	124.347	120.005	81.4446	36.6936	42.2447	23.1985	68.2565	33.1002	37.0923	20.4183	63.5973	33.3624	74.6011	26.8515	87.1244	24.3937	28.7894
chr5_40007822_40007824_+	5	3	11	5	2	0	0	0	10	6	9	4	11	14	12	10	12	13	20	13	15	12	0	0	9	3	76.1035	14.0937	47.1684	10.3493	48.3454	0	0	0	29.0874	31.4517	38.0202	23.1985	27.8082	51.4891	26.1828	40.8367	24.6183	36.1426	39.2637	38.7855	42.157	58.5449	0
chr6_133013292_133013321_+	2	0	6	1	1	0	0	1	5	5	3	2	3	5	4	4	7	5	1	5	6	3	0	0	3	4	30.4414	0	25.7282	2.06986	24.1727	0	0	40.0016	14.5437	26.2097	12.6734	11.5992	7.58405	18.389	8.7276	16.3347	14.3607	13.901	1.96319	14.9175	16.8628	14.6362	0
chr4_152378910_152378986_+	0	1	18	6	0	1	0	1	24	3	8	3	26	6	10	4	26	6	22	8	19	6	1	0	14	3	0	4.6979	77.1846	12.4192	0	44.6449	0	40.0016	69.8097	15.7258	33.7958	17.3989	65.7284	22.0668	21.819	16.3347	53.3397	16.6812	43.1901	23.868	53.3988	29.2724	7.19735
chr4_56840176_56840223_+	3	0	12	4	0	0	0	0	10	6	8	10	15	9	13	7	14	13	25	14	7	10	4	1	20	5	45.6621	0	51.4564	8.27945	0	0	0	0	29.0874	31.4517	33.7958	57.9962	37.9203	33.1002	28.3647	28.5857	28.7214	36.1426	49.0797	41.769	19.6733	48.7874	28.7894
chr7_1672140_1672198_+	1	1	13	4	0	0	0	0	10	7	9	11	10	14	10	6	16	16	18	17	13	17	0	1	10	4	15.2207	4.6979	55.7445	8.27945	0	0	0	0	29.0874	36.6936	38.0202	63.7959	25.2802	51.4891	21.819	24.502	32.8244	44.4832	35.3374	50.7195	36.536	82.9386	0
chr1_206437448_206437450_-	2	1	8	2	3	0	0	1	8	3	11	4	15	3	11	5	17	7	19	8	12	4	0	0	6	3	30.4414	4.6979	34.3043	4.13972	72.5181	0	0	40.0016	23.2699	15.7258	46.4692	23.1985	37.9203	11.0334	24.0009	20.4183	34.8759	19.4614	37.3005	23.868	33.7256	19.515	0
chr9_105815469_105815558_-	3	1	4	1	1	1	0	1	4	13	0	13	1	18	0	5	3	20	2	17	3	11	0	0	4	6	45.6621	4.6979	17.1521	2.06986	24.1727	44.6449	0	40.0016	11.6349	68.1452	0	75.3951	2.52802	66.2003	0	20.4183	6.15458	55.6041	3.92637	50.7195	8.4314	53.6661	0
chr1_100026669_100026734_+	7	2	0	0	0	0	0	2	0	9	2	19	4	26	3	19	2	20	1	36	2	16	0	0	2	16	106.545	9.3958	0	0	0	0	0	80.0032	0	47.1775	8.44894	110.193	10.1121	95.6227	6.5457	77.5897	4.10305	55.6041	1.96319	107.406	5.62093	78.0598	0
chr3_149489930_149489979_+	10	17	41	15	2	4	1	8	34	33	9	24	60	37	44	29	44	52	68	48	48	24	2	0	35	16	152.207	79.8643	175.809	31.0479	48.3454	178.579	124.347	320.013	98.897	172.984	38.0202	139.191	151.681	136.078	96.0036	118.426	90.2671	144.571	133.497	143.208	134.902	117.09	14.3947
chr3_116822872_116822968_+	46	15	17	20	2	0	1	4	21	92	6	69	25	121	9	59	16	140	29	134	16	118	3	4	13	39	700.152	70.4685	72.8966	41.3972	48.3454	0	124.347	160.006	61.0834	482.259	25.3468	400.174	63.2004	445.013	19.6371	240.936	32.8244	389.228	56.9324	399.789	44.9674	575.691	21.5921
chr5_8709228_8709232_+	1	0	7	0	1	0	0	0	1	0	2	0	3	1	2	0	3	0	4	1	5	1	0	0	3	1	15.2207	0	30.0163	0	24.1727	0	0	0	2.90874	0	8.44894	0	7.58405	3.6778	4.3638	0	6.15458	0	7.85275	2.9835	14.0523	4.87874	0
chr3_149489265_149489361_+	23	32	79	53	16	8	4	30	136	96	69	105	161	175	137	123	171	214	180	153	111	116	4	0	111	48	350.076	150.333	338.755	109.703	386.763	357.159	497.389	1200.05	395.588	503.226	291.489	608.96	407.011	643.614	298.92	502.291	350.811	594.963	353.374	456.475	311.962	565.934	28.7894
chr10_90295485_90295504_-	1	0	13	5	2	0	1	3	15	5	12	4	23	7	11	2	18	1	15	4	16	2	2	0	16	2	15.2207	0	55.7445	10.3493	48.3454	0	124.347	120.005	43.631	26.2097	50.6937	23.1985	58.1444	25.7446	24.0009	8.16733	36.9275	2.7802	29.4478	11.934	44.9674	9.75748	14.3947
chr6_124477528_124477581_+	143	191	682	248	274	97	144	300	1048	415	748	321	1109	481	1168	484	1325	600	1196	474	1111	466	10	3	700	221	2176.56	897.299	2924.44	513.326	6623.32	4330.55	17906	12000.5	3048.35	2175.41	3159.9	1861.68	2803.57	1769.02	2548.46	1976.49	2718.27	1668.12	2347.97	1414.18	3122.43	2273.49	71.9735
chr14_86619681_86619759_+	0	0	3	0	3	1	0	0	13	0	8	3	7	0	39	8	27	6	33	3	16	2	0	0	12	3	0	0	12.8641	0	72.5181	44.6449	0	0	37.8136	0	33.7958	17.3989	17.6961	0	85.0941	32.6693	55.3912	16.6812	64.7851	8.95049	44.9674	9.75748	0
chr9_104543040_104543096_-	0	2	4	2	3	0	0	1	9	0	8	4	9	3	32	11	27	15	8	4	13	1	0	0	28	14	0	9.3958	17.1521	4.13972	72.5181	0	0	40.0016	26.1786	0	33.7958	23.1985	22.7522	11.0334	69.8208	44.9203	55.3912	41.703	15.7055	11.934	36.536	4.87874	0
chr9_109748035_109748045_+	4	4	28	10	3	0	1	2	39	9	22	10	39	19	44	9	49	16	48	13	38	15	0	1	19	3	60.8828	18.7916	120.065	20.6986	72.5181	0	124.347	80.0032	113.441	47.1775	92.9384	57.9962	98.5927	69.8781	96.0036	36.753	100.525	44.4832	94.2329	38.7855	106.798	73.1811	0
chr10_72806667_72806738_+	84	77	272	194	131	44	28	90	425	271	414	278	583	338	465	257	488	355	573	399	451	287	10	0	210	67	1278.54	361.738	1166.35	401.553	3166.62	1964.37	3481.72	3600.14	1236.21	1420.57	1748.93	1612.3	1473.83	1243.09	1014.58	1049.5	1001.14	986.972	1124.91	1190.42	1267.52	1400.2	71.9735
chr17_88981598_88981599_+	6	5	21	16	8	0	0	1	38	17	24	15	28	18	39	21	44	26	46	27	39	16	1	1	21	12	91.3242	23.4895	90.0488	33.1178	193.382	0	0	40.0016	110.532	89.113	101.387	86.9943	70.7845	66.2003	85.0941	85.757	90.2671	72.2853	90.3066	80.5545	109.608	78.0598	7.19735
chr18_64172097_64172195_-	1	1	8	1	0	0	0	0	3	0	7	2	13	5	6	7	8	7	13	4	14	4	0	0	6	2	15.2207	4.6979	34.3043	2.06986	0	0	0	0	8.72621	0	29.5713	11.5992	32.8642	18.389	13.0914	28.5857	16.4122	19.4614	25.5214	11.934	39.3465	19.515	0
chr18_32048245_32048313_+	14	20	78	29	9	3	0	2	115	72	56	76	131	108	89	56	110	108	138	113	82	86	10	6	92	38	213.09	93.958	334.467	60.026	217.554	133.935	0	80.0032	334.505	377.42	236.57	440.771	331.17	397.202	194.189	228.685	225.668	300.262	270.92	337.135	230.458	419.572	71.9735
chr4_143730609_143730653_+	21	16	75	35	2	0	1	7	55	56	30	34	82	74	59	36	57	71	109	75	68	50	7	14	85	50	319.635	75.1664	321.603	72.4452	48.3454	0	124.347	280.011	159.98	293.549	126.734	197.187	207.297	272.157	128.732	147.012	116.937	197.394	213.987	223.762	191.112	243.937	50.3815
chr13_83017295_83017302_+	0	0	2	0	0	0	0	1	16	6	12	2	12	1	24	10	24	9	36	15	23	8	0	0	10	6	0	0	8.57607	0	0	0	0	40.0016	46.5398	31.4517	50.6937	11.5992	30.3362	3.6778	52.3656	40.8367	49.2366	25.0218	70.6747	44.7525	64.6407	39.0299	0
chr1_199333589_199333631_+	2	3	21	7	0	0	0	2	6	8	9	4	22	15	12	10	24	18	26	17	17	4	1	2	21	9	30.4414	14.0937	90.0488	14.489	0	0	0	80.0032	17.4524	41.9355	38.0202	23.1985	55.6164	55.1669	26.1828	40.8367	49.2366	50.0436	51.0428	50.7195	47.7779	19.515	7.19735
chr3_147173792_147173851_+	9	5	23	20	2	0	1	4	35	9	22	13	43	24	33	23	49	26	37	37	50	21	3	0	31	9	136.986	23.4895	98.6248	41.3972	48.3454	0	124.347	160.006	101.806	47.1775	92.9384	75.3951	108.705	88.2671	72.0027	93.9243	100.525	72.2853	72.6379	110.389	140.523	102.454	21.5921
chr4_93472234_93472329_+	38	25	11	12	0	1	0	11	15	123	17	115	25	234	14	106	19	229	21	208	17	152	3	8	16	90	578.387	117.448	47.1684	24.8383	0	44.6449	0	440.018	43.631	644.759	71.816	666.957	63.2004	860.604	30.5466	432.869	38.979	636.666	41.2269	620.568	47.7779	741.568	21.5921
chr3_147165889_147165937_+	4	5	22	14	3	0	0	1	19	16	18	7	21	7	21	10	28	18	25	16	23	6	2	0	26	9	60.8828	23.4895	94.3368	28.9781	72.5181	0	0	40.0016	55.266	83.8711	76.0405	40.5974	53.0884	25.7446	45.8199	40.8367	57.4427	50.0436	49.0797	47.736	64.6407	29.2724	14.3947
chr3_170454867_170454961_-	10	15	59	32	11	3	3	2	125	20	114	20	134	29	178	40	156	39	167	32	136	25	4	0	59	13	152.207	70.4685	252.994	66.2356	265.9	133.935	373.042	80.0032	363.592	104.839	481.59	115.992	338.754	106.656	388.378	163.347	320.038	108.428	327.852	95.4719	382.223	121.968	28.7894
chr5_148237789_148237793_+	7	6	33	21	4	0	0	2	20	5	12	4	33	9	16	11	20	10	22	18	20	7	2	0	21	9	106.545	28.1874	141.505	43.4671	96.6908	0	0	80.0032	58.1747	26.2097	50.6937	23.1985	83.4246	33.1002	34.9104	44.9203	41.0305	27.802	43.1901	53.703	56.2093	34.1512	14.3947
chr1_199346520_199346612_+	5	4	12	7	1	0	1	0	14	4	8	8	33	7	26	9	32	14	26	13	19	11	0	0	20	5	76.1035	18.7916	51.4564	14.489	24.1727	0	124.347	0	40.7223	20.9678	33.7958	46.397	83.4246	25.7446	56.7294	36.753	65.6488	38.9228	51.0428	38.7855	53.3988	53.6661	0
chr20_27397665_27397667_+	2	0	7	1	1	0	0	0	3	5	1	4	1	6	7	14	4	9	6	10	5	15	0	0	2	4	30.4414	0	30.0163	2.06986	24.1727	0	0	0	8.72621	26.2097	4.22447	23.1985	2.52802	22.0668	15.2733	57.1713	8.2061	25.0218	11.7791	29.835	14.0523	73.1811	0
chr11_58175826_58175892_+	4	5	22	6	3	0	0	2	54	19	37	8	45	24	58	19	65	29	91	32	59	15	0	0	21	3	60.8828	23.4895	94.3368	12.4192	72.5181	0	0	80.0032	157.072	99.5969	156.305	46.397	113.761	88.2671	126.55	77.5897	133.349	80.6259	178.65	95.4719	165.817	73.1811	0
chr10_46072361_46072366_+	2	2	19	12	0	1	0	1	15	2	10	2	19	8	6	3	22	5	41	8	21	5	0	0	27	6	30.4414	9.3958	81.4727	24.8383	0	44.6449	0	40.0016	43.631	10.4839	42.2447	11.5992	48.0323	29.4224	13.0914	12.251	45.1336	13.901	80.4906	23.868	59.0198	24.3937	0
chr10_56678438_56678440_-	4	3	8	4	4	4	0	5	7	11	13	12	16	16	20	24	13	21	16	19	14	11	0	0	8	6	60.8828	14.0937	34.3043	8.27945	96.6908	178.579	0	200.008	20.3611	57.6614	54.9181	69.5955	40.4483	58.8447	43.638	98.008	26.6698	58.3843	31.411	56.6865	39.3465	53.6661	0
chrX_4067313_4067338_-	3	2	7	5	0	0	1	2	2	3	0	5	4	2	3	6	3	4	4	21	2	7	0	0	10	13	45.6621	9.3958	30.0163	10.3493	0	0	124.347	80.0032	5.81747	15.7258	0	28.9981	10.1121	7.35559	6.5457	24.502	6.15458	11.1208	7.85275	62.6535	5.62093	34.1512	0
chr3_60298116_60298169_-	1	0	10	0	2	0	2	0	20	1	18	4	29	1	36	7	28	5	35	3	24	4	2	0	11	1	15.2207	0	42.8804	0	48.3454	0	248.694	0	58.1747	5.24194	76.0405	23.1985	73.3125	3.6778	78.5484	28.5857	57.4427	13.901	68.7115	8.95049	67.4512	19.515	14.3947
chr3_155521256_155521349_+	10	4	8	7	0	0	0	2	6	10	6	8	4	17	9	12	9	13	10	15	10	11	1	0	9	9	152.207	18.7916	34.3043	14.489	0	0	0	80.0032	17.4524	52.4194	25.3468	46.397	10.1121	62.5225	19.6371	49.004	18.4637	36.1426	19.6319	44.7525	28.1047	53.6661	7.19735
chr3_59913621_59913682_-	1	3	18	6	1	0	0	0	23	6	16	3	22	7	18	4	36	10	31	10	20	2	1	0	18	5	15.2207	14.0937	77.1846	12.4192	24.1727	0	0	0	66.9009	31.4517	67.5915	17.3989	55.6164	25.7446	39.2742	16.3347	73.8549	27.802	60.8588	29.835	56.2093	9.75748	7.19735
chr19_24775877_24775890_-	1	0	14	7	1	0	1	1	21	5	24	2	31	2	43	5	39	11	32	5	23	6	0	0	14	2	15.2207	0	60.0325	14.489	24.1727	0	124.347	40.0016	61.0834	26.2097	101.387	11.5992	78.3685	7.35559	93.8217	20.4183	80.0095	30.5822	62.822	14.9175	64.6407	29.2724	0
chr1_185363668_185363671_+	6	1	4	3	1	2	1	3	7	6	2	9	5	21	5	12	8	13	7	18	5	9	0	0	5	6	91.3242	4.6979	17.1521	6.20959	24.1727	89.2897	124.347	120.005	20.3611	31.4517	8.44894	52.1966	12.6401	77.2337	10.9095	49.004	16.4122	36.1426	13.7423	53.703	14.0523	43.9087	0
chr12_11530383_11530433_-	0	0	7	0	0	0	0	0	1	0	3	1	3	2	5	2	3	1	4	7	5	1	0	0	7	1	0	0	30.0163	0	0	0	0	0	2.90874	0	12.6734	5.79962	7.58405	7.35559	10.9095	8.16733	6.15458	2.7802	7.85275	20.8845	14.0523	4.87874	0
chr4_143966027_143966097_+	132	126	231	89	17	13	5	41	234	404	154	395	269	512	163	314	217	551	314	600	258	392	18	51	252	306	2009.13	591.936	990.536	184.218	410.936	580.383	621.736	1640.07	680.644	2117.74	650.569	2290.85	680.037	1883.03	355.65	1282.27	445.181	1531.89	616.441	1790.1	725.1	1912.47	129.552
chr14_50651616_50651657_+	4	0	13	2	0	1	0	0	10	3	6	1	7	4	6	4	7	7	11	7	8	4	4	0	14	2	60.8828	0	55.7445	4.13972	0	44.6449	0	0	29.0874	15.7258	25.3468	5.79962	17.6961	14.7112	13.0914	16.3347	14.3607	19.4614	21.595	20.8845	22.4837	19.515	28.7894
chr1_78592852_78592924_+	2	1	7	2	1	0	0	3	10	3	8	6	7	3	13	5	20	1	13	3	4	5	0	0	6	3	30.4414	4.6979	30.0163	4.13972	24.1727	0	0	120.005	29.0874	15.7258	33.7958	34.7977	17.6961	11.0334	28.3647	20.4183	41.0305	2.7802	25.5214	8.95049	11.2419	24.3937	0
chr11_36857371_36857395_+	33	14	104	76	6	0	0	3	85	51	114	61	149	78	87	42	101	83	108	64	75	42	19	10	107	56	502.283	65.7706	445.956	157.31	145.036	0	0	120.005	247.243	267.339	481.59	353.777	376.674	286.868	189.825	171.514	207.204	230.757	212.024	190.944	210.785	204.907	136.75
chr4_152363304_152363318_+	3	3	15	6	1	0	0	0	9	2	33	12	11	7	10	10	9	7	17	10	18	11	3	0	17	6	45.6621	14.0937	64.3205	12.4192	24.1727	0	0	0	26.1786	10.4839	139.408	69.5955	27.8082	25.7446	21.819	40.8367	18.4637	19.4614	33.3742	29.835	50.5884	53.6661	21.5921
chr10_87123761_87123789_+	0	0	7	0	1	0	0	0	8	1	4	2	11	3	8	4	5	4	9	2	8	3	0	0	7	1	0	0	30.0163	0	24.1727	0	0	0	23.2699	5.24194	16.8979	11.5992	27.8082	11.0334	17.4552	16.3347	10.2576	11.1208	17.6687	5.967	22.4837	14.6362	0
chr6_128954686_128954775_-	2	4	12	6	4	2	0	3	25	14	18	7	28	23	42	16	34	28	52	38	31	13	0	0	23	10	30.4414	18.7916	51.4564	12.4192	96.6908	89.2897	0	120.005	72.7184	73.3872	76.0405	40.5974	70.7845	84.5893	91.6398	65.3387	69.7519	77.8457	102.086	113.373	87.1244	63.4236	0
chr3_105654089_105654142_-	10	8	14	10	3	4	0	9	16	22	12	19	33	25	12	19	32	29	14	20	9	18	2	0	21	10	152.207	37.5832	60.0325	20.6986	72.5181	178.579	0	360.014	46.5398	115.323	50.6937	110.193	83.4246	91.9449	26.1828	77.5897	65.6488	80.6259	27.4846	59.67	25.2942	87.8173	14.3947
chr2_258014418_258014420_+	3	1	5	2	2	1	1	3	8	7	12	9	11	9	11	9	11	16	14	8	4	8	0	0	5	6	45.6621	4.6979	21.4402	4.13972	48.3454	44.6449	124.347	120.005	23.2699	36.6936	50.6937	52.1966	27.8082	33.1002	24.0009	36.753	22.5668	44.4832	27.4846	23.868	11.2419	39.0299	0
chr4_143998905_143998906_+	5	4	5	2	2	1	0	4	5	13	3	12	8	14	3	11	7	18	8	23	6	13	0	1	8	11	76.1035	18.7916	21.4402	4.13972	48.3454	44.6449	0	160.006	14.5437	68.1452	12.6734	69.5955	20.2241	51.4891	6.5457	44.9203	14.3607	50.0436	15.7055	68.6205	16.8628	63.4236	0
chr10_65874741_65874812_+	12	13	50	31	7	3	2	3	63	45	43	44	76	74	73	51	89	76	89	82	66	49	8	3	43	22	182.648	61.0727	214.402	64.1657	169.209	133.935	248.694	120.005	183.25	235.887	181.652	255.183	192.129	272.157	159.279	208.267	182.586	211.295	174.724	244.647	185.491	239.058	57.5788
chr18_77105703_77105770_+	1	4	17	8	21	1	4	3	101	17	102	26	117	26	156	31	136	44	180	45	145	43	0	0	48	11	15.2207	18.7916	72.8966	16.5589	507.626	44.6449	497.389	120.005	293.782	89.113	430.896	150.79	295.778	95.6227	340.377	126.594	279.008	122.329	353.374	134.257	407.517	209.786	0
chr3_123861008_123861039_+	1	0	7	2	1	0	0	0	7	3	11	1	16	5	8	1	12	4	21	5	15	4	0	0	15	0	15.2207	0	30.0163	4.13972	24.1727	0	0	0	20.3611	15.7258	46.4692	5.79962	40.4483	18.389	17.4552	4.08367	24.6183	11.1208	41.2269	14.9175	42.157	19.515	0
chr5_23557755_23557769_-	1	2	0	0	8	27	0	2	3	15	55	26	13	23	50	103	32	59	40	74	24	61	0	0	30	16	15.2207	9.3958	0	0	193.382	1205.41	0	80.0032	8.72621	78.6291	232.346	150.79	32.8642	84.5893	109.095	420.618	65.6488	164.032	78.5275	220.779	67.4512	297.603	0
chr2_245076710_245076744_+	0	0	1	0	6	0	1	3	57	11	66	9	71	16	84	13	88	20	87	9	72	11	0	0	25	2	0	0	4.28804	0	145.036	0	124.347	120.005	165.798	57.6614	278.815	52.1966	179.489	58.8447	183.28	53.0877	180.534	55.6041	170.797	26.8515	202.353	53.6661	0
chr9_45071422_45071457_+	0	0	0	0	15	3	2	4	54	15	48	16	60	13	52	19	60	14	68	21	64	16	0	0	26	5	0	0	0	0	362.59	133.935	248.694	160.006	157.072	78.6291	202.775	92.794	151.681	47.8113	113.459	77.5897	123.092	38.9228	133.497	62.6535	179.87	78.0598	0
chr13_48517191_48517226_-	2	1	12	5	2	0	0	0	22	2	19	0	23	3	38	7	23	0	24	9	25	8	0	0	11	1	30.4414	4.6979	51.4564	10.3493	48.3454	0	0	0	63.9922	10.4839	80.265	0	58.1444	11.0334	82.9122	28.5857	47.1851	0	47.1165	26.8515	70.2616	39.0299	0
chr10_15098613_15098650_+	2	2	8	1	1	0	0	1	4	2	10	4	12	1	19	10	12	9	26	5	8	5	0	0	9	2	30.4414	9.3958	34.3043	2.06986	24.1727	0	0	40.0016	11.6349	10.4839	42.2447	23.1985	30.3362	3.6778	41.4561	40.8367	24.6183	25.0218	51.0428	14.9175	22.4837	24.3937	0
chr1_32828947_32829036_-	1	0	5	0	0	0	0	0	1	2	5	2	7	7	6	1	4	4	5	10	5	3	0	0	5	1	15.2207	0	21.4402	0	0	0	0	0	2.90874	10.4839	21.1224	11.5992	17.6961	25.7446	13.0914	4.08367	8.2061	11.1208	9.81593	29.835	14.0523	14.6362	0
chr10_13089609_13089642_-	3	5	36	21	14	2	2	7	52	16	50	16	64	18	77	19	81	34	91	23	78	7	0	0	50	7	45.6621	23.4895	154.369	43.4671	338.418	89.2897	248.694	280.011	151.254	83.8711	211.224	92.794	161.793	66.2003	168.006	77.5897	166.174	94.5269	178.65	68.6205	219.216	34.1512	0
chr11_68362744_68362830_+	0	0	6	0	1	0	0	0	1	1	2	1	5	0	5	3	8	2	4	1	3	1	0	0	6	2	0	0	25.7282	0	24.1727	0	0	0	2.90874	5.24194	8.44894	5.79962	12.6401	0	10.9095	12.251	16.4122	5.56041	7.85275	2.9835	8.4314	4.87874	0
chr18_29317009_29317014_-	1	0	4	0	2	0	0	1	1	1	4	1	6	0	6	4	6	1	14	8	7	1	0	0	5	2	15.2207	0	17.1521	0	48.3454	0	0	40.0016	2.90874	5.24194	16.8979	5.79962	15.1681	0	13.0914	16.3347	12.3092	2.7802	27.4846	23.868	19.6733	4.87874	0
chr5_1025238_1025289_-	0	0	4	2	2	1	0	1	44	5	32	2	43	8	72	9	71	15	63	9	59	9	0	0	21	3	0	0	17.1521	4.13972	48.3454	44.6449	0	40.0016	127.984	26.2097	135.183	11.5992	108.705	29.4224	157.097	36.753	145.658	41.703	123.681	26.8515	165.817	43.9087	0
chr12_2522949_2523034_+	2	0	9	3	0	0	0	0	9	5	12	7	27	6	22	6	23	13	34	13	23	5	1	0	12	1	30.4414	0	38.5923	6.20959	0	0	0	0	26.1786	26.2097	50.6937	40.5974	68.2565	22.0668	48.0018	24.502	47.1851	36.1426	66.7483	38.7855	64.6407	24.3937	7.19735
chr1_207354575_207354576_+	2	0	7	2	1	0	0	0	9	10	4	5	14	13	7	11	6	18	13	14	16	11	0	0	3	6	30.4414	0	30.0163	4.13972	24.1727	0	0	0	26.1786	52.4194	16.8979	28.9981	35.3922	47.8113	15.2733	44.9203	12.3092	50.0436	25.5214	41.769	44.9674	53.6661	0
chr9_74474297_74474370_-	7	5	13	11	2	0	0	1	29	15	18	25	28	33	39	25	35	54	38	46	23	29	0	0	22	9	106.545	23.4895	55.7445	22.7685	48.3454	0	0	40.0016	84.3533	78.6291	76.0405	144.991	70.7845	121.367	85.0941	102.092	71.8034	150.131	74.6011	137.241	64.6407	141.483	0
chr1_148524327_148524331_+	1	0	28	13	7	2	0	1	23	6	10	1	29	6	25	3	30	10	47	8	27	5	1	0	24	0	15.2207	0	120.065	26.9082	169.209	89.2897	0	40.0016	66.9009	31.4517	42.2447	5.79962	73.3125	22.0668	54.5475	12.251	61.5458	27.802	92.2698	23.868	75.8826	24.3937	7.19735
chr11_63928044_63928048_+	1	0	8	4	0	0	0	1	7	1	3	0	3	0	2	0	6	1	5	1	9	1	0	0	12	5	15.2207	0	34.3043	8.27945	0	0	0	40.0016	20.3611	5.24194	12.6734	0	7.58405	0	4.3638	0	12.3092	2.7802	9.81593	2.9835	25.2942	4.87874	0
chr1_94825849_94825888_+	5	5	7	4	1	1	0	4	8	6	4	9	8	8	9	8	9	13	9	10	6	12	0	0	20	10	76.1035	23.4895	30.0163	8.27945	24.1727	44.6449	0	160.006	23.2699	31.4517	16.8979	52.1966	20.2241	29.4224	19.6371	32.6693	18.4637	36.1426	17.6687	29.835	16.8628	58.5449	0
chr10_61873946_61874029_-	8	6	27	22	9	2	1	2	87	28	60	21	75	31	114	40	120	42	145	88	97	37	0	0	30	7	121.766	28.1874	115.777	45.537	217.554	89.2897	124.347	80.0032	253.06	146.774	253.468	121.792	189.601	114.012	248.737	163.347	246.183	116.769	284.662	262.548	272.615	180.513	0
chr12_36488267_36488335_-	0	0	12	5	4	2	0	0	32	11	28	2	38	5	53	8	44	11	49	9	37	4	0	0	13	2	0	0	51.4564	10.3493	96.6908	89.2897	0	0	93.0795	57.6614	118.285	11.5992	96.0646	18.389	115.641	32.6693	90.2671	30.5822	96.1961	26.8515	103.987	19.515	0
chr13_80234516_80234518_-	14	13	13	7	7	2	0	3	30	34	21	36	21	50	22	39	31	43	31	43	23	32	0	0	17	10	213.09	61.0727	55.7445	14.489	169.209	89.2897	0	120.005	87.2621	178.226	88.7139	208.786	53.0884	183.89	48.0018	159.263	63.5973	119.549	60.8588	128.29	64.6407	156.12	0
chr1_212788139_212788147_-	4	0	2	0	0	0	0	1	1	2	1	2	1	7	1	3	2	10	2	9	3	6	0	0	3	2	60.8828	0	8.57607	0	0	0	0	40.0016	2.90874	10.4839	4.22447	11.5992	2.52802	25.7446	2.1819	12.251	4.10305	27.802	3.92637	26.8515	8.4314	29.2724	0
chr16_19193902_19193904_-	5	10	30	1	19	5	8	8	79	31	59	26	77	31	96	43	78	35	85	36	73	35	1	0	39	11	76.1035	46.979	128.641	2.06986	459.281	223.224	994.777	320.013	229.79	162.5	249.244	150.79	194.657	114.012	209.462	175.598	160.019	97.3071	166.871	107.406	205.164	170.756	7.19735
chr3_3760268_3760347_-	3	1	5	1	0	0	0	1	6	2	5	1	2	4	4	5	7	3	3	0	7	1	0	0	4	3	45.6621	4.6979	21.4402	2.06986	0	0	0	40.0016	17.4524	10.4839	21.1224	5.79962	5.05603	14.7112	8.7276	20.4183	14.3607	8.34061	5.88956	0	19.6733	4.87874	0
chr16_19619482_19619484_-	6	7	12	5	0	0	0	1	8	10	16	9	11	12	11	10	12	12	13	16	17	11	0	0	20	8	91.3242	32.8853	51.4564	10.3493	0	0	0	40.0016	23.2699	52.4194	67.5915	52.1966	27.8082	44.1335	24.0009	40.8367	24.6183	33.3624	25.5214	47.736	47.7779	53.6661	0
chr10_64311079_64311176_-	35	55	174	82	9	4	2	6	406	251	155	139	387	272	316	159	308	236	384	257	312	212	11	6	234	85	532.725	258.385	746.118	169.729	217.554	178.579	248.694	240.01	1180.95	1315.73	654.793	806.148	978.342	1000.36	689.481	649.303	631.87	656.128	753.864	766.759	876.865	1034.29	79.1709
chr5_169536219_169536221_+	3	0	1	0	0	4	0	2	0	2	0	2	1	3	2	6	1	5	1	2	0	3	0	0	3	6	45.6621	0	4.28804	0	0	178.579	0	80.0032	0	10.4839	0	11.5992	2.52802	11.0334	4.3638	24.502	2.05153	13.901	1.96319	5.967	0	14.6362	0
chr13_46179637_46179647_+	2	0	8	2	0	0	1	0	4	5	8	1	10	1	8	3	4	2	15	3	7	3	0	0	5	1	30.4414	0	34.3043	4.13972	0	0	124.347	0	11.6349	26.2097	33.7958	5.79962	25.2802	3.6778	17.4552	12.251	8.2061	5.56041	29.4478	8.95049	19.6733	14.6362	0
chr4_125336417_125336466_+	3	1	11	4	0	0	0	0	9	2	7	2	11	3	7	2	19	5	14	8	11	6	1	1	9	3	45.6621	4.6979	47.1684	8.27945	0	0	0	0	26.1786	10.4839	29.5713	11.5992	27.8082	11.0334	15.2733	8.16733	38.979	13.901	27.4846	23.868	30.9151	29.2724	7.19735
chr15_47638923_47638924_+	1	1	13	3	1	0	0	0	9	2	3	4	11	3	4	4	13	5	13	6	10	3	0	0	5	1	15.2207	4.6979	55.7445	6.20959	24.1727	0	0	0	26.1786	10.4839	12.6734	23.1985	27.8082	11.0334	8.7276	16.3347	26.6698	13.901	25.5214	17.901	28.1047	14.6362	0
chr7_80632654_80632660_-	0	0	3	0	0	1	0	0	10	2	12	1	10	4	24	2	17	4	17	5	19	3	0	0	15	1	0	0	12.8641	0	0	44.6449	0	0	29.0874	10.4839	50.6937	5.79962	25.2802	14.7112	52.3656	8.16733	34.8759	11.1208	33.3742	14.9175	53.3988	14.6362	0
chr15_51000586_51000640_-	1	4	18	8	2	1	3	2	20	13	26	18	30	13	33	22	42	27	55	33	23	14	0	0	23	16	15.2207	18.7916	77.1846	16.5589	48.3454	44.6449	373.042	80.0032	58.1747	68.1452	109.836	104.393	75.8405	47.8113	72.0027	89.8407	86.1641	75.0655	107.975	98.4554	64.6407	68.3023	0
chr12_35267090_35267092_+	5	1	9	4	3	1	0	1	4	10	2	7	9	20	1	11	6	11	9	14	3	15	2	0	6	6	76.1035	4.6979	38.5923	8.27945	72.5181	44.6449	0	40.0016	11.6349	52.4194	8.44894	40.5974	22.7522	73.5559	2.1819	44.9203	12.3092	30.5822	17.6687	41.769	8.4314	73.1811	14.3947
chr10_13979412_13979493_-	14	22	157	97	37	6	8	13	299	48	254	45	314	66	368	86	375	85	442	91	364	82	3	1	143	33	213.09	103.354	673.222	200.777	894.39	267.869	994.777	520.021	869.712	251.613	1073.02	260.983	793.797	242.735	802.939	351.195	769.322	236.317	867.728	271.498	1023.01	400.057	21.5921
chr14_7996913_7996945_+	4	2	6	4	0	3	0	1	8	10	2	3	13	9	11	4	17	12	15	3	6	4	1	0	12	7	60.8828	9.3958	25.7282	8.27945	0	133.935	0	40.0016	23.2699	52.4194	8.44894	17.3989	32.8642	33.1002	24.0009	16.3347	34.8759	33.3624	29.4478	8.95049	16.8628	19.515	7.19735
chr10_109776328_109776335_-	7	9	37	29	10	2	1	1	70	15	63	12	56	19	109	22	102	24	90	16	86	22	0	0	67	12	106.545	42.2811	158.657	60.026	241.727	89.2897	124.347	40.0016	203.611	78.6291	266.142	69.5955	141.569	69.8781	237.827	89.8407	209.256	66.7249	176.687	47.736	241.7	107.332	0
chr6_128882289_128882345_-	1	0	5	1	0	0	0	1	0	2	1	2	3	3	5	2	5	2	8	1	0	2	0	0	6	3	15.2207	0	21.4402	2.06986	0	0	0	40.0016	0	10.4839	4.22447	11.5992	7.58405	11.0334	10.9095	8.16733	10.2576	5.56041	15.7055	2.9835	0	9.75748	0
chr5_23485450_23485496_-	4	1	1	0	0	0	0	1	2	8	3	15	2	17	0	9	3	20	4	21	0	19	0	1	3	13	60.8828	4.6979	4.28804	0	0	0	0	40.0016	5.81747	41.9355	12.6734	86.9943	5.05603	62.5225	0	36.753	6.15458	55.6041	7.85275	62.6535	0	92.696	0
chr4_184153025_184153097_+	0	2	4	2	14	5	0	2	49	5	40	5	56	10	78	19	74	17	61	10	62	16	0	0	21	12	0	9.3958	17.1521	4.13972	338.418	223.224	0	80.0032	142.528	26.2097	168.979	28.9981	141.569	36.778	170.188	77.5897	151.813	47.2634	119.754	29.835	174.249	78.0598	0
chr17_59797502_59797577_+	11	17	140	85	14	4	1	10	216	36	139	47	218	52	254	56	262	62	328	88	258	64	4	0	81	18	167.428	79.8643	600.325	175.938	338.418	178.579	124.347	400.016	628.287	188.71	587.202	272.582	551.108	191.245	554.203	228.685	537.5	172.373	643.925	262.548	725.1	312.239	28.7894
chr8_112772208_112772271_+	1	0	4	0	0	0	0	0	0	7	0	4	0	8	0	6	1	11	0	16	0	9	0	0	1	10	15.2207	0	17.1521	0	0	0	0	0	0	36.6936	0	23.1985	0	29.4224	0	24.502	2.05153	30.5822	0	47.736	0	43.9087	0
chr3_108102607_108102608_+	8	4	18	17	1	0	0	0	19	12	10	9	27	12	15	16	29	21	29	22	26	18	0	0	17	7	121.766	18.7916	77.1846	35.1877	24.1727	0	0	0	55.266	62.9033	42.2447	52.1966	68.2565	44.1335	32.7285	65.3387	59.4943	58.3843	56.9324	65.637	73.0721	87.8173	0
chr4_143962052_143962054_+	5	1	8	2	0	0	1	6	4	12	3	9	13	15	6	6	6	14	8	11	7	7	0	0	9	0	76.1035	4.6979	34.3043	4.13972	0	0	124.347	240.01	11.6349	62.9033	12.6734	52.1966	32.8642	55.1669	13.0914	24.502	12.3092	38.9228	15.7055	32.8185	19.6733	34.1512	0
chr19_9815895_9815973_-	1	1	18	9	1	1	1	0	38	13	14	4	39	7	29	8	47	11	46	15	34	10	1	0	34	1	15.2207	4.6979	77.1846	18.6288	24.1727	44.6449	124.347	0	110.532	68.1452	59.1426	23.1985	98.5927	25.7446	63.2751	32.6693	96.4217	30.5822	90.3066	44.7525	95.5558	48.7874	7.19735
chr1_193449949_193450043_-	8	9	4	0	0	3	0	0	0	31	1	33	4	41	6	31	4	66	8	85	5	43	0	0	7	22	121.766	42.2811	17.1521	0	0	133.935	0	0	0	162.5	4.22447	191.388	10.1121	150.79	13.0914	126.594	8.2061	183.493	15.7055	253.597	14.0523	209.786	0
chr1_199359151_199359210_+	2	1	11	5	1	1	0	6	11	9	10	5	19	10	16	5	20	16	21	9	12	8	3	0	17	5	30.4414	4.6979	47.1684	10.3493	24.1727	44.6449	0	240.01	31.9961	47.1775	42.2447	28.9981	48.0323	36.778	34.9104	20.4183	41.0305	44.4832	41.2269	26.8515	33.7256	39.0299	21.5921
chr6_71752447_71752546_-	11	8	31	25	1	0	0	0	33	5	20	10	54	17	15	15	33	32	46	20	27	12	6	1	42	11	167.428	37.5832	132.929	51.7465	24.1727	0	0	0	95.9883	26.2097	84.4894	57.9962	136.513	62.5225	32.7285	61.255	67.7004	88.9665	90.3066	59.67	75.8826	58.5449	43.1841
chr6_42782573_42782609_-	6	5	22	15	1	0	0	1	33	7	15	9	39	15	18	10	37	19	39	25	20	13	0	1	21	6	91.3242	23.4895	94.3368	31.0479	24.1727	0	0	40.0016	95.9883	36.6936	63.3671	52.1966	98.5927	55.1669	39.2742	40.8367	75.9065	52.8239	76.5643	74.5875	56.2093	63.4236	0
chr1_94791521_94791523_+	23	25	36	16	8	15	0	19	33	63	37	63	52	57	45	75	51	72	88	97	58	78	6	7	26	35	350.076	117.448	154.369	33.1178	193.382	669.673	0	760.03	95.9883	330.242	156.305	365.376	131.457	209.634	98.1855	306.275	104.628	200.175	172.76	289.399	163.007	380.542	43.1841
chr20_9896258_9896353_+	5	5	15	5	1	0	0	3	9	3	5	8	13	18	11	10	12	12	23	17	6	10	1	0	12	4	76.1035	23.4895	64.3205	10.3493	24.1727	0	0	120.005	26.1786	15.7258	21.1224	46.397	32.8642	66.2003	24.0009	40.8367	24.6183	33.3624	45.1533	50.7195	16.8628	48.7874	7.19735
chr8_32032126_32032130_+	2	1	5	0	0	0	0	0	0	0	1	2	3	0	0	1	3	3	3	0	0	0	0	1	4	9	30.4414	4.6979	21.4402	0	0	0	0	0	0	0	4.22447	11.5992	7.58405	0	0	4.08367	6.15458	8.34061	5.88956	0	0	0	0
chr15_49743293_49743297_+	1	1	8	0	1	0	1	2	16	2	12	0	15	1	17	2	19	1	23	4	12	3	0	0	4	2	15.2207	4.6979	34.3043	0	24.1727	0	124.347	80.0032	46.5398	10.4839	50.6937	0	37.9203	3.6778	37.0923	8.16733	38.979	2.7802	45.1533	11.934	33.7256	14.6362	0
chr1_163556312_163556355_-	11	10	63	63	14	2	1	7	111	16	114	26	138	21	170	30	178	30	192	49	138	41	1	0	72	10	167.428	46.979	270.146	130.401	338.418	89.2897	124.347	280.011	322.87	83.8711	481.59	150.79	348.866	77.2337	370.923	122.51	365.172	83.4061	376.932	146.191	387.844	200.028	7.19735
chr1_207345665_207345666_+	6	2	12	7	2	0	0	1	6	9	7	8	11	17	7	9	12	15	22	19	16	10	3	0	11	7	91.3242	9.3958	51.4564	14.489	48.3454	0	0	40.0016	17.4524	47.1775	29.5713	46.397	27.8082	62.5225	15.2733	36.753	24.6183	41.703	43.1901	56.6865	44.9674	48.7874	21.5921
chr19_41880178_41880252_+	14	16	83	69	21	4	5	7	235	37	148	29	255	54	331	49	329	77	346	67	247	42	7	1	97	26	213.09	75.1664	355.907	142.82	507.626	178.579	621.736	280.011	683.553	193.952	625.222	168.189	644.644	198.601	722.209	200.1	674.952	214.076	679.262	199.894	694.185	204.907	50.3815
chr16_19448425_19448460_+	4	5	3	0	7	1	2	4	19	39	27	35	39	53	36	50	35	63	41	58	20	57	0	0	17	14	60.8828	23.4895	12.8641	0	169.209	44.6449	248.694	160.006	55.266	204.436	114.061	202.987	98.5927	194.923	78.5484	204.183	71.8034	175.153	80.4906	173.043	56.2093	278.088	0
chr3_108158852_108158915_+	13	15	53	37	9	0	2	4	74	16	82	15	92	23	123	32	102	38	132	27	128	33	12	0	71	26	197.869	70.4685	227.266	76.5849	217.554	0	248.694	160.006	215.246	83.8711	346.407	86.9943	232.578	84.5893	268.374	130.677	209.256	105.648	259.141	80.5545	359.74	160.998	86.3682
chr4_164150777_164150861_-	3	1	14	7	2	1	0	1	19	5	15	7	27	4	23	5	24	9	39	10	14	5	3	2	24	7	45.6621	4.6979	60.0325	14.489	48.3454	44.6449	0	40.0016	55.266	26.2097	63.3671	40.5974	68.2565	14.7112	50.1837	20.4183	49.2366	25.0218	76.5643	29.835	39.3465	24.3937	21.5921
chr1_212913187_212913189_+	5	1	3	1	0	0	0	0	3	8	3	8	8	15	4	14	7	19	9	23	6	9	0	0	3	4	76.1035	4.6979	12.8641	2.06986	0	0	0	0	8.72621	41.9355	12.6734	46.397	20.2241	55.1669	8.7276	57.1713	14.3607	52.8239	17.6687	68.6205	16.8628	43.9087	0
chr3_18794633_18794634_+	2	0	3	0	5	0	0	1	18	4	10	4	23	3	21	7	32	5	20	7	22	7	0	0	4	2	30.4414	0	12.8641	0	120.863	0	0	40.0016	52.3572	20.9678	42.2447	23.1985	58.1444	11.0334	45.8199	28.5857	65.6488	13.901	39.2637	20.8845	61.8302	34.1512	0
chr1_267481240_267481326_-	1	2	15	8	3	0	0	1	37	2	28	3	47	7	66	7	68	9	89	13	62	7	0	0	20	5	15.2207	9.3958	64.3205	16.5589	72.5181	0	0	40.0016	107.623	10.4839	118.285	17.3989	118.817	25.7446	144.005	28.5857	139.504	25.0218	174.724	38.7855	174.249	34.1512	0
chr19_11473414_11473419_-	11	1	4	5	1	0	0	1	11	9	7	11	24	13	9	11	10	19	9	3	4	13	2	0	10	10	167.428	4.6979	17.1521	10.3493	24.1727	0	0	40.0016	31.9961	47.1775	29.5713	63.7959	60.6724	47.8113	19.6371	44.9203	20.5153	52.8239	17.6687	8.95049	11.2419	63.4236	14.3947
chr7_120629302_120629324_+	3	0	15	10	5	0	0	0	39	4	46	0	51	9	56	14	60	11	101	14	59	11	1	0	15	2	45.6621	0	64.3205	20.6986	120.863	0	0	0	113.441	20.9678	194.326	0	128.929	33.1002	122.186	57.1713	123.092	30.5822	198.282	41.769	165.817	53.6661	7.19735
chr14_82767387_82767389_+	0	1	7	1	2	1	1	0	16	4	14	1	14	4	20	2	17	2	21	4	16	2	0	0	9	3	0	4.6979	30.0163	2.06986	48.3454	44.6449	124.347	0	46.5398	20.9678	59.1426	5.79962	35.3922	14.7112	43.638	8.16733	34.8759	5.56041	41.2269	11.934	44.9674	9.75748	0
chr4_93657421_93657494_+	43	25	8	13	3	0	0	1	9	79	16	84	17	134	13	67	18	124	15	156	8	99	2	7	17	66	654.49	117.448	34.3043	26.9082	72.5181	0	0	40.0016	26.1786	414.113	67.5915	487.168	42.9763	492.825	28.3647	273.606	36.9275	344.745	29.4478	465.426	22.4837	482.995	14.3947
chr8_47027649_47027707_+	202	158	301	144	97	32	9	83	318	354	282	372	345	535	379	460	397	575	438	647	359	474	35	3	292	230	3074.58	742.268	1290.7	298.06	2344.75	1428.64	1119.12	3320.13	924.978	1855.65	1191.3	2157.46	872.166	1967.62	826.94	1878.49	814.456	1598.62	859.876	1930.32	1008.96	2312.52	251.907
chr10_52903357_52903389_-	6	2	2	0	1	0	0	0	0	3	2	4	4	8	3	8	1	8	0	10	1	2	0	0	2	6	91.3242	9.3958	8.57607	0	24.1727	0	0	0	0	15.7258	8.44894	23.1985	10.1121	29.4224	6.5457	32.6693	2.05153	22.2416	0	29.835	2.81047	9.75748	0
chr16_49353475_49353478_+	29	29	67	73	38	8	9	16	160	53	131	53	160	66	184	72	175	90	189	88	179	65	5	1	96	39	441.4	136.239	287.298	151.1	918.562	357.159	1119.12	640.026	465.398	277.823	553.406	307.38	404.483	242.735	401.47	294.024	359.017	250.218	371.042	262.548	503.073	317.118	35.9868
chr4_143869097_143869098_+	4	1	7	5	0	1	0	0	4	5	6	6	6	6	6	2	5	3	17	7	7	1	0	0	13	3	60.8828	4.6979	30.0163	10.3493	0	44.6449	0	0	11.6349	26.2097	25.3468	34.7977	15.1681	22.0668	13.0914	8.16733	10.2576	8.34061	33.3742	20.8845	19.6733	4.87874	0
chr1_204597895_204597907_+	2	1	2	0	0	0	0	1	3	9	3	7	6	13	4	9	4	12	5	18	5	9	0	0	4	9	30.4414	4.6979	8.57607	0	0	0	0	40.0016	8.72621	47.1775	12.6734	40.5974	15.1681	47.8113	8.7276	36.753	8.2061	33.3624	9.81593	53.703	14.0523	43.9087	0
chr3_76314813_76314827_-	2	1	2	0	1	0	0	0	2	2	3	1	6	4	3	3	4	4	2	7	0	2	0	0	10	4	30.4414	4.6979	8.57607	0	24.1727	0	0	0	5.81747	10.4839	12.6734	5.79962	15.1681	14.7112	6.5457	12.251	8.2061	11.1208	3.92637	20.8845	0	9.75748	0
chr4_166807309_166807396_+	10	6	17	9	11	2	0	0	39	26	16	15	43	24	32	19	37	35	43	20	30	23	3	0	20	5	152.207	28.1874	72.8966	18.6288	265.9	89.2897	0	0	113.441	136.29	67.5915	86.9943	108.705	88.2671	69.8208	77.5897	75.9065	97.3071	84.417	59.67	84.314	112.211	21.5921
chr10_89575548_89575550_-	8	4	14	12	0	0	1	0	8	10	5	7	11	16	9	8	9	11	14	21	10	12	2	0	18	8	121.766	18.7916	60.0325	24.8383	0	0	124.347	0	23.2699	52.4194	21.1224	40.5974	27.8082	58.8447	19.6371	32.6693	18.4637	30.5822	27.4846	62.6535	28.1047	58.5449	14.3947
chr10_55848274_55848280_+	4	5	4	4	22	0	0	3	12	4	42	8	10	7	78	16	42	12	45	19	20	4	0	0	104	19	60.8828	23.4895	17.1521	8.27945	531.799	0	0	120.005	34.9048	20.9678	177.428	46.397	25.2802	25.7446	170.188	65.3387	86.1641	33.3624	88.3434	56.6865	56.2093	19.515	0
chr1_204842112_204842118_+	3	0	3	3	0	1	0	1	2	3	0	4	2	3	1	6	3	8	4	10	3	2	0	0	13	6	45.6621	0	12.8641	6.20959	0	44.6449	0	40.0016	5.81747	15.7258	0	23.1985	5.05603	11.0334	2.1819	24.502	6.15458	22.2416	7.85275	29.835	8.4314	9.75748	0
chr1_207928625_207928636_+	13	11	14	5	5	2	1	13	28	24	22	20	30	32	35	36	32	40	48	29	39	30	4	0	16	14	197.869	51.6769	60.0325	10.3493	120.863	89.2897	124.347	520.021	81.4446	125.807	92.9384	115.992	75.8405	117.689	76.3665	147.012	65.6488	111.208	94.2329	86.5214	109.608	146.362	28.7894
chr15_29775517_29775599_+	2	0	6	2	0	0	0	0	10	4	2	2	10	3	10	2	17	1	11	2	9	8	0	0	6	2	30.4414	0	25.7282	4.13972	0	0	0	0	29.0874	20.9678	8.44894	11.5992	25.2802	11.0334	21.819	8.16733	34.8759	2.7802	21.595	5.967	25.2942	39.0299	0
chr2_51589847_51589939_-	1	0	6	3	0	0	1	2	13	3	24	3	20	12	22	11	28	16	28	9	17	4	0	0	10	4	15.2207	0	25.7282	6.20959	0	0	124.347	80.0032	37.8136	15.7258	101.387	17.3989	50.5603	44.1335	48.0018	44.9203	57.4427	44.4832	54.9692	26.8515	47.7779	19.515	0
chr9_36335401_36335494_+	7	7	11	7	1	1	0	4	29	25	12	12	23	26	27	23	23	35	29	28	13	33	1	0	15	11	106.545	32.8853	47.1684	14.489	24.1727	44.6449	0	160.006	84.3533	131.049	50.6937	69.5955	58.1444	95.6227	58.9113	93.9243	47.1851	97.3071	56.9324	83.538	36.536	160.998	7.19735
chr10_46079940_46080027_+	4	6	10	4	1	0	0	0	10	9	9	10	19	8	5	7	18	17	20	11	11	9	2	0	20	13	60.8828	28.1874	42.8804	8.27945	24.1727	0	0	0	29.0874	47.1775	38.0202	57.9962	48.0323	29.4224	10.9095	28.5857	36.9275	47.2634	39.2637	32.8185	30.9151	43.9087	14.3947
chr20_1557098_1557196_-	36	24	10	11	3	5	0	9	12	51	14	48	18	96	17	80	21	112	19	81	14	65	3	1	15	42	547.945	112.75	42.8804	22.7685	72.5181	223.224	0	360.014	34.9048	267.339	59.1426	278.382	45.5043	353.068	37.0923	326.693	43.082	311.383	37.3005	241.663	39.3465	317.118	21.5921
chr3_59911057_59911147_-	9	10	38	19	3	0	0	1	41	12	29	15	40	17	29	11	54	20	61	31	46	16	4	2	32	11	136.986	46.979	162.945	39.3274	72.5181	0	0	40.0016	119.258	62.9033	122.51	86.9943	101.121	62.5225	63.2751	44.9203	110.782	55.6041	119.754	92.4884	129.281	78.0598	28.7894
chr4_143864986_143865079_+	113	102	292	107	17	8	6	37	315	306	180	263	369	410	282	292	375	427	392	388	315	349	37	32	270	182	1719.94	479.186	1252.11	221.475	410.936	357.159	746.083	1480.06	916.252	1604.03	760.405	1525.3	932.838	1507.9	615.296	1192.43	769.322	1187.15	769.569	1157.6	885.296	1702.68	266.302
chr6_73152708_73152774_+	3	3	32	23	6	2	1	1	48	22	34	15	51	10	32	10	66	18	80	25	64	14	2	0	26	17	45.6621	14.0937	137.217	47.6068	145.036	89.2897	124.347	40.0016	139.619	115.323	143.632	86.9943	128.929	36.778	69.8208	40.8367	135.401	50.0436	157.055	74.5875	179.87	68.3023	14.3947
chr6_128873122_128873173_-	3	2	8	3	0	0	0	0	6	1	4	2	6	6	7	3	9	9	11	4	5	5	0	1	7	7	45.6621	9.3958	34.3043	6.20959	0	0	0	0	17.4524	5.24194	16.8979	11.5992	15.1681	22.0668	15.2733	12.251	18.4637	25.0218	21.595	11.934	14.0523	24.3937	0
chr3_155521694_155521764_+	10	7	6	2	2	0	1	0	7	11	3	10	6	16	4	15	7	17	10	22	7	9	0	1	7	7	152.207	32.8853	25.7282	4.13972	48.3454	0	124.347	0	20.3611	57.6614	12.6734	57.9962	15.1681	58.8447	8.7276	61.255	14.3607	47.2634	19.6319	65.637	19.6733	43.9087	0
chr20_27188110_27188117_+	1	2	8	1	1	1	0	0	2	2	5	0	4	3	8	7	18	5	7	1	10	0	0	0	11	3	15.2207	9.3958	34.3043	2.06986	24.1727	44.6449	0	0	5.81747	10.4839	21.1224	0	10.1121	11.0334	17.4552	28.5857	36.9275	13.901	13.7423	2.9835	28.1047	0	0
chr8_61264885_61264946_+	0	0	0	0	5	0	1	4	40	7	68	16	54	11	108	9	76	19	110	13	58	12	0	0	22	6	0	0	0	0	120.863	0	124.347	160.006	116.349	36.6936	287.264	92.794	136.513	40.4558	235.645	36.753	155.916	52.8239	215.95	38.7855	163.007	58.5449	0
chr10_105809247_105809257_-	7	8	27	17	1	2	0	0	41	16	26	22	42	22	53	23	65	28	87	54	52	29	2	0	25	9	106.545	37.5832	115.777	35.1877	24.1727	89.2897	0	0	119.258	83.8711	109.836	127.592	106.177	80.9115	115.641	93.9243	133.349	77.8457	170.797	161.109	146.144	141.483	14.3947
chr12_7264382_7264474_-	4	1	15	11	1	0	0	0	13	3	3	3	14	6	9	4	11	10	11	8	11	6	0	0	10	4	60.8828	4.6979	64.3205	22.7685	24.1727	0	0	0	37.8136	15.7258	12.6734	17.3989	35.3922	22.0668	19.6371	16.3347	22.5668	27.802	21.595	23.868	30.9151	29.2724	0
chr7_37714225_37714226_+	3	1	5	3	0	0	0	0	4	1	4	4	7	5	3	2	6	10	6	7	6	8	0	0	9	5	45.6621	4.6979	21.4402	6.20959	0	0	0	0	11.6349	5.24194	16.8979	23.1985	17.6961	18.389	6.5457	8.16733	12.3092	27.802	11.7791	20.8845	16.8628	39.0299	0
chr19_35697475_35697563_+	9	12	43	33	18	3	2	5	70	22	64	35	74	33	121	38	106	30	109	46	82	21	0	0	40	12	136.986	56.3748	184.386	68.3054	435.108	133.935	248.694	200.008	203.611	115.323	270.366	202.987	187.073	121.367	264.01	155.179	217.462	83.4061	213.987	137.241	230.458	102.454	0
chr2_192586534_192586609_-	1	1	9	3	0	0	0	0	7	1	7	3	11	3	9	1	10	4	15	4	8	1	0	0	9	2	15.2207	4.6979	38.5923	6.20959	0	0	0	0	20.3611	5.24194	29.5713	17.3989	27.8082	11.0334	19.6371	4.08367	20.5153	11.1208	29.4478	11.934	22.4837	4.87874	0
chr2_77300988_77301085_+	8	11	32	10	4	0	0	1	59	44	32	37	68	46	49	32	67	46	71	55	47	52	6	1	40	13	121.766	51.6769	137.217	20.6986	96.6908	0	0	40.0016	171.615	230.645	135.183	214.586	171.905	169.179	106.913	130.677	137.452	127.889	139.386	164.092	132.092	253.694	43.1841
chr13_68735009_68735010_+	3	1	9	3	0	0	0	1	5	2	3	1	11	2	7	3	8	4	12	5	10	4	0	0	3	2	45.6621	4.6979	38.5923	6.20959	0	0	0	40.0016	14.5437	10.4839	12.6734	5.79962	27.8082	7.35559	15.2733	12.251	16.4122	11.1208	23.5582	14.9175	28.1047	19.515	0
chr18_64182091_64182138_-	1	0	10	3	1	0	0	0	10	2	5	5	8	6	11	4	15	4	6	4	12	3	4	1	18	11	15.2207	0	42.8804	6.20959	24.1727	0	0	0	29.0874	10.4839	21.1224	28.9981	20.2241	22.0668	24.0009	16.3347	30.7729	11.1208	11.7791	11.934	33.7256	14.6362	28.7894
chr6_110043812_110043908_+	3	2	16	9	5	1	0	0	27	14	10	10	52	18	26	18	34	28	36	16	17	12	3	0	19	4	45.6621	9.3958	68.6086	18.6288	120.863	44.6449	0	0	78.5359	73.3872	42.2447	57.9962	131.457	66.2003	56.7294	73.506	69.7519	77.8457	70.6747	47.736	47.7779	58.5449	21.5921
chr12_40491378_40491431_+	6	13	90	55	14	3	5	8	140	46	124	29	163	37	192	44	189	54	228	85	185	37	2	0	69	17	91.3242	61.0727	385.923	113.842	338.418	133.935	621.736	320.013	407.223	241.129	523.834	168.189	412.067	136.078	418.925	179.681	387.738	150.131	447.606	253.597	519.936	180.513	14.3947
chr4_143859675_143859676_+	2	2	13	7	0	0	0	4	12	6	7	7	13	10	10	7	15	17	18	14	15	9	2	0	15	7	30.4414	9.3958	55.7445	14.489	0	0	0	160.006	34.9048	31.4517	29.5713	40.5974	32.8642	36.778	21.819	28.5857	30.7729	47.2634	35.3374	41.769	42.157	43.9087	14.3947
chr1_207318350_207318353_+	3	5	14	4	4	2	0	0	15	18	12	15	24	26	19	15	23	30	29	23	24	18	1	0	16	6	45.6621	23.4895	60.0325	8.27945	96.6908	89.2897	0	0	43.631	94.355	50.6937	86.9943	60.6724	95.6227	41.4561	61.255	47.1851	83.4061	56.9324	68.6205	67.4512	87.8173	7.19735
chr4_148949964_148950049_+	1	0	3	0	0	0	0	0	2	1	4	0	3	0	7	1	5	3	5	2	4	3	0	0	6	2	15.2207	0	12.8641	0	0	0	0	0	5.81747	5.24194	16.8979	0	7.58405	0	15.2733	4.08367	10.2576	8.34061	9.81593	5.967	11.2419	14.6362	0
chr6_110050478_110050578_+	6	6	23	11	2	0	0	1	15	8	5	10	23	19	16	11	33	16	29	9	16	8	5	1	26	9	91.3242	28.1874	98.6248	22.7685	48.3454	0	0	40.0016	43.631	41.9355	21.1224	57.9962	58.1444	69.8781	34.9104	44.9203	67.7004	44.4832	56.9324	26.8515	44.9674	39.0299	35.9868
chr3_71261720_71261728_+	7	8	49	40	15	2	2	3	106	18	80	19	97	27	140	22	120	31	125	37	112	35	1	2	80	14	106.545	37.5832	210.114	82.7945	362.59	89.2897	248.694	120.005	308.326	94.355	337.958	110.193	245.218	99.3005	305.466	89.8407	246.183	86.1863	245.398	110.389	314.772	170.756	7.19735
chr14_47379892_47379906_-	3	3	22	12	0	2	0	0	21	11	19	7	32	15	26	11	40	17	34	24	31	17	1	0	16	4	45.6621	14.0937	94.3368	24.8383	0	89.2897	0	0	61.0834	57.6614	80.265	40.5974	80.8965	55.1669	56.7294	44.9203	82.061	47.2634	66.7483	71.604	87.1244	82.9386	7.19735
chr6_41551938_41551999_+	5	6	47	31	0	0	0	3	34	4	9	3	39	9	33	4	49	11	40	17	32	7	0	0	42	4	76.1035	28.1874	201.538	64.1657	0	0	0	120.005	98.897	20.9678	38.0202	17.3989	98.5927	33.1002	72.0027	16.3347	100.525	30.5822	78.5275	50.7195	89.9349	34.1512	0
chr18_30752524_30752526_+	5	0	1	0	0	0	0	0	1	1	3	3	1	11	2	8	4	10	0	3	0	6	0	0	1	4	76.1035	0	4.28804	0	0	0	0	0	2.90874	5.24194	12.6734	17.3989	2.52802	40.4558	4.3638	32.6693	8.2061	27.802	0	8.95049	0	29.2724	0
chr5_30479208_30479209_+	1	2	11	4	1	0	0	0	13	3	4	3	10	2	11	3	13	6	20	7	16	5	0	0	15	2	15.2207	9.3958	47.1684	8.27945	24.1727	0	0	0	37.8136	15.7258	16.8979	17.3989	25.2802	7.35559	24.0009	12.251	26.6698	16.6812	39.2637	20.8845	44.9674	24.3937	0
chr18_28618975_28618981_+	1	0	17	8	0	0	0	0	9	0	5	4	9	5	12	2	12	4	19	1	15	4	0	0	8	4	15.2207	0	72.8966	16.5589	0	0	0	0	26.1786	0	21.1224	23.1985	22.7522	18.389	26.1828	8.16733	24.6183	11.1208	37.3005	2.9835	42.157	19.515	0
chr15_81375578_81375639_-	3	0	4	0	0	0	0	0	2	0	4	1	7	6	5	2	3	1	6	6	5	1	1	1	6	5	45.6621	0	17.1521	0	0	0	0	0	5.81747	0	16.8979	5.79962	17.6961	22.0668	10.9095	8.16733	6.15458	2.7802	11.7791	17.901	14.0523	4.87874	7.19735
chr7_55594294_55594379_+	14	10	25	18	5	4	0	5	46	60	38	65	63	99	47	63	67	114	74	87	45	73	2	5	20	21	213.09	46.979	107.201	37.2575	120.863	178.579	0	200.008	133.802	314.517	160.53	376.975	159.265	364.102	102.549	257.271	137.452	316.943	145.276	259.564	126.471	356.148	14.3947
chr9_74518683_74518760_+	9	13	30	16	5	1	0	2	39	29	23	37	42	32	34	32	42	40	51	45	50	26	6	5	59	24	136.986	61.0727	128.641	33.1178	120.863	44.6449	0	80.0032	113.441	152.016	97.1628	214.586	106.177	117.689	74.1846	130.677	86.1641	111.208	100.123	134.257	140.523	126.847	43.1841
chr8_4074657_4074715_+	0	0	11	2	0	0	0	1	6	2	6	2	8	6	8	2	12	3	16	0	7	1	0	0	8	0	0	0	47.1684	4.13972	0	0	0	40.0016	17.4524	10.4839	25.3468	11.5992	20.2241	22.0668	17.4552	8.16733	24.6183	8.34061	31.411	0	19.6733	4.87874	0
chr1_95071781_95071784_+	10	4	0	1	1	0	0	3	2	13	0	14	4	20	2	17	2	25	1	13	0	14	0	0	1	19	152.207	18.7916	0	2.06986	24.1727	0	0	120.005	5.81747	68.1452	0	81.1947	10.1121	73.5559	4.3638	69.4223	4.10305	69.5051	1.96319	38.7855	0	68.3023	0
chr4_152386948_152387023_+	1	3	32	14	1	0	1	0	23	9	8	5	32	12	27	4	25	17	37	11	29	8	3	0	21	7	15.2207	14.0937	137.217	28.9781	24.1727	0	124.347	0	66.9009	47.1775	33.7958	28.9981	80.8965	44.1335	58.9113	16.3347	51.2882	47.2634	72.6379	32.8185	81.5035	39.0299	21.5921
chr7_116850198_116850212_+	2	0	9	3	0	2	0	0	2	1	6	4	8	3	12	3	12	2	20	2	8	2	0	0	10	0	30.4414	0	38.5923	6.20959	0	89.2897	0	0	5.81747	5.24194	25.3468	23.1985	20.2241	11.0334	26.1828	12.251	24.6183	5.56041	39.2637	5.967	22.4837	9.75748	0
chr2_104273548_104273620_-	1	3	14	3	6	1	2	4	53	6	47	12	59	12	86	17	81	13	88	25	58	19	0	0	20	2	15.2207	14.0937	60.0325	6.20959	145.036	44.6449	248.694	160.006	154.163	31.4517	198.55	69.5955	149.153	44.1335	187.643	69.4223	166.174	36.1426	172.76	74.5875	163.007	92.696	0
chr4_182675981_182676060_-	2	3	30	18	3	1	0	1	48	11	24	5	55	16	47	16	51	18	77	9	38	15	1	1	38	7	30.4414	14.0937	128.641	37.2575	72.5181	44.6449	0	40.0016	139.619	57.6614	101.387	28.9981	139.041	58.8447	102.549	65.3387	104.628	50.0436	151.165	26.8515	106.798	73.1811	7.19735
chr12_35302225_35302285_+	86	58	35	32	12	4	0	11	62	206	34	143	58	300	54	151	56	308	62	239	33	224	2	11	17	103	1308.98	272.478	150.081	66.2356	290.072	178.579	0	440.018	180.342	1079.84	143.632	829.346	146.625	1103.34	117.823	616.634	114.885	856.302	121.718	713.056	92.7453	1092.84	14.3947
chr3_44185569_44185630_+	9	7	12	5	1	0	0	0	11	13	6	14	16	23	17	9	17	30	12	17	11	15	2	2	13	10	136.986	32.8853	51.4564	10.3493	24.1727	0	0	0	31.9961	68.1452	25.3468	81.1947	40.4483	84.5893	37.0923	36.753	34.8759	83.4061	23.5582	50.7195	30.9151	73.1811	14.3947
chr1_207354391_207354392_+	8	7	39	17	1	2	0	1	36	24	26	23	43	27	31	17	37	28	54	40	40	29	7	3	25	18	121.766	32.8853	167.233	35.1877	24.1727	89.2897	0	40.0016	104.714	125.807	109.836	133.391	108.705	99.3005	67.6389	69.4223	75.9065	77.8457	106.012	119.34	112.419	141.483	50.3815
chr19_41649131_41649134_-	2	0	5	2	0	0	0	0	8	6	4	9	9	8	12	8	6	6	14	10	11	4	0	1	8	5	30.4414	0	21.4402	4.13972	0	0	0	0	23.2699	31.4517	16.8979	52.1966	22.7522	29.4224	26.1828	32.6693	12.3092	16.6812	27.4846	29.835	30.9151	19.515	0
chr6_2443799_2443861_+	3	3	10	0	1	0	0	1	9	6	7	4	5	8	10	11	16	13	24	16	8	6	0	0	3	4	45.6621	14.0937	42.8804	0	24.1727	0	0	40.0016	26.1786	31.4517	29.5713	23.1985	12.6401	29.4224	21.819	44.9203	32.8244	36.1426	47.1165	47.736	22.4837	29.2724	0
chr6_3236934_3237013_+	34	32	88	48	9	1	2	17	72	65	49	71	91	85	59	55	68	90	98	104	53	45	19	13	129	65	517.504	150.333	377.347	99.3534	217.554	44.6449	248.694	680.027	209.429	340.726	206.999	411.773	230.05	312.613	128.732	224.602	139.504	250.218	192.392	310.284	148.955	219.543	136.75
chr1_94839282_94839294_+	10	11	7	4	2	1	3	15	8	21	10	18	15	29	8	20	12	27	9	32	8	23	0	0	18	18	152.207	51.6769	30.0163	8.27945	48.3454	44.6449	373.042	600.024	23.2699	110.081	42.2447	104.393	37.9203	106.656	17.4552	81.6733	24.6183	75.0655	17.6687	95.4719	22.4837	112.211	0
chr1_80309843_80309844_-	0	0	0	0	0	0	0	0	0	0	0	0	1	0	0	0	0	0	0	0	0	0	0	0	16	8	0	0	0	0	0	0	0	0	0	0	0	0	2.52802	0	0	0	0	0	0	0	0	0	0
chr17_83552494_83552584_+	2	1	10	4	2	0	0	0	12	4	4	3	8	1	8	0	19	6	13	4	9	4	1	1	9	6	30.4414	4.6979	42.8804	8.27945	48.3454	0	0	0	34.9048	20.9678	16.8979	17.3989	20.2241	3.6778	17.4552	0	38.979	16.6812	25.5214	11.934	25.2942	19.515	7.19735
chr4_143868937_143868940_+	2	3	4	1	1	1	0	2	11	17	4	7	12	16	12	10	10	16	7	11	11	15	1	0	16	9	30.4414	14.0937	17.1521	2.06986	24.1727	44.6449	0	80.0032	31.9961	89.113	16.8979	40.5974	30.3362	58.8447	26.1828	40.8367	20.5153	44.4832	13.7423	32.8185	30.9151	73.1811	7.19735
chr4_152343704_152343706_+	3	0	12	4	3	0	0	1	27	5	24	3	22	1	29	5	37	4	39	5	23	9	0	0	5	0	45.6621	0	51.4564	8.27945	72.5181	0	0	40.0016	78.5359	26.2097	101.387	17.3989	55.6164	3.6778	63.2751	20.4183	75.9065	11.1208	76.5643	14.9175	64.6407	43.9087	0
chr10_71472936_71472990_+	3	0	5	0	0	0	0	0	7	2	7	1	10	1	2	3	5	2	9	3	5	1	0	0	1	1	45.6621	0	21.4402	0	0	0	0	0	20.3611	10.4839	29.5713	5.79962	25.2802	3.6778	4.3638	12.251	10.2576	5.56041	17.6687	8.95049	14.0523	4.87874	0
chr19_24784689_24784693_-	0	1	0	0	6	5	1	5	18	24	32	24	30	23	23	31	32	29	44	31	27	30	1	0	21	11	0	4.6979	0	0	145.036	223.224	124.347	200.008	52.3572	125.807	135.183	139.191	75.8405	84.5893	50.1837	126.594	65.6488	80.6259	86.3802	92.4884	75.8826	146.362	7.19735
chr2_116143418_116143480_+	1	0	12	7	1	0	2	0	19	2	7	1	23	0	47	3	38	7	41	3	22	3	1	0	19	1	15.2207	0	51.4564	14.489	24.1727	0	248.694	0	55.266	10.4839	29.5713	5.79962	58.1444	0	102.549	12.251	77.958	19.4614	80.4906	8.95049	61.8302	14.6362	7.19735
chr13_1641702_1641778_-	3	1	1	0	0	0	0	1	4	22	2	26	5	58	2	28	7	58	9	59	2	46	0	2	3	21	45.6621	4.6979	4.28804	0	0	0	0	40.0016	11.6349	115.323	8.44894	150.79	12.6401	213.312	4.3638	114.343	14.3607	161.252	17.6687	176.026	5.62093	224.422	0
chr14_83456475_83456478_-	1	0	5	0	0	0	0	0	10	4	6	3	7	3	9	4	4	3	8	2	8	7	0	0	3	2	15.2207	0	21.4402	0	0	0	0	0	29.0874	20.9678	25.3468	17.3989	17.6961	11.0334	19.6371	16.3347	8.2061	8.34061	15.7055	5.967	22.4837	34.1512	0
chr4_10547796_10547887_-	2	1	10	4	0	1	0	0	7	3	6	2	8	5	6	3	10	4	16	4	17	2	1	0	8	3	30.4414	4.6979	42.8804	8.27945	0	44.6449	0	0	20.3611	15.7258	25.3468	11.5992	20.2241	18.389	13.0914	12.251	20.5153	11.1208	31.411	11.934	47.7779	9.75748	7.19735
chr4_166802056_166802058_+	2	1	13	2	7	0	0	3	20	5	15	9	25	8	31	9	28	9	45	9	21	8	1	0	9	0	30.4414	4.6979	55.7445	4.13972	169.209	0	0	120.005	58.1747	26.2097	63.3671	52.1966	63.2004	29.4224	67.6389	36.753	57.4427	25.0218	88.3434	26.8515	59.0198	39.0299	7.19735
chr4_44277677_44277684_-	0	0	2	1	4	1	2	6	46	7	29	12	51	10	44	17	62	11	62	14	53	9	0	0	18	3	0	0	8.57607	2.06986	96.6908	44.6449	248.694	240.01	133.802	36.6936	122.51	69.5955	128.929	36.778	96.0036	69.4223	127.195	30.5822	121.718	41.769	148.955	43.9087	0
chr9_93254610_93254612_-	5	4	17	8	10	2	2	5	53	14	41	12	69	21	64	13	59	22	63	20	69	25	3	2	27	6	76.1035	18.7916	72.8966	16.5589	241.727	89.2897	248.694	200.008	154.163	73.3872	173.203	69.5955	174.433	77.2337	139.642	53.0877	121.04	61.1645	123.681	59.67	193.922	121.968	21.5921
chr4_143898638_143898639_+	5	2	9	7	0	1	0	0	8	9	3	5	3	14	3	6	7	13	9	15	9	8	2	1	12	14	76.1035	9.3958	38.5923	14.489	0	44.6449	0	0	23.2699	47.1775	12.6734	28.9981	7.58405	51.4891	6.5457	24.502	14.3607	36.1426	17.6687	44.7525	25.2942	39.0299	14.3947
chr15_55641360_55641395_-	3	1	12	6	1	0	0	0	11	4	6	3	8	7	16	12	18	10	12	10	13	10	2	1	11	6	45.6621	4.6979	51.4564	12.4192	24.1727	0	0	0	31.9961	20.9678	25.3468	17.3989	20.2241	25.7446	34.9104	49.004	36.9275	27.802	23.5582	29.835	36.536	48.7874	14.3947
chr8_125582030_125582085_+	4	4	28	19	6	1	2	2	58	6	44	3	59	10	68	11	62	12	88	17	65	12	4	0	29	9	60.8828	18.7916	120.065	39.3274	145.036	44.6449	248.694	80.0032	168.707	31.4517	185.877	17.3989	149.153	36.778	148.369	44.9203	127.195	33.3624	172.76	50.7195	182.68	58.5449	28.7894
chrX_33007002_33007061_+	1	2	5	2	0	0	1	1	2	0	4	3	5	1	11	3	9	6	11	2	5	4	1	0	20	6	15.2207	9.3958	21.4402	4.13972	0	0	124.347	40.0016	5.81747	0	16.8979	17.3989	12.6401	3.6778	24.0009	12.251	18.4637	16.6812	21.595	5.967	14.0523	19.515	7.19735
chr4_37796228_37796230_-	8	5	4	3	1	1	0	0	1	10	3	9	4	15	4	14	1	12	3	15	4	12	0	1	5	13	121.766	23.4895	17.1521	6.20959	24.1727	44.6449	0	0	2.90874	52.4194	12.6734	52.1966	10.1121	55.1669	8.7276	57.1713	2.05153	33.3624	5.88956	44.7525	11.2419	58.5449	0
chr10_1530967_1531044_+	8	4	38	33	17	0	0	7	65	20	69	15	79	24	100	29	97	32	104	27	85	22	0	0	22	3	121.766	18.7916	162.945	68.3054	410.936	0	0	280.011	189.068	104.839	291.489	86.9943	199.713	88.2671	218.19	118.426	198.998	88.9665	204.171	80.5545	238.89	107.332	0
chr4_56817196_56817242_+	5	2	3	0	2	0	0	0	10	11	7	5	12	14	7	13	11	14	15	14	9	7	0	1	10	5	76.1035	9.3958	12.8641	0	48.3454	0	0	0	29.0874	57.6614	29.5713	28.9981	30.3362	51.4891	15.2733	53.0877	22.5668	38.9228	29.4478	41.769	25.2942	34.1512	0
chr15_806740_806786_+	8	3	3	2	0	0	0	0	0	10	2	4	1	15	2	7	3	11	0	11	2	12	0	0	4	6	121.766	14.0937	12.8641	4.13972	0	0	0	0	0	52.4194	8.44894	23.1985	2.52802	55.1669	4.3638	28.5857	6.15458	30.5822	0	32.8185	5.62093	58.5449	0
chr9_61393725_61393790_+	5	1	2	0	0	0	0	0	1	8	2	4	1	10	0	9	2	7	0	21	0	9	0	0	2	3	76.1035	4.6979	8.57607	0	0	0	0	0	2.90874	41.9355	8.44894	23.1985	2.52802	36.778	0	36.753	4.10305	19.4614	0	62.6535	0	43.9087	0
chr14_16478834_16478898_-	18	23	58	41	4	2	1	2	80	40	45	48	99	71	57	38	100	72	117	87	91	61	3	2	58	17	273.973	108.052	248.706	84.8643	96.6908	89.2897	124.347	80.0032	232.699	209.678	190.101	278.382	250.274	261.123	124.368	155.179	205.153	200.175	229.693	259.564	255.752	297.603	21.5921
chr9_36314571_36314631_+	6	4	6	6	2	0	0	1	10	5	1	5	20	13	14	8	14	14	14	9	15	7	1	0	23	9	91.3242	18.7916	25.7282	12.4192	48.3454	0	0	40.0016	29.0874	26.2097	4.22447	28.9981	50.5603	47.8113	30.5466	32.6693	28.7214	38.9228	27.4846	26.8515	42.157	34.1512	7.19735
chr1_125287327_125287419_-	1	0	3	0	0	0	0	0	1	0	2	0	3	2	4	3	11	2	2	6	0	0	0	0	8	1	15.2207	0	12.8641	0	0	0	0	0	2.90874	0	8.44894	0	7.58405	7.35559	8.7276	12.251	22.5668	5.56041	3.92637	17.901	0	0	0
chr8_85379288_85379293_-	2	1	14	7	2	2	0	1	30	8	13	10	30	14	19	15	35	18	34	20	21	10	1	1	11	7	30.4414	4.6979	60.0325	14.489	48.3454	89.2897	0	40.0016	87.2621	41.9355	54.9181	57.9962	75.8405	51.4891	41.4561	61.255	71.8034	50.0436	66.7483	59.67	59.0198	48.7874	7.19735
chr2_53945602_53945664_+	2	3	15	8	1	0	0	0	10	4	10	6	9	9	13	5	22	11	16	8	12	6	1	0	18	5	30.4414	14.0937	64.3205	16.5589	24.1727	0	0	0	29.0874	20.9678	42.2447	34.7977	22.7522	33.1002	28.3647	20.4183	45.1336	30.5822	31.411	23.868	33.7256	29.2724	7.19735
chr10_39029320_39029384_+	4	8	60	35	3	4	0	3	84	11	50	14	99	23	121	16	125	28	120	31	106	20	1	0	58	6	60.8828	37.5832	257.282	72.4452	72.5181	178.579	0	120.005	244.334	57.6614	211.224	81.1947	250.274	84.5893	264.01	65.3387	256.441	77.8457	235.582	92.4884	297.909	97.5748	7.19735
chr10_83046232_83046242_-	3	2	2	0	0	1	0	1	4	5	3	7	5	8	3	14	3	12	4	13	1	8	0	0	5	8	45.6621	9.3958	8.57607	0	0	44.6449	0	40.0016	11.6349	26.2097	12.6734	40.5974	12.6401	29.4224	6.5457	57.1713	6.15458	33.3624	7.85275	38.7855	2.81047	39.0299	0
chr2_182764876_182764907_-	0	2	1	0	11	4	0	6	41	15	37	22	69	17	80	30	69	28	65	37	47	21	0	0	33	9	0	9.3958	4.28804	0	265.9	178.579	0	240.01	119.258	78.6291	156.305	127.592	174.433	62.5225	174.552	122.51	141.555	77.8457	127.607	110.389	132.092	102.454	0
chr10_55445368_55445376_+	21	33	113	67	30	9	3	15	162	66	140	61	194	90	181	82	193	104	204	119	188	91	11	1	118	42	319.635	155.031	484.548	138.681	725.181	401.804	373.042	600.024	471.215	345.968	591.426	353.777	490.435	331.002	394.924	334.861	395.945	289.141	400.49	355.036	528.367	443.965	79.1709
chr7_27868257_27868298_+	3	2	31	19	3	1	0	0	33	16	24	8	36	17	33	8	40	16	47	14	39	8	10	2	51	12	45.6621	9.3958	132.929	39.3274	72.5181	44.6449	0	0	95.9883	83.8711	101.387	46.397	91.0086	62.5225	72.0027	32.6693	82.061	44.4832	92.2698	41.769	109.608	39.0299	71.9735
chr1_207351706_207351707_+	4	7	14	9	1	1	1	1	10	18	12	10	17	24	10	9	12	18	19	20	21	17	1	0	21	17	60.8828	32.8853	60.0325	18.6288	24.1727	44.6449	124.347	40.0016	29.0874	94.355	50.6937	57.9962	42.9763	88.2671	21.819	36.753	24.6183	50.0436	37.3005	59.67	59.0198	82.9386	7.19735
chr16_71295489_71295566_+	4	3	12	4	0	0	1	0	3	7	6	5	9	4	5	9	9	14	7	10	4	4	1	0	7	2	60.8828	14.0937	51.4564	8.27945	0	0	124.347	0	8.72621	36.6936	25.3468	28.9981	22.7522	14.7112	10.9095	36.753	18.4637	38.9228	13.7423	29.835	11.2419	19.515	7.19735
chr1_207356693_207356695_+	4	1	4	2	2	2	0	1	10	6	2	5	7	8	12	3	9	10	10	12	9	11	0	0	7	3	60.8828	4.6979	17.1521	4.13972	48.3454	89.2897	0	40.0016	29.0874	31.4517	8.44894	28.9981	17.6961	29.4224	26.1828	12.251	18.4637	27.802	19.6319	35.802	25.2942	53.6661	0
chr13_22855855_22855927_+	111	99	192	103	63	70	6	29	193	300	124	268	229	341	139	201	168	280	265	384	210	284	13	15	89	87	1689.5	465.092	823.303	213.196	1522.88	3125.14	746.083	1160.05	561.386	1572.58	523.834	1554.3	578.916	1254.13	303.284	820.817	344.656	778.457	520.244	1145.66	590.198	1385.56	93.5656
chr4_116862204_116862238_-	2	3	10	4	9	1	2	6	56	19	37	14	62	26	67	25	74	35	66	42	62	20	0	0	19	3	30.4414	14.0937	42.8804	8.27945	217.554	44.6449	248.694	240.01	162.889	99.5969	156.305	81.1947	156.737	95.6227	146.187	102.092	151.813	97.3071	129.57	125.307	174.249	97.5748	0
chrX_56615190_56615290_-	6	4	50	35	4	1	0	3	86	12	38	12	95	21	37	13	77	19	114	21	63	9	4	2	41	6	91.3242	18.7916	214.402	72.4452	96.6908	44.6449	0	120.005	250.151	62.9033	160.53	69.5955	240.162	77.2337	80.7303	53.0877	157.968	52.8239	223.803	62.6535	177.059	43.9087	28.7894
chr3_116826359_116826409_+	11	4	5	2	1	0	0	3	6	31	7	21	8	50	8	38	7	61	8	47	4	41	2	1	2	16	167.428	18.7916	21.4402	4.13972	24.1727	0	0	120.005	17.4524	162.5	29.5713	121.792	20.2241	183.89	17.4552	155.179	14.3607	169.592	15.7055	140.224	11.2419	200.028	14.3947
chr7_10928788_10928821_-	1	0	8	2	0	1	0	1	8	5	5	2	15	6	18	5	13	6	20	7	20	5	0	0	5	1	15.2207	0	34.3043	4.13972	0	44.6449	0	40.0016	23.2699	26.2097	21.1224	11.5992	37.9203	22.0668	39.2742	20.4183	26.6698	16.6812	39.2637	20.8845	56.2093	24.3937	0
chr6_3255519_3255550_+	1	2	10	4	4	1	0	8	15	28	11	33	19	48	18	39	27	50	26	37	11	26	0	3	19	15	15.2207	9.3958	42.8804	8.27945	96.6908	44.6449	0	320.013	43.631	146.774	46.4692	191.388	48.0323	176.534	39.2742	159.263	55.3912	139.01	51.0428	110.389	30.9151	126.847	0
chr6_71756215_71756267_-	3	3	9	6	0	0	0	0	17	6	17	4	18	9	11	8	17	5	31	11	13	4	1	0	13	9	45.6621	14.0937	38.5923	12.4192	0	0	0	0	49.4485	31.4517	71.816	23.1985	45.5043	33.1002	24.0009	32.6693	34.8759	13.901	60.8588	32.8185	36.536	19.515	7.19735
chr7_121453204_121453233_+	1	4	14	7	8	5	2	0	76	27	65	23	98	24	87	33	103	43	130	45	79	27	0	0	32	11	15.2207	18.7916	60.0325	14.489	193.382	223.224	248.694	0	221.064	141.532	274.591	133.391	247.746	88.2671	189.825	134.761	211.307	119.549	255.214	134.257	222.027	131.726	0
chr11_29816336_29816342_-	3	6	20	11	7	1	2	7	55	20	50	18	57	28	62	32	59	28	56	29	48	23	0	0	27	8	45.6621	28.1874	85.7607	22.7685	169.209	44.6449	248.694	280.011	159.98	104.839	211.224	104.393	144.097	102.978	135.278	130.677	121.04	77.8457	109.938	86.5214	134.902	112.211	0
chr5_128905602_128905682_+	8	4	2	2	0	1	0	0	2	12	2	9	1	24	0	15	4	34	6	30	1	18	0	0	8	9	121.766	18.7916	8.57607	4.13972	0	44.6449	0	0	5.81747	62.9033	8.44894	52.1966	2.52802	88.2671	0	61.255	8.2061	94.5269	11.7791	89.5049	2.81047	87.8173	0
chr7_85453912_85454011_+	2	0	28	7	4	1	1	1	41	10	37	6	51	9	65	15	61	21	87	18	51	10	4	1	14	3	30.4414	0	120.065	14.489	96.6908	44.6449	124.347	40.0016	119.258	52.4194	156.305	34.7977	128.929	33.1002	141.824	61.255	125.143	58.3843	170.797	53.703	143.334	48.7874	28.7894
chr1_93719822_93719835_+	2	4	3	1	2	3	3	6	6	11	6	14	12	25	10	41	7	26	12	30	9	20	2	0	20	29	30.4414	18.7916	12.8641	2.06986	48.3454	133.935	373.042	240.01	17.4524	57.6614	25.3468	81.1947	30.3362	91.9449	21.819	167.43	14.3607	72.2853	23.5582	89.5049	25.2942	97.5748	14.3947
chr7_115216211_115216213_-	9	7	26	21	4	4	1	1	32	17	30	18	38	18	42	14	46	17	65	37	32	18	3	3	29	15	136.986	32.8853	111.489	43.4671	96.6908	178.579	124.347	40.0016	93.0795	89.113	126.734	104.393	96.0646	66.2003	91.6398	57.1713	94.3702	47.2634	127.607	110.389	89.9349	87.8173	21.5921
chr9_35474883_35474944_-	1	1	6	0	1	0	0	0	5	2	1	0	5	3	11	5	9	2	7	5	5	1	0	0	6	1	15.2207	4.6979	25.7282	0	24.1727	0	0	0	14.5437	10.4839	4.22447	0	12.6401	11.0334	24.0009	20.4183	18.4637	5.56041	13.7423	14.9175	14.0523	4.87874	0
chr20_9897049_9897115_+	2	3	12	6	0	1	0	0	9	7	6	18	13	22	12	15	9	20	13	36	8	16	2	0	12	19	30.4414	14.0937	51.4564	12.4192	0	44.6449	0	0	26.1786	36.6936	25.3468	104.393	32.8642	80.9115	26.1828	61.255	18.4637	55.6041	25.5214	107.406	22.4837	78.0598	14.3947
chr6_26343124_26343142_+	1	2	11	3	0	0	0	1	8	7	13	1	16	10	14	3	11	8	20	16	21	5	1	0	8	7	15.2207	9.3958	47.1684	6.20959	0	0	0	40.0016	23.2699	36.6936	54.9181	5.79962	40.4483	36.778	30.5466	12.251	22.5668	22.2416	39.2637	47.736	59.0198	24.3937	7.19735
chr8_73725602_73725623_+	0	0	1	0	10	1	3	6	58	14	59	16	67	12	84	31	83	24	90	21	65	20	0	0	14	4	0	0	4.28804	0	241.727	44.6449	373.042	240.01	168.707	73.3872	249.244	92.794	169.377	44.1335	183.28	126.594	170.277	66.7249	176.687	62.6535	182.68	97.5748	0
chr1_64146596_64146597_-	5	3	8	6	3	3	0	3	12	6	3	6	10	16	13	11	10	11	14	9	5	8	3	0	16	11	76.1035	14.0937	34.3043	12.4192	72.5181	133.935	0	120.005	34.9048	31.4517	12.6734	34.7977	25.2802	58.8447	28.3647	44.9203	20.5153	30.5822	27.4846	26.8515	14.0523	39.0299	21.5921
chr8_4945797_4945895_-	13	9	28	17	2	1	0	1	45	21	27	22	61	33	22	15	50	35	29	36	20	13	7	5	30	19	197.869	42.2811	120.065	35.1877	48.3454	44.6449	0	40.0016	130.893	110.081	114.061	127.592	154.209	121.367	48.0018	61.255	102.576	97.3071	56.9324	107.406	56.2093	63.4236	50.3815
chr3_13783821_13783822_+	4	1	1	0	0	0	0	0	1	9	1	9	1	16	1	9	1	12	4	22	2	14	0	0	2	7	60.8828	4.6979	4.28804	0	0	0	0	0	2.90874	47.1775	4.22447	52.1966	2.52802	58.8447	2.1819	36.753	2.05153	33.3624	7.85275	65.637	5.62093	68.3023	0
chr7_120721787_120721884_+	10	16	36	26	27	11	5	11	142	61	156	54	181	59	189	73	195	95	247	111	213	81	1	0	47	16	152.207	75.1664	154.369	53.8164	652.663	491.093	621.736	440.018	413.04	319.758	659.018	313.18	457.571	216.99	412.379	298.108	400.048	264.119	484.907	331.168	598.629	395.178	7.19735
chr20_9817877_9817919_+	0	0	8	1	1	0	0	1	9	5	7	3	12	9	10	8	7	13	11	5	11	4	0	0	5	2	0	0	34.3043	2.06986	24.1727	0	0	40.0016	26.1786	26.2097	29.5713	17.3989	30.3362	33.1002	21.819	32.6693	14.3607	36.1426	21.595	14.9175	30.9151	19.515	0
chr3_108091359_108091366_+	1	3	5	0	3	0	4	3	11	10	10	10	15	4	18	5	19	6	24	6	20	5	0	0	12	8	15.2207	14.0937	21.4402	0	72.5181	0	497.389	120.005	31.9961	52.4194	42.2447	57.9962	37.9203	14.7112	39.2742	20.4183	38.979	16.6812	47.1165	17.901	56.2093	24.3937	0
chr14_77932357_77932359_+	2	1	9	3	0	0	1	2	5	4	5	5	2	7	2	4	5	8	8	11	7	6	3	0	12	6	30.4414	4.6979	38.5923	6.20959	0	0	124.347	80.0032	14.5437	20.9678	21.1224	28.9981	5.05603	25.7446	4.3638	16.3347	10.2576	22.2416	15.7055	32.8185	19.6733	29.2724	21.5921
chr2_144665706_144665796_+	1	0	8	4	0	0	0	0	4	1	1	1	7	4	4	0	5	3	6	0	7	1	0	0	9	5	15.2207	0	34.3043	8.27945	0	0	0	0	11.6349	5.24194	4.22447	5.79962	17.6961	14.7112	8.7276	0	10.2576	8.34061	11.7791	0	19.6733	4.87874	0
chr7_10396947_10396952_-	29	47	78	61	23	13	11	28	79	50	102	65	121	64	117	73	128	83	127	75	113	63	0	0	57	43	441.4	220.801	334.467	126.262	555.972	580.383	1367.82	1120.04	229.79	262.097	430.896	376.975	305.89	235.379	255.282	298.108	262.595	230.757	249.325	223.762	317.583	307.361	0
chr15_59790398_59790494_-	1	1	8	0	0	0	0	3	4	0	6	1	12	2	8	2	10	7	10	2	7	1	0	1	8	2	15.2207	4.6979	34.3043	0	0	0	0	120.005	11.6349	0	25.3468	5.79962	30.3362	7.35559	17.4552	8.16733	20.5153	19.4614	19.6319	5.967	19.6733	4.87874	0
chr6_98923100_98923173_+	1	1	14	5	2	4	1	1	38	6	45	10	50	5	44	4	58	9	67	7	56	14	0	0	8	1	15.2207	4.6979	60.0325	10.3493	48.3454	178.579	124.347	40.0016	110.532	31.4517	190.101	57.9962	126.401	18.389	96.0036	16.3347	118.989	25.0218	131.533	20.8845	157.386	68.3023	0
chr4_152395686_152395751_+	4	5	20	13	0	1	0	1	15	6	12	11	17	17	21	6	10	6	24	16	17	7	3	2	23	13	60.8828	23.4895	85.7607	26.9082	0	44.6449	0	40.0016	43.631	31.4517	50.6937	63.7959	42.9763	62.5225	45.8199	24.502	20.5153	16.6812	47.1165	47.736	47.7779	34.1512	21.5921
chr5_63246609_63246693_-	18	6	3	5	2	0	1	5	0	20	8	22	4	44	5	28	2	44	3	49	2	36	2	4	7	42	273.973	28.1874	12.8641	10.3493	48.3454	0	124.347	200.008	0	104.839	33.7958	127.592	10.1121	161.823	10.9095	114.343	4.10305	122.329	5.88956	146.191	5.62093	175.635	14.3947
chr9_53027452_53027479_-	3	0	3	0	0	0	0	1	4	1	0	1	5	0	5	1	3	3	8	1	3	2	0	0	2	1	45.6621	0	12.8641	0	0	0	0	40.0016	11.6349	5.24194	0	5.79962	12.6401	0	10.9095	4.08367	6.15458	8.34061	15.7055	2.9835	8.4314	9.75748	0
chr4_30539567_30539650_+	1	1	7	1	0	0	0	0	7	2	5	1	10	3	3	1	5	0	8	1	4	0	0	0	5	2	15.2207	4.6979	30.0163	2.06986	0	0	0	0	20.3611	10.4839	21.1224	5.79962	25.2802	11.0334	6.5457	4.08367	10.2576	0	15.7055	2.9835	11.2419	0	0
chr10_10891192_10891219_+	2	2	13	8	3	0	1	0	23	1	13	1	19	3	29	1	32	8	36	1	28	5	0	0	19	3	30.4414	9.3958	55.7445	16.5589	72.5181	0	124.347	0	66.9009	5.24194	54.9181	5.79962	48.0323	11.0334	63.2751	4.08367	65.6488	22.2416	70.6747	2.9835	78.693	24.3937	0
chr18_117985_118043_-	1	0	8	3	4	1	0	1	23	17	16	9	34	14	30	9	45	13	25	11	21	8	1	0	11	2	15.2207	0	34.3043	6.20959	96.6908	44.6449	0	40.0016	66.9009	89.113	67.5915	52.1966	85.9526	51.4891	65.457	36.753	92.3187	36.1426	49.0797	32.8185	59.0198	39.0299	7.19735
chr6_110052979_110053033_+	4	3	10	3	0	1	0	2	8	3	6	4	13	6	10	4	12	9	18	4	5	2	1	1	14	3	60.8828	14.0937	42.8804	6.20959	0	44.6449	0	80.0032	23.2699	15.7258	25.3468	23.1985	32.8642	22.0668	21.819	16.3347	24.6183	25.0218	35.3374	11.934	14.0523	9.75748	7.19735
chr5_148492262_148492286_-	3	2	6	0	1	2	1	0	13	3	18	3	11	3	16	2	10	3	14	1	9	3	0	0	5	2	45.6621	9.3958	25.7282	0	24.1727	89.2897	124.347	0	37.8136	15.7258	76.0405	17.3989	27.8082	11.0334	34.9104	8.16733	20.5153	8.34061	27.4846	2.9835	25.2942	14.6362	0
chr18_56918390_56918453_+	2	3	5	2	0	0	1	1	5	7	6	5	8	9	5	10	8	10	8	7	7	5	0	1	13	10	30.4414	14.0937	21.4402	4.13972	0	0	124.347	40.0016	14.5437	36.6936	25.3468	28.9981	20.2241	33.1002	10.9095	40.8367	16.4122	27.802	15.7055	20.8845	19.6733	24.3937	0
chr13_40803989_40804044_+	1	6	20	4	10	6	5	3	95	15	87	8	109	9	160	41	166	32	177	20	109	21	0	0	50	9	15.2207	28.1874	85.7607	8.27945	241.727	267.869	621.736	120.005	276.33	78.6291	367.529	46.397	275.554	33.1002	349.104	167.43	340.553	88.9665	347.484	59.67	306.341	102.454	0
chr4_149845794_149845872_-	2	4	6	4	0	0	0	1	8	7	7	12	12	17	6	6	6	24	6	18	7	13	0	0	17	18	30.4414	18.7916	25.7282	8.27945	0	0	0	40.0016	23.2699	36.6936	29.5713	69.5955	30.3362	62.5225	13.0914	24.502	12.3092	66.7249	11.7791	53.703	19.6733	63.4236	0
chr1_234618830_234618884_-	3	5	15	2	0	1	0	0	7	3	8	9	10	6	4	8	6	15	12	13	6	2	1	0	14	4	45.6621	23.4895	64.3205	4.13972	0	44.6449	0	0	20.3611	15.7258	33.7958	52.1966	25.2802	22.0668	8.7276	32.6693	12.3092	41.703	23.5582	38.7855	16.8628	9.75748	7.19735
chr7_95919602_95919649_+	2	1	21	10	1	1	0	1	17	11	8	10	25	13	18	5	23	14	30	12	23	12	1	2	16	5	30.4414	4.6979	90.0488	20.6986	24.1727	44.6449	0	40.0016	49.4485	57.6614	33.7958	57.9962	63.2004	47.8113	39.2742	20.4183	47.1851	38.9228	58.8956	35.802	64.6407	58.5449	7.19735
chr1_94808129_94808132_+	9	7	7	6	2	11	0	24	11	29	11	38	7	29	6	28	5	35	6	33	7	28	0	0	6	17	136.986	32.8853	30.0163	12.4192	48.3454	491.093	0	960.038	31.9961	152.016	46.4692	220.386	17.6961	106.656	13.0914	114.343	10.2576	97.3071	11.7791	98.4554	19.6733	136.605	0
chr11_68378513_68378608_+	3	0	12	4	0	0	0	0	16	10	7	5	13	9	3	8	9	11	10	11	8	12	2	1	7	4	45.6621	0	51.4564	8.27945	0	0	0	0	46.5398	52.4194	29.5713	28.9981	32.8642	33.1002	6.5457	32.6693	18.4637	30.5822	19.6319	32.8185	22.4837	58.5449	14.3947
chr6_128870727_128870728_-	2	1	6	2	1	0	0	0	0	4	3	2	4	3	2	3	1	6	5	6	5	5	1	0	6	8	30.4414	4.6979	25.7282	4.13972	24.1727	0	0	0	0	20.9678	12.6734	11.5992	10.1121	11.0334	4.3638	12.251	2.05153	16.6812	9.81593	17.901	14.0523	24.3937	7.19735
chr10_53190230_53190231_-	3	1	2	0	0	0	0	1	3	4	1	4	1	7	0	4	2	9	0	9	2	4	0	0	1	9	45.6621	4.6979	8.57607	0	0	0	0	40.0016	8.72621	20.9678	4.22447	23.1985	2.52802	25.7446	0	16.3347	4.10305	25.0218	0	26.8515	5.62093	19.515	0
chr17_85596440_85596442_-	1	0	8	4	1	0	0	0	7	7	6	5	5	6	6	1	7	3	12	5	3	2	0	0	8	4	15.2207	0	34.3043	8.27945	24.1727	0	0	0	20.3611	36.6936	25.3468	28.9981	12.6401	22.0668	13.0914	4.08367	14.3607	8.34061	23.5582	14.9175	8.4314	9.75748	0
chr15_60917004_60917034_-	2	1	6	0	2	0	0	0	1	0	1	1	4	6	3	2	5	4	10	5	1	8	0	0	3	1	30.4414	4.6979	25.7282	0	48.3454	0	0	0	2.90874	0	4.22447	5.79962	10.1121	22.0668	6.5457	8.16733	10.2576	11.1208	19.6319	14.9175	2.81047	39.0299	0
chr15_4147288_4147324_+	7	5	51	41	3	0	0	4	42	6	49	3	68	19	76	12	70	8	89	26	63	9	4	0	36	4	106.545	23.4895	218.69	84.8643	72.5181	0	0	160.006	122.167	31.4517	206.999	17.3989	171.905	69.8781	165.824	49.004	143.607	22.2416	174.724	77.571	177.059	43.9087	28.7894
chr6_109945785_109945798_+	0	0	1	0	3	0	2	0	15	6	10	4	24	10	28	11	27	14	22	12	15	9	0	0	12	5	0	0	4.28804	0	72.5181	0	248.694	0	43.631	31.4517	42.2447	23.1985	60.6724	36.778	61.0932	44.9203	55.3912	38.9228	43.1901	35.802	42.157	43.9087	0
chr1_204853920_204853921_+	7	3	4	3	0	1	0	0	4	12	2	11	7	14	3	8	6	16	8	15	5	11	0	1	3	11	106.545	14.0937	17.1521	6.20959	0	44.6449	0	0	11.6349	62.9033	8.44894	63.7959	17.6961	51.4891	6.5457	32.6693	12.3092	44.4832	15.7055	44.7525	14.0523	53.6661	0
chr13_31212378_31212424_+	1	1	7	2	0	0	0	0	4	0	1	1	2	1	1	0	3	3	3	0	1	1	0	0	7	2	15.2207	4.6979	30.0163	4.13972	0	0	0	0	11.6349	0	4.22447	5.79962	5.05603	3.6778	2.1819	0	6.15458	8.34061	5.88956	0	2.81047	4.87874	0
chr4_125334225_125334315_+	0	0	8	3	0	1	0	0	15	5	8	4	5	5	16	7	22	11	18	10	8	9	0	0	12	1	0	0	34.3043	6.20959	0	44.6449	0	0	43.631	26.2097	33.7958	23.1985	12.6401	18.389	34.9104	28.5857	45.1336	30.5822	35.3374	29.835	22.4837	43.9087	0
chr14_83449337_83449338_-	3	3	11	6	0	0	0	1	14	5	6	5	16	4	12	3	25	14	19	3	10	4	0	0	10	4	45.6621	14.0937	47.1684	12.4192	0	0	0	40.0016	40.7223	26.2097	25.3468	28.9981	40.4483	14.7112	26.1828	12.251	51.2882	38.9228	37.3005	8.95049	28.1047	19.515	0
chr17_15200642_15200690_+	8	7	30	24	2	0	0	1	28	23	18	23	38	31	19	13	43	22	51	37	37	31	4	0	26	10	121.766	32.8853	128.641	49.6767	48.3454	0	0	40.0016	81.4446	120.565	76.0405	133.391	96.0646	114.012	41.4561	53.0877	88.2156	61.1645	100.123	110.389	103.987	151.241	28.7894
chr3_41917332_41917403_+	0	1	7	1	2	0	0	1	20	4	19	3	29	4	53	5	39	11	60	11	34	7	0	0	12	1	0	4.6979	30.0163	2.06986	48.3454	0	0	40.0016	58.1747	20.9678	80.265	17.3989	73.3125	14.7112	115.641	20.4183	80.0095	30.5822	117.791	32.8185	95.5558	34.1512	0
chr9_10435576_10435594_-	3	1	25	18	6	0	0	1	24	6	19	6	41	13	40	9	35	9	55	15	31	11	0	0	16	2	45.6621	4.6979	107.201	37.2575	145.036	0	0	40.0016	69.8097	31.4517	80.265	34.7977	103.649	47.8113	87.276	36.753	71.8034	25.0218	107.975	44.7525	87.1244	53.6661	0
chr9_8572009_8572084_+	4	2	8	3	3	0	0	2	12	10	11	11	30	13	14	11	20	20	22	22	26	16	0	0	11	1	60.8828	9.3958	34.3043	6.20959	72.5181	0	0	80.0032	34.9048	52.4194	46.4692	63.7959	75.8405	47.8113	30.5466	44.9203	41.0305	55.6041	43.1901	65.637	73.0721	78.0598	0
chr3_59920483_59920567_-	4	3	14	6	1	0	0	0	26	2	9	2	23	4	21	5	26	5	42	4	20	7	2	0	20	2	60.8828	14.0937	60.0325	12.4192	24.1727	0	0	0	75.6271	10.4839	38.0202	11.5992	58.1444	14.7112	45.8199	20.4183	53.3397	13.901	82.4538	11.934	56.2093	34.1512	14.3947
chr20_11570441_11570469_-	3	0	13	7	0	0	0	0	7	4	7	2	16	1	14	1	11	8	14	4	12	4	1	0	6	2	45.6621	0	55.7445	14.489	0	0	0	0	20.3611	20.9678	29.5713	11.5992	40.4483	3.6778	30.5466	4.08367	22.5668	22.2416	27.4846	11.934	33.7256	19.515	7.19735
chr2_123432991_123433071_-	16	14	83	35	16	4	2	5	148	47	106	33	183	55	179	41	193	67	218	63	158	42	13	7	67	20	243.531	65.7706	355.907	72.4452	386.763	178.579	248.694	200.008	430.493	246.371	447.794	191.388	462.627	202.279	390.56	167.43	395.945	186.274	427.975	187.96	444.053	204.907	93.5656
chr10_46046144_46046201_+	4	3	15	14	1	0	0	0	27	10	14	13	24	12	13	5	25	13	24	17	23	4	0	0	22	8	60.8828	14.0937	64.3205	28.9781	24.1727	0	0	0	78.5359	52.4194	59.1426	75.3951	60.6724	44.1335	28.3647	20.4183	51.2882	36.1426	47.1165	50.7195	64.6407	19.515	0
chr18_74735259_74735264_+	8	12	56	45	17	2	10	5	106	21	76	16	93	28	116	30	118	34	116	29	96	42	0	0	41	10	121.766	56.3748	240.13	93.1438	410.936	89.2897	1243.47	200.008	308.326	110.081	321.06	92.794	235.106	102.978	253.1	122.51	242.08	94.5269	227.73	86.5214	269.805	204.907	0
chr8_48101990_48102037_+	9	6	3	1	0	0	0	0	2	12	2	14	2	12	2	20	3	29	4	27	2	14	1	0	2	17	136.986	28.1874	12.8641	2.06986	0	0	0	0	5.81747	62.9033	8.44894	81.1947	5.05603	44.1335	4.3638	81.6733	6.15458	80.6259	7.85275	80.5545	5.62093	68.3023	7.19735
chr3_18799278_18799314_+	1	0	6	1	0	0	0	0	10	2	2	0	6	3	6	1	10	1	14	6	8	2	0	0	3	1	15.2207	0	25.7282	2.06986	0	0	0	0	29.0874	10.4839	8.44894	0	15.1681	11.0334	13.0914	4.08367	20.5153	2.7802	27.4846	17.901	22.4837	9.75748	0
chr3_9007232_9007234_+	2	0	4	2	0	0	0	0	3	2	4	2	2	3	10	0	7	1	8	3	8	1	0	0	9	2	30.4414	0	17.1521	4.13972	0	0	0	0	8.72621	10.4839	16.8979	11.5992	5.05603	11.0334	21.819	0	14.3607	2.7802	15.7055	8.95049	22.4837	4.87874	0
chr10_85587069_85587115_-	10	13	4	2	22	38	3	21	75	134	78	149	104	171	107	140	117	203	119	156	99	171	0	0	34	33	152.207	61.0727	17.1521	4.13972	531.799	1696.5	373.042	840.034	218.155	702.42	329.509	864.144	262.914	628.903	233.463	571.713	240.029	564.381	233.619	465.426	278.236	834.264	0
chr1_207356601_207356603_+	2	0	7	4	0	0	0	0	7	5	1	5	7	9	8	5	12	9	9	8	5	9	1	0	9	5	30.4414	0	30.0163	8.27945	0	0	0	0	20.3611	26.2097	4.22447	28.9981	17.6961	33.1002	17.4552	20.4183	24.6183	25.0218	17.6687	23.868	14.0523	43.9087	7.19735
chr12_36286656_36286732_-	4	1	7	3	1	1	0	1	3	2	7	2	11	9	11	6	14	11	15	7	11	2	3	0	17	3	60.8828	4.6979	30.0163	6.20959	24.1727	44.6449	0	40.0016	8.72621	10.4839	29.5713	11.5992	27.8082	33.1002	24.0009	24.502	28.7214	30.5822	29.4478	20.8845	30.9151	9.75748	21.5921
chr14_49361411_49361454_+	2	0	7	2	4	2	0	3	19	2	13	5	23	7	24	3	37	12	28	8	15	4	0	0	2	3	30.4414	0	30.0163	4.13972	96.6908	89.2897	0	120.005	55.266	10.4839	54.9181	28.9981	58.1444	25.7446	52.3656	12.251	75.9065	33.3624	54.9692	23.868	42.157	19.515	0
chr4_160662632_160662724_-	10	11	7	1	0	1	0	4	8	30	12	13	1	32	7	17	9	49	7	47	2	28	1	0	6	16	152.207	51.6769	30.0163	2.06986	0	44.6449	0	160.006	23.2699	157.258	50.6937	75.3951	2.52802	117.689	15.2733	69.4223	18.4637	136.23	13.7423	140.224	5.62093	136.605	7.19735
chr8_112764860_112764902_+	5	4	5	1	1	5	0	0	1	22	2	26	1	31	1	20	2	44	3	52	1	26	0	1	2	15	76.1035	18.7916	21.4402	2.06986	24.1727	223.224	0	0	2.90874	115.323	8.44894	150.79	2.52802	114.012	2.1819	81.6733	4.10305	122.329	5.88956	155.142	2.81047	126.847	0
chr4_87725529_87725587_+	3	3	24	12	2	2	0	0	22	11	28	8	43	15	40	10	34	12	49	25	36	6	1	0	10	2	45.6621	14.0937	102.913	24.8383	48.3454	89.2897	0	0	63.9922	57.6614	118.285	46.397	108.705	55.1669	87.276	40.8367	69.7519	33.3624	96.1961	74.5875	101.177	29.2724	7.19735
chr4_125875680_125875709_+	4	4	11	7	4	0	0	0	8	8	17	17	14	21	30	17	23	19	28	37	21	21	0	0	13	5	60.8828	18.7916	47.1684	14.489	96.6908	0	0	0	23.2699	41.9355	71.816	98.5936	35.3922	77.2337	65.457	69.4223	47.1851	52.8239	54.9692	110.389	59.0198	102.454	0
chr1_158872518_158872520_+	2	0	4	0	0	0	0	0	0	0	2	1	3	1	4	4	3	2	6	1	2	2	0	0	2	1	30.4414	0	17.1521	0	0	0	0	0	0	0	8.44894	5.79962	7.58405	3.6778	8.7276	16.3347	6.15458	5.56041	11.7791	2.9835	5.62093	9.75748	0
chr4_143859632_143859633_+	12	9	30	22	5	1	1	7	19	36	13	26	34	35	30	25	30	45	40	35	39	38	9	1	28	20	182.648	42.2811	128.641	45.537	120.863	44.6449	124.347	280.011	55.266	188.71	54.9181	150.79	85.9526	128.723	65.457	102.092	61.5458	125.109	78.5275	104.422	109.608	185.392	64.7762
chr4_149665105_149665108_-	7	7	5	3	0	5	0	3	1	24	2	13	6	31	2	21	8	39	8	33	3	21	0	0	8	12	106.545	32.8853	21.4402	6.20959	0	223.224	0	120.005	2.90874	125.807	8.44894	75.3951	15.1681	114.012	4.3638	85.757	16.4122	108.428	15.7055	98.4554	8.4314	102.454	0
chr7_129062132_129062199_-	0	1	16	6	4	0	0	0	37	1	28	4	40	3	53	6	40	4	77	3	36	5	0	0	8	4	0	4.6979	68.6086	12.4192	96.6908	0	0	0	107.623	5.24194	118.285	23.1985	101.121	11.0334	115.641	24.502	82.061	11.1208	151.165	8.95049	101.177	24.3937	0
chr19_41680759_41680800_-	1	1	11	2	0	0	0	1	6	3	10	3	12	2	6	3	12	2	16	3	7	0	0	0	7	0	15.2207	4.6979	47.1684	4.13972	0	0	0	40.0016	17.4524	15.7258	42.2447	17.3989	30.3362	7.35559	13.0914	12.251	24.6183	5.56041	31.411	8.95049	19.6733	0	0
chr5_22047329_22047351_-	2	0	16	4	2	1	0	0	6	2	7	2	16	5	25	2	14	3	14	8	10	5	2	0	5	2	30.4414	0	68.6086	8.27945	48.3454	44.6449	0	0	17.4524	10.4839	29.5713	11.5992	40.4483	18.389	54.5475	8.16733	28.7214	8.34061	27.4846	23.868	28.1047	24.3937	14.3947
chr10_14429967_14430021_+	4	1	23	26	6	1	0	2	50	9	47	13	72	14	85	27	83	19	89	29	68	17	0	0	33	4	60.8828	4.6979	98.6248	53.8164	145.036	44.6449	0	80.0032	145.437	47.1775	198.55	75.3951	182.017	51.4891	185.462	110.259	170.277	52.8239	174.724	86.5214	191.112	82.9386	0
chr15_47703345_47703351_-	1	1	1	0	6	2	4	4	41	4	46	5	55	7	70	4	61	14	62	7	68	8	0	0	26	2	15.2207	4.6979	4.28804	0	145.036	89.2897	497.389	160.006	119.258	20.9678	194.326	28.9981	139.041	25.7446	152.733	16.3347	125.143	38.9228	121.718	20.8845	191.112	39.0299	0
chr4_161252103_161252165_+	1	3	25	16	3	3	0	0	72	11	50	11	70	16	82	15	72	7	97	21	70	7	1	0	31	5	15.2207	14.0937	107.201	33.1178	72.5181	133.935	0	0	209.429	57.6614	211.224	63.7959	176.961	58.8447	178.916	61.255	147.71	19.4614	190.429	62.6535	196.733	34.1512	7.19735
chr7_12951481_12951482_-	1	0	6	0	0	0	0	1	5	2	8	5	5	9	15	2	8	3	11	6	12	5	0	0	2	1	15.2207	0	25.7282	0	0	0	0	40.0016	14.5437	10.4839	33.7958	28.9981	12.6401	33.1002	32.7285	8.16733	16.4122	8.34061	21.595	17.901	33.7256	24.3937	0
chr12_7272232_7272309_-	0	0	7	1	1	0	0	0	6	2	4	2	6	0	5	4	7	3	2	1	5	2	0	0	5	2	0	0	30.0163	2.06986	24.1727	0	0	0	17.4524	10.4839	16.8979	11.5992	15.1681	0	10.9095	16.3347	14.3607	8.34061	3.92637	2.9835	14.0523	9.75748	0
chr4_152388387_152388475_+	2	6	36	13	3	0	0	0	28	7	13	7	26	11	27	5	30	17	36	18	33	8	0	1	21	6	30.4414	28.1874	154.369	26.9082	72.5181	0	0	0	81.4446	36.6936	54.9181	40.5974	65.7284	40.4558	58.9113	20.4183	61.5458	47.2634	70.6747	53.703	92.7453	39.0299	0
chr4_182674166_182674259_-	2	2	32	20	4	1	0	1	72	20	45	11	70	18	89	22	86	27	73	24	53	17	4	1	44	4	30.4414	9.3958	137.217	41.3972	96.6908	44.6449	0	40.0016	209.429	104.839	190.101	63.7959	176.961	66.2003	194.189	89.8407	176.431	75.0655	143.313	71.604	148.955	82.9386	28.7894
chr3_52789313_52789354_+	12	17	53	44	13	2	4	9	113	31	106	31	142	48	139	42	152	48	151	58	122	46	6	1	56	20	182.648	79.8643	227.266	91.0739	314.245	89.2897	497.389	360.014	328.687	162.5	447.794	179.788	358.978	176.534	303.284	171.514	311.832	133.45	296.441	173.043	342.877	224.422	43.1841
chr11_80709743_80709800_+	1	0	8	3	0	0	0	0	11	2	5	0	12	2	11	3	14	1	12	3	6	3	1	0	8	3	15.2207	0	34.3043	6.20959	0	0	0	0	31.9961	10.4839	21.1224	0	30.3362	7.35559	24.0009	12.251	28.7214	2.7802	23.5582	8.95049	16.8628	14.6362	7.19735
chr12_28739923_28739968_-	8	11	48	45	8	2	2	3	112	22	65	14	111	28	133	43	145	38	133	34	123	32	1	0	55	10	121.766	51.6769	205.826	93.1438	193.382	89.2897	248.694	120.005	325.778	115.323	274.591	81.1947	280.61	102.978	290.193	175.598	297.471	105.648	261.104	101.439	345.687	156.12	7.19735
chr1_95071238_95071241_+	10	5	7	9	2	1	0	4	5	10	6	15	6	28	5	16	10	22	8	22	4	19	1	0	12	11	152.207	23.4895	30.0163	18.6288	48.3454	44.6449	0	160.006	14.5437	52.4194	25.3468	86.9943	15.1681	102.978	10.9095	65.3387	20.5153	61.1645	15.7055	65.637	11.2419	92.696	7.19735
chr6_136455081_136455120_-	43	68	229	152	68	14	28	31	318	113	352	89	373	140	418	121	402	148	449	155	406	120	1	0	277	74	654.49	319.457	981.96	314.619	1643.74	625.028	3481.72	1240.05	924.978	592.339	1487.01	516.166	942.95	514.891	912.034	494.124	824.714	411.47	881.471	462.442	1141.05	585.449	7.19735
chr10_55569971_55570031_+	5	6	15	11	0	0	0	0	20	20	12	9	15	12	16	18	13	21	28	24	18	12	1	0	16	12	76.1035	28.1874	64.3205	22.7685	0	0	0	0	58.1747	104.839	50.6937	52.1966	37.9203	44.1335	34.9104	73.506	26.6698	58.3843	54.9692	71.604	50.5884	58.5449	7.19735
chr9_90338002_90338065_+	1	0	12	3	2	0	0	0	13	8	4	1	26	7	13	0	11	8	16	16	14	6	2	1	10	4	15.2207	0	51.4564	6.20959	48.3454	0	0	0	37.8136	41.9355	16.8979	5.79962	65.7284	25.7446	28.3647	0	22.5668	22.2416	31.411	47.736	39.3465	29.2724	14.3947
chr9_36310934_36311024_+	6	11	22	4	2	1	0	0	12	19	6	14	21	14	20	22	24	26	23	29	13	18	3	0	15	14	91.3242	51.6769	94.3368	8.27945	48.3454	44.6449	0	0	34.9048	99.5969	25.3468	81.1947	53.0884	51.4891	43.638	89.8407	49.2366	72.2853	45.1533	86.5214	36.536	87.8173	21.5921
chr5_160700753_160700840_-	9	6	7	6	1	2	2	4	14	19	12	20	18	32	25	24	18	37	24	41	16	38	0	0	14	6	136.986	28.1874	30.0163	12.4192	24.1727	89.2897	248.694	160.006	40.7223	99.5969	50.6937	115.992	45.5043	117.689	54.5475	98.008	36.9275	102.868	47.1165	122.323	44.9674	185.392	0
chr1_94797831_94797909_+	3	4	5	4	0	1	2	7	7	24	5	16	16	29	11	24	12	33	11	38	8	25	1	2	17	24	45.6621	18.7916	21.4402	8.27945	0	44.6449	248.694	280.011	20.3611	125.807	21.1224	92.794	40.4483	106.656	24.0009	98.008	24.6183	91.7467	21.595	113.373	22.4837	121.968	7.19735
chr7_37783202_37783245_+	1	0	10	1	4	0	1	2	13	3	5	3	10	16	11	3	15	7	18	10	5	4	0	1	3	3	15.2207	0	42.8804	2.06986	96.6908	0	124.347	80.0032	37.8136	15.7258	21.1224	17.3989	25.2802	58.8447	24.0009	12.251	30.7729	19.4614	35.3374	29.835	14.0523	19.515	0
chr4_796254_796255_-	1	1	3	1	2	1	0	1	21	6	18	7	25	3	20	6	28	8	27	7	24	5	0	0	15	3	15.2207	4.6979	12.8641	2.06986	48.3454	44.6449	0	40.0016	61.0834	31.4517	76.0405	40.5974	63.2004	11.0334	43.638	24.502	57.4427	22.2416	53.006	20.8845	67.4512	24.3937	0
chr4_152380821_152380920_+	5	6	48	21	3	1	1	2	46	23	33	9	58	22	38	9	64	28	93	29	58	23	2	3	56	5	76.1035	28.1874	205.826	43.4671	72.5181	44.6449	124.347	80.0032	133.802	120.565	139.408	52.1966	146.625	80.9115	82.9122	36.753	131.298	77.8457	182.576	86.5214	163.007	112.211	14.3947
chr10_63390382_63390479_-	0	1	10	5	0	2	0	0	10	2	8	1	8	5	12	3	14	3	17	5	5	3	0	0	20	2	0	4.6979	42.8804	10.3493	0	89.2897	0	0	29.0874	10.4839	33.7958	5.79962	20.2241	18.389	26.1828	12.251	28.7214	8.34061	33.3742	14.9175	14.0523	14.6362	0
chr16_62351611_62351704_-	8	5	54	32	5	1	0	1	45	13	50	21	68	28	80	17	72	32	120	49	70	23	3	4	32	8	121.766	23.4895	231.554	66.2356	120.863	44.6449	0	40.0016	130.893	68.1452	211.224	121.792	171.905	102.978	174.552	69.4223	147.71	88.9665	235.582	146.191	196.733	112.211	21.5921
chr4_149727048_149727050_-	13	14	5	3	1	1	0	8	10	32	5	33	9	44	10	40	8	50	15	53	5	49	0	1	7	26	197.869	65.7706	21.4402	6.20959	24.1727	44.6449	0	320.013	29.0874	167.742	21.1224	191.388	22.7522	161.823	21.819	163.347	16.4122	139.01	29.4478	158.125	14.0523	239.058	0
chr17_52552496_52552563_-	15	28	60	29	13	4	0	11	68	44	52	55	105	58	115	89	99	76	153	152	104	62	4	2	34	22	228.311	131.541	257.282	60.026	314.245	178.579	0	440.018	197.794	230.645	219.673	318.979	265.442	213.312	250.919	363.446	203.101	211.295	300.368	453.492	292.288	302.482	28.7894
chr4_104812552_104812572_+	0	1	11	2	1	1	1	0	18	6	9	1	17	5	18	3	15	4	18	8	21	3	0	0	6	2	0	4.6979	47.1684	4.13972	24.1727	44.6449	124.347	0	52.3572	31.4517	38.0202	5.79962	42.9763	18.389	39.2742	12.251	30.7729	11.1208	35.3374	23.868	59.0198	14.6362	0
chr15_18737708_18737784_+	22	42	110	71	16	7	3	4	167	63	136	68	177	79	192	65	191	73	278	108	189	66	3	0	104	33	334.855	197.312	471.684	146.96	386.763	312.514	373.042	160.006	485.759	330.242	574.528	394.374	447.459	290.546	418.925	265.438	391.841	202.955	545.766	322.218	531.178	321.997	21.5921
chr8_85379403_85379404_-	0	0	2	0	1	0	0	0	16	2	5	3	13	11	11	4	14	5	20	9	9	3	0	0	7	5	0	0	8.57607	0	24.1727	0	0	0	46.5398	10.4839	21.1224	17.3989	32.8642	40.4558	24.0009	16.3347	28.7214	13.901	39.2637	26.8515	25.2942	14.6362	0
chr12_21859757_21859759_+	4	3	13	13	13	0	2	2	41	13	48	7	40	11	84	13	55	13	61	7	49	11	0	0	43	4	60.8828	14.0937	55.7445	26.9082	314.245	0	248.694	80.0032	119.258	68.1452	202.775	40.5974	101.121	40.4558	183.28	53.0877	112.834	36.1426	119.754	20.8845	137.713	53.6661	0
chr10_63384689_63384700_-	2	0	2	0	0	0	0	0	3	4	2	1	6	2	4	0	6	5	4	4	1	2	0	0	4	2	30.4414	0	8.57607	0	0	0	0	0	8.72621	20.9678	8.44894	5.79962	15.1681	7.35559	8.7276	0	12.3092	13.901	7.85275	11.934	2.81047	9.75748	0
chr1_99814629_99814727_+	7	2	2	0	0	2	0	0	3	16	4	4	5	21	2	10	1	31	5	19	2	8	1	0	3	5	106.545	9.3958	8.57607	0	0	89.2897	0	0	8.72621	83.8711	16.8979	23.1985	12.6401	77.2337	4.3638	40.8367	2.05153	86.1863	9.81593	56.6865	5.62093	39.0299	7.19735
chr1_212752593_212752651_-	3	0	1	0	0	0	0	0	3	9	0	3	0	17	3	8	1	11	2	12	2	12	0	0	0	9	45.6621	0	4.28804	0	0	0	0	0	8.72621	47.1775	0	17.3989	0	62.5225	6.5457	32.6693	2.05153	30.5822	3.92637	35.802	5.62093	58.5449	0
chr5_35477288_35477336_-	3	2	7	2	2	1	0	0	11	16	6	10	11	11	11	9	6	18	16	20	16	13	2	0	11	4	45.6621	9.3958	30.0163	4.13972	48.3454	44.6449	0	0	31.9961	83.8711	25.3468	57.9962	27.8082	40.4558	24.0009	36.753	12.3092	50.0436	31.411	59.67	44.9674	63.4236	14.3947
chr7_120290251_120290252_+	1	0	4	0	1	0	1	0	5	3	9	1	9	4	12	2	7	3	11	1	8	2	0	0	4	1	15.2207	0	17.1521	0	24.1727	0	124.347	0	14.5437	15.7258	38.0202	5.79962	22.7522	14.7112	26.1828	8.16733	14.3607	8.34061	21.595	2.9835	22.4837	9.75748	0
chr1_95071794_95071795_+	9	2	3	2	2	0	0	0	3	6	3	2	3	10	3	8	4	12	6	15	1	5	1	0	3	5	136.986	9.3958	12.8641	4.13972	48.3454	0	0	0	8.72621	31.4517	12.6734	11.5992	7.58405	36.778	6.5457	32.6693	8.2061	33.3624	11.7791	44.7525	2.81047	24.3937	7.19735
chr5_169536475_169536479_+	12	6	9	5	0	2	0	7	2	9	2	19	6	25	2	22	5	23	7	24	4	20	0	1	1	10	182.648	28.1874	38.5923	10.3493	0	89.2897	0	280.011	5.81747	47.1775	8.44894	110.193	15.1681	91.9449	4.3638	89.8407	10.2576	63.9447	13.7423	71.604	11.2419	97.5748	0
chr14_105002611_105002700_+	0	0	5	2	0	0	1	0	14	1	12	0	20	1	17	2	24	3	18	1	11	3	0	0	12	2	0	0	21.4402	4.13972	0	0	124.347	0	40.7223	5.24194	50.6937	0	50.5603	3.6778	37.0923	8.16733	49.2366	8.34061	35.3374	2.9835	30.9151	14.6362	0
chr15_36866861_36866944_+	3	6	46	28	6	1	1	3	89	13	55	13	97	15	102	21	103	28	122	24	106	16	4	0	38	7	45.6621	28.1874	197.25	57.9561	145.036	44.6449	124.347	120.005	258.877	68.1452	232.346	75.3951	245.218	55.1669	222.554	85.757	211.307	77.8457	239.509	71.604	297.909	78.0598	28.7894
chr3_13783636_13783646_+	30	47	57	49	19	12	6	15	82	111	103	123	101	148	105	129	112	169	120	169	108	146	3	0	58	48	456.621	220.801	244.418	101.423	459.281	535.738	746.083	600.024	238.516	581.856	435.121	713.354	255.33	544.314	229.1	526.793	229.771	469.854	235.582	504.211	303.53	712.296	21.5921
chr1_249607923_249607951_+	21	27	112	113	41	14	12	26	154	51	135	50	179	54	234	101	231	80	208	84	199	74	1	0	86	24	319.635	126.843	480.26	233.894	991.08	625.028	1492.17	1040.04	447.945	267.339	570.304	289.981	452.515	198.601	510.565	412.45	473.903	222.416	408.343	250.614	559.283	361.027	7.19735
chr10_89872923_89873011_-	1	1	11	7	7	1	1	1	40	8	38	16	43	14	68	24	64	17	61	18	50	16	0	0	15	3	15.2207	4.6979	47.1684	14.489	169.209	44.6449	124.347	40.0016	116.349	41.9355	160.53	92.794	108.705	51.4891	148.369	98.008	131.298	47.2634	119.754	53.703	140.523	78.0598	0
chr15_59787644_59787720_-	0	0	7	0	0	1	0	0	7	3	6	2	6	3	7	3	11	0	11	5	7	3	1	0	7	2	0	0	30.0163	0	0	44.6449	0	0	20.3611	15.7258	25.3468	11.5992	15.1681	11.0334	15.2733	12.251	22.5668	0	21.595	14.9175	19.6733	14.6362	7.19735
chr2_12119221_12119235_+	38	25	185	85	40	7	9	14	227	59	140	55	261	86	202	55	237	97	259	91	242	86	27	3	107	21	578.387	117.448	793.287	175.938	966.908	312.514	1119.12	560.022	660.283	309.275	591.426	318.979	659.812	316.29	440.744	224.602	486.212	269.68	508.465	271.498	680.133	419.572	194.328
chr3_147081200_147081201_+	1	0	2	0	0	0	0	0	3	1	2	0	1	2	0	0	2	1	4	1	2	2	0	0	5	3	15.2207	0	8.57607	0	0	0	0	0	8.72621	5.24194	8.44894	0	2.52802	7.35559	0	0	4.10305	2.7802	7.85275	2.9835	5.62093	9.75748	0
chr1_201559653_201559677_+	1	1	10	4	0	0	0	0	5	4	3	3	7	1	5	2	9	2	8	5	6	4	0	0	9	2	15.2207	4.6979	42.8804	8.27945	0	0	0	0	14.5437	20.9678	12.6734	17.3989	17.6961	3.6778	10.9095	8.16733	18.4637	5.56041	15.7055	14.9175	16.8628	19.515	0
chr1_148929258_148929260_+	0	0	9	3	0	0	0	0	5	1	2	0	0	2	5	4	3	3	6	3	4	2	0	0	8	1	0	0	38.5923	6.20959	0	0	0	0	14.5437	5.24194	8.44894	0	0	7.35559	10.9095	16.3347	6.15458	8.34061	11.7791	8.95049	11.2419	9.75748	0
chr12_43295193_43295286_-	1	2	7	4	1	0	0	0	6	3	4	3	10	6	5	4	8	10	7	3	8	5	0	0	11	8	15.2207	9.3958	30.0163	8.27945	24.1727	0	0	0	17.4524	15.7258	16.8979	17.3989	25.2802	22.0668	10.9095	16.3347	16.4122	27.802	13.7423	8.95049	22.4837	24.3937	0
chr9_110318006_110318043_+	2	0	6	1	0	0	0	0	5	1	1	1	4	2	3	2	10	5	12	3	8	0	0	0	5	0	30.4414	0	25.7282	2.06986	0	0	0	0	14.5437	5.24194	4.22447	5.79962	10.1121	7.35559	6.5457	8.16733	20.5153	13.901	23.5582	8.95049	22.4837	0	0
chr3_9011868_9011962_+	8	16	104	50	5	4	2	1	81	33	73	20	96	46	67	20	115	52	119	53	94	28	11	0	113	16	121.766	75.1664	445.956	103.493	120.863	178.579	248.694	40.0016	235.608	172.984	308.386	115.992	242.69	169.179	146.187	81.6733	235.926	144.571	233.619	158.125	264.184	136.605	79.1709
chr2_77350636_77350714_+	6	9	27	21	4	0	0	4	45	39	39	29	50	44	18	21	53	53	81	44	41	27	2	0	27	15	91.3242	42.2811	115.777	43.4671	96.6908	0	0	160.006	130.893	204.436	164.754	168.189	126.401	161.823	39.2742	85.757	108.731	147.351	159.018	131.274	115.229	131.726	14.3947
chr14_85595716_85595718_-	16	19	44	36	2	1	0	0	14	17	18	19	24	15	12	16	22	18	41	27	28	15	6	3	37	23	243.531	89.2601	188.674	74.515	48.3454	44.6449	0	0	40.7223	89.113	76.0405	110.193	60.6724	55.1669	26.1828	65.3387	45.1336	50.0436	80.4906	80.5545	78.693	73.1811	43.1841
chr8_47725324_47725373_-	2	7	27	5	12	6	6	1	201	13	154	10	160	21	323	40	357	39	281	26	195	21	1	0	94	6	30.4414	32.8853	115.777	10.3493	290.072	267.869	746.083	40.0016	584.656	68.1452	650.569	57.9962	404.483	77.2337	704.754	163.347	732.395	108.428	551.655	77.571	548.041	102.454	7.19735
chr7_67223858_67223917_+	2	0	4	3	1	3	0	1	39	3	23	4	23	4	45	6	30	4	36	4	36	3	0	1	15	4	30.4414	0	17.1521	6.20959	24.1727	133.935	0	40.0016	113.441	15.7258	97.1628	23.1985	58.1444	14.7112	98.1855	24.502	61.5458	11.1208	70.6747	11.934	101.177	14.6362	0
chr1_94833130_94833133_+	7	6	7	7	0	2	0	4	2	7	4	5	2	3	3	11	3	13	10	14	2	3	0	0	10	14	106.545	28.1874	30.0163	14.489	0	89.2897	0	160.006	5.81747	36.6936	16.8979	28.9981	5.05603	11.0334	6.5457	44.9203	6.15458	36.1426	19.6319	41.769	5.62093	14.6362	0
chr9_74521982_74522038_+	1	3	9	1	0	0	0	0	9	2	7	4	6	2	8	2	10	3	11	9	3	0	1	1	18	5	15.2207	14.0937	38.5923	2.06986	0	0	0	0	26.1786	10.4839	29.5713	23.1985	15.1681	7.35559	17.4552	8.16733	20.5153	8.34061	21.595	26.8515	8.4314	0	7.19735
chr5_128965219_128965257_+	27	29	17	11	0	3	1	0	6	57	3	44	11	113	7	79	12	119	13	158	6	73	4	7	12	66	410.959	136.239	72.8966	22.7685	0	133.935	124.347	0	17.4524	298.791	12.6734	255.183	27.8082	415.591	15.2733	322.61	24.6183	330.844	25.5214	471.393	16.8628	356.148	28.7894
chr1_84314964_84315028_-	12	35	92	23	26	7	4	6	145	60	153	57	173	72	207	80	177	84	242	156	186	73	2	0	74	19	182.648	164.427	394.499	47.6068	628.49	312.514	497.389	240.01	421.767	314.517	646.344	330.579	437.347	264.801	451.653	326.693	363.12	233.537	475.091	465.426	522.746	356.148	14.3947
chr4_121982428_121982493_-	1	0	5	2	1	0	0	1	3	3	6	2	6	7	7	5	4	11	3	6	5	6	0	1	8	6	15.2207	0	21.4402	4.13972	24.1727	0	0	40.0016	8.72621	15.7258	25.3468	11.5992	15.1681	25.7446	15.2733	20.4183	8.2061	30.5822	5.88956	17.901	14.0523	29.2724	0
chr1_64157992_64157993_-	1	0	3	0	0	0	0	0	3	3	3	2	2	3	3	2	3	6	4	3	3	2	0	0	3	3	15.2207	0	12.8641	0	0	0	0	0	8.72621	15.7258	12.6734	11.5992	5.05603	11.0334	6.5457	8.16733	6.15458	16.6812	7.85275	8.95049	8.4314	9.75748	0
chr2_197225096_197225122_+	7	0	1	0	1	0	0	0	0	5	5	6	1	4	0	2	1	6	0	3	1	3	0	0	0	3	106.545	0	4.28804	0	24.1727	0	0	0	0	26.2097	21.1224	34.7977	2.52802	14.7112	0	8.16733	2.05153	16.6812	0	8.95049	2.81047	14.6362	0
chr18_28922780_28922781_+	1	0	3	1	2	0	0	1	6	2	5	4	9	4	7	4	8	1	7	1	4	4	0	0	11	1	15.2207	0	12.8641	2.06986	48.3454	0	0	40.0016	17.4524	10.4839	21.1224	23.1985	22.7522	14.7112	15.2733	16.3347	16.4122	2.7802	13.7423	2.9835	11.2419	19.515	0
chr3_106265011_106265079_+	0	0	9	3	0	0	0	1	7	9	10	3	19	9	12	4	18	12	22	10	15	6	0	2	14	7	0	0	38.5923	6.20959	0	0	0	40.0016	20.3611	47.1775	42.2447	17.3989	48.0323	33.1002	26.1828	16.3347	36.9275	33.3624	43.1901	29.835	42.157	29.2724	0
chr10_53168165_53168167_-	4	1	1	0	0	0	0	0	2	11	1	7	0	10	4	6	1	15	1	10	1	5	0	0	1	7	60.8828	4.6979	4.28804	0	0	0	0	0	5.81747	57.6614	4.22447	40.5974	0	36.778	8.7276	24.502	2.05153	41.703	1.96319	29.835	2.81047	24.3937	0
chr18_32193030_32193106_+	3	2	16	12	2	0	0	0	18	21	19	8	26	12	22	14	30	20	35	24	15	14	4	0	23	8	45.6621	9.3958	68.6086	24.8383	48.3454	0	0	0	52.3572	110.081	80.265	46.397	65.7284	44.1335	48.0018	57.1713	61.5458	55.6041	68.7115	71.604	42.157	68.3023	28.7894
chr3_34192867_34192920_-	7	2	19	22	0	0	0	0	17	4	7	4	10	11	18	10	16	7	15	13	14	4	2	1	21	10	106.545	9.3958	81.4727	45.537	0	0	0	0	49.4485	20.9678	29.5713	23.1985	25.2802	40.4558	39.2742	40.8367	32.8244	19.4614	29.4478	38.7855	39.3465	19.515	14.3947
chr7_26969511_26969578_+	5	12	92	25	14	1	1	4	159	35	108	16	162	43	212	31	213	53	248	64	173	38	16	5	90	29	76.1035	56.3748	394.499	51.7465	338.418	44.6449	124.347	160.006	462.489	183.468	456.243	92.794	409.539	158.145	462.563	126.594	436.975	147.351	486.87	190.944	486.21	185.392	115.158
chr4_151171799_151171830_-	0	0	2	0	2	0	1	0	3	1	8	0	5	3	10	6	15	2	12	2	10	0	0	0	11	2	0	0	8.57607	0	48.3454	0	124.347	0	8.72621	5.24194	33.7958	0	12.6401	11.0334	21.819	24.502	30.7729	5.56041	23.5582	5.967	28.1047	0	0
chr8_66580960_66581024_-	6	4	20	23	0	0	0	2	13	9	8	11	17	22	35	24	22	23	29	23	16	18	2	0	24	14	91.3242	18.7916	85.7607	47.6068	0	0	0	80.0032	37.8136	47.1775	33.7958	63.7959	42.9763	80.9115	76.3665	98.008	45.1336	63.9447	56.9324	68.6205	44.9674	87.8173	14.3947
chr13_68764420_68764424_+	14	10	36	33	3	2	0	2	23	17	18	15	29	13	28	18	37	19	44	24	40	12	9	1	30	21	213.09	46.979	154.369	68.3054	72.5181	89.2897	0	80.0032	66.9009	89.113	76.0405	86.9943	73.3125	47.8113	61.0932	73.506	75.9065	52.8239	86.3802	71.604	112.419	58.5449	64.7762
chrX_26816150_26816235_-	2	3	16	11	6	3	1	1	19	10	17	3	26	10	69	21	42	15	33	15	25	9	0	0	24	5	30.4414	14.0937	68.6086	22.7685	145.036	133.935	124.347	40.0016	55.266	52.4194	71.816	17.3989	65.7284	36.778	150.551	85.757	86.1641	41.703	64.7851	44.7525	70.2616	43.9087	0
chr1_265455398_265455453_-	0	0	10	2	0	0	0	0	3	0	6	3	5	1	5	0	11	0	10	4	9	0	1	0	8	1	0	0	42.8804	4.13972	0	0	0	0	8.72621	0	25.3468	17.3989	12.6401	3.6778	10.9095	0	22.5668	0	19.6319	11.934	25.2942	0	7.19735
chr7_12393459_12393460_-	5	0	3	2	1	0	0	2	2	14	1	5	6	9	2	3	1	9	3	7	2	16	0	1	2	9	76.1035	0	12.8641	4.13972	24.1727	0	0	80.0032	5.81747	73.3872	4.22447	28.9981	15.1681	33.1002	4.3638	12.251	2.05153	25.0218	5.88956	20.8845	5.62093	78.0598	0
chr10_63130960_63131009_-	2	2	7	4	1	0	0	1	9	6	13	6	18	8	18	4	15	10	10	7	15	5	0	0	15	3	30.4414	9.3958	30.0163	8.27945	24.1727	0	0	40.0016	26.1786	31.4517	54.9181	34.7977	45.5043	29.4224	39.2742	16.3347	30.7729	27.802	19.6319	20.8845	42.157	24.3937	0
chr12_11172489_11172494_-	2	2	6	4	3	0	0	0	7	8	13	2	7	8	8	3	8	11	18	8	11	7	1	0	12	7	30.4414	9.3958	25.7282	8.27945	72.5181	0	0	0	20.3611	41.9355	54.9181	11.5992	17.6961	29.4224	17.4552	12.251	16.4122	30.5822	35.3374	23.868	30.9151	34.1512	7.19735
chr1_94794855_94794857_+	1	0	2	0	1	0	0	0	2	1	0	2	2	5	3	2	3	8	1	5	1	3	0	0	3	5	15.2207	0	8.57607	0	24.1727	0	0	0	5.81747	5.24194	0	11.5992	5.05603	18.389	6.5457	8.16733	6.15458	22.2416	1.96319	14.9175	2.81047	14.6362	0
chr3_133160898_133160975_+	12	16	70	75	23	4	1	11	171	49	112	45	198	66	221	58	234	92	235	119	180	75	1	0	84	19	182.648	75.1664	300.163	155.24	555.972	178.579	124.347	440.018	497.394	256.855	473.141	260.983	500.547	242.735	482.2	236.853	480.057	255.779	461.349	355.036	505.884	365.905	7.19735
chr10_57488699_57488763_+	5	7	11	5	3	2	0	2	12	8	13	13	10	14	14	14	13	14	10	20	10	10	2	1	15	12	76.1035	32.8853	47.1684	10.3493	72.5181	89.2897	0	80.0032	34.9048	41.9355	54.9181	75.3951	25.2802	51.4891	30.5466	57.1713	26.6698	38.9228	19.6319	59.67	28.1047	48.7874	14.3947
chr15_59764576_59764650_-	2	0	5	2	0	0	0	0	12	4	3	0	8	7	5	3	11	4	13	6	8	3	0	0	5	2	30.4414	0	21.4402	4.13972	0	0	0	0	34.9048	20.9678	12.6734	0	20.2241	25.7446	10.9095	12.251	22.5668	11.1208	25.5214	17.901	22.4837	14.6362	0
chr6_110035061_110035073_+	7	7	14	14	6	1	0	3	27	15	22	18	42	35	27	13	37	31	40	29	22	18	3	0	29	12	106.545	32.8853	60.0325	28.9781	145.036	44.6449	0	120.005	78.5359	78.6291	92.9384	104.393	106.177	128.723	58.9113	53.0877	75.9065	86.1863	78.5275	86.5214	61.8302	87.8173	21.5921
chr9_87048646_87048691_-	3	2	10	2	1	1	0	1	10	8	7	4	19	10	12	4	13	13	16	10	7	7	0	0	1	2	45.6621	9.3958	42.8804	4.13972	24.1727	44.6449	0	40.0016	29.0874	41.9355	29.5713	23.1985	48.0323	36.778	26.1828	16.3347	26.6698	36.1426	31.411	29.835	19.6733	34.1512	0
chr1_207335403_207335404_+	1	0	2	0	0	0	0	0	2	6	1	5	6	7	4	1	6	4	1	8	5	5	0	0	4	3	15.2207	0	8.57607	0	0	0	0	0	5.81747	31.4517	4.22447	28.9981	15.1681	25.7446	8.7276	4.08367	12.3092	11.1208	1.96319	23.868	14.0523	24.3937	0
chr1_208695016_208695089_+	2	0	21	19	6	1	1	1	36	4	25	2	32	7	27	9	33	6	38	7	39	4	2	0	23	6	30.4414	0	90.0488	39.3274	145.036	44.6449	124.347	40.0016	104.714	20.9678	105.612	11.5992	80.8965	25.7446	58.9113	36.753	67.7004	16.6812	74.6011	20.8845	109.608	19.515	14.3947
chr1_212788889_212788932_-	9	1	4	0	0	0	1	0	4	4	4	4	6	9	11	5	14	10	17	10	11	7	1	0	8	0	136.986	4.6979	17.1521	0	0	0	124.347	0	11.6349	20.9678	16.8979	23.1985	15.1681	33.1002	24.0009	20.4183	28.7214	27.802	33.3742	29.835	30.9151	34.1512	7.19735
chr4_182651552_182651613_-	6	13	37	21	4	0	1	5	101	56	56	45	97	92	83	49	98	72	114	74	66	42	8	6	70	32	91.3242	61.0727	158.657	43.4671	96.6908	0	124.347	200.008	293.782	293.549	236.57	260.983	245.218	338.357	181.098	200.1	201.05	200.175	223.803	220.779	185.491	204.907	57.5788
chr12_1538020_1538079_-	1	1	4	1	1	0	0	1	10	1	8	4	6	1	13	6	15	8	8	8	19	8	0	0	10	2	15.2207	4.6979	17.1521	2.06986	24.1727	0	0	40.0016	29.0874	5.24194	33.7958	23.1985	15.1681	3.6778	28.3647	24.502	30.7729	22.2416	15.7055	23.868	53.3988	39.0299	0
chr3_148275924_148275999_-	0	4	8	3	13	4	1	4	56	51	54	54	76	84	72	74	63	94	91	116	70	81	0	0	24	15	0	18.7916	34.3043	6.20959	314.245	178.579	124.347	160.006	162.889	267.339	228.121	313.18	192.129	308.935	157.097	302.191	129.246	261.339	178.65	346.086	196.733	395.178	0
chr4_143876879_143876880_+	12	13	14	10	0	1	0	3	23	29	10	22	28	32	15	23	20	37	23	44	24	29	1	7	28	27	182.648	61.0727	60.0325	20.6986	0	44.6449	0	120.005	66.9009	152.016	42.2447	127.592	70.7845	117.689	32.7285	93.9243	41.0305	102.868	45.1533	131.274	67.4512	141.483	7.19735
chr4_146790521_146790600_-	3	0	4	0	0	0	0	0	0	4	0	2	2	6	0	2	0	6	1	6	0	4	0	0	0	3	45.6621	0	17.1521	0	0	0	0	0	0	20.9678	0	11.5992	5.05603	22.0668	0	8.16733	0	16.6812	1.96319	17.901	0	19.515	0
chr5_75828084_75828087_+	5	7	16	6	0	0	0	0	20	11	3	8	16	14	15	7	13	11	16	17	10	4	1	2	13	9	76.1035	32.8853	68.6086	12.4192	0	0	0	0	58.1747	57.6614	12.6734	46.397	40.4483	51.4891	32.7285	28.5857	26.6698	30.5822	31.411	50.7195	28.1047	19.515	7.19735
chr10_92456242_92456317_-	1	1	10	7	0	1	0	0	18	9	7	5	13	2	27	8	16	9	22	13	22	9	0	0	14	5	15.2207	4.6979	42.8804	14.489	0	44.6449	0	0	52.3572	47.1775	29.5713	28.9981	32.8642	7.35559	58.9113	32.6693	32.8244	25.0218	43.1901	38.7855	61.8302	43.9087	0
chr6_73313728_73313739_+	3	4	21	11	1	0	0	0	8	8	10	11	15	11	13	8	15	10	18	20	15	8	2	0	12	6	45.6621	18.7916	90.0488	22.7685	24.1727	0	0	0	23.2699	41.9355	42.2447	63.7959	37.9203	40.4558	28.3647	32.6693	30.7729	27.802	35.3374	59.67	42.157	39.0299	14.3947
chr2_140301810_140301841_-	4	2	30	29	15	1	1	4	81	22	62	19	117	23	99	18	102	25	149	24	91	15	1	0	26	5	60.8828	9.3958	128.641	60.026	362.59	44.6449	124.347	160.006	235.608	115.323	261.917	110.193	295.778	84.5893	216.008	73.506	209.256	69.5051	292.515	71.604	255.752	73.1811	7.19735
chrX_153838065_153838076_-	1	0	4	1	3	0	0	0	6	4	10	2	10	1	21	0	13	2	15	1	12	0	0	0	7	1	15.2207	0	17.1521	2.06986	72.5181	0	0	0	17.4524	20.9678	42.2447	11.5992	25.2802	3.6778	45.8199	0	26.6698	5.56041	29.4478	2.9835	33.7256	0	0
chr4_160631437_160631438_-	6	2	1	0	0	2	0	0	3	7	0	7	0	14	1	7	0	9	2	16	0	11	0	1	1	10	91.3242	9.3958	4.28804	0	0	89.2897	0	0	8.72621	36.6936	0	40.5974	0	51.4891	2.1819	28.5857	0	25.0218	3.92637	47.736	0	53.6661	0
chr5_128906435_128906526_+	4	4	5	1	0	0	0	0	1	8	2	8	1	20	1	10	2	33	4	29	3	14	0	0	5	6	60.8828	18.7916	21.4402	2.06986	0	0	0	0	2.90874	41.9355	8.44894	46.397	2.52802	73.5559	2.1819	40.8367	4.10305	91.7467	7.85275	86.5214	8.4314	68.3023	0
chr4_119135659_119135747_-	2	1	13	4	1	0	0	0	11	1	6	0	8	2	9	6	15	8	14	7	12	6	1	1	7	2	30.4414	4.6979	55.7445	8.27945	24.1727	0	0	0	31.9961	5.24194	25.3468	0	20.2241	7.35559	19.6371	24.502	30.7729	22.2416	27.4846	20.8845	33.7256	29.2724	7.19735
chr6_102998633_102998649_-	11	12	26	31	9	5	0	12	33	25	47	28	44	24	41	23	39	26	38	25	46	17	0	0	36	15	167.428	56.3748	111.489	64.1657	217.554	223.224	0	480.019	95.9883	131.049	198.55	162.389	111.233	88.2671	89.4579	93.9243	80.0095	72.2853	74.6011	74.5875	129.281	82.9386	0
chr7_95945442_95945445_+	1	1	13	7	0	0	0	0	4	3	2	1	7	4	5	2	4	3	18	2	9	2	1	0	13	2	15.2207	4.6979	55.7445	14.489	0	0	0	0	11.6349	15.7258	8.44894	5.79962	17.6961	14.7112	10.9095	8.16733	8.2061	8.34061	35.3374	5.967	25.2942	9.75748	7.19735
chr11_34617070_34617115_+	0	0	0	0	1	1	0	1	11	9	11	2	17	6	23	11	16	16	21	17	7	9	0	0	13	8	0	0	0	0	24.1727	44.6449	0	40.0016	31.9961	47.1775	46.4692	11.5992	42.9763	22.0668	50.1837	44.9203	32.8244	44.4832	41.2269	50.7195	19.6733	43.9087	0
chr4_144020845_144020849_+	6	5	4	3	0	0	0	5	4	19	1	12	7	29	1	15	3	19	5	30	4	16	1	1	7	18	91.3242	23.4895	17.1521	6.20959	0	0	0	200.008	11.6349	99.5969	4.22447	69.5955	17.6961	106.656	2.1819	61.255	6.15458	52.8239	9.81593	89.5049	11.2419	78.0598	7.19735
chr12_39753853_39753878_-	0	0	0	0	2	2	0	0	1	1	5	2	4	3	18	14	7	9	21	11	7	6	0	0	18	5	0	0	0	0	48.3454	89.2897	0	0	2.90874	5.24194	21.1224	11.5992	10.1121	11.0334	39.2742	57.1713	14.3607	25.0218	41.2269	32.8185	19.6733	29.2724	0
chr17_15313271_15313293_+	0	0	0	0	1	5	0	3	11	18	10	22	11	20	8	29	20	23	11	38	9	23	0	0	12	9	0	0	0	0	24.1727	223.224	0	120.005	31.9961	94.355	42.2447	127.592	27.8082	73.5559	17.4552	118.426	41.0305	63.9447	21.595	113.373	25.2942	112.211	0
chr6_26343854_26343856_+	1	0	5	2	0	0	0	1	4	1	1	1	6	2	3	2	5	3	5	6	4	2	0	0	5	4	15.2207	0	21.4402	4.13972	0	0	0	40.0016	11.6349	5.24194	4.22447	5.79962	15.1681	7.35559	6.5457	8.16733	10.2576	8.34061	9.81593	17.901	11.2419	9.75748	0
chr8_57413583_57413682_-	11	7	6	3	1	1	0	0	5	20	0	10	9	23	3	18	5	20	5	32	2	14	2	2	4	18	167.428	32.8853	25.7282	6.20959	24.1727	44.6449	0	0	14.5437	104.839	0	57.9962	22.7522	84.5893	6.5457	73.506	10.2576	55.6041	9.81593	95.4719	5.62093	68.3023	14.3947
chr12_11521094_11521095_-	4	1	4	2	1	0	1	1	2	1	2	3	4	4	4	6	4	3	3	5	4	3	0	0	4	3	60.8828	4.6979	17.1521	4.13972	24.1727	0	124.347	40.0016	5.81747	5.24194	8.44894	17.3989	10.1121	14.7112	8.7276	24.502	8.2061	8.34061	5.88956	14.9175	11.2419	14.6362	0
chr19_20940667_20940681_-	0	0	0	0	1	0	0	0	5	2	9	0	2	0	16	5	15	2	6	0	2	1	0	0	15	6	0	0	0	0	24.1727	0	0	0	14.5437	10.4839	38.0202	0	5.05603	0	34.9104	20.4183	30.7729	5.56041	11.7791	0	5.62093	4.87874	0
chr5_157213356_157213441_+	5	5	9	7	1	0	1	0	18	14	11	9	25	11	37	14	40	12	25	13	15	12	0	0	9	9	76.1035	23.4895	38.5923	14.489	24.1727	0	124.347	0	52.3572	73.3872	46.4692	52.1966	63.2004	40.4558	80.7303	57.1713	82.061	33.3624	49.0797	38.7855	42.157	58.5449	0
chr4_119084091_119084162_-	7	4	14	9	1	1	0	1	19	9	10	16	23	15	11	10	15	28	17	21	14	15	3	3	16	11	106.545	18.7916	60.0325	18.6288	24.1727	44.6449	0	40.0016	55.266	47.1775	42.2447	92.794	58.1444	55.1669	24.0009	40.8367	30.7729	77.8457	33.3742	62.6535	39.3465	73.1811	21.5921
chr9_83820042_83820129_-	7	4	3	1	0	0	0	0	9	16	2	11	9	28	4	19	11	23	19	34	3	14	0	0	3	5	106.545	18.7916	12.8641	2.06986	0	0	0	0	26.1786	83.8711	8.44894	63.7959	22.7522	102.978	8.7276	77.5897	22.5668	63.9447	37.3005	101.439	8.4314	68.3023	0
chr1_94680330_94680353_+	14	13	16	8	2	8	2	14	16	26	18	25	25	29	27	35	22	34	32	48	24	37	4	4	15	21	213.09	61.0727	68.6086	16.5589	48.3454	357.159	248.694	560.022	46.5398	136.29	76.0405	144.991	63.2004	106.656	58.9113	142.928	45.1336	94.5269	62.822	143.208	67.4512	180.513	28.7894
chr9_62187265_62187298_+	12	8	7	6	1	0	0	2	5	26	2	21	5	50	1	20	3	38	5	50	4	26	0	1	3	20	182.648	37.5832	30.0163	12.4192	24.1727	0	0	80.0032	14.5437	136.29	8.44894	121.792	12.6401	183.89	2.1819	81.6733	6.15458	105.648	9.81593	149.175	11.2419	126.847	0
chr7_104172887_104172983_-	0	0	6	0	0	0	0	1	3	0	5	0	3	2	9	0	4	0	5	1	5	1	0	0	4	1	0	0	25.7282	0	0	0	0	40.0016	8.72621	0	21.1224	0	7.58405	7.35559	19.6371	0	8.2061	0	9.81593	2.9835	14.0523	4.87874	0
chr7_37761241_37761274_+	1	0	4	1	0	0	0	0	4	4	1	1	7	6	6	0	6	6	4	5	3	1	0	0	5	2	15.2207	0	17.1521	2.06986	0	0	0	0	11.6349	20.9678	4.22447	5.79962	17.6961	22.0668	13.0914	0	12.3092	16.6812	7.85275	14.9175	8.4314	4.87874	0
chr1_96528711_96528755_+	0	1	2	0	2	2	0	1	1	9	4	15	2	14	10	16	2	21	8	38	5	21	0	0	6	10	0	4.6979	8.57607	0	48.3454	89.2897	0	40.0016	2.90874	47.1775	16.8979	86.9943	5.05603	51.4891	21.819	65.3387	4.10305	58.3843	15.7055	113.373	14.0523	102.454	0
chr1_8026106_8026108_-	3	0	9	6	2	0	0	0	11	3	9	1	5	4	5	4	15	5	17	8	11	5	0	0	6	3	45.6621	0	38.5923	12.4192	48.3454	0	0	0	31.9961	15.7258	38.0202	5.79962	12.6401	14.7112	10.9095	16.3347	30.7729	13.901	33.3742	23.868	30.9151	24.3937	0
chr4_67099839_67099865_+	1	4	6	2	4	3	1	4	52	29	39	17	80	45	58	27	63	48	77	41	72	16	0	0	39	9	15.2207	18.7916	25.7282	4.13972	96.6908	133.935	124.347	160.006	151.254	152.016	164.754	98.5936	202.241	165.501	126.55	110.259	129.246	133.45	151.165	122.323	202.353	78.0598	0
chr5_146692252_146692302_+	5	7	21	18	6	2	0	3	48	30	55	26	77	45	64	34	74	53	82	49	78	28	0	0	26	8	76.1035	32.8853	90.0488	37.2575	145.036	89.2897	0	120.005	139.619	157.258	232.346	150.79	194.657	165.501	139.642	138.845	151.813	147.351	160.981	146.191	219.216	136.605	0
chr4_139796399_139796407_-	1	0	11	5	0	2	0	0	21	2	9	4	17	5	22	3	15	1	35	5	23	5	2	0	12	1	15.2207	0	47.1684	10.3493	0	89.2897	0	0	61.0834	10.4839	38.0202	23.1985	42.9763	18.389	48.0018	12.251	30.7729	2.7802	68.7115	14.9175	64.6407	24.3937	14.3947
chr4_30496415_30496421_+	8	14	72	51	10	4	3	6	90	23	48	20	108	27	115	31	115	34	131	54	108	48	0	1	46	10	121.766	65.7706	308.739	105.563	241.727	178.579	373.042	240.01	261.786	120.565	202.775	115.992	273.026	99.3005	250.919	126.594	235.926	94.5269	257.177	161.109	303.53	234.179	0
chr8_73813991_73814077_+	4	2	12	7	0	0	0	0	28	7	23	9	30	12	37	7	37	8	33	12	13	4	8	0	26	11	60.8828	9.3958	51.4564	14.489	0	0	0	0	81.4446	36.6936	97.1628	52.1966	75.8405	44.1335	80.7303	28.5857	75.9065	22.2416	64.7851	35.802	36.536	19.515	57.5788
chr10_83061310_83061372_-	21	15	2	1	1	1	0	4	4	37	1	30	6	91	5	30	4	55	2	58	1	40	0	3	4	22	319.635	70.4685	8.57607	2.06986	24.1727	44.6449	0	160.006	11.6349	193.952	4.22447	173.989	15.1681	334.679	10.9095	122.51	8.2061	152.911	3.92637	173.043	2.81047	195.15	0
chr1_64162434_64162492_-	2	4	14	9	1	0	0	1	18	11	19	8	24	6	23	13	44	11	48	13	32	8	1	0	25	7	30.4414	18.7916	60.0325	18.6288	24.1727	0	0	40.0016	52.3572	57.6614	80.265	46.397	60.6724	22.0668	50.1837	53.0877	90.2671	30.5822	94.2329	38.7855	89.9349	39.0299	7.19735
chr3_52794286_52794321_+	1	0	6	4	0	0	0	0	7	2	6	4	18	7	16	2	12	9	11	5	19	5	0	0	12	3	15.2207	0	25.7282	8.27945	0	0	0	0	20.3611	10.4839	25.3468	23.1985	45.5043	25.7446	34.9104	8.16733	24.6183	25.0218	21.595	14.9175	53.3988	24.3937	0
chr4_152383382_152383394_+	1	3	22	9	0	0	0	0	5	6	10	2	14	7	18	6	14	6	25	14	17	8	1	3	22	12	15.2207	14.0937	94.3368	18.6288	0	0	0	0	14.5437	31.4517	42.2447	11.5992	35.3922	25.7446	39.2742	24.502	28.7214	16.6812	49.0797	41.769	47.7779	39.0299	7.19735
chr1_207344566_207344567_+	3	4	14	10	0	1	0	0	10	6	3	8	8	10	10	4	18	6	24	10	15	6	1	0	16	6	45.6621	18.7916	60.0325	20.6986	0	44.6449	0	0	29.0874	31.4517	12.6734	46.397	20.2241	36.778	21.819	16.3347	36.9275	16.6812	47.1165	29.835	42.157	29.2724	7.19735
chr9_62213600_62213646_+	9	5	6	6	0	4	1	4	5	26	8	19	14	40	6	31	11	51	8	48	5	34	1	0	6	9	136.986	23.4895	25.7282	12.4192	0	178.579	124.347	160.006	14.5437	136.29	33.7958	110.193	35.3922	147.112	13.0914	126.594	22.5668	141.79	15.7055	143.208	14.0523	165.877	7.19735
chr13_48451499_48451588_-	1	0	6	1	0	0	0	0	4	1	3	1	3	3	7	2	10	3	6	6	7	1	0	0	2	3	15.2207	0	25.7282	2.06986	0	0	0	0	11.6349	5.24194	12.6734	5.79962	7.58405	11.0334	15.2733	8.16733	20.5153	8.34061	11.7791	17.901	19.6733	4.87874	0
chr5_40015164_40015171_+	4	4	11	2	4	1	0	1	22	2	12	3	26	9	33	9	35	8	43	3	26	4	0	1	12	2	60.8828	18.7916	47.1684	4.13972	96.6908	44.6449	0	40.0016	63.9922	10.4839	50.6937	17.3989	65.7284	33.1002	72.0027	36.753	71.8034	22.2416	84.417	8.95049	73.0721	19.515	0
chr14_84786072_84786122_+	2	7	37	21	7	2	2	2	43	11	35	6	43	4	98	14	72	22	67	18	61	12	0	0	40	9	30.4414	32.8853	158.657	43.4671	169.209	89.2897	248.694	80.0032	125.076	57.6614	147.857	34.7977	108.705	14.7112	213.826	57.1713	147.71	61.1645	131.533	53.703	171.438	58.5449	0
chr1_94808977_94808979_+	3	6	9	3	2	6	0	7	2	20	3	12	2	19	2	15	4	20	6	22	4	17	0	0	6	13	45.6621	28.1874	38.5923	6.20959	48.3454	267.869	0	280.011	5.81747	104.839	12.6734	69.5955	5.05603	69.8781	4.3638	61.255	8.2061	55.6041	11.7791	65.637	11.2419	82.9386	0
chr10_46075236_46075238_+	1	0	10	6	2	1	0	0	3	1	4	0	5	1	7	0	6	2	11	3	10	3	0	0	13	1	15.2207	0	42.8804	12.4192	48.3454	44.6449	0	0	8.72621	5.24194	16.8979	0	12.6401	3.6778	15.2733	0	12.3092	5.56041	21.595	8.95049	28.1047	14.6362	0
chr5_21981017_21981018_-	3	2	9	7	2	0	0	0	7	3	11	5	7	2	7	1	13	5	11	5	9	1	0	1	13	5	45.6621	9.3958	38.5923	14.489	48.3454	0	0	0	20.3611	15.7258	46.4692	28.9981	17.6961	7.35559	15.2733	4.08367	26.6698	13.901	21.595	14.9175	25.2942	4.87874	0
chr1_159882061_159882145_+	7	3	2	0	0	2	0	2	1	7	1	6	1	16	2	8	4	17	8	9	0	11	0	0	2	4	106.545	14.0937	8.57607	0	0	89.2897	0	80.0032	2.90874	36.6936	4.22447	34.7977	2.52802	58.8447	4.3638	32.6693	8.2061	47.2634	15.7055	26.8515	0	53.6661	0
chr18_74703198_74703280_-	5	1	4	2	3	1	0	0	19	9	7	3	16	7	14	8	16	8	16	22	14	9	1	0	10	2	76.1035	4.6979	17.1521	4.13972	72.5181	44.6449	0	0	55.266	47.1775	29.5713	17.3989	40.4483	25.7446	30.5466	32.6693	32.8244	22.2416	31.411	65.637	39.3465	43.9087	7.19735
chr5_148241235_148241321_+	15	20	60	35	8	4	2	6	69	61	52	76	85	103	76	73	74	94	100	142	66	56	13	7	57	39	228.311	93.958	257.282	72.4452	193.382	178.579	248.694	240.01	200.703	319.758	219.673	440.771	214.881	378.813	165.824	298.108	151.813	261.339	196.319	423.657	185.491	273.209	93.5656
chr6_2734486_2734517_-	3	0	3	1	0	0	0	0	3	6	2	0	3	4	3	4	4	8	6	3	1	6	0	0	1	4	45.6621	0	12.8641	2.06986	0	0	0	0	8.72621	31.4517	8.44894	0	7.58405	14.7112	6.5457	16.3347	8.2061	22.2416	11.7791	8.95049	2.81047	29.2724	0
chr13_107821647_107821739_+	65	46	41	38	7	6	0	6	27	102	44	117	49	188	32	112	46	188	56	214	27	139	10	10	38	70	989.346	216.103	175.809	78.6548	169.209	267.869	0	240.01	78.5359	534.678	185.877	678.556	123.873	691.426	69.8208	457.371	94.3702	522.678	109.938	638.469	75.8826	678.145	71.9735
chr6_3285861_3285939_+	5	3	8	5	4	2	0	10	10	18	8	9	22	26	13	10	15	23	14	24	12	15	0	4	10	15	76.1035	14.0937	34.3043	10.3493	96.6908	89.2897	0	400.016	29.0874	94.355	33.7958	52.1966	55.6164	95.6227	28.3647	40.8367	30.7729	63.9447	27.4846	71.604	33.7256	73.1811	0
chr19_12047383_12047472_-	17	10	5	5	0	0	0	2	8	44	5	24	9	41	8	38	13	54	13	63	11	44	1	3	6	20	258.752	46.979	21.4402	10.3493	0	0	0	80.0032	23.2699	230.645	21.1224	139.191	22.7522	150.79	17.4552	155.179	26.6698	150.131	25.5214	187.96	30.9151	214.665	7.19735
chr1_35143704_35143760_+	2	1	13	9	3	1	0	0	20	5	11	7	21	2	23	1	33	4	32	15	19	5	1	0	11	3	30.4414	4.6979	55.7445	18.6288	72.5181	44.6449	0	0	58.1747	26.2097	46.4692	40.5974	53.0884	7.35559	50.1837	4.08367	67.7004	11.1208	62.822	44.7525	53.3988	24.3937	7.19735
chr10_15272402_15272502_-	3	0	6	4	1	0	0	1	5	4	0	0	9	3	11	8	8	10	14	4	12	3	0	0	7	2	45.6621	0	25.7282	8.27945	24.1727	0	0	40.0016	14.5437	20.9678	0	0	22.7522	11.0334	24.0009	32.6693	16.4122	27.802	27.4846	11.934	33.7256	14.6362	0
chr12_10777290_10777347_-	3	1	5	0	0	0	0	0	1	7	1	4	1	8	0	6	2	10	2	11	4	2	1	2	5	9	45.6621	4.6979	21.4402	0	0	0	0	0	2.90874	36.6936	4.22447	23.1985	2.52802	29.4224	0	24.502	4.10305	27.802	3.92637	32.8185	11.2419	9.75748	7.19735
chr10_59880123_59880125_+	4	2	2	0	1	1	0	0	2	5	1	1	3	7	2	6	2	9	2	6	0	7	0	0	3	5	60.8828	9.3958	8.57607	0	24.1727	44.6449	0	0	5.81747	26.2097	4.22447	5.79962	7.58405	25.7446	4.3638	24.502	4.10305	25.0218	3.92637	17.901	0	34.1512	0
chr8_85372941_85372945_-	3	0	7	1	0	0	0	0	4	3	3	4	9	7	3	1	10	7	12	3	9	0	1	1	3	3	45.6621	0	30.0163	2.06986	0	0	0	0	11.6349	15.7258	12.6734	23.1985	22.7522	25.7446	6.5457	4.08367	20.5153	19.4614	23.5582	8.95049	25.2942	0	7.19735
chr1_197176004_197176019_+	4	3	10	10	8	1	0	1	35	5	35	10	39	13	35	12	40	18	56	20	48	11	0	0	17	6	60.8828	14.0937	42.8804	20.6986	193.382	44.6449	0	40.0016	101.806	26.2097	147.857	57.9962	98.5927	47.8113	76.3665	49.004	82.061	50.0436	109.938	59.67	134.902	53.6661	0
chr8_112775836_112775840_+	14	9	5	9	5	0	0	1	4	11	6	19	6	44	4	31	2	35	4	47	0	32	0	0	9	26	213.09	42.2811	21.4402	18.6288	120.863	0	0	40.0016	11.6349	57.6614	25.3468	110.193	15.1681	161.823	8.7276	126.594	4.10305	97.3071	7.85275	140.224	0	156.12	0
chr7_115158463_115158559_-	2	0	10	10	0	0	0	0	7	5	9	5	15	6	17	3	19	13	24	8	13	7	1	0	21	4	30.4414	0	42.8804	20.6986	0	0	0	0	20.3611	26.2097	38.0202	28.9981	37.9203	22.0668	37.0923	12.251	38.979	36.1426	47.1165	23.868	36.536	34.1512	7.19735
chr15_59816482_59816561_-	1	0	4	1	0	0	0	0	3	0	4	2	3	1	3	1	2	4	5	5	4	4	0	0	4	3	15.2207	0	17.1521	2.06986	0	0	0	0	8.72621	0	16.8979	11.5992	7.58405	3.6778	6.5457	4.08367	4.10305	11.1208	9.81593	14.9175	11.2419	19.515	0
chr15_59755668_59755736_-	1	1	5	3	2	0	0	0	3	1	7	3	2	3	5	0	7	4	8	5	9	2	0	0	11	5	15.2207	4.6979	21.4402	6.20959	48.3454	0	0	0	8.72621	5.24194	29.5713	17.3989	5.05603	11.0334	10.9095	0	14.3607	11.1208	15.7055	14.9175	25.2942	9.75748	0
chr2_12119289_12119290_+	5	0	6	1	0	0	0	0	6	3	6	1	8	4	8	2	8	1	13	6	8	2	1	0	5	0	76.1035	0	25.7282	2.06986	0	0	0	0	17.4524	15.7258	25.3468	5.79962	20.2241	14.7112	17.4552	8.16733	16.4122	2.7802	25.5214	17.901	22.4837	9.75748	7.19735
chr3_75305108_75305203_+	0	0	23	16	6	0	1	0	39	11	42	5	55	9	68	16	79	14	91	9	57	12	0	0	24	2	0	0	98.6248	33.1178	145.036	0	124.347	0	113.441	57.6614	177.428	28.9981	139.041	33.1002	148.369	65.3387	162.071	38.9228	178.65	26.8515	160.197	58.5449	0
chr8_79970206_79970271_+	7	7	24	13	2	3	0	2	24	27	7	19	23	22	15	13	36	17	30	28	15	14	5	1	13	15	106.545	32.8853	102.913	26.9082	48.3454	133.935	0	80.0032	69.8097	141.532	29.5713	110.193	58.1444	80.9115	32.7285	53.0877	73.8549	47.2634	58.8956	83.538	42.157	68.3023	35.9868
chr19_9811821_9811847_-	4	1	8	8	0	0	0	1	11	2	6	6	8	10	14	5	9	11	16	11	15	5	0	0	13	3	60.8828	4.6979	34.3043	16.5589	0	0	0	40.0016	31.9961	10.4839	25.3468	34.7977	20.2241	36.778	30.5466	20.4183	18.4637	30.5822	31.411	32.8185	42.157	24.3937	0
chr19_9815426_9815457_-	1	4	8	2	3	0	0	1	19	10	11	7	24	12	21	7	23	16	19	8	11	9	1	0	24	6	15.2207	18.7916	34.3043	4.13972	72.5181	0	0	40.0016	55.266	52.4194	46.4692	40.5974	60.6724	44.1335	45.8199	28.5857	47.1851	44.4832	37.3005	23.868	30.9151	43.9087	7.19735
chr18_64176042_64176110_-	0	0	10	3	1	0	0	1	19	5	4	8	8	3	13	3	13	5	17	6	9	8	3	0	13	6	0	0	42.8804	6.20959	24.1727	0	0	40.0016	55.266	26.2097	16.8979	46.397	20.2241	11.0334	28.3647	12.251	26.6698	13.901	33.3742	17.901	25.2942	39.0299	21.5921
chr3_149496406_149496409_+	3	0	3	0	1	1	0	2	2	7	0	10	5	10	1	5	2	8	0	4	2	6	0	0	1	1	45.6621	0	12.8641	0	24.1727	44.6449	0	80.0032	5.81747	36.6936	0	57.9962	12.6401	36.778	2.1819	20.4183	4.10305	22.2416	0	11.934	5.62093	29.2724	0
chr1_149259960_149260027_+	24	24	80	37	8	5	0	12	94	54	48	47	109	72	91	53	104	88	136	70	85	47	18	5	81	25	365.297	112.75	343.043	76.5849	193.382	223.224	0	480.019	273.421	283.065	202.775	272.582	275.554	264.801	198.553	216.434	213.359	244.658	266.993	208.845	238.89	229.301	129.552
chr20_11397156_11397200_-	3	1	9	6	0	0	0	0	2	3	4	1	2	2	4	1	7	7	4	2	8	0	1	0	6	7	45.6621	4.6979	38.5923	12.4192	0	0	0	0	5.81747	15.7258	16.8979	5.79962	5.05603	7.35559	8.7276	4.08367	14.3607	19.4614	7.85275	5.967	22.4837	0	7.19735
chr9_83723637_83723638_-	6	1	1	1	2	0	0	0	0	5	1	6	2	9	0	5	4	7	2	10	2	10	0	0	2	5	91.3242	4.6979	4.28804	2.06986	48.3454	0	0	0	0	26.2097	4.22447	34.7977	5.05603	33.1002	0	20.4183	8.2061	19.4614	3.92637	29.835	5.62093	48.7874	0
chr10_14144042_14144062_-	0	2	10	3	1	0	0	2	16	18	6	12	28	9	26	18	28	18	31	19	23	12	0	0	9	6	0	9.3958	42.8804	6.20959	24.1727	0	0	80.0032	46.5398	94.355	25.3468	69.5955	70.7845	33.1002	56.7294	73.506	57.4427	50.0436	60.8588	56.6865	64.6407	58.5449	0
chr7_131825868_131825916_-	0	0	10	5	10	2	0	4	44	8	37	10	43	12	48	16	51	19	39	21	60	16	0	0	12	1	0	0	42.8804	10.3493	241.727	89.2897	0	160.006	127.984	41.9355	156.305	57.9962	108.705	44.1335	104.731	65.3387	104.628	52.8239	76.5643	62.6535	168.628	78.0598	0
chr9_62199902_62199944_+	4	1	3	1	1	0	0	1	2	19	2	13	4	36	3	15	3	26	3	31	3	20	0	2	5	8	60.8828	4.6979	12.8641	2.06986	24.1727	0	0	40.0016	5.81747	99.5969	8.44894	75.3951	10.1121	132.401	6.5457	61.255	6.15458	72.2853	5.88956	92.4884	8.4314	97.5748	0
chr6_109156728_109156822_+	0	1	8	4	0	0	0	0	19	4	20	0	24	4	36	3	38	5	30	5	28	7	0	0	12	4	0	4.6979	34.3043	8.27945	0	0	0	0	55.266	20.9678	84.4894	0	60.6724	14.7112	78.5484	12.251	77.958	13.901	58.8956	14.9175	78.693	34.1512	0
chr18_32191495_32191524_+	3	0	9	5	1	0	0	1	6	2	0	4	9	4	7	3	11	2	11	6	15	3	1	1	8	3	45.6621	0	38.5923	10.3493	24.1727	0	0	40.0016	17.4524	10.4839	0	23.1985	22.7522	14.7112	15.2733	12.251	22.5668	5.56041	21.595	17.901	42.157	14.6362	7.19735
chr8_21124794_21124795_-	5	2	5	3	1	0	0	2	8	7	0	3	8	4	11	6	10	10	7	2	2	2	0	0	4	3	76.1035	9.3958	21.4402	6.20959	24.1727	0	0	80.0032	23.2699	36.6936	0	17.3989	20.2241	14.7112	24.0009	24.502	20.5153	27.802	13.7423	5.967	5.62093	9.75748	0
chr3_11478472_11478476_-	3	3	6	0	0	0	0	0	29	2	17	2	24	9	24	10	29	9	27	11	30	5	0	0	12	2	45.6621	14.0937	25.7282	0	0	0	0	0	84.3533	10.4839	71.816	11.5992	60.6724	33.1002	52.3656	40.8367	59.4943	25.0218	53.006	32.8185	84.314	24.3937	0
chr18_28609544_28609545_+	2	1	5	1	0	0	0	0	5	2	4	2	4	3	2	0	5	4	9	9	6	5	0	0	2	4	30.4414	4.6979	21.4402	2.06986	0	0	0	0	14.5437	10.4839	16.8979	11.5992	10.1121	11.0334	4.3638	0	10.2576	11.1208	17.6687	26.8515	16.8628	24.3937	0
chr15_59768517_59768588_-	1	1	3	0	0	0	0	0	9	0	3	1	5	2	5	0	4	4	8	5	1	1	0	0	4	5	15.2207	4.6979	12.8641	0	0	0	0	0	26.1786	0	12.6734	5.79962	12.6401	7.35559	10.9095	0	8.2061	11.1208	15.7055	14.9175	2.81047	4.87874	0
chr3_44116860_44116907_+	14	13	38	36	0	0	0	5	35	38	16	50	48	55	20	21	44	53	49	61	49	34	11	6	60	27	213.09	61.0727	162.945	74.515	0	0	0	200.008	101.806	199.194	67.5915	289.981	121.345	202.279	43.638	85.757	90.2671	147.351	96.1961	181.993	137.713	165.877	79.1709
chr6_26341879_26341903_+	5	4	11	8	5	1	1	1	26	7	13	3	29	9	30	16	56	19	44	22	43	12	0	1	9	6	76.1035	18.7916	47.1684	16.5589	120.863	44.6449	124.347	40.0016	75.6271	36.6936	54.9181	17.3989	73.3125	33.1002	65.457	65.3387	114.885	52.8239	86.3802	65.637	120.85	58.5449	0
chr1_80304923_80304980_-	24	34	45	37	0	1	0	5	22	44	20	54	25	92	26	41	19	71	37	111	18	51	9	1	47	51	365.297	159.729	192.962	76.5849	0	44.6449	0	200.008	63.9922	230.645	84.4894	313.18	63.2004	338.357	56.7294	167.43	38.979	197.394	72.6379	331.168	50.5884	248.816	64.7762
chr11_82463617_82463646_-	5	3	11	8	0	0	0	0	13	0	8	1	8	2	3	2	11	8	13	6	16	4	1	1	13	4	76.1035	14.0937	47.1684	16.5589	0	0	0	0	37.8136	0	33.7958	5.79962	20.2241	7.35559	6.5457	8.16733	22.5668	22.2416	25.5214	17.901	44.9674	19.515	7.19735
chr18_30752680_30752687_+	13	11	1	1	0	0	0	1	0	19	0	17	2	28	3	24	3	41	0	15	1	12	0	4	7	33	197.869	51.6769	4.28804	2.06986	0	0	0	40.0016	0	99.5969	0	98.5936	5.05603	102.978	6.5457	98.008	6.15458	113.988	0	44.7525	2.81047	58.5449	0
chr3_76316681_76316715_-	4	1	4	4	0	0	0	2	3	4	4	5	3	10	9	5	8	6	5	7	4	6	1	0	9	7	60.8828	4.6979	17.1521	8.27945	0	0	0	80.0032	8.72621	20.9678	16.8979	28.9981	7.58405	36.778	19.6371	20.4183	16.4122	16.6812	9.81593	20.8845	11.2419	29.2724	7.19735
chr13_2059737_2059810_-	4	1	1	0	0	0	0	2	2	14	2	13	3	24	1	6	3	30	2	21	0	15	0	0	1	6	60.8828	4.6979	4.28804	0	0	0	0	80.0032	5.81747	73.3872	8.44894	75.3951	7.58405	88.2671	2.1819	24.502	6.15458	83.4061	3.92637	62.6535	0	73.1811	0
chr10_12852328_12852360_-	1	0	3	0	0	0	0	1	5	6	4	3	9	6	8	5	7	10	12	6	7	3	0	0	3	2	15.2207	0	12.8641	0	0	0	0	40.0016	14.5437	31.4517	16.8979	17.3989	22.7522	22.0668	17.4552	20.4183	14.3607	27.802	23.5582	17.901	19.6733	14.6362	0
chr6_41976108_41976172_-	12	26	86	66	26	6	1	8	160	31	126	39	167	41	209	45	218	46	219	48	189	36	2	0	72	22	182.648	122.145	368.771	136.611	628.49	267.869	124.347	320.013	465.398	162.5	532.283	226.185	422.179	150.79	456.017	183.765	447.233	127.889	429.938	143.208	531.178	175.635	14.3947
chr12_27928395_27928477_+	0	0	0	0	1	0	0	0	4	1	7	1	7	3	27	1	19	5	13	2	11	0	0	0	19	3	0	0	0	0	24.1727	0	0	0	11.6349	5.24194	29.5713	5.79962	17.6961	11.0334	58.9113	4.08367	38.979	13.901	25.5214	5.967	30.9151	0	0
chr14_109434858_109434872_-	0	0	4	0	3	1	0	0	7	5	4	8	9	2	7	4	10	7	14	6	12	8	0	0	5	2	0	0	17.1521	0	72.5181	44.6449	0	0	20.3611	26.2097	16.8979	46.397	22.7522	7.35559	15.2733	16.3347	20.5153	19.4614	27.4846	17.901	33.7256	39.0299	0
chr17_46074256_46074332_-	1	0	5	1	2	0	0	0	7	2	8	2	19	6	15	4	27	12	43	9	13	4	0	1	6	3	15.2207	0	21.4402	2.06986	48.3454	0	0	0	20.3611	10.4839	33.7958	11.5992	48.0323	22.0668	32.7285	16.3347	55.3912	33.3624	84.417	26.8515	36.536	19.515	0
chr8_58260293_58260368_+	7	3	7	4	0	0	0	1	9	6	6	7	11	8	7	2	8	9	15	11	8	4	3	0	9	6	106.545	14.0937	30.0163	8.27945	0	0	0	40.0016	26.1786	31.4517	25.3468	40.5974	27.8082	29.4224	15.2733	8.16733	16.4122	25.0218	29.4478	32.8185	22.4837	19.515	21.5921
chr17_50429683_50429690_-	1	0	10	2	1	0	0	0	13	2	10	1	14	4	11	3	11	3	18	5	10	5	2	0	8	1	15.2207	0	42.8804	4.13972	24.1727	0	0	0	37.8136	10.4839	42.2447	5.79962	35.3922	14.7112	24.0009	12.251	22.5668	8.34061	35.3374	14.9175	28.1047	24.3937	14.3947
chr7_115847661_115847735_-	3	5	34	28	4	0	1	1	29	3	25	6	38	4	63	9	60	21	76	19	39	5	5	0	37	12	45.6621	23.4895	145.793	57.9561	96.6908	0	124.347	40.0016	84.3533	15.7258	105.612	34.7977	96.0646	14.7112	137.46	36.753	123.092	58.3843	149.202	56.6865	109.608	24.3937	35.9868
chr4_152365101_152365145_+	2	0	12	6	0	1	0	0	16	2	7	3	10	8	18	4	21	11	15	8	10	4	0	2	10	2	30.4414	0	51.4564	12.4192	0	44.6449	0	0	46.5398	10.4839	29.5713	17.3989	25.2802	29.4224	39.2742	16.3347	43.082	30.5822	29.4478	23.868	28.1047	19.515	0
chr5_61578530_61578589_+	2	0	6	0	0	0	0	0	1	1	1	1	5	3	2	2	0	0	5	4	1	1	0	0	1	0	30.4414	0	25.7282	0	0	0	0	0	2.90874	5.24194	4.22447	5.79962	12.6401	11.0334	4.3638	8.16733	0	0	9.81593	11.934	2.81047	4.87874	0
chr11_31030947_31030950_-	1	0	2	0	0	0	0	0	1	0	5	1	3	1	4	1	6	2	4	3	4	4	0	0	5	2	15.2207	0	8.57607	0	0	0	0	0	2.90874	0	21.1224	5.79962	7.58405	3.6778	8.7276	4.08367	12.3092	5.56041	7.85275	8.95049	11.2419	19.515	0
chr13_96320038_96320111_+	2	0	4	1	0	0	0	0	1	2	7	2	5	2	6	3	3	1	10	1	2	0	1	0	7	2	30.4414	0	17.1521	2.06986	0	0	0	0	2.90874	10.4839	29.5713	11.5992	12.6401	7.35559	13.0914	12.251	6.15458	2.7802	19.6319	2.9835	5.62093	0	7.19735
chr1_24279819_24279878_+	1	0	1	0	4	0	1	0	7	3	6	5	13	4	13	2	14	3	16	9	13	2	0	0	5	4	15.2207	0	4.28804	0	96.6908	0	124.347	0	20.3611	15.7258	25.3468	28.9981	32.8642	14.7112	28.3647	8.16733	28.7214	8.34061	31.411	26.8515	36.536	9.75748	0
chr3_92432810_92432818_+	1	1	4	0	6	1	1	4	22	5	18	6	19	4	25	6	23	5	25	4	21	4	0	0	8	1	15.2207	4.6979	17.1521	0	145.036	44.6449	124.347	160.006	63.9922	26.2097	76.0405	34.7977	48.0323	14.7112	54.5475	24.502	47.1851	13.901	49.0797	11.934	59.0198	19.515	0
chr7_124163441_124163538_-	3	8	34	15	0	0	0	1	22	14	9	17	27	19	25	12	33	26	42	25	22	15	5	0	28	12	45.6621	37.5832	145.793	31.0479	0	0	0	40.0016	63.9922	73.3872	38.0202	98.5936	68.2565	69.8781	54.5475	49.004	67.7004	72.2853	82.4538	74.5875	61.8302	73.1811	35.9868
chr10_52895067_52895069_-	0	0	4	3	0	0	0	0	2	2	1	3	2	3	4	3	3	7	0	4	3	1	0	0	13	8	0	0	17.1521	6.20959	0	0	0	0	5.81747	10.4839	4.22447	17.3989	5.05603	11.0334	8.7276	12.251	6.15458	19.4614	0	11.934	8.4314	4.87874	0
chr3_116299272_116299297_-	1	2	10	3	3	0	1	2	18	4	18	4	19	2	36	10	33	4	21	8	21	7	3	0	19	2	15.2207	9.3958	42.8804	6.20959	72.5181	0	124.347	80.0032	52.3572	20.9678	76.0405	23.1985	48.0323	7.35559	78.5484	40.8367	67.7004	11.1208	41.2269	23.868	59.0198	34.1512	21.5921
chr3_3454248_3454250_-	2	1	1	0	0	0	0	0	2	2	0	4	0	6	0	4	1	6	1	4	0	1	0	0	2	10	30.4414	4.6979	4.28804	0	0	0	0	0	5.81747	10.4839	0	23.1985	0	22.0668	0	16.3347	2.05153	16.6812	1.96319	11.934	0	4.87874	0
chr4_143954877_143954880_+	2	0	1	1	2	0	0	1	6	15	2	11	6	14	7	8	7	18	9	11	5	10	0	0	4	7	30.4414	0	4.28804	2.06986	48.3454	0	0	40.0016	17.4524	78.6291	8.44894	63.7959	15.1681	51.4891	15.2733	32.6693	14.3607	50.0436	17.6687	32.8185	14.0523	48.7874	0
chr10_10683840_10683912_+	6	3	25	21	11	3	0	1	36	11	35	5	46	10	74	19	76	20	87	20	68	18	3	1	41	2	91.3242	14.0937	107.201	43.4671	265.9	133.935	0	40.0016	104.714	57.6614	147.857	28.9981	116.289	36.778	161.461	77.5897	155.916	55.6041	170.797	59.67	191.112	87.8173	21.5921
chr20_18100581_18100645_+	3	5	29	16	6	1	0	2	50	13	37	2	61	8	55	10	55	9	58	18	58	7	0	0	9	7	45.6621	23.4895	124.353	33.1178	145.036	44.6449	0	80.0032	145.437	68.1452	156.305	11.5992	154.209	29.4224	120.005	40.8367	112.834	25.0218	113.865	53.703	163.007	34.1512	0
chr18_81528791_81528794_-	1	1	7	0	0	0	0	0	3	1	2	1	4	0	5	1	6	3	7	2	3	2	0	0	2	1	15.2207	4.6979	30.0163	0	0	0	0	0	8.72621	5.24194	8.44894	5.79962	10.1121	0	10.9095	4.08367	12.3092	8.34061	13.7423	5.967	8.4314	9.75748	0
chr6_128870684_128870685_-	2	1	4	1	0	0	0	1	1	2	2	4	3	7	1	2	1	6	4	6	3	4	0	0	3	4	30.4414	4.6979	17.1521	2.06986	0	0	0	40.0016	2.90874	10.4839	8.44894	23.1985	7.58405	25.7446	2.1819	8.16733	2.05153	16.6812	7.85275	17.901	8.4314	19.515	0
chr4_50657412_50657492_-	2	0	5	1	0	0	0	0	6	2	5	1	8	5	5	2	8	3	14	1	5	2	0	0	1	2	30.4414	0	21.4402	2.06986	0	0	0	0	17.4524	10.4839	21.1224	5.79962	20.2241	18.389	10.9095	8.16733	16.4122	8.34061	27.4846	2.9835	14.0523	9.75748	0
chr8_73811637_73811737_+	2	2	15	13	1	0	0	0	34	6	20	10	32	11	31	10	45	11	32	11	13	10	2	1	26	9	30.4414	9.3958	64.3205	26.9082	24.1727	0	0	0	98.897	31.4517	84.4894	57.9962	80.8965	40.4558	67.6389	40.8367	92.3187	30.5822	62.822	32.8185	36.536	48.7874	14.3947
chr4_143970402_143970479_+	116	132	212	102	12	8	2	28	145	287	105	269	194	414	114	246	180	442	222	400	139	277	32	51	216	269	1765.6	620.123	909.064	211.126	290.072	357.159	248.694	1120.04	421.767	1504.44	443.57	1560.1	490.435	1522.61	248.737	1004.58	369.275	1228.85	435.827	1193.4	390.655	1351.41	230.315
chr10_67740402_67740461_+	1	0	6	1	0	0	0	0	30	6	10	2	25	2	21	7	14	4	20	2	28	3	0	0	4	0	15.2207	0	25.7282	2.06986	0	0	0	0	87.2621	31.4517	42.2447	11.5992	63.2004	7.35559	45.8199	28.5857	28.7214	11.1208	39.2637	5.967	78.693	14.6362	0
chr6_3249544_3249545_+	2	2	4	1	1	0	0	1	3	7	1	10	6	6	2	3	3	7	5	7	4	5	0	0	6	4	30.4414	9.3958	17.1521	2.06986	24.1727	0	0	40.0016	8.72621	36.6936	4.22447	57.9962	15.1681	22.0668	4.3638	12.251	6.15458	19.4614	9.81593	20.8845	11.2419	24.3937	0
chr12_35300334_35300336_+	7	8	9	6	2	1	0	4	3	15	5	11	15	19	7	13	7	27	12	18	5	20	0	2	7	17	106.545	37.5832	38.5923	12.4192	48.3454	44.6449	0	160.006	8.72621	78.6291	21.1224	63.7959	37.9203	69.8781	15.2733	53.0877	14.3607	75.0655	23.5582	53.703	14.0523	97.5748	0
chr4_149668670_149668751_-	179	167	63	54	17	32	0	45	57	394	35	346	71	574	56	385	61	628	85	622	41	462	10	13	47	327	2724.51	784.55	270.146	111.773	410.936	1428.64	0	1800.07	165.798	2065.33	147.857	2006.67	179.489	2111.05	122.186	1572.21	125.143	1745.97	166.871	1855.74	115.229	2253.98	71.9735
chr3_8998851_8998854_+	2	1	11	4	0	0	0	0	6	0	1	2	8	2	5	0	6	3	5	4	5	3	0	0	2	1	30.4414	4.6979	47.1684	8.27945	0	0	0	0	17.4524	0	4.22447	11.5992	20.2241	7.35559	10.9095	0	12.3092	8.34061	9.81593	11.934	14.0523	14.6362	0
chr16_19624925_19624930_-	4	0	16	9	2	1	0	0	7	2	8	2	13	6	8	6	13	6	18	12	17	5	0	1	3	3	60.8828	0	68.6086	18.6288	48.3454	44.6449	0	0	20.3611	10.4839	33.7958	11.5992	32.8642	22.0668	17.4552	24.502	26.6698	16.6812	35.3374	35.802	47.7779	24.3937	0
chr1_64146586_64146587_-	3	1	3	3	0	0	0	0	3	1	0	4	1	0	3	3	5	5	4	1	4	2	0	0	12	4	45.6621	4.6979	12.8641	6.20959	0	0	0	0	8.72621	5.24194	0	23.1985	2.52802	0	6.5457	12.251	10.2576	13.901	7.85275	2.9835	11.2419	9.75748	0
chr10_10960301_10960365_-	15	24	111	101	20	5	4	6	137	30	104	25	186	36	189	45	203	56	268	64	204	44	6	0	65	26	228.311	112.75	475.972	209.056	483.454	223.224	497.389	240.01	398.497	157.258	439.345	144.991	470.211	132.401	412.379	183.765	416.46	155.691	526.134	190.944	573.335	214.665	43.1841
chr6_3263933_3264031_+	2	6	16	2	0	1	0	3	15	18	8	10	26	27	25	24	8	27	22	28	28	17	1	3	15	14	30.4414	28.1874	68.6086	4.13972	0	44.6449	0	120.005	43.631	94.355	33.7958	57.9962	65.7284	99.3005	54.5475	98.008	16.4122	75.0655	43.1901	83.538	78.693	82.9386	7.19735
chr7_120321862_120321865_+	1	0	4	0	0	0	0	0	4	4	1	0	4	2	2	3	2	4	1	0	3	2	0	0	1	3	15.2207	0	17.1521	0	0	0	0	0	11.6349	20.9678	4.22447	0	10.1121	7.35559	4.3638	12.251	4.10305	11.1208	1.96319	0	8.4314	9.75748	0
chr10_83197141_83197196_-	1	0	8	0	1	0	0	1	3	1	3	0	6	1	10	0	10	4	8	1	6	4	0	0	1	0	15.2207	0	34.3043	0	24.1727	0	0	40.0016	8.72621	5.24194	12.6734	0	15.1681	3.6778	21.819	0	20.5153	11.1208	15.7055	2.9835	16.8628	19.515	0
chr7_142125534_142125628_-	7	17	50	28	12	9	11	14	89	27	62	27	82	27	83	64	97	72	102	26	79	26	6	2	31	30	106.545	79.8643	214.402	57.9561	290.072	401.804	1367.82	560.022	258.877	141.532	261.917	156.59	207.297	99.3005	181.098	261.355	198.998	200.175	200.245	77.571	222.027	126.847	43.1841
chr4_164137647_164137740_-	8	16	30	19	1	0	0	1	40	31	29	29	53	63	33	27	34	55	63	60	30	44	6	0	40	23	121.766	75.1664	128.641	39.3274	24.1727	0	0	40.0016	116.349	162.5	122.51	168.189	133.985	231.701	72.0027	110.259	69.7519	152.911	123.681	179.01	84.314	214.665	43.1841
chr10_4249150_4249182_+	11	14	45	59	4	1	0	0	33	6	40	15	38	18	62	35	53	29	49	30	61	12	0	0	50	16	167.428	65.7706	192.962	122.122	96.6908	44.6449	0	0	95.9883	31.4517	168.979	86.9943	96.0646	66.2003	135.278	142.928	108.731	80.6259	96.1961	89.5049	171.438	58.5449	0
chr7_57519188_57519259_+	4	2	16	9	14	3	1	4	68	37	63	49	100	72	91	46	102	50	150	107	95	40	10	7	47	22	60.8828	9.3958	68.6086	18.6288	338.418	133.935	124.347	160.006	197.794	193.952	266.142	284.182	252.802	264.801	198.553	187.849	209.256	139.01	294.478	319.234	266.994	195.15	71.9735
chr16_19619530_19619531_-	1	0	3	0	0	0	0	0	3	1	2	1	3	4	4	1	5	2	5	4	0	2	0	0	4	1	15.2207	0	12.8641	0	0	0	0	0	8.72621	5.24194	8.44894	5.79962	7.58405	14.7112	8.7276	4.08367	10.2576	5.56041	9.81593	11.934	0	9.75748	0
chr3_8969882_8969883_+	2	1	6	2	1	0	0	0	11	5	4	11	9	9	11	6	9	8	10	5	10	5	1	0	6	3	30.4414	4.6979	25.7282	4.13972	24.1727	0	0	0	31.9961	26.2097	16.8979	63.7959	22.7522	33.1002	24.0009	24.502	18.4637	22.2416	19.6319	14.9175	28.1047	24.3937	7.19735
chr17_15168799_15168856_+	0	1	3	1	2	0	0	0	21	5	11	6	20	8	24	2	24	6	31	10	17	8	0	0	12	4	0	4.6979	12.8641	2.06986	48.3454	0	0	0	61.0834	26.2097	46.4692	34.7977	50.5603	29.4224	52.3656	8.16733	49.2366	16.6812	60.8588	29.835	47.7779	39.0299	0
chr1_212756548_212756623_-	5	0	1	1	1	1	0	0	1	9	1	9	2	10	1	7	1	8	1	13	2	10	0	0	1	5	76.1035	0	4.28804	2.06986	24.1727	44.6449	0	0	2.90874	47.1775	4.22447	52.1966	5.05603	36.778	2.1819	28.5857	2.05153	22.2416	1.96319	38.7855	5.62093	48.7874	0
chr10_10816473_10816503_+	4	0	3	1	0	0	0	0	1	1	1	0	3	1	2	1	2	3	1	1	2	0	0	0	2	1	60.8828	0	12.8641	2.06986	0	0	0	0	2.90874	5.24194	4.22447	0	7.58405	3.6778	4.3638	4.08367	4.10305	8.34061	1.96319	2.9835	5.62093	0	0
chr19_53828973_53829072_-	0	0	11	3	0	0	0	0	5	4	7	6	6	6	9	4	4	5	13	8	3	1	0	1	8	1	0	0	47.1684	6.20959	0	0	0	0	14.5437	20.9678	29.5713	34.7977	15.1681	22.0668	19.6371	16.3347	8.2061	13.901	25.5214	23.868	8.4314	4.87874	0
chr5_21995169_21995254_-	53	60	201	143	52	8	3	17	397	149	214	134	449	252	312	156	444	279	469	271	348	186	26	19	274	104	806.697	281.874	861.895	295.99	1256.98	357.159	373.042	680.027	1154.77	781.049	904.037	777.149	1135.08	926.805	680.753	637.052	910.878	775.677	920.734	808.528	978.042	907.445	187.131
chr1_64172425_64172427_-	0	1	13	5	0	0	0	0	6	2	9	2	7	3	3	2	9	5	10	4	7	6	1	1	12	6	0	4.6979	55.7445	10.3493	0	0	0	0	17.4524	10.4839	38.0202	11.5992	17.6961	11.0334	6.5457	8.16733	18.4637	13.901	19.6319	11.934	19.6733	29.2724	7.19735
chr4_117562519_117562568_+	2	2	10	11	8	1	5	8	39	17	35	13	44	14	49	18	42	14	50	21	29	9	0	0	25	8	30.4414	9.3958	42.8804	22.7685	193.382	44.6449	621.736	320.013	113.441	89.113	147.857	75.3951	111.233	51.4891	106.913	73.506	86.1641	38.9228	98.1593	62.6535	81.5035	43.9087	0
chr5_63299425_63299517_-	9	8	4	5	0	4	0	2	8	19	1	21	4	22	8	28	5	31	6	32	2	25	0	0	8	17	136.986	37.5832	17.1521	10.3493	0	178.579	0	80.0032	23.2699	99.5969	4.22447	121.792	10.1121	80.9115	17.4552	114.343	10.2576	86.1863	11.7791	95.4719	5.62093	121.968	0
chr3_124047125_124047162_+	4	6	27	16	2	2	0	0	36	15	21	13	43	27	22	12	46	19	47	16	27	8	5	2	26	14	60.8828	28.1874	115.777	33.1178	48.3454	89.2897	0	0	104.714	78.6291	88.7139	75.3951	108.705	99.3005	48.0018	49.004	94.3702	52.8239	92.2698	47.736	75.8826	39.0299	35.9868
chr6_35830414_35830502_+	1	3	16	8	4	0	1	0	35	3	16	4	34	3	36	8	57	12	52	11	42	3	0	0	11	3	15.2207	14.0937	68.6086	16.5589	96.6908	0	124.347	0	101.806	15.7258	67.5915	23.1985	85.9526	11.0334	78.5484	32.6693	116.937	33.3624	102.086	32.8185	118.04	14.6362	0
chr9_24495898_24495903_-	3	1	6	0	0	0	0	0	1	0	3	1	3	2	3	0	5	0	5	4	0	1	0	0	0	2	45.6621	4.6979	25.7282	0	0	0	0	0	2.90874	0	12.6734	5.79962	7.58405	7.35559	6.5457	0	10.2576	0	9.81593	11.934	0	4.87874	0
chr6_58536126_58536140_-	5	11	51	33	13	0	4	6	79	18	57	18	84	12	89	14	99	21	96	24	77	14	0	0	34	7	76.1035	51.6769	218.69	68.3054	314.245	0	497.389	240.01	229.79	94.355	240.795	104.393	212.353	44.1335	194.189	57.1713	203.101	58.3843	188.466	71.604	216.406	68.3023	0
chr19_9815213_9815245_-	3	4	12	11	0	0	0	0	16	6	24	9	32	21	29	15	32	24	42	27	26	18	5	0	33	12	45.6621	18.7916	51.4564	22.7685	0	0	0	0	46.5398	31.4517	101.387	52.1966	80.8965	77.2337	63.2751	61.255	65.6488	66.7249	82.4538	80.5545	73.0721	87.8173	35.9868
chr1_95079021_95079022_+	6	2	3	3	0	0	0	3	1	7	1	4	0	3	2	6	2	8	0	7	0	3	0	1	3	12	91.3242	9.3958	12.8641	6.20959	0	0	0	120.005	2.90874	36.6936	4.22447	23.1985	0	11.0334	4.3638	24.502	4.10305	22.2416	0	20.8845	0	14.6362	0
chr1_64147025_64147026_-	0	0	5	0	0	0	0	0	3	4	1	4	5	7	5	6	4	8	7	11	3	2	0	0	2	4	0	0	21.4402	0	0	0	0	0	8.72621	20.9678	4.22447	23.1985	12.6401	25.7446	10.9095	24.502	8.2061	22.2416	13.7423	32.8185	8.4314	9.75748	0
chr3_98090685_98090722_+	11	3	1	3	0	1	0	1	0	15	1	12	2	11	3	9	1	19	2	12	1	10	0	0	3	9	167.428	14.0937	4.28804	6.20959	0	44.6449	0	40.0016	0	78.6291	4.22447	69.5955	5.05603	40.4558	6.5457	36.753	2.05153	52.8239	3.92637	35.802	2.81047	48.7874	0
chr4_144002515_144002517_+	18	16	10	9	2	6	2	15	12	59	9	44	20	71	16	39	14	65	21	68	17	51	3	10	15	52	273.973	75.1664	42.8804	18.6288	48.3454	267.869	248.694	600.024	34.9048	309.275	38.0202	255.183	50.5603	261.123	34.9104	159.263	28.7214	180.713	41.2269	202.878	47.7779	248.816	21.5921
chr2_77368553_77368619_+	2	1	2	0	0	0	0	0	1	1	1	1	5	6	4	1	9	2	7	0	6	4	0	0	6	3	30.4414	4.6979	8.57607	0	0	0	0	0	2.90874	5.24194	4.22447	5.79962	12.6401	22.0668	8.7276	4.08367	18.4637	5.56041	13.7423	0	16.8628	19.515	0
chr3_146551205_146551246_+	1	3	27	21	6	7	0	7	43	20	50	38	61	34	57	40	64	41	73	47	63	33	0	0	25	10	15.2207	14.0937	115.777	43.4671	145.036	312.514	0	280.011	125.076	104.839	211.224	220.386	154.209	125.045	124.368	163.347	131.298	113.988	143.313	140.224	177.059	160.998	0
chr3_50912338_50912340_+	0	0	0	1	2	0	0	0	1	0	4	1	1	0	2	0	0	0	3	1	2	0	1	0	22	7	0	0	0	2.06986	48.3454	0	0	0	2.90874	0	16.8979	5.79962	2.52802	0	4.3638	0	0	0	5.88956	2.9835	5.62093	0	7.19735
chr15_934905_934908_+	3	2	5	2	0	0	0	0	1	2	4	3	10	5	4	3	5	6	7	2	9	4	0	0	5	3	45.6621	9.3958	21.4402	4.13972	0	0	0	0	2.90874	10.4839	16.8979	17.3989	25.2802	18.389	8.7276	12.251	10.2576	16.6812	13.7423	5.967	25.2942	19.515	0
chr19_37459340_37459423_-	4	6	35	35	21	5	5	2	269	24	153	16	261	35	294	45	348	38	350	43	299	28	0	0	75	6	60.8828	28.1874	150.081	72.4452	507.626	223.224	621.736	80.0032	782.45	125.807	646.344	92.794	659.812	128.723	641.479	183.765	713.931	105.648	687.115	128.29	840.329	136.605	0
chr11_36828235_36828300_+	194	133	620	285	183	48	20	87	890	443	563	416	1133	546	908	390	1000	547	1132	628	884	393	124	46	591	250	2952.82	624.821	2658.58	589.911	4423.6	2142.95	2486.94	3480.14	2588.77	2322.18	2378.38	2412.64	2864.24	2008.08	1981.17	1592.63	2051.53	1520.77	2222.33	1873.64	2484.45	1917.34	892.472
chr4_118032285_118032374_-	12	19	70	54	33	10	4	3	153	43	86	26	158	46	224	81	207	91	215	66	154	54	1	0	57	7	182.648	89.2601	300.163	111.773	797.699	446.449	497.389	120.005	445.037	225.403	363.305	150.79	399.427	169.179	488.746	330.777	424.666	252.998	422.085	196.911	432.812	263.452	7.19735
chr8_113851117_113851127_+	0	1	6	1	1	0	0	1	15	6	13	2	25	3	15	4	26	2	49	4	19	4	0	0	7	2	0	4.6979	25.7282	2.06986	24.1727	0	0	40.0016	43.631	31.4517	54.9181	11.5992	63.2004	11.0334	32.7285	16.3347	53.3397	5.56041	96.1961	11.934	53.3988	19.515	0
chr10_57534376_57534378_-	2	0	1	0	2	0	0	0	4	2	6	0	8	0	21	3	11	7	17	3	6	3	0	0	11	0	30.4414	0	4.28804	0	48.3454	0	0	0	11.6349	10.4839	25.3468	0	20.2241	0	45.8199	12.251	22.5668	19.4614	33.3742	8.95049	16.8628	14.6362	0
chr14_61677899_61677977_-	4	0	1	1	2	1	0	0	0	1	0	0	2	4	1	0	0	7	1	2	1	0	0	0	3	4	60.8828	0	4.28804	2.06986	48.3454	44.6449	0	0	0	5.24194	0	0	5.05603	14.7112	2.1819	0	0	19.4614	1.96319	5.967	2.81047	0	0
chr10_56190323_56190329_+	8	3	17	25	3	0	3	5	32	12	35	20	38	23	35	20	41	26	44	30	41	16	0	0	18	6	121.766	14.0937	72.8966	51.7465	72.5181	0	373.042	200.008	93.0795	62.9033	147.857	115.992	96.0646	84.5893	76.3665	81.6733	84.1126	72.2853	86.3802	89.5049	115.229	78.0598	0
chr1_96291283_96291365_-	4	1	11	8	2	0	0	0	10	3	3	1	5	4	10	5	13	6	20	4	14	2	1	0	7	2	60.8828	4.6979	47.1684	16.5589	48.3454	0	0	0	29.0874	15.7258	12.6734	5.79962	12.6401	14.7112	21.819	20.4183	26.6698	16.6812	39.2637	11.934	39.3465	9.75748	7.19735
chr17_4462469_4462479_-	3	2	18	7	2	1	0	0	19	4	22	6	27	1	41	5	34	4	47	4	27	5	2	0	12	0	45.6621	9.3958	77.1846	14.489	48.3454	44.6449	0	0	55.266	20.9678	92.9384	34.7977	68.2565	3.6778	89.4579	20.4183	69.7519	11.1208	92.2698	11.934	75.8826	24.3937	14.3947
chr17_85654788_85654789_-	1	0	12	6	1	0	0	0	6	1	1	5	12	2	9	1	9	5	25	7	11	1	0	0	6	1	15.2207	0	51.4564	12.4192	24.1727	0	0	0	17.4524	5.24194	4.22447	28.9981	30.3362	7.35559	19.6371	4.08367	18.4637	13.901	49.0797	20.8845	30.9151	4.87874	0
chr20_1577859_1577861_-	7	4	5	1	0	1	0	0	1	2	2	3	2	8	1	6	0	7	2	11	1	2	0	1	1	6	106.545	18.7916	21.4402	2.06986	0	44.6449	0	0	2.90874	10.4839	8.44894	17.3989	5.05603	29.4224	2.1819	24.502	0	19.4614	3.92637	32.8185	2.81047	9.75748	0
chr3_108216369_108216395_+	2	0	0	0	3	0	0	1	12	10	16	12	18	19	30	23	22	24	22	26	14	23	1	0	13	4	30.4414	0	0	0	72.5181	0	0	40.0016	34.9048	52.4194	67.5915	69.5955	45.5043	69.8781	65.457	93.9243	45.1336	66.7249	43.1901	77.571	39.3465	112.211	7.19735
chr17_90572337_90572392_+	2	0	4	1	1	0	0	0	1	8	6	5	3	6	8	13	6	14	7	5	5	4	0	0	1	5	30.4414	0	17.1521	2.06986	24.1727	0	0	0	2.90874	41.9355	25.3468	28.9981	7.58405	22.0668	17.4552	53.0877	12.3092	38.9228	13.7423	14.9175	14.0523	19.515	0
chr10_90176545_90176564_+	0	0	7	1	0	0	0	0	9	2	13	1	11	3	23	2	13	4	19	3	13	2	0	0	3	1	0	0	30.0163	2.06986	0	0	0	0	26.1786	10.4839	54.9181	5.79962	27.8082	11.0334	50.1837	8.16733	26.6698	11.1208	37.3005	8.95049	36.536	9.75748	0
chr20_17985958_17986013_+	0	0	0	0	7	1	3	1	38	10	44	5	54	11	51	13	72	24	64	18	60	12	0	1	20	8	0	0	0	0	169.209	44.6449	373.042	40.0016	110.532	52.4194	185.877	28.9981	136.513	40.4558	111.277	53.0877	147.71	66.7249	125.644	53.703	168.628	58.5449	0
chr11_30919518_30919539_-	10	18	56	58	19	6	3	9	102	32	96	30	122	39	125	45	147	63	140	52	135	44	0	0	43	18	152.207	84.5622	240.13	120.052	459.281	267.869	373.042	360.014	296.691	167.742	405.549	173.989	308.418	143.434	272.738	183.765	301.574	175.153	274.846	155.142	379.413	214.665	0
chr10_72792556_72792615_-	15	25	125	88	8	4	0	3	114	64	46	48	143	66	64	38	123	82	182	128	139	66	18	4	117	49	228.311	117.448	536.004	182.148	193.382	178.579	0	120.005	331.596	335.484	194.326	278.382	361.506	242.735	139.642	155.179	252.338	227.977	357.3	381.888	390.655	321.997	129.552
chr4_84855653_84855654_+	1	2	14	5	0	0	0	0	10	6	5	6	5	10	11	2	8	6	15	7	8	6	0	2	15	3	15.2207	9.3958	60.0325	10.3493	0	0	0	0	29.0874	31.4517	21.1224	34.7977	12.6401	36.778	24.0009	8.16733	16.4122	16.6812	29.4478	20.8845	22.4837	29.2724	0
chr3_155509343_155509345_+	1	0	4	1	0	0	0	0	2	1	2	0	7	0	5	1	4	1	4	2	5	2	0	0	5	1	15.2207	0	17.1521	2.06986	0	0	0	0	5.81747	5.24194	8.44894	0	17.6961	0	10.9095	4.08367	8.2061	2.7802	7.85275	5.967	14.0523	9.75748	0
chr4_93729998_93729999_+	10	5	2	1	1	0	0	3	4	16	7	16	7	26	3	16	5	31	2	23	2	17	1	2	2	15	152.207	23.4895	8.57607	2.06986	24.1727	0	0	120.005	11.6349	83.8711	29.5713	92.794	17.6961	95.6227	6.5457	65.3387	10.2576	86.1863	3.92637	68.6205	5.62093	82.9386	7.19735
chr8_48103313_48103332_+	4	3	3	1	0	0	0	1	1	7	2	5	3	11	1	8	2	21	3	12	2	20	0	0	4	6	60.8828	14.0937	12.8641	2.06986	0	0	0	40.0016	2.90874	36.6936	8.44894	28.9981	7.58405	40.4558	2.1819	32.6693	4.10305	58.3843	5.88956	35.802	5.62093	97.5748	0
chr10_63126275_63126317_-	2	2	8	6	1	0	0	0	4	2	2	2	5	3	4	3	10	2	4	3	3	0	0	0	11	4	30.4414	9.3958	34.3043	12.4192	24.1727	0	0	0	11.6349	10.4839	8.44894	11.5992	12.6401	11.0334	8.7276	12.251	20.5153	5.56041	7.85275	8.95049	8.4314	0	0
chr16_9004927_9005001_-	0	0	0	0	5	2	2	1	24	7	30	6	35	9	43	9	54	14	37	13	31	8	0	0	16	4	0	0	0	0	120.863	89.2897	248.694	40.0016	69.8097	36.6936	126.734	34.7977	88.4806	33.1002	93.8217	36.753	110.782	38.9228	72.6379	38.7855	87.1244	39.0299	0
chr6_23990243_23990272_-	1	0	2	0	4	2	1	1	30	8	19	5	43	8	58	6	51	8	54	10	46	5	0	0	9	0	15.2207	0	8.57607	0	96.6908	89.2897	124.347	40.0016	87.2621	41.9355	80.265	28.9981	108.705	29.4224	126.55	24.502	104.628	22.2416	106.012	29.835	129.281	24.3937	0
chr3_3454363_3454365_-	5	3	2	2	0	2	0	0	0	7	1	8	1	7	0	5	0	10	1	7	0	4	0	0	4	11	76.1035	14.0937	8.57607	4.13972	0	89.2897	0	0	0	36.6936	4.22447	46.397	2.52802	25.7446	0	20.4183	0	27.802	1.96319	20.8845	0	19.515	0
chr1_148968995_148969072_+	2	4	16	10	4	0	0	0	30	14	20	13	29	6	33	10	31	15	54	12	36	15	0	0	25	4	30.4414	18.7916	68.6086	20.6986	96.6908	0	0	0	87.2621	73.3872	84.4894	75.3951	73.3125	22.0668	72.0027	40.8367	63.5973	41.703	106.012	35.802	101.177	73.1811	0
chr10_71015634_71015685_+	2	1	3	0	1	0	0	0	1	2	1	2	4	4	1	3	2	3	3	1	3	0	0	0	4	2	30.4414	4.6979	12.8641	0	24.1727	0	0	0	2.90874	10.4839	4.22447	11.5992	10.1121	14.7112	2.1819	12.251	4.10305	8.34061	5.88956	2.9835	8.4314	0	0
chr13_96318746_96318747_+	1	2	8	2	0	0	0	0	8	1	3	1	5	2	3	1	3	3	8	6	5	5	0	0	5	4	15.2207	9.3958	34.3043	4.13972	0	0	0	0	23.2699	5.24194	12.6734	5.79962	12.6401	7.35559	6.5457	4.08367	6.15458	8.34061	15.7055	17.901	14.0523	24.3937	0
chr15_25781062_25781149_-	25	29	62	37	6	2	1	3	51	54	54	41	55	79	68	65	74	82	83	88	65	66	12	0	41	24	380.518	136.239	265.858	76.5849	145.036	89.2897	124.347	120.005	148.346	283.065	228.121	237.785	139.041	290.546	148.369	265.438	151.813	227.977	162.944	262.548	182.68	321.997	86.3682
chr3_78844741_78844802_-	9	11	46	49	11	7	2	1	82	14	55	18	92	26	114	33	105	34	109	53	73	31	1	0	28	10	136.986	51.6769	197.25	101.423	265.9	312.514	248.694	40.0016	238.516	73.3872	232.346	104.393	232.578	95.6227	248.737	134.761	215.41	94.5269	213.987	158.125	205.164	151.241	7.19735
chr8_73819582_73819585_+	3	2	9	3	0	0	0	2	5	2	3	1	16	5	14	5	18	8	8	2	4	2	0	0	2	1	45.6621	9.3958	38.5923	6.20959	0	0	0	80.0032	14.5437	10.4839	12.6734	5.79962	40.4483	18.389	30.5466	20.4183	36.9275	22.2416	15.7055	5.967	11.2419	9.75748	0
chr10_46072960_46072967_+	8	11	43	29	3	1	1	0	25	11	11	7	31	15	15	5	24	24	41	22	26	12	5	2	35	10	121.766	51.6769	184.386	60.026	72.5181	44.6449	124.347	0	72.7184	57.6614	46.4692	40.5974	78.3685	55.1669	32.7285	20.4183	49.2366	66.7249	80.4906	65.637	73.0721	58.5449	35.9868
chr5_163341003_163341043_+	4	3	13	6	1	0	0	1	8	5	4	13	14	11	15	3	9	11	14	17	17	9	1	1	6	3	60.8828	14.0937	55.7445	12.4192	24.1727	0	0	40.0016	23.2699	26.2097	16.8979	75.3951	35.3922	40.4558	32.7285	12.251	18.4637	30.5822	27.4846	50.7195	47.7779	43.9087	7.19735
chr10_7137154_7137248_-	18	31	71	79	24	7	4	2	118	42	96	60	132	74	193	101	194	109	159	113	145	56	6	0	99	51	273.973	145.635	304.451	163.519	580.145	312.514	497.389	80.0032	343.231	220.162	405.549	347.977	333.698	272.157	421.107	412.45	397.996	303.042	312.147	337.135	407.517	273.209	43.1841
chr2_195936174_195936244_+	0	1	18	10	0	0	0	0	20	3	11	0	13	3	30	4	26	3	31	3	28	5	0	0	10	2	0	4.6979	77.1846	20.6986	0	0	0	0	58.1747	15.7258	46.4692	0	32.8642	11.0334	65.457	16.3347	53.3397	8.34061	60.8588	8.95049	78.693	24.3937	0
chr2_224282403_224282472_-	4	2	18	13	1	0	0	1	19	4	13	6	18	11	19	6	29	18	32	8	13	9	2	2	15	8	60.8828	9.3958	77.1846	26.9082	24.1727	0	0	40.0016	55.266	20.9678	54.9181	34.7977	45.5043	40.4558	41.4561	24.502	59.4943	50.0436	62.822	23.868	36.536	43.9087	14.3947
chr6_109965769_109965840_+	0	0	6	1	0	0	0	0	4	1	2	1	4	4	8	1	2	3	4	4	3	1	0	0	4	2	0	0	25.7282	2.06986	0	0	0	0	11.6349	5.24194	8.44894	5.79962	10.1121	14.7112	17.4552	4.08367	4.10305	8.34061	7.85275	11.934	8.4314	4.87874	0
chr8_79934479_79934540_+	3	3	9	4	2	1	0	1	10	9	5	7	9	6	3	6	5	11	9	9	7	7	2	2	13	7	45.6621	14.0937	38.5923	8.27945	48.3454	44.6449	0	40.0016	29.0874	47.1775	21.1224	40.5974	22.7522	22.0668	6.5457	24.502	10.2576	30.5822	17.6687	26.8515	19.6733	34.1512	14.3947
chr5_156718749_156718831_+	7	2	1	1	0	2	0	0	1	9	1	6	2	13	0	5	2	11	1	8	0	14	0	0	1	5	106.545	9.3958	4.28804	2.06986	0	89.2897	0	0	2.90874	47.1775	4.22447	34.7977	5.05603	47.8113	0	20.4183	4.10305	30.5822	1.96319	23.868	0	68.3023	0
chr2_77313136_77313206_+	1	0	2	0	0	1	0	0	1	4	1	3	1	6	5	1	6	6	5	3	3	2	0	0	6	1	15.2207	0	8.57607	0	0	44.6449	0	0	2.90874	20.9678	4.22447	17.3989	2.52802	22.0668	10.9095	4.08367	12.3092	16.6812	9.81593	8.95049	8.4314	9.75748	0
chr8_49252314_49252316_+	3	1	5	0	0	0	0	1	3	5	3	9	8	15	5	13	5	13	12	17	5	11	0	1	1	5	45.6621	4.6979	21.4402	0	0	0	0	40.0016	8.72621	26.2097	12.6734	52.1966	20.2241	55.1669	10.9095	53.0877	10.2576	36.1426	23.5582	50.7195	14.0523	53.6661	0
chrX_73108014_73108028_+	5	7	28	19	6	0	1	0	45	10	37	20	49	17	70	38	64	21	81	43	47	15	5	0	29	8	76.1035	32.8853	120.065	39.3274	145.036	0	124.347	0	130.893	52.4194	156.305	115.992	123.873	62.5225	152.733	155.179	131.298	58.3843	159.018	128.29	132.092	73.1811	35.9868
chr18_77118101_77118176_+	2	1	5	2	0	0	0	0	7	1	7	2	6	0	6	0	9	2	4	2	4	0	0	0	9	1	30.4414	4.6979	21.4402	4.13972	0	0	0	0	20.3611	5.24194	29.5713	11.5992	15.1681	0	13.0914	0	18.4637	5.56041	7.85275	5.967	11.2419	0	0
chr20_6870821_6870916_-	5	8	28	27	7	3	1	1	64	16	49	16	83	24	121	25	96	39	120	39	87	20	1	0	46	9	76.1035	37.5832	120.065	55.8863	169.209	133.935	124.347	40.0016	186.159	83.8711	206.999	92.794	209.825	88.2671	264.01	102.092	196.947	108.428	235.582	116.356	244.51	97.5748	7.19735
chr1_207344281_207344282_+	2	0	3	1	0	0	0	0	3	1	2	2	1	2	3	0	2	4	5	1	4	2	0	0	5	1	30.4414	0	12.8641	2.06986	0	0	0	0	8.72621	5.24194	8.44894	11.5992	2.52802	7.35559	6.5457	0	4.10305	11.1208	9.81593	2.9835	11.2419	9.75748	0
chr8_73812521_73812600_+	3	2	21	18	0	0	0	0	21	7	8	5	30	5	21	7	26	15	31	10	17	6	0	1	16	8	45.6621	9.3958	90.0488	37.2575	0	0	0	0	61.0834	36.6936	33.7958	28.9981	75.8405	18.389	45.8199	28.5857	53.3397	41.703	60.8588	29.835	47.7779	29.2724	0
chr8_19669484_19669554_+	19	36	113	85	21	9	3	10	118	42	107	55	131	68	140	55	148	73	184	95	153	72	6	2	90	30	289.193	169.124	484.548	175.938	507.626	401.804	373.042	400.016	343.231	220.162	452.018	318.979	331.17	250.09	305.466	224.602	303.626	202.955	361.226	283.432	430.001	351.269	43.1841
chr3_48292753_48292823_-	7	4	3	2	0	0	0	2	6	21	6	17	8	34	10	29	3	36	6	39	4	28	0	0	4	5	106.545	18.7916	12.8641	4.13972	0	0	0	80.0032	17.4524	110.081	25.3468	98.5936	20.2241	125.045	21.819	118.426	6.15458	100.087	11.7791	116.356	11.2419	136.605	0
chr10_83099885_83099949_-	2	0	1	0	1	1	0	0	5	10	1	6	1	15	3	9	3	16	0	18	1	13	0	1	1	12	30.4414	0	4.28804	0	24.1727	44.6449	0	0	14.5437	52.4194	4.22447	34.7977	2.52802	55.1669	6.5457	36.753	6.15458	44.4832	0	53.703	2.81047	63.4236	0
chr4_166802096_166802097_+	3	4	16	9	4	0	0	0	25	9	25	8	41	13	26	12	33	20	42	24	36	12	1	0	8	5	45.6621	18.7916	68.6086	18.6288	96.6908	0	0	0	72.7184	47.1775	105.612	46.397	103.649	47.8113	56.7294	49.004	67.7004	55.6041	82.4538	71.604	101.177	58.5449	7.19735
chr13_76835514_76835550_-	0	0	8	5	0	2	1	0	16	0	9	3	18	1	56	3	42	7	30	3	19	3	0	0	14	3	0	0	34.3043	10.3493	0	89.2897	124.347	0	46.5398	0	38.0202	17.3989	45.5043	3.6778	122.186	12.251	86.1641	19.4614	58.8956	8.95049	53.3988	14.6362	0
chr18_73811160_73811250_+	4	5	18	10	2	1	3	1	30	19	35	22	43	26	48	31	42	27	83	53	60	26	3	2	20	8	60.8828	23.4895	77.1846	20.6986	48.3454	44.6449	373.042	40.0016	87.2621	99.5969	147.857	127.592	108.705	95.6227	104.731	126.594	86.1641	75.0655	162.944	158.125	168.628	126.847	21.5921
chr9_14424241_14424244_-	5	2	8	4	2	0	1	1	7	3	7	5	6	8	11	8	11	21	15	18	16	14	0	0	2	1	76.1035	9.3958	34.3043	8.27945	48.3454	0	124.347	40.0016	20.3611	15.7258	29.5713	28.9981	15.1681	29.4224	24.0009	32.6693	22.5668	58.3843	29.4478	53.703	44.9674	68.3023	0
chr3_114947484_114947525_-	3	3	19	21	2	0	0	0	37	10	23	4	35	7	51	9	40	9	46	12	31	8	0	0	26	7	45.6621	14.0937	81.4727	43.4671	48.3454	0	0	0	107.623	52.4194	97.1628	23.1985	88.4806	25.7446	111.277	36.753	82.061	25.0218	90.3066	35.802	87.1244	39.0299	0
chr4_180063921_180064016_-	0	3	17	6	1	0	1	1	19	8	2	7	12	7	19	9	27	9	26	13	16	12	2	0	18	4	0	14.0937	72.8966	12.4192	24.1727	0	124.347	40.0016	55.266	41.9355	8.44894	40.5974	30.3362	25.7446	41.4561	36.753	55.3912	25.0218	51.0428	38.7855	44.9674	58.5449	14.3947
chr8_73815285_73815369_+	8	6	25	16	0	0	0	3	43	14	20	8	49	17	47	11	50	24	36	18	26	11	7	3	38	8	121.766	28.1874	107.201	33.1178	0	0	0	120.005	125.076	73.3872	84.4894	46.397	123.873	62.5225	102.549	44.9203	102.576	66.7249	70.6747	53.703	73.0721	53.6661	50.3815
chr4_160595828_160595904_-	0	0	13	4	1	0	0	0	19	4	7	1	13	0	12	5	26	5	15	9	17	7	0	0	3	1	0	0	55.7445	8.27945	24.1727	0	0	0	55.266	20.9678	29.5713	5.79962	32.8642	0	26.1828	20.4183	53.3397	13.901	29.4478	26.8515	47.7779	34.1512	0
chr5_25446208_25446271_-	4	7	50	44	15	2	1	5	61	17	48	12	86	26	77	14	71	22	90	26	61	18	5	0	48	8	60.8828	32.8853	214.402	91.0739	362.59	89.2897	124.347	200.008	177.433	89.113	202.775	69.5955	217.409	95.6227	168.006	57.1713	145.658	61.1645	176.687	77.571	171.438	87.8173	35.9868
chr4_143919324_143919325_+	2	1	3	3	0	0	0	3	3	5	4	5	11	9	2	5	3	6	5	13	3	6	2	0	11	12	30.4414	4.6979	12.8641	6.20959	0	0	0	120.005	8.72621	26.2097	16.8979	28.9981	27.8082	33.1002	4.3638	20.4183	6.15458	16.6812	9.81593	38.7855	8.4314	29.2724	14.3947
chr19_36742059_36742101_-	2	5	3	3	5	3	2	10	29	21	32	25	37	24	46	30	54	35	45	37	40	26	0	0	45	17	30.4414	23.4895	12.8641	6.20959	120.863	133.935	248.694	400.016	84.3533	110.081	135.183	144.991	93.5366	88.2671	100.367	122.51	110.782	97.3071	88.3434	110.389	112.419	126.847	0
chr16_80623508_80623564_-	2	2	5	0	8	3	3	2	70	8	44	5	57	15	61	10	100	16	89	7	70	11	0	0	11	1	30.4414	9.3958	21.4402	0	193.382	133.935	373.042	80.0032	203.611	41.9355	185.877	28.9981	144.097	55.1669	133.096	40.8367	205.153	44.4832	174.724	20.8845	196.733	53.6661	0
chr10_16889488_16889574_-	2	2	4	3	1	0	1	3	6	5	6	10	9	11	37	25	30	21	14	16	15	22	0	0	12	5	30.4414	9.3958	17.1521	6.20959	24.1727	0	124.347	120.005	17.4524	26.2097	25.3468	57.9962	22.7522	40.4558	80.7303	102.092	61.5458	58.3843	27.4846	47.736	42.157	107.332	0
chr1_212758446_212758546_-	3	0	2	0	0	0	0	1	0	3	1	4	5	8	2	2	1	11	4	6	1	7	0	0	2	1	45.6621	0	8.57607	0	0	0	0	40.0016	0	15.7258	4.22447	23.1985	12.6401	29.4224	4.3638	8.16733	2.05153	30.5822	7.85275	17.901	2.81047	34.1512	0
chr13_35722334_35722387_-	5	1	1	0	0	0	0	1	0	2	1	3	0	9	2	2	1	7	3	7	1	6	0	0	1	3	76.1035	4.6979	4.28804	0	0	0	0	40.0016	0	10.4839	4.22447	17.3989	0	33.1002	4.3638	8.16733	2.05153	19.4614	5.88956	20.8845	2.81047	29.2724	0
chr4_143878193_143878194_+	5	3	6	5	0	0	0	1	9	4	6	6	10	8	4	7	7	11	8	11	7	11	0	1	9	5	76.1035	14.0937	25.7282	10.3493	0	0	0	40.0016	26.1786	20.9678	25.3468	34.7977	25.2802	29.4224	8.7276	28.5857	14.3607	30.5822	15.7055	32.8185	19.6733	53.6661	0
chr19_54703226_54703309_+	2	8	37	16	3	2	2	3	41	13	38	13	37	17	44	18	65	24	70	30	49	13	0	0	24	6	30.4414	37.5832	158.657	33.1178	72.5181	89.2897	248.694	120.005	119.258	68.1452	160.53	75.3951	93.5366	62.5225	96.0036	73.506	133.349	66.7249	137.423	89.5049	137.713	63.4236	0
chr7_73481150_73481228_-	1	1	8	6	1	0	0	1	6	7	4	2	4	2	1	2	9	2	8	3	6	0	0	0	10	6	15.2207	4.6979	34.3043	12.4192	24.1727	0	0	40.0016	17.4524	36.6936	16.8979	11.5992	10.1121	7.35559	2.1819	8.16733	18.4637	5.56041	15.7055	8.95049	16.8628	0	0
chr3_124016563_124016619_+	2	0	10	4	0	0	0	0	6	0	7	0	9	6	12	2	11	8	11	10	11	4	2	1	10	2	30.4414	0	42.8804	8.27945	0	0	0	0	17.4524	0	29.5713	0	22.7522	22.0668	26.1828	8.16733	22.5668	22.2416	21.595	29.835	30.9151	19.515	14.3947
chr10_67716660_67716753_+	1	1	7	1	0	0	0	1	4	3	5	3	14	3	3	3	9	3	11	1	3	1	0	1	6	2	15.2207	4.6979	30.0163	2.06986	0	0	0	40.0016	11.6349	15.7258	21.1224	17.3989	35.3922	11.0334	6.5457	12.251	18.4637	8.34061	21.595	2.9835	8.4314	4.87874	0
chr13_68767963_68767966_+	1	0	2	0	1	0	0	0	3	1	1	2	7	8	14	3	8	12	8	5	1	2	0	0	4	2	15.2207	0	8.57607	0	24.1727	0	0	0	8.72621	5.24194	4.22447	11.5992	17.6961	29.4224	30.5466	12.251	16.4122	33.3624	15.7055	14.9175	2.81047	9.75748	0
chr8_44976071_44976140_-	6	4	2	1	0	0	0	0	1	5	1	7	3	13	1	7	1	8	3	12	1	7	0	0	4	7	91.3242	18.7916	8.57607	2.06986	0	0	0	0	2.90874	26.2097	4.22447	40.5974	7.58405	47.8113	2.1819	28.5857	2.05153	22.2416	5.88956	35.802	2.81047	34.1512	0
chr17_52329248_52329339_-	1	2	8	1	1	0	0	1	17	10	5	9	17	9	13	7	23	10	15	9	12	12	1	0	6	4	15.2207	9.3958	34.3043	2.06986	24.1727	0	0	40.0016	49.4485	52.4194	21.1224	52.1966	42.9763	33.1002	28.3647	28.5857	47.1851	27.802	29.4478	26.8515	33.7256	58.5449	7.19735
chr18_56919322_56919415_+	1	2	3	1	1	0	0	1	6	7	2	4	3	10	3	9	8	9	4	11	6	9	0	0	10	6	15.2207	9.3958	12.8641	2.06986	24.1727	0	0	40.0016	17.4524	36.6936	8.44894	23.1985	7.58405	36.778	6.5457	36.753	16.4122	25.0218	7.85275	32.8185	16.8628	43.9087	0
chr20_1554335_1554338_-	11	1	4	6	1	6	0	0	4	11	2	6	5	24	2	11	2	22	2	27	2	8	2	2	7	17	167.428	4.6979	17.1521	12.4192	24.1727	267.869	0	0	11.6349	57.6614	8.44894	34.7977	12.6401	88.2671	4.3638	44.9203	4.10305	61.1645	3.92637	80.5545	5.62093	39.0299	14.3947
chr4_182663268_182663269_-	3	1	7	6	3	0	0	1	15	10	5	6	14	11	12	11	13	9	12	11	12	5	2	1	16	5	45.6621	4.6979	30.0163	12.4192	72.5181	0	0	40.0016	43.631	52.4194	21.1224	34.7977	35.3922	40.4558	26.1828	44.9203	26.6698	25.0218	23.5582	32.8185	33.7256	24.3937	14.3947
chr1_158885743_158885780_+	1	2	12	5	0	0	0	0	13	7	4	6	12	12	10	4	13	16	10	18	8	13	2	0	10	4	15.2207	9.3958	51.4564	10.3493	0	0	0	0	37.8136	36.6936	16.8979	34.7977	30.3362	44.1335	21.819	16.3347	26.6698	44.4832	19.6319	53.703	22.4837	63.4236	14.3947
chr1_204851541_204851542_+	1	0	2	0	0	0	0	1	1	1	0	1	1	1	1	2	0	3	0	2	0	1	0	0	3	3	15.2207	0	8.57607	0	0	0	0	40.0016	2.90874	5.24194	0	5.79962	2.52802	3.6778	2.1819	8.16733	0	8.34061	0	5.967	0	4.87874	0
chr15_59790792_59790871_-	0	0	5	1	0	0	0	0	7	3	1	0	5	1	0	1	6	1	5	3	1	2	0	0	6	1	0	0	21.4402	2.06986	0	0	0	0	20.3611	15.7258	4.22447	0	12.6401	3.6778	0	4.08367	12.3092	2.7802	9.81593	8.95049	2.81047	9.75748	0
chr19_22853626_22853710_+	2	3	20	26	7	3	0	1	90	10	63	11	92	11	105	14	98	15	153	23	89	22	0	0	82	10	30.4414	14.0937	85.7607	53.8164	169.209	133.935	0	40.0016	261.786	52.4194	266.142	63.7959	232.578	40.4558	229.1	57.1713	201.05	41.703	300.368	68.6205	250.131	107.332	0
chr3_9002032_9002033_+	1	2	4	1	0	0	0	0	6	0	5	0	4	5	2	0	4	3	6	3	5	4	0	0	14	3	15.2207	9.3958	17.1521	2.06986	0	0	0	0	17.4524	0	21.1224	0	10.1121	18.389	4.3638	0	8.2061	8.34061	11.7791	8.95049	14.0523	19.515	0
chr7_9936606_9936618_+	0	0	0	0	11	2	3	13	46	16	59	14	62	13	71	14	60	20	70	20	66	18	0	0	17	3	0	0	0	0	265.9	89.2897	373.042	520.021	133.802	83.8711	249.244	81.1947	156.737	47.8113	154.915	57.1713	123.092	55.6041	137.423	59.67	185.491	87.8173	0
chr1_204828149_204828191_+	1	1	3	0	0	0	0	4	1	3	0	4	2	5	3	4	1	5	5	2	1	2	0	0	5	3	15.2207	4.6979	12.8641	0	0	0	0	160.006	2.90874	15.7258	0	23.1985	5.05603	18.389	6.5457	16.3347	2.05153	13.901	9.81593	5.967	2.81047	9.75748	0
chr5_36502618_36502691_-	7	10	45	48	9	1	2	1	119	22	77	25	133	24	147	31	159	32	182	48	146	26	4	0	49	10	106.545	46.979	192.962	99.3534	217.554	44.6449	248.694	40.0016	346.14	115.323	325.284	144.991	336.226	88.2671	320.739	126.594	326.193	88.9665	357.3	143.208	410.328	126.847	28.7894
chr10_63387981_63388061_-	3	1	7	5	0	0	0	0	8	7	5	2	9	7	9	3	12	4	10	7	4	1	0	0	12	1	45.6621	4.6979	30.0163	10.3493	0	0	0	0	23.2699	36.6936	21.1224	11.5992	22.7522	25.7446	19.6371	12.251	24.6183	11.1208	19.6319	20.8845	11.2419	4.87874	0
chr1_204725034_204725127_+	1	2	3	1	0	0	0	2	4	10	4	3	6	7	4	10	8	17	6	10	5	7	0	1	12	8	15.2207	9.3958	12.8641	2.06986	0	0	0	80.0032	11.6349	52.4194	16.8979	17.3989	15.1681	25.7446	8.7276	40.8367	16.4122	47.2634	11.7791	29.835	14.0523	34.1512	0
chr1_82624589_82624656_-	12	10	13	9	1	0	0	1	16	14	7	20	13	22	17	14	14	27	23	26	15	17	3	1	14	9	182.648	46.979	55.7445	18.6288	24.1727	0	0	40.0016	46.5398	73.3872	29.5713	115.992	32.8642	80.9115	37.0923	57.1713	28.7214	75.0655	45.1533	77.571	42.157	82.9386	21.5921
chr12_42602009_42602025_-	6	12	57	54	7	4	1	0	68	16	62	18	91	20	110	33	115	34	121	44	87	24	0	0	39	12	91.3242	56.3748	244.418	111.773	169.209	178.579	124.347	0	197.794	83.8711	261.917	104.393	230.05	73.5559	240.009	134.761	235.926	94.5269	237.546	131.274	244.51	117.09	0
chr19_9810551_9810558_-	3	1	6	3	1	0	0	0	4	2	4	5	6	5	5	6	7	7	7	7	4	3	1	0	4	5	45.6621	4.6979	25.7282	6.20959	24.1727	0	0	0	11.6349	10.4839	16.8979	28.9981	15.1681	18.389	10.9095	24.502	14.3607	19.4614	13.7423	20.8845	11.2419	14.6362	7.19735
chr9_62208131_62208202_+	18	12	8	7	6	3	0	0	7	63	12	46	11	90	9	76	12	103	14	78	7	65	1	3	3	26	273.973	56.3748	34.3043	14.489	145.036	133.935	0	0	20.3611	330.242	50.6937	266.783	27.8082	331.002	19.6371	310.359	24.6183	286.361	27.4846	232.713	19.6733	317.118	7.19735
chr1_158273936_158274034_+	7	5	15	17	2	0	1	0	5	3	6	1	9	3	12	2	17	7	14	4	9	3	3	2	25	11	106.545	23.4895	64.3205	35.1877	48.3454	0	124.347	0	14.5437	15.7258	25.3468	5.79962	22.7522	11.0334	26.1828	8.16733	34.8759	19.4614	27.4846	11.934	25.2942	14.6362	21.5921
chr9_82206168_82206198_+	1	1	12	8	0	0	0	0	6	0	5	1	4	1	4	0	10	2	10	0	6	0	1	0	16	1	15.2207	4.6979	51.4564	16.5589	0	0	0	0	17.4524	0	21.1224	5.79962	10.1121	3.6778	8.7276	0	20.5153	5.56041	19.6319	0	16.8628	0	7.19735
chr20_1554382_1554384_-	4	1	0	0	0	0	0	1	0	4	0	3	1	3	0	3	0	5	0	0	1	4	0	1	2	11	60.8828	4.6979	0	0	0	0	0	40.0016	0	20.9678	0	17.3989	2.52802	11.0334	0	12.251	0	13.901	0	0	2.81047	19.515	0
chr2_191045448_191045450_-	0	0	0	0	1	0	0	0	0	0	1	0	0	0	0	0	0	3	0	1	1	0	1	0	22	5	0	0	0	0	24.1727	0	0	0	0	0	4.22447	0	0	0	0	0	0	8.34061	0	2.9835	2.81047	0	7.19735
chr1_233065359_233065453_+	6	6	6	1	0	0	0	0	1	23	5	22	2	30	4	21	2	25	5	51	2	30	0	3	3	15	91.3242	28.1874	25.7282	2.06986	0	0	0	0	2.90874	120.565	21.1224	127.592	5.05603	110.334	8.7276	85.757	4.10305	69.5051	9.81593	152.158	5.62093	146.362	0
chr1_207341594_207341595_+	3	4	15	9	0	1	0	0	5	4	3	2	7	5	4	2	5	9	11	6	7	4	0	0	8	3	45.6621	18.7916	64.3205	18.6288	0	44.6449	0	0	14.5437	20.9678	12.6734	11.5992	17.6961	18.389	8.7276	8.16733	10.2576	25.0218	21.595	17.901	19.6733	19.515	0
chr1_207356307_207356309_+	2	0	3	2	1	0	0	0	3	2	2	2	6	3	2	1	7	6	6	4	4	1	0	0	6	3	30.4414	0	12.8641	4.13972	24.1727	0	0	0	8.72621	10.4839	8.44894	11.5992	15.1681	11.0334	4.3638	4.08367	14.3607	16.6812	11.7791	11.934	11.2419	4.87874	0
chr1_99805571_99805580_+	3	1	3	1	0	0	0	0	0	7	1	5	1	5	1	5	2	7	6	18	1	2	0	0	2	4	45.6621	4.6979	12.8641	2.06986	0	0	0	0	0	36.6936	4.22447	28.9981	2.52802	18.389	2.1819	20.4183	4.10305	19.4614	11.7791	53.703	2.81047	9.75748	0
chr19_37036323_37036413_+	1	0	5	3	0	0	0	0	4	0	5	0	6	0	9	0	5	0	4	1	6	2	0	0	11	1	15.2207	0	21.4402	6.20959	0	0	0	0	11.6349	0	21.1224	0	15.1681	0	19.6371	0	10.2576	0	7.85275	2.9835	16.8628	9.75748	0
chr18_28611052_28611053_+	2	1	7	2	0	0	0	0	0	0	0	0	1	0	1	1	3	0	6	3	3	2	0	0	2	2	30.4414	4.6979	30.0163	4.13972	0	0	0	0	0	0	0	0	2.52802	0	2.1819	4.08367	6.15458	0	11.7791	8.95049	8.4314	9.75748	0
chr2_235670010_235670083_+	2	1	18	11	1	2	1	0	50	7	14	3	53	8	58	5	42	12	78	7	45	3	2	0	13	1	30.4414	4.6979	77.1846	22.7685	24.1727	89.2897	124.347	0	145.437	36.6936	59.1426	17.3989	133.985	29.4224	126.55	20.4183	86.1641	33.3624	153.129	20.8845	126.471	14.6362	14.3947
chr1_207337735_207337747_+	3	5	10	5	0	0	0	3	21	15	14	19	24	26	23	11	16	18	21	28	20	17	4	2	21	15	45.6621	23.4895	42.8804	10.3493	0	0	0	120.005	61.0834	78.6291	59.1426	110.193	60.6724	95.6227	50.1837	44.9203	32.8244	50.0436	41.2269	83.538	56.2093	82.9386	28.7894
chr10_105373643_105373675_-	1	0	5	2	0	0	0	1	2	5	5	2	5	9	10	5	5	7	4	13	10	6	0	0	2	9	15.2207	0	21.4402	4.13972	0	0	0	40.0016	5.81747	26.2097	21.1224	11.5992	12.6401	33.1002	21.819	20.4183	10.2576	19.4614	7.85275	38.7855	28.1047	29.2724	0
chr10_108253427_108253460_-	6	11	23	22	2	6	3	3	42	18	37	12	52	23	66	29	57	36	55	36	57	17	0	0	24	17	91.3242	51.6769	98.6248	45.537	48.3454	267.869	373.042	120.005	122.167	94.355	156.305	69.5955	131.457	84.5893	144.005	118.426	116.937	100.087	107.975	107.406	160.197	82.9386	0
chr9_62203183_62203232_+	12	10	7	7	3	5	0	2	8	41	7	38	9	73	7	47	15	70	9	66	7	47	1	2	7	22	182.648	46.979	30.0163	14.489	72.5181	223.224	0	80.0032	23.2699	214.92	29.5713	220.386	22.7522	268.479	15.2733	191.932	30.7729	194.614	17.6687	196.911	19.6733	229.301	7.19735
chr4_120580228_120580308_-	10	21	6	6	24	31	4	17	110	211	68	196	106	280	127	270	142	325	153	336	97	263	0	0	53	67	152.207	98.6559	25.7282	12.4192	580.145	1383.99	497.389	680.027	319.961	1106.05	287.264	1136.73	267.97	1029.78	277.101	1102.59	291.317	903.566	300.368	1002.46	272.615	1283.11	0
chr14_84363320_84363410_-	0	0	3	1	0	0	0	0	1	4	4	1	7	2	8	1	2	3	8	3	5	1	0	0	6	6	0	0	12.8641	2.06986	0	0	0	0	2.90874	20.9678	16.8979	5.79962	17.6961	7.35559	17.4552	4.08367	4.10305	8.34061	15.7055	8.95049	14.0523	4.87874	0
chr3_103398037_103398116_-	2	0	4	0	0	0	0	0	3	3	0	1	5	0	4	1	1	5	7	2	1	0	0	0	2	0	30.4414	0	17.1521	0	0	0	0	0	8.72621	15.7258	0	5.79962	12.6401	0	8.7276	4.08367	2.05153	13.901	13.7423	5.967	2.81047	0	0
chr10_68281871_68281953_-	2	3	6	2	7	0	1	0	12	9	23	4	20	9	34	14	23	16	52	30	25	14	0	0	6	5	30.4414	14.0937	25.7282	4.13972	169.209	0	124.347	0	34.9048	47.1775	97.1628	23.1985	50.5603	33.1002	74.1846	57.1713	47.1851	44.4832	102.086	89.5049	70.2616	68.3023	0
chr14_110245569_110245597_-	2	7	28	2	10	8	1	5	95	27	93	32	131	35	114	46	134	40	146	71	105	32	1	1	13	7	30.4414	32.8853	120.065	4.13972	241.727	357.159	124.347	200.008	276.33	141.532	392.876	185.588	331.17	128.723	248.737	187.849	274.905	111.208	286.625	211.828	295.099	156.12	7.19735
chr4_164158230_164158286_-	0	2	18	6	0	0	0	0	12	7	5	8	16	4	6	1	7	5	14	11	14	3	0	2	17	6	0	9.3958	77.1846	12.4192	0	0	0	0	34.9048	36.6936	21.1224	46.397	40.4483	14.7112	13.0914	4.08367	14.3607	13.901	27.4846	32.8185	39.3465	14.6362	0
chr1_232624648_232624654_+	5	7	27	16	8	4	1	2	55	12	46	16	59	19	96	23	76	25	91	24	74	16	0	0	18	2	76.1035	32.8853	115.777	33.1178	193.382	178.579	124.347	80.0032	159.98	62.9033	194.326	92.794	149.153	69.8781	209.462	93.9243	155.916	69.5051	178.65	71.604	207.974	78.0598	0
chr4_149658737_149658739_-	6	5	3	0	0	0	0	0	2	9	0	13	3	13	2	15	2	24	0	16	0	19	0	1	1	13	91.3242	23.4895	12.8641	0	0	0	0	0	5.81747	47.1775	0	75.3951	7.58405	47.8113	4.3638	61.255	4.10305	66.7249	0	47.736	0	92.696	0
chr7_138369345_138369444_-	1	1	10	3	0	0	0	0	5	3	0	4	7	1	6	2	3	5	6	2	3	1	1	0	5	2	15.2207	4.6979	42.8804	6.20959	0	0	0	0	14.5437	15.7258	0	23.1985	17.6961	3.6778	13.0914	8.16733	6.15458	13.901	11.7791	5.967	8.4314	4.87874	7.19735
chr8_112753583_112753603_+	6	1	2	1	1	0	0	0	0	6	4	6	1	7	1	7	0	9	0	12	0	11	0	1	3	4	91.3242	4.6979	8.57607	2.06986	24.1727	0	0	0	0	31.4517	16.8979	34.7977	2.52802	25.7446	2.1819	28.5857	0	25.0218	0	35.802	0	53.6661	0
chr2_182303959_182304033_+	34	43	221	197	63	16	6	13	445	133	281	75	444	128	464	162	500	206	524	208	462	158	18	3	163	38	517.504	202.01	947.656	407.763	1522.88	714.318	746.083	520.021	1294.39	697.178	1187.08	434.972	1122.44	470.758	1012.4	661.554	1025.76	572.722	1028.71	620.568	1298.43	770.841	129.552
chr9_36238212_36238310_+	4	6	6	11	49	19	20	56	196	129	175	107	194	114	193	139	209	156	262	153	228	142	0	0	60	27	60.8828	28.1874	25.7282	22.7685	1184.46	848.252	2486.94	2240.09	570.112	676.21	739.283	620.56	490.435	419.269	421.107	567.63	428.769	433.712	514.355	456.475	640.786	692.781	0
chr20_1572775_1572845_-	44	38	36	24	4	6	0	6	30	122	27	93	43	186	32	107	35	186	53	178	17	113	10	15	28	75	669.711	178.52	154.369	49.6767	96.6908	267.869	0	240.01	87.2621	639.517	114.061	539.365	108.705	684.07	69.8208	436.952	71.8034	517.118	104.049	531.063	47.7779	551.298	71.9735
chr9_106210649_106210704_-	4	1	2	0	0	1	0	0	2	17	0	9	3	20	2	12	1	29	0	13	1	16	0	1	1	7	60.8828	4.6979	8.57607	0	0	44.6449	0	0	5.81747	89.113	0	52.1966	7.58405	73.5559	4.3638	49.004	2.05153	80.6259	0	38.7855	2.81047	78.0598	0
chr1_241646023_241646114_-	0	0	6	3	3	0	3	2	10	3	12	1	23	3	21	8	33	6	33	0	10	3	0	0	10	2	0	0	25.7282	6.20959	72.5181	0	373.042	80.0032	29.0874	15.7258	50.6937	5.79962	58.1444	11.0334	45.8199	32.6693	67.7004	16.6812	64.7851	0	28.1047	14.6362	0
chr9_92383230_92383311_-	15	27	44	52	12	4	4	11	70	31	65	34	85	42	133	60	116	63	110	43	79	32	0	0	68	26	228.311	126.843	188.674	107.633	290.072	178.579	497.389	440.018	203.611	162.5	274.591	197.187	214.881	154.467	290.193	245.02	237.977	175.153	215.95	128.29	222.027	156.12	0
chr5_148278406_148278495_-	3	2	26	30	6	0	0	3	56	10	43	4	55	11	80	13	66	12	90	21	75	9	0	0	31	5	45.6621	9.3958	111.489	62.0959	145.036	0	0	120.005	162.889	52.4194	181.652	23.1985	139.041	40.4558	174.552	53.0877	135.401	33.3624	176.687	62.6535	210.785	43.9087	0
chr1_80282539_80282639_-	33	27	16	17	3	2	0	6	12	48	21	46	22	94	15	62	16	114	34	91	16	79	4	11	15	59	502.283	126.843	68.6086	35.1877	72.5181	89.2897	0	240.01	34.9048	251.613	88.7139	266.783	55.6164	345.713	32.7285	253.187	32.8244	316.943	66.7483	271.498	44.9674	385.42	28.7894
chr10_72755544_72755626_-	3	3	10	4	0	1	0	0	7	3	6	1	17	4	9	4	14	9	12	8	8	1	2	2	12	6	45.6621	14.0937	42.8804	8.27945	0	44.6449	0	0	20.3611	15.7258	25.3468	5.79962	42.9763	14.7112	19.6371	16.3347	28.7214	25.0218	23.5582	23.868	22.4837	4.87874	14.3947
chr3_59879046_59879100_-	0	0	5	1	1	0	0	0	8	0	4	3	6	5	3	1	6	6	9	2	4	1	0	0	5	2	0	0	21.4402	2.06986	24.1727	0	0	0	23.2699	0	16.8979	17.3989	15.1681	18.389	6.5457	4.08367	12.3092	16.6812	17.6687	5.967	11.2419	4.87874	0
chr10_43655801_43655823_+	11	16	45	27	6	1	0	7	55	21	25	21	50	28	29	24	48	39	70	37	47	28	4	0	31	7	167.428	75.1664	192.962	55.8863	145.036	44.6449	0	280.011	159.98	110.081	105.612	121.792	126.401	102.978	63.2751	98.008	98.4733	108.428	137.423	110.389	132.092	136.605	28.7894
chr10_57484728_57484780_+	1	0	6	2	2	1	0	0	13	2	4	1	11	4	14	6	16	9	12	3	6	4	0	0	4	1	15.2207	0	25.7282	4.13972	48.3454	44.6449	0	0	37.8136	10.4839	16.8979	5.79962	27.8082	14.7112	30.5466	24.502	32.8244	25.0218	23.5582	8.95049	16.8628	19.515	0
chr14_80509595_80509649_-	1	2	14	5	0	0	0	0	6	6	4	5	10	15	11	6	12	9	17	19	7	8	3	1	14	5	15.2207	9.3958	60.0325	10.3493	0	0	0	0	17.4524	31.4517	16.8979	28.9981	25.2802	55.1669	24.0009	24.502	24.6183	25.0218	33.3742	56.6865	19.6733	39.0299	21.5921
chr6_145146016_145146102_+	1	1	9	2	1	0	0	3	14	5	8	1	9	2	20	2	25	3	17	1	10	3	0	0	2	2	15.2207	4.6979	38.5923	4.13972	24.1727	0	0	120.005	40.7223	26.2097	33.7958	5.79962	22.7522	7.35559	43.638	8.16733	51.2882	8.34061	33.3742	2.9835	28.1047	14.6362	0
chr1_137554199_137554204_-	3	2	9	4	0	1	0	1	11	7	8	8	18	9	14	7	19	18	20	17	15	5	2	0	8	3	45.6621	9.3958	38.5923	8.27945	0	44.6449	0	40.0016	31.9961	36.6936	33.7958	46.397	45.5043	33.1002	30.5466	28.5857	38.979	50.0436	39.2637	50.7195	42.157	24.3937	14.3947
chr10_40407246_40407339_-	5	4	17	14	1	0	0	0	10	5	13	2	19	13	17	9	25	9	24	11	22	5	1	0	25	2	76.1035	18.7916	72.8966	28.9781	24.1727	0	0	0	29.0874	26.2097	54.9181	11.5992	48.0323	47.8113	37.0923	36.753	51.2882	25.0218	47.1165	32.8185	61.8302	24.3937	7.19735
chr15_10761211_10761215_-	1	0	8	3	3	0	1	1	11	5	14	4	23	7	19	4	15	4	25	7	16	7	1	0	6	1	15.2207	0	34.3043	6.20959	72.5181	0	124.347	40.0016	31.9961	26.2097	59.1426	23.1985	58.1444	25.7446	41.4561	16.3347	30.7729	11.1208	49.0797	20.8845	44.9674	34.1512	7.19735
chr1_80300698_80300739_-	21	30	8	5	3	0	1	4	7	86	14	55	12	109	11	56	11	115	10	95	9	80	0	0	3	36	319.635	140.937	34.3043	10.3493	72.5181	0	124.347	160.006	20.3611	450.807	59.1426	318.979	30.3362	400.88	24.0009	228.685	22.5668	319.723	19.6319	283.432	25.2942	390.299	0
chr4_149725969_149726066_-	271	221	131	71	30	32	3	52	135	740	109	669	205	880	126	601	161	979	187	968	122	798	28	47	90	394	4124.81	1038.24	561.733	146.96	725.181	1428.64	373.042	2080.08	392.679	3879.04	460.467	3879.95	518.243	3236.46	274.919	2454.28	330.296	2721.82	367.116	2888.03	342.877	3893.23	201.526
chr12_10719059_10719062_+	6	3	22	34	11	7	5	6	32	14	31	13	36	13	41	28	46	31	53	27	43	27	0	0	26	10	91.3242	14.0937	94.3368	70.3753	265.9	312.514	621.736	240.01	93.0795	73.3872	130.959	75.3951	91.0086	47.8113	89.4579	114.343	94.3702	86.1863	104.049	80.5545	120.85	131.726	0
chr1_84171613_84171675_-	2	0	2	1	0	0	0	0	5	6	0	6	4	6	1	3	6	14	4	11	1	4	0	0	6	2	30.4414	0	8.57607	2.06986	0	0	0	0	14.5437	31.4517	0	34.7977	10.1121	22.0668	2.1819	12.251	12.3092	38.9228	7.85275	32.8185	2.81047	19.515	0
chr8_32026339_32026340_+	0	0	9	1	0	0	0	0	4	1	2	0	5	3	2	2	5	3	12	5	3	0	0	0	6	0	0	0	38.5923	2.06986	0	0	0	0	11.6349	5.24194	8.44894	0	12.6401	11.0334	4.3638	8.16733	10.2576	8.34061	23.5582	14.9175	8.4314	0	0
chr12_7260966_7261031_-	3	3	6	0	0	0	0	0	2	0	3	6	7	10	11	3	3	9	8	9	3	5	1	0	7	3	45.6621	14.0937	25.7282	0	0	0	0	0	5.81747	0	12.6734	34.7977	17.6961	36.778	24.0009	12.251	6.15458	25.0218	15.7055	26.8515	8.4314	24.3937	7.19735
chr1_180812733_180812798_-	3	0	9	8	3	0	0	0	14	6	10	2	21	5	24	5	14	5	23	10	17	4	1	0	11	2	45.6621	0	38.5923	16.5589	72.5181	0	0	0	40.7223	31.4517	42.2447	11.5992	53.0884	18.389	52.3656	20.4183	28.7214	13.901	45.1533	29.835	47.7779	19.515	7.19735
chr10_64309100_64309117_-	14	19	40	27	7	1	1	4	100	68	52	48	85	69	77	37	84	73	84	52	48	51	9	5	38	23	213.09	89.2601	171.521	55.8863	169.209	44.6449	124.347	160.006	290.874	356.452	219.673	278.382	214.881	253.768	168.006	151.096	172.328	202.955	164.908	155.142	134.902	248.816	64.7762
chr1_95982400_95982481_-	14	23	26	30	7	5	3	3	46	29	28	32	41	49	90	80	87	81	113	79	47	68	3	2	58	28	213.09	108.052	111.489	62.0959	169.209	223.224	373.042	120.005	133.802	152.016	118.285	185.588	103.649	180.212	196.371	326.693	178.483	225.196	221.84	235.696	132.092	331.754	21.5921
chr4_119239949_119240024_-	73	149	297	185	110	58	22	64	434	207	438	258	524	284	657	405	652	353	784	530	594	306	17	3	242	118	1111.11	699.987	1273.55	382.924	2659	2589.4	2735.64	2560.1	1262.39	1085.08	1850.32	1496.3	1324.68	1044.49	1433.51	1653.88	1337.6	981.412	1539.14	1581.25	1669.42	1492.89	122.355
chr8_29682989_29683013_-	58	37	93	68	17	10	0	10	78	85	77	83	120	129	107	87	117	141	129	137	86	119	24	10	81	47	882.801	173.822	398.787	140.751	410.936	446.449	0	400.016	226.881	445.565	325.284	481.369	303.362	474.436	233.463	355.279	240.029	392.009	253.251	408.739	241.7	580.57	172.736
chr1_207355528_207355529_+	2	0	3	2	0	0	0	0	5	3	10	6	8	8	14	4	7	7	11	9	9	4	2	0	10	7	30.4414	0	12.8641	4.13972	0	0	0	0	14.5437	15.7258	42.2447	34.7977	20.2241	29.4224	30.5466	16.3347	14.3607	19.4614	21.595	26.8515	25.2942	19.515	14.3947
chr10_72803219_72803228_-	1	1	7	2	0	0	0	1	2	0	8	1	7	2	5	0	5	3	5	3	6	3	2	0	11	3	15.2207	4.6979	30.0163	4.13972	0	0	0	40.0016	5.81747	0	33.7958	5.79962	17.6961	7.35559	10.9095	0	10.2576	8.34061	9.81593	8.95049	16.8628	14.6362	14.3947
chr2_256182512_256182536_+	0	0	8	4	2	0	1	0	13	5	10	0	14	8	24	6	23	2	17	6	16	4	0	0	9	2	0	0	34.3043	8.27945	48.3454	0	124.347	0	37.8136	26.2097	42.2447	0	35.3922	29.4224	52.3656	24.502	47.1851	5.56041	33.3742	17.901	44.9674	19.515	0
chr16_19191249_19191250_-	0	0	3	0	0	0	0	0	0	0	0	1	1	2	1	0	0	0	0	0	1	0	0	0	11	0	0	0	12.8641	0	0	0	0	0	0	0	0	5.79962	2.52802	7.35559	2.1819	0	0	0	0	0	2.81047	0	0
chr10_57484514_57484536_+	3	2	11	2	0	0	0	0	8	3	2	2	4	6	2	5	5	5	8	7	3	1	2	1	5	5	45.6621	9.3958	47.1684	4.13972	0	0	0	0	23.2699	15.7258	8.44894	11.5992	10.1121	22.0668	4.3638	20.4183	10.2576	13.901	15.7055	20.8845	8.4314	4.87874	14.3947
chr17_14489109_14489113_+	2	2	10	2	2	0	0	0	11	1	11	6	17	2	16	5	20	5	17	9	19	5	0	0	11	0	30.4414	9.3958	42.8804	4.13972	48.3454	0	0	0	31.9961	5.24194	46.4692	34.7977	42.9763	7.35559	34.9104	20.4183	41.0305	13.901	33.3742	26.8515	53.3988	24.3937	0
chr3_8995541_8995620_+	7	4	30	20	1	0	0	1	26	8	22	11	34	12	22	7	42	15	35	16	24	9	8	5	37	12	106.545	18.7916	128.641	41.3972	24.1727	0	0	40.0016	75.6271	41.9355	92.9384	63.7959	85.9526	44.1335	48.0018	28.5857	86.1641	41.703	68.7115	47.736	67.4512	43.9087	57.5788
chr1_263931482_263931499_+	5	2	4	3	0	1	0	0	4	9	1	7	5	9	7	5	6	9	6	15	5	11	0	0	4	3	76.1035	9.3958	17.1521	6.20959	0	44.6449	0	0	11.6349	47.1775	4.22447	40.5974	12.6401	33.1002	15.2733	20.4183	12.3092	25.0218	11.7791	44.7525	14.0523	53.6661	0
chr8_112761226_112761228_+	15	16	6	4	1	1	0	2	7	24	3	23	2	25	3	19	2	31	7	29	6	21	0	1	3	22	228.311	75.1664	25.7282	8.27945	24.1727	44.6449	0	80.0032	20.3611	125.807	12.6734	133.391	5.05603	91.9449	6.5457	77.5897	4.10305	86.1863	13.7423	86.5214	16.8628	102.454	0
chr1_96560306_96560373_+	16	13	2	1	0	1	0	2	3	19	1	19	4	41	5	22	1	53	1	40	2	33	0	1	2	14	243.531	61.0727	8.57607	2.06986	0	44.6449	0	80.0032	8.72621	99.5969	4.22447	110.193	10.1121	150.79	10.9095	89.8407	2.05153	147.351	1.96319	119.34	5.62093	160.998	0
chr15_47638341_47638440_+	21	35	199	160	18	7	3	8	205	94	184	63	247	98	177	62	234	112	333	117	228	92	19	3	213	41	319.635	164.427	853.319	331.178	435.108	312.514	373.042	320.013	596.291	492.743	777.303	365.376	624.42	360.424	386.196	253.187	480.057	311.383	653.741	349.069	640.786	448.844	136.75
chr5_141165459_141165492_-	2	2	24	18	1	0	1	0	17	3	10	2	26	4	22	4	21	1	29	8	23	2	0	0	15	2	30.4414	9.3958	102.913	37.2575	24.1727	0	124.347	0	49.4485	15.7258	42.2447	11.5992	65.7284	14.7112	48.0018	16.3347	43.082	2.7802	56.9324	23.868	64.6407	9.75748	0
chr18_16903728_16903802_+	3	3	12	8	0	0	0	1	13	1	4	3	10	10	9	3	13	7	13	6	6	7	0	0	11	2	45.6621	14.0937	51.4564	16.5589	0	0	0	40.0016	37.8136	5.24194	16.8979	17.3989	25.2802	36.778	19.6371	12.251	26.6698	19.4614	25.5214	17.901	16.8628	34.1512	0
chr1_94839888_94839896_+	3	6	12	9	3	2	0	3	8	12	13	2	7	13	6	15	10	21	5	14	10	11	1	0	11	23	45.6621	28.1874	51.4564	18.6288	72.5181	89.2897	0	120.005	23.2699	62.9033	54.9181	11.5992	17.6961	47.8113	13.0914	61.255	20.5153	58.3843	9.81593	41.769	28.1047	53.6661	7.19735
chr8_21132543_21132547_-	0	1	10	5	0	0	0	0	14	2	3	0	18	0	20	5	19	1	18	1	19	0	1	0	13	2	0	4.6979	42.8804	10.3493	0	0	0	0	40.7223	10.4839	12.6734	0	45.5043	0	43.638	20.4183	38.979	2.7802	35.3374	2.9835	53.3988	0	7.19735
chr11_58154331_58154367_+	0	0	5	0	0	0	0	0	4	0	3	0	2	0	1	0	5	1	5	2	4	1	0	0	7	0	0	0	21.4402	0	0	0	0	0	11.6349	0	12.6734	0	5.05603	0	2.1819	0	10.2576	2.7802	9.81593	5.967	11.2419	4.87874	0
chr8_66613046_66613134_-	1	0	4	2	0	0	0	0	9	4	3	0	11	2	15	4	16	6	6	4	4	1	1	0	9	3	15.2207	0	17.1521	4.13972	0	0	0	0	26.1786	20.9678	12.6734	0	27.8082	7.35559	32.7285	16.3347	32.8244	16.6812	11.7791	11.934	11.2419	4.87874	7.19735
chr3_9194235_9194297_-	7	14	42	26	9	4	1	2	56	17	27	32	81	30	74	29	73	33	101	49	85	35	7	0	34	16	106.545	65.7706	180.098	53.8164	217.554	178.579	124.347	80.0032	162.889	89.113	114.061	185.588	204.769	110.334	161.461	118.426	149.761	91.7467	198.282	146.191	238.89	170.756	50.3815
chr9_57540767_57540771_-	0	0	7	2	1	0	0	0	9	1	2	0	5	0	11	3	9	5	13	3	8	2	0	0	4	4	0	0	30.0163	4.13972	24.1727	0	0	0	26.1786	5.24194	8.44894	0	12.6401	0	24.0009	12.251	18.4637	13.901	25.5214	8.95049	22.4837	9.75748	0
chr8_62298300_62298304_+	3	4	12	9	2	2	0	6	13	13	10	16	15	19	13	18	16	21	18	25	16	22	0	0	8	8	45.6621	18.7916	51.4564	18.6288	48.3454	89.2897	0	240.01	37.8136	68.1452	42.2447	92.794	37.9203	69.8781	28.3647	73.506	32.8244	58.3843	35.3374	74.5875	44.9674	107.332	0
chr18_77150659_77150697_+	5	4	9	7	0	1	0	1	13	10	3	19	9	26	13	17	13	42	14	28	13	21	0	0	4	8	76.1035	18.7916	38.5923	14.489	0	44.6449	0	40.0016	37.8136	52.4194	12.6734	110.193	22.7522	95.6227	28.3647	69.4223	26.6698	116.769	27.4846	83.538	36.536	102.454	0
chrX_147110368_147110398_-	0	0	8	3	1	0	0	1	3	2	4	2	2	0	4	1	3	4	4	2	4	3	0	0	5	3	0	0	34.3043	6.20959	24.1727	0	0	40.0016	8.72621	10.4839	16.8979	11.5992	5.05603	0	8.7276	4.08367	6.15458	11.1208	7.85275	5.967	11.2419	14.6362	0
chr5_165531308_165531401_+	0	0	1	0	3	1	3	0	26	9	30	20	34	20	41	41	47	30	64	43	41	31	0	0	7	4	0	0	4.28804	0	72.5181	44.6449	373.042	0	75.6271	47.1775	126.734	115.992	85.9526	73.5559	89.4579	167.43	96.4217	83.4061	125.644	128.29	115.229	151.241	0
chr16_47588821_47588918_+	0	0	1	0	2	0	0	0	7	2	4	9	8	5	8	6	7	5	11	8	6	7	0	0	7	4	0	0	4.28804	0	48.3454	0	0	0	20.3611	10.4839	16.8979	52.1966	20.2241	18.389	17.4552	24.502	14.3607	13.901	21.595	23.868	16.8628	34.1512	0
chr9_62242314_62242378_+	9	3	1	0	2	1	0	4	7	12	8	13	3	32	7	28	11	43	8	25	2	25	1	1	3	8	136.986	14.0937	4.28804	0	48.3454	44.6449	0	160.006	20.3611	62.9033	33.7958	75.3951	7.58405	117.689	15.2733	114.343	22.5668	119.549	15.7055	74.5875	5.62093	121.968	7.19735
chr2_77348883_77348970_+	4	6	28	7	3	3	0	1	42	28	20	18	60	31	29	28	61	45	67	33	50	37	3	2	20	4	60.8828	28.1874	120.065	14.489	72.5181	133.935	0	40.0016	122.167	146.774	84.4894	104.393	151.681	114.012	63.2751	114.343	125.143	125.109	131.533	98.4554	140.523	180.513	21.5921
chr9_62193846_62193887_+	6	4	2	1	0	0	0	0	0	18	4	9	2	17	2	13	3	27	4	21	1	15	0	0	4	6	91.3242	18.7916	8.57607	2.06986	0	0	0	0	0	94.355	16.8979	52.1966	5.05603	62.5225	4.3638	53.0877	6.15458	75.0655	7.85275	62.6535	2.81047	73.1811	0
chr7_132062907_132062955_-	2	1	3	0	0	0	0	0	20	1	11	3	11	2	22	0	14	5	34	8	11	4	0	0	6	1	30.4414	4.6979	12.8641	0	0	0	0	0	58.1747	5.24194	46.4692	17.3989	27.8082	7.35559	48.0018	0	28.7214	13.901	66.7483	23.868	30.9151	19.515	0
chr10_59883968_59884014_+	23	26	20	18	7	4	0	13	16	58	27	67	22	83	17	76	17	84	35	115	13	73	6	3	17	46	350.076	122.145	85.7607	37.2575	169.209	178.579	0	520.021	46.5398	304.033	114.061	388.575	55.6164	305.257	37.0923	310.359	34.8759	233.537	68.7115	343.102	36.536	356.148	43.1841
chr10_65874233_65874241_+	3	0	3	1	0	1	0	0	12	9	6	6	10	7	18	8	13	8	17	5	13	7	0	0	2	1	45.6621	0	12.8641	2.06986	0	44.6449	0	0	34.9048	47.1775	25.3468	34.7977	25.2802	25.7446	39.2742	32.6693	26.6698	22.2416	33.3742	14.9175	36.536	34.1512	0
chr11_36889012_36889013_+	10	11	17	15	5	0	1	3	18	13	11	15	24	25	12	11	22	18	26	24	12	17	2	1	11	14	152.207	51.6769	72.8966	31.0479	120.863	0	124.347	120.005	52.3572	68.1452	46.4692	86.9943	60.6724	91.9449	26.1828	44.9203	45.1336	50.0436	51.0428	71.604	33.7256	82.9386	14.3947
chr18_29900482_29900540_+	8	6	7	7	0	2	0	1	2	13	0	8	3	19	2	4	6	18	3	17	6	9	0	0	4	8	121.766	28.1874	30.0163	14.489	0	89.2897	0	40.0016	5.81747	68.1452	0	46.397	7.58405	69.8781	4.3638	16.3347	12.3092	50.0436	5.88956	50.7195	16.8628	43.9087	0
chr2_77561973_77562067_+	5	3	1	0	0	0	0	0	1	7	5	10	1	11	4	16	2	15	7	25	5	17	0	0	2	7	76.1035	14.0937	4.28804	0	0	0	0	0	2.90874	36.6936	21.1224	57.9962	2.52802	40.4558	8.7276	65.3387	4.10305	41.703	13.7423	74.5875	14.0523	82.9386	0
chr6_26343368_26343370_+	3	0	5	1	0	0	0	0	3	0	3	2	4	1	1	0	7	3	2	1	2	0	0	0	1	0	45.6621	0	21.4402	2.06986	0	0	0	0	8.72621	0	12.6734	11.5992	10.1121	3.6778	2.1819	0	14.3607	8.34061	3.92637	2.9835	5.62093	0	0
chr5_134780728_134780741_+	4	3	4	2	0	0	0	2	5	9	1	5	4	10	3	16	5	16	4	12	1	18	0	0	3	6	60.8828	14.0937	17.1521	4.13972	0	0	0	80.0032	14.5437	47.1775	4.22447	28.9981	10.1121	36.778	6.5457	65.3387	10.2576	44.4832	7.85275	35.802	2.81047	87.8173	0
chr13_68734587_68734598_+	0	0	7	1	0	0	0	0	5	1	0	0	11	3	4	2	12	6	12	3	5	0	0	0	2	4	0	0	30.0163	2.06986	0	0	0	0	14.5437	5.24194	0	0	27.8082	11.0334	8.7276	8.16733	24.6183	16.6812	23.5582	8.95049	14.0523	0	0
chr10_16820788_16820877_-	3	2	3	1	2	0	0	0	3	5	3	2	4	11	1	8	3	9	3	10	1	7	0	0	3	5	45.6621	9.3958	12.8641	2.06986	48.3454	0	0	0	8.72621	26.2097	12.6734	11.5992	10.1121	40.4558	2.1819	32.6693	6.15458	25.0218	5.88956	29.835	2.81047	34.1512	0
chr1_207345546_207345547_+	6	6	21	20	1	1	0	1	25	18	24	14	24	24	18	19	24	18	30	24	27	16	7	0	26	17	91.3242	28.1874	90.0488	41.3972	24.1727	44.6449	0	40.0016	72.7184	94.355	101.387	81.1947	60.6724	88.2671	39.2742	77.5897	49.2366	50.0436	58.8956	71.604	75.8826	78.0598	50.3815
chr19_11488963_11489063_-	13	14	65	53	2	3	4	1	83	18	26	11	59	18	61	9	73	53	76	19	52	17	19	4	92	24	197.869	65.7706	278.722	109.703	48.3454	133.935	497.389	40.0016	241.425	94.355	109.836	63.7959	149.153	66.2003	133.096	36.753	149.761	147.351	149.202	56.6865	146.144	82.9386	136.75
chr19_12115657_12115749_-	3	0	3	0	0	1	0	0	4	8	1	2	2	5	1	8	3	12	2	8	0	6	0	0	0	2	45.6621	0	12.8641	0	0	44.6449	0	0	11.6349	41.9355	4.22447	11.5992	5.05603	18.389	2.1819	32.6693	6.15458	33.3624	3.92637	23.868	0	29.2724	0
chr4_37691135_37691234_-	3	0	1	0	0	0	0	0	1	8	2	3	2	7	2	2	2	9	3	8	0	6	0	0	2	2	45.6621	0	4.28804	0	0	0	0	0	2.90874	41.9355	8.44894	17.3989	5.05603	25.7446	4.3638	8.16733	4.10305	25.0218	5.88956	23.868	0	29.2724	0
chr10_18565695_18565790_-	2	1	7	5	1	0	1	1	5	2	5	1	9	1	5	7	12	6	13	11	5	7	0	0	7	4	30.4414	4.6979	30.0163	10.3493	24.1727	0	124.347	40.0016	14.5437	10.4839	21.1224	5.79962	22.7522	3.6778	10.9095	28.5857	24.6183	16.6812	25.5214	32.8185	14.0523	34.1512	0
chr1_212742193_212742242_-	3	0	0	0	0	0	0	0	0	3	0	2	0	10	0	5	2	11	0	5	0	4	0	0	0	10	45.6621	0	0	0	0	0	0	0	0	15.7258	0	11.5992	0	36.778	0	20.4183	4.10305	30.5822	0	14.9175	0	19.515	0
chr4_143833634_143833637_+	2	3	7	4	0	0	0	0	7	14	5	8	17	18	10	7	12	16	10	12	14	17	0	0	7	7	30.4414	14.0937	30.0163	8.27945	0	0	0	0	20.3611	73.3872	21.1224	46.397	42.9763	66.2003	21.819	28.5857	24.6183	44.4832	19.6319	35.802	39.3465	82.9386	0
chr6_110012937_110012965_+	1	0	4	1	0	0	2	3	16	3	4	4	12	7	9	4	15	12	13	4	7	3	0	0	4	1	15.2207	0	17.1521	2.06986	0	0	248.694	120.005	46.5398	15.7258	16.8979	23.1985	30.3362	25.7446	19.6371	16.3347	30.7729	33.3624	25.5214	11.934	19.6733	14.6362	0
chr12_36230740_36230741_+	10	8	4	3	2	3	0	2	6	22	2	18	7	25	6	17	5	25	5	26	4	18	0	0	2	9	152.207	37.5832	17.1521	6.20959	48.3454	133.935	0	80.0032	17.4524	115.323	8.44894	104.393	17.6961	91.9449	13.0914	69.4223	10.2576	69.5051	9.81593	77.571	11.2419	87.8173	0
chr3_108255188_108255263_+	22	49	99	97	28	11	4	18	114	51	100	77	173	122	185	99	169	129	212	129	177	69	2	0	97	41	334.855	230.197	424.516	200.777	676.835	491.093	497.389	720.029	331.596	267.339	422.447	446.571	437.347	448.691	403.652	404.283	346.708	358.646	416.196	384.871	497.452	336.633	14.3947
chr16_61768267_61768357_+	2	3	3	2	1	0	0	1	7	7	15	9	13	24	23	21	24	18	22	19	17	22	1	0	19	7	30.4414	14.0937	12.8641	4.13972	24.1727	0	0	40.0016	20.3611	36.6936	63.3671	52.1966	32.8642	88.2671	50.1837	85.757	49.2366	50.0436	43.1901	56.6865	47.7779	107.332	7.19735
chr14_44118844_44118898_-	2	2	9	1	0	0	0	0	9	8	3	2	7	3	7	3	5	3	10	6	9	2	1	0	6	1	30.4414	9.3958	38.5923	2.06986	0	0	0	0	26.1786	41.9355	12.6734	11.5992	17.6961	11.0334	15.2733	12.251	10.2576	8.34061	19.6319	17.901	25.2942	9.75748	7.19735
chr17_21067057_21067071_-	1	0	15	7	4	2	0	1	48	8	26	3	56	5	49	9	46	13	61	12	42	4	5	0	15	5	15.2207	0	64.3205	14.489	96.6908	89.2897	0	40.0016	139.619	41.9355	109.836	17.3989	141.569	18.389	106.913	36.753	94.3702	36.1426	119.754	35.802	118.04	19.515	35.9868
chr3_155519450_155519452_+	3	3	5	1	0	0	0	2	1	3	0	2	2	2	0	2	3	5	3	4	2	2	0	0	4	3	45.6621	14.0937	21.4402	2.06986	0	0	0	80.0032	2.90874	15.7258	0	11.5992	5.05603	7.35559	0	8.16733	6.15458	13.901	5.88956	11.934	5.62093	9.75748	0
chr8_4079900_4079961_+	2	1	7	1	0	0	0	0	18	3	12	4	20	5	15	4	12	9	21	2	11	1	1	1	6	2	30.4414	4.6979	30.0163	2.06986	0	0	0	0	52.3572	15.7258	50.6937	23.1985	50.5603	18.389	32.7285	16.3347	24.6183	25.0218	41.2269	5.967	30.9151	4.87874	7.19735
chr17_15044635_15044732_-	2	5	21	8	7	0	2	2	44	9	21	6	42	16	57	16	57	24	68	20	43	19	0	0	25	2	30.4414	23.4895	90.0488	16.5589	169.209	0	248.694	80.0032	127.984	47.1775	88.7139	34.7977	106.177	58.8447	124.368	65.3387	116.937	66.7249	133.497	59.67	120.85	92.696	0
chr10_52894948_52894957_-	17	10	16	28	0	0	0	2	6	17	6	19	8	33	13	32	11	56	15	29	2	17	4	3	30	23	258.752	46.979	68.6086	57.9561	0	0	0	80.0032	17.4524	89.113	25.3468	110.193	20.2241	121.367	28.3647	130.677	22.5668	155.691	29.4478	86.5214	5.62093	82.9386	28.7894
chr12_35986459_35986503_-	3	3	13	10	2	0	1	1	18	7	11	8	23	6	11	5	18	10	19	7	13	7	2	1	15	6	45.6621	14.0937	55.7445	20.6986	48.3454	0	124.347	40.0016	52.3572	36.6936	46.4692	46.397	58.1444	22.0668	24.0009	20.4183	36.9275	27.802	37.3005	20.8845	36.536	34.1512	14.3947
chr3_56514371_56514372_-	3	2	9	3	7	0	0	0	11	2	12	7	10	5	19	8	15	5	22	2	16	5	0	0	1	4	45.6621	9.3958	38.5923	6.20959	169.209	0	0	0	31.9961	10.4839	50.6937	40.5974	25.2802	18.389	41.4561	32.6693	30.7729	13.901	43.1901	5.967	44.9674	24.3937	0
chr8_45032638_45032698_-	11	9	5	5	0	0	0	0	3	24	1	24	5	36	3	19	5	46	2	37	4	29	0	2	4	17	167.428	42.2811	21.4402	10.3493	0	0	0	0	8.72621	125.807	4.22447	139.191	12.6401	132.401	6.5457	77.5897	10.2576	127.889	3.92637	110.389	11.2419	141.483	0
chr16_47600594_47600688_+	3	4	8	6	0	0	0	0	0	3	2	2	5	6	7	4	3	5	5	5	5	2	0	0	8	7	45.6621	18.7916	34.3043	12.4192	0	0	0	0	0	15.7258	8.44894	11.5992	12.6401	22.0668	15.2733	16.3347	6.15458	13.901	9.81593	14.9175	14.0523	9.75748	0
chr5_169625369_169625453_-	4	3	6	6	1	0	0	0	6	4	1	0	4	5	3	5	3	2	5	4	1	1	0	0	7	7	60.8828	14.0937	25.7282	12.4192	24.1727	0	0	0	17.4524	20.9678	4.22447	0	10.1121	18.389	6.5457	20.4183	6.15458	5.56041	9.81593	11.934	2.81047	4.87874	0
chr10_110009305_110009356_-	0	0	0	0	3	0	2	1	19	16	19	3	25	16	30	17	24	16	18	17	22	16	0	0	13	5	0	0	0	0	72.5181	0	248.694	40.0016	55.266	83.8711	80.265	17.3989	63.2004	58.8447	65.457	69.4223	49.2366	44.4832	35.3374	50.7195	61.8302	78.0598	0
chr1_84171902_84171968_-	0	0	3	0	0	0	0	0	3	0	0	1	0	0	0	1	1	1	8	0	4	3	0	0	6	1	0	0	12.8641	0	0	0	0	0	8.72621	0	0	5.79962	0	0	0	4.08367	2.05153	2.7802	15.7055	0	11.2419	14.6362	0
chrX_56612711_56612811_-	5	4	59	60	1	0	2	4	98	15	49	9	94	15	38	10	81	13	114	26	70	15	11	0	81	4	76.1035	18.7916	252.994	124.192	24.1727	0	248.694	160.006	285.056	78.6291	206.999	52.1966	237.634	55.1669	82.9122	40.8367	166.174	36.1426	223.803	77.571	196.733	73.1811	79.1709
chr3_124009255_124009333_+	7	1	11	5	0	0	0	0	8	1	2	1	10	4	11	0	10	5	6	3	10	3	2	3	17	2	106.545	4.6979	47.1684	10.3493	0	0	0	0	23.2699	5.24194	8.44894	5.79962	25.2802	14.7112	24.0009	0	20.5153	13.901	11.7791	8.95049	28.1047	14.6362	14.3947
chr1_199391054_199391137_+	2	6	18	5	1	0	0	6	24	19	21	13	29	22	27	21	30	28	36	36	30	12	1	3	26	9	30.4414	28.1874	77.1846	10.3493	24.1727	0	0	240.01	69.8097	99.5969	88.7139	75.3951	73.3125	80.9115	58.9113	85.757	61.5458	77.8457	70.6747	107.406	84.314	58.5449	7.19735
chr7_128974121_128974154_-	1	0	3	0	0	0	0	0	2	1	2	2	5	3	0	0	5	0	7	3	2	1	0	0	6	0	15.2207	0	12.8641	0	0	0	0	0	5.81747	5.24194	8.44894	11.5992	12.6401	11.0334	0	0	10.2576	0	13.7423	8.95049	5.62093	4.87874	0
chr1_207341504_207341506_+	1	0	3	0	0	0	0	0	1	0	0	0	3	2	2	1	3	2	2	2	2	1	0	0	6	0	15.2207	0	12.8641	0	0	0	0	0	2.90874	0	0	0	7.58405	7.35559	4.3638	4.08367	6.15458	5.56041	3.92637	5.967	5.62093	4.87874	0
chr4_143962010_143962011_+	4	3	12	6	3	0	0	0	17	10	9	9	15	11	14	7	13	17	17	24	13	13	4	2	17	6	60.8828	14.0937	51.4564	12.4192	72.5181	0	0	0	49.4485	52.4194	38.0202	52.1966	37.9203	40.4558	30.5466	28.5857	26.6698	47.2634	33.3742	71.604	36.536	63.4236	28.7894
chr2_197218611_197218711_+	8	4	1	0	0	0	0	0	4	8	2	8	4	23	1	9	2	22	5	22	3	12	0	1	1	8	121.766	18.7916	4.28804	0	0	0	0	0	11.6349	41.9355	8.44894	46.397	10.1121	84.5893	2.1819	36.753	4.10305	61.1645	9.81593	65.637	8.4314	58.5449	0
chr4_121008567_121008569_+	5	6	11	9	2	0	1	0	8	10	4	10	16	16	15	7	16	8	9	19	10	7	0	0	8	7	76.1035	28.1874	47.1684	18.6288	48.3454	0	124.347	0	23.2699	52.4194	16.8979	57.9962	40.4483	58.8447	32.7285	28.5857	32.8244	22.2416	17.6687	56.6865	28.1047	34.1512	0
chr7_142250165_142250218_-	1	1	9	8	2	0	0	0	14	3	27	2	19	7	33	3	32	8	34	10	33	6	0	0	15	4	15.2207	4.6979	38.5923	16.5589	48.3454	0	0	0	40.7223	15.7258	114.061	11.5992	48.0323	25.7446	72.0027	12.251	65.6488	22.2416	66.7483	29.835	92.7453	29.2724	0
chr18_32318135_32318212_+	0	0	6	1	0	0	0	0	1	0	0	4	2	2	9	1	1	3	5	1	1	3	0	0	3	2	0	0	25.7282	2.06986	0	0	0	0	2.90874	0	0	23.1985	5.05603	7.35559	19.6371	4.08367	2.05153	8.34061	9.81593	2.9835	2.81047	14.6362	0
chr14_79256626_79256715_-	3	1	5	4	1	0	0	0	13	2	4	0	6	12	6	2	6	4	8	12	11	4	1	0	13	2	45.6621	4.6979	21.4402	8.27945	24.1727	0	0	0	37.8136	10.4839	16.8979	0	15.1681	44.1335	13.0914	8.16733	12.3092	11.1208	15.7055	35.802	30.9151	19.515	7.19735
chr15_54214215_54214257_+	15	30	95	103	25	8	14	21	220	50	172	45	275	64	275	62	317	83	329	104	266	77	0	0	104	28	228.311	140.937	407.363	213.196	604.317	357.159	1740.86	840.034	639.922	262.097	726.609	260.983	695.205	235.379	600.023	253.187	650.334	230.757	645.888	310.284	747.584	375.663	0
chr12_35277538_35277613_+	181	156	102	65	23	19	3	26	110	441	92	394	142	532	101	355	118	564	151	592	87	433	20	52	80	269	2754.95	732.873	437.38	134.541	555.972	848.252	373.042	1040.04	319.961	2311.7	388.651	2285.05	358.978	1956.59	220.372	1449.7	242.08	1568.03	296.441	1766.23	244.51	2112.49	143.947
chr17_6484151_6484250_-	2	2	8	6	3	0	0	0	13	7	11	16	17	25	17	15	21	20	32	30	22	13	0	0	9	4	30.4414	9.3958	34.3043	12.4192	72.5181	0	0	0	37.8136	36.6936	46.4692	92.794	42.9763	91.9449	37.0923	61.255	43.082	55.6041	62.822	89.5049	61.8302	63.4236	0
chr16_6450405_6450453_-	1	0	6	2	2	1	0	0	5	1	5	5	7	0	8	0	6	2	5	2	1	1	0	0	7	0	15.2207	0	25.7282	4.13972	48.3454	44.6449	0	0	14.5437	5.24194	21.1224	28.9981	17.6961	0	17.4552	0	12.3092	5.56041	9.81593	5.967	2.81047	4.87874	0
chr1_186876055_186876090_+	1	2	5	1	5	0	1	2	19	8	22	6	15	4	29	15	29	6	25	9	22	11	0	0	11	2	15.2207	9.3958	21.4402	2.06986	120.863	0	124.347	80.0032	55.266	41.9355	92.9384	34.7977	37.9203	14.7112	63.2751	61.255	59.4943	16.6812	49.0797	26.8515	61.8302	53.6661	0
chr19_36887182_36887193_+	0	0	0	0	7	6	2	3	54	16	50	17	62	20	77	25	80	30	77	27	61	18	1	0	21	4	0	0	0	0	169.209	267.869	248.694	120.005	157.072	83.8711	211.224	98.5936	156.737	73.5559	168.006	102.092	164.122	83.4061	151.165	80.5545	171.438	87.8173	7.19735
chr4_149764172_149764174_-	4	7	17	15	0	1	0	0	4	15	3	8	10	18	7	10	12	24	16	32	11	24	3	1	19	20	60.8828	32.8853	72.8966	31.0479	0	44.6449	0	0	11.6349	78.6291	12.6734	46.397	25.2802	66.2003	15.2733	40.8367	24.6183	66.7249	31.411	95.4719	30.9151	117.09	21.5921
chr4_185777680_185777682_+	1	1	3	1	1	0	0	0	4	2	2	2	8	5	2	3	2	5	6	3	5	3	0	0	6	4	15.2207	4.6979	12.8641	2.06986	24.1727	0	0	0	11.6349	10.4839	8.44894	11.5992	20.2241	18.389	4.3638	12.251	4.10305	13.901	11.7791	8.95049	14.0523	14.6362	0
chr13_68739499_68739503_+	1	0	5	1	0	0	0	0	4	1	1	0	7	3	4	1	4	4	8	7	8	4	1	0	5	2	15.2207	0	21.4402	2.06986	0	0	0	0	11.6349	5.24194	4.22447	0	17.6961	11.0334	8.7276	4.08367	8.2061	11.1208	15.7055	20.8845	22.4837	19.515	7.19735
chr14_16501199_16501287_-	1	2	11	7	1	1	0	0	25	6	6	1	25	6	15	3	35	6	35	4	26	4	2	0	15	3	15.2207	9.3958	47.1684	14.489	24.1727	44.6449	0	0	72.7184	31.4517	25.3468	5.79962	63.2004	22.0668	32.7285	12.251	71.8034	16.6812	68.7115	11.934	73.0721	19.515	14.3947
chr4_180409769_180409844_-	0	1	5	0	0	0	0	0	4	4	2	0	4	1	2	0	3	3	3	0	2	1	0	0	5	2	0	4.6979	21.4402	0	0	0	0	0	11.6349	20.9678	8.44894	0	10.1121	3.6778	4.3638	0	6.15458	8.34061	5.88956	0	5.62093	4.87874	0
chr4_161286069_161286090_-	3	4	23	14	2	1	0	0	29	6	22	4	25	7	52	8	34	12	36	10	33	6	5	0	20	5	45.6621	18.7916	98.6248	28.9781	48.3454	44.6449	0	0	84.3533	31.4517	92.9384	23.1985	63.2004	25.7446	113.459	32.6693	69.7519	33.3624	70.6747	29.835	92.7453	29.2724	35.9868
chr7_116628351_116628368_-	2	2	3	1	0	0	0	5	1	6	2	5	3	15	4	12	4	18	1	11	0	8	1	0	6	8	30.4414	9.3958	12.8641	2.06986	0	0	0	200.008	2.90874	31.4517	8.44894	28.9981	7.58405	55.1669	8.7276	49.004	8.2061	50.0436	1.96319	32.8185	0	39.0299	7.19735
chr10_46073132_46073133_+	1	0	5	2	1	0	0	0	3	2	2	2	4	3	3	0	3	2	6	3	2	2	0	0	3	4	15.2207	0	21.4402	4.13972	24.1727	0	0	0	8.72621	10.4839	8.44894	11.5992	10.1121	11.0334	6.5457	0	6.15458	5.56041	11.7791	8.95049	5.62093	9.75748	0
chr14_77932397_77932399_+	2	2	11	7	1	0	0	1	5	13	7	14	13	7	8	9	7	15	16	13	9	13	4	2	17	13	30.4414	9.3958	47.1684	14.489	24.1727	0	0	40.0016	14.5437	68.1452	29.5713	81.1947	32.8642	25.7446	17.4552	36.753	14.3607	41.703	31.411	38.7855	25.2942	63.4236	28.7894
chr9_33049210_33049308_+	14	10	21	42	11	9	0	5	44	21	14	12	45	38	29	21	22	27	41	22	20	19	2	0	31	16	213.09	46.979	90.0488	86.9342	265.9	401.804	0	200.008	127.984	110.081	59.1426	69.5955	113.761	139.756	63.2751	85.757	45.1336	75.0655	80.4906	65.637	56.2093	92.696	14.3947
chr7_55576435_55576438_+	0	1	4	0	0	0	0	0	2	8	3	2	8	12	1	5	7	6	11	9	7	14	0	0	4	5	0	4.6979	17.1521	0	0	0	0	0	5.81747	41.9355	12.6734	11.5992	20.2241	44.1335	2.1819	20.4183	14.3607	16.6812	21.595	26.8515	19.6733	68.3023	0
chr6_128854004_128854007_-	3	1	3	2	0	0	0	2	0	4	2	3	4	8	1	6	6	12	3	8	1	4	0	0	5	3	45.6621	4.6979	12.8641	4.13972	0	0	0	80.0032	0	20.9678	8.44894	17.3989	10.1121	29.4224	2.1819	24.502	12.3092	33.3624	5.88956	23.868	2.81047	19.515	0
chr13_86025586_86025628_-	1	1	4	0	0	1	0	0	3	0	3	0	2	1	4	1	7	0	7	5	5	0	0	0	5	1	15.2207	4.6979	17.1521	0	0	44.6449	0	0	8.72621	0	12.6734	0	5.05603	3.6778	8.7276	4.08367	14.3607	0	13.7423	14.9175	14.0523	0	0
chr20_1554442_1554443_-	1	1	0	0	0	0	0	1	0	5	0	7	1	5	1	4	0	5	0	5	0	5	0	0	6	10	15.2207	4.6979	0	0	0	0	0	40.0016	0	26.2097	0	40.5974	2.52802	18.389	2.1819	16.3347	0	13.901	0	14.9175	0	24.3937	0
chr6_3250008_3250009_+	3	2	6	4	2	1	0	3	9	6	0	4	3	9	7	8	5	8	8	16	2	5	3	0	10	9	45.6621	9.3958	25.7282	8.27945	48.3454	44.6449	0	120.005	26.1786	31.4517	0	23.1985	7.58405	33.1002	15.2733	32.6693	10.2576	22.2416	15.7055	47.736	5.62093	24.3937	21.5921
chr7_95808248_95808250_+	1	3	10	4	0	0	0	0	9	1	15	1	14	2	24	3	23	3	24	8	18	5	0	0	9	3	15.2207	14.0937	42.8804	8.27945	0	0	0	0	26.1786	5.24194	63.3671	5.79962	35.3922	7.35559	52.3656	12.251	47.1851	8.34061	47.1165	23.868	50.5884	24.3937	0
chr3_8814989_8815071_+	8	11	34	30	1	1	0	0	42	12	38	9	40	28	66	31	66	38	91	34	55	18	7	0	39	11	121.766	51.6769	145.793	62.0959	24.1727	44.6449	0	0	122.167	62.9033	160.53	52.1966	101.121	102.978	144.005	126.594	135.401	105.648	178.65	101.439	154.576	87.8173	50.3815
chr6_128871281_128871283_-	3	2	9	3	0	0	0	0	6	3	7	1	6	1	7	4	3	4	7	0	4	1	0	0	7	0	45.6621	9.3958	38.5923	6.20959	0	0	0	0	17.4524	15.7258	29.5713	5.79962	15.1681	3.6778	15.2733	16.3347	6.15458	11.1208	13.7423	0	11.2419	4.87874	0
chr5_169409335_169409341_+	0	0	0	0	7	0	1	0	11	4	25	3	10	3	39	6	33	6	32	7	15	4	0	0	14	4	0	0	0	0	169.209	0	124.347	0	31.9961	20.9678	105.612	17.3989	25.2802	11.0334	85.0941	24.502	67.7004	16.6812	62.822	20.8845	42.157	19.515	0
chr5_156424630_156424705_+	3	4	14	17	3	4	1	0	36	10	41	11	38	19	83	18	65	19	82	34	57	22	2	0	45	7	45.6621	18.7916	60.0325	35.1877	72.5181	178.579	124.347	0	104.714	52.4194	173.203	63.7959	96.0646	69.8781	181.098	73.506	133.349	52.8239	160.981	101.439	160.197	107.332	14.3947
chr6_128888070_128888124_-	0	1	4	0	1	0	0	0	8	4	4	1	6	3	6	8	11	10	8	8	3	2	0	0	4	5	0	4.6979	17.1521	0	24.1727	0	0	0	23.2699	20.9678	16.8979	5.79962	15.1681	11.0334	13.0914	32.6693	22.5668	27.802	15.7055	23.868	8.4314	9.75748	0
chr15_85913157_85913221_+	0	0	5	0	0	0	0	0	3	1	4	4	4	0	1	0	0	0	0	2	2	0	0	0	3	1	0	0	21.4402	0	0	0	0	0	8.72621	5.24194	16.8979	23.1985	10.1121	0	2.1819	0	0	0	0	5.967	5.62093	0	0
chr4_8759602_8759690_-	1	1	13	11	3	0	0	1	28	1	14	4	34	8	32	5	37	3	43	8	28	4	0	0	14	3	15.2207	4.6979	55.7445	22.7685	72.5181	0	0	40.0016	81.4446	5.24194	59.1426	23.1985	85.9526	29.4224	69.8208	20.4183	75.9065	8.34061	84.417	23.868	78.693	19.515	0
chr1_265336787_265336881_-	2	3	7	3	0	1	1	0	13	6	1	6	10	2	5	7	7	10	13	19	11	4	2	0	13	4	30.4414	14.0937	30.0163	6.20959	0	44.6449	124.347	0	37.8136	31.4517	4.22447	34.7977	25.2802	7.35559	10.9095	28.5857	14.3607	27.802	25.5214	56.6865	30.9151	19.515	14.3947
chr16_20011389_20011416_+	36	48	85	102	47	14	6	36	127	85	137	97	167	140	179	118	176	152	207	174	163	117	10	0	88	47	547.945	225.499	364.483	211.126	1136.12	625.028	746.083	1440.06	369.409	445.565	578.753	562.563	422.179	514.891	390.56	481.873	361.069	422.591	406.38	519.129	458.106	570.812	71.9735
chr1_185974611_185974613_-	7	10	34	31	13	4	3	3	52	18	43	9	45	16	61	14	54	26	59	18	64	18	10	0	42	17	106.545	46.979	145.793	64.1657	314.245	178.579	373.042	120.005	151.254	94.355	181.652	52.1966	113.761	58.8447	133.096	57.1713	110.782	72.2853	115.828	53.703	179.87	87.8173	71.9735
chr1_207318499_207318503_+	2	3	9	6	0	0	0	0	12	12	4	8	16	11	14	5	13	16	24	20	18	7	3	0	13	11	30.4414	14.0937	38.5923	12.4192	0	0	0	0	34.9048	62.9033	16.8979	46.397	40.4483	40.4558	30.5466	20.4183	26.6698	44.4832	47.1165	59.67	50.5884	34.1512	21.5921
chr8_48878829_48878890_-	1	1	3	1	1	4	0	1	7	1	4	3	5	0	12	7	16	3	13	1	12	1	0	0	6	4	15.2207	4.6979	12.8641	2.06986	24.1727	178.579	0	40.0016	20.3611	5.24194	16.8979	17.3989	12.6401	0	26.1828	28.5857	32.8244	8.34061	25.5214	2.9835	33.7256	4.87874	0
chr10_13420667_13420738_-	20	28	49	69	4	6	0	6	48	35	56	30	49	49	107	61	80	72	89	89	54	44	5	0	58	29	304.414	131.541	210.114	142.82	96.6908	267.869	0	240.01	139.619	183.468	236.57	173.989	123.873	180.212	233.463	249.104	164.122	200.175	174.724	265.531	151.765	214.665	35.9868
chr10_52896057_52896059_-	1	1	3	1	0	0	0	1	1	3	4	3	3	6	4	9	5	9	2	5	2	5	0	0	6	4	15.2207	4.6979	12.8641	2.06986	0	0	0	40.0016	2.90874	15.7258	16.8979	17.3989	7.58405	22.0668	8.7276	36.753	10.2576	25.0218	3.92637	14.9175	5.62093	24.3937	0
chr1_235765195_235765197_-	1	0	3	1	0	1	0	0	3	3	4	2	4	6	5	4	6	5	9	4	7	3	0	0	6	1	15.2207	0	12.8641	2.06986	0	44.6449	0	0	8.72621	15.7258	16.8979	11.5992	10.1121	22.0668	10.9095	16.3347	12.3092	13.901	17.6687	11.934	19.6733	14.6362	0
chr1_83501166_83501168_+	1	2	6	1	3	0	0	0	9	2	13	3	16	2	18	3	9	4	18	3	7	4	4	0	15	7	15.2207	9.3958	25.7282	2.06986	72.5181	0	0	0	26.1786	10.4839	54.9181	17.3989	40.4483	7.35559	39.2742	12.251	18.4637	11.1208	35.3374	8.95049	19.6733	19.515	28.7894
chr12_35300470_35300471_+	10	4	5	3	2	1	0	3	7	18	6	17	12	17	7	19	9	23	12	29	5	18	3	1	3	15	152.207	18.7916	21.4402	6.20959	48.3454	44.6449	0	120.005	20.3611	94.355	25.3468	98.5936	30.3362	62.5225	15.2733	77.5897	18.4637	63.9447	23.5582	86.5214	14.0523	87.8173	21.5921
chr1_207332189_207332247_+	3	10	22	14	3	0	0	1	29	22	34	13	59	22	45	14	52	23	56	29	44	31	2	0	38	13	45.6621	46.979	94.3368	28.9781	72.5181	0	0	40.0016	84.3533	115.323	143.632	75.3951	149.153	80.9115	98.1855	57.1713	106.679	63.9447	109.938	86.5214	123.66	151.241	14.3947
chr2_191569101_191569182_+	0	0	12	6	0	0	0	0	6	1	8	1	11	1	9	1	11	3	24	3	9	2	1	0	8	2	0	0	51.4564	12.4192	0	0	0	0	17.4524	5.24194	33.7958	5.79962	27.8082	3.6778	19.6371	4.08367	22.5668	8.34061	47.1165	8.95049	25.2942	9.75748	7.19735
chr3_124019318_124019377_+	6	7	24	16	1	4	0	1	26	19	10	13	39	30	25	15	28	24	28	29	23	19	8	4	35	15	91.3242	32.8853	102.913	33.1178	24.1727	178.579	0	40.0016	75.6271	99.5969	42.2447	75.3951	98.5927	110.334	54.5475	61.255	57.4427	66.7249	54.9692	86.5214	64.6407	92.696	57.5788
chr3_124055567_124055659_+	8	12	52	34	4	2	1	1	79	25	64	39	80	40	68	26	100	53	116	46	72	38	11	4	46	18	121.766	56.3748	222.978	70.3753	96.6908	89.2897	124.347	40.0016	229.79	131.049	270.366	226.185	202.241	147.112	148.369	106.175	205.153	147.351	227.73	137.241	202.353	185.392	79.1709
chr1_265316663_265316723_-	0	1	6	5	0	0	0	0	14	8	8	4	8	4	7	3	6	7	14	6	11	5	1	0	17	6	0	4.6979	25.7282	10.3493	0	0	0	0	40.7223	41.9355	33.7958	23.1985	20.2241	14.7112	15.2733	12.251	12.3092	19.4614	27.4846	17.901	30.9151	24.3937	7.19735
chr17_15199203_15199227_+	1	0	5	0	1	0	0	0	4	2	2	2	7	0	7	0	9	4	8	2	9	2	0	0	1	1	15.2207	0	21.4402	0	24.1727	0	0	0	11.6349	10.4839	8.44894	11.5992	17.6961	0	15.2733	0	18.4637	11.1208	15.7055	5.967	25.2942	9.75748	0
chr9_36937393_36937396_+	5	15	19	6	15	15	6	6	92	39	55	32	103	55	64	42	80	47	87	48	88	31	0	1	38	14	76.1035	70.4685	81.4727	12.4192	362.59	669.673	746.083	240.01	267.604	204.436	232.346	185.588	260.386	202.279	139.642	171.514	164.122	130.67	170.797	143.208	247.321	151.241	0
chr10_65873159_65873252_+	3	5	16	5	1	0	0	0	17	2	28	4	19	4	15	5	20	6	17	6	18	0	0	0	12	1	45.6621	23.4895	68.6086	10.3493	24.1727	0	0	0	49.4485	10.4839	118.285	23.1985	48.0323	14.7112	32.7285	20.4183	41.0305	16.6812	33.3742	17.901	50.5884	0	0
chr19_374546_374565_-	1	2	11	8	1	0	0	0	18	5	13	1	14	4	33	1	25	0	31	5	30	1	1	0	11	6	15.2207	9.3958	47.1684	16.5589	24.1727	0	0	0	52.3572	26.2097	54.9181	5.79962	35.3922	14.7112	72.0027	4.08367	51.2882	0	60.8588	14.9175	84.314	4.87874	7.19735
chr3_43979055_43979057_+	12	17	61	20	10	5	5	8	110	50	84	41	136	52	111	52	131	78	150	77	125	57	16	7	66	22	182.648	79.8643	261.57	41.3972	241.727	223.224	621.736	320.013	319.961	262.097	354.856	237.785	343.81	191.245	242.191	212.351	268.75	216.856	294.478	229.729	351.308	278.088	115.158
chr11_56282870_56282871_+	2	1	7	1	0	0	0	1	7	4	9	6	8	4	10	11	10	4	13	11	12	6	0	0	2	0	30.4414	4.6979	30.0163	2.06986	0	0	0	40.0016	20.3611	20.9678	38.0202	34.7977	20.2241	14.7112	21.819	44.9203	20.5153	11.1208	25.5214	32.8185	33.7256	29.2724	0
chr13_107830795_107830797_+	4	3	5	1	0	1	0	0	3	7	2	5	4	11	4	3	3	4	4	14	0	4	1	1	4	7	60.8828	14.0937	21.4402	2.06986	0	44.6449	0	0	8.72621	36.6936	8.44894	28.9981	10.1121	40.4558	8.7276	12.251	6.15458	11.1208	7.85275	41.769	0	19.515	7.19735
chr7_23347506_23347509_-	18	25	17	25	18	22	7	19	44	55	29	48	47	62	39	64	46	68	39	61	45	61	0	0	23	25	273.973	117.448	72.8966	51.7465	435.108	982.187	870.43	760.03	127.984	288.307	122.51	278.382	118.817	228.023	85.0941	261.355	94.3702	189.054	76.5643	181.993	126.471	297.603	0
chr13_96331897_96331996_+	1	1	3	1	0	0	0	0	3	4	2	0	2	1	4	4	5	0	3	1	5	2	0	0	9	2	15.2207	4.6979	12.8641	2.06986	0	0	0	0	8.72621	20.9678	8.44894	0	5.05603	3.6778	8.7276	16.3347	10.2576	0	5.88956	2.9835	14.0523	9.75748	0
chr13_107782486_107782487_+	4	0	2	0	0	0	0	1	2	5	0	4	3	11	2	6	1	6	4	9	0	5	0	0	0	2	60.8828	0	8.57607	0	0	0	0	40.0016	5.81747	26.2097	0	23.1985	7.58405	40.4558	4.3638	24.502	2.05153	16.6812	7.85275	26.8515	0	24.3937	0
chr17_21515170_21515230_+	6	5	12	10	1	0	0	0	9	5	6	7	14	7	14	8	16	13	17	13	15	9	3	1	18	7	91.3242	23.4895	51.4564	20.6986	24.1727	0	0	0	26.1786	26.2097	25.3468	40.5974	35.3922	25.7446	30.5466	32.6693	32.8244	36.1426	33.3742	38.7855	42.157	43.9087	21.5921
chr6_136495130_136495134_-	5	10	15	14	9	2	1	3	90	14	45	16	75	16	84	20	86	34	104	22	85	28	1	0	33	13	76.1035	46.979	64.3205	28.9781	217.554	89.2897	124.347	120.005	261.786	73.3872	190.101	92.794	189.601	58.8447	183.28	81.6733	176.431	94.5269	204.171	65.637	238.89	136.605	7.19735
chr4_149764431_149764433_-	6	7	2	2	0	0	0	2	8	10	5	14	7	24	9	12	8	22	7	20	4	15	0	0	10	13	91.3242	32.8853	8.57607	4.13972	0	0	0	80.0032	23.2699	52.4194	21.1224	81.1947	17.6961	88.2671	19.6371	49.004	16.4122	61.1645	13.7423	59.67	11.2419	73.1811	0
chr1_95071806_95071807_+	4	2	1	0	0	0	0	0	0	0	0	1	0	6	0	1	0	6	0	4	0	4	0	0	1	7	60.8828	9.3958	4.28804	0	0	0	0	0	0	0	0	5.79962	0	22.0668	0	4.08367	0	16.6812	0	11.934	0	19.515	0
chr11_80722050_80722115_+	7	13	43	29	1	2	0	1	40	14	17	19	43	22	34	18	48	25	69	29	38	16	8	2	44	14	106.545	61.0727	184.386	60.026	24.1727	89.2897	0	40.0016	116.349	73.3872	71.816	110.193	108.705	80.9115	74.1846	73.506	98.4733	69.5051	135.46	86.5214	106.798	78.0598	57.5788
chr1_157217401_157217435_-	2	6	3	5	28	14	4	15	82	117	56	117	89	133	125	139	119	168	136	210	113	150	4	3	61	51	30.4414	28.1874	12.8641	10.3493	676.835	625.028	497.389	600.024	238.516	613.307	236.57	678.556	224.993	489.147	272.738	567.63	244.132	467.074	266.993	626.535	317.583	731.811	28.7894
chr16_13071943_13072011_-	2	0	2	1	0	0	0	0	5	0	2	3	0	3	1	4	4	5	5	1	1	1	0	0	7	1	30.4414	0	8.57607	2.06986	0	0	0	0	14.5437	0	8.44894	17.3989	0	11.0334	2.1819	16.3347	8.2061	13.901	9.81593	2.9835	2.81047	4.87874	0
chr18_64163543_64163544_-	0	0	5	0	1	0	0	0	2	0	2	0	2	0	3	1	2	0	4	1	1	0	0	0	3	1	0	0	21.4402	0	24.1727	0	0	0	5.81747	0	8.44894	0	5.05603	0	6.5457	4.08367	4.10305	0	7.85275	2.9835	2.81047	0	0
chr1_249086235_249086253_+	2	2	1	0	2	3	0	1	24	9	13	7	24	10	29	5	35	6	33	9	23	9	0	0	11	5	30.4414	9.3958	4.28804	0	48.3454	133.935	0	40.0016	69.8097	47.1775	54.9181	40.5974	60.6724	36.778	63.2751	20.4183	71.8034	16.6812	64.7851	26.8515	64.6407	43.9087	0
chr2_224322080_224322149_-	2	2	8	6	0	1	0	1	7	2	4	1	10	9	5	1	5	5	17	3	5	6	3	0	15	6	30.4414	9.3958	34.3043	12.4192	0	44.6449	0	40.0016	20.3611	10.4839	16.8979	5.79962	25.2802	33.1002	10.9095	4.08367	10.2576	13.901	33.3742	8.95049	14.0523	29.2724	21.5921
chr6_72670998_72671089_+	1	0	7	2	1	0	0	0	4	2	7	3	15	4	17	4	14	0	17	3	13	5	0	0	2	1	15.2207	0	30.0163	4.13972	24.1727	0	0	0	11.6349	10.4839	29.5713	17.3989	37.9203	14.7112	37.0923	16.3347	28.7214	0	33.3742	8.95049	36.536	24.3937	0
chr7_73543327_73543331_-	1	0	3	1	0	0	1	1	9	2	8	4	8	9	9	1	8	7	19	10	3	3	0	0	6	1	15.2207	0	12.8641	2.06986	0	0	124.347	40.0016	26.1786	10.4839	33.7958	23.1985	20.2241	33.1002	19.6371	4.08367	16.4122	19.4614	37.3005	29.835	8.4314	14.6362	0
chr15_87112986_87113042_-	1	0	1	0	2	0	0	0	8	4	11	9	17	11	12	7	13	10	12	15	10	8	0	0	11	0	15.2207	0	4.28804	0	48.3454	0	0	0	23.2699	20.9678	46.4692	52.1966	42.9763	40.4558	26.1828	28.5857	26.6698	27.802	23.5582	44.7525	28.1047	39.0299	0
chr1_120509069_120509139_+	15	15	34	49	7	6	2	5	48	47	45	53	50	68	64	79	55	83	106	115	39	87	0	0	17	16	228.311	70.4685	145.793	101.423	169.209	267.869	248.694	200.008	139.619	246.371	190.101	307.38	126.401	250.09	139.642	322.61	112.834	230.757	208.098	343.102	109.608	424.45	0
chr10_83078857_83078873_-	2	0	2	0	0	1	0	0	1	7	1	5	1	9	1	7	4	14	1	14	1	8	1	0	1	9	30.4414	0	8.57607	0	0	44.6449	0	0	2.90874	36.6936	4.22447	28.9981	2.52802	33.1002	2.1819	28.5857	8.2061	38.9228	1.96319	41.769	2.81047	39.0299	7.19735
chr10_83676619_83676620_+	0	0	3	0	0	0	0	0	0	1	1	1	4	2	2	1	1	6	1	0	4	1	0	0	4	2	0	0	12.8641	0	0	0	0	0	0	5.24194	4.22447	5.79962	10.1121	7.35559	4.3638	4.08367	2.05153	16.6812	1.96319	0	11.2419	4.87874	0
chr12_5804514_5804611_+	3	4	17	15	2	0	0	0	34	10	10	7	41	17	28	6	35	16	29	7	26	10	2	1	32	5	45.6621	18.7916	72.8966	31.0479	48.3454	0	0	0	98.897	52.4194	42.2447	40.5974	103.649	62.5225	61.0932	24.502	71.8034	44.4832	56.9324	20.8845	73.0721	48.7874	14.3947
chr1_207354414_207354415_+	3	5	11	11	2	0	0	2	15	8	13	13	19	14	10	7	16	13	14	17	26	14	1	0	16	15	45.6621	23.4895	47.1684	22.7685	48.3454	0	0	80.0032	43.631	41.9355	54.9181	75.3951	48.0323	51.4891	21.819	28.5857	32.8244	36.1426	27.4846	50.7195	73.0721	68.3023	7.19735
chr1_201615463_201615465_-	8	5	18	13	0	0	0	0	8	6	1	4	6	2	1	1	4	1	11	3	3	0	11	1	34	11	121.766	23.4895	77.1846	26.9082	0	0	0	0	23.2699	31.4517	4.22447	23.1985	15.1681	7.35559	2.1819	4.08367	8.2061	2.7802	21.595	8.95049	8.4314	0	79.1709
chr3_105653215_105653240_-	13	20	32	19	2	3	0	8	33	56	12	45	57	76	17	35	35	71	43	61	36	51	6	5	34	20	197.869	93.958	137.217	39.3274	48.3454	133.935	0	320.013	95.9883	293.549	50.6937	260.983	144.097	279.512	37.0923	142.928	71.8034	197.394	84.417	181.993	101.177	248.816	43.1841
chr18_32063703_32063786_+	2	2	10	6	0	0	1	0	13	2	7	6	9	7	10	3	10	7	16	7	9	3	3	0	10	7	30.4414	9.3958	42.8804	12.4192	0	0	124.347	0	37.8136	10.4839	29.5713	34.7977	22.7522	25.7446	21.819	12.251	20.5153	19.4614	31.411	20.8845	25.2942	14.6362	21.5921
chr9_62229789_62229870_+	5	2	6	2	2	0	0	2	5	11	9	4	5	17	7	14	9	26	10	21	0	23	0	2	1	10	76.1035	9.3958	25.7282	4.13972	48.3454	0	0	80.0032	14.5437	57.6614	38.0202	23.1985	12.6401	62.5225	15.2733	57.1713	18.4637	72.2853	19.6319	62.6535	0	112.211	0
chr10_64310845_64310847_-	1	4	25	20	3	0	0	2	45	17	24	15	26	19	32	11	34	18	38	24	37	11	3	2	39	16	15.2207	18.7916	107.201	41.3972	72.5181	0	0	80.0032	130.893	89.113	101.387	86.9943	65.7284	69.8781	69.8208	44.9203	69.7519	50.0436	74.6011	71.604	103.987	53.6661	21.5921
chr18_32172817_32172853_+	0	1	9	2	0	0	0	0	10	3	6	4	5	1	7	1	10	3	11	0	7	3	0	1	10	1	0	4.6979	38.5923	4.13972	0	0	0	0	29.0874	15.7258	25.3468	23.1985	12.6401	3.6778	15.2733	4.08367	20.5153	8.34061	21.595	0	19.6733	14.6362	0
chr14_83449397_83449398_-	4	1	6	5	2	0	0	0	16	1	7	3	13	4	14	3	20	3	11	2	10	5	0	0	5	2	60.8828	4.6979	25.7282	10.3493	48.3454	0	0	0	46.5398	5.24194	29.5713	17.3989	32.8642	14.7112	30.5466	12.251	41.0305	8.34061	21.595	5.967	28.1047	24.3937	0
chr1_86171844_86171915_-	11	11	9	15	1	3	0	1	16	24	6	25	18	50	21	38	17	56	13	50	11	35	2	0	19	27	167.428	51.6769	38.5923	31.0479	24.1727	133.935	0	40.0016	46.5398	125.807	25.3468	144.991	45.5043	183.89	45.8199	155.179	34.8759	155.691	25.5214	149.175	30.9151	170.756	14.3947
chr17_20896355_20896432_-	5	3	7	1	1	0	0	0	1	3	1	2	3	4	3	4	2	3	2	1	3	4	1	1	5	2	76.1035	14.0937	30.0163	2.06986	24.1727	0	0	0	2.90874	15.7258	4.22447	11.5992	7.58405	14.7112	6.5457	16.3347	4.10305	8.34061	3.92637	2.9835	8.4314	19.515	7.19735
chr4_48658929_48659005_-	16	10	8	10	8	4	1	6	18	45	12	44	21	80	14	53	11	92	10	69	6	52	4	1	13	15	243.531	46.979	34.3043	20.6986	193.382	178.579	124.347	240.01	52.3572	235.887	50.6937	255.183	53.0884	294.224	30.5466	216.434	22.5668	255.779	19.6319	205.861	16.8628	253.694	28.7894
chr4_160650043_160650067_-	2	2	1	0	0	1	0	1	0	9	2	10	3	29	1	17	2	29	2	18	0	16	0	0	2	12	30.4414	9.3958	4.28804	0	0	44.6449	0	40.0016	0	47.1775	8.44894	57.9962	7.58405	106.656	2.1819	69.4223	4.10305	80.6259	3.92637	53.703	0	78.0598	0
chr1_204377866_204377870_+	2	1	7	0	0	3	0	0	0	1	0	0	1	1	2	0	4	4	4	4	0	1	0	0	1	0	30.4414	4.6979	30.0163	0	0	133.935	0	0	0	5.24194	0	0	2.52802	3.6778	4.3638	0	8.2061	11.1208	7.85275	11.934	0	4.87874	0
chr12_26144177_26144219_+	2	3	13	4	0	0	0	0	4	0	0	1	3	1	2	2	9	2	9	3	4	3	0	0	13	0	30.4414	14.0937	55.7445	8.27945	0	0	0	0	11.6349	0	0	5.79962	7.58405	3.6778	4.3638	8.16733	18.4637	5.56041	17.6687	8.95049	11.2419	14.6362	0
chr4_6734191_6734274_+	2	1	13	7	4	0	0	0	22	2	12	1	25	2	32	8	38	5	59	7	25	9	0	0	6	0	30.4414	4.6979	55.7445	14.489	96.6908	0	0	0	63.9922	10.4839	50.6937	5.79962	63.2004	7.35559	69.8208	32.6693	77.958	13.901	115.828	20.8845	70.2616	43.9087	0
chr8_62443905_62443971_+	29	20	8	2	3	1	0	1	12	52	7	40	10	83	13	39	18	89	18	80	15	59	6	3	9	37	441.4	93.958	34.3043	4.13972	72.5181	44.6449	0	40.0016	34.9048	272.581	29.5713	231.985	25.2802	305.257	28.3647	159.263	36.9275	247.438	35.3374	238.68	42.157	287.846	43.1841
chr16_73336382_73336388_-	3	0	2	1	0	1	0	3	9	12	6	7	11	11	5	11	12	17	4	11	3	6	0	1	4	4	45.6621	0	8.57607	2.06986	0	44.6449	0	120.005	26.1786	62.9033	25.3468	40.5974	27.8082	40.4558	10.9095	44.9203	24.6183	47.2634	7.85275	32.8185	8.4314	29.2724	0
chr6_41576080_41576081_+	2	1	5	3	0	0	0	0	2	1	1	0	2	0	3	1	3	1	1	0	1	0	0	0	6	2	30.4414	4.6979	21.4402	6.20959	0	0	0	0	5.81747	5.24194	4.22447	0	5.05603	0	6.5457	4.08367	6.15458	2.7802	1.96319	0	2.81047	0	0
chr10_107220855_107220935_+	1	2	5	2	5	2	0	5	27	4	18	7	39	9	46	24	53	30	52	14	36	10	0	0	6	5	15.2207	9.3958	21.4402	4.13972	120.863	89.2897	0	200.008	78.5359	20.9678	76.0405	40.5974	98.5927	33.1002	100.367	98.008	108.731	83.4061	102.086	41.769	101.177	48.7874	0
chr5_156730261_156730298_+	10	10	4	5	0	1	0	0	2	11	2	18	3	29	0	9	1	25	3	29	0	17	0	1	5	22	152.207	46.979	17.1521	10.3493	0	44.6449	0	0	5.81747	57.6614	8.44894	104.393	7.58405	106.656	0	36.753	2.05153	69.5051	5.88956	86.5214	0	82.9386	0
chr9_52596211_52596213_-	1	0	3	0	0	0	0	0	0	0	1	0	0	2	2	0	4	2	4	1	5	1	0	0	2	1	15.2207	0	12.8641	0	0	0	0	0	0	0	4.22447	0	0	7.35559	4.3638	0	8.2061	5.56041	7.85275	2.9835	14.0523	4.87874	0
chr9_65829103_65829111_-	0	0	2	0	0	0	0	0	0	1	3	2	2	0	2	4	1	2	3	10	3	1	0	0	5	3	0	0	8.57607	0	0	0	0	0	0	5.24194	12.6734	11.5992	5.05603	0	4.3638	16.3347	2.05153	5.56041	5.88956	29.835	8.4314	4.87874	0
chr15_45024191_45024220_+	25	30	105	46	39	13	6	24	154	81	122	71	159	84	170	91	159	101	182	110	153	74	25	0	81	28	380.518	140.937	450.244	95.2137	942.735	580.383	746.083	960.038	447.945	424.597	515.386	411.773	401.955	308.935	370.923	371.614	326.193	280.8	357.3	328.185	430.001	361.027	179.934
chr13_96317154_96317239_+	2	6	21	10	0	1	0	0	18	4	8	8	22	7	14	5	13	9	18	12	18	8	1	0	12	5	30.4414	28.1874	90.0488	20.6986	0	44.6449	0	0	52.3572	20.9678	33.7958	46.397	55.6164	25.7446	30.5466	20.4183	26.6698	25.0218	35.3374	35.802	50.5884	39.0299	7.19735
chr6_80454232_80454326_+	2	0	7	4	1	0	0	1	15	0	12	2	9	5	20	1	26	10	37	1	20	1	0	0	4	1	30.4414	0	30.0163	8.27945	24.1727	0	0	40.0016	43.631	0	50.6937	11.5992	22.7522	18.389	43.638	4.08367	53.3397	27.802	72.6379	2.9835	56.2093	4.87874	0
chr5_155220695_155220780_+	6	8	18	26	7	1	4	2	74	19	52	16	82	28	72	24	81	27	95	27	75	22	0	0	46	10	91.3242	37.5832	77.1846	53.8164	169.209	44.6449	497.389	80.0032	215.246	99.5969	219.673	92.794	207.297	102.978	157.097	98.008	166.174	75.0655	186.503	80.5545	210.785	107.332	0
chr7_27506471_27506552_+	1	2	29	18	4	0	0	0	28	10	20	10	38	7	38	16	48	20	48	20	35	7	5	0	20	5	15.2207	9.3958	124.353	37.2575	96.6908	0	0	0	81.4446	52.4194	84.4894	57.9962	96.0646	25.7446	82.9122	65.3387	98.4733	55.6041	94.2329	59.67	98.3663	34.1512	35.9868
chr17_85848573_85848596_+	0	1	18	13	4	0	1	2	31	6	21	4	29	9	48	7	51	12	41	12	45	5	0	0	18	2	0	4.6979	77.1846	26.9082	96.6908	0	124.347	80.0032	90.1708	31.4517	88.7139	23.1985	73.3125	33.1002	104.731	28.5857	104.628	33.3624	80.4906	35.802	126.471	24.3937	0
chr3_12822235_12822306_-	1	0	3	2	0	0	0	0	1	2	0	1	1	1	12	7	5	9	1	1	0	0	0	0	6	4	15.2207	0	12.8641	4.13972	0	0	0	0	2.90874	10.4839	0	5.79962	2.52802	3.6778	26.1828	28.5857	10.2576	25.0218	1.96319	2.9835	0	0	0
chr1_95072132_95072135_+	15	14	6	6	0	3	0	2	3	12	1	15	4	23	5	16	9	34	4	33	4	19	0	0	8	8	228.311	65.7706	25.7282	12.4192	0	133.935	0	80.0032	8.72621	62.9033	4.22447	86.9943	10.1121	84.5893	10.9095	65.3387	18.4637	94.5269	7.85275	98.4554	11.2419	92.696	0
chr2_245076804_245076809_+	0	0	9	4	0	0	0	0	4	0	3	0	5	2	1	0	8	1	4	1	9	0	0	0	6	1	0	0	38.5923	8.27945	0	0	0	0	11.6349	0	12.6734	0	12.6401	7.35559	2.1819	0	16.4122	2.7802	7.85275	2.9835	25.2942	0	0
chr15_96049598_96049684_+	0	0	6	0	3	0	0	0	19	3	20	3	27	3	9	0	7	6	21	2	8	1	0	0	5	0	0	0	25.7282	0	72.5181	0	0	0	55.266	15.7258	84.4894	17.3989	68.2565	11.0334	19.6371	0	14.3607	16.6812	41.2269	5.967	22.4837	4.87874	0
chr15_85912472_85912540_+	1	1	7	2	1	0	0	0	11	3	7	5	12	5	3	0	4	6	9	6	6	2	0	1	6	2	15.2207	4.6979	30.0163	4.13972	24.1727	0	0	0	31.9961	15.7258	29.5713	28.9981	30.3362	18.389	6.5457	0	8.2061	16.6812	17.6687	17.901	16.8628	9.75748	0
chr1_122384998_122385087_-	1	1	3	1	0	0	0	0	3	2	4	1	3	0	7	1	5	1	5	0	6	0	0	0	8	2	15.2207	4.6979	12.8641	2.06986	0	0	0	0	8.72621	10.4839	16.8979	5.79962	7.58405	0	15.2733	4.08367	10.2576	2.7802	9.81593	0	16.8628	0	0
chr9_92718588_92718672_-	2	2	15	9	2	0	0	0	13	3	6	1	18	2	16	2	24	7	21	6	8	5	0	0	5	1	30.4414	9.3958	64.3205	18.6288	48.3454	0	0	0	37.8136	15.7258	25.3468	5.79962	45.5043	7.35559	34.9104	8.16733	49.2366	19.4614	41.2269	17.901	22.4837	24.3937	0
chr1_5734638_5734721_-	0	0	3	0	0	0	0	0	3	3	6	1	4	1	2	0	5	3	5	3	4	0	0	0	4	2	0	0	12.8641	0	0	0	0	0	8.72621	15.7258	25.3468	5.79962	10.1121	3.6778	4.3638	0	10.2576	8.34061	9.81593	8.95049	11.2419	0	0
chr14_86450363_86450447_+	4	6	35	44	8	2	1	1	108	27	68	20	114	34	148	46	154	38	163	60	164	47	2	0	46	9	60.8828	28.1874	150.081	91.0739	193.382	89.2897	124.347	40.0016	314.143	141.532	287.264	115.992	288.194	125.045	322.921	187.849	315.935	105.648	319.999	179.01	460.916	229.301	14.3947
chr1_53872498_53872556_+	3	3	3	1	2	1	0	0	11	12	6	4	14	9	11	18	15	20	16	13	9	13	0	0	5	5	45.6621	14.0937	12.8641	2.06986	48.3454	44.6449	0	0	31.9961	62.9033	25.3468	23.1985	35.3922	33.1002	24.0009	73.506	30.7729	55.6041	31.411	38.7855	25.2942	63.4236	0
chr18_30714498_30714499_+	3	5	6	4	0	1	0	0	9	8	7	8	6	12	12	18	8	15	13	17	13	13	0	0	11	7	45.6621	23.4895	25.7282	8.27945	0	44.6449	0	0	26.1786	41.9355	29.5713	46.397	15.1681	44.1335	26.1828	73.506	16.4122	41.703	25.5214	50.7195	36.536	63.4236	0
chr16_19774070_19774114_-	1	2	6	3	1	1	0	2	13	2	10	2	27	3	38	2	21	9	24	2	26	2	0	0	9	3	15.2207	9.3958	25.7282	6.20959	24.1727	44.6449	0	80.0032	37.8136	10.4839	42.2447	11.5992	68.2565	11.0334	82.9122	8.16733	43.082	25.0218	47.1165	5.967	73.0721	9.75748	0
chr17_29177308_29177360_+	1	0	3	1	0	0	0	0	2	2	4	1	13	3	15	1	15	4	14	4	4	4	1	0	10	1	15.2207	0	12.8641	2.06986	0	0	0	0	5.81747	10.4839	16.8979	5.79962	32.8642	11.0334	32.7285	4.08367	30.7729	11.1208	27.4846	11.934	11.2419	19.515	7.19735
chr1_80297557_80297559_-	7	2	1	1	1	1	0	0	3	11	1	6	3	13	1	13	4	14	0	16	1	13	0	1	0	10	106.545	9.3958	4.28804	2.06986	24.1727	44.6449	0	0	8.72621	57.6614	4.22447	34.7977	7.58405	47.8113	2.1819	53.0877	8.2061	38.9228	0	47.736	2.81047	63.4236	0
chr1_199339910_199339985_+	1	2	7	3	1	0	0	1	14	3	15	6	20	8	24	7	16	14	26	12	11	8	3	0	11	9	15.2207	9.3958	30.0163	6.20959	24.1727	0	0	40.0016	40.7223	15.7258	63.3671	34.7977	50.5603	29.4224	52.3656	28.5857	32.8244	38.9228	51.0428	35.802	30.9151	39.0299	21.5921
chr13_2293945_2293948_-	3	1	7	3	3	0	0	1	15	12	12	12	23	17	17	21	17	22	23	26	15	19	1	1	4	4	45.6621	4.6979	30.0163	6.20959	72.5181	0	0	40.0016	43.631	62.9033	50.6937	69.5955	58.1444	62.5225	37.0923	85.757	34.8759	61.1645	45.1533	77.571	42.157	92.696	7.19735
chr9_19993374_19993431_+	1	0	6	2	1	0	0	0	8	5	3	2	2	4	2	5	3	11	8	14	2	7	0	0	3	1	15.2207	0	25.7282	4.13972	24.1727	0	0	0	23.2699	26.2097	12.6734	11.5992	5.05603	14.7112	4.3638	20.4183	6.15458	30.5822	15.7055	41.769	5.62093	34.1512	0
chr10_7055515_7055550_-	2	0	2	1	0	0	0	0	3	2	1	2	2	6	5	4	7	3	2	3	2	2	0	0	4	2	30.4414	0	8.57607	2.06986	0	0	0	0	8.72621	10.4839	4.22447	11.5992	5.05603	22.0668	10.9095	16.3347	14.3607	8.34061	3.92637	8.95049	5.62093	9.75748	0
chr7_55589974_55590029_+	6	2	2	1	2	1	0	0	9	12	6	6	13	18	11	19	11	20	12	23	9	16	1	0	7	3	91.3242	9.3958	8.57607	2.06986	48.3454	44.6449	0	0	26.1786	62.9033	25.3468	34.7977	32.8642	66.2003	24.0009	77.5897	22.5668	55.6041	23.5582	68.6205	25.2942	78.0598	7.19735
chr9_8570766_8570798_+	2	0	5	0	0	0	0	0	3	0	1	0	6	4	8	0	3	2	4	0	4	4	0	0	1	0	30.4414	0	21.4402	0	0	0	0	0	8.72621	0	4.22447	0	15.1681	14.7112	17.4552	0	6.15458	5.56041	7.85275	0	11.2419	19.515	0
chr3_8982860_8982918_+	2	2	17	20	1	0	1	0	15	7	11	8	29	13	25	6	31	9	40	6	21	9	4	0	31	8	30.4414	9.3958	72.8966	41.3972	24.1727	0	124.347	0	43.631	36.6936	46.4692	46.397	73.3125	47.8113	54.5475	24.502	63.5973	25.0218	78.5275	17.901	59.0198	43.9087	28.7894
chr10_37827559_37827601_+	4	10	18	5	2	1	0	1	13	20	21	8	26	29	41	33	32	29	36	32	25	27	0	0	8	6	60.8828	46.979	77.1846	10.3493	48.3454	44.6449	0	40.0016	37.8136	104.839	88.7139	46.397	65.7284	106.656	89.4579	134.761	65.6488	80.6259	70.6747	95.4719	70.2616	131.726	0
chr10_52892810_52892812_-	2	0	2	1	0	1	0	1	0	1	4	1	3	7	3	5	2	4	3	5	0	3	0	0	2	4	30.4414	0	8.57607	2.06986	0	44.6449	0	40.0016	0	5.24194	16.8979	5.79962	7.58405	25.7446	6.5457	20.4183	4.10305	11.1208	5.88956	14.9175	0	14.6362	0
chr8_71352616_71352618_-	0	2	8	0	1	0	0	0	11	3	12	2	12	6	20	6	14	7	17	5	13	4	0	0	5	3	0	9.3958	34.3043	0	24.1727	0	0	0	31.9961	15.7258	50.6937	11.5992	30.3362	22.0668	43.638	24.502	28.7214	19.4614	33.3742	14.9175	36.536	19.515	0
chr4_64371468_64371508_-	1	0	3	1	0	0	0	0	4	2	1	1	5	1	8	2	6	4	4	3	0	1	0	0	3	3	15.2207	0	12.8641	2.06986	0	0	0	0	11.6349	10.4839	4.22447	5.79962	12.6401	3.6778	17.4552	8.16733	12.3092	11.1208	7.85275	8.95049	0	4.87874	0
chr6_71795282_71795289_-	3	1	7	4	2	0	0	0	4	3	9	1	5	2	10	7	7	4	16	3	4	0	0	0	3	1	45.6621	4.6979	30.0163	8.27945	48.3454	0	0	0	11.6349	15.7258	38.0202	5.79962	12.6401	7.35559	21.819	28.5857	14.3607	11.1208	31.411	8.95049	11.2419	0	0
chr7_10816387_10816390_+	9	13	32	19	8	4	1	4	49	26	55	27	73	33	79	38	84	39	81	52	63	31	5	1	31	8	136.986	61.0727	137.217	39.3274	193.382	178.579	124.347	160.006	142.528	136.29	232.346	156.59	184.545	121.367	172.37	155.179	172.328	108.428	159.018	155.142	177.059	151.241	35.9868
chr7_9886689_9886787_-	1	1	7	5	0	0	0	0	4	3	4	0	0	5	6	0	3	9	2	4	1	2	1	0	12	3	15.2207	4.6979	30.0163	10.3493	0	0	0	0	11.6349	15.7258	16.8979	0	0	18.389	13.0914	0	6.15458	25.0218	3.92637	11.934	2.81047	9.75748	7.19735
chr12_32333171_32333206_+	5	10	53	25	24	1	3	6	106	24	75	23	111	31	145	25	125	30	135	31	105	25	21	4	78	21	76.1035	46.979	227.266	51.7465	580.145	44.6449	373.042	240.01	308.326	125.807	316.835	133.391	280.61	114.012	316.376	102.092	256.441	83.4061	265.03	92.4884	295.099	121.968	151.144
chr12_26139675_26139737_+	0	1	5	0	0	0	0	0	8	2	1	1	6	0	6	4	9	2	7	0	1	1	0	0	5	1	0	4.6979	21.4402	0	0	0	0	0	23.2699	10.4839	4.22447	5.79962	15.1681	0	13.0914	16.3347	18.4637	5.56041	13.7423	0	2.81047	4.87874	0
chrX_56589239_56589317_-	6	5	15	11	2	0	0	0	14	10	14	17	14	17	6	6	9	12	23	26	17	8	2	1	8	6	91.3242	23.4895	64.3205	22.7685	48.3454	0	0	0	40.7223	52.4194	59.1426	98.5936	35.3922	62.5225	13.0914	24.502	18.4637	33.3624	45.1533	77.571	47.7779	39.0299	14.3947
chr18_56919774_56919822_+	1	1	4	2	1	0	0	1	9	8	4	12	9	17	4	7	5	16	4	16	5	8	2	2	10	16	15.2207	4.6979	17.1521	4.13972	24.1727	0	0	40.0016	26.1786	41.9355	16.8979	69.5955	22.7522	62.5225	8.7276	28.5857	10.2576	44.4832	7.85275	47.736	14.0523	39.0299	14.3947
chr8_73802363_73802364_+	0	0	3	0	0	0	0	0	3	1	0	1	1	1	0	0	0	0	2	2	2	0	0	0	3	3	0	0	12.8641	0	0	0	0	0	8.72621	5.24194	0	5.79962	2.52802	3.6778	0	0	0	0	3.92637	5.967	5.62093	0	0
chr13_78400600_78400682_-	3	4	31	33	3	0	1	2	62	8	17	9	65	10	57	15	83	10	73	15	78	11	2	0	27	8	45.6621	18.7916	132.929	68.3054	72.5181	0	124.347	80.0032	180.342	41.9355	71.816	52.1966	164.321	36.778	124.368	61.255	170.277	27.802	143.313	44.7525	219.216	53.6661	14.3947
chr6_26343661_26343663_+	0	0	9	7	0	0	0	0	2	2	4	5	5	2	6	0	3	2	4	4	3	2	0	0	12	4	0	0	38.5923	14.489	0	0	0	0	5.81747	10.4839	16.8979	28.9981	12.6401	7.35559	13.0914	0	6.15458	5.56041	7.85275	11.934	8.4314	9.75748	0
chr1_205941219_205941229_-	2	2	8	3	0	1	0	0	12	10	9	7	7	9	13	25	16	14	25	30	19	20	0	0	2	5	30.4414	9.3958	34.3043	6.20959	0	44.6449	0	0	34.9048	52.4194	38.0202	40.5974	17.6961	33.1002	28.3647	102.092	32.8244	38.9228	49.0797	89.5049	53.3988	97.5748	0
chr13_82141495_82141562_-	0	1	6	0	1	0	0	2	9	3	5	3	7	3	13	7	23	6	27	2	9	2	0	0	5	1	0	4.6979	25.7282	0	24.1727	0	0	80.0032	26.1786	15.7258	21.1224	17.3989	17.6961	11.0334	28.3647	28.5857	47.1851	16.6812	53.006	5.967	25.2942	9.75748	0
chr4_160662193_160662194_-	3	0	0	0	0	0	0	0	0	2	0	2	1	2	1	2	1	6	3	5	0	4	0	0	4	2	45.6621	0	0	0	0	0	0	0	0	10.4839	0	11.5992	2.52802	7.35559	2.1819	8.16733	2.05153	16.6812	5.88956	14.9175	0	19.515	0
chr18_32323586_32323651_+	1	0	6	2	0	0	0	1	4	1	0	2	5	2	10	3	10	7	5	2	6	1	0	1	5	2	15.2207	0	25.7282	4.13972	0	0	0	40.0016	11.6349	5.24194	0	11.5992	12.6401	7.35559	21.819	12.251	20.5153	19.4614	9.81593	5.967	16.8628	4.87874	0
chr16_19425356_19425403_+	27	31	168	131	30	4	9	21	177	43	155	47	211	48	262	62	243	73	250	91	221	55	28	1	124	26	410.959	145.635	720.39	271.152	725.181	178.579	1119.12	840.034	514.846	225.403	654.793	272.582	533.412	176.534	571.658	253.187	498.521	202.955	490.797	271.498	621.113	268.331	201.526
chr13_68735995_68735997_+	1	5	16	4	3	2	2	2	21	13	10	16	30	27	22	18	29	21	32	22	32	12	1	0	13	4	15.2207	23.4895	68.6086	8.27945	72.5181	89.2897	248.694	80.0032	61.0834	68.1452	42.2447	92.794	75.8405	99.3005	48.0018	73.506	59.4943	58.3843	62.822	65.637	89.9349	58.5449	7.19735
chr5_58100798_58100801_+	5	13	90	93	22	2	8	9	145	18	119	21	179	28	166	25	167	32	209	37	181	26	2	0	81	16	76.1035	61.0727	385.923	192.497	531.799	89.2897	994.777	360.014	421.767	94.355	502.712	121.792	452.515	102.978	362.196	102.092	342.605	88.9665	410.306	110.389	508.694	126.847	14.3947
chr19_9813037_9813054_-	2	0	8	5	1	0	0	1	2	2	3	0	7	1	8	2	9	6	2	1	1	3	0	0	8	0	30.4414	0	34.3043	10.3493	24.1727	0	0	40.0016	5.81747	10.4839	12.6734	0	17.6961	3.6778	17.4552	8.16733	18.4637	16.6812	3.92637	2.9835	2.81047	14.6362	0
chr7_124157947_124158045_-	3	9	19	14	3	1	0	1	23	14	12	8	18	17	23	14	18	27	41	20	26	18	5	3	40	24	45.6621	42.2811	81.4727	28.9781	72.5181	44.6449	0	40.0016	66.9009	73.3872	50.6937	46.397	45.5043	62.5225	50.1837	57.1713	36.9275	75.0655	80.4906	59.67	73.0721	87.8173	35.9868
chr10_16816018_16816093_-	2	0	2	0	1	1	0	0	0	1	1	5	4	6	3	6	2	11	1	8	1	4	0	0	2	1	30.4414	0	8.57607	0	24.1727	44.6449	0	0	0	5.24194	4.22447	28.9981	10.1121	22.0668	6.5457	24.502	4.10305	30.5822	1.96319	23.868	2.81047	19.515	0
chr13_98249619_98249692_-	10	17	10	5	5	4	0	3	17	31	21	25	17	36	25	34	35	38	37	38	25	33	0	1	8	15	152.207	79.8643	42.8804	10.3493	120.863	178.579	0	120.005	49.4485	162.5	88.7139	144.991	42.9763	132.401	54.5475	138.845	71.8034	105.648	72.6379	113.373	70.2616	160.998	0
chr19_11622634_11622647_-	2	4	18	17	2	0	0	0	9	6	6	4	6	9	12	6	19	5	19	11	15	6	7	1	41	14	30.4414	18.7916	77.1846	35.1877	48.3454	0	0	0	26.1786	31.4517	25.3468	23.1985	15.1681	33.1002	26.1828	24.502	38.979	13.901	37.3005	32.8185	42.157	29.2724	50.3815
chr9_36318972_36319049_+	3	7	9	5	0	0	0	2	7	11	9	11	15	15	3	10	16	19	14	28	8	8	0	2	15	12	45.6621	32.8853	38.5923	10.3493	0	0	0	80.0032	20.3611	57.6614	38.0202	63.7959	37.9203	55.1669	6.5457	40.8367	32.8244	52.8239	27.4846	83.538	22.4837	39.0299	0
chr6_41576110_41576117_+	1	1	11	10	0	0	0	0	13	2	8	6	18	10	16	4	15	15	15	11	13	5	0	0	10	7	15.2207	4.6979	47.1684	20.6986	0	0	0	0	37.8136	10.4839	33.7958	34.7977	45.5043	36.778	34.9104	16.3347	30.7729	41.703	29.4478	32.8185	36.536	24.3937	0
chr11_68374602_68374687_+	1	2	5	1	0	0	0	0	4	8	3	1	7	3	7	6	3	1	9	4	3	3	0	0	5	3	15.2207	9.3958	21.4402	2.06986	0	0	0	0	11.6349	41.9355	12.6734	5.79962	17.6961	11.0334	15.2733	24.502	6.15458	2.7802	17.6687	11.934	8.4314	14.6362	0
chr3_46834041_46834107_-	4	2	11	10	1	3	0	0	32	6	18	9	41	5	7	2	25	10	25	5	25	6	0	0	11	1	60.8828	9.3958	47.1684	20.6986	24.1727	133.935	0	0	93.0795	31.4517	76.0405	52.1966	103.649	18.389	15.2733	8.16733	51.2882	27.802	49.0797	14.9175	70.2616	29.2724	0
chr8_32011844_32011939_+	0	1	6	2	0	0	0	1	6	2	5	1	8	6	10	3	12	7	15	8	8	4	2	0	10	7	0	4.6979	25.7282	4.13972	0	0	0	40.0016	17.4524	10.4839	21.1224	5.79962	20.2241	22.0668	21.819	12.251	24.6183	19.4614	29.4478	23.868	22.4837	19.515	14.3947
chr12_23517423_23517502_+	2	0	2	2	1	0	0	0	6	0	3	2	8	2	6	2	8	1	8	0	4	4	0	0	7	3	30.4414	0	8.57607	4.13972	24.1727	0	0	0	17.4524	0	12.6734	11.5992	20.2241	7.35559	13.0914	8.16733	16.4122	2.7802	15.7055	0	11.2419	19.515	0
chr15_60916250_60916309_-	3	0	2	0	0	0	0	0	1	2	0	0	0	9	0	2	1	3	3	5	1	1	0	0	0	3	45.6621	0	8.57607	0	0	0	0	0	2.90874	10.4839	0	0	0	33.1002	0	8.16733	2.05153	8.34061	5.88956	14.9175	2.81047	4.87874	0
chr1_267477190_267477282_-	1	0	4	1	0	0	0	0	6	0	0	1	1	3	1	0	2	2	5	1	2	0	0	0	3	1	15.2207	0	17.1521	2.06986	0	0	0	0	17.4524	0	0	5.79962	2.52802	11.0334	2.1819	0	4.10305	5.56041	9.81593	2.9835	5.62093	0	0
chr17_89062958_89062988_+	5	3	6	3	0	0	0	1	1	1	3	0	5	0	4	2	6	2	4	2	1	0	0	0	3	1	76.1035	14.0937	25.7282	6.20959	0	0	0	40.0016	2.90874	5.24194	12.6734	0	12.6401	0	8.7276	8.16733	12.3092	5.56041	7.85275	5.967	2.81047	0	0
chr6_101943314_101943364_-	10	18	61	93	45	20	9	29	232	78	197	79	237	95	303	99	314	134	307	107	240	86	2	0	88	33	152.207	84.5622	261.57	192.497	1087.77	892.897	1119.12	1160.05	674.827	408.871	832.221	458.17	599.14	349.391	661.116	404.283	644.179	372.547	602.698	319.234	674.512	419.572	14.3947
chr11_51555833_51555882_+	0	4	21	3	0	0	1	1	30	2	12	2	30	2	46	7	67	4	52	2	37	3	0	0	11	2	0	18.7916	90.0488	6.20959	0	0	124.347	40.0016	87.2621	10.4839	50.6937	11.5992	75.8405	7.35559	100.367	28.5857	137.452	11.1208	102.086	5.967	103.987	14.6362	0
chr1_199383198_199383244_+	1	2	9	3	2	0	0	2	11	7	9	3	22	14	19	2	20	10	19	19	13	6	1	2	13	4	15.2207	9.3958	38.5923	6.20959	48.3454	0	0	80.0032	31.9961	36.6936	38.0202	17.3989	55.6164	51.4891	41.4561	8.16733	41.0305	27.802	37.3005	56.6865	36.536	29.2724	7.19735
chr5_169534942_169534943_+	3	0	2	0	0	0	0	0	0	2	0	2	0	8	0	2	0	5	0	5	0	5	0	0	0	3	45.6621	0	8.57607	0	0	0	0	0	0	10.4839	0	11.5992	0	29.4224	0	8.16733	0	13.901	0	14.9175	0	24.3937	0
chr14_81292682_81292685_+	15	27	24	33	9	6	1	4	39	52	32	43	45	60	78	73	83	100	71	88	41	69	1	0	28	35	228.311	126.843	102.913	68.3054	217.554	267.869	124.347	160.006	113.441	272.581	135.183	249.384	113.761	220.668	170.188	298.108	170.277	278.02	139.386	262.548	115.229	336.633	7.19735
chr4_79836486_79836544_+	0	1	8	2	0	0	0	0	5	3	5	3	4	3	6	0	11	2	16	2	10	2	0	0	6	1	0	4.6979	34.3043	4.13972	0	0	0	0	14.5437	15.7258	21.1224	17.3989	10.1121	11.0334	13.0914	0	22.5668	5.56041	31.411	5.967	28.1047	9.75748	0
chr9_62219646_62219667_+	5	3	1	1	1	1	0	0	3	23	4	14	4	31	3	20	2	35	6	31	2	17	0	2	3	14	76.1035	14.0937	4.28804	2.06986	24.1727	44.6449	0	0	8.72621	120.565	16.8979	81.1947	10.1121	114.012	6.5457	81.6733	4.10305	97.3071	11.7791	92.4884	5.62093	82.9386	0
chr3_44252925_44252938_+	15	6	2	5	0	0	0	0	3	12	2	15	1	27	2	17	1	12	1	20	1	13	0	2	4	12	228.311	28.1874	8.57607	10.3493	0	0	0	0	8.72621	62.9033	8.44894	86.9943	2.52802	99.3005	4.3638	69.4223	2.05153	33.3624	1.96319	59.67	2.81047	63.4236	0
chr4_26908222_26908238_-	0	0	0	0	5	7	2	2	32	1	26	1	38	5	45	6	51	9	60	3	29	8	0	0	14	3	0	0	0	0	120.863	312.514	248.694	80.0032	93.0795	5.24194	109.836	5.79962	96.0646	18.389	98.1855	24.502	104.628	25.0218	117.791	8.95049	81.5035	39.0299	0
chr1_95071665_95071666_+	7	2	4	3	0	0	0	0	2	6	1	5	1	10	0	5	1	7	2	6	2	3	1	1	3	6	106.545	9.3958	17.1521	6.20959	0	0	0	0	5.81747	31.4517	4.22447	28.9981	2.52802	36.778	0	20.4183	2.05153	19.4614	3.92637	17.901	5.62093	14.6362	7.19735
chr18_48712540_48712617_+	2	3	26	22	2	0	0	3	50	6	26	8	43	9	76	14	82	19	89	13	47	10	2	0	15	7	30.4414	14.0937	111.489	45.537	48.3454	0	0	120.005	145.437	31.4517	109.836	46.397	108.705	33.1002	165.824	57.1713	168.225	52.8239	174.724	38.7855	132.092	48.7874	14.3947
chr5_72912469_72912555_+	2	2	4	2	0	1	0	1	3	0	4	1	7	2	8	2	9	2	10	1	3	2	0	0	7	3	30.4414	9.3958	17.1521	4.13972	0	44.6449	0	40.0016	8.72621	0	16.8979	5.79962	17.6961	7.35559	17.4552	8.16733	18.4637	5.56041	19.6319	2.9835	8.4314	9.75748	0
chr9_1973519_1973523_-	1	1	9	3	1	0	0	0	10	5	7	3	12	4	12	3	14	9	16	4	14	4	2	0	7	4	15.2207	4.6979	38.5923	6.20959	24.1727	0	0	0	29.0874	26.2097	29.5713	17.3989	30.3362	14.7112	26.1828	12.251	28.7214	25.0218	31.411	11.934	39.3465	19.515	14.3947
chr4_160657775_160657839_-	10	5	0	1	0	0	0	0	1	17	1	14	2	30	1	24	4	22	5	30	2	13	0	2	0	20	152.207	23.4895	0	2.06986	0	0	0	0	2.90874	89.113	4.22447	81.1947	5.05603	110.334	2.1819	98.008	8.2061	61.1645	9.81593	89.5049	5.62093	63.4236	0
chr10_64309460_64309461_-	1	1	4	1	0	0	0	0	5	0	1	0	5	2	6	0	3	0	9	2	9	2	0	0	5	2	15.2207	4.6979	17.1521	2.06986	0	0	0	0	14.5437	0	4.22447	0	12.6401	7.35559	13.0914	0	6.15458	0	17.6687	5.967	25.2942	9.75748	0
chr6_10415037_10415051_+	6	2	3	0	3	0	0	0	6	0	0	2	3	1	0	0	3	0	6	0	1	0	0	0	0	1	91.3242	9.3958	12.8641	0	72.5181	0	0	0	17.4524	0	0	11.5992	7.58405	3.6778	0	0	6.15458	0	11.7791	0	2.81047	0	0
chr8_67777247_67777300_+	1	1	7	6	7	2	0	1	24	3	12	5	19	14	36	4	44	20	43	10	35	2	0	0	13	3	15.2207	4.6979	30.0163	12.4192	169.209	89.2897	0	40.0016	69.8097	15.7258	50.6937	28.9981	48.0323	51.4891	78.5484	16.3347	90.2671	55.6041	84.417	29.835	98.3663	9.75748	0
chr10_38892519_38892581_-	11	21	120	117	19	4	9	25	130	21	146	40	189	45	174	56	195	58	262	71	213	56	6	0	79	15	167.428	98.6559	514.564	242.174	459.281	178.579	1119.12	1000.04	378.136	110.081	616.773	231.985	477.795	165.501	379.651	228.685	400.048	161.252	514.355	211.828	598.629	273.209	43.1841
chr1_95078679_95078681_+	6	3	11	16	0	2	0	0	5	3	2	7	3	7	5	13	2	19	6	13	8	13	2	0	16	9	91.3242	14.0937	47.1684	33.1178	0	89.2897	0	0	14.5437	15.7258	8.44894	40.5974	7.58405	25.7446	10.9095	53.0877	4.10305	52.8239	11.7791	38.7855	22.4837	63.4236	14.3947
chr3_8997825_8997844_+	0	1	10	7	1	0	0	0	5	2	3	2	8	3	7	1	5	2	13	5	12	1	0	0	11	4	0	4.6979	42.8804	14.489	24.1727	0	0	0	14.5437	10.4839	12.6734	11.5992	20.2241	11.0334	15.2733	4.08367	10.2576	5.56041	25.5214	14.9175	33.7256	4.87874	0
chr3_75263360_75263454_-	2	2	31	35	3	0	1	2	52	6	53	17	73	17	71	14	81	33	108	30	78	23	2	0	29	7	30.4414	9.3958	132.929	72.4452	72.5181	0	124.347	80.0032	151.254	31.4517	223.897	98.5936	184.545	62.5225	154.915	57.1713	166.174	91.7467	212.024	89.5049	219.216	112.211	14.3947
chr3_8990080_8990142_+	2	5	25	18	3	1	0	2	30	11	26	8	51	15	42	6	54	27	58	16	40	13	7	0	39	8	30.4414	23.4895	107.201	37.2575	72.5181	44.6449	0	80.0032	87.2621	57.6614	109.836	46.397	128.929	55.1669	91.6398	24.502	110.782	75.0655	113.865	47.736	112.419	63.4236	50.3815
chr3_156007277_156007324_+	2	3	8	1	0	1	0	3	12	6	5	6	11	11	12	5	8	6	13	10	15	5	0	0	2	3	30.4414	14.0937	34.3043	2.06986	0	44.6449	0	120.005	34.9048	31.4517	21.1224	34.7977	27.8082	40.4558	26.1828	20.4183	16.4122	16.6812	25.5214	29.835	42.157	24.3937	0
chrX_55909288_55909325_+	3	3	11	9	1	2	0	0	8	5	7	3	8	6	11	4	16	11	13	5	8	2	1	0	11	3	45.6621	14.0937	47.1684	18.6288	24.1727	89.2897	0	0	23.2699	26.2097	29.5713	17.3989	20.2241	22.0668	24.0009	16.3347	32.8244	30.5822	25.5214	14.9175	22.4837	9.75748	7.19735
chr6_3276856_3276909_+	4	1	3	3	0	0	0	2	1	3	6	4	7	7	7	9	3	16	11	12	3	7	0	0	2	7	60.8828	4.6979	12.8641	6.20959	0	0	0	80.0032	2.90874	15.7258	25.3468	23.1985	17.6961	25.7446	15.2733	36.753	6.15458	44.4832	21.595	35.802	8.4314	34.1512	0
chr10_56624104_56624107_-	2	2	13	12	1	0	0	3	9	18	10	18	35	24	13	17	23	24	44	39	23	19	0	0	8	9	30.4414	9.3958	55.7445	24.8383	24.1727	0	0	120.005	26.1786	94.355	42.2447	104.393	88.4806	88.2671	28.3647	69.4223	47.1851	66.7249	86.3802	116.356	64.6407	92.696	0
chr3_76321697_76321736_-	1	5	10	3	0	0	0	4	7	11	6	7	5	14	12	11	10	20	13	12	6	8	0	0	6	9	15.2207	23.4895	42.8804	6.20959	0	0	0	160.006	20.3611	57.6614	25.3468	40.5974	12.6401	51.4891	26.1828	44.9203	20.5153	55.6041	25.5214	35.802	16.8628	39.0299	0
chr17_21597448_21597526_+	1	2	10	4	0	1	0	1	17	2	8	2	19	3	13	1	13	10	32	7	10	4	2	0	11	2	15.2207	9.3958	42.8804	8.27945	0	44.6449	0	40.0016	49.4485	10.4839	33.7958	11.5992	48.0323	11.0334	28.3647	4.08367	26.6698	27.802	62.822	20.8845	28.1047	19.515	14.3947
chr2_26554997_26555010_-	0	0	0	0	8	5	0	3	35	17	22	17	54	29	28	21	56	45	76	45	33	31	0	0	15	2	0	0	0	0	193.382	223.224	0	120.005	101.806	89.113	92.9384	98.5936	136.513	106.656	61.0932	85.757	114.885	125.109	149.202	134.257	92.7453	151.241	0
chr9_36319544_36319619_+	2	4	13	5	0	0	0	3	5	12	5	9	15	17	9	8	13	15	10	11	7	9	1	3	14	8	30.4414	18.7916	55.7445	10.3493	0	0	0	120.005	14.5437	62.9033	21.1224	52.1966	37.9203	62.5225	19.6371	32.6693	26.6698	41.703	19.6319	32.8185	19.6733	43.9087	7.19735
chr5_165239113_165239115_+	7	16	28	24	10	10	0	8	47	21	31	22	47	28	48	33	48	27	57	41	43	24	0	0	26	12	106.545	75.1664	120.065	49.6767	241.727	446.449	0	320.013	136.711	110.081	130.959	127.592	118.817	102.978	104.731	134.761	98.4733	75.0655	111.902	122.323	120.85	117.09	0
chr8_112468825_112468879_-	1	0	7	2	1	0	0	3	7	1	4	2	11	3	5	2	8	3	14	6	5	4	0	0	1	1	15.2207	0	30.0163	4.13972	24.1727	0	0	120.005	20.3611	5.24194	16.8979	11.5992	27.8082	11.0334	10.9095	8.16733	16.4122	8.34061	27.4846	17.901	14.0523	19.515	0
chr4_25043609_25043705_+	1	0	6	2	0	0	0	1	4	3	3	3	4	9	6	6	8	9	11	9	7	6	0	0	2	2	15.2207	0	25.7282	4.13972	0	0	0	40.0016	11.6349	15.7258	12.6734	17.3989	10.1121	33.1002	13.0914	24.502	16.4122	25.0218	21.595	26.8515	19.6733	29.2724	0
chr9_10078399_10078488_-	5	9	30	39	2	1	3	1	33	12	33	15	42	13	62	15	53	25	61	33	39	20	2	0	50	12	76.1035	42.2811	128.641	80.7246	48.3454	44.6449	373.042	40.0016	95.9883	62.9033	139.408	86.9943	106.177	47.8113	135.278	61.255	108.731	69.5051	119.754	98.4554	109.608	97.5748	14.3947
chr10_46051015_46051018_+	1	2	4	2	0	0	0	0	2	6	2	2	5	4	4	3	7	8	9	3	2	2	1	0	11	6	15.2207	9.3958	17.1521	4.13972	0	0	0	0	5.81747	31.4517	8.44894	11.5992	12.6401	14.7112	8.7276	12.251	14.3607	22.2416	17.6687	8.95049	5.62093	9.75748	7.19735
chr6_41569872_41569873_+	1	0	4	1	1	0	0	0	3	2	3	2	10	4	10	4	9	3	4	3	3	2	1	0	7	1	15.2207	0	17.1521	2.06986	24.1727	0	0	0	8.72621	10.4839	12.6734	11.5992	25.2802	14.7112	21.819	16.3347	18.4637	8.34061	7.85275	8.95049	8.4314	9.75748	7.19735
chr14_84470587_84470631_-	0	0	4	1	0	0	0	0	3	1	2	0	3	0	2	1	3	2	2	1	4	2	0	0	6	1	0	0	17.1521	2.06986	0	0	0	0	8.72621	5.24194	8.44894	0	7.58405	0	4.3638	4.08367	6.15458	5.56041	3.92637	2.9835	11.2419	9.75748	0
chr2_105353682_105353736_-	4	0	9	13	1	1	0	0	5	4	8	5	12	9	11	13	17	5	23	25	11	5	0	0	9	5	60.8828	0	38.5923	26.9082	24.1727	44.6449	0	0	14.5437	20.9678	33.7958	28.9981	30.3362	33.1002	24.0009	53.0877	34.8759	13.901	45.1533	74.5875	30.9151	24.3937	0
chr3_63493875_63493965_+	0	0	17	10	1	0	0	0	11	2	16	5	23	0	35	3	32	7	39	7	22	7	3	0	14	3	0	0	72.8966	20.6986	24.1727	0	0	0	31.9961	10.4839	67.5915	28.9981	58.1444	0	76.3665	12.251	65.6488	19.4614	76.5643	20.8845	61.8302	34.1512	21.5921
chr3_48364137_48364194_-	15	22	64	33	3	3	1	6	60	44	43	35	66	71	86	59	80	73	103	91	73	58	16	2	46	23	228.311	103.354	274.434	68.3054	72.5181	133.935	124.347	240.01	174.524	230.645	181.652	202.987	166.849	261.123	187.643	240.936	164.122	202.955	202.208	271.498	205.164	282.967	115.158
chr3_56144583_56144585_-	3	4	8	8	0	0	0	3	11	12	7	6	10	19	5	1	6	10	12	5	5	3	2	1	20	9	45.6621	18.7916	34.3043	16.5589	0	0	0	120.005	31.9961	62.9033	29.5713	34.7977	25.2802	69.8781	10.9095	4.08367	12.3092	27.802	23.5582	14.9175	14.0523	14.6362	14.3947
chr1_64145981_64145983_-	6	1	3	3	0	0	0	0	3	6	7	5	4	7	1	7	5	7	5	0	2	4	1	1	6	5	91.3242	4.6979	12.8641	6.20959	0	0	0	0	8.72621	31.4517	29.5713	28.9981	10.1121	25.7446	2.1819	28.5857	10.2576	19.4614	9.81593	0	5.62093	19.515	7.19735
chr10_15330858_15330859_-	4	1	8	10	0	0	1	0	3	3	5	1	6	4	4	3	4	5	9	5	7	2	1	0	10	5	60.8828	4.6979	34.3043	20.6986	0	0	124.347	0	8.72621	15.7258	21.1224	5.79962	15.1681	14.7112	8.7276	12.251	8.2061	13.901	17.6687	14.9175	19.6733	9.75748	7.19735
chr10_83068714_83068715_-	3	0	0	0	0	0	0	0	1	6	1	10	1	7	2	7	1	6	0	14	0	8	0	0	1	5	45.6621	0	0	0	0	0	0	0	2.90874	31.4517	4.22447	57.9962	2.52802	25.7446	4.3638	28.5857	2.05153	16.6812	0	41.769	0	39.0299	0
chr10_53051585_53051683_-	6	3	5	3	0	0	0	1	1	12	1	7	5	19	3	7	4	17	6	27	1	15	1	1	1	14	91.3242	14.0937	21.4402	6.20959	0	0	0	40.0016	2.90874	62.9033	4.22447	40.5974	12.6401	69.8781	6.5457	28.5857	8.2061	47.2634	11.7791	80.5545	2.81047	73.1811	7.19735
chr3_155508552_155508554_+	2	3	13	11	0	0	0	0	13	4	17	5	15	6	26	3	18	8	30	16	21	1	0	0	10	5	30.4414	14.0937	55.7445	22.7685	0	0	0	0	37.8136	20.9678	71.816	28.9981	37.9203	22.0668	56.7294	12.251	36.9275	22.2416	58.8956	47.736	59.0198	4.87874	0
chr4_37879573_37879574_-	4	1	1	1	0	0	0	0	0	3	0	0	0	3	0	3	1	7	2	11	0	8	0	1	4	6	60.8828	4.6979	4.28804	2.06986	0	0	0	0	0	15.7258	0	0	0	11.0334	0	12.251	2.05153	19.4614	3.92637	32.8185	0	39.0299	0
chr10_72793177_72793191_-	1	6	34	14	1	0	0	0	39	19	10	16	39	26	21	11	40	29	66	32	51	21	2	1	26	5	15.2207	28.1874	145.793	28.9781	24.1727	0	0	0	113.441	99.5969	42.2447	92.794	98.5927	95.6227	45.8199	44.9203	82.061	80.6259	129.57	95.4719	143.334	102.454	14.3947
chr10_64607472_64607504_-	0	1	6	3	2	0	0	0	3	4	9	0	7	5	9	5	8	7	11	6	11	6	0	0	8	4	0	4.6979	25.7282	6.20959	48.3454	0	0	0	8.72621	20.9678	38.0202	0	17.6961	18.389	19.6371	20.4183	16.4122	19.4614	21.595	17.901	30.9151	29.2724	0
chr1_158884553_158884586_+	0	0	4	0	0	1	0	0	4	6	5	1	5	4	1	1	4	6	9	1	9	2	0	0	4	1	0	0	17.1521	0	0	44.6449	0	0	11.6349	31.4517	21.1224	5.79962	12.6401	14.7112	2.1819	4.08367	8.2061	16.6812	17.6687	2.9835	25.2942	9.75748	0
chr4_160658750_160658827_-	94	133	31	33	12	12	0	16	40	299	27	276	52	450	35	274	27	452	65	511	24	347	4	1	33	200	1430.75	624.821	132.929	68.3054	290.072	535.738	0	640.026	116.349	1567.34	114.061	1600.7	131.457	1655.01	76.3665	1118.92	55.3912	1256.65	127.607	1524.57	67.4512	1692.92	28.7894
chr1_265330622_265330697_-	1	1	2	1	0	0	0	2	11	2	2	1	7	6	11	1	8	4	14	1	7	4	0	0	12	2	15.2207	4.6979	8.57607	2.06986	0	0	0	80.0032	31.9961	10.4839	8.44894	5.79962	17.6961	22.0668	24.0009	4.08367	16.4122	11.1208	27.4846	2.9835	19.6733	19.515	0
chr1_149207683_149207731_+	3	3	25	15	0	1	0	0	26	8	33	4	30	6	23	5	34	6	38	9	27	12	7	2	26	7	45.6621	14.0937	107.201	31.0479	0	44.6449	0	0	75.6271	41.9355	139.408	23.1985	75.8405	22.0668	50.1837	20.4183	69.7519	16.6812	74.6011	26.8515	75.8826	58.5449	50.3815
chr10_67725375_67725431_+	6	6	17	13	2	1	1	4	20	15	10	17	30	22	18	14	28	38	29	21	18	20	3	3	19	8	91.3242	28.1874	72.8966	26.9082	48.3454	44.6449	124.347	160.006	58.1747	78.6291	42.2447	98.5936	75.8405	80.9115	39.2742	57.1713	57.4427	105.648	56.9324	62.6535	50.5884	97.5748	21.5921
chr1_137553963_137553965_-	1	0	4	0	0	0	0	1	1	1	1	2	6	2	5	3	4	2	3	6	4	2	0	0	3	0	15.2207	0	17.1521	0	0	0	0	40.0016	2.90874	5.24194	4.22447	11.5992	15.1681	7.35559	10.9095	12.251	8.2061	5.56041	5.88956	17.901	11.2419	9.75748	0
chr5_22048498_22048499_-	3	3	10	8	2	1	0	1	10	7	8	5	17	7	12	7	22	9	17	10	9	6	0	1	8	6	45.6621	14.0937	42.8804	16.5589	48.3454	44.6449	0	40.0016	29.0874	36.6936	33.7958	28.9981	42.9763	25.7446	26.1828	28.5857	45.1336	25.0218	33.3742	29.835	25.2942	29.2724	0
chr9_47194563_47194624_+	4	2	21	13	6	0	1	0	50	8	44	10	58	14	76	13	70	12	80	24	46	12	4	0	10	3	60.8828	9.3958	90.0488	26.9082	145.036	0	124.347	0	145.437	41.9355	185.877	57.9962	146.625	51.4891	165.824	53.0877	143.607	33.3624	157.055	71.604	129.281	58.5449	28.7894
chr3_158248056_158248063_-	4	2	6	0	6	0	0	0	2	1	0	4	0	0	3	4	1	8	1	0	0	1	0	0	0	1	60.8828	9.3958	25.7282	0	145.036	0	0	0	5.81747	5.24194	0	23.1985	0	0	6.5457	16.3347	2.05153	22.2416	1.96319	0	0	4.87874	0
chr18_32069613_32069685_+	2	1	5	5	0	0	0	0	16	3	4	6	18	8	14	7	8	7	17	9	14	4	4	0	17	9	30.4414	4.6979	21.4402	10.3493	0	0	0	0	46.5398	15.7258	16.8979	34.7977	45.5043	29.4224	30.5466	28.5857	16.4122	19.4614	33.3742	26.8515	39.3465	19.515	28.7894
chr1_65501666_65501670_+	18	37	88	98	38	5	12	10	194	54	164	39	192	68	235	67	252	72	226	79	219	61	4	2	107	35	273.973	173.822	377.347	202.846	918.562	223.224	1492.17	400.016	564.295	283.065	692.813	226.185	485.379	250.09	512.747	273.606	516.985	200.175	443.68	235.696	615.492	297.603	28.7894
chr12_11178159_11178219_-	1	1	7	3	4	1	0	0	16	4	6	5	15	10	10	9	14	14	12	11	12	6	1	0	9	1	15.2207	4.6979	30.0163	6.20959	96.6908	44.6449	0	0	46.5398	20.9678	25.3468	28.9981	37.9203	36.778	21.819	36.753	28.7214	38.9228	23.5582	32.8185	33.7256	29.2724	7.19735
chr19_41658830_41658831_-	1	0	4	1	0	0	0	0	0	1	1	0	2	0	2	0	0	1	3	1	2	0	0	0	2	2	15.2207	0	17.1521	2.06986	0	0	0	0	0	5.24194	4.22447	0	5.05603	0	4.3638	0	0	2.7802	5.88956	2.9835	5.62093	0	0
chr1_207727416_207727489_-	2	7	30	21	7	0	1	3	64	19	49	14	87	24	116	22	124	32	126	18	80	14	1	0	39	6	30.4414	32.8853	128.641	43.4671	169.209	0	124.347	120.005	186.159	99.5969	206.999	81.1947	219.937	88.2671	253.1	89.8407	254.389	88.9665	247.361	53.703	224.837	68.3023	7.19735
chrX_122139081_122139083_+	4	5	6	4	6	3	1	3	25	10	14	5	22	10	37	8	35	13	37	11	20	11	0	0	13	4	60.8828	23.4895	25.7282	8.27945	145.036	133.935	124.347	120.005	72.7184	52.4194	59.1426	28.9981	55.6164	36.778	80.7303	32.6693	71.8034	36.1426	72.6379	32.8185	56.2093	53.6661	0
chr14_80574088_80574181_-	1	1	3	2	0	0	0	0	2	1	5	1	6	1	5	2	1	2	4	12	5	4	0	1	11	5	15.2207	4.6979	12.8641	4.13972	0	0	0	0	5.81747	5.24194	21.1224	5.79962	15.1681	3.6778	10.9095	8.16733	2.05153	5.56041	7.85275	35.802	14.0523	19.515	0
chr8_74556748_74556827_-	4	7	14	4	2	2	0	1	11	15	12	10	28	20	13	10	8	14	29	16	12	12	1	1	8	5	60.8828	32.8853	60.0325	8.27945	48.3454	89.2897	0	40.0016	31.9961	78.6291	50.6937	57.9962	70.7845	73.5559	28.3647	40.8367	16.4122	38.9228	56.9324	47.736	33.7256	58.5449	7.19735
chr3_43979103_43979104_+	2	1	3	1	0	1	0	0	13	6	4	5	10	2	10	3	17	6	15	7	14	4	0	0	8	1	30.4414	4.6979	12.8641	2.06986	0	44.6449	0	0	37.8136	31.4517	16.8979	28.9981	25.2802	7.35559	21.819	12.251	34.8759	16.6812	29.4478	20.8845	39.3465	19.515	0
chr10_10918102_10918186_-	6	7	14	12	0	0	0	0	8	3	4	7	19	4	15	5	14	8	15	4	12	4	2	0	16	6	91.3242	32.8853	60.0325	24.8383	0	0	0	0	23.2699	15.7258	16.8979	40.5974	48.0323	14.7112	32.7285	20.4183	28.7214	22.2416	29.4478	11.934	33.7256	19.515	14.3947
chr1_149272566_149272632_+	10	5	28	35	1	2	0	2	41	16	35	13	44	14	33	9	54	26	56	15	35	22	6	1	41	4	152.207	23.4895	120.065	72.4452	24.1727	89.2897	0	80.0032	119.258	83.8711	147.857	75.3951	111.233	51.4891	72.0027	36.753	110.782	72.2853	109.938	44.7525	98.3663	107.332	43.1841
chr10_40405791_40405821_-	1	2	6	3	0	0	0	0	5	3	4	4	8	7	6	8	10	10	14	7	10	4	0	0	8	3	15.2207	9.3958	25.7282	6.20959	0	0	0	0	14.5437	15.7258	16.8979	23.1985	20.2241	25.7446	13.0914	32.6693	20.5153	27.802	27.4846	20.8845	28.1047	19.515	0
chr3_89731345_89731445_-	1	0	3	0	0	0	0	0	2	5	3	1	5	5	5	7	3	5	1	3	2	2	0	0	1	2	15.2207	0	12.8641	0	0	0	0	0	5.81747	26.2097	12.6734	5.79962	12.6401	18.389	10.9095	28.5857	6.15458	13.901	1.96319	8.95049	5.62093	9.75748	0
chr1_212740832_212740834_-	1	1	3	0	0	0	0	1	0	1	0	2	0	1	0	3	0	1	1	5	0	3	0	0	1	6	15.2207	4.6979	12.8641	0	0	0	0	40.0016	0	5.24194	0	11.5992	0	3.6778	0	12.251	0	2.7802	1.96319	14.9175	0	14.6362	0
chr9_105503298_105503329_-	2	0	7	5	0	1	0	1	6	2	6	4	10	5	5	5	14	5	12	12	6	2	1	0	7	2	30.4414	0	30.0163	10.3493	0	44.6449	0	40.0016	17.4524	10.4839	25.3468	23.1985	25.2802	18.389	10.9095	20.4183	28.7214	13.901	23.5582	35.802	16.8628	9.75748	7.19735
chr19_53742642_53742652_+	3	14	49	26	7	1	1	0	107	27	82	22	134	33	165	39	156	37	153	38	125	35	5	0	57	12	45.6621	65.7706	210.114	53.8164	169.209	44.6449	124.347	0	311.235	141.532	346.407	127.592	338.754	121.367	360.014	159.263	320.038	102.868	300.368	113.373	351.308	170.756	35.9868
chr1_204377930_204377937_+	2	0	3	1	0	0	0	0	5	1	0	2	4	2	2	3	6	3	8	5	3	7	0	0	1	3	30.4414	0	12.8641	2.06986	0	0	0	0	14.5437	5.24194	0	11.5992	10.1121	7.35559	4.3638	12.251	12.3092	8.34061	15.7055	14.9175	8.4314	34.1512	0
chr10_95461966_95462014_+	1	0	9	3	3	0	0	1	6	0	6	0	7	2	16	0	16	2	15	0	11	1	0	0	3	0	15.2207	0	38.5923	6.20959	72.5181	0	0	40.0016	17.4524	0	25.3468	0	17.6961	7.35559	34.9104	0	32.8244	5.56041	29.4478	0	30.9151	4.87874	0
chr17_96259399_96259486_+	4	8	35	17	11	2	1	2	67	14	50	11	68	19	95	22	92	19	100	23	85	14	3	0	31	3	60.8828	37.5832	150.081	35.1877	265.9	89.2897	124.347	80.0032	194.885	73.3872	211.224	63.7959	171.905	69.8781	207.281	89.8407	188.74	52.8239	196.319	68.6205	238.89	68.3023	21.5921
chr11_63912366_63912461_+	0	1	5	2	0	0	0	1	7	4	4	3	4	3	5	3	10	3	7	7	4	1	1	0	11	3	0	4.6979	21.4402	4.13972	0	0	0	40.0016	20.3611	20.9678	16.8979	17.3989	10.1121	11.0334	10.9095	12.251	20.5153	8.34061	13.7423	20.8845	11.2419	4.87874	7.19735
chr6_6861616_6861650_-	8	12	113	57	14	1	0	1	152	23	124	13	159	27	219	30	209	47	217	34	147	22	20	1	76	11	121.766	56.3748	484.548	117.982	338.418	44.6449	0	40.0016	442.128	120.565	523.834	75.3951	401.955	99.3005	477.836	122.51	428.769	130.67	426.011	101.439	413.138	107.332	143.947
chr15_103917051_103917142_+	7	3	2	0	0	0	0	0	3	8	5	12	1	18	3	5	2	12	0	9	1	4	2	1	2	11	106.545	14.0937	8.57607	0	0	0	0	0	8.72621	41.9355	21.1224	69.5955	2.52802	66.2003	6.5457	20.4183	4.10305	33.3624	0	26.8515	2.81047	19.515	14.3947
chr13_95349840_95349886_+	6	15	20	16	4	3	1	2	43	13	35	20	57	35	72	32	80	42	83	61	80	22	0	0	32	13	91.3242	70.4685	85.7607	33.1178	96.6908	133.935	124.347	80.0032	125.076	68.1452	147.857	115.992	144.097	128.723	157.097	130.677	164.122	116.769	162.944	181.993	224.837	107.332	0
chr10_63725895_63725990_+	31	79	167	168	18	9	2	2	162	49	115	31	177	64	259	65	226	97	204	66	177	44	2	0	121	46	471.842	371.134	716.102	347.737	435.108	401.804	248.694	80.0032	471.215	256.855	485.814	179.788	447.459	235.379	565.112	265.438	463.645	269.68	400.49	196.911	497.452	214.665	14.3947
chr13_73650668_73650712_+	4	8	8	4	4	1	0	1	6	6	12	9	13	18	23	20	15	25	11	23	12	27	0	0	14	7	60.8828	37.5832	34.3043	8.27945	96.6908	44.6449	0	40.0016	17.4524	31.4517	50.6937	52.1966	32.8642	66.2003	50.1837	81.6733	30.7729	69.5051	21.595	68.6205	33.7256	131.726	0
chr17_89075905_89075998_+	0	0	6	1	0	0	0	0	5	3	5	0	6	1	9	2	3	3	6	4	4	1	0	0	3	1	0	0	25.7282	2.06986	0	0	0	0	14.5437	15.7258	21.1224	0	15.1681	3.6778	19.6371	8.16733	6.15458	8.34061	11.7791	11.934	11.2419	4.87874	0
chr4_143862702_143862704_+	12	15	31	33	3	0	0	4	21	16	15	15	30	26	26	19	23	21	45	30	34	25	5	5	42	19	182.648	70.4685	132.929	68.3054	72.5181	0	0	160.006	61.0834	83.8711	63.3671	86.9943	75.8405	95.6227	56.7294	77.5897	47.1851	58.3843	88.3434	89.5049	95.5558	121.968	35.9868
chr10_16514336_16514405_+	4	2	4	0	2	0	0	0	4	16	6	20	8	12	7	19	4	16	14	36	9	15	0	0	0	3	60.8828	9.3958	17.1521	0	48.3454	0	0	0	11.6349	83.8711	25.3468	115.992	20.2241	44.1335	15.2733	77.5897	8.2061	44.4832	27.4846	107.406	25.2942	73.1811	0
chr10_83045861_83045876_-	3	0	1	2	0	1	0	0	3	11	7	13	3	15	5	16	4	20	2	20	3	11	0	0	5	5	45.6621	0	4.28804	4.13972	0	44.6449	0	0	8.72621	57.6614	29.5713	75.3951	7.58405	55.1669	10.9095	65.3387	8.2061	55.6041	3.92637	59.67	8.4314	53.6661	0
chr1_95074436_95074437_+	4	2	2	1	0	0	0	0	0	1	2	1	0	2	2	4	0	7	0	6	0	2	1	0	2	9	60.8828	9.3958	8.57607	2.06986	0	0	0	0	0	5.24194	8.44894	5.79962	0	7.35559	4.3638	16.3347	0	19.4614	0	17.901	0	9.75748	7.19735
chr4_182663243_182663244_-	0	1	7	4	0	0	1	0	8	3	4	2	5	1	9	4	4	8	8	6	7	1	1	0	10	6	0	4.6979	30.0163	8.27945	0	0	124.347	0	23.2699	15.7258	16.8979	11.5992	12.6401	3.6778	19.6371	16.3347	8.2061	22.2416	15.7055	17.901	19.6733	4.87874	7.19735
chr2_94886845_94886888_+	4	4	17	20	6	6	1	2	30	8	19	8	38	8	45	10	46	9	43	17	33	11	0	0	21	4	60.8828	18.7916	72.8966	41.3972	145.036	267.869	124.347	80.0032	87.2621	41.9355	80.265	46.397	96.0646	29.4224	98.1855	40.8367	94.3702	25.0218	84.417	50.7195	92.7453	53.6661	0
chrX_34292543_34292561_-	3	2	15	15	4	0	1	2	28	10	21	17	43	11	33	6	38	16	25	15	34	10	3	0	25	3	45.6621	9.3958	64.3205	31.0479	96.6908	0	124.347	80.0032	81.4446	52.4194	88.7139	98.5936	108.705	40.4558	72.0027	24.502	77.958	44.4832	49.0797	44.7525	95.5558	48.7874	21.5921
chr13_87137503_87137505_-	2	3	5	3	4	1	0	1	12	8	11	3	12	6	20	8	18	8	21	10	16	8	0	0	8	5	30.4414	14.0937	21.4402	6.20959	96.6908	44.6449	0	40.0016	34.9048	41.9355	46.4692	17.3989	30.3362	22.0668	43.638	32.6693	36.9275	22.2416	41.2269	29.835	44.9674	39.0299	0
chrX_56624429_56624481_-	0	0	14	5	1	0	0	0	14	1	9	2	11	4	7	0	11	1	19	0	12	2	1	1	10	0	0	0	60.0325	10.3493	24.1727	0	0	0	40.7223	5.24194	38.0202	11.5992	27.8082	14.7112	15.2733	0	22.5668	2.7802	37.3005	0	33.7256	9.75748	7.19735
chr7_57162174_57162243_-	0	0	0	0	1	0	0	0	10	6	9	7	9	2	13	5	14	5	23	9	10	10	0	0	12	4	0	0	0	0	24.1727	0	0	0	29.0874	31.4517	38.0202	40.5974	22.7522	7.35559	28.3647	20.4183	28.7214	13.901	45.1533	26.8515	28.1047	48.7874	0
chr1_207357044_207357045_+	1	2	7	3	1	0	1	1	5	7	5	12	11	6	5	6	5	8	9	14	10	8	1	0	7	5	15.2207	9.3958	30.0163	6.20959	24.1727	0	124.347	40.0016	14.5437	36.6936	21.1224	69.5955	27.8082	22.0668	10.9095	24.502	10.2576	22.2416	17.6687	41.769	28.1047	39.0299	7.19735
chr19_25191755_25191758_-	4	2	5	6	0	0	0	0	1	4	3	2	4	6	3	4	4	8	5	13	4	1	0	1	9	6	60.8828	9.3958	21.4402	12.4192	0	0	0	0	2.90874	20.9678	12.6734	11.5992	10.1121	22.0668	6.5457	16.3347	8.2061	22.2416	9.81593	38.7855	11.2419	4.87874	0
chr4_143705437_143705439_+	2	1	9	6	1	0	0	6	18	10	6	8	15	15	14	13	13	16	26	14	18	13	1	0	14	0	30.4414	4.6979	38.5923	12.4192	24.1727	0	0	240.01	52.3572	52.4194	25.3468	46.397	37.9203	55.1669	30.5466	53.0877	26.6698	44.4832	51.0428	41.769	50.5884	63.4236	7.19735
chr5_73256704_73256715_+	0	0	0	0	4	0	0	0	8	9	6	5	6	6	7	7	9	8	8	13	7	8	0	0	12	4	0	0	0	0	96.6908	0	0	0	23.2699	47.1775	25.3468	28.9981	15.1681	22.0668	15.2733	28.5857	18.4637	22.2416	15.7055	38.7855	19.6733	39.0299	0
chr6_110047538_110047609_+	3	1	11	13	2	0	0	2	17	11	19	12	15	18	10	11	15	14	16	18	14	9	0	2	19	8	45.6621	4.6979	47.1684	26.9082	48.3454	0	0	80.0032	49.4485	57.6614	80.265	69.5955	37.9203	66.2003	21.819	44.9203	30.7729	38.9228	31.411	53.703	39.3465	43.9087	0
chr3_170449592_170449658_-	2	4	12	7	1	1	0	0	23	7	20	5	21	13	13	3	24	10	16	9	14	8	0	0	16	2	30.4414	18.7916	51.4564	14.489	24.1727	44.6449	0	0	66.9009	36.6936	84.4894	28.9981	53.0884	47.8113	28.3647	12.251	49.2366	27.802	31.411	26.8515	39.3465	39.0299	0
chr19_37084061_37084109_-	0	0	3	1	0	0	0	0	8	2	0	0	12	6	6	1	5	5	9	2	4	1	0	0	6	2	0	0	12.8641	2.06986	0	0	0	0	23.2699	10.4839	0	0	30.3362	22.0668	13.0914	4.08367	10.2576	13.901	17.6687	5.967	11.2419	4.87874	0
chr19_25271082_25271084_-	3	2	5	4	1	0	0	0	0	2	2	1	4	10	1	4	5	5	5	8	3	7	0	0	5	4	45.6621	9.3958	21.4402	8.27945	24.1727	0	0	0	0	10.4839	8.44894	5.79962	10.1121	36.778	2.1819	16.3347	10.2576	13.901	9.81593	23.868	8.4314	34.1512	0
chr7_2184160_2184162_-	6	5	3	3	0	0	0	0	2	6	3	6	0	15	2	6	3	17	6	9	5	9	0	0	4	8	91.3242	23.4895	12.8641	6.20959	0	0	0	0	5.81747	31.4517	12.6734	34.7977	0	55.1669	4.3638	24.502	6.15458	47.2634	11.7791	26.8515	14.0523	43.9087	0
chr12_36301785_36301870_+	0	1	14	10	0	0	0	1	25	7	26	3	42	3	45	11	64	5	69	8	54	8	0	0	12	2	0	4.6979	60.0325	20.6986	0	0	0	40.0016	72.7184	36.6936	109.836	17.3989	106.177	11.0334	98.1855	44.9203	131.298	13.901	135.46	23.868	151.765	39.0299	0
chr12_35267170_35267171_+	4	3	6	2	1	0	0	0	7	8	4	12	7	11	5	10	6	14	4	11	3	10	0	1	3	3	60.8828	14.0937	25.7282	4.13972	24.1727	0	0	0	20.3611	41.9355	16.8979	69.5955	17.6961	40.4558	10.9095	40.8367	12.3092	38.9228	7.85275	32.8185	8.4314	48.7874	0
chr14_83449353_83449355_-	1	3	24	12	3	0	0	0	25	7	13	6	31	12	31	6	39	9	42	10	25	6	5	1	17	9	15.2207	14.0937	102.913	24.8383	72.5181	0	0	0	72.7184	36.6936	54.9181	34.7977	78.3685	44.1335	67.6389	24.502	80.0095	25.0218	82.4538	29.835	70.2616	29.2724	35.9868
chr10_64309805_64309806_-	1	1	4	0	0	0	0	0	7	5	4	3	13	6	11	8	7	7	8	4	6	2	0	0	2	2	15.2207	4.6979	17.1521	0	0	0	0	0	20.3611	26.2097	16.8979	17.3989	32.8642	22.0668	24.0009	32.6693	14.3607	19.4614	15.7055	11.934	16.8628	9.75748	0
chr2_123183857_123183926_-	1	1	9	4	0	1	0	1	5	4	6	4	5	4	2	9	6	9	13	16	3	2	0	0	3	1	15.2207	4.6979	38.5923	8.27945	0	44.6449	0	40.0016	14.5437	20.9678	25.3468	23.1985	12.6401	14.7112	4.3638	36.753	12.3092	25.0218	25.5214	47.736	8.4314	9.75748	0
chr5_63259329_63259330_-	4	0	1	1	0	0	0	0	0	4	1	2	3	3	0	2	2	6	3	1	0	3	0	0	1	3	60.8828	0	4.28804	2.06986	0	0	0	0	0	20.9678	4.22447	11.5992	7.58405	11.0334	0	8.16733	4.10305	16.6812	5.88956	2.9835	0	14.6362	0
chr10_40326389_40326487_-	4	4	13	5	1	0	0	2	12	5	12	6	7	16	9	4	5	11	7	9	6	9	2	0	4	3	60.8828	18.7916	55.7445	10.3493	24.1727	0	0	80.0032	34.9048	26.2097	50.6937	34.7977	17.6961	58.8447	19.6371	16.3347	10.2576	30.5822	13.7423	26.8515	16.8628	43.9087	14.3947
chr1_8012014_8012040_-	1	0	2	1	0	0	0	0	5	1	5	0	9	1	6	2	6	1	2	0	5	1	0	0	7	1	15.2207	0	8.57607	2.06986	0	0	0	0	14.5437	5.24194	21.1224	0	22.7522	3.6778	13.0914	8.16733	12.3092	2.7802	3.92637	0	14.0523	4.87874	0
chr1_122479293_122479294_-	1	1	5	1	0	0	1	0	3	5	2	2	6	8	4	2	3	8	4	13	3	3	0	0	2	3	15.2207	4.6979	21.4402	2.06986	0	0	124.347	0	8.72621	26.2097	8.44894	11.5992	15.1681	29.4224	8.7276	8.16733	6.15458	22.2416	7.85275	38.7855	8.4314	14.6362	0
chr3_59892082_59892170_-	4	10	30	25	1	0	0	1	43	15	23	21	45	41	37	28	45	27	82	62	59	28	8	3	44	25	60.8828	46.979	128.641	51.7465	24.1727	0	0	40.0016	125.076	78.6291	97.1628	121.792	113.761	150.79	80.7303	114.343	92.3187	75.0655	160.981	184.977	165.817	136.605	57.5788
chr9_83716857_83716859_-	10	8	4	2	1	3	0	1	3	12	4	14	7	17	5	15	3	17	5	23	3	13	1	1	2	10	152.207	37.5832	17.1521	4.13972	24.1727	133.935	0	40.0016	8.72621	62.9033	16.8979	81.1947	17.6961	62.5225	10.9095	61.255	6.15458	47.2634	9.81593	68.6205	8.4314	63.4236	7.19735
chr17_26725382_26725481_-	0	0	1	0	0	0	0	0	2	1	1	1	4	1	16	3	20	2	2	1	3	1	0	0	11	1	0	0	4.28804	0	0	0	0	0	5.81747	5.24194	4.22447	5.79962	10.1121	3.6778	34.9104	12.251	41.0305	5.56041	3.92637	2.9835	8.4314	4.87874	0
chr12_21884842_21884848_+	9	11	25	25	2	0	0	3	17	21	12	9	18	23	13	16	22	24	20	21	21	21	6	0	23	15	136.986	51.6769	107.201	51.7465	48.3454	0	0	120.005	49.4485	110.081	50.6937	52.1966	45.5043	84.5893	28.3647	65.3387	45.1336	66.7249	39.2637	62.6535	59.0198	102.454	43.1841
chr10_35344745_35344798_+	0	1	3	0	1	0	0	0	5	0	2	4	6	1	12	2	4	3	8	1	3	2	0	0	5	4	0	4.6979	12.8641	0	24.1727	0	0	0	14.5437	0	8.44894	23.1985	15.1681	3.6778	26.1828	8.16733	8.2061	8.34061	15.7055	2.9835	8.4314	9.75748	0
chr2_83282011_83282110_+	0	0	1	1	0	0	0	1	4	0	1	0	0	0	25	14	20	20	2	3	0	2	0	0	8	6	0	0	4.28804	2.06986	0	0	0	40.0016	11.6349	0	4.22447	0	0	0	54.5475	57.1713	41.0305	55.6041	3.92637	8.95049	0	9.75748	0
chr19_26573530_26573535_-	4	5	11	3	1	1	0	1	9	2	2	5	8	7	5	5	4	7	13	13	8	6	3	1	7	8	60.8828	23.4895	47.1684	6.20959	24.1727	44.6449	0	40.0016	26.1786	10.4839	8.44894	28.9981	20.2241	25.7446	10.9095	20.4183	8.2061	19.4614	25.5214	38.7855	22.4837	29.2724	21.5921
chr4_143870661_143870662_+	10	11	8	4	1	1	0	2	15	25	6	18	16	37	9	18	15	38	20	32	12	20	3	3	11	17	152.207	51.6769	34.3043	8.27945	24.1727	44.6449	0	80.0032	43.631	131.049	25.3468	104.393	40.4483	136.078	19.6371	73.506	30.7729	105.648	39.2637	95.4719	33.7256	97.5748	21.5921
chr1_233053587_233053624_+	3	0	2	1	0	0	0	1	2	22	3	10	7	22	2	16	3	24	2	26	1	15	2	0	4	8	45.6621	0	8.57607	2.06986	0	0	0	40.0016	5.81747	115.323	12.6734	57.9962	17.6961	80.9115	4.3638	65.3387	6.15458	66.7249	3.92637	77.571	2.81047	73.1811	14.3947
chr19_25377215_25377292_-	3	4	8	2	0	1	0	0	1	6	1	5	7	7	6	12	3	14	6	15	1	15	0	0	4	2	45.6621	18.7916	34.3043	4.13972	0	44.6449	0	0	2.90874	31.4517	4.22447	28.9981	17.6961	25.7446	13.0914	49.004	6.15458	38.9228	11.7791	44.7525	2.81047	73.1811	0
chr1_212739503_212739589_-	3	0	2	0	0	0	0	0	1	4	3	5	3	6	1	4	1	13	1	7	2	6	0	2	2	7	45.6621	0	8.57607	0	0	0	0	0	2.90874	20.9678	12.6734	28.9981	7.58405	22.0668	2.1819	16.3347	2.05153	36.1426	1.96319	20.8845	5.62093	29.2724	0
chr8_111573430_111573485_+	5	5	23	20	6	2	1	0	41	4	14	6	29	6	45	2	42	10	45	5	18	2	6	0	25	6	76.1035	23.4895	98.6248	41.3972	145.036	89.2897	124.347	0	119.258	20.9678	59.1426	34.7977	73.3125	22.0668	98.1855	8.16733	86.1641	27.802	88.3434	14.9175	50.5884	9.75748	43.1841
chr8_32018003_32018077_+	3	3	8	3	0	1	0	0	2	1	4	1	8	3	4	2	11	5	7	5	6	3	1	0	7	2	45.6621	14.0937	34.3043	6.20959	0	44.6449	0	0	5.81747	5.24194	16.8979	5.79962	20.2241	11.0334	8.7276	8.16733	22.5668	13.901	13.7423	14.9175	16.8628	14.6362	7.19735
chr1_204836382_204836481_+	2	1	2	3	0	0	0	1	5	6	5	4	8	12	8	7	1	26	12	22	2	12	0	0	9	6	30.4414	4.6979	8.57607	6.20959	0	0	0	40.0016	14.5437	31.4517	21.1224	23.1985	20.2241	44.1335	17.4552	28.5857	2.05153	72.2853	23.5582	65.637	5.62093	58.5449	0
chr6_110014006_110014074_+	3	2	5	2	3	1	0	5	26	6	15	6	30	11	26	6	44	17	32	9	28	8	1	0	6	2	45.6621	9.3958	21.4402	4.13972	72.5181	44.6449	0	200.008	75.6271	31.4517	63.3671	34.7977	75.8405	40.4558	56.7294	24.502	90.2671	47.2634	62.822	26.8515	78.693	39.0299	7.19735
chr10_59866414_59866421_+	4	3	1	0	0	0	0	0	1	5	0	11	2	6	2	9	1	18	5	12	0	9	0	0	1	9	60.8828	14.0937	4.28804	0	0	0	0	0	2.90874	26.2097	0	63.7959	5.05603	22.0668	4.3638	36.753	2.05153	50.0436	9.81593	35.802	0	43.9087	0
chr1_204854459_204854460_+	5	1	7	15	0	0	0	0	9	2	4	0	10	1	8	0	7	4	19	2	11	1	0	0	16	6	76.1035	4.6979	30.0163	31.0479	0	0	0	0	26.1786	10.4839	16.8979	0	25.2802	3.6778	17.4552	0	14.3607	11.1208	37.3005	5.967	30.9151	4.87874	0
chr3_3389497_3389502_-	3	3	13	14	6	1	2	0	38	8	45	11	45	10	51	17	51	17	47	16	35	7	3	0	30	4	45.6621	14.0937	55.7445	28.9781	145.036	44.6449	248.694	0	110.532	41.9355	190.101	63.7959	113.761	36.778	111.277	69.4223	104.628	47.2634	92.2698	47.736	98.3663	34.1512	21.5921
chr3_149496846_149496848_+	2	3	2	1	0	4	0	3	4	11	5	8	5	19	6	8	10	20	6	10	4	7	0	0	7	8	30.4414	14.0937	8.57607	2.06986	0	178.579	0	120.005	11.6349	57.6614	21.1224	46.397	12.6401	69.8781	13.0914	32.6693	20.5153	55.6041	11.7791	29.835	11.2419	34.1512	0
chr6_7993522_7993579_+	10	14	28	41	13	1	0	4	65	29	48	20	68	25	84	22	69	30	75	41	70	20	0	0	33	10	152.207	65.7706	120.065	84.8643	314.245	44.6449	0	160.006	189.068	152.016	202.775	115.992	171.905	91.9449	183.28	89.8407	141.555	83.4061	147.239	122.323	196.733	97.5748	0
chr9_92705973_92706050_-	1	3	23	17	3	0	0	0	20	7	7	9	36	14	27	7	34	9	41	9	22	11	8	0	31	10	15.2207	14.0937	98.6248	35.1877	72.5181	0	0	0	58.1747	36.6936	29.5713	52.1966	91.0086	51.4891	58.9113	28.5857	69.7519	25.0218	80.4906	26.8515	61.8302	53.6661	57.5788
chr1_201617302_201617373_-	32	50	238	198	44	4	9	8	355	64	276	52	364	95	514	79	481	108	488	91	400	70	23	3	164	35	487.062	234.895	1020.55	409.833	1063.6	178.579	1119.12	320.013	1032.6	335.484	1165.95	301.58	920.198	349.391	1121.5	322.61	986.784	300.262	958.035	271.498	1124.19	341.512	165.539
chr17_88982659_88982739_+	1	4	12	4	2	0	0	0	11	4	3	1	9	6	10	3	12	8	25	8	11	3	0	0	12	2	15.2207	18.7916	51.4564	8.27945	48.3454	0	0	0	31.9961	20.9678	12.6734	5.79962	22.7522	22.0668	21.819	12.251	24.6183	22.2416	49.0797	23.868	30.9151	14.6362	0
chr10_55571014_55571017_+	1	1	6	1	0	0	0	1	3	4	2	5	3	6	3	1	1	1	3	0	5	3	0	0	5	0	15.2207	4.6979	25.7282	2.06986	0	0	0	40.0016	8.72621	20.9678	8.44894	28.9981	7.58405	22.0668	6.5457	4.08367	2.05153	2.7802	5.88956	0	14.0523	14.6362	0
chr3_118295153_118295162_-	31	31	28	59	27	13	3	13	72	102	33	69	73	108	73	135	81	159	86	166	65	148	0	0	20	21	471.842	145.635	120.065	122.122	652.663	580.383	373.042	520.021	209.429	534.678	139.408	400.174	184.545	397.202	159.279	551.295	166.174	442.052	168.834	495.261	182.68	722.053	0
chr14_17557127_17557187_+	2	1	23	25	5	0	0	3	69	4	29	0	57	3	114	11	105	12	110	7	80	4	1	0	26	1	30.4414	4.6979	98.6248	51.7465	120.863	0	0	120.005	200.703	20.9678	122.51	0	144.097	11.0334	248.737	44.9203	215.41	33.3624	215.95	20.8845	224.837	19.515	7.19735
chr10_93471322_93471360_+	0	0	7	2	0	0	0	0	3	1	1	1	5	1	4	1	4	3	3	1	3	2	0	0	3	2	0	0	30.0163	4.13972	0	0	0	0	8.72621	5.24194	4.22447	5.79962	12.6401	3.6778	8.7276	4.08367	8.2061	8.34061	5.88956	2.9835	8.4314	9.75748	0
chr11_63927990_63927992_+	1	0	6	1	0	0	0	0	0	0	0	0	4	1	0	0	5	3	0	0	1	1	0	0	2	0	15.2207	0	25.7282	2.06986	0	0	0	0	0	0	0	0	10.1121	3.6778	0	0	10.2576	8.34061	0	0	2.81047	4.87874	0
chr3_147163879_147163881_+	0	0	5	1	0	0	0	0	2	3	1	2	5	3	3	2	2	1	3	3	8	4	0	0	4	1	0	0	21.4402	2.06986	0	0	0	0	5.81747	15.7258	4.22447	11.5992	12.6401	11.0334	6.5457	8.16733	4.10305	2.7802	5.88956	8.95049	22.4837	19.515	0
chr12_25518247_25518314_+	2	1	4	2	0	2	0	0	3	2	3	2	12	4	12	1	9	4	1	9	9	2	1	0	8	2	30.4414	4.6979	17.1521	4.13972	0	89.2897	0	0	8.72621	10.4839	12.6734	11.5992	30.3362	14.7112	26.1828	4.08367	18.4637	11.1208	1.96319	26.8515	25.2942	9.75748	7.19735
chr13_85540182_85540192_-	1	1	29	25	4	1	0	0	43	8	41	5	43	5	65	9	55	7	65	6	48	3	4	0	23	4	15.2207	4.6979	124.353	51.7465	96.6908	44.6449	0	0	125.076	41.9355	173.203	28.9981	108.705	18.389	141.824	36.753	112.834	19.4614	127.607	17.901	134.902	14.6362	28.7894
chr6_104457666_104457667_+	0	0	7	2	0	0	0	0	1	1	1	1	5	1	7	0	8	1	6	2	5	3	0	0	3	2	0	0	30.0163	4.13972	0	0	0	0	2.90874	5.24194	4.22447	5.79962	12.6401	3.6778	15.2733	0	16.4122	2.7802	11.7791	5.967	14.0523	14.6362	0
chr2_203895793_203895835_+	3	0	2	1	0	0	0	1	1	0	0	1	1	4	0	2	1	1	3	7	0	0	0	0	1	2	45.6621	0	8.57607	2.06986	0	0	0	40.0016	2.90874	0	0	5.79962	2.52802	14.7112	0	8.16733	2.05153	2.7802	5.88956	20.8845	0	0	0
chr1_265310339_265310415_-	2	0	4	3	0	1	0	0	5	0	2	3	3	5	4	2	4	0	9	4	4	1	0	0	4	3	30.4414	0	17.1521	6.20959	0	44.6449	0	0	14.5437	0	8.44894	17.3989	7.58405	18.389	8.7276	8.16733	8.2061	0	17.6687	11.934	11.2419	4.87874	0
chr6_136454281_136454282_-	3	0	2	1	0	0	0	0	2	0	1	0	2	0	2	2	1	1	2	1	2	0	0	0	1	2	45.6621	0	8.57607	2.06986	0	0	0	0	5.81747	0	4.22447	0	5.05603	0	4.3638	8.16733	2.05153	2.7802	3.92637	2.9835	5.62093	0	0
chr2_62345140_62345142_+	3	0	1	0	0	0	0	0	2	0	0	0	1	0	1	2	3	4	2	1	0	1	0	0	1	2	45.6621	0	4.28804	0	0	0	0	0	5.81747	0	0	0	2.52802	0	2.1819	8.16733	6.15458	11.1208	3.92637	2.9835	0	4.87874	0
chr2_155066017_155066033_+	2	1	5	1	0	0	0	0	0	1	3	2	1	2	3	0	0	1	2	2	2	1	0	0	5	0	30.4414	4.6979	21.4402	2.06986	0	0	0	0	0	5.24194	12.6734	11.5992	2.52802	7.35559	6.5457	0	0	2.7802	3.92637	5.967	5.62093	4.87874	0
chr15_18597989_18597991_+	5	13	17	24	3	10	8	10	19	9	20	7	13	9	96	55	87	79	13	13	14	5	1	0	42	38	76.1035	61.0727	72.8966	49.6767	72.5181	446.449	994.777	400.016	55.266	47.1775	84.4894	40.5974	32.8642	33.1002	209.462	224.602	178.483	219.636	25.5214	38.7855	39.3465	24.3937	7.19735
chr18_28984354_28984357_+	0	0	8	4	0	0	0	1	14	6	15	1	15	6	22	2	18	5	16	6	21	6	0	0	5	2	0	0	34.3043	8.27945	0	0	0	40.0016	40.7223	31.4517	63.3671	5.79962	37.9203	22.0668	48.0018	8.16733	36.9275	13.901	31.411	17.901	59.0198	29.2724	0
chr14_9078418_9078493_-	8	7	4	2	1	1	0	1	5	7	1	8	2	16	1	13	2	26	1	24	1	13	1	0	1	13	121.766	32.8853	17.1521	4.13972	24.1727	44.6449	0	40.0016	14.5437	36.6936	4.22447	46.397	5.05603	58.8447	2.1819	53.0877	4.10305	72.2853	1.96319	71.604	2.81047	63.4236	7.19735
chr10_76500592_76500653_+	2	0	4	3	0	0	0	0	6	1	3	0	10	2	5	1	6	4	12	0	5	2	1	0	8	2	30.4414	0	17.1521	6.20959	0	0	0	0	17.4524	5.24194	12.6734	0	25.2802	7.35559	10.9095	4.08367	12.3092	11.1208	23.5582	0	14.0523	9.75748	7.19735
chr14_49728749_49728788_+	1	0	6	1	2	0	0	1	12	3	5	4	12	2	10	3	12	4	10	3	12	2	0	0	2	0	15.2207	0	25.7282	2.06986	48.3454	0	0	40.0016	34.9048	15.7258	21.1224	23.1985	30.3362	7.35559	21.819	12.251	24.6183	11.1208	19.6319	8.95049	33.7256	9.75748	0
chr1_158885431_158885434_+	0	0	2	0	0	0	0	0	4	1	5	4	10	6	4	3	6	2	5	3	11	3	0	0	5	2	0	0	8.57607	0	0	0	0	0	11.6349	5.24194	21.1224	23.1985	25.2802	22.0668	8.7276	12.251	12.3092	5.56041	9.81593	8.95049	30.9151	14.6362	0
chr13_108986964_108986967_+	0	0	2	0	0	0	0	0	6	0	10	1	10	1	10	5	12	1	12	3	5	2	0	0	5	2	0	0	8.57607	0	0	0	0	0	17.4524	0	42.2447	5.79962	25.2802	3.6778	21.819	20.4183	24.6183	2.7802	23.5582	8.95049	14.0523	9.75748	0
chr2_53943812_53943893_+	2	0	11	10	1	0	0	0	15	4	4	4	9	3	21	4	15	6	20	4	13	3	0	1	10	3	30.4414	0	47.1684	20.6986	24.1727	0	0	0	43.631	20.9678	16.8979	23.1985	22.7522	11.0334	45.8199	16.3347	30.7729	16.6812	39.2637	11.934	36.536	14.6362	0
chr3_147163820_147163822_+	1	0	6	4	0	0	0	0	3	0	2	2	9	1	6	0	4	3	11	2	5	3	0	0	7	1	15.2207	0	25.7282	8.27945	0	0	0	0	8.72621	0	8.44894	11.5992	22.7522	3.6778	13.0914	0	8.2061	8.34061	21.595	5.967	14.0523	14.6362	0
chr5_49503881_49503948_+	1	1	5	3	1	0	0	0	13	2	10	3	8	3	12	3	12	3	20	5	13	2	0	0	7	2	15.2207	4.6979	21.4402	6.20959	24.1727	0	0	0	37.8136	10.4839	42.2447	17.3989	20.2241	11.0334	26.1828	12.251	24.6183	8.34061	39.2637	14.9175	36.536	9.75748	0
chr8_20809041_20809114_+	4	6	11	10	1	2	0	1	4	7	4	5	10	10	6	5	13	11	15	10	14	9	1	0	12	8	60.8828	28.1874	47.1684	20.6986	24.1727	89.2897	0	40.0016	11.6349	36.6936	16.8979	28.9981	25.2802	36.778	13.0914	20.4183	26.6698	30.5822	29.4478	29.835	39.3465	43.9087	7.19735
chr2_219409466_219409467_+	0	0	6	1	3	0	0	0	5	1	0	1	6	2	7	2	3	4	12	5	6	2	0	0	7	0	0	0	25.7282	2.06986	72.5181	0	0	0	14.5437	5.24194	0	5.79962	15.1681	7.35559	15.2733	8.16733	6.15458	11.1208	23.5582	14.9175	16.8628	9.75748	0
chr14_102264579_102264672_-	4	3	21	20	2	0	0	0	29	9	18	10	25	15	19	8	40	9	35	12	27	7	9	0	28	12	60.8828	14.0937	90.0488	41.3972	48.3454	0	0	0	84.3533	47.1775	76.0405	57.9962	63.2004	55.1669	41.4561	32.6693	82.061	25.0218	68.7115	35.802	75.8826	34.1512	64.7762
chr2_224295931_224295999_-	2	2	9	6	1	1	0	1	12	6	3	1	11	7	13	5	12	5	14	3	5	2	1	1	10	3	30.4414	9.3958	38.5923	12.4192	24.1727	44.6449	0	40.0016	34.9048	31.4517	12.6734	5.79962	27.8082	25.7446	28.3647	20.4183	24.6183	13.901	27.4846	8.95049	14.0523	9.75748	7.19735
chr9_62222829_62222907_+	29	26	9	12	1	9	0	6	12	88	15	83	19	158	24	108	21	159	38	176	13	116	2	11	13	47	441.4	122.145	38.5923	24.8383	24.1727	401.804	0	240.01	34.9048	461.291	63.3671	481.369	48.0323	581.092	52.3656	441.036	43.082	442.052	74.6011	525.096	36.536	565.934	14.3947
chr2_157283046_157283135_+	7	7	15	21	4	3	2	2	49	18	29	14	56	12	52	14	53	21	44	18	35	13	0	0	21	5	106.545	32.8853	64.3205	43.4671	96.6908	133.935	248.694	80.0032	142.528	94.355	122.51	81.1947	141.569	44.1335	113.459	57.1713	108.731	58.3843	86.3802	53.703	98.3663	63.4236	0
chr2_190663827_190663884_-	1	1	15	8	0	0	0	1	18	1	21	3	21	2	44	2	37	5	44	4	27	4	1	0	7	0	15.2207	4.6979	64.3205	16.5589	0	0	0	40.0016	52.3572	5.24194	88.7139	17.3989	53.0884	7.35559	96.0036	8.16733	75.9065	13.901	86.3802	11.934	75.8826	19.515	7.19735
chr6_126832142_126832225_+	3	0	1	1	0	0	0	0	1	5	1	6	1	4	1	0	1	12	1	8	0	5	0	0	1	5	45.6621	0	4.28804	2.06986	0	0	0	0	2.90874	26.2097	4.22447	34.7977	2.52802	14.7112	2.1819	0	2.05153	33.3624	1.96319	23.868	0	24.3937	0
chr9_90352229_90352317_+	0	0	6	0	0	0	0	0	4	2	1	1	5	1	1	0	0	6	2	1	3	0	0	0	4	0	0	0	25.7282	0	0	0	0	0	11.6349	10.4839	4.22447	5.79962	12.6401	3.6778	2.1819	0	0	16.6812	3.92637	2.9835	8.4314	0	0
chrX_3533425_3533493_-	3	1	2	1	0	2	0	0	1	5	1	7	0	21	2	12	0	22	2	31	0	13	1	0	2	8	45.6621	4.6979	8.57607	2.06986	0	89.2897	0	0	2.90874	26.2097	4.22447	40.5974	0	77.2337	4.3638	49.004	0	61.1645	3.92637	92.4884	0	63.4236	7.19735
chr11_75360536_75360632_-	3	15	53	26	10	1	5	1	84	11	71	18	116	20	148	30	176	42	170	34	116	16	0	0	63	8	45.6621	70.4685	227.266	53.8164	241.727	44.6449	621.736	40.0016	244.334	57.6614	299.937	104.393	293.25	73.5559	322.921	122.51	361.069	116.769	333.742	101.439	326.014	78.0598	0
chr4_163015539_163015543_-	1	3	7	5	5	3	1	3	12	6	12	8	16	14	30	23	24	20	25	18	19	14	0	0	14	4	15.2207	14.0937	30.0163	10.3493	120.863	133.935	124.347	120.005	34.9048	31.4517	50.6937	46.397	40.4483	51.4891	65.457	93.9243	49.2366	55.6041	49.0797	53.703	53.3988	68.3023	0
chr5_169530396_169530397_+	4	1	2	0	0	0	0	0	0	4	0	4	0	12	1	7	0	12	2	15	2	8	0	1	1	4	60.8828	4.6979	8.57607	0	0	0	0	0	0	20.9678	0	23.1985	0	44.1335	2.1819	28.5857	0	33.3624	3.92637	44.7525	5.62093	39.0299	0
chrX_70326949_70327043_+	2	5	17	10	2	0	0	0	17	9	10	13	29	18	6	5	13	16	20	24	13	7	1	2	13	10	30.4414	23.4895	72.8966	20.6986	48.3454	0	0	0	49.4485	47.1775	42.2447	75.3951	73.3125	66.2003	13.0914	20.4183	26.6698	44.4832	39.2637	71.604	36.536	34.1512	7.19735
chr10_40439638_40439719_-	0	3	21	11	0	0	0	0	33	2	15	5	25	3	59	0	46	6	37	7	41	4	3	0	25	3	0	14.0937	90.0488	22.7685	0	0	0	0	95.9883	10.4839	63.3671	28.9981	63.2004	11.0334	128.732	0	94.3702	16.6812	72.6379	20.8845	115.229	19.515	21.5921
chr8_50765782_50765791_+	0	0	0	0	0	3	0	0	0	1	5	4	0	0	12	8	3	6	3	1	0	1	0	0	11	4	0	0	0	0	0	133.935	0	0	0	5.24194	21.1224	23.1985	0	0	26.1828	32.6693	6.15458	16.6812	5.88956	2.9835	0	4.87874	0
chr2_192539667_192539754_-	3	3	8	8	1	0	0	0	6	3	2	1	16	5	10	7	18	4	11	7	15	1	0	0	14	3	45.6621	14.0937	34.3043	16.5589	24.1727	0	0	0	17.4524	15.7258	8.44894	5.79962	40.4483	18.389	21.819	28.5857	36.9275	11.1208	21.595	20.8845	42.157	4.87874	0
chr6_73101340_73101342_+	1	2	5	3	1	0	0	0	3	1	3	0	7	1	6	2	8	1	12	2	7	3	0	0	8	4	15.2207	9.3958	21.4402	6.20959	24.1727	0	0	0	8.72621	5.24194	12.6734	0	17.6961	3.6778	13.0914	8.16733	16.4122	2.7802	23.5582	5.967	19.6733	14.6362	0
chr1_213390537_213390558_+	0	0	1	0	2	0	1	1	24	2	18	2	23	9	21	3	31	4	24	4	18	2	0	0	14	0	0	0	4.28804	0	48.3454	0	124.347	40.0016	69.8097	10.4839	76.0405	11.5992	58.1444	33.1002	45.8199	12.251	63.5973	11.1208	47.1165	11.934	50.5884	9.75748	0
chr10_5055855_5055953_-	1	2	7	3	0	0	0	0	8	4	4	0	6	3	8	4	11	0	9	1	5	1	0	0	7	2	15.2207	9.3958	30.0163	6.20959	0	0	0	0	23.2699	20.9678	16.8979	0	15.1681	11.0334	17.4552	16.3347	22.5668	0	17.6687	2.9835	14.0523	4.87874	0
chr10_83044193_83044195_-	3	1	3	2	0	0	0	3	3	10	2	7	4	17	1	6	5	11	7	11	5	8	0	0	2	4	45.6621	4.6979	12.8641	4.13972	0	0	0	120.005	8.72621	52.4194	8.44894	40.5974	10.1121	62.5225	2.1819	24.502	10.2576	30.5822	13.7423	32.8185	14.0523	39.0299	0
chr7_96096155_96096156_+	0	2	5	0	1	0	2	0	6	3	8	4	10	9	10	11	20	16	25	9	15	5	0	0	6	4	0	9.3958	21.4402	0	24.1727	0	248.694	0	17.4524	15.7258	33.7958	23.1985	25.2802	33.1002	21.819	44.9203	41.0305	44.4832	49.0797	26.8515	42.157	24.3937	0
chr4_185678114_185678116_+	1	0	3	1	1	0	0	0	2	0	1	0	4	0	1	2	2	4	7	1	0	2	1	0	7	2	15.2207	0	12.8641	2.06986	24.1727	0	0	0	5.81747	0	4.22447	0	10.1121	0	2.1819	8.16733	4.10305	11.1208	13.7423	2.9835	0	9.75748	7.19735
chr10_87582869_87582879_+	0	1	7	3	0	0	0	0	2	2	1	0	3	2	1	1	2	0	7	2	6	3	0	0	6	2	0	4.6979	30.0163	6.20959	0	0	0	0	5.81747	10.4839	4.22447	0	7.58405	7.35559	2.1819	4.08367	4.10305	0	13.7423	5.967	16.8628	14.6362	0
chr3_75963592_75963666_+	2	1	11	4	0	0	0	0	15	6	9	5	13	2	5	3	8	6	18	11	7	5	4	1	14	2	30.4414	4.6979	47.1684	8.27945	0	0	0	0	43.631	31.4517	38.0202	28.9981	32.8642	7.35559	10.9095	12.251	16.4122	16.6812	35.3374	32.8185	19.6733	24.3937	28.7894
chr19_11623032_11623035_-	5	4	8	6	0	0	0	0	11	5	6	9	23	10	6	8	18	18	17	19	16	19	0	0	6	2	76.1035	18.7916	34.3043	12.4192	0	0	0	0	31.9961	26.2097	25.3468	52.1966	58.1444	36.778	13.0914	32.6693	36.9275	50.0436	33.3742	56.6865	44.9674	92.696	0
chr3_104910293_104910295_-	1	2	11	1	2	0	1	0	34	16	20	9	32	13	32	10	28	16	42	14	33	13	1	1	8	2	15.2207	9.3958	47.1684	2.06986	48.3454	0	124.347	0	98.897	83.8711	84.4894	52.1966	80.8965	47.8113	69.8208	40.8367	57.4427	44.4832	82.4538	41.769	92.7453	63.4236	7.19735
chr2_140456543_140456546_-	0	2	5	1	3	0	0	3	15	6	15	4	20	10	30	9	30	12	24	18	23	5	0	0	9	3	0	9.3958	21.4402	2.06986	72.5181	0	0	120.005	43.631	31.4517	63.3671	23.1985	50.5603	36.778	65.457	36.753	61.5458	33.3624	47.1165	53.703	64.6407	24.3937	0
chr6_72685269_72685271_+	2	0	3	0	0	0	0	0	1	1	0	0	1	2	1	0	2	2	0	2	1	0	0	0	2	0	30.4414	0	12.8641	0	0	0	0	0	2.90874	5.24194	0	0	2.52802	7.35559	2.1819	0	4.10305	5.56041	0	5.967	2.81047	0	0
chr2_181265828_181265896_+	3	0	1	0	0	0	0	0	1	1	1	1	1	0	0	3	2	7	0	5	0	2	0	0	2	1	45.6621	0	4.28804	0	0	0	0	0	2.90874	5.24194	4.22447	5.79962	2.52802	0	0	12.251	4.10305	19.4614	0	14.9175	0	9.75748	0
chr7_27866038_27866044_+	0	1	9	4	0	0	0	0	7	2	3	1	12	1	10	1	7	1	17	2	7	0	0	1	13	1	0	4.6979	38.5923	8.27945	0	0	0	0	20.3611	10.4839	12.6734	5.79962	30.3362	3.6778	21.819	4.08367	14.3607	2.7802	33.3742	5.967	19.6733	0	0
chr9_105846574_105846642_-	2	0	1	0	1	0	0	0	4	11	1	7	3	17	3	7	2	12	2	21	0	12	1	0	4	4	30.4414	0	4.28804	0	24.1727	0	0	0	11.6349	57.6614	4.22447	40.5974	7.58405	62.5225	6.5457	28.5857	4.10305	33.3624	3.92637	62.6535	0	58.5449	7.19735
chr2_30508247_30508250_-	8	19	32	13	11	8	3	3	72	25	64	18	84	22	123	35	106	28	107	42	76	30	7	2	43	17	121.766	89.2601	137.217	26.9082	265.9	357.159	373.042	120.005	209.429	131.049	270.366	104.393	212.353	80.9115	268.374	142.928	217.462	77.8457	210.061	125.307	213.595	146.362	50.3815
chr10_4977361_4977452_-	3	1	2	0	0	0	0	1	2	1	0	2	2	1	2	1	0	4	4	3	1	1	0	0	3	1	45.6621	4.6979	8.57607	0	0	0	0	40.0016	5.81747	5.24194	0	11.5992	5.05603	3.6778	4.3638	4.08367	0	11.1208	7.85275	8.95049	2.81047	4.87874	0
chr1_64172497_64172498_-	1	2	9	1	1	0	0	0	14	2	6	2	12	4	5	8	11	8	4	8	11	4	0	0	1	4	15.2207	9.3958	38.5923	2.06986	24.1727	0	0	0	40.7223	10.4839	25.3468	11.5992	30.3362	14.7112	10.9095	32.6693	22.5668	22.2416	7.85275	23.868	30.9151	19.515	0
chr10_46051046_46051047_+	2	0	1	0	0	0	0	0	0	0	0	0	0	0	0	1	0	0	1	0	0	1	0	0	2	2	30.4414	0	4.28804	0	0	0	0	0	0	0	0	0	0	0	0	4.08367	0	0	1.96319	0	0	4.87874	0
chr10_67691291_67691358_+	4	12	19	11	2	0	1	0	13	15	8	5	11	10	15	14	13	14	18	16	14	7	0	0	21	8	60.8828	56.3748	81.4727	22.7685	48.3454	0	124.347	0	37.8136	78.6291	33.7958	28.9981	27.8082	36.778	32.7285	57.1713	26.6698	38.9228	35.3374	47.736	39.3465	34.1512	0
chr1_204883469_204883549_-	2	2	10	9	1	0	0	1	11	2	10	2	20	4	11	4	12	13	13	4	9	5	1	1	14	5	30.4414	9.3958	42.8804	18.6288	24.1727	0	0	40.0016	31.9961	10.4839	42.2447	11.5992	50.5603	14.7112	24.0009	16.3347	24.6183	36.1426	25.5214	11.934	25.2942	24.3937	7.19735
chr7_74189462_74189468_-	10	12	41	40	6	4	1	1	53	8	46	13	66	10	113	25	75	21	58	13	57	15	14	7	65	27	152.207	56.3748	175.809	82.7945	145.036	178.579	124.347	40.0016	154.163	41.9355	194.326	75.3951	166.849	36.778	246.555	102.092	153.864	58.3843	113.865	38.7855	160.197	73.1811	100.763
chr13_1344046_1344128_-	5	4	4	1	0	1	0	0	0	11	1	10	0	11	0	8	0	15	2	20	1	7	0	0	0	8	76.1035	18.7916	17.1521	2.06986	0	44.6449	0	0	0	57.6614	4.22447	57.9962	0	40.4558	0	32.6693	0	41.703	3.92637	59.67	2.81047	34.1512	0
chr5_127418066_127418147_+	1	1	5	2	0	0	0	0	4	2	2	1	3	2	6	1	0	0	4	3	1	2	1	0	5	5	15.2207	4.6979	21.4402	4.13972	0	0	0	0	11.6349	10.4839	8.44894	5.79962	7.58405	7.35559	13.0914	4.08367	0	0	7.85275	8.95049	2.81047	9.75748	7.19735
chr4_62924212_62924297_-	3	12	58	46	13	6	1	6	103	18	89	13	104	15	253	39	217	38	192	20	113	13	3	0	67	9	45.6621	56.3748	248.706	95.2137	314.245	267.869	124.347	240.01	299.6	94.355	375.978	75.3951	262.914	55.1669	552.021	159.263	445.181	105.648	376.932	59.67	317.583	63.4236	21.5921
chr9_106325688_106325777_-	3	1	1	0	0	1	0	0	1	1	1	3	1	3	3	1	2	14	4	6	1	3	0	0	1	4	45.6621	4.6979	4.28804	0	0	44.6449	0	0	2.90874	5.24194	4.22447	17.3989	2.52802	11.0334	6.5457	4.08367	4.10305	38.9228	7.85275	17.901	2.81047	14.6362	0
chr12_8719686_8719737_-	0	4	21	10	5	0	0	2	77	9	45	14	84	12	67	19	92	17	100	20	79	18	0	0	20	3	0	18.7916	90.0488	20.6986	120.863	0	0	80.0032	223.973	47.1775	190.101	81.1947	212.353	44.1335	146.187	77.5897	188.74	47.2634	196.319	59.67	222.027	87.8173	0
chr3_149491163_149491164_+	0	0	5	0	0	0	0	0	3	3	1	0	2	3	6	3	2	7	2	6	3	1	0	0	5	0	0	0	21.4402	0	0	0	0	0	8.72621	15.7258	4.22447	0	5.05603	11.0334	13.0914	12.251	4.10305	19.4614	3.92637	17.901	8.4314	4.87874	0
chr10_18564254_18564293_-	1	0	3	1	3	0	0	0	2	6	10	1	3	5	5	1	5	4	5	4	3	1	0	0	2	3	15.2207	0	12.8641	2.06986	72.5181	0	0	0	5.81747	31.4517	42.2447	5.79962	7.58405	18.389	10.9095	4.08367	10.2576	11.1208	9.81593	11.934	8.4314	4.87874	0
chr13_107834072_107834167_+	5	3	4	3	5	2	0	3	5	7	5	5	11	10	12	9	11	18	17	9	4	11	1	0	6	4	76.1035	14.0937	17.1521	6.20959	120.863	89.2897	0	120.005	14.5437	36.6936	21.1224	28.9981	27.8082	36.778	26.1828	36.753	22.5668	50.0436	33.3742	26.8515	11.2419	53.6661	7.19735
chr14_110771095_110771113_+	7	4	5	3	2	1	0	1	2	26	5	25	2	37	5	18	8	26	1	22	1	28	1	4	3	18	106.545	18.7916	21.4402	6.20959	48.3454	44.6449	0	40.0016	5.81747	136.29	21.1224	144.991	5.05603	136.078	10.9095	73.506	16.4122	72.2853	1.96319	65.637	2.81047	136.605	7.19735
chr16_69225787_69225863_+	1	0	3	1	0	0	0	0	1	1	1	2	2	2	0	1	0	1	1	1	2	1	0	0	2	3	15.2207	0	12.8641	2.06986	0	0	0	0	2.90874	5.24194	4.22447	11.5992	5.05603	7.35559	0	4.08367	0	2.7802	1.96319	2.9835	5.62093	4.87874	0
chr4_160631193_160631194_-	4	2	1	1	1	0	0	1	2	8	0	8	2	17	2	9	2	15	0	15	1	8	0	0	2	7	60.8828	9.3958	4.28804	2.06986	24.1727	0	0	40.0016	5.81747	41.9355	0	46.397	5.05603	62.5225	4.3638	36.753	4.10305	41.703	0	44.7525	2.81047	39.0299	0
chr7_10319946_10319950_+	3	5	15	18	3	4	1	3	18	14	20	17	37	15	34	20	33	27	27	23	29	14	1	0	18	12	45.6621	23.4895	64.3205	37.2575	72.5181	178.579	124.347	120.005	52.3572	73.3872	84.4894	98.5936	93.5366	55.1669	74.1846	81.6733	67.7004	75.0655	53.006	68.6205	81.5035	68.3023	7.19735
chr1_135242837_135242863_+	3	3	12	10	0	1	0	3	28	8	15	10	19	13	29	7	34	6	36	12	20	9	1	1	16	3	45.6621	14.0937	51.4564	20.6986	0	44.6449	0	120.005	81.4446	41.9355	63.3671	57.9962	48.0323	47.8113	63.2751	28.5857	69.7519	16.6812	70.6747	35.802	56.2093	43.9087	7.19735
chr3_3493752_3493793_+	14	17	17	20	1	1	0	7	17	36	19	27	15	40	33	48	29	51	25	58	24	34	0	0	10	10	213.09	79.8643	72.8966	41.3972	24.1727	44.6449	0	280.011	49.4485	188.71	80.265	156.59	37.9203	147.112	72.0027	196.016	59.4943	141.79	49.0797	173.043	67.4512	165.877	0
chr7_95820051_95820092_+	1	0	5	1	0	0	0	0	11	1	7	1	12	2	8	3	17	6	21	7	22	5	0	0	3	0	15.2207	0	21.4402	2.06986	0	0	0	0	31.9961	5.24194	29.5713	5.79962	30.3362	7.35559	17.4552	12.251	34.8759	16.6812	41.2269	20.8845	61.8302	24.3937	0
chr4_37635467_37635551_-	4	2	1	0	0	0	0	0	2	8	0	8	1	25	0	9	0	14	4	22	3	12	0	0	1	5	60.8828	9.3958	4.28804	0	0	0	0	0	5.81747	41.9355	0	46.397	2.52802	91.9449	0	36.753	0	38.9228	7.85275	65.637	8.4314	58.5449	0
chr5_35477165_35477191_-	0	0	2	0	2	0	0	0	1	3	1	2	6	1	8	5	2	2	1	6	1	1	0	0	2	5	0	0	8.57607	0	48.3454	0	0	0	2.90874	15.7258	4.22447	11.5992	15.1681	3.6778	17.4552	20.4183	4.10305	5.56041	1.96319	17.901	2.81047	4.87874	0
chr2_192603597_192603688_-	0	0	14	11	0	0	1	2	5	3	8	1	11	1	8	2	17	6	19	2	10	1	1	0	12	2	0	0	60.0325	22.7685	0	0	124.347	80.0032	14.5437	15.7258	33.7958	5.79962	27.8082	3.6778	17.4552	8.16733	34.8759	16.6812	37.3005	5.967	28.1047	4.87874	7.19735
chr10_5002194_5002288_-	2	0	1	1	0	0	0	0	4	0	4	3	2	3	2	1	3	2	3	4	3	2	0	0	6	2	30.4414	0	4.28804	2.06986	0	0	0	0	11.6349	0	16.8979	17.3989	5.05603	11.0334	4.3638	4.08367	6.15458	5.56041	5.88956	11.934	8.4314	9.75748	0
chr8_20788559_20788606_+	0	0	6	3	0	0	0	0	2	7	4	2	9	4	2	3	2	0	2	1	4	6	0	0	7	1	0	0	25.7282	6.20959	0	0	0	0	5.81747	36.6936	16.8979	11.5992	22.7522	14.7112	4.3638	12.251	4.10305	0	3.92637	2.9835	11.2419	29.2724	0
[truncated: 46,469 more rows]
[truncated: 31 more columns]

## Sheet: legend
id	identifier of the CAGEscan cluster (consisting of, seperatad by underline: chromosome, most 5' position of the Paraclu cluster, most 3' position of the Paraclu cluster, strand)
[truncated: 30 more rows]
