# Supplementary material for: Digital expression profiling of the compartmentalized translatome of Purkinje neurons
Source: HighWire-hosted journal article supplement (doi:10.1101/gr.164095.113), 2014-06-05
Supplement: Supplemental_Table.S4.xlsx [file Supplemental_Table.S4.xlsx]

## Sheet: table S4
All	us only	Doyle only	CDT only	us and CDT not Doyle	CDT and Doyle not us	us and Doyle not CDT
Adam23	.	0610007P14Rik	0610010K14Rik	Aak1	2310011J03Rik	1500009C09Rik
Anks1b	0610010O12Rik	0610009B14Rik	1110059E24Rik	Abat	Acp1	1500016L03Rik
Ap2b1	1600012H06Rik	0610009B22Rik	1700019L03Rik	Aco2	Ankrd6	3110047P20Rik
Auts2	Aatf	0610009D07Rik	1700025G04Rik	Akap9	Anxa5	Aagab
Cacnb2	Abi3bp	0610009L18Rik	1700029J07Rik	Ank1	Arl16	Abr
Car8	Ablim2	0610011F06Rik	1810013L24Rik	Ank2	Arntl	Actb
Cep76	Acot7	0610012G03Rik	1810055G02Rik	Anxa6	Ash2l	Adarb1
Clmn	Acsf2	0610037L13Rik	2310035C23Rik	Arcn1	Atp5g1	Agfg1
Clvs2	Actg1	0610040B09Rik	2410089E03Rik	Atp1b1	Btbd1	Agfg2
Ddx5	Actr1a	0610040B10Rik	2810021B07Rik	Atp2a2	C230004F18Rik	Akap2
Dgki	Actr1b	1110001A16Rik	3110082I17Rik	Atp2b2	C230034O21Rik	Akr1a1
Dlgap4	Adam12	1110002E22Rik	4632411B12Rik	Atp6v0a1	Ccni	Aldoa
Dpp10	Aff1	1110004E09Rik	4632427E13Rik	Cacnb4	Cct4	Anapc5
Dync1i1	Akap5	1110008L16Rik	4732418C07Rik	Calm1	Cdca8	Arap1
Gng13	Akap6	1110008P14Rik	4833439L19Rik	Cdc123	Cdh11	Arap2
Gorasp2	Akap7	1110019D14Rik	4930555F03Rik	Cdc42bpa	Cdv3	Arhgap12
Hdac11	Aldh9a1	1110020A21Rik	4933407C03Rik	Cttn	Cep72	Arhgap26
Hdlbp	Aldoc	1110032A03Rik	4933409K07Rik	Dclk1	Chd1	Arhgap31
Ivns1abp	Amot	1110038B12Rik	4933434E20Rik	Dlgap1	Clic6	Arhgap32
Lphn2	Anapc1	1110038F14Rik	5330426P16Rik	Eif4g1	Commd7	Arhgap5
Lrrfip1	Ankrd23	1110051M20Rik	5730494M16Rik	Elmod1	Cspg5	Arpc5l
Ndufa6	Ankrd52	1110058L19Rik	6330403K07Rik	Eno2	Ebf1	Asnsd1
Nnt	Apbb3	1110065P20Rik	6330549D23Rik	Fam168a	Ebf3	Asph
Nsg1	Api5	1190002N15Rik	6430704M03Rik	Fyttd1	Ece2	Atl2
Nutf2	Apoa5	1500011K16Rik	9030425E11Rik	G3bp2	Eepd1	Atox1
Plxdc2	Arf4	1500032L24Rik	A830039N20Rik	Gab2	Eif2d	Atp2a3
Pole4	Arih2	1500035N22Rik	AA986860	Gabarapl2	Eif4e2	Atp8a2
Praf2	Armc1	1700008B15Rik	Aard	Gramd1b	Ell3	Atpaf1
Rgs8	Armcx4	1700011M02Rik	AB041803	Gspt1	Elovl6	Atrnl1
Tpm1	Arpc5l2	1700015G11Rik	Abhd6	Gtf2i	Ensa	Atxn1l
Trio	Astn1	1700021F05Rik	Acaca	Hsp90ab1	Epha5	B3gnt5
Ywhab	Atg9a	1700023E05Rik	Acbd3	Hsph1	F2r	Bag5
NA	Atp1a3	1700028P14Rik	Acbd6	Ide	Fam188a	Bcar1
NA	Atp5a1	1700037C18Rik	Actc1	Kif21a	Frmd5	Bcl11a
NA	Atp5b	1700037H04Rik	Actn3	Kif3a	G6pdx	Bod1
NA	Atp5g3	1700049E17Rik1	Adam22	Kpnb1	Garnl3	Cacna1g
NA	Atp5o	1700066D14Rik	Adcy6	Magi2	Gigyf2	Calb1
NA	Atp6v0c	1700073E17Rik	Adcy9	Myo18a	Gna13	Calm3
NA	Atp6v1a	1700101I19Rik	Adh5	Nav1	Gprasp1	Camk2a
NA	Atxn2	1700120C18Rik	Afap1	Ndufa10	Grip1	Car7
NA	Azin1	1810022K09Rik	Aftph	Ngfrap1	Gtf2h5	Casq2
NA	Barx2-ps1	1810037I17Rik	Agrn	Nkain3	Hnrnpab	Ccdc50
NA	Bau3	1810043G02Rik	Ahcy	Ntm	Hspa9	Ccdc85a
NA	Bbx	1810043H04Rik	Ahsa2	Oaz1	Hspe1	Cdc37l1
NA	BC003266	1810058I24Rik	AI118078	Pafah1b2	Ift57	Cdca7l
NA	BC035044	1810058N15Rik	AI314976	Pde4d	Igf2bp3	Cdk16
NA	Bcat1	1810062O18Rik	Alcam	Pde4dip	Iltifb	Cdr2
NA	Blcap	2010012O05Rik	Amph	Pex1	Isca2	Cds1
NA	Bloc1s2	2010107E04Rik	Ank3	Plcb4	Itgb1bp1	Cend1
NA	Bola3	2010320M18Rik	Ankrd11	Prdx2	Khnyn	Cerk
NA	Brms1l	2200002D01Rik	Ankrd50	Prickle1	Kndc1	Chchd2
NA	Brsk1	2210016F16Rik	Anxa4	Ptprm	Krtcap2	Chn1
NA	Bsg	2210039B01Rik	Ap3b1	Pvalb	Luzp2	Cisd1
NA	Btbd9	2210418O10Rik	Ap3m1	R3hdm1	Med9	Clec11a
NA	Cacna1a	2310003H01Rik	Ap4s1	Riok3	Mettl8	Clstn3
NA	Cacna2d2	2310007J06Rik	Apba1	Rpl29	Mrpl18	Cnih2
NA	Cacng7	2310008H09Rik	Aplnr	Rtn1	Msi2	Col18a1
NA	Cadm1	2310009A05Rik	Aplp2	Sel1l	Mtmr2	Coq5
NA	Calm2	2310009B15Rik	App	Slc25a3	Mybbp1a	Coro2b
NA	Camlg	2310010G23Rik	Aqp11	Smarca4	Myl12b	Cpne8
NA	Camta2	2310010J17Rik	Arhgef3	Sorl1	Myo9a	Csdc2
NA	Casc3	2310034G01Rik	Arid1a	Spcs2	Nav2	Cttnbp2
NA	Cbx5	2310045N01Rik	Arl3	St13	Ncoa2	Cyb5b
NA	Ccdc104	2310047M10Rik	Arpc3	Sybu	Ndufa12	Cyth3
NA	Ccdc11	2310061I04Rik	Astn2	Tfam	Ndufs4	D2Wsu81e
NA	Ccdc148	2310076G05Rik	Atp1a2	Ttc3	Ndufv3	Dach1
NA	Cd274	2410003L11Rik	Atp2a1	NA	Nfu1	Dagla
NA	Cd83	2410015M20Rik	Atp5j	NA	Nip7	Dap
NA	Celf1	2410124H12Rik	Atp5sl	NA	Nlk	Dbndd1
NA	Chd5	2500004C02Rik	Atp6ap1	NA	Nr6a1	Dbndd2
NA	Chga	2610001J05Rik	Atp6v1b2	NA	Nudt13	Dcun1d5
NA	Chmp3	2610019F03Rik	Atp8a1	NA	Nup50	Degs1
NA	Chtf8	2610028H24Rik	Atxn10	NA	Orc3	Dgkg
NA	Ckap5	2610203C20Rik	AW554918	NA	Orc4	Dgkh
NA	Ckb	2610305D13Rik	Axl	NA	Pbx3	Dgkz
NA	Ckmt1b	2700094K13Rik	B230120H23Rik	NA	Pcdhb19	Dhrs3
NA	Clasp1	2700099C18Rik	B930095G15Rik	NA	Phtf2	Dlg2
NA	Clec16a	2810004N23Rik	Bai3	NA	Plcb1	Dnaja4
NA	Cmpk1	2810025M15Rik	Bax	NA	Ppif	Dner
NA	Cntnap5c	2810047C21Rik1	BC030476	NA	Ppp2ca	Doc2b
NA	Cog2	2810403A07Rik	Bcl2l13	NA	Prep	Eif5a2
NA	Cog7	2810403D21Rik	Bgn	NA	Prmt7	Eme2
NA	Cops5	2810414N06Rik	Bicc1	NA	Psenen	Eml1
NA	Coro1c	2810416G20Rik	Bin1	NA	Ptprk	Eps8l2
NA	Cox5a	2810428I15Rik	Bivm	NA	Rab24	Ergic1
NA	Cox5b	2900008C10Rik	Bptf	NA	Ralyl	Erp29
NA	Cox6a1	2900009J06Rik	Brd8	NA	Rnf130	Espn
NA	Cox7a2l	2900011G08Rik	Brpf1	NA	Rnf14	Fahd2a
NA	Crlf3	2900052N01Rik	Brwd3	NA	Rnf157	Fam107b
NA	Crmp1	2900056L01Rik	Btbd7	NA	Rnf7	Far2
NA	Ctps	3110007F17Rik	Btf3	NA	Rpl35	Fbxo2
NA	Cyfip2	3110040N11Rik	Btg1	NA	Rpl37	Fgf11
NA	Cyth1	3632451O06Rik	Bzw2	NA	Rps21	Fhod3
NA	Cyth2	4732415M23Rik	C030014I23Rik	NA	Rps6	Foxp4
NA	D430041D05Rik	4833418N02Rik	C1galt1c1	NA	S100a10	Fundc2
NA	Dad1	4833420G17Rik	Cachd1	NA	Sec61b	Gabarapl1
NA	Dbn1	4833424O15Rik	Cacna1d	NA	Sema6a	Gabbr1
NA	Dbnl	4833427F10Rik	Cacna1e	NA	Senp2	Gas8
NA	Dctn1	4921530L18Rik	Cacna2d1	NA	Serf1	Gdap1
NA	Dctn2	4930414L22Rik	Caln1	NA	Sf3b5	Glrx3
NA	Dcun1d4	4930429B21Rik	Camk2d	NA	Sh3kbp1	Gnal
NA	Ddrgk1	4930444A02Rik	Camta1	NA	Slk	Gosr2
NA	Ddt	4930444E06Rik	Car10	NA	Snapc3	Gpr63
NA	Diras1	4930452B06Rik	Carm1	NA	Srgap2	Grid2
NA	Dlst	4930453N24Rik	Cbfb	NA	Swi5	Grid2ip
NA	Dmd	4930507D05Rik	Cbr1	NA	Tada1	Grik1
NA	Dnaja1	4930520O04Rik	Ccar1	NA	Tbca	Gsto1
NA	Dnaja2	4930524J08Rik	Ccdc109a	NA	Tex261	Hes3
NA	Dnaja3	4930528A17Rik	Ccdc58	NA	Timm8a1	Homer3
NA	Dnajb12	4930538K18Rik	Ccdc72	NA	Timm8b	Hpca
NA	Dnajb2	4930556A12Rik	Ccnb1	NA	Tln1	Hspa14
NA	Dnajb6	4930563E22Rik	Ccnh	NA	Tmem11	Htr1b
NA	Dnajc16	4931428F04Rik	Cct2	NA	Tmem164	Icmt
NA	Dnajc3	4932441J04Rik	Cct3	NA	Trappc2l	Id2
NA	Dnajc6	4933400F03Rik	CD00022	NA	Trim27	Igf1
NA	Dnm1	4933401H06Rik	CD00041	NA	Tsc22d1	Inpp4a
NA	Dock3	4933404O12Rik	CD00063	NA	Ttll9	Inpp5a
NA	Dpf1	4933423P22Rik	CD00071	NA	Ube2k	Isca1
NA	Drosha	4933424C08Rik	CD00091	NA	Wdr59	Itpka
NA	Dst	5031425E22Rik	CD00093	NA	Wdr85	Itpr1
NA	Dtd1	5330417C22Rik	CD00094	NA	Xpr1	Kalrn
NA	Dync2li1	5430416G10Rik	CD00095	NA	Yrdc	Kcnab1
NA	Dynll1	5430416N02Rik	CD00096	NA	Ywhae	Kcnip1
NA	Ece1	5430427G11Rik	CD00114	NA	Zbtb38	Kcnip4
NA	Eef1g	5430439G13Rik	CD00118	NA	NA	Kcnma1
NA	Eif1b	5530601H04Rik	CD00134	NA	NA	Kif3c
NA	Eif5b	5730508B09Rik	CD00144	NA	NA	Lancl1
NA	Elavl3	5830448L01Rik	CD00162	NA	NA	Large
NA	Elmo1	5930412G12Rik	CD00167	NA	NA	Larp1
NA	Epb41l3	6030419C18Rik	CD00172	NA	NA	Lasp1
NA	Evl	6030445D17Rik	CD00190	NA	NA	Lhx1
NA	Exoc6b	6330415G19Rik	CD00193	NA	NA	Lmo7
NA	Fads6	6430531B16Rik	CD00216	NA	NA	Lpcat4
NA	Fam100a	6430706D22Rik	CD00221	NA	NA	Lpgat1
NA	Fam101b	6430710C18Rik	CD00240	NA	NA	Lrch1
NA	Fam107a	6720407P12Rik	CD00242	NA	NA	Lsmd1
NA	Fam125b	6720468P15Rik	CD00244	NA	NA	Map7d2
NA	Fam134b	6720489N17Rik	CD00249	NA	NA	Mef2c
NA	Fam160b2	6820445E23Rik	CD00255	NA	NA	Mink1
NA	Fam184b	8030476L19Rik	CD00257	NA	NA	Mlf2
NA	Fam189b	8030497O21Rik	CD00261	NA	NA	Mpc1
NA	Fam21c	8430408G22Rik	CD00264	NA	NA	Mpi
NA	Fam222a	8430419L09Rik	CD00273	NA	NA	Mprip
NA	Fam3c	8430427H17Rik	CD00275	NA	NA	Mreg
NA	Fam40b	9130221H12Rik	CD00282	NA	NA	Mrpl54
NA	Fam49a	9130230N09Rik	CD00291	NA	NA	Mrps16
NA	Fam53c	9130401M01Rik	CD00294	NA	NA	Mrps18a
NA	Fam70a	9230110K08Rik	CD00297	NA	NA	Mrps23
NA	Fam81a	9230114K14Rik	CD00298	NA	NA	Mtor
NA	Fam82a1	9330118A15Rik	CD00299	NA	NA	Mtpn
NA	Fam82a2	9330121K16Rik	CD00301	NA	NA	Mtss1
NA	Fau	9330159F19Rik	CD00303	NA	NA	Myo5a
NA	Fbxl3	9330182L06Rik	CD00306	NA	NA	Nagk
NA	Fbxo21	9430038I01Rik	CD00310	NA	NA	Ncoa7
NA	Fgfr1op2	9530003O04Rik	CD00311	NA	NA	Ndufa5
NA	Fmnl1	9530009G21Rik	CD00313	NA	NA	Ndufab1
NA	Frmpd4	9530053H05Rik	CD00317	NA	NA	Ndufb2
NA	Frrs1l	9530056K15Rik	CD00319	NA	NA	Ndufb7
NA	Frs2	9630001P10Rik	CD00338	NA	NA	Ndufc1
NA	Gabbr2	9630015K15Rik	CD00342	NA	NA	Ndufs3
NA	Gad1	A230072C01Rik	CD00352	NA	NA	Ndufs8
NA	Gad2	A330050F15Rik	CD00356	NA	NA	Nefh
NA	Gal	A330094K24Rik	CD00363	NA	NA	Nell1
NA	Gal3st3	A730009L09Rik	CD00377	NA	NA	Nexn
NA	Gapdh	A730090H04Rik	CD00383	NA	NA	Nme2
NA	Garnl4	A830073O21Rik	CD00386	NA	NA	Nr2c2ap
NA	Gbas	A930005H10Rik	CD00395	NA	NA	Nr2f2
NA	Gbf1	A930036K24Rik	CD00396	NA	NA	Ntan1
NA	Gcap14	A930038B10Rik	CD00402	NA	NA	Ociad2
NA	Gcfc1	AA517650	CD00403	NA	NA	Opa3
NA	Gdf11	Aar2	CD00404	NA	NA	Pacsin2
NA	Gfm1	Aasdhppt	CD00426	NA	NA	Parp1
NA	Gga1	Abcb8	CD00440	NA	NA	Pcp2
NA	Gnai3	Abhd12	CD00463	NA	NA	Pcp4
NA	Gnao1	Abhd3	CD00465	NA	NA	Pcyox1
NA	Gng10	Abhd8	CD00486	NA	NA	Pde9a
NA	Gnl3	Abi3	CD00495	NA	NA	Pepd
NA	Gorasp1	Ablim1	CD00512	NA	NA	Phactr2
NA	Grb14	Acap3	CD00522	NA	NA	Pigt
NA	Grb2	Accs	CD00531	NA	NA	Pin1
NA	Gria3	Acn9	CD00536	NA	NA	Plekhd1
NA	Grin1	Actr3	CD00537	NA	NA	Plxdc1
NA	Grlf1	Acyp1	CD00543	NA	NA	Pogk
NA	Grm1	Acyp2	CD00547	NA	NA	Ppp1r16b
NA	Gucy1b3	Adam15	CD00552	NA	NA	Ppp1r17
NA	H2afy	Adamts4	CD00565	NA	NA	Ppp1r1b
NA	Habp4	Adprhl1	CD00570	NA	NA	Ppp2cb
NA	Hecw2	Aen	CD00572	NA	NA	Pqlc1
NA	Herc2	Afg3l2	CD00576	NA	NA	Prdx6
NA	Herc3	Afp	CD00582	NA	NA	Prkcg
NA	Hif1an	Agap3	CD00583	NA	NA	Prkg1
NA	Hist1h2bd	Ago3	CD00590	NA	NA	Prmt8
NA	Hist2h2aa3	Ahcyl2	CD00603	NA	NA	Psd2
NA	Hmox2	AI413582	CD00615	NA	NA	Ptprr
NA	Hnrpdl	AI447881	CD00618	NA	NA	Rab11fip4
NA	Hp1bp3	AI449595	CD00628	NA	NA	Rab1b
NA	Hpcal1	AI506816	CD00662	NA	NA	Racgap1
NA	Hsd17b14	AI593442	CD00664	NA	NA	Ran
NA	Hsp90b1	AI597468	CD00677	NA	NA	Rap1b
NA	Hspa12a	AI662270	CD00696	NA	NA	Rasgrp1
NA	Hspa4l	AI854517	CD00697	NA	NA	Rbfox2
NA	Hspa5	AI854703	CD00715	NA	NA	Rgs4
NA	Hspb6	Aif1l	CD00716	NA	NA	Rhoq
NA	Iars	Airn	CD00718	NA	NA	Rnasek
NA	Idh3a	Ajap1	CD00719	NA	NA	Rnf19b
NA	Idh3B	AK129341	CD00722	NA	NA	Rora
NA	Igf2r	Ak2	CD00729	NA	NA	Rps15
NA	Il22	Ak3	CD00732	NA	NA	Rps17
NA	Impg1	Ak5	CD00752	NA	NA	Rtn4
NA	Inpp5b	Akap13	CD00768	NA	NA	Samd8
NA	Ip6k2	Akirin1	CD00773	NA	NA	Sbk1
NA	Ipo7	Akr1b3	CD00788	NA	NA	Sccpdh
NA	Irf6	Akr7a5	CD00789	NA	NA	Scn4b
NA	Itfg1	Akt1s1	CD00790	NA	NA	Sec61a1
NA	Itm2b	Aktip	CD00796	NA	NA	2011-09-01
NA	Jakmip1	Aldh2	CD00807	NA	NA	2005-09-01
NA	Jkamp	Alg12	CD00811	NA	NA	Sepw1
NA	Jmjd8	Alkbh3	CD00824	NA	NA	Serf2
NA	Kcna1	Alkbh4	CD00842	NA	NA	Sestd1
NA	Kcnab2	Alkbh7	CD00845	NA	NA	Slc1a6
NA	Kcnc3	Alox5ap	CD00849	NA	NA	Slc20a1
NA	Kcnq2	Alpk2	CD00850	NA	NA	Snx24
NA	Kif1a	Amhr2	CD00862	NA	NA	Sod1
NA	Kifap3	Amz1	CD00866	NA	NA	Soga2
NA	Kitlg	Amz2	CD00875	NA	NA	Srp14
NA	Ksr2	Anapc10	CD00880	NA	NA	St8sia1
NA	Ldhb	Anapc11	CD00882	NA	NA	Steap2
NA	Lect1	Anapc13	CD00883	NA	NA	Stk17b
NA	Leprotl1	Anapc15	CD00889	NA	NA	Stmn3
NA	Lgr5	Anapc16	CD00892	NA	NA	Stmn4
NA	Lig3	Ang2	CD00899	NA	NA	Strn3
NA	Lman2	Angpt2	CD00905	NA	NA	Tceb2
NA	Lmtk2	Ankib1	CD00907	NA	NA	Tgfb2
NA	LOC100359544	Ankrd12	CD00908	NA	NA	Thy1
NA	LOC100364190	Ankrd24	CD00923	NA	NA	Timm13
NA	LOC100365768	Ankrd29	CD00944	NA	NA	Tmeff2
NA	LOC100366152	Ankrd33b	CD00948	NA	NA	Tmem14a
NA	LOC304725	Ankrd42	CD00973	NA	NA	Tmem184b
NA	LOC501396	Ankrd45	CD00985	NA	NA	Tnfrsf21
NA	Lrp11	Ano4	CD00988	NA	NA	Tnip1
NA	Lrp8	Anxa11	CD00997	NA	NA	Tomm6
NA	Lrpap1	Anxa7	CD00999	NA	NA	Trim9
NA	Lrrc28	Aoah	CD01019	NA	NA	Trmt10a
NA	Lrrc40	Ap1s1	CD01023	NA	NA	Trpc3
NA	Luzp1	Ap2s1	CD01025	NA	NA	Tstd3
NA	Madd	Ap5s1	CD01027	NA	NA	Ttll5
NA	Man1b1	Apip	CD01032	NA	NA	Tubb3
NA	Map1a	Apitd1	CD01046	NA	NA	Uhmk1
NA	Map1b	Apol6	CD01049	NA	NA	Uqcrq
NA	Map3k14	Apol8	CD01051	NA	NA	Urm1
NA	Mapk10	Apoo	CD01059	NA	NA	Vamp2
NA	Mapk1ip1l	Apool	CD01076	NA	NA	Vimp
NA	Mapk8	Appl1	CD01081	NA	NA	Wiz
NA	Mapk9	Aptx	CD01087	NA	NA	Wls
NA	Mapt	Araf	CD01104	NA	NA	Wwc2
NA	2007-03-01	Arf6	CD01126	NA	NA	Yaf2
NA	Mast1	Arfgap2	CD01132	NA	NA	Ykt6
NA	Mast4	Arhgap1	CD01133	NA	NA	Ywhaq
NA	Mcf2l	Arhgap15	CD01139	NA	NA	Zdhhc5
NA	Mdh1	Arhgap20	CD01145	NA	NA	Znhit1
NA	Mdh2	Arhgap27	CD01146	NA	NA	NA
NA	Morn4	Arhgap6	CD01153	NA	NA	NA
NA	MP68	Arhgap9	CD01157	NA	NA	NA
NA	Mras	Arhgef18	CD01163	NA	NA	NA
NA	Mrp63	Arl1	CD01166	NA	NA	NA
NA	Mrpl17	Arl2	CD01171	NA	NA	NA
NA	Mrps28	Arl4a	CD01174	NA	NA	NA
NA	Mul1	Arl5b	CD01186	NA	NA	NA
NA	Myh10	Armc7	CD01187	NA	NA	NA
NA	Myo10	Armc8	CD01190	NA	NA	NA
NA	Myom1	Armcx2	CD01199	NA	NA	NA
NA	Naa25	Arnt2	CD01210	NA	NA	NA
NA	Nabp1	Arrdc1	CD01211	NA	NA	NA
NA	Ncdn	Arrdc4	CD01219	NA	NA	NA
NA	Ndrg4	Arsg	CD01233	NA	NA	NA
NA	Ndufa13	Art3	CD01234	NA	NA	NA
NA	Ndufaf3	Asb1	CD01237	NA	NA	NA
NA	Ndufb10	Asb11	CD01238	NA	NA	NA
NA	Ndufb5	Asb13	CD01243	NA	NA	NA
NA	Ndufs2	Asb4	CD01244	NA	NA	NA
NA	Nedd9	Asb6	CD01249	NA	NA	NA
NA	Nefl	Asna1	CD01262	NA	NA	NA
NA	Nefm	Aspscr1	CD01271	NA	NA	NA
NA	Nfe2l1	Atf4	CD01280	NA	NA	NA
NA	Nhp2l1	Atg10	CD01293	NA	NA	NA
NA	Nkx3-1	Atg12	CD01295	NA	NA	NA
NA	Nlgn2	Atg2b	CD01298	NA	NA	NA
NA	Nlgn3	Atg4a	CD01302	NA	NA	NA
NA	Nme4	Atg4a-ps	CD01306	NA	NA	NA
NA	Noc4l	Atg4c	CD01310	NA	NA	NA
NA	Nomo1	Atp5e	CD01311	NA	NA	NA
NA	Nop2	Atp5h	CD01318	NA	NA	NA
NA	Nptn	Atp5j2	CD01326	NA	NA	NA
NA	Nrd1	Atp5l	CD01331	NA	NA	NA
NA	Nrp2	Atp5s	CD01346	NA	NA	NA
NA	Nucb1	Atp6v1f	CD01354	NA	NA	NA
NA	Nufip2	Atp6v1g1	CD01355	NA	NA	NA
NA	Nup35	Atp6v1g2	CD01356	NA	NA	NA
NA	Ogdhl	Atp7b	CD01365	NA	NA	NA
NA	Osbp2	Atpaf2	CD01366	NA	NA	NA
NA	Paf1	Atpif1	CD01374	NA	NA	NA
NA	Paip2b	Atrx	CD01378	NA	NA	NA
NA	Pc	AU022526	CD01382	NA	NA	NA
NA	Pcdha@	AU040320	CD01384	NA	NA	NA
NA	pcdhg@	Auh	CD01393	NA	NA	NA
NA	Pcdhga12	Avl9	CD01396	NA	NA	NA
NA	Pcyt2	AW046457	CD01413	NA	NA	NA
NA	Pdcd6	B230118H07Rik	CD01421	NA	NA	NA
NA	Pde2a	B230216G23Rik	CD01436	NA	NA	NA
NA	Pde5a	B230217C12Rik	CD01439	NA	NA	NA
NA	Pdha1	B230217O12Rik	CD01442	NA	NA	NA
NA	Pdhb	B3galnt2	CD01454	NA	NA	NA
NA	Pdhx	B3galt2	CD01461	NA	NA	NA
NA	Pdia3	B3galt5	CD01477	NA	NA	NA
NA	Pdlim7	B3gnt1	CD01480	NA	NA	NA
NA	Pdp2	B3gnt2	CD01484	NA	NA	NA
NA	Pebp1	B4galnt1	CD01486	NA	NA	NA
NA	Peg3	B4galnt2	CD01493	NA	NA	NA
NA	Pex5	B4galt7	CD01502	NA	NA	NA
NA	Pfn1	B930054O08	CD01523	NA	NA	NA
NA	Pfn2	Bag1	CD01541	NA	NA	NA
NA	Phka2	Baiap2	CD01553	NA	NA	NA
NA	Pianp	Banf1	CD01559	NA	NA	NA
NA	Pigy	Banp	CD01562	NA	NA	NA
NA	Pip5k1c	Bbip1	CD01567	NA	NA	NA
NA	Plcd4	Bbs4	CD01578	NA	NA	NA
NA	Plcxd2	BC003331	CD01580	NA	NA	NA
NA	Pld3	BC004004	CD01584	NA	NA	NA
NA	Plekha6	BC010981	CD01588	NA	NA	NA
NA	Pmpca	BC022687	CD01595	NA	NA	NA
NA	Pmpcb	BC022713	CD01602	NA	NA	NA
NA	Poldip2	BC048403	CD01612	NA	NA	NA
NA	Poll	BC048546	CD01614	NA	NA	NA
NA	Ppp1r9b	BC052040	CD01623	NA	NA	NA
NA	Ppp2r5d	BC056474	CD01626	NA	NA	NA
NA	Prdx3	Bcas2	CD01638	NA	NA	NA
NA	Prpf19	Bckdk	CD01640	NA	NA	NA
NA	Prrc2a	Bcl11b	CD01644	NA	NA	NA
NA	Prrc2c	Bcl2l1	CD01660	NA	NA	NA
NA	Psmd7	Bcl2l12	CD01666	NA	NA	NA
NA	Psmd8	Bcl7a	CD01679	NA	NA	NA
NA	Ptchd4	Bdh1	CD01682	NA	NA	NA
NA	Ptpn1	Bean1	CD01685	NA	NA	NA
NA	Pura	Becn1	CD01692	NA	NA	NA
NA	Pus7	Bend4	CD01693	NA	NA	NA
NA	Pvrl1	Bet1	CD01699	NA	NA	NA
NA	Rab11fip1	Birc2	CD01703	NA	NA	NA
NA	Rab11fip3	Birc3	CD01709	NA	NA	NA
NA	Rab31	Bloc1s2a	CD01711	NA	NA	NA
NA	Rab3a	Bloc1s4	CD01734	NA	NA	NA
NA	Rab43	Bloc1s6	CD01743	NA	NA	NA
NA	Rabl6	Bnip2	CD01751	NA	NA	NA
NA	Rad23b	Bola2	CD01761	NA	NA	NA
NA	Rap1gap	Boll	CD01769	NA	NA	NA
NA	Rap1gap2	Bphl	CD01770	NA	NA	NA
NA	Rasd1	Bspry	CD01773	NA	NA	NA
NA	Rbbp4	Btbd10	CD01777	NA	NA	NA
NA	RGD1303003	Btbd19	CD01782	NA	NA	NA
NA	RGD1305235	Bub1	CD01788	NA	NA	NA
NA	RGD1305627	Bysl	CD01809	NA	NA	NA
NA	RGD1306954	C030006K11Rik	CD01819	NA	NA	NA
NA	RGD1307595	C030011L09Rik	CD01820	NA	NA	NA
NA	RGD1307752	C030027H14Rik	CD01824	NA	NA	NA
NA	RGD1310110	C1d	CD01847	NA	NA	NA
NA	RGD1310352	C330006A16Rik	CD01850	NA	NA	NA
NA	RGD1310686	C330018D20Rik	CD01875	NA	NA	NA
NA	RGD1311310	C79743	CD01876	NA	NA	NA
NA	RGD1311739	Caap1	CD01884	NA	NA	NA
NA	RGD1559441	Cacnb1	CD01885	NA	NA	NA
NA	RGD1560224	Cacng2	CD01888	NA	NA	NA
NA	RGD1562469	Cacul1	CD01892	NA	NA	NA
NA	RGD1562533	Calm5	CD01896	NA	NA	NA
NA	RGD1562618	Capg	CD01902	NA	NA	NA
NA	RGD1563556	Capn10	CD01922	NA	NA	NA
NA	RGD1563583	Capn3	CD01923	NA	NA	NA
NA	RGD1564093	Carf	CD01936	NA	NA	NA
NA	RGD1565784	Casp6	CD01938	NA	NA	NA
NA	RGD1566380	Casp9	CD01943	NA	NA	NA
NA	Rnf214	Casq1	CD01968	NA	NA	NA
NA	Rnf40	Cbx1	CD01977	NA	NA	NA
NA	Rogdi	Cbx8	CD01979	NA	NA	NA
NA	Romo1	Cby1	CD01986	NA	NA	NA
NA	Rpl14	Ccbl2	CD01990	NA	NA	NA
NA	Rpl36	Ccdc101	CD01993	NA	NA	NA
NA	Rpl6	Ccdc106	CD01995	NA	NA	NA
NA	Rrp8	Ccdc130	CD02011	NA	NA	NA
NA	Ryr1	Ccdc138	CD02022	NA	NA	NA
NA	Sarm1	Ccdc146	CD02025	NA	NA	NA
NA	Scaf1	Ccdc159	CD02035	NA	NA	NA
NA	Scg2	Ccdc167	CD02036	NA	NA	NA
NA	Scn1a	Ccdc28a	CD02041	NA	NA	NA
NA	Scn1b	Ccdc38	CD02062	NA	NA	NA
NA	Scn4a	Ccdc39	CD02064	NA	NA	NA
NA	Sdhb	Ccdc41	CD02080	NA	NA	NA
NA	Sec14l1	Ccdc53	CD02082	NA	NA	NA
NA	Sema4g	Ccdc66	CD02128	NA	NA	NA
NA	Setd5	Ccdc69	CD02133	NA	NA	NA
NA	Setd7	Ccdc71	CD02135	NA	NA	NA
NA	Sez6l	Ccdc71l	CD02152	NA	NA	NA
NA	Sf3a1	Ccdc90b	CD02168	NA	NA	NA
NA	Sfswap	Ccdc91	CD02169	NA	NA	NA
NA	Sfxn1	Ccdc92	CD02173	NA	NA	NA
NA	Sgpp2	Cck	CD02177	NA	NA	NA
NA	Shank1	Ccl25	CD02180	NA	NA	NA
NA	Shank2	Ccm2	CD02183	NA	NA	NA
NA	Shisa6	Ccnc	CD02191	NA	NA	NA
NA	Skor2-ps1	Cd151	Cd200	NA	NA	NA
NA	Sla	Cd200r4	Cd2ap	NA	NA	NA
NA	Slbp	Cd28	Cd80	NA	NA	NA
NA	Slc12a5	Cd2bp2	Cd84	NA	NA	NA
NA	Slc25a4	Cd59a	Cdc16	NA	NA	NA
NA	Slc4a10	Cd8a	Cdc23	NA	NA	NA
NA	Slc6a6	Cd99	Cdc42	NA	NA	NA
NA	Slc9a8	Cdc20	Cdh13	NA	NA	NA
NA	Smg7	Cdc26	Cdh2	NA	NA	NA
NA	Snap29	Cdc42se2	Cdh20	NA	NA	NA
NA	Snapap	Cdip1	Cdh8	NA	NA	NA
NA	Snapc2	Cdk13	Cdk4	NA	NA	NA
NA	Snx10	Cdk5	Cdyl	NA	NA	NA
NA	Snx13	Cdk5r2	Celf2	NA	NA	NA
NA	Sod2	Cdkl1	Celf4	NA	NA	NA
NA	Sort1	Cdo1	Cenpv	NA	NA	NA
NA	Sox5l1	Cdpf1	Cep110	NA	NA	NA
NA	Spock2	Cenpa	Cep170	NA	NA	NA
NA	Sptan1	Cenpw	Cep350	NA	NA	NA
NA	Sptbn2	Cep19	Cfdp1	NA	NA	NA
NA	Sqle	Cep68	Chd7	NA	NA	NA
NA	Srpk1	Cfl1	Ciz1	NA	NA	NA
NA	Srpr	Cggbp1	Ckmt1	NA	NA	NA
NA	Srsf12	Cgrrf1	Clic4	NA	NA	NA
NA	Stat3	Chchd1	Clip1	NA	NA	NA
NA	Stc2	Chchd10	Clk4	NA	NA	NA
NA	Stim1	Chchd3	Clns1a	NA	NA	NA
NA	Stim2	Chchd5	Cltb	NA	NA	NA
NA	Stoml2	Chchd6	Clybl	NA	NA	NA
NA	Sucla2	Chek2	Cnbp	NA	NA	NA
NA	Sumo3	Chid1	Cnih	NA	NA	NA
NA	Sv2c	Chmp2b	Cnn3	NA	NA	NA
NA	Synm	Chmp5	Cntd1	NA	NA	NA
NA	Syt7	Chodl	Cntln	NA	NA	NA
NA	Tacc1	Chp1	Cntnap2	NA	NA	NA
NA	Taco1	Chrac1	Cntnap4	NA	NA	NA
NA	Tamm41	Chrdl1	Cog8	NA	NA	NA
NA	Tbc1d9	Chst2	Col4a3bp	NA	NA	NA
NA	Tbc1d9b	Chst3	Colec12	NA	NA	NA
NA	Tecpr1	Chst8	Copa	NA	NA	NA
NA	Thsd7a	Chtf18	Copg	NA	NA	NA
NA	Thumpd1	Churc1	Cops4	NA	NA	NA
NA	Timm21	Cib1	Cpeb3	NA	NA	NA
NA	Timm23	Cilp2	Cpeb4	NA	NA	NA
NA	Tmem59l	Cinp	Creg2	NA	NA	NA
NA	Tmem9b	Cks1b	Crim1	NA	NA	NA
NA	Tnpo2	Clasp2	Cript	NA	NA	NA
NA	Tpm3	Cldn22	Crybg3	NA	NA	NA
NA	Trabd2b	Cldn25	Csda	NA	NA	NA
NA	Trafd1	Cldn3	Csde1	NA	NA	NA
NA	Trak2	Clec2l	Csmd1	NA	NA	NA
NA	Trappc11	Clip4	Csrp2	NA	NA	NA
NA	Trim35	Cln8	Ctif	NA	NA	NA
NA	Trove2	Clpp	Ctnna2	NA	NA	NA
NA	Tsen34	Clvs1	Ctsz	NA	NA	NA
NA	Ttll7	Cmc1	Cul3	NA	NA	NA
NA	Tubb4b	Cmc2	Cux1	NA	NA	NA
NA	Tubg2	Cmpk2	Cybrd1	NA	NA	NA
NA	Txn2	Cmss1	D17Wsu92e	NA	NA	NA
NA	Txnl4a	Cnot7	D18Ertd653e	NA	NA	NA
NA	Uba2	Cntn3	D4Wsu53e	NA	NA	NA
NA	Uba52	Coa5	Dbc1	NA	NA	NA
NA	Ubc	Coch	Dcbld2	NA	NA	NA
NA	Ube2m	Cog4	Ddost	NA	NA	NA
NA	Ubr5	Commd1	Dgke	NA	NA	NA
NA	Uchl1	Commd10	Dhx16	NA	NA	NA
NA	Upf3a	Commd3	Dhx36	NA	NA	NA
NA	Uqcr11	Commd6	Dhx57	NA	NA	NA
NA	Uqcrc1	Commd8	Dhx9	NA	NA	NA
NA	Usp24	Commd9	Diap3	NA	NA	NA
NA	Usp46	Coprs	Dicer1	NA	NA	NA
NA	Utp3	Cops7a	Dio2	NA	NA	NA
NA	Vdac1	Corin	Dld	NA	NA	NA
NA	Vegfa	Cox14	Dlg3	NA	NA	NA
NA	Vps4a	Cox15	Dmap1	NA	NA	NA
NA	Vtcn1	Cox16	Dmbx1	NA	NA	NA
NA	Vti1B	Cox17	Dnajc18	NA	NA	NA
NA	Wdr43	Cox19	Dock1	NA	NA	NA
NA	Wnk2	Cox6c	Dpp6	NA	NA	NA
NA	Ywhag	Cox7a1	Dse	NA	NA	NA
NA	Ywhah	Cpeb1	Dstyk	NA	NA	NA
NA	Ywhaz	Cpne9	Dtna	NA	NA	NA
NA	Zfp13	Cpped1	Dus2l	NA	NA	NA
NA	Zfp364	Cpsf2	Dusp16	NA	NA	NA
NA	Zfp385a	Creb1	Dusp5	NA	NA	NA
NA	Zfp385b	Creb3l1	Dync1i2	NA	NA	NA
NA	Zfp385c	Creb3l3	Dzip1	NA	NA	NA
NA	Zfp462	Creg1	Dzip3	NA	NA	NA
NA	Znfx1	Crem	E130309F12Rik	NA	NA	NA
NA	NA	Crispld2	E2f3	NA	NA	NA
NA	NA	Cryba4	E2f7	NA	NA	NA
NA	NA	Crygs	Edf1	NA	NA	NA
NA	NA	Cryl1	Eef1a1	NA	NA	NA
NA	NA	Csad	Eef1b2	NA	NA	NA
NA	NA	Csf1	Efhd1	NA	NA	NA
NA	NA	Csf2ra	Egln1	NA	NA	NA
NA	NA	Ctc1	Ehbp1	NA	NA	NA
NA	NA	Ctsb	Eif2s3x	NA	NA	NA
NA	NA	Cuta	Eif3f	NA	NA	NA
NA	NA	Cxcl1	Eif3l	NA	NA	NA
NA	NA	Cyb561d2	Eif4a1	NA	NA	NA
NA	NA	Cybb	Eif4g2	NA	NA	NA
NA	NA	Cycs	Eml5	NA	NA	NA
NA	NA	Cyct	Eml6	NA	NA	NA
NA	NA	Cyp27a1	Enc1	NA	NA	NA
NA	NA	Cystm1	Enox1	NA	NA	NA
NA	NA	D130020L05Rik	Ep300	NA	NA	NA
NA	NA	D13Ertd787e	Epb4.1	NA	NA	NA
NA	NA	D16Ertd472e	Epb4.1l3	NA	NA	NA
NA	NA	D19Ertd737e	Epb4.1l4b	NA	NA	NA
NA	NA	D3Bwg0562e	Ephb1	NA	NA	NA
NA	NA	D3Ertd751e	Ephx1	NA	NA	NA
NA	NA	D8Ertd738e	Ergic3	NA	NA	NA
NA	NA	Dab1	Erh	NA	NA	NA
NA	NA	Dars2	Evi5	NA	NA	NA
NA	NA	Dbh	Ewsr1	NA	NA	NA
NA	NA	Dcaf12	Ezh1	NA	NA	NA
NA	NA	Dcaf4	Fads1	NA	NA	NA
NA	NA	Dcaf6	Faf1	NA	NA	NA
NA	NA	Dck	Fam133b	NA	NA	NA
NA	NA	Dct	Fam135b	NA	NA	NA
NA	NA	Dctd	Fam13c	NA	NA	NA
NA	NA	Dctn3	Fam20c	NA	NA	NA
NA	NA	Dctn6	Fam63b	NA	NA	NA
NA	NA	Dda1	Fam73a	NA	NA	NA
NA	NA	Ddit3	Fam73b	NA	NA	NA
NA	NA	Ddn	Fam96b	NA	NA	NA
NA	NA	Ddr1	Fbxo31	NA	NA	NA
NA	NA	Ddx19b	Fbxo41	NA	NA	NA
NA	NA	Ddx25	Fbxw7	NA	NA	NA
NA	NA	Ddx54	Fdft1	NA	NA	NA
NA	NA	Ddx59	Fgf12	NA	NA	NA
NA	NA	Deb1	Fgf13	NA	NA	NA
NA	NA	Decr2	Fndc5	NA	NA	NA
NA	NA	Dennd2a	Frmd4a	NA	NA	NA
NA	NA	Dennd2d	Fscn1	NA	NA	NA
NA	NA	Dennd6a	Fstl4	NA	NA	NA
NA	NA	Denr	Ftsj3	NA	NA	NA
NA	NA	Derl3	Fuca1	NA	NA	NA
NA	NA	Dexi	Fus	NA	NA	NA
NA	NA	Dgcr2	Fut9	NA	NA	NA
NA	NA	Dgcr6	Fxr1	NA	NA	NA
NA	NA	Dgkb	G6pc3	NA	NA	NA
NA	NA	Dhps	Gabarap	NA	NA	NA
NA	NA	Dhx58	Gabpa	NA	NA	NA
NA	NA	Dip2a	Gabra1	NA	NA	NA
NA	NA	Dll4	Gabrb1	NA	NA	NA
NA	NA	Dlx4	Galnt13	NA	NA	NA
NA	NA	Dmrtc1a	Galnt9	NA	NA	NA
NA	NA	Dnajb4	Galntl4	NA	NA	NA
NA	NA	Dnajc15	Gars	NA	NA	NA
NA	NA	Dnajc2	Gatc	NA	NA	NA
NA	NA	Dnajc21	Gcnt2	NA	NA	NA
NA	NA	Dnajc5	Gdap10	NA	NA	NA
NA	NA	Dnajc8	Gkap1	NA	NA	NA
NA	NA	Dnalc4	Glg1	NA	NA	NA
NA	NA	Dnase2a	Gli3	NA	NA	NA
NA	NA	Dnlz	Glt1d1	NA	NA	NA
NA	NA	Dnpep	Glt8d1	NA	NA	NA
NA	NA	Dnph1	Glyr1	NA	NA	NA
NA	NA	Dpm2	Gm15800	NA	NA	NA
NA	NA	Dppa2	Gm16515	NA	NA	NA
NA	NA	Dpy19l3	Gnai1	NA	NA	NA
NA	NA	Dpy30	Gnb1	NA	NA	NA
NA	NA	Drap1	Gng12	NA	NA	NA
NA	NA	Drg2	Gng3	NA	NA	NA
NA	NA	Dtd2	Gng5	NA	NA	NA
NA	NA	Dtx3l	Gpm6b	NA	NA	NA
NA	NA	Dtymk	Gpr158	NA	NA	NA
NA	NA	Dusp10	Gpr22	NA	NA	NA
NA	NA	Dusp12	Gria2	NA	NA	NA
NA	NA	Dusp15	Gria4	NA	NA	NA
NA	NA	Dusp19	Grik2	NA	NA	NA
NA	NA	Dusp28	Grik4	NA	NA	NA
NA	NA	Dusp3	Grm3	NA	NA	NA
NA	NA	Dusp8	Grpel1	NA	NA	NA
NA	NA	Duxbl1	Gss	NA	NA	NA
NA	NA	Dynll2	Gtf3c1	NA	NA	NA
NA	NA	Dynlrb1	H19	NA	NA	NA
NA	NA	Dynlt3	H2-Ke2	NA	NA	NA
NA	NA	Dyrk3	Hbb	NA	NA	NA
NA	NA	E130114P18Rik	Hcn1	NA	NA	NA
NA	NA	E2f5	Hdgf	NA	NA	NA
NA	NA	E2f6	Hectd1	NA	NA	NA
NA	NA	Eaf2	Hibch	NA	NA	NA
NA	NA	Ear11	Hint1	NA	NA	NA
NA	NA	Ebf2	Hipk3	NA	NA	NA
NA	NA	Ebf4	Hivep2	NA	NA	NA
NA	NA	Ebi3	Hivep3	NA	NA	NA
NA	NA	Ebna1bp2	Hmgcs1	NA	NA	NA
NA	NA	Ecd	Hmgn3	NA	NA	NA
NA	NA	Ecm1	Hnrnpa0	NA	NA	NA
NA	NA	Edil3	Hnrnpa1	NA	NA	NA
NA	NA	Efcab1	Hnrnpf	NA	NA	NA
NA	NA	Efna3	Hnrnph1	NA	NA	NA
NA	NA	Efna5	Hs2st1	NA	NA	NA
NA	NA	Efr3a	Hspa8	NA	NA	NA
NA	NA	Egfl7	Huwe1	NA	NA	NA
NA	NA	Egln2	Iars2	NA	NA	NA
NA	NA	Ehd2	Igsf3	NA	NA	NA
NA	NA	Ehd3	Il16	NA	NA	NA
NA	NA	Eif1ax	Il1rapl1	NA	NA	NA
NA	NA	Eif2s3y	Ildr2	NA	NA	NA
NA	NA	Eif3i	Impad1	NA	NA	NA
NA	NA	Eif5	Ina	NA	NA	NA
NA	NA	Eif5a	Ints6	NA	NA	NA
NA	NA	Ell2	Itga6	NA	NA	NA
NA	NA	Emc4	Itsn2	NA	NA	NA
NA	NA	Emc6	Jagn1	NA	NA	NA
NA	NA	Emc7	Jak2	NA	NA	NA
NA	NA	Eno4	Jam2	NA	NA	NA
NA	NA	Entpd2	Jam3	NA	NA	NA
NA	NA	Entpd5	Jmjd1c	NA	NA	NA
NA	NA	Eny2	Jph4	NA	NA	NA
NA	NA	Epb4.1l2	Kcmf1	NA	NA	NA
NA	NA	Epha4	Kcnb2	NA	NA	NA
NA	NA	Epha7	Kcnd3	NA	NA	NA
NA	NA	Epn1	Kcnj3	NA	NA	NA
NA	NA	Epor	Kcnj9	NA	NA	NA
NA	NA	Ercc1	Kcnq1	NA	NA	NA
NA	NA	Erf	Kctd10	NA	NA	NA
NA	NA	Erlec1	Kdm1a	NA	NA	NA
NA	NA	Ermap	Kdm4a	NA	NA	NA
NA	NA	Esrra	Kif4	NA	NA	NA
NA	NA	Esrrb	Kirrel3	NA	NA	NA
NA	NA	Etf1	Klf9	NA	NA	NA
NA	NA	Etl4	Klhl20	NA	NA	NA
NA	NA	Etnk1	Klhl9	NA	NA	NA
NA	NA	Etohi1	Klraq1	NA	NA	NA
NA	NA	Exosc5	Kpna3	NA	NA	NA
NA	NA	Exosc6	Kremen1	NA	NA	NA
NA	NA	Exosc7	Lama2	NA	NA	NA
NA	NA	F11r	Lamtor3	NA	NA	NA
NA	NA	F8a	Lancl2	NA	NA	NA
NA	NA	Fabp4	Lars	NA	NA	NA
NA	NA	Fabp5	Lars2	NA	NA	NA
NA	NA	Fam108a	Letm2	NA	NA	NA
NA	NA	Fam117a	Limk1	NA	NA	NA
NA	NA	Fam118b	Lims1	NA	NA	NA
NA	NA	Fam136a	Lin7a	NA	NA	NA
NA	NA	Fam151b	Llgl1	NA	NA	NA
NA	NA	Fam154b	Lpin1	NA	NA	NA
NA	NA	Fam155a	Lpp	NA	NA	NA
NA	NA	Fam160a1	Lrp1b	NA	NA	NA
NA	NA	Fam160b1	Lrrc7	NA	NA	NA
NA	NA	Fam161a	Lrrtm3	NA	NA	NA
NA	NA	Fam162a	Lysmd1	NA	NA	NA
NA	NA	Fam173b	Lzts1	NA	NA	NA
NA	NA	Fam174a	Macf1	NA	NA	NA
NA	NA	Fam175b	Mad2l1bp	NA	NA	NA
NA	NA	Fam185a	Malat1	NA	NA	NA
NA	NA	Fam195a	Mapk4	NA	NA	NA
NA	NA	Fam198b	Mapre1	NA	NA	NA
NA	NA	Fam19a3	Marcks	NA	NA	NA
NA	NA	Fam21	Mast2	NA	NA	NA
NA	NA	Fam210b	Mat2a	NA	NA	NA
NA	NA	Fam217b	Mau2	NA	NA	NA
NA	NA	Fam220a	Mbd6	NA	NA	NA
NA	NA	Fam229b	Mbnl2	NA	NA	NA
NA	NA	Fam45a	Mctp1	NA	NA	NA
NA	NA	Fam65b	Mecom	NA	NA	NA
NA	NA	Fam69b	Mecp2	NA	NA	NA
NA	NA	Fam71d	Med10	NA	NA	NA
NA	NA	Fam71e1	Med13	NA	NA	NA
NA	NA	Fam78a	Megf11	NA	NA	NA
NA	NA	Fam78b	Meis1	NA	NA	NA
NA	NA	Fam83d	Meis2	NA	NA	NA
NA	NA	Fam92a	Mesdc2	NA	NA	NA
NA	NA	Fam96a	Mettl6	NA	NA	NA
NA	NA	Fancb	Mga	NA	NA	NA
NA	NA	Fance	Mgat5	NA	NA	NA
NA	NA	Fap	Mical3	NA	NA	NA
NA	NA	Fars2	Mid1	NA	NA	NA
NA	NA	Fastkd2	Mier1	NA	NA	NA
NA	NA	Fbxl21	Minpp1	NA	NA	NA
NA	NA	Fbxo17	Mki67	NA	NA	NA
NA	NA	Fbxo18	Mll5	NA	NA	NA
NA	NA	Fbxo22	Mmaa	NA	NA	NA
NA	NA	Fbxo27	Mmd2	NA	NA	NA
NA	NA	Fbxo33	Mnat1	NA	NA	NA
NA	NA	Fbxo36	Mocs2	NA	NA	NA
NA	NA	Fbxo42	Mon2	NA	NA	NA
NA	NA	Fbxw2	Morf4l1	NA	NA	NA
NA	NA	Fbxw5	Mpdz	NA	NA	NA
NA	NA	Fcor	Mppe1	NA	NA	NA
NA	NA	Fen1	Mrfap1	NA	NA	NA
NA	NA	Fgd1	Mrpl30	NA	NA	NA
NA	NA	Fgf7	Msra	NA	NA	NA
NA	NA	Fggy	Mtap1b	NA	NA	NA
NA	NA	Fhit	Mtap2	NA	NA	NA
NA	NA	Fibp	Mtap4	NA	NA	NA
NA	NA	Fign	Mtmr6	NA	NA	NA
NA	NA	Fkbp1a	Mtus2	NA	NA	NA
NA	NA	Flywch2	Mycn	NA	NA	NA
NA	NA	Fmo2	Myef2	NA	NA	NA
NA	NA	Fmr1	Myt1	NA	NA	NA
NA	NA	Fndc4	N4bp2l2	NA	NA	NA
NA	NA	Foxk2	Naa15	NA	NA	NA
NA	NA	Foxl2	Nap1l1	NA	NA	NA
NA	NA	Foxp2	Nap1l3	NA	NA	NA
NA	NA	Foxq1	Nap1l5	NA	NA	NA
NA	NA	Foxs1	Napb	NA	NA	NA
NA	NA	Ftl1	Ncam1	NA	NA	NA
NA	NA	Fut4-ps1	Ncam2	NA	NA	NA
NA	NA	Fxn	Nckap5	NA	NA	NA
NA	NA	Fxyd7	Ncoa1	NA	NA	NA
NA	NA	Galk2	Ndfip1	NA	NA	NA
NA	NA	Galnt10	Ndn	NA	NA	NA
NA	NA	Gas7	Ndst3	NA	NA	NA
NA	NA	Gatad1	Ndufv2	NA	NA	NA
NA	NA	Gatsl2	Nedd4	NA	NA	NA
NA	NA	Gchfr	Nedd4l	NA	NA	NA
NA	NA	Gclc	Nek1	NA	NA	NA
NA	NA	Gdi2	Nell2	NA	NA	NA
NA	NA	Gfer	Neto1	NA	NA	NA
NA	NA	Gfm2	Nfasc	NA	NA	NA
NA	NA	Gfod1	Nfib	NA	NA	NA
NA	NA	Gfra2	Nfkb1	NA	NA	NA
NA	NA	Gfra4	Nkx6-2	NA	NA	NA
NA	NA	Ggct	Nlgn1	NA	NA	NA
NA	NA	Ggnbp1	Nme1	NA	NA	NA
NA	NA	Ggps1	Nmnat1	NA	NA	NA
NA	NA	Ghr	Nono	NA	NA	NA
NA	NA	Ghrl	Npas3	NA	NA	NA
NA	NA	Gid4	Npc2	NA	NA	NA
NA	NA	Gins1	Npepps	NA	NA	NA
NA	NA	Gipc2	Nploc4	NA	NA	NA
NA	NA	Glb1	Npm1	NA	NA	NA
NA	NA	Glcci1	Nras	NA	NA	NA
NA	NA	Glce	Nrcam	NA	NA	NA
NA	NA	Gle1	Nrxn2	NA	NA	NA
NA	NA	Glo1	Nrxn3	NA	NA	NA
NA	NA	Glrx	Nsf	NA	NA	NA
NA	NA	Glrx2	Nsun2	NA	NA	NA
NA	NA	Glt28d2	Ntrk2	NA	NA	NA
NA	NA	Gm13205	Nudcd3	NA	NA	NA
NA	NA	Gm382	Numb	NA	NA	NA
NA	NA	Gm4814	Nupl1	NA	NA	NA
NA	NA	Gm5083	Odz1	NA	NA	NA
NA	NA	Gm6710	Odz2	NA	NA	NA
NA	NA	Gmds	Ogfrl1	NA	NA	NA
NA	NA	Gmfb	Ogt	NA	NA	NA
NA	NA	Gmnn	Olfm3	NA	NA	NA
NA	NA	Gnaq	Olfr297	NA	NA	NA
NA	NA	Gng4	Optn	NA	NA	NA
NA	NA	Gnpnat1	Os9	NA	NA	NA
NA	NA	Golph3	Osbpl9	NA	NA	NA
NA	NA	Gp1bb	Osgep	NA	NA	NA
NA	NA	Gpaa1	Oxr1	NA	NA	NA
NA	NA	Gpld1	Pa2g4	NA	NA	NA
NA	NA	Gpr12	Pabpc1	NA	NA	NA
NA	NA	Gpr137b	Paip2	NA	NA	NA
NA	NA	Gpr176	Pak1	NA	NA	NA
NA	NA	Gpt2	Papd4	NA	NA	NA
NA	NA	Gpx1	Papss1	NA	NA	NA
NA	NA	Gpx7	Park7	NA	NA	NA
NA	NA	Grk6	Paxip1	NA	NA	NA
NA	NA	Grm7	Pbx1	NA	NA	NA
NA	NA	Grn	Pcbp1	NA	NA	NA
NA	NA	Grsf1	Pcca	NA	NA	NA
NA	NA	Grtp1	Pcdh7	NA	NA	NA
NA	NA	Gskip	Pcdhga1	NA	NA	NA
NA	NA	Gstm7	Pcgf3	NA	NA	NA
NA	NA	Gstz1	Pcmt1	NA	NA	NA
NA	NA	Gtdc1	Pcsk2	NA	NA	NA
NA	NA	Gtf2a2	Pcsk7	NA	NA	NA
NA	NA	Gtf2h4	Pcyt1a	NA	NA	NA
NA	NA	Gtf3c6	Pdcd5	NA	NA	NA
NA	NA	Gtpbp3	Pde10a	NA	NA	NA
NA	NA	Gtpbp4	Pde1b	NA	NA	NA
NA	NA	Gtsf1	Pde1c	NA	NA	NA
NA	NA	Gyg	Pde4b	NA	NA	NA
NA	NA	Gyk	Pde7a	NA	NA	NA
NA	NA	H2-Ab1	Pdpk1	NA	NA	NA
NA	NA	H2afj	Pdpr	NA	NA	NA
NA	NA	H2afz	Pdxp	NA	NA	NA
NA	NA	H2-D1	Pex19	NA	NA	NA
NA	NA	H2-DMb1	Pfkl	NA	NA	NA
NA	NA	H2-K1	Pgm2l1	NA	NA	NA
NA	NA	H2-K2	Phactr1	NA	NA	NA
NA	NA	H2-Ke6	Phip	NA	NA	NA
NA	NA	H2-Q10	Pkia	NA	NA	NA
NA	NA	Haghl	Pogz	NA	NA	NA
NA	NA	Haus4	Polr2i	NA	NA	NA
NA	NA	Hcfc1r1	Pot1a	NA	NA	NA
NA	NA	Hdac9	Ppfibp1	NA	NA	NA
NA	NA	Hdc	Ppic	NA	NA	NA
NA	NA	Hdgfrp3	Ppil4	NA	NA	NA
NA	NA	Hdhd2	Ppm1e	NA	NA	NA
NA	NA	Heatr5a	Ppm1g	NA	NA	NA
NA	NA	Hebp2	Ppp1r14c	NA	NA	NA
NA	NA	Hecw1	Ppp2r2b	NA	NA	NA
NA	NA	Herpud2	Ppp2r2c	NA	NA	NA
NA	NA	Hfe	Ppp3r1	NA	NA	NA
NA	NA	Hgd	Ppp4c	NA	NA	NA
NA	NA	Hic2	Ppp6r3	NA	NA	NA
NA	NA	Higd1a	Prdx1	NA	NA	NA
NA	NA	Hint3	Prim2	NA	NA	NA
NA	NA	Hist3h2a	Prkacb	NA	NA	NA
NA	NA	Hmbs	Prkdc	NA	NA	NA
NA	NA	Hmg20b	Prrc1	NA	NA	NA
NA	NA	Hmgb1	Prrx1	NA	NA	NA
NA	NA	Hmgb3	Psma7	NA	NA	NA
NA	NA	Hnf4a	Psmb4	NA	NA	NA
NA	NA	Hnrnpk	Psmc6	NA	NA	NA
NA	NA	Hnrnpr	Psmd1	NA	NA	NA
NA	NA	Hoga1	Pspc1	NA	NA	NA
NA	NA	Hopx	Ptma	NA	NA	NA
NA	NA	Hoxa5	Ptp4a1	NA	NA	NA
NA	NA	Hoxa6	Ptpn11	NA	NA	NA
NA	NA	Hoxb3	Ptpn13	NA	NA	NA
NA	NA	Hpd	Ptpn9	NA	NA	NA
NA	NA	Hr	Ptprb	NA	NA	NA
NA	NA	Hras1	Ptprd	NA	NA	NA
NA	NA	Hrasls	Ptprf	NA	NA	NA
NA	NA	Hrh2	Ptprj	NA	NA	NA
NA	NA	Hrh3	Ptprn2	NA	NA	NA
NA	NA	Hrk	Ptprt	NA	NA	NA
NA	NA	Hsbp1	Rab10	NA	NA	NA
NA	NA	Hsbp1l1	Rab12	NA	NA	NA
NA	NA	Hsd3b3	Rab3c	NA	NA	NA
NA	NA	Hsdl2	Rad54l2	NA	NA	NA
NA	NA	Hspb11	Ralgps2	NA	NA	NA
NA	NA	Hspb3	Raly	NA	NA	NA
NA	NA	Hspbap1	Ramp2	NA	NA	NA
NA	NA	Htatip2	Ranbp2	NA	NA	NA
NA	NA	Htatsf1	Ranbp9	NA	NA	NA
NA	NA	Iah1	Rapgef4	NA	NA	NA
NA	NA	Idh3b	Rars	NA	NA	NA
NA	NA	Ier3	Rasa3	NA	NA	NA
NA	NA	Ift122	Rasl2-9-ps	NA	NA	NA
NA	NA	Ift20	Rb1cc1	NA	NA	NA
NA	NA	Ift27	Rbak	NA	NA	NA
NA	NA	Igbp1	Rbbp6	NA	NA	NA
NA	NA	Igf2bp1	Rbfox1	NA	NA	NA
NA	NA	Igfbp3	Rbm25	NA	NA	NA
NA	NA	Igfbp5	Rbm4	NA	NA	NA
NA	NA	Igfbp6	Rbm4b	NA	NA	NA
NA	NA	Igh-VJ558	Rbm5	NA	NA	NA
NA	NA	Iglon5	Rcn2	NA	NA	NA
NA	NA	Il1rap	Reep1	NA	NA	NA
NA	NA	Ilf2	Rgs19	NA	NA	NA
NA	NA	Immp2l	Rgs20	NA	NA	NA
NA	NA	Impa1	Rgs7	NA	NA	NA
NA	NA	Impa2	Rian	NA	NA	NA
NA	NA	Ing1	Rilpl1	NA	NA	NA
NA	NA	Inip	Rims1	NA	NA	NA
NA	NA	Ino80b	Rims3	NA	NA	NA
NA	NA	Inpp5d	Rltpr	NA	NA	NA
NA	NA	Inpp5e	Rnaset2b	NA	NA	NA
NA	NA	Insig2	Rnf128	NA	NA	NA
NA	NA	Ints7	Rnf138	NA	NA	NA
NA	NA	Intu	Rnf187	NA	NA	NA
NA	NA	Iqce	Rnf32	NA	NA	NA
NA	NA	Irak1bp1	Rnf38	NA	NA	NA
NA	NA	Iscu	Rnmt	NA	NA	NA
NA	NA	Isl2	Robo1	NA	NA	NA
NA	NA	Isoc2b	Robo2	NA	NA	NA
NA	NA	Itgb1	Rorb	NA	NA	NA
NA	NA	Itgb3bp	Rph3a	NA	NA	NA
NA	NA	Itpa	Rpia	NA	NA	NA
NA	NA	Itpr2	Rpl18a	NA	NA	NA
NA	NA	Jmjd6	Rpl19	NA	NA	NA
NA	NA	Jsrp1	Rpl21	NA	NA	NA
NA	NA	Kank4	Rpl24	NA	NA	NA
NA	NA	Kazald1	Rpl26	NA	NA	NA
NA	NA	Kbtbd13	Rpl27a	NA	NA	NA
NA	NA	Kbtbd3	Rpl3	NA	NA	NA
NA	NA	Kcna4	Rpl31	NA	NA	NA
NA	NA	Kcna6	Rpl36a	NA	NA	NA
NA	NA	Kcng4	Rpl4	NA	NA	NA
NA	NA	Kcnh3	Rpl8	NA	NA	NA
NA	NA	Kcnq4	Rpl9	NA	NA	NA
NA	NA	Kcns2	Rplp1	NA	NA	NA
NA	NA	Kcnv2	Rpp38	NA	NA	NA
NA	NA	Kctd1	Rprd1b	NA	NA	NA
NA	NA	Kctd12	Rprm	NA	NA	NA
NA	NA	Kctd17	Rps20	NA	NA	NA
NA	NA	Khdrbs2	Rps27a	NA	NA	NA
NA	NA	Kidins220	Rps27l	NA	NA	NA
NA	NA	Kif17	Rps28	NA	NA	NA
NA	NA	Kitl	Rps29	NA	NA	NA
NA	NA	Klc2	Rps3a	NA	NA	NA
NA	NA	Klhdc1	Rps6kl1	NA	NA	NA
NA	NA	Klhl1	Rps7	NA	NA	NA
NA	NA	Klhl11	Rptor	NA	NA	NA
NA	NA	Klhl4	Rtn3	NA	NA	NA
NA	NA	Klk1	Rufy3	NA	NA	NA
NA	NA	Klk6	Ryr2	NA	NA	NA
NA	NA	Klra3	Sbf2	NA	NA	NA
NA	NA	Kmo	Sbno1	NA	NA	NA
NA	NA	Krt1	Scaf11	NA	NA	NA
NA	NA	Krt12	Scaf8	NA	NA	NA
NA	NA	Krt25	Scd2	NA	NA	NA
NA	NA	Krt26	Scg3	NA	NA	NA
NA	NA	Krt28	Schip1	NA	NA	NA
NA	NA	Krt86	Scmh1	NA	NA	NA
NA	NA	L3hypdh	Scn2a1	NA	NA	NA
NA	NA	l7Rn6	Scn8a	NA	NA	NA
NA	NA	Lactb2	Scube3	NA	NA	NA
NA	NA	Lama5	Scyl1	NA	NA	NA
NA	NA	Lamtor2	Scyl3	NA	NA	NA
NA	NA	Lamtor5	Sec14l5	NA	NA	NA
NA	NA	Laptm4b	Sec22c	NA	NA	NA
NA	NA	Laptm5	Sec23a	NA	NA	NA
NA	NA	Lats2	Sel1l3	NA	NA	NA
NA	NA	Lce1d	Senp6	NA	NA	NA
NA	NA	Lce3b	Senp7	NA	NA	NA
NA	NA	Lck	2015-09-01	NA	NA	NA
NA	NA	Lcp1	2002-09-01	NA	NA	NA
NA	NA	Lct	Sergef	NA	NA	NA
NA	NA	Ldhd	Serpinb8	NA	NA	NA
NA	NA	Ldlrad4	Serpine2	NA	NA	NA
NA	NA	Lect2	Setd2	NA	NA	NA
NA	NA	Letm1	Sez6l2	NA	NA	NA
NA	NA	Lgals12	Sgcd	NA	NA	NA
NA	NA	Lgals3	Sgk1	NA	NA	NA
NA	NA	Lhfpl3	Sgms1	NA	NA	NA
NA	NA	Lhpp	Sh3gl2	NA	NA	NA
NA	NA	Lhx5	Shprh	NA	NA	NA
NA	NA	Lin28b	Sik3	NA	NA	NA
NA	NA	Lin7b	Slc12a2	NA	NA	NA
NA	NA	Lins	Slc15a2	NA	NA	NA
NA	NA	Lipt2	Slc17a7	NA	NA	NA
NA	NA	Llph	Slc18a1	NA	NA	NA
NA	NA	Lman1	Slc1a2	NA	NA	NA
NA	NA	Lmo2	Slc22a8	NA	NA	NA
NA	NA	Loh12cr1	Slc25a11	NA	NA	NA
NA	NA	Lonp2	Slc25a17	NA	NA	NA
NA	NA	Lor	Slc25a5	NA	NA	NA
NA	NA	Lox	Slc35a3	NA	NA	NA
NA	NA	Lrba	Slc4a1ap	NA	NA	NA
NA	NA	Lrfn5	Slc6a17	NA	NA	NA
NA	NA	Lrif1	Slc6a8	NA	NA	NA
NA	NA	Lrig1	Slc7a14	NA	NA	NA
NA	NA	Lrrc51	Slc8a1	NA	NA	NA
NA	NA	Lrrtm4	Sltm	NA	NA	NA
NA	NA	Lsm1	Smarcc1	NA	NA	NA
NA	NA	Lsm3	Smarcd1	NA	NA	NA
NA	NA	Lsm5	Smarce1	NA	NA	NA
NA	NA	Lsm6	Smc1a	NA	NA	NA
NA	NA	Lta4h	Smc3	NA	NA	NA
NA	NA	Ltb	Smchd1	NA	NA	NA
NA	NA	Ltv1	Snap91	NA	NA	NA
NA	NA	Lurap1l	Sned1	NA	NA	NA
NA	NA	Ly96	Snhg1	NA	NA	NA
NA	NA	Lyrm1	Snrpa	NA	NA	NA
NA	NA	Lyrm2	Snrpb2	NA	NA	NA
NA	NA	Lyrm4	Snrpd1	NA	NA	NA
NA	NA	Lyrm5	Snx30	NA	NA	NA
NA	NA	Lysmd4	Sobp	NA	NA	NA
NA	NA	Lztfl1	Solh	NA	NA	NA
NA	NA	Mab21l1	Son	NA	NA	NA
NA	NA	Macrod2	Sox11	NA	NA	NA
NA	NA	Mad2l1	Sox12	NA	NA	NA
NA	NA	Mafg	Sox2ot	NA	NA	NA
NA	NA	Mafk	Sox4	NA	NA	NA
NA	NA	Magea2	Sox6	NA	NA	NA
NA	NA	Malsu1	Sp2	NA	NA	NA
NA	NA	Map1lc3b	Spag7	NA	NA	NA
NA	NA	Map3k12	Spag9	NA	NA	NA
NA	NA	Map3k9	Spata7	NA	NA	NA
NA	NA	Map4	Spice1	NA	NA	NA
NA	NA	Map4k2	Spin1	NA	NA	NA
NA	NA	Map9	Spon1	NA	NA	NA
NA	NA	Mapkap1	Srek1	NA	NA	NA
NA	NA	Mapkapk2	Srgap1	NA	NA	NA
NA	NA	2002-03-01	Srrm2	NA	NA	NA
NA	NA	2003-03-01	Srsf1	NA	NA	NA
NA	NA	2004-03-01	Srsf11	NA	NA	NA
NA	NA	Mars2	Srsf4	NA	NA	NA
NA	NA	Maz	Ssb	NA	NA	NA
NA	NA	Mbd4	Ssbp3	NA	NA	NA
NA	NA	Mbnl1	Ssr2	NA	NA	NA
NA	NA	Mbtps1	St18	NA	NA	NA
NA	NA	Mcm10	St8sia5	NA	NA	NA
NA	NA	Mcts1	Stip1	NA	NA	NA
NA	NA	Mcts2	Stk11	NA	NA	NA
NA	NA	Mdm1	Stk39	NA	NA	NA
NA	NA	Mdm4	Stmn1	NA	NA	NA
NA	NA	Me1	Stmn2	NA	NA	NA
NA	NA	Meaf6	Strbp	NA	NA	NA
NA	NA	Med21	Stx7	NA	NA	NA
NA	NA	Med28	Stxbp5l	NA	NA	NA
NA	NA	Med29	Sub1	NA	NA	NA
NA	NA	Med6	Sugp1	NA	NA	NA
NA	NA	Med8	Sugt1	NA	NA	NA
NA	NA	Medag	Sult4a1	NA	NA	NA
NA	NA	Mef2d	Syn1	NA	NA	NA
NA	NA	Mei4	Syn2	NA	NA	NA
NA	NA	Mepce	Syne1	NA	NA	NA
NA	NA	Mesdc1	Syne2	NA	NA	NA
NA	NA	Mettl18	Syngr1	NA	NA	NA
NA	NA	Mettl23	Syt1	NA	NA	NA
NA	NA	Mettl4	Syt4	NA	NA	NA
NA	NA	Mfap3l	Syt9	NA	NA	NA
NA	NA	Mff	Tars	NA	NA	NA
NA	NA	Mfhas1	Tbc1d14	NA	NA	NA
NA	NA	Mgarp	Tbc1d20	NA	NA	NA
NA	NA	Mgme1	Tbck	NA	NA	NA
NA	NA	Mgmt	Tbl2	NA	NA	NA
NA	NA	Mgst2	Tcof1	NA	NA	NA
NA	NA	Mid2	Tdp1	NA	NA	NA
NA	NA	Mien1	Tecr	NA	NA	NA
NA	NA	Mina	Tfap2b	NA	NA	NA
NA	NA	Minos1	Thap3	NA	NA	NA
NA	NA	Mipol1	Thrap3	NA	NA	NA
NA	NA	Mkks	Tle1	NA	NA	NA
NA	NA	Mkl2	Tle4	NA	NA	NA
NA	NA	Mknk1	Tm9sf3	NA	NA	NA
NA	NA	Mkrn1	Tmem135	NA	NA	NA
NA	NA	Mlip	Tmem178	NA	NA	NA
NA	NA	Mlph	Tmem203	NA	NA	NA
NA	NA	Mlx	Tmem38a	NA	NA	NA
NA	NA	Mmab	Tmem50b	NA	NA	NA
NA	NA	Mmd	Tmem55a	NA	NA	NA
NA	NA	Mnf1	Tmem90b	NA	NA	NA
NA	NA	Mob4	Tmem93	NA	NA	NA
NA	NA	Mon1a	Tmod2	NA	NA	NA
NA	NA	Mospd4	Tmsb10	NA	NA	NA
NA	NA	Mpc2	Tnpo1	NA	NA	NA
NA	NA	Mpdu1	Tnr	NA	NA	NA
NA	NA	Mpg	Tnrc18	NA	NA	NA
NA	NA	Mpp2	Tnrc6b	NA	NA	NA
NA	NA	Mri1	Tor1aip2	NA	NA	NA
NA	NA	Mrm1	Tpr	NA	NA	NA
NA	NA	Mrpl13	Trak1	NA	NA	NA
NA	NA	Mrpl27	Trf	NA	NA	NA
NA	NA	Mrpl28	Trim2	NA	NA	NA
NA	NA	Mrpl3	Trim28	NA	NA	NA
NA	NA	Mrpl33	Trim44	NA	NA	NA
NA	NA	Mrpl34	Trpc2	NA	NA	NA
NA	NA	Mrpl37	Trpm3	NA	NA	NA
NA	NA	Mrpl4	Tshz1	NA	NA	NA
NA	NA	Mrpl43	Tspyl2	NA	NA	NA
NA	NA	Mrpl44	Ttc28	NA	NA	NA
NA	NA	Mrpl49	Tti1	NA	NA	NA
NA	NA	Mrpl51	Ttyh2	NA	NA	NA
NA	NA	Mrpl52	Tub	NA	NA	NA
NA	NA	Mrpl53	Tuba1a	NA	NA	NA
NA	NA	Mrpl55	Tuba3b	NA	NA	NA
NA	NA	Mrps10	Tuba4a	NA	NA	NA
NA	NA	Mrps11	Tubb2b	NA	NA	NA
NA	NA	Mrps12	Tubb5	NA	NA	NA
NA	NA	Mrps14	Tulp3	NA	NA	NA
NA	NA	Mrps21	Ubap2	NA	NA	NA
NA	NA	Mrps25	Ube2c	NA	NA	NA
NA	NA	Mrps26	Ube2h	NA	NA	NA
NA	NA	Mrps33	Ube2n	NA	NA	NA
NA	NA	Mrps34	Ube2r2	NA	NA	NA
NA	NA	Mrps36	Ube3a	NA	NA	NA
NA	NA	Mrps5	Ube3c	NA	NA	NA
NA	NA	Mrps6	Ube4b	NA	NA	NA
NA	NA	Mrps7	Ubp1	NA	NA	NA
NA	NA	Mrrf	Ubr2	NA	NA	NA
NA	NA	Msrb2	Ubr4	NA	NA	NA
NA	NA	Mtap	Uhrf1	NA	NA	NA
NA	NA	Mtcp1	Uncx	NA	NA	NA
NA	NA	Mtdh	Usp10	NA	NA	NA
NA	NA	Mtf1	Usp11	NA	NA	NA
NA	NA	Mtfr1	Usp29	NA	NA	NA
NA	NA	Mtfr1l	Usp37	NA	NA	NA
NA	NA	Mthfd2l	Usp47	NA	NA	NA
NA	NA	Mthfsd	Usp48	NA	NA	NA
NA	NA	Mtl5	Usp7	NA	NA	NA
NA	NA	Mtmr11	Ust	NA	NA	NA
NA	NA	Mtmr7	Uxs1	NA	NA	NA
NA	NA	Mttp	Vash1	NA	NA	NA
NA	NA	Mtus1	Vldlr	NA	NA	NA
NA	NA	Mtx2	Vps35	NA	NA	NA
NA	NA	Mtx3	Vsnl1	NA	NA	NA
NA	NA	Mup1	Vti1a	NA	NA	NA
NA	NA	Mup4	Wdhd1	NA	NA	NA
NA	NA	Myadml2	Wdr25	NA	NA	NA
NA	NA	Mycbp	Wdr47	NA	NA	NA
NA	NA	Mycl1	Wdr7	NA	NA	NA
NA	NA	Myl12a	Wdyhv1	NA	NA	NA
NA	NA	Myl2	Wtip	NA	NA	NA
NA	NA	Mylk2	Xkr4	NA	NA	NA
NA	NA	Myo1b	Xpo6	NA	NA	NA
NA	NA	Myof	Ypel2	NA	NA	NA
NA	NA	Myoz1	Zbtb10	NA	NA	NA
NA	NA	Mzt1	Zbtb41	NA	NA	NA
NA	NA	Mzt2	Zbtb43	NA	NA	NA
NA	NA	N6amt2	Zc3h11a	NA	NA	NA
NA	NA	Naa60	Zdhhc13	NA	NA	NA
NA	NA	Nabp2	Zdhhc21	NA	NA	NA
NA	NA	Nadsyn1	Zdhhc6	NA	NA	NA
NA	NA	Nans	Zeb1	NA	NA	NA
NA	NA	Narf	Zfc3h1	NA	NA	NA
NA	NA	Nat9	Zfml	NA	NA	NA
NA	NA	Ncbp2	Zfp148	NA	NA	NA
NA	NA	Ncor1	Zfp207	NA	NA	NA
NA	NA	Ncrna00086	Zfp292	NA	NA	NA
NA	NA	Ndfip2	Zfp295	NA	NA	NA
NA	NA	Ndufa2	Zfp318	NA	NA	NA
NA	NA	Ndufa3	Zfp354b	NA	NA	NA
NA	NA	Ndufa4	Zfp362	NA	NA	NA
NA	NA	Ndufa7	Zfp532	NA	NA	NA
NA	NA	Ndufaf2	Zfp536	NA	NA	NA
NA	NA	Ndufaf5	Zfp654	NA	NA	NA
NA	NA	Ndufaf6	Zfp71-rs1	NA	NA	NA
NA	NA	Ndufb6	Zfp9	NA	NA	NA
NA	NA	Ndufb8	Zfpm2	NA	NA	NA
NA	NA	Ndufs5	Zkscan3	NA	NA	NA
NA	NA	Necab2	Zmiz1	NA	NA	NA
NA	NA	Nedd8	Zmynd8	NA	NA	NA
NA	NA	Nek2	Zscan21	NA	NA	NA
NA	NA	Nek4	Zzz3	NA	NA	NA
NA	NA	Nek7	NA	NA	NA	NA
NA	NA	Nf2	NA	NA	NA	NA
NA	NA	Nfatc2	NA	NA	NA	NA
NA	NA	Nfs1	NA	NA	NA	NA
NA	NA	Nhej1	NA	NA	NA	NA
NA	NA	Nhp2	NA	NA	NA	NA
NA	NA	Ninj1	NA	NA	NA	NA
NA	NA	Ninl	NA	NA	NA	NA
NA	NA	Nipsnap1	NA	NA	NA	NA
NA	NA	Nipsnap3b	NA	NA	NA	NA
NA	NA	Nisch	NA	NA	NA	NA
NA	NA	Nkiras1	NA	NA	NA	NA
NA	NA	Nkx2-5	NA	NA	NA	NA
NA	NA	Nme5	NA	NA	NA	NA
NA	NA	Nol3	NA	NA	NA	NA
NA	NA	Nol4	NA	NA	NA	NA
NA	NA	Nop10	NA	NA	NA	NA
NA	NA	Nop16	NA	NA	NA	NA
NA	NA	Npc1l1	NA	NA	NA	NA
NA	NA	Nptx2	NA	NA	NA	NA
NA	NA	Nptxr	NA	NA	NA	NA
NA	NA	Nqo2	NA	NA	NA	NA
NA	NA	Nr2c2	NA	NA	NA	NA
NA	NA	Nr2f6	NA	NA	NA	NA
NA	NA	Nrip2	NA	NA	NA	NA
NA	NA	Nrip3	NA	NA	NA	NA
NA	NA	Nrk	NA	NA	NA	NA
NA	NA	Nrsn2	NA	NA	NA	NA
NA	NA	Nsg2	NA	NA	NA	NA
NA	NA	Nsmf	NA	NA	NA	NA
NA	NA	Nsun4	NA	NA	NA	NA
NA	NA	Nsun6	NA	NA	NA	NA
NA	NA	Nt5m	NA	NA	NA	NA
NA	NA	Ntn1	NA	NA	NA	NA
NA	NA	Ntpcr	NA	NA	NA	NA
NA	NA	Nubp1	NA	NA	NA	NA
NA	NA	Nubp2	NA	NA	NA	NA
NA	NA	Nucks1	NA	NA	NA	NA
NA	NA	Nudt11	NA	NA	NA	NA
NA	NA	Nudt12	NA	NA	NA	NA
NA	NA	Nudt14	NA	NA	NA	NA
NA	NA	Nudt16	NA	NA	NA	NA
NA	NA	Nudt19	NA	NA	NA	NA
NA	NA	Nudt2	NA	NA	NA	NA
NA	NA	Nudt6	NA	NA	NA	NA
NA	NA	Nudt8	NA	NA	NA	NA
NA	NA	Nufip1	NA	NA	NA	NA
NA	NA	Nup188	NA	NA	NA	NA
NA	NA	Nup62	NA	NA	NA	NA
NA	NA	Nup93	NA	NA	NA	NA
NA	NA	Nupr1	NA	NA	NA	NA
NA	NA	Nutf2-ps1	NA	NA	NA	NA
NA	NA	Nwd1	NA	NA	NA	NA
NA	NA	Oas2	NA	NA	NA	NA
NA	NA	Oaz3	NA	NA	NA	NA
NA	NA	Ocel1	NA	NA	NA	NA
NA	NA	Ogfod1	NA	NA	NA	NA
NA	NA	Ogg1	NA	NA	NA	NA
NA	NA	Ola1	NA	NA	NA	NA
NA	NA	Opn3	NA	NA	NA	NA
NA	NA	Orai2	NA	NA	NA	NA
NA	NA	Orai3	NA	NA	NA	NA
NA	NA	Osbpl1a	NA	NA	NA	NA
NA	NA	Osbpl6	NA	NA	NA	NA
NA	NA	Oscp1	NA	NA	NA	NA
NA	NA	Osgepl1	NA	NA	NA	NA
NA	NA	Ost4	NA	NA	NA	NA
NA	NA	Otud4	NA	NA	NA	NA
NA	NA	Oxct1	NA	NA	NA	NA
NA	NA	Oxld1	NA	NA	NA	NA
NA	NA	Oxt	NA	NA	NA	NA
NA	NA	P2rx3	NA	NA	NA	NA
NA	NA	P2rx7	NA	NA	NA	NA
NA	NA	P4htm	NA	NA	NA	NA
NA	NA	Pagr1a	NA	NA	NA	NA
NA	NA	Pah	NA	NA	NA	NA
NA	NA	Paics	NA	NA	NA	NA
NA	NA	Palld	NA	NA	NA	NA
NA	NA	Palm2	NA	NA	NA	NA
NA	NA	Pank2	NA	NA	NA	NA
NA	NA	Papola	NA	NA	NA	NA
NA	NA	Paqr3	NA	NA	NA	NA
NA	NA	Park2	NA	NA	NA	NA
NA	NA	Parn	NA	NA	NA	NA
NA	NA	Parp11	NA	NA	NA	NA
NA	NA	Parp9	NA	NA	NA	NA
NA	NA	Pawr	NA	NA	NA	NA
NA	NA	Pcbd1	NA	NA	NA	NA
NA	NA	Pcbd2	NA	NA	NA	NA
NA	NA	Pccb	NA	NA	NA	NA
NA	NA	Pcdh17	NA	NA	NA	NA
NA	NA	Pcdha4	NA	NA	NA	NA
NA	NA	Pcdhac1	NA	NA	NA	NA
NA	NA	Pcdhb15	NA	NA	NA	NA
NA	NA	Pcdhb18	NA	NA	NA	NA
NA	NA	Pcdhb22	NA	NA	NA	NA
NA	NA	Pcdhb9	NA	NA	NA	NA
NA	NA	Pcdhgc3	NA	NA	NA	NA
NA	NA	Pced1a	NA	NA	NA	NA
NA	NA	Pcgf6	NA	NA	NA	NA
NA	NA	Pcm1	NA	NA	NA	NA
NA	NA	Pcmtd1	NA	NA	NA	NA
NA	NA	Pcp4l1	NA	NA	NA	NA
NA	NA	Pcsk6	NA	NA	NA	NA
NA	NA	Pdcl	NA	NA	NA	NA
NA	NA	Pddc1	NA	NA	NA	NA
NA	NA	Pde6d	NA	NA	NA	NA
NA	NA	Pde6h	NA	NA	NA	NA
NA	NA	Pde7b	NA	NA	NA	NA
NA	NA	Pdilt	NA	NA	NA	NA
NA	NA	Pdk3	NA	NA	NA	NA
NA	NA	Pdrg1	NA	NA	NA	NA
NA	NA	Pdzd11	NA	NA	NA	NA
NA	NA	Pdzrn3	NA	NA	NA	NA
NA	NA	Pear1	NA	NA	NA	NA
NA	NA	Pet112	NA	NA	NA	NA
NA	NA	Pex13	NA	NA	NA	NA
NA	NA	Pex2	NA	NA	NA	NA
NA	NA	Pfdn1	NA	NA	NA	NA
NA	NA	Pfdn5	NA	NA	NA	NA
NA	NA	Pfkfb1	NA	NA	NA	NA
NA	NA	Pfkfb3	NA	NA	NA	NA
NA	NA	Pfn4	NA	NA	NA	NA
NA	NA	Pgbd5	NA	NA	NA	NA
NA	NA	Pgr	NA	NA	NA	NA
NA	NA	Phb	NA	NA	NA	NA
NA	NA	Phf1	NA	NA	NA	NA
NA	NA	Phf17	NA	NA	NA	NA
NA	NA	Phf20l1	NA	NA	NA	NA
NA	NA	Phospho2	NA	NA	NA	NA
NA	NA	Pi4k2a	NA	NA	NA	NA
NA	NA	Pigk	NA	NA	NA	NA
NA	NA	Pigl	NA	NA	NA	NA
NA	NA	Pigp	NA	NA	NA	NA
NA	NA	Pigs	NA	NA	NA	NA
NA	NA	Pigu	NA	NA	NA	NA
NA	NA	Pik3ca	NA	NA	NA	NA
NA	NA	Pik3cd	NA	NA	NA	NA
NA	NA	Pim1	NA	NA	NA	NA
NA	NA	Pip5k1a	NA	NA	NA	NA
NA	NA	Pip5k1b	NA	NA	NA	NA
NA	NA	Pitrm1	NA	NA	NA	NA
NA	NA	Pkd2l2	NA	NA	NA	NA
NA	NA	Pkmyt1	NA	NA	NA	NA
NA	NA	Pkp3	NA	NA	NA	NA
NA	NA	Pla2g12a	NA	NA	NA	NA
NA	NA	Pla2g12b	NA	NA	NA	NA
NA	NA	Pla2g4b	NA	NA	NA	NA
NA	NA	Pla2g4c	NA	NA	NA	NA
NA	NA	Pla2g5	NA	NA	NA	NA
NA	NA	Pla2r1	NA	NA	NA	NA
NA	NA	Plaur	NA	NA	NA	NA
NA	NA	Plbd2	NA	NA	NA	NA
NA	NA	Plcb3	NA	NA	NA	NA
NA	NA	Plekha3	NA	NA	NA	NA
NA	NA	Plekha4	NA	NA	NA	NA
NA	NA	Plekha7	NA	NA	NA	NA
NA	NA	Plekha8	NA	NA	NA	NA
NA	NA	Plekhg5	NA	NA	NA	NA
NA	NA	Pls3	NA	NA	NA	NA
NA	NA	Pmm1	NA	NA	NA	NA
NA	NA	Pms2	NA	NA	NA	NA
NA	NA	Pno1	NA	NA	NA	NA
NA	NA	Pnpo	NA	NA	NA	NA
NA	NA	Pofut2	NA	NA	NA	NA
NA	NA	Pold3	NA	NA	NA	NA
NA	NA	Pole3	NA	NA	NA	NA
NA	NA	Polr1d	NA	NA	NA	NA
NA	NA	Polr2f	NA	NA	NA	NA
NA	NA	Polr2j	NA	NA	NA	NA
NA	NA	Polr2k	NA	NA	NA	NA
NA	NA	Polr2l	NA	NA	NA	NA
NA	NA	Polr3h	NA	NA	NA	NA
NA	NA	Polr3k	NA	NA	NA	NA
NA	NA	Pom121	NA	NA	NA	NA
NA	NA	Pomp	NA	NA	NA	NA
NA	NA	Ppap2a	NA	NA	NA	NA
NA	NA	Ppapdc2	NA	NA	NA	NA
NA	NA	Ppard	NA	NA	NA	NA
NA	NA	Ppcdc	NA	NA	NA	NA
NA	NA	Ppcs	NA	NA	NA	NA
NA	NA	Ppdpf	NA	NA	NA	NA
NA	NA	Pphln1	NA	NA	NA	NA
NA	NA	Ppid	NA	NA	NA	NA
NA	NA	Ppih	NA	NA	NA	NA
NA	NA	Ppil1	NA	NA	NA	NA
NA	NA	Ppil3	NA	NA	NA	NA
NA	NA	Ppm1a	NA	NA	NA	NA
NA	NA	Ppm1b	NA	NA	NA	NA
NA	NA	Ppm1j	NA	NA	NA	NA
NA	NA	Ppp1r11	NA	NA	NA	NA
NA	NA	Ppp1r12c	NA	NA	NA	NA
NA	NA	Ppp1r14b	NA	NA	NA	NA
NA	NA	Ppp1r18	NA	NA	NA	NA
NA	NA	Ppp1r2	NA	NA	NA	NA
NA	NA	Ppp1r8	NA	NA	NA	NA
NA	NA	Ppp2r3c	NA	NA	NA	NA
NA	NA	Ppp2r5a	NA	NA	NA	NA
NA	NA	Ppp2r5e	NA	NA	NA	NA
NA	NA	Ppp3cb	NA	NA	NA	NA
NA	NA	Ppp4r4	NA	NA	NA	NA
NA	NA	Pradc1	NA	NA	NA	NA
NA	NA	Prdx5	NA	NA	NA	NA
NA	NA	Preb	NA	NA	NA	NA
NA	NA	Prelid1	NA	NA	NA	NA
NA	NA	Prh1	NA	NA	NA	NA
NA	NA	Prkag2	NA	NA	NA	NA
NA	NA	Prkar2b	NA	NA	NA	NA
NA	NA	Prkca	NA	NA	NA	NA
NA	NA	Prkcz	NA	NA	NA	NA
NA	NA	Prkd1	NA	NA	NA	NA
NA	NA	Prl2c5	NA	NA	NA	NA
NA	NA	Prmt3	NA	NA	NA	NA
NA	NA	Prmt6	NA	NA	NA	NA
NA	NA	Procr	NA	NA	NA	NA
NA	NA	Prpf31	NA	NA	NA	NA
NA	NA	Prps2	NA	NA	NA	NA
NA	NA	Prrt4	NA	NA	NA	NA
NA	NA	Prss16	NA	NA	NA	NA
NA	NA	Pskh1	NA	NA	NA	NA
NA	NA	Psma8	NA	NA	NA	NA
NA	NA	Psmb1	NA	NA	NA	NA
NA	NA	Psmb10	NA	NA	NA	NA
NA	NA	Psmb7	NA	NA	NA	NA
NA	NA	Psmd10	NA	NA	NA	NA
NA	NA	Psmd6	NA	NA	NA	NA
NA	NA	Psme2	NA	NA	NA	NA
NA	NA	Psmg2	NA	NA	NA	NA
NA	NA	Psmg4	NA	NA	NA	NA
NA	NA	Pstk	NA	NA	NA	NA
NA	NA	Ptar1	NA	NA	NA	NA
NA	NA	Ptbp1	NA	NA	NA	NA
NA	NA	Ptcd1	NA	NA	NA	NA
NA	NA	Ptcd2	NA	NA	NA	NA
NA	NA	Ptdss2	NA	NA	NA	NA
NA	NA	Ptger2	NA	NA	NA	NA
NA	NA	Ptgfrn	NA	NA	NA	NA
NA	NA	Ptgr2	NA	NA	NA	NA
NA	NA	Ptk2	NA	NA	NA	NA
NA	NA	Ptp4a3	NA	NA	NA	NA
NA	NA	Ptpn2	NA	NA	NA	NA
NA	NA	Ptpru	NA	NA	NA	NA
NA	NA	Ptrh1	NA	NA	NA	NA
NA	NA	Ptrhd1	NA	NA	NA	NA
NA	NA	Pts	NA	NA	NA	NA
NA	NA	Pttg1	NA	NA	NA	NA
NA	NA	Pvr	NA	NA	NA	NA
NA	NA	Pvt1	NA	NA	NA	NA
NA	NA	Pycr2	NA	NA	NA	NA
NA	NA	Pyurf	NA	NA	NA	NA
NA	NA	Pyy	NA	NA	NA	NA
NA	NA	Qars	NA	NA	NA	NA
NA	NA	Qpctl	NA	NA	NA	NA
NA	NA	Qrsl1	NA	NA	NA	NA
NA	NA	R3hdm4	NA	NA	NA	NA
NA	NA	Rab17	NA	NA	NA	NA
NA	NA	Rab18	NA	NA	NA	NA
NA	NA	Rab2a	NA	NA	NA	NA
NA	NA	Rab2b	NA	NA	NA	NA
NA	NA	Rab39	NA	NA	NA	NA
NA	NA	Rab4b	NA	NA	NA	NA
NA	NA	Rab6b	NA	NA	NA	NA
NA	NA	Rabep1	NA	NA	NA	NA
NA	NA	Rad18	NA	NA	NA	NA
NA	NA	Rad54b	NA	NA	NA	NA
NA	NA	Radil	NA	NA	NA	NA
NA	NA	Rai2	NA	NA	NA	NA
NA	NA	Ralb	NA	NA	NA	NA
NA	NA	Ralgps1	NA	NA	NA	NA
NA	NA	Rapgef5	NA	NA	NA	NA
NA	NA	Rasgef1a	NA	NA	NA	NA
NA	NA	Rasl11b	NA	NA	NA	NA
NA	NA	Rasl2-9	NA	NA	NA	NA
NA	NA	Rassf3	NA	NA	NA	NA
NA	NA	Rassf6	NA	NA	NA	NA
NA	NA	Rbm15b	NA	NA	NA	NA
NA	NA	Rbm18	NA	NA	NA	NA
NA	NA	Rbm19	NA	NA	NA	NA
NA	NA	Rbm26	NA	NA	NA	NA
NA	NA	Rbm33	NA	NA	NA	NA
NA	NA	Rbms3	NA	NA	NA	NA
NA	NA	Rbp7	NA	NA	NA	NA
NA	NA	Rbx1	NA	NA	NA	NA
NA	NA	Rcan1	NA	NA	NA	NA
NA	NA	Rcbtb1	NA	NA	NA	NA
NA	NA	Rcor3	NA	NA	NA	NA
NA	NA	Rdh11	NA	NA	NA	NA
NA	NA	Recql	NA	NA	NA	NA
NA	NA	Rela	NA	NA	NA	NA
NA	NA	Rell2	NA	NA	NA	NA
NA	NA	Rfc2	NA	NA	NA	NA
NA	NA	Rfesd	NA	NA	NA	NA
NA	NA	Rfxank	NA	NA	NA	NA
NA	NA	Rgs10	NA	NA	NA	NA
NA	NA	Rgs14	NA	NA	NA	NA
NA	NA	Rgs16	NA	NA	NA	NA
NA	NA	Rgs3	NA	NA	NA	NA
NA	NA	Rgs7bp	NA	NA	NA	NA
NA	NA	Rhbdl3	NA	NA	NA	NA
NA	NA	Rhobtb1	NA	NA	NA	NA
NA	NA	Rhobtb2	NA	NA	NA	NA
NA	NA	Rhod	NA	NA	NA	NA
NA	NA	Rhou	NA	NA	NA	NA
NA	NA	Rhox6	NA	NA	NA	NA
NA	NA	Ric3	NA	NA	NA	NA
NA	NA	Riiad1	NA	NA	NA	NA
NA	NA	Rimklb	NA	NA	NA	NA
NA	NA	Rims4	NA	NA	NA	NA
NA	NA	Rinl	NA	NA	NA	NA
NA	NA	Riok2	NA	NA	NA	NA
NA	NA	Rmdn2	NA	NA	NA	NA
NA	NA	Rmdn3	NA	NA	NA	NA
NA	NA	Rnaseh2c	NA	NA	NA	NA
NA	NA	Rnd1	NA	NA	NA	NA
NA	NA	Rnf11	NA	NA	NA	NA
NA	NA	Rnf115	NA	NA	NA	NA
NA	NA	Rnf144b	NA	NA	NA	NA
NA	NA	Rnf166	NA	NA	NA	NA
NA	NA	Rnf20	NA	NA	NA	NA
NA	NA	Rnf34	NA	NA	NA	NA
NA	NA	Rnf5	NA	NA	NA	NA
NA	NA	Rnf8	NA	NA	NA	NA
NA	NA	Rpf2	NA	NA	NA	NA
NA	NA	Rpgr	NA	NA	NA	NA
NA	NA	Rpgrip1	NA	NA	NA	NA
NA	NA	Rpl22	NA	NA	NA	NA
NA	NA	Rpl27	NA	NA	NA	NA
NA	NA	Rpl35a	NA	NA	NA	NA
NA	NA	Rpl37a	NA	NA	NA	NA
NA	NA	Rpl7l1	NA	NA	NA	NA
NA	NA	Rpp14	NA	NA	NA	NA
NA	NA	Rpp21	NA	NA	NA	NA
NA	NA	Rpp40	NA	NA	NA	NA
NA	NA	Rps12	NA	NA	NA	NA
NA	NA	Rps13	NA	NA	NA	NA
NA	NA	Rps19bp1	NA	NA	NA	NA
NA	NA	Rps26	NA	NA	NA	NA
NA	NA	Rps27	NA	NA	NA	NA
NA	NA	Rps4y2	NA	NA	NA	NA
NA	NA	Rps6ka3	NA	NA	NA	NA
NA	NA	Rps6kb1	NA	NA	NA	NA
NA	NA	Rpusd3	NA	NA	NA	NA
NA	NA	Rras2	NA	NA	NA	NA
NA	NA	Rrm2b	NA	NA	NA	NA
NA	NA	Rrp12	NA	NA	NA	NA
NA	NA	Rrp15	NA	NA	NA	NA
NA	NA	Rrp7a	NA	NA	NA	NA
NA	NA	Rrp9	NA	NA	NA	NA
NA	NA	Rsph10b2	NA	NA	NA	NA
NA	NA	Rspo3	NA	NA	NA	NA
NA	NA	Rtel1	NA	NA	NA	NA
NA	NA	Runx1	NA	NA	NA	NA
NA	NA	Rwdd1	NA	NA	NA	NA
NA	NA	Sac3d1	NA	NA	NA	NA
NA	NA	Samd4b	NA	NA	NA	NA
NA	NA	Samm50	NA	NA	NA	NA
NA	NA	Sap18	NA	NA	NA	NA
NA	NA	Sat1	NA	NA	NA	NA
NA	NA	Sav1	NA	NA	NA	NA
NA	NA	Sbsn	NA	NA	NA	NA
NA	NA	Sc5d	NA	NA	NA	NA
NA	NA	Scarf2	NA	NA	NA	NA
NA	NA	Scd3	NA	NA	NA	NA
NA	NA	Scin	NA	NA	NA	NA
NA	NA	Scoc	NA	NA	NA	NA
NA	NA	Scube1	NA	NA	NA	NA
NA	NA	Sdf2l1	NA	NA	NA	NA
NA	NA	Sdhaf2	NA	NA	NA	NA
NA	NA	Sdhc	NA	NA	NA	NA
NA	NA	Sdhd	NA	NA	NA	NA
NA	NA	Sdr42e1	NA	NA	NA	NA
NA	NA	Sec22b	NA	NA	NA	NA
NA	NA	Sec61g	NA	NA	NA	NA
NA	NA	Selrc1	NA	NA	NA	NA
NA	NA	Sema6c	NA	NA	NA	NA
NA	NA	Sema7a	NA	NA	NA	NA
NA	NA	Senp5	NA	NA	NA	NA
NA	NA	Senp8	NA	NA	NA	NA
NA	NA	Sephs2	NA	NA	NA	NA
NA	NA	2007-09-01	NA	NA	NA	NA
NA	NA	Serac1	NA	NA	NA	NA
NA	NA	Serpinb6a	NA	NA	NA	NA
NA	NA	Sertad2	NA	NA	NA	NA
NA	NA	Setd6	NA	NA	NA	NA
NA	NA	Sf3b2	NA	NA	NA	NA
NA	NA	Sf3b4	NA	NA	NA	NA
NA	NA	Sft2d1	NA	NA	NA	NA
NA	NA	Sftpb	NA	NA	NA	NA
NA	NA	Sgip1	NA	NA	NA	NA
NA	NA	Sh3bgrl	NA	NA	NA	NA
NA	NA	Sh3bgrl3	NA	NA	NA	NA
NA	NA	Sh3d19	NA	NA	NA	NA
NA	NA	Sharpin	NA	NA	NA	NA
NA	NA	Shc2	NA	NA	NA	NA
NA	NA	Shc4	NA	NA	NA	NA
NA	NA	Shh	NA	NA	NA	NA
NA	NA	Shisa2	NA	NA	NA	NA
NA	NA	Shmt1	NA	NA	NA	NA
NA	NA	Siah1a	NA	NA	NA	NA
NA	NA	Sigmar1	NA	NA	NA	NA
NA	NA	Sirt5	NA	NA	NA	NA
NA	NA	Siva1	NA	NA	NA	NA
NA	NA	Six4	NA	NA	NA	NA
NA	NA	Slain2	NA	NA	NA	NA
NA	NA	Slc12a1	NA	NA	NA	NA
NA	NA	Slc12a8	NA	NA	NA	NA
NA	NA	Slc16a9	NA	NA	NA	NA
NA	NA	Slc17a9	NA	NA	NA	NA
NA	NA	Slc22a12	NA	NA	NA	NA
NA	NA	Slc24a6	NA	NA	NA	NA
NA	NA	Slc25a19	NA	NA	NA	NA
NA	NA	Slc25a25	NA	NA	NA	NA
NA	NA	Slc25a26	NA	NA	NA	NA
NA	NA	Slc25a27	NA	NA	NA	NA
NA	NA	Slc25a29	NA	NA	NA	NA
NA	NA	Slc25a36	NA	NA	NA	NA
NA	NA	Slc25a38	NA	NA	NA	NA
NA	NA	Slc25a39	NA	NA	NA	NA
NA	NA	Slc25a47	NA	NA	NA	NA
NA	NA	Slc25a53	NA	NA	NA	NA
NA	NA	Slc26a1	NA	NA	NA	NA
NA	NA	Slc27a2	NA	NA	NA	NA
NA	NA	Slc2a3	NA	NA	NA	NA
NA	NA	Slc35b1	NA	NA	NA	NA
NA	NA	Slc35b2	NA	NA	NA	NA
NA	NA	Slc35f1	NA	NA	NA	NA
NA	NA	Slc39a11	NA	NA	NA	NA
NA	NA	Slc39a14	NA	NA	NA	NA
NA	NA	Slc41a3	NA	NA	NA	NA
NA	NA	Slc46a1	NA	NA	NA	NA
NA	NA	Slc4a8	NA	NA	NA	NA
NA	NA	Slc51b	NA	NA	NA	NA
NA	NA	Slc5a1	NA	NA	NA	NA
NA	NA	Slc6a13	NA	NA	NA	NA
NA	NA	Slc7a1	NA	NA	NA	NA
NA	NA	Slc9a3	NA	NA	NA	NA
NA	NA	Slco2b1	NA	NA	NA	NA
NA	NA	Slirp	NA	NA	NA	NA
NA	NA	Slmo2	NA	NA	NA	NA
NA	NA	Smcr7l	NA	NA	NA	NA
NA	NA	Smim4	NA	NA	NA	NA
NA	NA	Smim7	NA	NA	NA	NA
NA	NA	Smim8	NA	NA	NA	NA
NA	NA	Smpx	NA	NA	NA	NA
NA	NA	Sms	NA	NA	NA	NA
NA	NA	Smyd4	NA	NA	NA	NA
NA	NA	Snhg10	NA	NA	NA	NA
NA	NA	Snhg6	NA	NA	NA	NA
NA	NA	Snrnp25	NA	NA	NA	NA
NA	NA	Snrnp40	NA	NA	NA	NA
NA	NA	Snrpn	NA	NA	NA	NA
NA	NA	Snurf	NA	NA	NA	NA
NA	NA	Snx12	NA	NA	NA	NA
NA	NA	Snx2	NA	NA	NA	NA
NA	NA	Snx21	NA	NA	NA	NA
NA	NA	Snx32	NA	NA	NA	NA
NA	NA	Sos1	NA	NA	NA	NA
NA	NA	Sox5	NA	NA	NA	NA
NA	NA	Sp110	NA	NA	NA	NA
NA	NA	Spa17	NA	NA	NA	NA
NA	NA	Spag5	NA	NA	NA	NA
NA	NA	Spata24	NA	NA	NA	NA
NA	NA	Spats2l	NA	NA	NA	NA
NA	NA	Spdya	NA	NA	NA	NA
NA	NA	Speer3	NA	NA	NA	NA
NA	NA	Spg7	NA	NA	NA	NA
NA	NA	Sphk1	NA	NA	NA	NA
NA	NA	Spin2	NA	NA	NA	NA
NA	NA	Spock3	NA	NA	NA	NA
NA	NA	Spr	NA	NA	NA	NA
NA	NA	Spsb1	NA	NA	NA	NA
NA	NA	Spsb4	NA	NA	NA	NA
NA	NA	Srl	NA	NA	NA	NA
NA	NA	Srms	NA	NA	NA	NA
NA	NA	Srp9	NA	NA	NA	NA
NA	NA	Srr	NA	NA	NA	NA
NA	NA	Srxn1	NA	NA	NA	NA
NA	NA	Ss18l1	NA	NA	NA	NA
NA	NA	Ssbp1	NA	NA	NA	NA
NA	NA	Sssca1	NA	NA	NA	NA
NA	NA	St3gal6	NA	NA	NA	NA
NA	NA	St6galnac6	NA	NA	NA	NA
NA	NA	St8sia4	NA	NA	NA	NA
NA	NA	Stac	NA	NA	NA	NA
NA	NA	Stam2	NA	NA	NA	NA
NA	NA	Stambpl1	NA	NA	NA	NA
NA	NA	Steap1	NA	NA	NA	NA
NA	NA	Stil	NA	NA	NA	NA
NA	NA	Stk16	NA	NA	NA	NA
NA	NA	Stk19	NA	NA	NA	NA
NA	NA	Stk30	NA	NA	NA	NA
NA	NA	Stk35	NA	NA	NA	NA
NA	NA	Stradb	NA	NA	NA	NA
NA	NA	Strap	NA	NA	NA	NA
NA	NA	Strip2	NA	NA	NA	NA
NA	NA	Stub1	NA	NA	NA	NA
NA	NA	Stx6	NA	NA	NA	NA
NA	NA	Stx8	NA	NA	NA	NA
NA	NA	Sult2b1	NA	NA	NA	NA
NA	NA	Sult5a1	NA	NA	NA	NA
NA	NA	Sumf1	NA	NA	NA	NA
NA	NA	Supt20	NA	NA	NA	NA
NA	NA	Susd4	NA	NA	NA	NA
NA	NA	Suz12	NA	NA	NA	NA
NA	NA	Svil	NA	NA	NA	NA
NA	NA	Svip	NA	NA	NA	NA
NA	NA	Swsap1	NA	NA	NA	NA
NA	NA	Syap1	NA	NA	NA	NA
NA	NA	Sycp1	NA	NA	NA	NA
NA	NA	Sycp3	NA	NA	NA	NA
NA	NA	Syndig1	NA	NA	NA	NA
NA	NA	Synj2	NA	NA	NA	NA
NA	NA	Synj2bp	NA	NA	NA	NA
NA	NA	Tacr1	NA	NA	NA	NA
NA	NA	Taf10	NA	NA	NA	NA
NA	NA	Taf1d	NA	NA	NA	NA
NA	NA	Taf9	NA	NA	NA	NA
NA	NA	Tank	NA	NA	NA	NA
NA	NA	Taok3	NA	NA	NA	NA
NA	NA	Tap2	NA	NA	NA	NA
NA	NA	Tardbp	NA	NA	NA	NA
NA	NA	Tas1r3	NA	NA	NA	NA
NA	NA	Tasp1	NA	NA	NA	NA
NA	NA	Tatdn1	NA	NA	NA	NA
NA	NA	Tbc1d7	NA	NA	NA	NA
NA	NA	Tbcc	NA	NA	NA	NA
NA	NA	Tbccd1	NA	NA	NA	NA
NA	NA	Tbl1x	NA	NA	NA	NA
NA	NA	Tbx1	NA	NA	NA	NA
NA	NA	Tceb1	NA	NA	NA	NA
NA	NA	Tcf19	NA	NA	NA	NA
NA	NA	Tcf20	NA	NA	NA	NA
NA	NA	Tcf23	NA	NA	NA	NA
NA	NA	Tcf25	NA	NA	NA	NA
NA	NA	Tcpm1	NA	NA	NA	NA
NA	NA	Tcrb-J	NA	NA	NA	NA
NA	NA	Tcta	NA	NA	NA	NA
NA	NA	Tctex1d2	NA	NA	NA	NA
NA	NA	Tdh	NA	NA	NA	NA
NA	NA	Ten1	NA	NA	NA	NA
NA	NA	Tenm2	NA	NA	NA	NA
NA	NA	Tenm3	NA	NA	NA	NA
NA	NA	Tes3-ps	NA	NA	NA	NA
NA	NA	Tfap2a	NA	NA	NA	NA
NA	NA	Tfb1m	NA	NA	NA	NA
NA	NA	Tfe3	NA	NA	NA	NA
NA	NA	Tfg	NA	NA	NA	NA
NA	NA	Tfpt	NA	NA	NA	NA
NA	NA	Tgfb1	NA	NA	NA	NA
NA	NA	Tgm2	NA	NA	NA	NA
NA	NA	Th	NA	NA	NA	NA
NA	NA	Them6	NA	NA	NA	NA
NA	NA	Thg1l	NA	NA	NA	NA
NA	NA	Thsd1	NA	NA	NA	NA
NA	NA	Thyn1	NA	NA	NA	NA
NA	NA	Timm10	NA	NA	NA	NA
NA	NA	Timm10b	NA	NA	NA	NA
NA	NA	Timm17a	NA	NA	NA	NA
NA	NA	Timm17b	NA	NA	NA	NA
NA	NA	Timm44	NA	NA	NA	NA
NA	NA	Timm9	NA	NA	NA	NA
NA	NA	Timmdc1	NA	NA	NA	NA
NA	NA	Timp2	NA	NA	NA	NA
NA	NA	Tinf2	NA	NA	NA	NA
NA	NA	Tiprl	NA	NA	NA	NA
NA	NA	Tk2	NA	NA	NA	NA
NA	NA	Tlk1	NA	NA	NA	NA
NA	NA	Tm2d2	NA	NA	NA	NA
NA	NA	Tm6sf1	NA	NA	NA	NA
NA	NA	Tma16	NA	NA	NA	NA
NA	NA	Tmc4	NA	NA	NA	NA
NA	NA	Tmcc1	NA	NA	NA	NA
NA	NA	Tmcc3	NA	NA	NA	NA
NA	NA	Tmem106c	NA	NA	NA	NA
NA	NA	Tmem116	NA	NA	NA	NA
NA	NA	Tmem123	NA	NA	NA	NA
NA	NA	Tmem126a	NA	NA	NA	NA
NA	NA	Tmem132c	NA	NA	NA	NA
NA	NA	Tmem144	NA	NA	NA	NA
NA	NA	Tmem158	NA	NA	NA	NA
NA	NA	Tmem167	NA	NA	NA	NA
NA	NA	Tmem177	NA	NA	NA	NA
NA	NA	Tmem179b	NA	NA	NA	NA
NA	NA	Tmem183a	NA	NA	NA	NA
NA	NA	Tmem191c	NA	NA	NA	NA
NA	NA	Tmem206	NA	NA	NA	NA
NA	NA	Tmem216	NA	NA	NA	NA
NA	NA	Tmem219	NA	NA	NA	NA
NA	NA	Tmem230	NA	NA	NA	NA
NA	NA	Tmem232	NA	NA	NA	NA
NA	NA	Tmem242	NA	NA	NA	NA
NA	NA	Tmem29	NA	NA	NA	NA
NA	NA	Tmem30b	NA	NA	NA	NA
NA	NA	Tmem41a	NA	NA	NA	NA
NA	NA	Tmem41b	NA	NA	NA	NA
NA	NA	Tmem5	NA	NA	NA	NA
NA	NA	Tmem64	NA	NA	NA	NA
NA	NA	Tmem70	NA	NA	NA	NA
NA	NA	Tmem74b	NA	NA	NA	NA
NA	NA	Tmprss2	NA	NA	NA	NA
NA	NA	Tmsb15l	NA	NA	NA	NA
NA	NA	Tmub1	NA	NA	NA	NA
NA	NA	Tnf	NA	NA	NA	NA
NA	NA	Tnfaip2	NA	NA	NA	NA
NA	NA	Tnfrsf19	NA	NA	NA	NA
NA	NA	Tnfsf8	NA	NA	NA	NA
NA	NA	Tnrc6a	NA	NA	NA	NA
NA	NA	Tollip	NA	NA	NA	NA
NA	NA	Tomm20	NA	NA	NA	NA
NA	NA	Tomm40	NA	NA	NA	NA
NA	NA	Tomm7	NA	NA	NA	NA
NA	NA	Top1mt	NA	NA	NA	NA
NA	NA	Tor4a	NA	NA	NA	NA
NA	NA	Tpgs2	NA	NA	NA	NA
NA	NA	Tpm2	NA	NA	NA	NA
NA	NA	Tpmt	NA	NA	NA	NA
NA	NA	Tpsb2	NA	NA	NA	NA
NA	NA	Tpx2	NA	NA	NA	NA
NA	NA	Tradd	NA	NA	NA	NA
NA	NA	Trappc1	NA	NA	NA	NA
NA	NA	Trappc13	NA	NA	NA	NA
NA	NA	Trappc5	NA	NA	NA	NA
NA	NA	Trappc6a	NA	NA	NA	NA
NA	NA	Trappc9	NA	NA	NA	NA
NA	NA	Triap1	NA	NA	NA	NA
NA	NA	Trib1	NA	NA	NA	NA
NA	NA	Trim16	NA	NA	NA	NA
NA	NA	Trim45	NA	NA	NA	NA
NA	NA	Trim8	NA	NA	NA	NA
NA	NA	Trnt1	NA	NA	NA	NA
NA	NA	Tro	NA	NA	NA	NA
NA	NA	Trpc4	NA	NA	NA	NA
NA	NA	Trub1	NA	NA	NA	NA
NA	NA	Tsen15	NA	NA	NA	NA
NA	NA	Tspan11	NA	NA	NA	NA
NA	NA	Tspan12	NA	NA	NA	NA
NA	NA	Tspan13	NA	NA	NA	NA
NA	NA	Tspan14	NA	NA	NA	NA
NA	NA	Tspan2	NA	NA	NA	NA
NA	NA	Tspo	NA	NA	NA	NA
NA	NA	Tsr3	NA	NA	NA	NA
NA	NA	Ttc14	NA	NA	NA	NA
NA	NA	Ttc4	NA	NA	NA	NA
NA	NA	Ttc7	NA	NA	NA	NA
NA	NA	Ttll1	NA	NA	NA	NA
NA	NA	Ttll10	NA	NA	NA	NA
NA	NA	Tuba1b	NA	NA	NA	NA
NA	NA	Tuba8	NA	NA	NA	NA
NA	NA	Tubb2a	NA	NA	NA	NA
NA	NA	Tube1	NA	NA	NA	NA
NA	NA	Tubg1	NA	NA	NA	NA
NA	NA	Tug1	NA	NA	NA	NA
NA	NA	Tusc1	NA	NA	NA	NA
NA	NA	Tusc2	NA	NA	NA	NA
NA	NA	Twist1	NA	NA	NA	NA
NA	NA	Txlna	NA	NA	NA	NA
NA	NA	Txn1	NA	NA	NA	NA
NA	NA	Txndc17	NA	NA	NA	NA
NA	NA	Txnrd2	NA	NA	NA	NA
NA	NA	Txnrd3	NA	NA	NA	NA
NA	NA	Tyrp1	NA	NA	NA	NA
NA	NA	Ubac2	NA	NA	NA	NA
NA	NA	Ube2a	NA	NA	NA	NA
NA	NA	Ube2d1	NA	NA	NA	NA
NA	NA	Ube2d2a	NA	NA	NA	NA
NA	NA	Ube2d3	NA	NA	NA	NA
NA	NA	Ube2e1	NA	NA	NA	NA
NA	NA	Ube2f	NA	NA	NA	NA
NA	NA	Ube2g2	NA	NA	NA	NA
NA	NA	Ube2l3	NA	NA	NA	NA
NA	NA	Ube2s	NA	NA	NA	NA
NA	NA	Ube2w	NA	NA	NA	NA
NA	NA	Ubl4	NA	NA	NA	NA
NA	NA	Ubl5	NA	NA	NA	NA
NA	NA	Ubox5	NA	NA	NA	NA
NA	NA	Ubxn2b	NA	NA	NA	NA
NA	NA	Uck1	NA	NA	NA	NA
NA	NA	Uck2	NA	NA	NA	NA
NA	NA	Ucma	NA	NA	NA	NA
NA	NA	Uevld	NA	NA	NA	NA
NA	NA	Ufc1	NA	NA	NA	NA
NA	NA	Ufm1	NA	NA	NA	NA
NA	NA	Ufsp2	NA	NA	NA	NA
NA	NA	Ugcg	NA	NA	NA	NA
NA	NA	Ugt2b38	NA	NA	NA	NA
NA	NA	Unc13b	NA	NA	NA	NA
NA	NA	Unc13c	NA	NA	NA	NA
NA	NA	Unc5d	NA	NA	NA	NA
NA	NA	Upp2	NA	NA	NA	NA
NA	NA	Uqcrb	NA	NA	NA	NA
NA	NA	Uqcrh	NA	NA	NA	NA
NA	NA	Usp15	NA	NA	NA	NA
NA	NA	Usp16	NA	NA	NA	NA
NA	NA	Usp19	NA	NA	NA	NA
NA	NA	Usp21	NA	NA	NA	NA
NA	NA	Usp31	NA	NA	NA	NA
NA	NA	Uts2	NA	NA	NA	NA
NA	NA	Uxt	NA	NA	NA	NA
NA	NA	Vamp7	NA	NA	NA	NA
NA	NA	Vapa	NA	NA	NA	NA
NA	NA	Vax2	NA	NA	NA	NA
NA	NA	Vegfb	NA	NA	NA	NA
NA	NA	Vkorc1l1	NA	NA	NA	NA
NA	NA	Vps11	NA	NA	NA	NA
NA	NA	Vps25	NA	NA	NA	NA
NA	NA	Vps26b	NA	NA	NA	NA
NA	NA	Vps29	NA	NA	NA	NA
NA	NA	Vps36	NA	NA	NA	NA
NA	NA	Vps37a	NA	NA	NA	NA
NA	NA	Vps53	NA	NA	NA	NA
NA	NA	Vstm2a	NA	NA	NA	NA
NA	NA	Vstm5	NA	NA	NA	NA
NA	NA	Vti1b	NA	NA	NA	NA
NA	NA	Vwa8	NA	NA	NA	NA
NA	NA	Wbp2nl	NA	NA	NA	NA
NA	NA	Wdfy1	NA	NA	NA	NA
NA	NA	Wdr1	NA	NA	NA	NA
NA	NA	Wdr12	NA	NA	NA	NA
NA	NA	Wdr18	NA	NA	NA	NA
NA	NA	Wdr33	NA	NA	NA	NA
NA	NA	Wdr37	NA	NA	NA	NA
NA	NA	Wdr55	NA	NA	NA	NA
NA	NA	Wdr65	NA	NA	NA	NA
NA	NA	Wdr70	NA	NA	NA	NA
NA	NA	Wdr83	NA	NA	NA	NA
NA	NA	Wdr96	NA	NA	NA	NA
NA	NA	Wfs1	NA	NA	NA	NA
NA	NA	Wnt16	NA	NA	NA	NA
NA	NA	Wnt3a	NA	NA	NA	NA
NA	NA	Wsb2	NA	NA	NA	NA
NA	NA	Wwox	NA	NA	NA	NA
NA	NA	Wwp1	NA	NA	NA	NA
NA	NA	Xlr4b	NA	NA	NA	NA
NA	NA	Xlr4c	NA	NA	NA	NA
NA	NA	Xpo4	NA	NA	NA	NA
NA	NA	Xrcc3	NA	NA	NA	NA
NA	NA	Xrcc6bp1	NA	NA	NA	NA
NA	NA	Yae1d1	NA	NA	NA	NA
NA	NA	Yars2	NA	NA	NA	NA
NA	NA	Ydjc	NA	NA	NA	NA
NA	NA	Yif1b	NA	NA	NA	NA
NA	NA	Ypel1	NA	NA	NA	NA
NA	NA	Ypel5	NA	NA	NA	NA
NA	NA	Zar1	NA	NA	NA	NA
NA	NA	Zbtb14	NA	NA	NA	NA
NA	NA	Zbtb3	NA	NA	NA	NA
NA	NA	Zbtb33	NA	NA	NA	NA
NA	NA	Zbtb4	NA	NA	NA	NA
NA	NA	Zbtb8os	NA	NA	NA	NA
NA	NA	Zc2hc1c	NA	NA	NA	NA
NA	NA	Zcchc10	NA	NA	NA	NA
NA	NA	Zdhhc14	NA	NA	NA	NA
NA	NA	Zdhhc8	NA	NA	NA	NA
NA	NA	Zfand3	NA	NA	NA	NA
NA	NA	Zfp109	NA	NA	NA	NA
NA	NA	Zfp120	NA	NA	NA	NA
NA	NA	Zfp248	NA	NA	NA	NA
NA	NA	Zfp322a	NA	NA	NA	NA
NA	NA	Zfp324	NA	NA	NA	NA
NA	NA	Zfp346	NA	NA	NA	NA
NA	NA	Zfp35	NA	NA	NA	NA
NA	NA	Zfp358	NA	NA	NA	NA
NA	NA	Zfp367	NA	NA	NA	NA
NA	NA	Zfp37	NA	NA	NA	NA
NA	NA	Zfp46	NA	NA	NA	NA
NA	NA	Zfp580	NA	NA	NA	NA
NA	NA	Zfp593	NA	NA	NA	NA
NA	NA	Zfp605	NA	NA	NA	NA
NA	NA	Zfp606	NA	NA	NA	NA
NA	NA	Zfp618	NA	NA	NA	NA
NA	NA	Zfp688	NA	NA	NA	NA
NA	NA	Zfp703	NA	NA	NA	NA
NA	NA	Zfp706	NA	NA	NA	NA
NA	NA	Zfp804a	NA	NA	NA	NA
NA	NA	Zfp90	NA	NA	NA	NA
NA	NA	Zfp931	NA	NA	NA	NA
NA	NA	Zfp942	NA	NA	NA	NA
NA	NA	Zfp943	NA	NA	NA	NA
NA	NA	Zfp944	NA	NA	NA	NA
NA	NA	Zfp946	NA	NA	NA	NA
NA	NA	Zfy2	NA	NA	NA	NA
NA	NA	Zg16	NA	NA	NA	NA
NA	NA	Zkscan14	NA	NA	NA	NA
NA	NA	Zmat2	NA	NA	NA	NA
NA	NA	Zmat5	NA	NA	NA	NA
NA	NA	Znf41-ps	NA	NA	NA	NA
NA	NA	Znrf1	NA	NA	NA	NA
NA	NA	Zranb3	NA	NA	NA	NA
NA	NA	Zzef1	NA	NA	NA	NA
