# Supplementary material for: Digital expression profiling of the compartmentalized translatome of Purkinje neurons
Source: HighWire-hosted journal article supplement (doi:10.1101/gr.164095.113), 2014-06-05
Supplement: Supplemental_Table.S5.xlsx [file Supplemental_Table.S5.xlsx]

## Sheet: biological process
GO Term	Description	P-value	FDR q-value	Enrichment	N	B	n	b	Genes
GO:0006811	ion transport	9.63e-35	8.61e-31	2.21	6963	289	1950	179	[Atp5j2 - atp synthase, h+ transporting, mitochondrial fo complex, subunit f2, Clcn4 - chloride channel 4, P2rx4 - purinergic receptor p2x, ligand-gated ion channel 4, Slc4a4 - solute carrier family 4, sodium bicarbonate cotransporter, member 4, Mcoln1 - mucolipin 1, Atp5i - atp synthase, h+ transporting, mitochondrial fo complex, subunit e, Acsl4 - acyl-coa synthetase long-chain family member 4,…
GO:0022610	biological adhesion	3.41e-29	1.52e-25	2.29	6963	215	1950	138	[Podxl2 - podocalyxin-like 2, Vwf - von willebrand factor, Pcdh7 - protocadherin 7, Ddr1 - discoidin domain receptor tyrosine kinase 1, Sdc3 - syndecan 3, Thra - thyroid hormone receptor alpha, Ppap2b - phosphatidic acid phosphatase type 2b, Cfdp1 - craniofacial development protein 1, Vezt - vezatin, adherens junctions transmembrane protein, Srcin1 - src kinase signaling inhibitor 1, Nptn - neuro…
GO:0007155	cell adhesion	3.41e-29	1.02e-25	2.29	6963	215	1950	138	[Podxl2 - podocalyxin-like 2, Vwf - von willebrand factor, Pcdh7 - protocadherin 7, Ddr1 - discoidin domain receptor tyrosine kinase 1, Sdc3 - syndecan 3, Thra - thyroid hormone receptor alpha, Ppap2b - phosphatidic acid phosphatase type 2b, Cfdp1 - craniofacial development protein 1, Vezt - vezatin, adherens junctions transmembrane protein, Srcin1 - src kinase signaling inhibitor 1, Nptn - neuro…
GO:0044765	single-organism transport	2.03e-27	4.54e-24	1.57	6963	862	1950	380	[Arhgap21 - rho gtpase activating protein 21, Lman1 - lectin, mannose-binding, 1, Clcn4 - chloride channel 4, Ddr1 - discoidin domain receptor tyrosine kinase 1, P2rx4 - purinergic receptor p2x, ligand-gated ion channel 4, Slc4a4 - solute carrier family 4, sodium bicarbonate cotransporter, member 4, Timm21 - translocase of inner mitochondrial membrane 21 homolog (yeast), Sv2c - synaptic vesicle g…
GO:0030001	metal ion transport	8.36e-25	1.5e-21	2.42	6963	152	1950	103	[P2rx4 - purinergic receptor p2x, ligand-gated ion channel 4, Slc4a4 - solute carrier family 4, sodium bicarbonate cotransporter, member 4, Mcoln1 - mucolipin 1, Selk - selenoprotein k, Slc4a8 - solute carrier family 4, sodium bicarbonate cotransporter, member 8, Slc20a1 - solute carrier family 20 (phosphate transporter), member 1, Slc39a1 - solute carrier family 39 (zinc transporter), member 1, …
GO:0006812	cation transport	1.07e-23	1.6e-20	2.15	6963	216	1950	130	[Atp5j2 - atp synthase, h+ transporting, mitochondrial fo complex, subunit f2, P2rx4 - purinergic receptor p2x, ligand-gated ion channel 4, Slc4a4 - solute carrier family 4, sodium bicarbonate cotransporter, member 4, Atp5i - atp synthase, h+ transporting, mitochondrial fo complex, subunit e, Mcoln1 - mucolipin 1, Selk - selenoprotein k, Atp6v0b - atpase, h+ transporting, lysosomal v0 subunit b, …
GO:0006810	transport	2.62e-21	3.35e-18	1.41	6963	1181	1950	467	[Clcn4 - chloride channel 4, Ddr1 - discoidin domain receptor tyrosine kinase 1, Slc4a4 - solute carrier family 4, sodium bicarbonate cotransporter, member 4, Slc6a13 - solute carrier family 6 (neurotransmitter transporter, gaba), member 13, Tmed4 - transmembrane emp24 protein transport domain containing 4, Atp6v0b - atpase, h+ transporting, lysosomal v0 subunit b, Mybbp1a - myb binding protein (…
GO:0051234	establishment of localization	4.22e-21	4.72e-18	1.4	6963	1205	1950	474	[Clcn4 - chloride channel 4, Ddr1 - discoidin domain receptor tyrosine kinase 1, Slc4a4 - solute carrier family 4, sodium bicarbonate cotransporter, member 4, Slc6a13 - solute carrier family 6 (neurotransmitter transporter, gaba), member 13, Tmed4 - transmembrane emp24 protein transport domain containing 4, Atp6v0b - atpase, h+ transporting, lysosomal v0 subunit b, Mybbp1a - myb binding protein (…
GO:0055085	transmembrane transport	1.77e-19	1.76e-16	2.09	6963	195	1950	114	[P2rx4 - purinergic receptor p2x, ligand-gated ion channel 4, Timm21 - translocase of inner mitochondrial membrane 21 homolog (yeast), Atp5i - atp synthase, h+ transporting, mitochondrial fo complex, subunit e, Sec63 - sec63 homolog (s. cerevisiae), Atp6v0b - atpase, h+ transporting, lysosomal v0 subunit b, Slc36a1 - solute carrier family 36 (proton/amino acid symporter), member 1, Slc39a1 - solu…
GO:0044057	regulation of system process	9.37e-19	8.38e-16	1.94	6963	247	1950	134	[Hmgcr - 3-hydroxy-3-methylglutaryl-coa reductase, Nf1 - neurofibromin 1, P2rx4 - purinergic receptor p2x, ligand-gated ion channel 4, Grm8 - glutamate receptor, metabotropic 8, Bmpr2 - bone morphogenetic protein receptor, type ii (serine/threonine kinase), Hopx - hop homeobox, Thra - thyroid hormone receptor alpha, Ywhag - tyrosine 3-monooxygenase/tryptophan 5-monooxygenase activation protein, g…
GO:0034220	ion transmembrane transport	5.01e-18	4.08e-15	2.25	6963	138	1950	87	[Slc23a2 - solute carrier family 23 (nucleobase transporters), member 2, Slc39a14 - solute carrier family 39 (zinc transporter), member 14, P2rx4 - purinergic receptor p2x, ligand-gated ion channel 4, Slc30a5 - solute carrier family 30 (zinc transporter), member 5, Atp5i - atp synthase, h+ transporting, mitochondrial fo complex, subunit e, Slc1a2 - solute carrier family 1 (glial high affinity glu…
GO:0019725	cellular homeostasis	7.2e-18	5.37e-15	1.83	6963	295	1950	151	[Txndc15 - thioredoxin domain containing 15, Grid2 - glutamate receptor, ionotropic, delta 2, P2rx4 - purinergic receptor p2x, ligand-gated ion channel 4, Tmx1 - thioredoxin-related transmembrane protein 1, Mcoln1 - mucolipin 1, Nptn - neuroplastin, Wwp2 - ww domain containing e3 ubiquitin protein ligase 2, Cyba - cytochrome b-245, alpha polypeptide, Accn2 - amiloride-sensitive cation channel 2, …
GO:0048878	chemical homeostasis	2.08e-17	1.43e-14	1.79	6963	316	1950	158	[Usf2 - upstream transcription factor 2, c-fos interacting, Grid2 - glutamate receptor, ionotropic, delta 2, P2rx4 - purinergic receptor p2x, ligand-gated ion channel 4, Slc4a4 - solute carrier family 4, sodium bicarbonate cotransporter, member 4, Mcoln1 - mucolipin 1, Nptn - neuroplastin, Apoa5 - apolipoprotein a-v, Wwp2 - ww domain containing e3 ubiquitin protein ligase 2, Cyba - cytochrome b-2…
GO:0050801	ion homeostasis	2.9e-17	1.85e-14	1.89	6963	247	1950	131	[Grid2 - glutamate receptor, ionotropic, delta 2, P2rx4 - purinergic receptor p2x, ligand-gated ion channel 4, Slc4a4 - solute carrier family 4, sodium bicarbonate cotransporter, member 4, Mcoln1 - mucolipin 1, Nptn - neuroplastin, Wwp2 - ww domain containing e3 ubiquitin protein ligase 2, Accn2 - amiloride-sensitive cation channel 2, neuronal, Adora1 - adenosine a1 receptor, Slc39a13 - solute ca…
GO:0006873	cellular ion homeostasis	7.75e-17	4.62e-14	1.93	6963	224	1950	121	[Grid2 - glutamate receptor, ionotropic, delta 2, P2rx4 - purinergic receptor p2x, ligand-gated ion channel 4, Mcoln1 - mucolipin 1, Nptn - neuroplastin, Wwp2 - ww domain containing e3 ubiquitin protein ligase 2, Accn2 - amiloride-sensitive cation channel 2, neuronal, Adora1 - adenosine a1 receptor, Slc39a13 - solute carrier family 39 (zinc transporter), member 13, Accn1 - amiloride-sensitive cat…
GO:0016337	cell-cell adhesion	1.76e-16	9.87e-14	2.33	6963	112	1950	73	[Podxl2 - podocalyxin-like 2, Pcdh7 - protocadherin 7, Adam9 - adam metallopeptidase domain 9, Tyro3 - tyro3 protein tyrosine kinase, Thra - thyroid hormone receptor alpha, Ppap2b - phosphatidic acid phosphatase type 2b, Vezt - vezatin, adherens junctions transmembrane protein, Nptn - neuroplastin, Odz2 - odz, odd oz/ten-m homolog 2 (drosophila), Src - v-src sarcoma (schmidt-ruppin a-2) viral onc…
GO:0055082	cellular chemical homeostasis	2.63e-16	1.39e-13	1.86	6963	247	1950	129	[Grid2 - glutamate receptor, ionotropic, delta 2, P2rx4 - purinergic receptor p2x, ligand-gated ion channel 4, Mcoln1 - mucolipin 1, Nptn - neuroplastin, Wwp2 - ww domain containing e3 ubiquitin protein ligase 2, Cyba - cytochrome b-245, alpha polypeptide, Accn2 - amiloride-sensitive cation channel 2, neuronal, Adora1 - adenosine a1 receptor, Slc39a13 - solute carrier family 39 (zinc transporter)…
GO:0031644	regulation of neurological system process	4.09e-16	2.03e-13	2.09	6963	159	1950	93	[Nf1 - neurofibromin 1, Syp - synaptophysin, Grm8 - glutamate receptor, metabotropic 8, Ctss - cathepsin s, Ywhag - tyrosine 3-monooxygenase/tryptophan 5-monooxygenase activation protein, gamma polypeptide, Lrp8 - low density lipoprotein receptor-related protein 8, apolipoprotein e receptor, Kcnc3 - potassium voltage gated channel, shaw-related subfamily, member 3, Nptn - neuroplastin, Slc6a1 - s…
GO:0050877	neurological system process	7.73e-16	3.64e-13	1.85	6963	247	1950	128	[Hmgcr - 3-hydroxy-3-methylglutaryl-coa reductase, Nf1 - neurofibromin 1, Mme - membrane metallo-endopeptidase, Gng13 - guanine nucleotide binding protein (g protein), gamma 13, P2rx4 - purinergic receptor p2x, ligand-gated ion channel 4, Grm8 - glutamate receptor, metabotropic 8, Adcy5 - adenylate cyclase 5, Thra - thyroid hormone receptor alpha, B3gnt2 - udp-glcnac:betagal beta-1,3-n-acetylgluc…
GO:0007166	cell surface receptor signaling pathway	8.77e-16	3.92e-13	1.6	6963	467	1950	209	[Arhgef12 - rho guanine nucleotide exchange factor (gef) 12, Ncstn - nicastrin, Adam10 - adam metallopeptidase domain 10, Ddr1 - discoidin domain receptor tyrosine kinase 1, P2rx4 - purinergic receptor p2x, ligand-gated ion channel 4, Grm8 - glutamate receptor, metabotropic 8, Fgfr3 - fibroblast growth factor receptor 3, Epha7 - eph receptor a7, Ptprj - protein tyrosine phosphatase, receptor type…
GO:0032879	regulation of localization	1.11e-15	4.73e-13	1.49	6963	653	1950	273	[Hmgcr - 3-hydroxy-3-methylglutaryl-coa reductase, Creb3 - camp responsive element binding protein 3, Cdk5r2 - cyclin-dependent kinase 5, regulatory subunit 2 (p39), Adam10 - adam metallopeptidase domain 10, Grm8 - glutamate receptor, metabotropic 8, P2rx4 - purinergic receptor p2x, ligand-gated ion channel 4, Plcb4 - phospholipase c, beta 4, Adcyap1r1 - adenylate cyclase activating polypeptide 1…
GO:0072511	divalent inorganic cation transport	5.74e-15	2.33e-12	2.52	6963	78	1950	55	[Slc39a14 - solute carrier family 39 (zinc transporter), member 14, Slc30a5 - solute carrier family 30 (zinc transporter), member 5, P2rx4 - purinergic receptor p2x, ligand-gated ion channel 4, Mcoln1 - mucolipin 1, Ero1l - ero1-like (s. cerevisiae), Nipa1 - non imprinted in prader-willi/angelman syndrome 1, Selk - selenoprotein k, Grin1 - glutamate receptor, ionotropic, n-methyl d-aspartate 1, A…
GO:0044700	single organism signaling	6.69e-15	2.6e-12	2.15	6963	131	1950	79	[Grm8 - glutamate receptor, metabotropic 8, Grid2 - glutamate receptor, ionotropic, delta 2, Acp2 - acid phosphatase 2, lysosomal, Fgfr3 - fibroblast growth factor receptor 3, Sdc1 - syndecan 1, Plat - plasminogen activator, tissue, Grik4 - glutamate receptor, ionotropic, kainate 4, Exoc4 - exocyst complex component 4, Grin1 - glutamate receptor, ionotropic, n-methyl d-aspartate 1, Ryr2 - ryanodi…
GO:0023052	signaling	6.69e-15	2.49e-12	2.15	6963	131	1950	79	[Grid2 - glutamate receptor, ionotropic, delta 2, Grm8 - glutamate receptor, metabotropic 8, Acp2 - acid phosphatase 2, lysosomal, Fgfr3 - fibroblast growth factor receptor 3, Sdc1 - syndecan 1, Plat - plasminogen activator, tissue, Grik4 - glutamate receptor, ionotropic, kainate 4, Exoc4 - exocyst complex component 4, Grin1 - glutamate receptor, ionotropic, n-methyl d-aspartate 1, Ryr2 - ryanodi…
GO:0042391	regulation of membrane potential	1.3e-14	4.64e-12	2.27	6963	107	1950	68	[Kcnd2 - potassium voltage-gated channel, shal-related subfamily, member 2, P2rx4 - purinergic receptor p2x, ligand-gated ion channel 4, Grid2 - glutamate receptor, ionotropic, delta 2, Wwp2 - ww domain containing e3 ubiquitin protein ligase 2, Dlg1 - discs, large homolog 1 (drosophila), Cnr1 - cannabinoid receptor 1 (brain), Grin1 - glutamate receptor, ionotropic, n-methyl d-aspartate 1, Accn2 -…
GO:0070838	divalent metal ion transport	1.47e-14	5.07e-12	2.5	6963	77	1950	54	[Slc39a14 - solute carrier family 39 (zinc transporter), member 14, P2rx4 - purinergic receptor p2x, ligand-gated ion channel 4, Mcoln1 - mucolipin 1, Ero1l - ero1-like (s. cerevisiae), Nipa1 - non imprinted in prader-willi/angelman syndrome 1, Selk - selenoprotein k, Grin1 - glutamate receptor, ionotropic, n-methyl d-aspartate 1, Ryr2 - ryanodine receptor 2, cardiac, Accn2 - amiloride-sensitive …
GO:0050804	regulation of synaptic transmission	1.73e-14	5.72e-12	2.09	6963	142	1950	83	[Nf1 - neurofibromin 1, Syp - synaptophysin, Grm8 - glutamate receptor, metabotropic 8, Ywhag - tyrosine 3-monooxygenase/tryptophan 5-monooxygenase activation protein, gamma polypeptide, Lrp8 - low density lipoprotein receptor-related protein 8, apolipoprotein e receptor, Kcnc3 - potassium voltage gated channel, shaw-related subfamily, member 3, Slc6a1 - solute carrier family 6 (neurotransmitter …
GO:0051969	regulation of transmission of nerve impulse	2.22e-14	7.09e-12	2.04	6963	152	1950	87	[Nf1 - neurofibromin 1, Syp - synaptophysin, Grm8 - glutamate receptor, metabotropic 8, Ywhag - tyrosine 3-monooxygenase/tryptophan 5-monooxygenase activation protein, gamma polypeptide, Lrp8 - low density lipoprotein receptor-related protein 8, apolipoprotein e receptor, Kcnc3 - potassium voltage gated channel, shaw-related subfamily, member 3, Nptn - neuroplastin, Slc6a1 - solute carrier family…
GO:0006820	anion transport	3.62e-14	1.12e-11	2.34	6963	93	1950	61	[Slc23a2 - solute carrier family 23 (nucleobase transporters), member 2, Clcn4 - chloride channel 4, Slc4a4 - solute carrier family 4, sodium bicarbonate cotransporter, member 4, Cln8 - ceroid-lipofuscinosis, neuronal 8 (epilepsy, progressive with mental retardation), Acsl4 - acyl-coa synthetase long-chain family member 4, Slc1a2 - solute carrier family 1 (glial high affinity glutamate transporte…
GO:0006814	sodium ion transport	4.96e-14	1.48e-11	3.1	6963	38	1950	33	[Scn4b - sodium channel, voltage-gated, type iv, beta, Slc23a2 - solute carrier family 23 (nucleobase transporters), member 2, Slc4a4 - solute carrier family 4, sodium bicarbonate cotransporter, member 4, Slc8a1 - solute carrier family 8 (sodium/calcium exchanger), member 1, Slc32a1 - solute carrier family 32 (gaba vesicular transporter), member 1, Slc1a2 - solute carrier family 1 (glial high aff…
GO:0065008	regulation of biological quality	1.11e-13	3.21e-11	1.39	6963	850	1950	331	[Arhgap21 - rho gtpase activating protein 21, Txndc15 - thioredoxin domain containing 15, Vwf - von willebrand factor, Ncstn - nicastrin, Creb3 - camp responsive element binding protein 3, Ddr1 - discoidin domain receptor tyrosine kinase 1, P2rx4 - purinergic receptor p2x, ligand-gated ion channel 4, Grid2 - glutamate receptor, ionotropic, delta 2, Slc4a4 - solute carrier family 4, sodium bicarbo…
GO:0051049	regulation of transport	1.16e-13	3.25e-11	1.53	6963	491	1950	211	[Hmgcr - 3-hydroxy-3-methylglutaryl-coa reductase, Creb3 - camp responsive element binding protein 3, Cdk5r2 - cyclin-dependent kinase 5, regulatory subunit 2 (p39), Grm8 - glutamate receptor, metabotropic 8, Plcb4 - phospholipase c, beta 4, P2rx4 - purinergic receptor p2x, ligand-gated ion channel 4, Adcyap1r1 - adenylate cyclase activating polypeptide 1 receptor 1, Slc6a1 - solute carrier famil…
GO:0006816	calcium ion transport	1.2e-13	3.24e-11	2.56	6963	67	1950	48	[Cacnb3 - calcium channel, voltage-dependent, beta 3 subunit, Camk2b - calcium/calmodulin-dependent protein kinase ii beta, Cacna1g - calcium channel, voltage-dependent, t type, alpha 1g subunit, P2rx4 - purinergic receptor p2x, ligand-gated ion channel 4, Slc8a1 - solute carrier family 8 (sodium/calcium exchanger), member 1, Itgav - integrin, alpha v, Mcoln1 - mucolipin 1, Ero1l - ero1-like (s. …
GO:0051239	regulation of multicellular organismal process	1.28e-13	3.36e-11	1.41	6963	765	1950	303	[Hmgcr - 3-hydroxy-3-methylglutaryl-coa reductase, Bai3 - brain-specific angiogenesis inhibitor 3, Adam10 - adam metallopeptidase domain 10, Grm8 - glutamate receptor, metabotropic 8, P2rx4 - purinergic receptor p2x, ligand-gated ion channel 4, Grid2 - glutamate receptor, ionotropic, delta 2, Hopx - hop homeobox, Cpe - carboxypeptidase e, Fgfr3 - fibroblast growth factor receptor 3, Cbln1 - cereb…
GO:0043269	regulation of ion transport	1.46e-13	3.73e-11	1.97	6963	163	1950	90	[Creb3 - camp responsive element binding protein 3, Akt2 - v-akt murine thymoma viral oncogene homolog 2, Plcb4 - phospholipase c, beta 4, P2rx4 - purinergic receptor p2x, ligand-gated ion channel 4, Ahcyl1 - adenosylhomocysteinase-like 1, Adcyap1r1 - adenylate cyclase activating polypeptide 1 receptor 1, Acsl4 - acyl-coa synthetase long-chain family member 4, Slc6a1 - solute carrier family 6 (ne…
GO:0042592	homeostatic process	1.75e-13	4.36e-11	1.57	6963	438	1950	192	[Txndc15 - thioredoxin domain containing 15, Usf2 - upstream transcription factor 2, c-fos interacting, Ncstn - nicastrin, P2rx4 - purinergic receptor p2x, ligand-gated ion channel 4, Grid2 - glutamate receptor, ionotropic, delta 2, Slc4a4 - solute carrier family 4, sodium bicarbonate cotransporter, member 4, Mcoln1 - mucolipin 1, Tmx1 - thioredoxin-related transmembrane protein 1, Flt3 - fms-rel…
GO:0003008	system process	8.46e-13	2.05e-10	1.64	6963	331	1950	152	[Hmgcr - 3-hydroxy-3-methylglutaryl-coa reductase, Nf1 - neurofibromin 1, Gng13 - guanine nucleotide binding protein (g protein), gamma 13, Mme - membrane metallo-endopeptidase, P2rx4 - purinergic receptor p2x, ligand-gated ion channel 4, Grm8 - glutamate receptor, metabotropic 8, Adcy5 - adenylate cyclase 5, Thra - thyroid hormone receptor alpha, B3gnt2 - udp-glcnac:betagal beta-1,3-n-acetylgluc…
GO:0007267	cell-cell signaling	9.09e-13	2.14e-10	2.12	6963	116	1950	69	[Grm8 - glutamate receptor, metabotropic 8, Grid2 - glutamate receptor, ionotropic, delta 2, Acp2 - acid phosphatase 2, lysosomal, Fgfr3 - fibroblast growth factor receptor 3, Sdc1 - syndecan 1, Plat - plasminogen activator, tissue, Grik4 - glutamate receptor, ionotropic, kainate 4, Exoc4 - exocyst complex component 4, Grin1 - glutamate receptor, ionotropic, n-methyl d-aspartate 1, Ryr2 - ryanodi…
GO:0040011	locomotion	4e-12	9.17e-10	1.68	6963	281	1950	132	[Cdc42bpb - cdc42 binding protein kinase beta (dmpk-like), Cdk5r2 - cyclin-dependent kinase 5, regulatory subunit 2 (p39), Ddr1 - discoidin domain receptor tyrosine kinase 1, Nr2f2 - nuclear receptor subfamily 2, group f, member 2, Fmnl1 - formin-like 1, B3gnt2 - udp-glcnac:betagal beta-1,3-n-acetylglucosaminyltransferase 2, Epha7 - eph receptor a7, Ptprj - protein tyrosine phosphatase, receptor …
GO:0007186	G-protein coupled receptor signaling pathway	5.23e-12	1.17e-09	2.1	6963	112	1950	66	[Adrbk1 - adrenergic, beta, receptor kinase 1, Arhgef12 - rho guanine nucleotide exchange factor (gef) 12, Adcy2 - adenylate cyclase 2 (brain), Gng13 - guanine nucleotide binding protein (g protein), gamma 13, Gal - galanin prepropeptide, Adcy5 - adenylate cyclase 5, Grm8 - glutamate receptor, metabotropic 8, Cerk - ceramide kinase, Gnal - guanine nucleotide binding protein, alpha stimulating, ol…
GO:0010646	regulation of cell communication	6.48e-12	1.41e-09	1.36	6963	854	1950	325	[Hmgcr - 3-hydroxy-3-methylglutaryl-coa reductase, Gpr158 - g protein-coupled receptor 158, P2rx4 - purinergic receptor p2x, ligand-gated ion channel 4, Grm8 - glutamate receptor, metabotropic 8, Arl2bp - adp-ribosylation factor-like 2 binding protein, Fgfr3 - fibroblast growth factor receptor 3, Slc6a1 - solute carrier family 6 (neurotransmitter transporter, gaba), member 1, Epha7 - eph receptor…
GO:0007156	homophilic cell adhesion	6.67e-12	1.42e-09	2.98	6963	36	1950	30	[Pcdhb19 - protocadherin beta 19, Pcdh7 - protocadherin 7, Cdh13 - cadherin 13, Cdh18 - cadherin 18, type 2, Nptn - neuroplastin, Pcdh17 - protocadherin 17, Robo1 - roundabout homolog 1 (drosophila), Pcdh20 - protocadherin 20, Amigo1 - adhesion molecule with ig like domain 1, Pcdhb20 - protocadherin beta 20, Cdh12 - cadherin 12, Pcdha6 - protocadherin alpha 6, L1cam - l1 cell adhesion molecule, C…
GO:0044699	single-organism process	7.83e-12	1.63e-09	1.12	6963	3713	1950	1166	[A2m - alpha-2-macroglobulin, Clcn4 - chloride channel 4, Acadm - acyl-coa dehydrogenase, c-4 to c-12 straight chain, Creb3 - camp responsive element binding protein 3, Gpr158 - g protein-coupled receptor 158, Grm8 - glutamate receptor, metabotropic 8, Acp2 - acid phosphatase 2, lysosomal, Hopx - hop homeobox, Slc6a13 - solute carrier family 6 (neurotransmitter transporter, gaba), member 13, Tial…
GO:0051899	membrane depolarization	8.75e-12	1.78e-09	2.91	6963	38	1950	31	[Scn4b - sodium channel, voltage-gated, type iv, beta, Sez6 - seizure related 6 homolog (mouse), Cacna1g - calcium channel, voltage-dependent, t type, alpha 1g subunit, P2rx4 - purinergic receptor p2x, ligand-gated ion channel 4, Grid2 - glutamate receptor, ionotropic, delta 2, Shank1 - sh3 and multiple ankyrin repeat domains 1, Dmpk - dystrophia myotonica-protein kinase, Grin1 - glutamate recept…
GO:0023051	regulation of signaling	1.61e-11	3.21e-09	1.35	6963	850	1950	322	[Hmgcr - 3-hydroxy-3-methylglutaryl-coa reductase, Gpr158 - g protein-coupled receptor 158, P2rx4 - purinergic receptor p2x, ligand-gated ion channel 4, Grm8 - glutamate receptor, metabotropic 8, Arl2bp - adp-ribosylation factor-like 2 binding protein, Fgfr3 - fibroblast growth factor receptor 3, Slc6a1 - solute carrier family 6 (neurotransmitter transporter, gaba), member 1, Epha7 - eph receptor…
GO:0006486	protein glycosylation	9.95e-11	1.94e-08	2.31	6963	71	1950	46	[Pomgnt1 - protein o-linked mannose beta1,2-n-acetylglucosaminyltransferase, B3gat1 - beta-1,3-glucuronyltransferase 1 (glucuronosyltransferase p), B3gnt1 - udp-glcnac:betagal beta-1,3-n-acetylglucosaminyltransferase 1, B4galt3 - udp-gal:betaglcnac beta 1,4-galactosyltransferase, polypeptide 3, Galnt1 - udp-n-acetyl-alpha-d-galactosamine:polypeptide n-acetylgalactosaminyltransferase 1 (galnac-t1)…
GO:0043413	macromolecule glycosylation	9.95e-11	1.89e-08	2.31	6963	71	1950	46	[Pomgnt1 - protein o-linked mannose beta1,2-n-acetylglucosaminyltransferase, B3gat1 - beta-1,3-glucuronyltransferase 1 (glucuronosyltransferase p), B3gnt1 - udp-glcnac:betagal beta-1,3-n-acetylglucosaminyltransferase 1, B4galt3 - udp-gal:betaglcnac beta 1,4-galactosyltransferase, polypeptide 3, Galnt1 - udp-n-acetyl-alpha-d-galactosamine:polypeptide n-acetylgalactosaminyltransferase 1 (galnac-t1)…
GO:0032502	developmental process	1.18e-10	2.19e-08	1.23	6963	1574	1950	542	[Hmgcr - 3-hydroxy-3-methylglutaryl-coa reductase, A2m - alpha-2-macroglobulin, Cdk5r2 - cyclin-dependent kinase 5, regulatory subunit 2 (p39), Ddr1 - discoidin domain receptor tyrosine kinase 1, Acadm - acyl-coa dehydrogenase, c-4 to c-12 straight chain, Acp2 - acid phosphatase 2, lysosomal, Hopx - hop homeobox, Plcd3 - phospholipase c, delta 3, Cpe - carboxypeptidase e, Adcyap1r1 - adenylate cy…
GO:0070085	glycosylation	1.72e-10	3.15e-08	2.27	6963	74	1950	47	[Pomgnt1 - protein o-linked mannose beta1,2-n-acetylglucosaminyltransferase, B3gat1 - beta-1,3-glucuronyltransferase 1 (glucuronosyltransferase p), B3gnt1 - udp-glcnac:betagal beta-1,3-n-acetylglucosaminyltransferase 1, Galnt1 - udp-n-acetyl-alpha-d-galactosamine:polypeptide n-acetylgalactosaminyltransferase 1 (galnac-t1), B4galt3 - udp-gal:betaglcnac beta 1,4-galactosyltransferase, polypeptide 3…
GO:0015672	monovalent inorganic cation transport	1.75e-10	3.13e-08	2.1	6963	97	1950	57	[Slc23a2 - solute carrier family 23 (nucleobase transporters), member 2, Atp5j2 - atp synthase, h+ transporting, mitochondrial fo complex, subunit f2, Kcnd2 - potassium voltage-gated channel, shal-related subfamily, member 2, Slc4a4 - solute carrier family 4, sodium bicarbonate cotransporter, member 4, Atp5i - atp synthase, h+ transporting, mitochondrial fo complex, subunit e, Slc1a2 - solute car…
GO:0044707	single-multicellular organism process	2.01e-10	3.53e-08	1.36	6963	756	1950	287	[Hmgcr - 3-hydroxy-3-methylglutaryl-coa reductase, Vwf - von willebrand factor, Acadm - acyl-coa dehydrogenase, c-4 to c-12 straight chain, Ddr1 - discoidin domain receptor tyrosine kinase 1, Grm8 - glutamate receptor, metabotropic 8, P2rx4 - purinergic receptor p2x, ligand-gated ion channel 4, Adcyap1r1 - adenylate cyclase activating polypeptide 1 receptor 1, Fgfr3 - fibroblast growth factor rec…
GO:0050808	synapse organization	2.33e-10	4e-08	2.44	6963	57	1950	39	[Il1rapl1 - interleukin 1 receptor accessory protein-like 1, Shank1 - sh3 and multiple ankyrin repeat domains 1, Pdzrn3 - pdz domain containing ring finger 3, Lrrtm4 - leucine rich repeat transmembrane neuronal 4, Col4a1 - collagen, type iv, alpha 1, Ntrk2 - neurotrophic tyrosine kinase, receptor, type 2, Map1b - microtubule-associated protein 1b, Dnaja3 - dnaj (hsp40) homolog, subfamily a, membe…
GO:0032501	multicellular organismal process	2.56e-10	4.32e-08	1.35	6963	773	1950	292	[Hmgcr - 3-hydroxy-3-methylglutaryl-coa reductase, Vwf - von willebrand factor, Acadm - acyl-coa dehydrogenase, c-4 to c-12 straight chain, Ddr1 - discoidin domain receptor tyrosine kinase 1, P2rx4 - purinergic receptor p2x, ligand-gated ion channel 4, Grm8 - glutamate receptor, metabotropic 8, Adcyap1r1 - adenylate cyclase activating polypeptide 1 receptor 1, B3gnt2 - udp-glcnac:betagal beta-1,3…
GO:0070588	calcium ion transmembrane transport	2.57e-10	4.25e-08	2.8	6963	37	1950	29	[Cacna1g - calcium channel, voltage-dependent, t type, alpha 1g subunit, Slc8a1 - solute carrier family 8 (sodium/calcium exchanger), member 1, Itgav - integrin, alpha v, Grin1 - glutamate receptor, ionotropic, n-methyl d-aspartate 1, Cacng2 - calcium channel, voltage-dependent, gamma subunit 2, Accn2 - amiloride-sensitive cation channel 2, neuronal, Ryr2 - ryanodine receptor 2, cardiac, Asph - a…
GO:0044708	single-organism behavior	2.83e-10	4.61e-08	1.72	6963	210	1950	101	[Hmgcr - 3-hydroxy-3-methylglutaryl-coa reductase, Nf1 - neurofibromin 1, Adcy5 - adenylate cyclase 5, Thra - thyroid hormone receptor alpha, Slc6a1 - solute carrier family 6 (neurotransmitter transporter, gaba), member 1, Ephb2 - eph receptor b2, Ntrk2 - neurotrophic tyrosine kinase, receptor, type 2, Sgk196 - protein kinase-like protein sgk196, Adcy1 - adenylate cyclase 1 (brain), Cntn2 - conta…
GO:0007154	cell communication	3.21e-10	5.12e-08	1.72	6963	205	1950	99	[Nf1 - neurofibromin 1, Usf2 - upstream transcription factor 2, c-fos interacting, Grm8 - glutamate receptor, metabotropic 8, Grid2 - glutamate receptor, ionotropic, delta 2, Bmpr2 - bone morphogenetic protein receptor, type ii (serine/threonine kinase), Acp2 - acid phosphatase 2, lysosomal, Fgfr3 - fibroblast growth factor receptor 3, Plat - plasminogen activator, tissue, Mybbp1a - myb binding p…
GO:0007268	synaptic transmission	4.71e-10	7.4e-08	2.13	6963	87	1950	52	[Grid2 - glutamate receptor, ionotropic, delta 2, Grm8 - glutamate receptor, metabotropic 8, Acp2 - acid phosphatase 2, lysosomal, Plat - plasminogen activator, tissue, Grik4 - glutamate receptor, ionotropic, kainate 4, Exoc4 - exocyst complex component 4, Grin1 - glutamate receptor, ionotropic, n-methyl d-aspartate 1, Grm4 - glutamate receptor, metabotropic 4, Slc17a7 - solute carrier family 17 …
GO:0015711	organic anion transport	5.49e-10	8.46e-08	2.28	6963	69	1950	44	[Slc23a2 - solute carrier family 23 (nucleobase transporters), member 2, Slc7a10 - solute carrier family 7 (neutral amino acid transporter light chain, asc system), member 10, Arl6ip5 - adp-ribosylation-like factor 6 interacting protein 5, Slc35b2 - solute carrier family 35, member b2, Slc27a1 - solute carrier family 27 (fatty acid transporter), member 1, Slc4a4 - solute carrier family 4, sodium …
GO:0007165	signal transduction	8.29e-10	1.26e-07	1.28	6963	1034	1950	372	[Arhgap21 - rho gtpase activating protein 21, Arhgef12 - rho guanine nucleotide exchange factor (gef) 12, Ncstn - nicastrin, Adam10 - adam metallopeptidase domain 10, Ddr1 - discoidin domain receptor tyrosine kinase 1, P2rx4 - purinergic receptor p2x, ligand-gated ion channel 4, Plcb4 - phospholipase c, beta 4, Grm8 - glutamate receptor, metabotropic 8, Adcyap1r1 - adenylate cyclase activating po…
GO:0048856	anatomical structure development	1.34e-09	2e-07	1.28	6963	1015	1950	365	[Myt1l - myelin transcription factor 1-like, Hmgcr - 3-hydroxy-3-methylglutaryl-coa reductase, Vwf - von willebrand factor, Mobp - myelin-associated oligodendrocyte basic protein, Adam10 - adam metallopeptidase domain 10, Acadm - acyl-coa dehydrogenase, c-4 to c-12 straight chain, Cdk5r2 - cyclin-dependent kinase 5, regulatory subunit 2 (p39), Ddr1 - discoidin domain receptor tyrosine kinase 1, L…
GO:0035725	sodium ion transmembrane transport	1.48e-09	2.18e-07	3.38	6963	19	1950	18	[Scn4b - sodium channel, voltage-gated, type iv, beta, Slc23a2 - solute carrier family 23 (nucleobase transporters), member 2, Slc24a3 - solute carrier family 24 (sodium/potassium/calcium exchanger), member 3, Slc8a1 - solute carrier family 8 (sodium/calcium exchanger), member 1, Pkd2 - polycystic kidney disease 2 homolog (human), Slc32a1 - solute carrier family 32 (gaba vesicular transporter), m…
GO:0050890	cognition	2.17e-09	3.13e-07	1.92	6963	119	1950	64	[Hmgcr - 3-hydroxy-3-methylglutaryl-coa reductase, Nf1 - neurofibromin 1, Thra - thyroid hormone receptor alpha, Cln8 - ceroid-lipofuscinosis, neuronal 8 (epilepsy, progressive with mental retardation), Slc6a1 - solute carrier family 6 (neurotransmitter transporter, gaba), member 1, Ephb2 - eph receptor b2, Ntrk2 - neurotrophic tyrosine kinase, receptor, type 2, Sgk196 - protein kinase-like prote…
GO:0048812	neuron projection morphogenesis	2.57e-09	3.65e-07	1.87	6963	132	1950	69	[Mapt - microtubule-associated protein tau, Nptx1 - neuronal pentraxin i, Plxnb1 - plexin b1, Atl1 - atlastin gtpase 1, Fgfr3 - fibroblast growth factor receptor 3, Rab8a - rab8a, member ras oncogene family, Ephb2 - eph receptor b2, Epha5 - epha5, Adcy1 - adenylate cyclase 1 (brain), Brsk2 - br serine/threonine kinase 2, Map1b - microtubule-associated protein 1b, Cntn2 - contactin 2 (axonal), Act…
GO:0060078	regulation of postsynaptic membrane potential	3.69e-09	5.16e-07	2.93	6963	28	1950	23	[Sez6 - seizure related 6 homolog (mouse), Grid2 - glutamate receptor, ionotropic, delta 2, P2rx4 - purinergic receptor p2x, ligand-gated ion channel 4, Slc17a7 - solute carrier family 17 (sodium-dependent inorganic phosphate cotransporter), member 7, Shank1 - sh3 and multiple ankyrin repeat domains 1, Grin2c - glutamate receptor, ionotropic, n-methyl d-aspartate 2c, Grin2b - glutamate receptor, …
GO:0050896	response to stimulus	4.35e-09	5.98e-07	1.17	6963	2085	1950	684	[Hmgcr - 3-hydroxy-3-methylglutaryl-coa reductase, A2m - alpha-2-macroglobulin, Acadm - acyl-coa dehydrogenase, c-4 to c-12 straight chain, Creb3 - camp responsive element binding protein 3, Ddr1 - discoidin domain receptor tyrosine kinase 1, Grm8 - glutamate receptor, metabotropic 8, Acp2 - acid phosphatase 2, lysosomal, Adcyap1r1 - adenylate cyclase activating polypeptide 1 receptor 1, Plcd3 - …
GO:0015849	organic acid transport	4.75e-09	6.44e-07	2.28	6963	61	1950	39	[Slc23a2 - solute carrier family 23 (nucleobase transporters), member 2, Slc7a10 - solute carrier family 7 (neutral amino acid transporter light chain, asc system), member 10, Arl6ip5 - adp-ribosylation-like factor 6 interacting protein 5, Slc27a1 - solute carrier family 27 (fatty acid transporter), member 1, Sfxn5 - sideroflexin 5, Slc32a1 - solute carrier family 32 (gaba vesicular transporter),…
GO:0046942	carboxylic acid transport	4.75e-09	6.35e-07	2.28	6963	61	1950	39	[Slc23a2 - solute carrier family 23 (nucleobase transporters), member 2, Slc7a10 - solute carrier family 7 (neutral amino acid transporter light chain, asc system), member 10, Arl6ip5 - adp-ribosylation-like factor 6 interacting protein 5, Slc27a1 - solute carrier family 27 (fatty acid transporter), member 1, Sfxn5 - sideroflexin 5, Slc32a1 - solute carrier family 32 (gaba vesicular transporter),…
GO:0050885	neuromuscular process controlling balance	5.71e-09	7.52e-07	2.73	6963	34	1950	26	[Camk2b - calcium/calmodulin-dependent protein kinase ii beta, Adcy5 - adenylate cyclase 5, Shank1 - sh3 and multiple ankyrin repeat domains 1, Cln8 - ceroid-lipofuscinosis, neuronal 8 (epilepsy, progressive with mental retardation), Hexb - hexosaminidase b, Herc1 - hect (homologous to the e6-ap (ube3a) carboxyl terminus) domain and rcc1 (chc1)-like domain (rld) 1, Slc1a3 - solute carrier family …
GO:0048731	system development	8.01e-09	1.04e-06	1.64	6963	215	1950	99	[Myt1l - myelin transcription factor 1-like, Nf1 - neurofibromin 1, Mobp - myelin-associated oligodendrocyte basic protein, Bmpr2 - bone morphogenetic protein receptor, type ii (serine/threonine kinase), Acp2 - acid phosphatase 2, lysosomal, Ephb2 - eph receptor b2, Sec63 - sec63 homolog (s. cerevisiae), Pofut1 - protein o-fucosyltransferase 1, Cntn4 - contactin 4, Evl - enah/vasp-like, Ndrg2 - n…
GO:0007215	glutamate receptor signaling pathway	8.42e-09	1.08e-06	3	6963	25	1950	21	[Grm4 - glutamate receptor, metabotropic 4, Gnai2 - guanine nucleotide binding protein (g protein), alpha inhibiting activity polypeptide 2, Grm8 - glutamate receptor, metabotropic 8, Atp1a3 - atpase, na+/k+ transporting, alpha 3 polypeptide, Grin2c - glutamate receptor, ionotropic, n-methyl d-aspartate 2c, Grin2b - glutamate receptor, ionotropic, n-methyl d-aspartate 2b, Grin2a - glutamate recep…
GO:0060079	regulation of excitatory postsynaptic membrane potential	1.09e-08	1.38e-06	2.91	6963	27	1950	22	[Sez6 - seizure related 6 homolog (mouse), P2rx4 - purinergic receptor p2x, ligand-gated ion channel 4, Grid2 - glutamate receptor, ionotropic, delta 2, Slc17a7 - solute carrier family 17 (sodium-dependent inorganic phosphate cotransporter), member 7, Shank1 - sh3 and multiple ankyrin repeat domains 1, Grin2c - glutamate receptor, ionotropic, n-methyl d-aspartate 2c, Grin2b - glutamate receptor, …
GO:0044767	single-organism developmental process	1.12e-08	1.39e-06	1.24	6963	1200	1950	417	[Hmgcr - 3-hydroxy-3-methylglutaryl-coa reductase, Acadm - acyl-coa dehydrogenase, c-4 to c-12 straight chain, Cdk5r2 - cyclin-dependent kinase 5, regulatory subunit 2 (p39), Ddr1 - discoidin domain receptor tyrosine kinase 1, Hopx - hop homeobox, Tial1 - tia1 cytotoxic granule-associated rna binding protein-like 1, Plcd3 - phospholipase c, delta 3, Cpe - carboxypeptidase e, Fgfr3 - fibroblast gr…
GO:0009653	anatomical structure morphogenesis	1.3e-08	1.59e-06	1.4	6963	497	1950	195	[Vwf - von willebrand factor, Ddr1 - discoidin domain receptor tyrosine kinase 1, Cpe - carboxypeptidase e, Fgfr3 - fibroblast growth factor receptor 3, Epha7 - eph receptor a7, Ephb2 - eph receptor b2, Epha5 - epha5, Adcy1 - adenylate cyclase 1 (brain), Apc - adenomatous polyposis coli, Fgfr1 - fibroblast growth factor receptor 1, Dscam - down syndrome cell adhesion molecule, Afg3l2 - afg3 atpas…
GO:0007611	learning or memory	1.31e-08	1.59e-06	1.9	6963	113	1950	60	[Hmgcr - 3-hydroxy-3-methylglutaryl-coa reductase, Nf1 - neurofibromin 1, Thra - thyroid hormone receptor alpha, Cln8 - ceroid-lipofuscinosis, neuronal 8 (epilepsy, progressive with mental retardation), Slc6a1 - solute carrier family 6 (neurotransmitter transporter, gaba), member 1, Ephb2 - eph receptor b2, Sgk196 - protein kinase-like protein sgk196, Ntrk2 - neurotrophic tyrosine kinase, recepto…
GO:0051960	regulation of nervous system development	1.43e-08	1.7e-06	1.55	6963	276	1950	120	[Nf1 - neurofibromin 1, Grid2 - glutamate receptor, ionotropic, delta 2, Plxnb1 - plexin b1, Ywhag - tyrosine 3-monooxygenase/tryptophan 5-monooxygenase activation protein, gamma polypeptide, Cpe - carboxypeptidase e, Skor2-ps1 - ski family transcriptional corepressor 2, pseudogene 1, Srcin1 - src kinase signaling inhibitor 1, Cbln1 - cerebellin 1 precursor, Fgfr3 - fibroblast growth factor recep…
GO:0001508	regulation of action potential	1.47e-08	1.74e-06	2.76	6963	31	1950	24	[Scn4b - sodium channel, voltage-gated, type iv, beta, Kcnd2 - potassium voltage-gated channel, shal-related subfamily, member 2, Chrnb2 - cholinergic receptor, nicotinic, beta 2 (neuronal), Cacna1g - calcium channel, voltage-dependent, t type, alpha 1g subunit, P2rx4 - purinergic receptor p2x, ligand-gated ion channel 4, Scn3a - sodium channel, voltage-gated, type iii, alpha, Kcnma1 - potassium …
GO:0031646	positive regulation of neurological system process	1.52e-08	1.76e-06	2.53	6963	41	1950	29	[Camk2b - calcium/calmodulin-dependent protein kinase ii beta, S100b - s100 calcium binding protein b, Nptn - neuroplastin, Slc1a3 - solute carrier family 1 (glial high affinity glutamate transporter), member 3, Ntrk2 - neurotrophic tyrosine kinase, receptor, type 2, Ptk2 - ptk2 protein tyrosine kinase 2, Gfap - glial fibrillary acidic protein, Tnr - tenascin r (restrictin, janusin), Crhr1 - cort…
GO:0051971	positive regulation of transmission of nerve impulse	1.63e-08	1.87e-06	2.61	6963	37	1950	27	[Camk2b - calcium/calmodulin-dependent protein kinase ii beta, S100b - s100 calcium binding protein b, Slc1a3 - solute carrier family 1 (glial high affinity glutamate transporter), member 3, Nptn - neuroplastin, Ntrk2 - neurotrophic tyrosine kinase, receptor, type 2, Ptk2 - ptk2 protein tyrosine kinase 2, Gfap - glial fibrillary acidic protein, Tnr - tenascin r (restrictin, janusin), Crhr1 - cort…
GO:0050806	positive regulation of synaptic transmission	1.63e-08	1.85e-06	2.61	6963	37	1950	27	[Camk2b - calcium/calmodulin-dependent protein kinase ii beta, S100b - s100 calcium binding protein b, Nptn - neuroplastin, Slc1a3 - solute carrier family 1 (glial high affinity glutamate transporter), member 3, Ntrk2 - neurotrophic tyrosine kinase, receptor, type 2, Ptk2 - ptk2 protein tyrosine kinase 2, Gfap - glial fibrillary acidic protein, Tnr - tenascin r (restrictin, janusin), Crhr1 - cort…
GO:0010975	regulation of neuron projection development	1.87e-08	2.09e-06	1.74	6963	158	1950	77	[Aatk - apoptosis-associated tyrosine kinase, Mapt - microtubule-associated protein tau, Grid2 - glutamate receptor, ionotropic, delta 2, Plxnb1 - plexin b1, Lrp8 - low density lipoprotein receptor-related protein 8, apolipoprotein e receptor, Skor2-ps1 - ski family transcriptional corepressor 2, pseudogene 1, Srcin1 - src kinase signaling inhibitor 1, Nptn - neuroplastin, Ephb2 - eph receptor b2…
GO:0009605	response to external stimulus	2.33e-08	2.58e-06	1.49	6963	330	1950	138	[Hmgcr - 3-hydroxy-3-methylglutaryl-coa reductase, Ctsb - cathepsin b, A2m - alpha-2-macroglobulin, Usf2 - upstream transcription factor 2, c-fos interacting, Acadm - acyl-coa dehydrogenase, c-4 to c-12 straight chain, Grm8 - glutamate receptor, metabotropic 8, Plcb4 - phospholipase c, beta 4, Bmpr2 - bone morphogenetic protein receptor, type ii (serine/threonine kinase), Thra - thyroid hormone r…
GO:0023056	positive regulation of signaling	2.42e-08	2.64e-06	1.49	6963	336	1950	140	[Hmgcr - 3-hydroxy-3-methylglutaryl-coa reductase, P2rx4 - purinergic receptor p2x, ligand-gated ion channel 4, Bmpr2 - bone morphogenetic protein receptor, type ii (serine/threonine kinase), Plxnb1 - plexin b1, Taok3 - tao kinase 3, Skor2-ps1 - ski family transcriptional corepressor 2, pseudogene 1, Arl2bp - adp-ribosylation factor-like 2 binding protein, Fgfr3 - fibroblast growth factor recepto…
GO:0051966	regulation of synaptic transmission, glutamatergic	2.55e-08	2.75e-06	2.98	6963	24	1950	20	[Serpine2 - serpin peptidase inhibitor, clade e, member 2, Mapk8ip2 - mitogen-activated protein kinase 8 interacting protein 2, Prkaca - protein kinase, camp-dependent, catalytic, alpha, Grm1 - glutamate receptor, metabotropic 1, Nlgn1 - neuroligin 1, Ntrk2 - neurotrophic tyrosine kinase, receptor, type 2, Grik1 - glutamate receptor, ionotropic, kainate 1, Atad1 - atpase family, aaa domain contai…
GO:0010647	positive regulation of cell communication	3.02e-08	3.22e-06	1.48	6963	337	1950	140	[Hmgcr - 3-hydroxy-3-methylglutaryl-coa reductase, P2rx4 - purinergic receptor p2x, ligand-gated ion channel 4, Bmpr2 - bone morphogenetic protein receptor, type ii (serine/threonine kinase), Plxnb1 - plexin b1, Taok3 - tao kinase 3, Skor2-ps1 - ski family transcriptional corepressor 2, pseudogene 1, Arl2bp - adp-ribosylation factor-like 2 binding protein, Fgfr3 - fibroblast growth factor recepto…
GO:0048167	regulation of synaptic plasticity	4.45e-08	4.68e-06	2.03	6963	81	1950	46	[Nf1 - neurofibromin 1, Syp - synaptophysin, Camk2b - calcium/calmodulin-dependent protein kinase ii beta, Abhd6 - abhydrolase domain containing 6, Ywhag - tyrosine 3-monooxygenase/tryptophan 5-monooxygenase activation protein, gamma polypeptide, S100b - s100 calcium binding protein b, Rab8a - rab8a, member ras oncogene family, Nptn - neuroplastin, Ppt1 - palmitoyl-protein thioesterase 1, Ephb2 -…
GO:0050905	neuromuscular process	4.79e-08	4.99e-06	2.31	6963	51	1950	33	[Camk2b - calcium/calmodulin-dependent protein kinase ii beta, Adcy5 - adenylate cyclase 5, Shank1 - sh3 and multiple ankyrin repeat domains 1, Cln8 - ceroid-lipofuscinosis, neuronal 8 (epilepsy, progressive with mental retardation), Herc1 - hect (homologous to the e6-ap (ube3a) carboxyl terminus) domain and rcc1 (chc1)-like domain (rld) 1, Hexb - hexosaminidase b, Slc1a3 - solute carrier family …
GO:0044763	single-organism cellular process	5.31e-08	5.46e-06	1.11	6963	3207	1950	998	[A2m - alpha-2-macroglobulin, Acadm - acyl-coa dehydrogenase, c-4 to c-12 straight chain, Creb3 - camp responsive element binding protein 3, Gpr158 - g protein-coupled receptor 158, Grm8 - glutamate receptor, metabotropic 8, Acp2 - acid phosphatase 2, lysosomal, Hopx - hop homeobox, Tial1 - tia1 cytotoxic granule-associated rna binding protein-like 1, Adcyap1r1 - adenylate cyclase activating poly…
GO:0006928	cellular component movement	6.94e-08	7.06e-06	1.51	6963	294	1950	124	[Arhgap21 - rho gtpase activating protein 21, Cdc42bpb - cdc42 binding protein kinase beta (dmpk-like), Ddr1 - discoidin domain receptor tyrosine kinase 1, Cdk5r2 - cyclin-dependent kinase 5, regulatory subunit 2 (p39), Copg - coatomer protein complex, subunit gamma, Kif13a - kinesin family member 13a, Nr2f2 - nuclear receptor subfamily 2, group f, member 2, Fmnl1 - formin-like 1, Plat - plasmino…
GO:0042221	response to chemical stimulus	7.9e-08	7.94e-06	1.25	6963	1040	1950	363	[Hmgcr - 3-hydroxy-3-methylglutaryl-coa reductase, A2m - alpha-2-macroglobulin, Adam10 - adam metallopeptidase domain 10, Acadm - acyl-coa dehydrogenase, c-4 to c-12 straight chain, P2rx4 - purinergic receptor p2x, ligand-gated ion channel 4, Acp2 - acid phosphatase 2, lysosomal, Adcyap1r1 - adenylate cyclase activating polypeptide 1 receptor 1, Slc6a11 - solute carrier family 6 (neurotransmitter…
GO:0007610	behavior	9.9e-08	9.84e-06	1.56	6963	238	1950	104	[Hmgcr - 3-hydroxy-3-methylglutaryl-coa reductase, Nf1 - neurofibromin 1, Adcy5 - adenylate cyclase 5, Thra - thyroid hormone receptor alpha, Slc6a1 - solute carrier family 6 (neurotransmitter transporter, gaba), member 1, Ephb2 - eph receptor b2, Ntrk2 - neurotrophic tyrosine kinase, receptor, type 2, Sgk196 - protein kinase-like protein sgk196, Adcy1 - adenylate cyclase 1 (brain), Cntn2 - conta…
GO:0034765	regulation of ion transmembrane transport	1.04e-07	1.02e-05	2.05	6963	73	1950	42	[Scn4b - sodium channel, voltage-gated, type iv, beta, Akt2 - v-akt murine thymoma viral oncogene homolog 2, Clcn3 - chloride channel 3, Ahcyl1 - adenosylhomocysteinase-like 1, Shank1 - sh3 and multiple ankyrin repeat domains 1, Clcn2 - chloride channel 2, Kcnj11 - potassium inwardly rectifying channel, subfamily j, member 11, Wwp2 - ww domain containing e3 ubiquitin protein ligase 2, Acsl6 - acy…
GO:0031344	regulation of cell projection organization	1.21e-07	1.17e-05	1.63	6963	191	1950	87	[Aatk - apoptosis-associated tyrosine kinase, Mapt - microtubule-associated protein tau, Grid2 - glutamate receptor, ionotropic, delta 2, Plxnb1 - plexin b1, Lrp8 - low density lipoprotein receptor-related protein 8, apolipoprotein e receptor, Skor2-ps1 - ski family transcriptional corepressor 2, pseudogene 1, Srcin1 - src kinase signaling inhibitor 1, Nptn - neuroplastin, Ephb2 - eph receptor b2…
GO:0072507	divalent inorganic cation homeostasis	1.23e-07	1.18e-05	1.87	6963	103	1950	54	[Slc39a14 - solute carrier family 39 (zinc transporter), member 14, Slc30a5 - solute carrier family 30 (zinc transporter), member 5, Mcoln1 - mucolipin 1, Ero1l - ero1-like (s. cerevisiae), Hexb - hexosaminidase b, Nptn - neuroplastin, Ednrb - endothelin receptor type b, Grin1 - glutamate receptor, ionotropic, n-methyl d-aspartate 1, Ryr2 - ryanodine receptor 2, cardiac, Slc39a13 - solute carrier…
GO:0007612	learning	1.35e-07	1.28e-05	2.12	6963	64	1950	38	[Hmgcr - 3-hydroxy-3-methylglutaryl-coa reductase, Nf1 - neurofibromin 1, Shank1 - sh3 and multiple ankyrin repeat domains 1, Cln8 - ceroid-lipofuscinosis, neuronal 8 (epilepsy, progressive with mental retardation), Slc6a1 - solute carrier family 6 (neurotransmitter transporter, gaba), member 1, Ephb2 - eph receptor b2, Ppt1 - palmitoyl-protein thioesterase 1, Ntrk2 - neurotrophic tyrosine kinase…
GO:0034762	regulation of transmembrane transport	1.42e-07	1.33e-05	2.02	6963	76	1950	43	[Scn4b - sodium channel, voltage-gated, type iv, beta, Akt2 - v-akt murine thymoma viral oncogene homolog 2, Clcn3 - chloride channel 3, Ahcyl1 - adenosylhomocysteinase-like 1, Shank1 - sh3 and multiple ankyrin repeat domains 1, Clcn2 - chloride channel 2, Kcnj11 - potassium inwardly rectifying channel, subfamily j, member 11, Acsl6 - acyl-coa synthetase long-chain family member 6, Wwp2 - ww doma…
GO:0072503	cellular divalent inorganic cation homeostasis	1.94e-07	1.81e-05	1.88	6963	99	1950	52	[Slc39a14 - solute carrier family 39 (zinc transporter), member 14, Slc30a5 - solute carrier family 30 (zinc transporter), member 5, Mcoln1 - mucolipin 1, Ero1l - ero1-like (s. cerevisiae), Hexb - hexosaminidase b, Nptn - neuroplastin, Ednrb - endothelin receptor type b, Grin1 - glutamate receptor, ionotropic, n-methyl d-aspartate 1, Ryr2 - ryanodine receptor 2, cardiac, Slc39a13 - solute carrier…
GO:2000026	regulation of multicellular organismal development	2.07e-07	1.91e-05	1.37	6963	479	1950	184	[Hmgcr - 3-hydroxy-3-methylglutaryl-coa reductase, Nf1 - neurofibromin 1, Bai3 - brain-specific angiogenesis inhibitor 3, Adam10 - adam metallopeptidase domain 10, Bmpr2 - bone morphogenetic protein receptor, type ii (serine/threonine kinase), Grid2 - glutamate receptor, ionotropic, delta 2, Hopx - hop homeobox, Thra - thyroid hormone receptor alpha, Plxnb1 - plexin b1, Ywhag - tyrosine 3-monooxy…
GO:0050795	regulation of behavior	2.22e-07	2.02e-05	2.24	6963	51	1950	32	[Il16 - interleukin 16, Plxna4a - plexin a4, a, Creb3 - camp responsive element binding protein 3, Adam10 - adam metallopeptidase domain 10, Akt2 - v-akt murine thymoma viral oncogene homolog 2, Cdh13 - cadherin 13, S1pr1 - sphingosine-1-phosphate receptor 1, Ptprj - protein tyrosine phosphatase, receptor type, j, Robo1 - roundabout homolog 1 (drosophila), Cnr1 - cannabinoid receptor 1 (brain), A…
GO:0055080	cation homeostasis	2.51e-07	2.27e-05	1.68	6963	155	1950	73	[Slc39a14 - solute carrier family 39 (zinc transporter), member 14, Slc30a5 - solute carrier family 30 (zinc transporter), member 5, Slc4a4 - solute carrier family 4, sodium bicarbonate cotransporter, member 4, Mcoln1 - mucolipin 1, Ero1l - ero1-like (s. cerevisiae), Hexb - hexosaminidase b, Nptn - neuroplastin, Ednrb - endothelin receptor type b, Slc9a3 - solute carrier family 9 (sodium/hydrogen…
GO:0007600	sensory perception	2.81e-07	2.51e-05	1.84	6963	105	1950	54	[Gng13 - guanine nucleotide binding protein (g protein), gamma 13, Mme - membrane metallo-endopeptidase, Grm8 - glutamate receptor, metabotropic 8, P2rx4 - purinergic receptor p2x, ligand-gated ion channel 4, Cln8 - ceroid-lipofuscinosis, neuronal 8 (epilepsy, progressive with mental retardation), B3gnt2 - udp-glcnac:betagal beta-1,3-n-acetylglucosaminyltransferase 2, Hexb - hexosaminidase b, Opn…
GO:0006865	amino acid transport	3.59e-07	3.18e-05	2.3	6963	45	1950	29	[Slc7a10 - solute carrier family 7 (neutral amino acid transporter light chain, asc system), member 10, Arl6ip5 - adp-ribosylation-like factor 6 interacting protein 5, Slc32a1 - solute carrier family 32 (gaba vesicular transporter), member 1, Cln8 - ceroid-lipofuscinosis, neuronal 8 (epilepsy, progressive with mental retardation), Slc1a2 - solute carrier family 1 (glial high affinity glutamate tr…
GO:0035235	ionotropic glutamate receptor signaling pathway	3.65e-07	3.2e-05	3.15	6963	17	1950	15	[Atp1a3 - atpase, na+/k+ transporting, alpha 3 polypeptide, Grin2c - glutamate receptor, ionotropic, n-methyl d-aspartate 2c, Grin2b - glutamate receptor, ionotropic, n-methyl d-aspartate 2b, Grin2a - glutamate receptor, ionotropic, n-methyl d-aspartate 2a, App - amyloid beta (a4) precursor protein, Grik1 - glutamate receptor, ionotropic, kainate 1, Grik4 - glutamate receptor, ionotropic, kainate…
GO:0045664	regulation of neuron differentiation	4e-07	3.47e-05	1.56	6963	215	1950	94	[Nf1 - neurofibromin 1, Aatk - apoptosis-associated tyrosine kinase, Mapt - microtubule-associated protein tau, Grid2 - glutamate receptor, ionotropic, delta 2, Plxnb1 - plexin b1, Lrp8 - low density lipoprotein receptor-related protein 8, apolipoprotein e receptor, Ywhag - tyrosine 3-monooxygenase/tryptophan 5-monooxygenase activation protein, gamma polypeptide, Skor2-ps1 - ski family transcript…
GO:0033619	membrane protein proteolysis	6.75e-07	5.81e-05	2.89	6963	21	1950	17	[Adam9 - adam metallopeptidase domain 9, Erap1 - endoplasmic reticulum aminopeptidase 1, Ncstn - nicastrin, Adam10 - adam metallopeptidase domain 10, Sppl2b - signal peptide peptidase-like 2b, Sppl2a - signal peptide peptidase-like 2a, Psenen - presenilin enhancer 2 homolog (c. elegans), Myh9 - myosin, heavy chain 9, non-muscle, Ctsh - cathepsin h, Adam19 - adam metallopeptidase domain 19, Ret - …
GO:0050767	regulation of neurogenesis	7.27e-07	6.19e-05	1.51	6963	249	1950	105	[Nf1 - neurofibromin 1, Grid2 - glutamate receptor, ionotropic, delta 2, Plxnb1 - plexin b1, Ywhag - tyrosine 3-monooxygenase/tryptophan 5-monooxygenase activation protein, gamma polypeptide, Skor2-ps1 - ski family transcriptional corepressor 2, pseudogene 1, Srcin1 - src kinase signaling inhibitor 1, Fgfr3 - fibroblast growth factor receptor 3, Nptn - neuroplastin, Adra2b - adrenergic, alpha-2b-…
GO:0048583	regulation of response to stimulus	7.54e-07	6.36e-05	1.25	6963	877	1950	307	[Hmgcr - 3-hydroxy-3-methylglutaryl-coa reductase, A2m - alpha-2-macroglobulin, Adam10 - adam metallopeptidase domain 10, Creb3 - camp responsive element binding protein 3, Gpr158 - g protein-coupled receptor 158, P2rx4 - purinergic receptor p2x, ligand-gated ion channel 4, Grid2 - glutamate receptor, ionotropic, delta 2, Hopx - hop homeobox, Arl2bp - adp-ribosylation factor-like 2 binding protei…
GO:0040012	regulation of locomotion	8.38e-07	7e-05	1.57	6963	198	1950	87	[Nf1 - neurofibromin 1, Adam9 - adam metallopeptidase domain 9, Creb3 - camp responsive element binding protein 3, Adam10 - adam metallopeptidase domain 10, Akt2 - v-akt murine thymoma viral oncogene homolog 2, Bmpr2 - bone morphogenetic protein receptor, type ii (serine/threonine kinase), Nr2f2 - nuclear receptor subfamily 2, group f, member 2, Srcin1 - src kinase signaling inhibitor 1, Magi2 - …
GO:0009966	regulation of signal transduction	8.71e-07	7.22e-05	1.28	6963	711	1950	255	[Hmgcr - 3-hydroxy-3-methylglutaryl-coa reductase, Gpr158 - g protein-coupled receptor 158, P2rx4 - purinergic receptor p2x, ligand-gated ion channel 4, Arl2bp - adp-ribosylation factor-like 2 binding protein, Fgfr3 - fibroblast growth factor receptor 3, Epha7 - eph receptor a7, C1qtnf1 - c1q and tumor necrosis factor related protein 1, Adra2b - adrenergic, alpha-2b-, receptor, Ptprj - protein ty…
GO:0051270	regulation of cellular component movement	9.13e-07	7.49e-05	1.56	6963	204	1950	89	[Nf1 - neurofibromin 1, Adam9 - adam metallopeptidase domain 9, Mapt - microtubule-associated protein tau, Adam10 - adam metallopeptidase domain 10, Creb3 - camp responsive element binding protein 3, Akt2 - v-akt murine thymoma viral oncogene homolog 2, Bmpr2 - bone morphogenetic protein receptor, type ii (serine/threonine kinase), Nr2f2 - nuclear receptor subfamily 2, group f, member 2, Srcin1 -…
GO:0016477	cell migration	1.04e-06	8.47e-05	1.57	6963	196	1950	86	[Cdc42bpb - cdc42 binding protein kinase beta (dmpk-like), Col5a1 - collagen, type v, alpha 1, Mapt - microtubule-associated protein tau, Cdk5r2 - cyclin-dependent kinase 5, regulatory subunit 2 (p39), Ddr1 - discoidin domain receptor tyrosine kinase 1, Tyro3 - tyro3 protein tyrosine kinase, Gad1 - glutamate decarboxylase 1, Nr2f2 - nuclear receptor subfamily 2, group f, member 2, Fmnl1 - formin-…
GO:0006874	cellular calcium ion homeostasis	1.12e-06	9.03e-05	1.84	6963	93	1950	48	[Apoe - apolipoprotein e, Cacna1g - calcium channel, voltage-dependent, t type, alpha 1g subunit, Slc8a1 - solute carrier family 8 (sodium/calcium exchanger), member 1, Itgav - integrin, alpha v, Mcoln1 - mucolipin 1, S1pr1 - sphingosine-1-phosphate receptor 1, Dmpk - dystrophia myotonica-protein kinase, Ero1l - ero1-like (s. cerevisiae), Hexb - hexosaminidase b, Nptn - neuroplastin, Ednrb - endo…
GO:0055074	calcium ion homeostasis	1.33e-06	0.000106	1.82	6963	96	1950	49	[Mcoln1 - mucolipin 1, Ero1l - ero1-like (s. cerevisiae), Hexb - hexosaminidase b, Nptn - neuroplastin, Ednrb - endothelin receptor type b, Grin1 - glutamate receptor, ionotropic, n-methyl d-aspartate 1, Ryr2 - ryanodine receptor 2, cardiac, Gja1 - gap junction protein, alpha 1, Crhr1 - corticotropin releasing hormone receptor 1, Trpc1 - transient receptor potential cation channel, subfamily c, m…
GO:0008016	regulation of heart contraction	1.37e-06	0.000108	2.2	6963	47	1950	29	[Adrbk1 - adrenergic, beta, receptor kinase 1, Scn4b - sodium channel, voltage-gated, type iv, beta, Dmd - dystrophin, Cacna1g - calcium channel, voltage-dependent, t type, alpha 1g subunit, P2rx4 - purinergic receptor p2x, ligand-gated ion channel 4, Hopx - hop homeobox, Slc8a1 - solute carrier family 8 (sodium/calcium exchanger), member 1, Thra - thyroid hormone receptor alpha, Chga - chromogra…
GO:0006629	lipid metabolic process	1.75e-06	0.000137	1.41	6963	345	1950	136	[Hmgcr - 3-hydroxy-3-methylglutaryl-coa reductase, Cdipt - cdp-diacylglycerol--inositol 3-phosphatidyltransferase, Hsd17b14 - hydroxysteroid (17-beta) dehydrogenase 14, Acadm - acyl-coa dehydrogenase, c-4 to c-12 straight chain, Plcb4 - phospholipase c, beta 4, Ppap2b - phosphatidic acid phosphatase type 2b, Plcd3 - phospholipase c, delta 3, Acsl4 - acyl-coa synthetase long-chain family member 4,…
GO:0030003	cellular cation homeostasis	1.79e-06	0.000139	1.68	6963	134	1950	63	[Slc39a14 - solute carrier family 39 (zinc transporter), member 14, Slc30a5 - solute carrier family 30 (zinc transporter), member 5, Mcoln1 - mucolipin 1, Ero1l - ero1-like (s. cerevisiae), Hexb - hexosaminidase b, Nptn - neuroplastin, Ednrb - endothelin receptor type b, Grin1 - glutamate receptor, ionotropic, n-methyl d-aspartate 1, Ryr2 - ryanodine receptor 2, cardiac, Slc9a1 - solute carrier f…
GO:0007270	neuron-neuron synaptic transmission	1.88e-06	0.000145	2.45	6963	32	1950	22	[Cdh8 - cadherin 8, Grm4 - glutamate receptor, metabotropic 4, Tmod2 - tropomodulin 2, Grid2 - glutamate receptor, ionotropic, delta 2, Grm8 - glutamate receptor, metabotropic 8, Slc17a7 - solute carrier family 17 (sodium-dependent inorganic phosphate cotransporter), member 7, Gabrb2 - gamma-aminobutyric acid (gaba) a receptor, beta 2, Als2 - amyotrophic lateral sclerosis 2 (juvenile) homolog (hu…
GO:0030334	regulation of cell migration	2.06e-06	0.000158	1.58	6963	176	1950	78	[Nf1 - neurofibromin 1, Adam9 - adam metallopeptidase domain 9, Adam10 - adam metallopeptidase domain 10, Creb3 - camp responsive element binding protein 3, Akt2 - v-akt murine thymoma viral oncogene homolog 2, Bmpr2 - bone morphogenetic protein receptor, type ii (serine/threonine kinase), Nr2f2 - nuclear receptor subfamily 2, group f, member 2, Srcin1 - src kinase signaling inhibitor 1, Magi2 - …
GO:0048870	cell motility	2.13e-06	0.000162	1.52	6963	216	1950	92	[Cdc42bpb - cdc42 binding protein kinase beta (dmpk-like), Col5a1 - collagen, type v, alpha 1, Mapt - microtubule-associated protein tau, Ddr1 - discoidin domain receptor tyrosine kinase 1, Cdk5r2 - cyclin-dependent kinase 5, regulatory subunit 2 (p39), Gad1 - glutamate decarboxylase 1, Tyro3 - tyro3 protein tyrosine kinase, Nr2f2 - nuclear receptor subfamily 2, group f, member 2, Fmnl1 - formin-…
GO:0046903	secretion	2.19e-06	0.000165	1.6	6963	165	1950	74	[Syt2 - synaptotagmin ii, Usf2 - upstream transcription factor 2, c-fos interacting, Ddr1 - discoidin domain receptor tyrosine kinase 1, Scamp5 - secretory carrier membrane protein 5, Tyro3 - tyro3 protein tyrosine kinase, Agpat6 - 1-acylglycerol-3-phosphate o-acyltransferase 6 (lysophosphatidic acid acyltransferase, zeta), Srcin1 - src kinase signaling inhibitor 1, Cbln1 - cerebellin 1 precursor…
GO:0007157	heterophilic cell-cell adhesion	2.19e-06	0.000163	3.3	6963	13	1950	12	[Cdh2 - cadherin 2, Il1rapl1 - interleukin 1 receptor accessory protein-like 1, Odz2 - odz, odd oz/ten-m homolog 2 (drosophila), Ptprd - protein tyrosine phosphatase, receptor type, d, Pvrl1 - poliovirus receptor-related 1, Amigo1 - adhesion molecule with ig like domain 1, Nrxn1 - neurexin 1, Cadm3 - cell adhesion molecule 3, Lphn1 - latrophilin 1, L1cam - l1 cell adhesion molecule, Cadm1 - cell …
GO:0032409	regulation of transporter activity	2.21e-06	0.000164	2.02	6963	62	1950	35	[Scn4b - sodium channel, voltage-gated, type iv, beta, Ndfip2 - nedd4 family interacting protein 2, Ahcyl1 - adenosylhomocysteinase-like 1, Syngr3 - synaptogyrin 3, Shank1 - sh3 and multiple ankyrin repeat domains 1, Wwp2 - ww domain containing e3 ubiquitin protein ligase 2, Ndfip1 - nedd4 family interacting protein 1, Grk6 - g protein-coupled receptor kinase 6, Cacng2 - calcium channel, voltage-…
GO:0007416	synapse assembly	2.28e-06	0.000167	2.61	6963	26	1950	19	[Il1rapl1 - interleukin 1 receptor accessory protein-like 1, Ptprd - protein tyrosine phosphatase, receptor type, d, Lrp4 - low density lipoprotein receptor-related protein 4, App - amyloid beta (a4) precursor protein, Nlgn1 - neuroligin 1, Cdh2 - cadherin 2, Pten - phosphatase and tensin homolog, Gpm6a - glycoprotein m6a, Nlgn2 - neuroligin 2, Cacna1a - calcium channel, voltage-dependent, p/q ty…
GO:0016485	protein processing	2.53e-06	0.000184	2.16	6963	48	1950	29	[Spcs1 - signal peptidase complex subunit 1 homolog (s. cerevisiae), Fkrp - fukutin related protein, Ncstn - nicastrin, Atp6ap2 - atpase, h+ transporting, lysosomal accessory protein 2, Ece2 - endothelin-converting enzyme 2, Pcsk2 - proprotein convertase subtilisin/kexin type 2, Spcs3 - signal peptidase complex subunit 3 homolog (s. cerevisiae), Cpe - carboxypeptidase e, Plat - plasminogen activa…
GO:0007626	locomotory behavior	2.66e-06	0.000192	1.83	6963	90	1950	46	[Astn1 - astrotactin 1, Mapt - microtubule-associated protein tau, Adcy5 - adenylate cyclase 5, Abat - 4-aminobutyrate aminotransferase, Gprc5b - g protein-coupled receptor, family c, group 5, member b, Cln8 - ceroid-lipofuscinosis, neuronal 8 (epilepsy, progressive with mental retardation), Hexb - hexosaminidase b, Ppt1 - palmitoyl-protein thioesterase 1, Glrb - glycine receptor, beta, Gnao1 - g…
GO:0051606	detection of stimulus	2.7e-06	0.000193	2.29	6963	39	1950	25	[Plcb4 - phospholipase c, beta 4, Grm8 - glutamate receptor, metabotropic 8, Syt7 - synaptotagmin vii, Kcnmb4 - potassium large conductance calcium-activated channel, subfamily m, beta member 4, Fyn - fyn oncogene related to src, fgr, yes, Sox2 - sry (sex determining region y)-box 2, Ryr2 - ryanodine receptor 2, cardiac, Adora1 - adenosine a1 receptor, Accn1 - amiloride-sensitive cation channel 1…
GO:0007411	axon guidance	2.93e-06	0.000208	1.98	6963	65	1950	36	[B3gnt2 - udp-glcnac:betagal beta-1,3-n-acetylglucosaminyltransferase 2, Epha7 - eph receptor a7, Ephb2 - eph receptor b2, Epha5 - epha5, Odz2 - odz, odd oz/ten-m homolog 2 (drosophila), Chn1 - chimerin (chimaerin) 1, Robo1 - roundabout homolog 1 (drosophila), Alcam - activated leukocyte cell adhesion molecule, Cntn2 - contactin 2 (axonal), Mycbp2 - myc binding protein 2, L1cam - l1 cell adhesion…
GO:0010959	regulation of metal ion transport	3.76e-06	0.000265	1.75	6963	104	1950	51	[Creb3 - camp responsive element binding protein 3, Akt2 - v-akt murine thymoma viral oncogene homolog 2, P2rx4 - purinergic receptor p2x, ligand-gated ion channel 4, Plcb4 - phospholipase c, beta 4, Ahcyl1 - adenosylhomocysteinase-like 1, Adcyap1r1 - adenylate cyclase activating polypeptide 1 receptor 1, Gnao1 - guanine nucleotide binding protein (g protein), alpha activating activity polypeptid…
GO:2000145	regulation of cell motility	3.96e-06	0.000277	1.55	6963	187	1950	81	[Nf1 - neurofibromin 1, Adam9 - adam metallopeptidase domain 9, Creb3 - camp responsive element binding protein 3, Adam10 - adam metallopeptidase domain 10, Akt2 - v-akt murine thymoma viral oncogene homolog 2, Bmpr2 - bone morphogenetic protein receptor, type ii (serine/threonine kinase), Nr2f2 - nuclear receptor subfamily 2, group f, member 2, Srcin1 - src kinase signaling inhibitor 1, Magi2 - …
GO:0022898	regulation of transmembrane transporter activity	4.22e-06	0.000293	2.04	6963	56	1950	32	[Scn4b - sodium channel, voltage-gated, type iv, beta, Ahcyl1 - adenosylhomocysteinase-like 1, Shank1 - sh3 and multiple ankyrin repeat domains 1, Wwp2 - ww domain containing e3 ubiquitin protein ligase 2, Grk6 - g protein-coupled receptor kinase 6, Cacng2 - calcium channel, voltage-dependent, gamma subunit 2, Ryr2 - ryanodine receptor 2, cardiac, Asph - aspartate-beta-hydroxylase, Nedd4 - neural…
GO:0048869	cellular developmental process	4.24e-06	0.000292	1.25	6963	788	1950	275	[Myt1l - myelin transcription factor 1-like, Hmgcr - 3-hydroxy-3-methylglutaryl-coa reductase, A2m - alpha-2-macroglobulin, Acadm - acyl-coa dehydrogenase, c-4 to c-12 straight chain, Hopx - hop homeobox, Adcyap1r1 - adenylate cyclase activating polypeptide 1 receptor 1, Tial1 - tia1 cytotoxic granule-associated rna binding protein-like 1, Fgfr3 - fibroblast growth factor receptor 3, Ptprj - prot…
GO:0048858	cell projection morphogenesis	4.48e-06	0.000306	1.59	6963	162	1950	72	[Mapt - microtubule-associated protein tau, Nptx1 - neuronal pentraxin i, Plxnb1 - plexin b1, Atl1 - atlastin gtpase 1, Fgfr3 - fibroblast growth factor receptor 3, Rab8a - rab8a, member ras oncogene family, Ephb2 - eph receptor b2, Epha5 - epha5, Adcy1 - adenylate cyclase 1 (brain), Brsk2 - br serine/threonine kinase 2, Map1b - microtubule-associated protein 1b, Sept7 - septin 7, Cntn2 - contact…
GO:0060284	regulation of cell development	4.54e-06	0.000308	1.43	6963	287	1950	115	[Nf1 - neurofibromin 1, Grid2 - glutamate receptor, ionotropic, delta 2, Plxnb1 - plexin b1, Thra - thyroid hormone receptor alpha, Ywhag - tyrosine 3-monooxygenase/tryptophan 5-monooxygenase activation protein, gamma polypeptide, Skor2-ps1 - ski family transcriptional corepressor 2, pseudogene 1, Srcin1 - src kinase signaling inhibitor 1, Fgfr3 - fibroblast growth factor receptor 3, Nptn - neuro…
GO:0007218	neuropeptide signaling pathway	4.87e-06	0.000328	2.94	6963	17	1950	14	[Bai2 - brain-specific angiogenesis inhibitor 2, Gal - galanin prepropeptide, Lphn1 - latrophilin 1, Celsr3 - cadherin, egf lag seven-pass g-type receptor 3 (flamingo homolog, drosophila), Celsr2 - cadherin, egf lag seven-pass g-type receptor 2 (flamingo homolog, drosophila), Penk - proenkephalin, Glrb - glycine receptor, beta, Lphn2 - latrophilin 2, Scg5 - secretogranin v (7b2 protein), Pcsk1n -…
GO:0032412	regulation of ion transmembrane transporter activity	5.22e-06	0.000349	2.05	6963	54	1950	31	[Scn4b - sodium channel, voltage-gated, type iv, beta, Ahcyl1 - adenosylhomocysteinase-like 1, Shank1 - sh3 and multiple ankyrin repeat domains 1, Wwp2 - ww domain containing e3 ubiquitin protein ligase 2, Grk6 - g protein-coupled receptor kinase 6, Cacng2 - calcium channel, voltage-dependent, gamma subunit 2, Ryr2 - ryanodine receptor 2, cardiac, Asph - aspartate-beta-hydroxylase, Nedd4 - neural…
GO:0009100	glycoprotein metabolic process	5.68e-06	0.000376	2.51	6963	27	1950	19	[Glce - glucuronic acid epimerase, Igf1 - insulin-like growth factor 1, Fkrp - fukutin related protein, Xylt2 - xylosyltransferase ii, Erp44 - endoplasmic reticulum protein 44, Man1a2 - mannosidase, alpha, class 1a, member 2, Edem3 - er degradation enhancer, mannosidase alpha-like 3, Ndst1 - n-deacetylase/n-sulfotransferase (heparan glucosaminyl) 1, Pcsk6 - proprotein convertase subtilisin/kexin …
GO:0051046	regulation of secretion	5.86e-06	0.000385	1.55	6963	180	1950	78	[Hmgcr - 3-hydroxy-3-methylglutaryl-coa reductase, Adrbk1 - adrenergic, beta, receptor kinase 1, Nf1 - neurofibromin 1, Adam9 - adam metallopeptidase domain 9, Cdk5r2 - cyclin-dependent kinase 5, regulatory subunit 2 (p39), Grm8 - glutamate receptor, metabotropic 8, Scamp5 - secretory carrier membrane protein 5, Srcin1 - src kinase signaling inhibitor 1, Acsl4 - acyl-coa synthetase long-chain fam…
GO:0010740	positive regulation of intracellular protein kinase cascade	5.9e-06	0.000385	1.61	6963	149	1950	67	[Hmgcr - 3-hydroxy-3-methylglutaryl-coa reductase, Ndfip2 - nedd4 family interacting protein 2, Tmem9b - tmem9 domain family, member b, Mtdh - metadherin, Taok3 - tao kinase 3, Arl2bp - adp-ribosylation factor-like 2 binding protein, Fgfr3 - fibroblast growth factor receptor 3, C1qtnf1 - c1q and tumor necrosis factor related protein 1, Ptprj - protein tyrosine phosphatase, receptor type, j, Tmed4…
GO:0051050	positive regulation of transport	6.12e-06	0.000397	1.46	6963	244	1950	100	[Creb3 - camp responsive element binding protein 3, Cdk5r2 - cyclin-dependent kinase 5, regulatory subunit 2 (p39), P2rx4 - purinergic receptor p2x, ligand-gated ion channel 4, Ahcyl1 - adenosylhomocysteinase-like 1, Adcyap1r1 - adenylate cyclase activating polypeptide 1 receptor 1, Slc6a1 - solute carrier family 6 (neurotransmitter transporter, gaba), member 1, Magi2 - membrane associated guanyl…
GO:0015807	L-amino acid transport	6.21e-06	0.0004	2.64	6963	23	1950	17	[Slc7a10 - solute carrier family 7 (neutral amino acid transporter light chain, asc system), member 10, Serinc3 - serine incorporator 3, Arl6ip5 - adp-ribosylation-like factor 6 interacting protein 5, Slc17a7 - solute carrier family 17 (sodium-dependent inorganic phosphate cotransporter), member 7, Cln8 - ceroid-lipofuscinosis, neuronal 8 (epilepsy, progressive with mental retardation), Slc1a2 - …
GO:0007409	axonogenesis	6.26e-06	0.0004	1.81	6963	87	1950	44	[Apoe - apolipoprotein e, Plxna4a - plexin a4, a, Mapt - microtubule-associated protein tau, Nptx1 - neuronal pentraxin i, Pip5k1c - phosphatidylinositol-4-phosphate 5-kinase, type i, gamma, Map2 - microtubule-associated protein 2, Ptprz1 - protein tyrosine phosphatase, receptor-type, z polypeptide 1, Calu - calumenin, Atl1 - atlastin gtpase 1, Fgfr3 - fibroblast growth factor receptor 3, Rab8a -…
GO:0050731	positive regulation of peptidyl-tyrosine phosphorylation	6.28e-06	0.000398	2.26	6963	38	1950	24	[Igf2 - insulin-like growth factor 2, Igf1 - insulin-like growth factor 1, Erbb4 - v-erb-a erythroblastic leukemia viral oncogene homolog 4 (avian), Kitlg - kit ligand, Sema4d - sema domain, immunoglobulin domain (ig), transmembrane domain (tm) and short cytoplasmic domain, (semaphorin) 4d, Ppap2b - phosphatidic acid phosphatase type 2b, Gas6 - growth arrest specific 6, Lrp8 - low density lipopro…
GO:0008610	lipid biosynthetic process	6.6e-06	0.000416	1.59	6963	155	1950	69	[Cdipt - cdp-diacylglycerol--inositol 3-phosphatidyltransferase, Hmgcr - 3-hydroxy-3-methylglutaryl-coa reductase, Lpcat1 - lysophosphatidylcholine acyltransferase 1, Agpat6 - 1-acylglycerol-3-phosphate o-acyltransferase 6 (lysophosphatidic acid acyltransferase, zeta), Degs1 - degenerative spermatocyte homolog 1, lipid desaturase (drosophila), Acsl4 - acyl-coa synthetase long-chain family member …
GO:2000463	positive regulation of excitatory postsynaptic membrane potential	7.27e-06	0.000455	3.27	6963	12	1950	11	[Pten - phosphatase and tensin homolog, Nlgn2 - neuroligin 2, Nrxn1 - neurexin 1, Nlgn3 - neuroligin 3, Dlg4 - discs, large homolog 4 (drosophila), Grin1 - glutamate receptor, ionotropic, n-methyl d-aspartate 1, Shank1 - sh3 and multiple ankyrin repeat domains 1, Grin2a - glutamate receptor, ionotropic, n-methyl d-aspartate 2a, Reln - reelin, Shank3 - sh3 and multiple ankyrin repeat domains 3, Nl…
GO:0007613	memory	9.81e-06	0.000609	2.08	6963	48	1950	28	[Igf2 - insulin-like growth factor 2, Igf1 - insulin-like growth factor 1, Shank1 - sh3 and multiple ankyrin repeat domains 1, S100b - s100 calcium binding protein b, Glud1 - glutamate dehydrogenase 1, Ntrk2 - neurotrophic tyrosine kinase, receptor, type 2, Adcy1 - adenylate cyclase 1 (brain), Grin1 - glutamate receptor, ionotropic, n-methyl d-aspartate 1, Cnr1 - cannabinoid receptor 1 (brain), A…
GO:0051968	positive regulation of synaptic transmission, glutamatergic	1.05e-05	0.000645	3.57	6963	9	1950	9	[Ntrk2 - neurotrophic tyrosine kinase, receptor, type 2, Nlgn2 - neuroligin 2, Nrxn1 - neurexin 1, Nlgn3 - neuroligin 3, Tnr - tenascin r (restrictin, janusin), Reln - reelin, Shank3 - sh3 and multiple ankyrin repeat domains 3, Gria4 - glutamate receptor, ionotrophic, ampa 4, Nlgn1 - neuroligin 1]
GO:0016486	peptide hormone processing	1.05e-05	0.000641	3.57	6963	9	1950	9	[Pcsk6 - proprotein convertase subtilisin/kexin type 6, Ece1 - endothelin converting enzyme 1, Pcsk2 - proprotein convertase subtilisin/kexin type 2, Atp6ap2 - atpase, h+ transporting, lysosomal accessory protein 2, Ece2 - endothelin-converting enzyme 2, Scg5 - secretogranin v (7b2 protein), Pcsk1n - proprotein convertase subtilisin/kexin type 1 inhibitor, Cpe - carboxypeptidase e, Furin - furin …
GO:0055065	metal ion homeostasis	1.11e-05	0.000674	1.66	6963	118	1950	55	[Mcoln1 - mucolipin 1, Ero1l - ero1-like (s. cerevisiae), Hexb - hexosaminidase b, Nptn - neuroplastin, Ednrb - endothelin receptor type b, Grin1 - glutamate receptor, ionotropic, n-methyl d-aspartate 1, Ryr2 - ryanodine receptor 2, cardiac, Gja1 - gap junction protein, alpha 1, Crhr1 - corticotropin releasing hormone receptor 1, Trpc1 - transient receptor potential cation channel, subfamily c, m…
GO:2000311	regulation of alpha-amino-3-hydroxy-5-methyl-4-isoxazole propionate selective glutamate receptor activity	1.14e-05	0.00069	3.06	6963	14	1950	12	[Nlgn2 - neuroligin 2, Mink1 - misshapen-like kinase 1, Nrxn1 - neurexin 1, Nlgn3 - neuroligin 3, Shank1 - sh3 and multiple ankyrin repeat domains 1, Cacng2 - calcium channel, voltage-dependent, gamma subunit 2, Cacng7 - calcium channel, voltage-dependent, gamma subunit 7, Mapk8ip2 - mitogen-activated protein kinase 8 interacting protein 2, Reln - reelin, Cnih2 - cornichon homolog 2 (drosophila),…
GO:0006875	cellular metal ion homeostasis	1.27e-05	0.000766	1.67	6963	113	1950	53	[Mcoln1 - mucolipin 1, Ero1l - ero1-like (s. cerevisiae), Hexb - hexosaminidase b, Nptn - neuroplastin, Ednrb - endothelin receptor type b, Grin1 - glutamate receptor, ionotropic, n-methyl d-aspartate 1, Ryr2 - ryanodine receptor 2, cardiac, Gja1 - gap junction protein, alpha 1, Crhr1 - corticotropin releasing hormone receptor 1, Trpc1 - transient receptor potential cation channel, subfamily c, m…
GO:0009967	positive regulation of signal transduction	1.39e-05	0.000827	1.39	6963	308	1950	120	[Hmgcr - 3-hydroxy-3-methylglutaryl-coa reductase, P2rx4 - purinergic receptor p2x, ligand-gated ion channel 4, Bmpr2 - bone morphogenetic protein receptor, type ii (serine/threonine kinase), Plxnb1 - plexin b1, Taok3 - tao kinase 3, Skor2-ps1 - ski family transcriptional corepressor 2, pseudogene 1, Arl2bp - adp-ribosylation factor-like 2 binding protein, Fgfr3 - fibroblast growth factor recepto…
GO:0008038	neuron recognition	1.45e-05	0.000857	2.9	6963	16	1950	13	[Ncam2 - neural cell adhesion molecule 2, Rtn4 - reticulon 4, Robo2 - roundabout homolog 2 (drosophila), Dscam - down syndrome cell adhesion molecule, Celsr3 - cadherin, egf lag seven-pass g-type receptor 3 (flamingo homolog, drosophila), Dynll2 - dynein light chain lc8-type 2, App - amyloid beta (a4) precursor protein, Ephb2 - eph receptor b2, Robo1 - roundabout homolog 1 (drosophila), Amigo1 - …
GO:0007187	G-protein coupled receptor signaling pathway, coupled to cyclic nucleotide second messenger	1.45e-05	0.000852	2.47	6963	26	1950	18	[Adcy2 - adenylate cyclase 2 (brain), Grm4 - glutamate receptor, metabotropic 4, Gnai2 - guanine nucleotide binding protein (g protein), alpha inhibiting activity polypeptide 2, Grm8 - glutamate receptor, metabotropic 8, Adcy5 - adenylate cyclase 5, Gnaz - guanine nucleotide binding protein (g protein), alpha z polypeptide, S1pr1 - sphingosine-1-phosphate receptor 1, Grm3 - glutamate receptor, me…
GO:0032940	secretion by cell	1.49e-05	0.000871	1.62	6963	130	1950	59	[Syt2 - synaptotagmin ii, Tyro3 - tyro3 protein tyrosine kinase, Scamp5 - secretory carrier membrane protein 5, Srcin1 - src kinase signaling inhibitor 1, Cbln1 - cerebellin 1 precursor, Steap2 - steap family member 2, metalloreductase, Ntrk2 - neurotrophic tyrosine kinase, receptor, type 2, Sdf4 - stromal cell derived factor 4, Pcsk6 - proprotein convertase subtilisin/kexin type 6, Neurod1 - neu…
GO:0006813	potassium ion transport	1.57e-05	0.000914	2.53	6963	24	1950	17	[Slc24a3 - solute carrier family 24 (sodium/potassium/calcium exchanger), member 3, Kcnd2 - potassium voltage-gated channel, shal-related subfamily, member 2, Abcc8 - atp-binding cassette, subfamily c (cftr/mrp), member 8, Kcnma1 - potassium large conductance calcium-activated channel, subfamily m, alpha member 1, Atp1a3 - atpase, na+/k+ transporting, alpha 3 polypeptide, Atp1a1 - atpase, na+/k+ …
GO:0060341	regulation of cellular localization	1.6e-05	0.000922	1.38	6963	324	1950	125	[Hmgcr - 3-hydroxy-3-methylglutaryl-coa reductase, Nf1 - neurofibromin 1, Creb3 - camp responsive element binding protein 3, Cdk5r2 - cyclin-dependent kinase 5, regulatory subunit 2 (p39), P2rx4 - purinergic receptor p2x, ligand-gated ion channel 4, Grm8 - glutamate receptor, metabotropic 8, Thra - thyroid hormone receptor alpha, Appl1 - adaptor protein, phosphotyrosine interaction, ph domain and…
GO:0044723	single-organism carbohydrate metabolic process	1.63e-05	0.000936	1.5	6963	190	1950	80	[Slc23a2 - solute carrier family 23 (nucleobase transporters), member 2, Pomgnt1 - protein o-linked mannose beta1,2-n-acetylglucosaminyltransferase, B3gat1 - beta-1,3-glucuronyltransferase 1 (glucuronosyltransferase p), Acadm - acyl-coa dehydrogenase, c-4 to c-12 straight chain, B3gnt1 - udp-glcnac:betagal beta-1,3-n-acetylglucosaminyltransferase 1, Fuca1 - fucosidase, alpha-l- 1, tissue, Akt2 - …
GO:0050807	regulation of synapse organization	1.72e-05	0.00098	2.24	6963	35	1950	22	[Chrnb2 - cholinergic receptor, nicotinic, beta 2 (neuronal), Nedd4 - neural precursor cell expressed, developmentally down-regulated 4, Pvrl1 - poliovirus receptor-related 1, Camk2b - calcium/calmodulin-dependent protein kinase ii beta, Lphn1 - latrophilin 1, Dmpk - dystrophia myotonica-protein kinase, Cbln1 - cerebellin 1 precursor, Nlgn1 - neuroligin 1, Ephb2 - eph receptor b2, Lrrc4b - leucin…
GO:0008366	axon ensheathment	1.81e-05	0.00103	2.13	6963	42	1950	25	[Nf1 - neurofibromin 1, Qk - quaking, Fgfr3 - fibroblast growth factor receptor 3, Eif2b5 - eukaryotic translation initiation factor 2b, subunit 5 epsilon, Hexb - hexosaminidase b, Scd - stearoyl-coa desaturase (delta-9-desaturase), Amigo1 - adhesion molecule with ig like domain 1, Cntn2 - contactin 2 (axonal), Atrn - attractin, Eif2b4 - eukaryotic translation initiation factor 2b, subunit 4 delt…
GO:0007272	ensheathment of neurons	1.81e-05	0.00102	2.13	6963	42	1950	25	[Nf1 - neurofibromin 1, Qk - quaking, Hexb - hexosaminidase b, Eif2b5 - eukaryotic translation initiation factor 2b, subunit 5 epsilon, Fgfr3 - fibroblast growth factor receptor 3, Scd - stearoyl-coa desaturase (delta-9-desaturase), Amigo1 - adhesion molecule with ig like domain 1, Cntn2 - contactin 2 (axonal), Atrn - attractin, Eif2b4 - eukaryotic translation initiation factor 2b, subunit 4 delt…
GO:0010817	regulation of hormone levels	1.85e-05	0.00104	1.94	6963	59	1950	32	[Scpep1 - serine carboxypeptidase 1, Atp6ap2 - atpase, h+ transporting, lysosomal accessory protein 2, Pcsk2 - proprotein convertase subtilisin/kexin type 2, Rims2 - regulating synaptic membrane exocytosis 2, Ece2 - endothelin-converting enzyme 2, Cpe - carboxypeptidase e, Cdk16 - cyclin-dependent kinase 16, Pcsk6 - proprotein convertase subtilisin/kexin type 6, Neurod1 - neurogenic differentiati…
GO:0048584	positive regulation of response to stimulus	1.89e-05	0.00105	1.33	6963	402	1950	150	[Hmgcr - 3-hydroxy-3-methylglutaryl-coa reductase, Creb3 - camp responsive element binding protein 3, Adam10 - adam metallopeptidase domain 10, Bmpr2 - bone morphogenetic protein receptor, type ii (serine/threonine kinase), P2rx4 - purinergic receptor p2x, ligand-gated ion channel 4, Plxnb1 - plexin b1, Taok3 - tao kinase 3, Skor2-ps1 - ski family transcriptional corepressor 2, pseudogene 1, Arl2…
GO:0019932	second-messenger-mediated signaling	2.08e-05	0.00115	2.05	6963	47	1950	27	[Ppp1r9b - protein phosphatase 1, regulatory subunit 9b, Apoe - apolipoprotein e, Slc8a1 - solute carrier family 8 (sodium/calcium exchanger), member 1, Rims2 - regulating synaptic membrane exocytosis 2, Adcyap1r1 - adenylate cyclase activating polypeptide 1 receptor 1, Dmpk - dystrophia myotonica-protein kinase, Epha5 - epha5, Ntrk2 - neurotrophic tyrosine kinase, receptor, type 2, Odz2 - odz, o…
GO:0042552	myelination	2.21e-05	0.00121	2.14	6963	40	1950	24	[Nf1 - neurofibromin 1, Mal - mal, t-cell differentiation protein, Afg3l2 - afg3 atpase family gene 3-like 2 (s. cerevisiae), Qk - quaking, Plp1 - proteolipid protein 1, Nfasc - neurofascin, Scn2a1 - sodium channel, voltage-gated, type ii, alpha 1, Fgfr3 - fibroblast growth factor receptor 3, Eif2b5 - eukaryotic translation initiation factor 2b, subunit 5 epsilon, Hexb - hexosaminidase b, Tsc1 - …
GO:0007204	elevation of cytosolic calcium ion concentration	2.21e-05	0.00121	2.14	6963	40	1950	24	[Hrh3 - histamine receptor h3, Cacna1g - calcium channel, voltage-dependent, t type, alpha 1g subunit, Pkd1 - polycystic kidney disease 1 homolog (human), Pkd2 - polycystic kidney disease 2 homolog (human), Slc8a1 - solute carrier family 8 (sodium/calcium exchanger), member 1, Cacna1i - calcium channel, voltage-dependent, t type, alpha 1i subunit, Itgav - integrin, alpha v, Mcoln1 - mucolipin 1, …
GO:0051480	cytosolic calcium ion homeostasis	2.25e-05	0.00122	1.99	6963	52	1950	29	[Cacna1g - calcium channel, voltage-dependent, t type, alpha 1g subunit, Slc8a1 - solute carrier family 8 (sodium/calcium exchanger), member 1, Itgav - integrin, alpha v, Mcoln1 - mucolipin 1, Ero1l - ero1-like (s. cerevisiae), S1pr1 - sphingosine-1-phosphate receptor 1, Nptn - neuroplastin, Ednrb - endothelin receptor type b, Ryr2 - ryanodine receptor 2, cardiac, Asph - aspartate-beta-hydroxylas…
GO:0051604	protein maturation	2.25e-05	0.00121	1.99	6963	52	1950	29	[Spcs1 - signal peptidase complex subunit 1 homolog (s. cerevisiae), Ncstn - nicastrin, Fkrp - fukutin related protein, Atp6ap2 - atpase, h+ transporting, lysosomal accessory protein 2, Pcsk2 - proprotein convertase subtilisin/kexin type 2, Ece2 - endothelin-converting enzyme 2, Spcs3 - signal peptidase complex subunit 3 homolog (s. cerevisiae), Cpe - carboxypeptidase e, Plat - plasminogen activa…
GO:0042330	taxis	2.31e-05	0.00124	1.68	6963	104	1950	49	[B3gnt2 - udp-glcnac:betagal beta-1,3-n-acetylglucosaminyltransferase 2, Epha7 - eph receptor a7, Ephb2 - eph receptor b2, Ptprj - protein tyrosine phosphatase, receptor type, j, Epha5 - epha5, Odz2 - odz, odd oz/ten-m homolog 2 (drosophila), Robo1 - roundabout homolog 1 (drosophila), Ednrb - endothelin receptor type b, Cntn2 - contactin 2 (axonal), Mycbp2 - myc binding protein 2, L1cam - l1 cell…
GO:0019228	regulation of action potential in neuron	2.4e-05	0.00128	3.25	6963	11	1950	10	[P2rx4 - purinergic receptor p2x, ligand-gated ion channel 4, Kcnmb4 - potassium large conductance calcium-activated channel, subfamily m, beta member 4, Kcnma1 - potassium large conductance calcium-activated channel, subfamily m, alpha member 1, Scn3a - sodium channel, voltage-gated, type iii, alpha, Scn1a - sodium channel, voltage-gated, type i, alpha, Dpp6 - dipeptidylpeptidase 6, Ank3 - ankyr…
GO:0071705	nitrogen compound transport	2.57e-05	0.00136	1.57	6963	146	1950	64	[Tap2 - transporter 2, atp-binding cassette, sub-family b (mdr/tap), Cln8 - ceroid-lipofuscinosis, neuronal 8 (epilepsy, progressive with mental retardation), Slc35a1 - solute carrier family 35 (cmp-sialic acid transporter), member a1, Pom121 - pom121 membrane glycoprotein, Slc1a2 - solute carrier family 1 (glial high affinity glutamate transporter), member 2, Slc6a1 - solute carrier family 6 (ne…
GO:0040017	positive regulation of locomotion	2.74e-05	0.00144	1.66	6963	110	1950	51	[Adam9 - adam metallopeptidase domain 9, Creb3 - camp responsive element binding protein 3, Adam10 - adam metallopeptidase domain 10, Akt2 - v-akt murine thymoma viral oncogene homolog 2, Bmpr2 - bone morphogenetic protein receptor, type ii (serine/threonine kinase), Selk - selenoprotein k, Ptprj - protein tyrosine phosphatase, receptor type, j, Src - v-src sarcoma (schmidt-ruppin a-2) viral onco…
GO:0023061	signal release	2.91e-05	0.00152	1.95	6963	55	1950	30	[Rims2 - regulating synaptic membrane exocytosis 2, Ppt1 - palmitoyl-protein thioesterase 1, Cdk16 - cyclin-dependent kinase 16, Ntrk2 - neurotrophic tyrosine kinase, receptor, type 2, Neurod1 - neurogenic differentiation 1, Apba1 - amyloid beta (a4) precursor protein-binding, family a, member 1, Syt4 - synaptotagmin iv, Nrxn3 - neurexin 3, Grm4 - glutamate receptor, metabotropic 4, Rab15 - rab15…
GO:0022603	regulation of anatomical structure morphogenesis	3.05e-05	0.00159	1.41	6963	258	1950	102	[Nf1 - neurofibromin 1, Bai3 - brain-specific angiogenesis inhibitor 3, Hopx - hop homeobox, Plxnb1 - plexin b1, Cfdp1 - craniofacial development protein 1, Cpe - carboxypeptidase e, Skor2-ps1 - ski family transcriptional corepressor 2, pseudogene 1, Fmnl1 - formin-like 1, Srcin1 - src kinase signaling inhibitor 1, Ephb2 - eph receptor b2, Maged1 - melanoma antigen, family d, 1, Ntrk2 - neurotrop…
GO:0030433	ER-associated protein catabolic process	3.21e-05	0.00166	2.38	6963	27	1950	18	[Dnajb9 - dnaj (hsp40) homolog, subfamily b, member 9, Hsp90b1 - heat shock protein 90, beta, member 1, Foxred2 - fad-dependent oxidoreductase domain containing 2, Amfr - autocrine motility factor receptor, Syvn1 - synovial apoptosis inhibitor 1, synoviolin, Dnajc10 - dnaj (hsp40) homolog, subfamily c, member 10, Os9 - osteosarcoma amplified 9, Edem1 - er degradation enhancer, mannosidase alpha-l…
GO:0050920	regulation of chemotaxis	3.26e-05	0.00167	2.18	6963	36	1950	22	[Il16 - interleukin 16, Plxna4a - plexin a4, a, Calr - calreticulin, Ntrk3 - neurotrophic tyrosine kinase, receptor, type 3, Creb3 - camp responsive element binding protein 3, Adam10 - adam metallopeptidase domain 10, Akt2 - v-akt murine thymoma viral oncogene homolog 2, Dscam - down syndrome cell adhesion molecule, Cdh13 - cadherin 13, Gas6 - growth arrest specific 6, Lyn - v-yes-1 yamaguchi sar…
GO:0032101	regulation of response to external stimulus	3.41e-05	0.00174	1.62	6963	119	1950	54	[Hmgcr - 3-hydroxy-3-methylglutaryl-coa reductase, A2m - alpha-2-macroglobulin, Creb3 - camp responsive element binding protein 3, Adam10 - adam metallopeptidase domain 10, Akt2 - v-akt murine thymoma viral oncogene homolog 2, Grid2 - glutamate receptor, ionotropic, delta 2, Tyro3 - tyro3 protein tyrosine kinase, Hopx - hop homeobox, Ptprj - protein tyrosine phosphatase, receptor type, j, Sema7a …
GO:0015698	inorganic anion transport	3.63e-05	0.00185	2.43	6963	25	1950	17	[Clcn4 - chloride channel 4, Clcn3 - chloride channel 3, Slc17a7 - solute carrier family 17 (sodium-dependent inorganic phosphate cotransporter), member 7, Clic4 - chloride intracellular channel 4, Clcn2 - chloride channel 2, Slc12a5 - solute carrier family 12 (potassium-chloride transporter), member 5, Ankh - ankylosis, progressive homolog (mouse), Glrb - glycine receptor, beta, Pcyox1 - prenylc…
GO:0006836	neurotransmitter transport	3.65e-05	0.00185	1.95	6963	53	1950	29	[Rims2 - regulating synaptic membrane exocytosis 2, Slc32a1 - solute carrier family 32 (gaba vesicular transporter), member 1, Sv2c - synaptic vesicle glycoprotein 2c, Slc6a13 - solute carrier family 6 (neurotransmitter transporter, gaba), member 13, Slc6a11 - solute carrier family 6 (neurotransmitter transporter, gaba), member 11, Cln8 - ceroid-lipofuscinosis, neuronal 8 (epilepsy, progressive w…
GO:0044704	single-organism reproductive behavior	3.93e-05	0.00197	2.21	6963	34	1950	21	[Hmgcr - 3-hydroxy-3-methylglutaryl-coa reductase, Nf1 - neurofibromin 1, Chrnb2 - cholinergic receptor, nicotinic, beta 2 (neuronal), Serpine2 - serpin peptidase inhibitor, clade e, member 2, Cacna1e - calcium channel, voltage-dependent, r type, alpha 1e subunit, Shank1 - sh3 and multiple ankyrin repeat domains 1, Atp1a3 - atpase, na+/k+ transporting, alpha 3 polypeptide, Slc12a5 - solute carrie…
GO:0006935	chemotaxis	3.98e-05	0.00199	1.66	6963	103	1950	48	[Il16 - interleukin 16, Plxna4a - plexin a4, a, Pip5k1c - phosphatidylinositol-4-phosphate 5-kinase, type i, gamma, B3gnt2 - udp-glcnac:betagal beta-1,3-n-acetylglucosaminyltransferase 2, Epha7 - eph receptor a7, Ephb2 - eph receptor b2, Ptprj - protein tyrosine phosphatase, receptor type, j, Epha5 - epha5, Odz2 - odz, odd oz/ten-m homolog 2 (drosophila), Chn1 - chimerin (chimaerin) 1, Ednrb - en…
GO:0015718	monocarboxylic acid transport	4.04e-05	0.00201	2.48	6963	23	1950	16	[Grm4 - glutamate receptor, metabotropic 4, Slc27a1 - solute carrier family 27 (fatty acid transporter), member 1, Abcd3 - atp-binding cassette, subfamily d (ald), member 3, Slc32a1 - solute carrier family 32 (gaba vesicular transporter), member 1, Acsl4 - acyl-coa synthetase long-chain family member 4, Slc6a1 - solute carrier family 6 (neurotransmitter transporter, gaba), member 1, Ace - angiote…
GO:0010627	regulation of intracellular protein kinase cascade	4.05e-05	0.002	1.37	6963	302	1950	116	[Hmgcr - 3-hydroxy-3-methylglutaryl-coa reductase, Nf1 - neurofibromin 1, Atp6ap2 - atpase, h+ transporting, lysosomal accessory protein 2, Taok3 - tao kinase 3, Arl2bp - adp-ribosylation factor-like 2 binding protein, Fgfr3 - fibroblast growth factor receptor 3, Epha7 - eph receptor a7, Magi2 - membrane associated guanylate kinase, ww and pdz domain containing 2, C1qtnf1 - c1q and tumor necrosis…
GO:0051051	negative regulation of transport	4.07e-05	0.002	1.59	6963	128	1950	57	[Hmgcr - 3-hydroxy-3-methylglutaryl-coa reductase, Ndfip2 - nedd4 family interacting protein 2, Nf1 - neurofibromin 1, Mapt - microtubule-associated protein tau, Creb3 - camp responsive element binding protein 3, Akt2 - v-akt murine thymoma viral oncogene homolog 2, Plcb4 - phospholipase c, beta 4, Scamp5 - secretory carrier membrane protein 5, Thra - thyroid hormone receptor alpha, Ywhab - tyros…
GO:0050793	regulation of developmental process	4.29e-05	0.0021	1.25	6963	627	1950	219	[Hmgcr - 3-hydroxy-3-methylglutaryl-coa reductase, Bai3 - brain-specific angiogenesis inhibitor 3, Adam10 - adam metallopeptidase domain 10, Grid2 - glutamate receptor, ionotropic, delta 2, Hopx - hop homeobox, Cpe - carboxypeptidase e, Fmnl1 - formin-like 1, Fgfr3 - fibroblast growth factor receptor 3, Cbln1 - cerebellin 1 precursor, Adra2b - adrenergic, alpha-2b-, receptor, Ephb2 - eph receptor…
GO:0006665	sphingolipid metabolic process	4.36e-05	0.00212	2.02	6963	46	1950	26	[Psap - prosaposin, Ugcg - udp-glucose ceramide glucosyltransferase, Cerk - ceramide kinase, Cln8 - ceroid-lipofuscinosis, neuronal 8 (epilepsy, progressive with mental retardation), Hexb - hexosaminidase b, Kdsr - 3-ketodihydrosphingosine reductase, Aldh5a1 - aldehyde dehydrogenase 5 family, member a1, Cers1 - ceramide synthase 1, Cers5 - ceramide synthase 5, Sgms1 - sphingomyelin synthase 1, Sm…
GO:0009581	detection of external stimulus	4.37e-05	0.00211	2.55	6963	21	1950	15	[Serpine2 - serpin peptidase inhibitor, clade e, member 2, Plcb4 - phospholipase c, beta 4, Grm8 - glutamate receptor, metabotropic 8, Pkd1 - polycystic kidney disease 1 homolog (human), Pkd2 - polycystic kidney disease 2 homolog (human), Grin2b - glutamate receptor, ionotropic, n-methyl d-aspartate 2b, Atp2b2 - atpase, ca++ transporting, plasma membrane 2, Ephb1 - eph receptor b1, Fyn - fyn onco…
GO:0006509	membrane protein ectodomain proteolysis	4.56e-05	0.0022	2.73	6963	17	1950	13	[Adam9 - adam metallopeptidase domain 9, Erap1 - endoplasmic reticulum aminopeptidase 1, Ncstn - nicastrin, Adam10 - adam metallopeptidase domain 10, Sppl2b - signal peptide peptidase-like 2b, Sppl2a - signal peptide peptidase-like 2a, Psenen - presenilin enhancer 2 homolog (c. elegans), Myh9 - myosin, heavy chain 9, non-muscle, Adam19 - adam metallopeptidase domain 19, Psen1 - presenilin 1, Adam…
GO:1900449	regulation of glutamate receptor signaling pathway	4.56e-05	0.00218	2.73	6963	17	1950	13	[Shank1 - sh3 and multiple ankyrin repeat domains 1, Cacng7 - calcium channel, voltage-dependent, gamma subunit 7, Mapk8ip2 - mitogen-activated protein kinase 8 interacting protein 2, Cnih2 - cornichon homolog 2 (drosophila), Nlgn1 - neuroligin 1, Mink1 - misshapen-like kinase 1, Nlgn2 - neuroligin 2, Nlgn3 - neuroligin 3, Nrxn1 - neurexin 1, Dlg4 - discs, large homolog 4 (drosophila), Cacng2 - c…
GO:0003333	amino acid transmembrane transport	4.56e-05	0.00217	2.73	6963	17	1950	13	[Slc7a10 - solute carrier family 7 (neutral amino acid transporter light chain, asc system), member 10, Slc32a1 - solute carrier family 32 (gaba vesicular transporter), member 1, Slc1a2 - solute carrier family 1 (glial high affinity glutamate transporter), member 2, Slc1a3 - solute carrier family 1 (glial high affinity glutamate transporter), member 3, Slc43a2 - solute carrier family 43, member 2…
GO:0051240	positive regulation of multicellular organismal process	4.57e-05	0.00216	1.49	6963	180	1950	75	[Bmpr2 - bone morphogenetic protein receptor, type ii (serine/threonine kinase), Atp6ap2 - atpase, h+ transporting, lysosomal accessory protein 2, Nptn - neuroplastin, Slc1a3 - solute carrier family 1 (glial high affinity glutamate transporter), member 3, Adra2b - adrenergic, alpha-2b-, receptor, Apoa5 - apolipoprotein a-v, Maged1 - melanoma antigen, family d, 1, Ntrk2 - neurotrophic tyrosine kin…
GO:0019233	sensory perception of pain	4.71e-05	0.00222	2.23	6963	32	1950	20	[Chrnb2 - cholinergic receptor, nicotinic, beta 2 (neuronal), Mme - membrane metallo-endopeptidase, P2rx4 - purinergic receptor p2x, ligand-gated ion channel 4, Grm8 - glutamate receptor, metabotropic 8, Cacna1e - calcium channel, voltage-dependent, r type, alpha 1e subunit, Scn3a - sodium channel, voltage-gated, type iii, alpha, Dlg2 - discs, large homolog 2 (drosophila), Grin2a - glutamate rece…
GO:0007420	brain development	4.92e-05	0.0023	1.56	6963	140	1950	61	[Nf1 - neurofibromin 1, Aatk - apoptosis-associated tyrosine kinase, Bmpr2 - bone morphogenetic protein receptor, type ii (serine/threonine kinase), Thra - thyroid hormone receptor alpha, Tspan2 - tetraspanin 2, Slc6a11 - solute carrier family 6 (neurotransmitter transporter, gaba), member 11, Epha7 - eph receptor a7, Sgk196 - protein kinase-like protein sgk196, Tmem132a - transmembrane protein 1…
GO:0032989	cellular component morphogenesis	5.36e-05	0.0025	1.43	6963	228	1950	91	[Mapt - microtubule-associated protein tau, Nptx1 - neuronal pentraxin i, Tyro3 - tyro3 protein tyrosine kinase, Plxnb1 - plexin b1, Atl1 - atlastin gtpase 1, Srcin1 - src kinase signaling inhibitor 1, Fgfr3 - fibroblast growth factor receptor 3, Slc1a3 - solute carrier family 1 (glial high affinity glutamate transporter), member 3, Rab8a - rab8a, member ras oncogene family, Ephb2 - eph receptor …
GO:0032990	cell part morphogenesis	5.39e-05	0.0025	1.49	6963	172	1950	72	[Mapt - microtubule-associated protein tau, Nptx1 - neuronal pentraxin i, Plxnb1 - plexin b1, Atl1 - atlastin gtpase 1, Fgfr3 - fibroblast growth factor receptor 3, Rab8a - rab8a, member ras oncogene family, Ephb2 - eph receptor b2, Epha5 - epha5, Adcy1 - adenylate cyclase 1 (brain), Brsk2 - br serine/threonine kinase 2, Map1b - microtubule-associated protein 1b, Sept7 - septin 7, Cntn2 - contact…
GO:2000021	regulation of ion homeostasis	5.41e-05	0.0025	1.84	6963	64	1950	33	[Scn4b - sodium channel, voltage-gated, type iv, beta, P2rx4 - purinergic receptor p2x, ligand-gated ion channel 4, Cacna1g - calcium channel, voltage-dependent, t type, alpha 1g subunit, Slc8a1 - solute carrier family 8 (sodium/calcium exchanger), member 1, Mcoln1 - mucolipin 1, Adcyap1r1 - adenylate cyclase activating polypeptide 1 receptor 1, Ero1l - ero1-like (s. cerevisiae), Ap3d1 - adaptor-…
GO:0010469	regulation of receptor activity	5.42e-05	0.00249	2.03	6963	44	1950	25	[Igf2 - insulin-like growth factor 2, Shank1 - sh3 and multiple ankyrin repeat domains 1, Ptprj - protein tyrosine phosphatase, receptor type, j, Adra2b - adrenergic, alpha-2b-, receptor, Adam17 - adam metallopeptidase domain 17, Fnta - farnesyltransferase, caax box, alpha, Cacng2 - calcium channel, voltage-dependent, gamma subunit 2, Psen2 - presenilin 2, Asph - aspartate-beta-hydroxylase, Adora…
GO:0019098	reproductive behavior	5.42e-05	0.00247	2.03	6963	44	1950	25	[Hmgcr - 3-hydroxy-3-methylglutaryl-coa reductase, Nf1 - neurofibromin 1, Thra - thyroid hormone receptor alpha, Shank1 - sh3 and multiple ankyrin repeat domains 1, Slc1a2 - solute carrier family 1 (glial high affinity glutamate transporter), member 2, Hexb - hexosaminidase b, Grin1 - glutamate receptor, ionotropic, n-methyl d-aspartate 1, Crhr1 - corticotropin releasing hormone receptor 1, Chrnb…
GO:0030030	cell projection organization	5.78e-05	0.00263	1.37	6963	298	1950	114	[Prickle2 - prickle homolog 2 (drosophila), Plxnb1 - plexin b1, Ccdc64 - coiled-coil domain containing 64, Atl1 - atlastin gtpase 1, Fgfr3 - fibroblast growth factor receptor 3, Ephb2 - eph receptor b2, Epha5 - epha5, Adcy1 - adenylate cyclase 1 (brain), Brsk2 - br serine/threonine kinase 2, Cntn2 - contactin 2 (axonal), Sept7 - septin 7, Actb - actin, beta, Cntn4 - contactin 4, Mycbp2 - myc bind…
GO:0008306	associative learning	5.92e-05	0.00267	2.12	6963	37	1950	22	[Hmgcr - 3-hydroxy-3-methylglutaryl-coa reductase, Nf1 - neurofibromin 1, Chrnb2 - cholinergic receptor, nicotinic, beta 2 (neuronal), Fos - fbj osteosarcoma oncogene, Cacna1e - calcium channel, voltage-dependent, r type, alpha 1e subunit, Shank1 - sh3 and multiple ankyrin repeat domains 1, Atp1a3 - atpase, na+/k+ transporting, alpha 3 polypeptide, Grin2b - glutamate receptor, ionotropic, n-methy…
GO:0006869	lipid transport	6.74e-05	0.00303	2.04	6963	42	1950	24	[Apoe - apolipoprotein e, Psap - prosaposin, Slc27a1 - solute carrier family 27 (fatty acid transporter), member 1, Abcd3 - atp-binding cassette, subfamily d (ald), member 3, Osbp2 - oxysterol binding protein 2, Pitpna - phosphatidylinositol transfer protein, alpha, Abca7 - atp-binding cassette, subfamily a (abc1), member 7, Acsl4 - acyl-coa synthetase long-chain family member 4, Ace - angiotensi…
GO:0008037	cell recognition	7.24e-05	0.00324	2.14	6963	35	1950	21	[Cct4 - chaperonin containing tcp1, subunit 4 (delta), Ncam2 - neural cell adhesion molecule 2, Rtn4 - reticulon 4, Robo2 - roundabout homolog 2 (drosophila), Celsr3 - cadherin, egf lag seven-pass g-type receptor 3 (flamingo homolog, drosophila), Dscam - down syndrome cell adhesion molecule, Clgn - calmegin, Dynll2 - dynein light chain lc8-type 2, Crtam - cytotoxic and regulatory t cell molecule,…
GO:0048265	response to pain	7.83e-05	0.00349	3.21	6963	10	1950	9	[Grik1 - glutamate receptor, ionotropic, kainate 1, Ednrb - endothelin receptor type b, Ret - ret proto-oncogene, Cacna1a - calcium channel, voltage-dependent, p/q type, alpha 1a subunit, Cacna1e - calcium channel, voltage-dependent, r type, alpha 1e subunit, Prkcg - protein kinase c, gamma, Grin2b - glutamate receptor, ionotropic, n-methyl d-aspartate 2b, Reln - reelin, Crhr1 - corticotropin rel…
GO:0035418	protein localization to synapse	7.83e-05	0.00347	3.21	6963	10	1950	9	[Nlgn2 - neuroligin 2, Dlgap1 - discs, large (drosophila) homolog-associated protein 1, Nrxn1 - neurexin 1, Dlg4 - discs, large homolog 4 (drosophila), Shank1 - sh3 and multiple ankyrin repeat domains 1, Reln - reelin, Nlgn1 - neuroligin 1, Klc1 - kinesin light chain 1, Accn1 - amiloride-sensitive cation channel 1, neuronal]
GO:0010033	response to organic substance	8.29e-05	0.00365	1.21	6963	773	1950	262	[Hmgcr - 3-hydroxy-3-methylglutaryl-coa reductase, A2m - alpha-2-macroglobulin, Adam10 - adam metallopeptidase domain 10, Acadm - acyl-coa dehydrogenase, c-4 to c-12 straight chain, P2rx4 - purinergic receptor p2x, ligand-gated ion channel 4, Acp2 - acid phosphatase 2, lysosomal, Adcyap1r1 - adenylate cyclase activating polypeptide 1 receptor 1, Fgfr3 - fibroblast growth factor receptor 3, Slc6a1…
GO:0051241	negative regulation of multicellular organismal process	8.32e-05	0.00365	1.61	6963	111	1950	50	[Adrbk1 - adrenergic, beta, receptor kinase 1, Hmgcr - 3-hydroxy-3-methylglutaryl-coa reductase, Bmpr2 - bone morphogenetic protein receptor, type ii (serine/threonine kinase), P2rx4 - purinergic receptor p2x, ligand-gated ion channel 4, Cpe - carboxypeptidase e, Slc6a1 - solute carrier family 6 (neurotransmitter transporter, gaba), member 1, Grid2ip - glutamate receptor, ionotropic, delta 2 (gri…
GO:0007188	adenylate cyclase-modulating G-protein coupled receptor signaling pathway	8.97e-05	0.00391	2.38	6963	24	1950	16	[Adcy2 - adenylate cyclase 2 (brain), Grm4 - glutamate receptor, metabotropic 4, Gnai2 - guanine nucleotide binding protein (g protein), alpha inhibiting activity polypeptide 2, Adcy5 - adenylate cyclase 5, Grm8 - glutamate receptor, metabotropic 8, Gnaz - guanine nucleotide binding protein (g protein), alpha z polypeptide, S1pr1 - sphingosine-1-phosphate receptor 1, Grm3 - glutamate receptor, me…
GO:2000147	positive regulation of cell motility	9.77e-05	0.00425	1.62	6963	106	1950	48	[Igf1 - insulin-like growth factor 1, Adam9 - adam metallopeptidase domain 9, Creb3 - camp responsive element binding protein 3, Adam10 - adam metallopeptidase domain 10, Akt2 - v-akt murine thymoma viral oncogene homolog 2, Bmpr2 - bone morphogenetic protein receptor, type ii (serine/threonine kinase), Cdh13 - cadherin 13, Slc8a1 - solute carrier family 8 (sodium/calcium exchanger), member 1, It…
GO:0006672	ceramide metabolic process	0.000107	0.00463	2.19	6963	31	1950	19	[Gla - galactosidase, alpha, Cers4 - ceramide synthase 4, B4galnt1 - beta-1,4-n-acetyl-galactosaminyl transferase 1, Cerk - ceramide kinase, Cln8 - ceroid-lipofuscinosis, neuronal 8 (epilepsy, progressive with mental retardation), Acer3 - alkaline ceramidase 3, Hexb - hexosaminidase b, Ugt8 - udp glycosyltransferase 8, Ormdl3 - orm1-like 3 (s. cerevisiae), Smpd1 - sphingomyelin phosphodiesterase …
GO:0009101	glycoprotein biosynthetic process	0.000107	0.00462	2.98	6963	12	1950	10	[Glce - glucuronic acid epimerase, Igf1 - insulin-like growth factor 1, Fkrp - fukutin related protein, Ndst1 - n-deacetylase/n-sulfotransferase (heparan glucosaminyl) 1, Hs6st1 - heparan sulfate 6-o-sulfotransferase 1, Xylt2 - xylosyltransferase ii, Chst8 - carbohydrate (n-acetylgalactosamine 4-0) sulfotransferase 8, Tnip1 - tnfaip3 interacting protein 1, B3gat3 - beta-1,3-glucuronyltransferase …
GO:0002027	regulation of heart rate	0.000113	0.00485	2.5	6963	20	1950	14	[Scn4b - sodium channel, voltage-gated, type iv, beta, Dmd - dystrophin, Cacna1g - calcium channel, voltage-dependent, t type, alpha 1g subunit, Cacna1e - calcium channel, voltage-dependent, r type, alpha 1e subunit, Slc8a1 - solute carrier family 8 (sodium/calcium exchanger), member 1, Scn2b - sodium channel, voltage-gated, type ii, beta, Scn1b - sodium channel, voltage-gated, type i, beta, Epas…
GO:0009582	detection of abiotic stimulus	0.000113	0.00482	2.5	6963	20	1950	14	[Serpine2 - serpin peptidase inhibitor, clade e, member 2, Plcb4 - phospholipase c, beta 4, Grm8 - glutamate receptor, metabotropic 8, Pkd1 - polycystic kidney disease 1 homolog (human), Pkd2 - polycystic kidney disease 2 homolog (human), Grin2b - glutamate receptor, ionotropic, n-methyl d-aspartate 2b, Atp2b2 - atpase, ca++ transporting, plasma membrane 2, Ephb1 - eph receptor b1, Fyn - fyn onco…
GO:0051592	response to calcium ion	0.000114	0.00482	1.89	6963	53	1950	28	[Adam9 - adam metallopeptidase domain 9, Slc6a1 - solute carrier family 6 (neurotransmitter transporter, gaba), member 1, Syt7 - synaptotagmin vii, Sdc1 - syndecan 1, Alg2 - asparagine-linked glycosylation 2, alpha-1,3-mannosyltransferase homolog (s. cerevisiae), Sparc - secreted protein, acidic, cysteine-rich (osteonectin), Grin1 - glutamate receptor, ionotropic, n-methyl d-aspartate 1, Kcnmb4 -…
GO:0010562	positive regulation of phosphorus metabolic process	0.000114	0.0048	1.4	6963	232	1950	91	[Nf1 - neurofibromin 1, Adam9 - adam metallopeptidase domain 9, Cdk5r2 - cyclin-dependent kinase 5, regulatory subunit 2 (p39), Akt2 - v-akt murine thymoma viral oncogene homolog 2, Bmpr2 - bone morphogenetic protein receptor, type ii (serine/threonine kinase), Ppap2b - phosphatidic acid phosphatase type 2b, Taok3 - tao kinase 3, Lrp8 - low density lipoprotein receptor-related protein 8, apolipop…
GO:0045937	positive regulation of phosphate metabolic process	0.000114	0.00478	1.4	6963	232	1950	91	[Nf1 - neurofibromin 1, Adam9 - adam metallopeptidase domain 9, Cdk5r2 - cyclin-dependent kinase 5, regulatory subunit 2 (p39), Akt2 - v-akt murine thymoma viral oncogene homolog 2, Bmpr2 - bone morphogenetic protein receptor, type ii (serine/threonine kinase), Ppap2b - phosphatidic acid phosphatase type 2b, Taok3 - tao kinase 3, Lrp8 - low density lipoprotein receptor-related protein 8, apolipop…
GO:0006821	chloride transport	0.000122	0.00511	2.58	6963	18	1950	13	[Clcn4 - chloride channel 4, Clcn3 - chloride channel 3, Clic4 - chloride intracellular channel 4, Clcn2 - chloride channel 2, Slc12a5 - solute carrier family 12 (potassium-chloride transporter), member 5, Glrb - glycine receptor, beta, Pcyox1 - prenylcysteine oxidase 1, Gabra1 - gamma-aminobutyric acid (gaba) a receptor, alpha 1, Clcc1 - chloride channel clic-like 1, Slc1a4 - solute carrier fami…
GO:0030148	sphingolipid biosynthetic process	0.000122	0.00508	2.58	6963	18	1950	13	[Cers4 - ceramide synthase 4, B4galnt1 - beta-1,4-n-acetyl-galactosaminyl transferase 1, Acer3 - alkaline ceramidase 3, Kdsr - 3-ketodihydrosphingosine reductase, Ugt8 - udp glycosyltransferase 8, B4galt6 - udp-gal:betaglcnac beta 1,4-galactosyltransferase, polypeptide 6, Smpd1 - sphingomyelin phosphodiesterase 1, acid lysosomal, Samd8 - sterile alpha motif domain containing 8, Cers1 - ceramide s…
GO:0050982	detection of mechanical stimulus	0.000123	0.00507	2.81	6963	14	1950	11	[Serpine2 - serpin peptidase inhibitor, clade e, member 2, Grm8 - glutamate receptor, metabotropic 8, Pkd1 - polycystic kidney disease 1 homolog (human), Pkd2 - polycystic kidney disease 2 homolog (human), Fyn - fyn oncogene related to src, fgr, yes, Kit - v-kit hardy-zuckerman 4 feline sarcoma viral oncogene homolog, Sox2 - sry (sex determining region y)-box 2, Slc12a2 - solute carrier family 12…
GO:0023057	negative regulation of signaling	0.000126	0.00518	1.37	6963	269	1950	103	[Nf1 - neurofibromin 1, Taok3 - tao kinase 3, Skor2-ps1 - ski family transcriptional corepressor 2, pseudogene 1, Fgfr3 - fibroblast growth factor receptor 3, Slc6a1 - solute carrier family 6 (neurotransmitter transporter, gaba), member 1, Magi2 - membrane associated guanylate kinase, ww and pdz domain containing 2, Ptprj - protein tyrosine phosphatase, receptor type, j, Grid2ip - glutamate recep…
GO:0006493	protein O-linked glycosylation	0.000126	0.00518	2.68	6963	16	1950	12	[Pomgnt1 - protein o-linked mannose beta1,2-n-acetylglucosaminyltransferase, Galnt2 - udp-n-acetyl-alpha-d-galactosamine:polypeptide n-acetylgalactosaminyltransferase 2 (galnac-t2), Trak2 - trafficking protein, kinesin binding 2, Gxylt1 - glucoside xylosyltransferase 1, Pofut2 - protein o-fucosyltransferase 2, Pomt1 - protein-o-mannosyltransferase 1, Pofut1 - protein o-fucosyltransferase 1, Galnt…
GO:0035637	multicellular organismal signaling	0.000126	0.00516	2.68	6963	16	1950	12	[Scn4b - sodium channel, voltage-gated, type iv, beta, Ank2 - ankyrin 2, neuronal, Cacna1a - calcium channel, voltage-dependent, p/q type, alpha 1a subunit, Kcnq2 - potassium voltage-gated channel, kqt-like subfamily, member 2, Cacna1e - calcium channel, voltage-dependent, r type, alpha 1e subunit, Pafah1b1 - platelet-activating factor acetylhydrolase, isoform 1b, subunit 1, Cacng2 - calcium chan…
GO:0022604	regulation of cell morphogenesis	0.000128	0.00519	1.47	6963	173	1950	71	[Aatk - apoptosis-associated tyrosine kinase, Mapt - microtubule-associated protein tau, Plxnb1 - plexin b1, Cfdp1 - craniofacial development protein 1, Lrp8 - low density lipoprotein receptor-related protein 8, apolipoprotein e receptor, Skor2-ps1 - ski family transcriptional corepressor 2, pseudogene 1, Fmnl1 - formin-like 1, Srcin1 - src kinase signaling inhibitor 1, Hexb - hexosaminidase b, E…
GO:0097105	presynaptic membrane assembly	0.000134	0.00543	3.57	6963	7	1950	7	[Il1rapl1 - interleukin 1 receptor accessory protein-like 1, Pten - phosphatase and tensin homolog, Ptprd - protein tyrosine phosphatase, receptor type, d, Nlgn2 - neuroligin 2, Nrxn1 - neurexin 1, Nlgn3 - neuroligin 3, Nlgn1 - neuroligin 1]
GO:0051932	synaptic transmission, GABAergic	0.000134	0.0054	3.57	6963	7	1950	7	[Grm4 - glutamate receptor, metabotropic 4, Gabra1 - gamma-aminobutyric acid (gaba) a receptor, alpha 1, Gabrb3 - gamma-aminobutyric acid (gaba) a receptor, beta 3, Gabrb2 - gamma-aminobutyric acid (gaba) a receptor, beta 2, Gabra6 - gamma-aminobutyric acid (gaba) a receptor, alpha 6, Grm1 - glutamate receptor, metabotropic 1, Gabrg2 - gamma-aminobutyric acid (gaba) a receptor, gamma 2]
GO:0050919	negative chemotaxis	0.000134	0.00538	3.57	6963	7	1950	7	[Plxna4a - plexin a4, a, Robo1 - roundabout homolog 1 (drosophila), Pdgfa - platelet-derived growth factor alpha polypeptide, Sema3a - sema domain, immunoglobulin domain (ig), short basic domain, secreted, (semaphorin) 3a, Epha7 - eph receptor a7, Ryk - receptor-like tyrosine kinase, Nrp2 - neuropilin 2]
GO:0060997	dendritic spine morphogenesis	0.000134	0.00535	3.57	6963	7	1950	7	[Epha5 - epha5, Pten - phosphatase and tensin homolog, Dlg4 - discs, large homolog 4 (drosophila), Ephb1 - eph receptor b1, Shank1 - sh3 and multiple ankyrin repeat domains 1, Shank3 - sh3 and multiple ankyrin repeat domains 3, Ephb2 - eph receptor b2]
GO:0050730	regulation of peptidyl-tyrosine phosphorylation	0.000137	0.00546	1.85	6963	56	1950	29	[Igf2 - insulin-like growth factor 2, Igf1 - insulin-like growth factor 1, Ppap2b - phosphatidic acid phosphatase type 2b, Lrp8 - low density lipoprotein receptor-related protein 8, apolipoprotein e receptor, Tnk2 - tyrosine kinase, non-receptor, 2, Arl2bp - adp-ribosylation factor-like 2 binding protein, Srcin1 - src kinase signaling inhibitor 1, Fgfr3 - fibroblast growth factor receptor 3, Epha…
GO:0010648	negative regulation of cell communication	0.000147	0.00581	1.36	6963	273	1950	104	[Nf1 - neurofibromin 1, Taok3 - tao kinase 3, Skor2-ps1 - ski family transcriptional corepressor 2, pseudogene 1, Fgfr3 - fibroblast growth factor receptor 3, Slc6a1 - solute carrier family 6 (neurotransmitter transporter, gaba), member 1, Magi2 - membrane associated guanylate kinase, ww and pdz domain containing 2, Ptprj - protein tyrosine phosphatase, receptor type, j, Grid2ip - glutamate recep…
GO:0001525	angiogenesis	0.000171	0.00676	1.76	6963	67	1950	33	[Cdh13 - cadherin 13, Itgav - integrin, alpha v, Plcd3 - phospholipase c, delta 3, S1pr1 - sphingosine-1-phosphate receptor 1, Adra2b - adrenergic, alpha-2b-, receptor, Ephb2 - eph receptor b2, Myh9 - myosin, heavy chain 9, non-muscle, Col18a1 - collagen, type xviii, alpha 1, Adam15 - a disintegrin and metallopeptidase domain 15 (metargidin), Hs6st1 - heparan sulfate 6-o-sulfotransferase 1, Tgfbr…
GO:0043270	positive regulation of ion transport	0.000189	0.00742	1.79	6963	62	1950	31	[Scn4b - sodium channel, voltage-gated, type iv, beta, Creb3 - camp responsive element binding protein 3, Akt2 - v-akt murine thymoma viral oncogene homolog 2, P2rx4 - purinergic receptor p2x, ligand-gated ion channel 4, Ahcyl1 - adenosylhomocysteinase-like 1, Adcyap1r1 - adenylate cyclase activating polypeptide 1 receptor 1, Slc6a1 - solute carrier family 6 (neurotransmitter transporter, gaba), …
GO:0007399	nervous system development	0.000191	0.00746	1.61	6963	100	1950	45	[Myt1l - myelin transcription factor 1-like, Igf1 - insulin-like growth factor 1, Mobp - myelin-associated oligodendrocyte basic protein, Snx27 - sorting nexin family member 27, Gal - galanin prepropeptide, Pcsk2 - proprotein convertase subtilisin/kexin type 2, Cln8 - ceroid-lipofuscinosis, neuronal 8 (epilepsy, progressive with mental retardation), Zfp423 - zinc finger protein 423, Slc1a2 - solu…
GO:0043410	positive regulation of MAPK cascade	0.000194	0.00754	1.73	6963	70	1950	34	[Hmgcr - 3-hydroxy-3-methylglutaryl-coa reductase, Igf2 - insulin-like growth factor 2, Igf1 - insulin-like growth factor 1, Taok3 - tao kinase 3, Itgav - integrin, alpha v, Fgfr3 - fibroblast growth factor receptor 3, C1qtnf1 - c1q and tumor necrosis factor related protein 1, Src - v-src sarcoma (schmidt-ruppin a-2) viral oncogene homolog (avian), Sema7a - semaphorin 7a, gpi membrane anchor, Ntr…
GO:0050770	regulation of axonogenesis	0.000194	0.00751	1.73	6963	70	1950	34	[Aatk - apoptosis-associated tyrosine kinase, Apoe - apolipoprotein e, Plxna4a - plexin a4, a, Mapt - microtubule-associated protein tau, Plxnb1 - plexin b1, Ephb2 - eph receptor b2, Sema7a - semaphorin 7a, gpi membrane anchor, Ntrk2 - neurotrophic tyrosine kinase, receptor, type 2, Chn1 - chimerin (chimaerin) 1, Robo1 - roundabout homolog 1 (drosophila), Amigo1 - adhesion molecule with ig like d…
GO:0030335	positive regulation of cell migration	0.000202	0.0078	1.59	6963	103	1950	46	[Igf1 - insulin-like growth factor 1, Adam9 - adam metallopeptidase domain 9, Adam10 - adam metallopeptidase domain 10, Creb3 - camp responsive element binding protein 3, Akt2 - v-akt murine thymoma viral oncogene homolog 2, Bmpr2 - bone morphogenetic protein receptor, type ii (serine/threonine kinase), Cdh13 - cadherin 13, Slc8a1 - solute carrier family 8 (sodium/calcium exchanger), member 1, It…
GO:0032844	regulation of homeostatic process	0.000205	0.00787	1.55	6963	120	1950	52	[Hmgcr - 3-hydroxy-3-methylglutaryl-coa reductase, Nf1 - neurofibromin 1, P2rx4 - purinergic receptor p2x, ligand-gated ion channel 4, Mcoln1 - mucolipin 1, Adcyap1r1 - adenylate cyclase activating polypeptide 1 receptor 1, Ero1l - ero1-like (s. cerevisiae), Epha5 - epha5, Ednrb - endothelin receptor type b, Neurod1 - neurogenic differentiation 1, Brsk2 - br serine/threonine kinase 2, Cnr1 - cann…
GO:0031346	positive regulation of cell projection organization	0.000224	0.00857	1.57	6963	109	1950	48	[Il1rapl1 - interleukin 1 receptor accessory protein-like 1, Apoe - apolipoprotein e, Dmd - dystrophin, Mapt - microtubule-associated protein tau, Sez6 - seizure related 6 homolog (mouse), Camk2b - calcium/calmodulin-dependent protein kinase ii beta, Plxnb1 - plexin b1, Lrp8 - low density lipoprotein receptor-related protein 8, apolipoprotein e receptor, Gprc5b - g protein-coupled receptor, famil…
GO:0051963	regulation of synapse assembly	0.000252	0.0096	2.38	6963	21	1950	14	[Chrnb2 - cholinergic receptor, nicotinic, beta 2 (neuronal), Pvrl1 - poliovirus receptor-related 1, Cbln1 - cerebellin 1 precursor, Nlgn1 - neuroligin 1, Ephb2 - eph receptor b2, Epha5 - epha5, Lrrc4b - leucine rich repeat containing 4b, Nlgn2 - neuroligin 2, Nrxn1 - neurexin 1, Nlgn3 - neuroligin 3, Grin1 - glutamate receptor, ionotropic, n-methyl d-aspartate 1, Ephb1 - eph receptor b1, Ptk2 - …
GO:0030166	proteoglycan biosynthetic process	0.000253	0.00961	3.17	6963	9	1950	8	[Glce - glucuronic acid epimerase, Igf1 - insulin-like growth factor 1, Ndst1 - n-deacetylase/n-sulfotransferase (heparan glucosaminyl) 1, Hs6st1 - heparan sulfate 6-o-sulfotransferase 1, Xylt2 - xylosyltransferase ii, Chst8 - carbohydrate (n-acetylgalactosamine 4-0) sulfotransferase 8, B3gat3 - beta-1,3-glucuronyltransferase 3 (glucuronosyltransferase i), Cant1 - calcium activated nucleotidase 1]
GO:0043090	amino acid import	0.000253	0.00956	3.17	6963	9	1950	8	[Slc17a7 - solute carrier family 17 (sodium-dependent inorganic phosphate cotransporter), member 7, Htt - huntingtin, Slc3a2 - solute carrier family 3 (activators of dibasic and neutral amino acid transport), member 2, Cln8 - ceroid-lipofuscinosis, neuronal 8 (epilepsy, progressive with mental retardation), Slc1a2 - solute carrier family 1 (glial high affinity glutamate transporter), member 2, Sl…
GO:0005975	carbohydrate metabolic process	0.000264	0.00993	1.36	6963	249	1950	95	[Pomgnt1 - protein o-linked mannose beta1,2-n-acetylglucosaminyltransferase, Slc23a2 - solute carrier family 23 (nucleobase transporters), member 2, B3gat1 - beta-1,3-glucuronyltransferase 1 (glucuronosyltransferase p), Fuca1 - fucosidase, alpha-l- 1, tissue, Acadm - acyl-coa dehydrogenase, c-4 to c-12 straight chain, B3gnt1 - udp-glcnac:betagal beta-1,3-n-acetylglucosaminyltransferase 1, Akt2 - …
GO:0010976	positive regulation of neuron projection development	0.000287	0.0108	1.9	6963	45	1950	24	[Fgfr1 - fibroblast growth factor receptor 1, Ntrk3 - neurotrophic tyrosine kinase, receptor, type 3, Dmd - dystrophin, Serpine2 - serpin peptidase inhibitor, clade e, member 2, Cntn1 - contactin 1, Camk2b - calcium/calmodulin-dependent protein kinase ii beta, Sez6 - seizure related 6 homolog (mouse), Itga3 - integrin, alpha 3, Lrp8 - low density lipoprotein receptor-related protein 8, apolipopro…
GO:0046879	hormone secretion	0.000288	0.0107	2.44	6963	19	1950	13	[Cplx1 - complexin 1, Rims2 - regulating synaptic membrane exocytosis 2, Lyn - v-yes-1 yamaguchi sarcoma viral related oncogene homolog, Fzd4 - frizzled family receptor 4, Cdk16 - cyclin-dependent kinase 16, Pclo - piccolo (presynaptic cytomatrix protein), Eif2ak3 - eukaryotic translation initiation factor 2 alpha kinase 3, Myo5a - myosin va, Neurod1 - neurogenic differentiation 1, Dgat1 - diacyl…
GO:0051272	positive regulation of cellular component movement	0.000291	0.0108	1.56	6963	110	1950	48	[Igf1 - insulin-like growth factor 1, Adam9 - adam metallopeptidase domain 9, Adam10 - adam metallopeptidase domain 10, Creb3 - camp responsive element binding protein 3, Akt2 - v-akt murine thymoma viral oncogene homolog 2, Bmpr2 - bone morphogenetic protein receptor, type ii (serine/threonine kinase), Cdh13 - cadherin 13, Slc8a1 - solute carrier family 8 (sodium/calcium exchanger), member 1, It…
GO:0018108	peptidyl-tyrosine phosphorylation	0.000292	0.0108	2.17	6963	28	1950	17	[Aatk - apoptosis-associated tyrosine kinase, Fgfr1 - fibroblast growth factor receptor 1, Abi2 - abl-interactor 2, Ddr1 - discoidin domain receptor tyrosine kinase 1, Erbb4 - v-erb-a erythroblastic leukemia viral oncogene homolog 4 (avian), Clk2 - cdc-like kinase 2, Jak1 - janus kinase 1, Lyn - v-yes-1 yamaguchi sarcoma viral related oncogene homolog, Fgfr3 - fibroblast growth factor receptor 3,…
GO:0050921	positive regulation of chemotaxis	0.000292	0.0108	2.17	6963	28	1950	17	[Il16 - interleukin 16, Calr - calreticulin, Creb3 - camp responsive element binding protein 3, Adam10 - adam metallopeptidase domain 10, Ntrk3 - neurotrophic tyrosine kinase, receptor, type 3, Akt2 - v-akt murine thymoma viral oncogene homolog 2, Dscam - down syndrome cell adhesion molecule, Cdh13 - cadherin 13, Gas6 - growth arrest specific 6, S1pr1 - sphingosine-1-phosphate receptor 1, Cx3cl1 …
GO:0030278	regulation of ossification	0.000302	0.0111	1.79	6963	58	1950	29	[Igf1 - insulin-like growth factor 1, Fam20c - family with sequence similarity 20, member c, Bmpr2 - bone morphogenetic protein receptor, type ii (serine/threonine kinase), Nell1 - nel-like 1 (chicken), Nbr1 - neighbor of brca1 gene 1, Ankh - ankylosis, progressive homolog (mouse), Twsg1 - twisted gastrulation homolog 1 (drosophila), Dd25 - hypothetical protein dd25, Ptk2 - ptk2 protein tyrosine …
GO:0051094	positive regulation of developmental process	0.000315	0.0115	1.33	6963	284	1950	106	[Hmgcr - 3-hydroxy-3-methylglutaryl-coa reductase, Bmpr2 - bone morphogenetic protein receptor, type ii (serine/threonine kinase), Hopx - hop homeobox, Thra - thyroid hormone receptor alpha, Plxnb1 - plexin b1, Fgfr3 - fibroblast growth factor receptor 3, Cbln1 - cerebellin 1 precursor, Nptn - neuroplastin, Adra2b - adrenergic, alpha-2b-, receptor, Ephb2 - eph receptor b2, Maged1 - melanoma antig…
GO:0006487	protein N-linked glycosylation	0.00032	0.0116	2.52	6963	17	1950	12	[Ddost - dolichyl-diphosphooligosaccharide-protein glycosyltransferase, Tusc3 - tumor suppressor candidate 3, Syvn1 - synovial apoptosis inhibitor 1, synoviolin, Rpn2 - ribophorin ii, Mgat5 - mannosyl (alpha-1,6-)-glycoprotein beta-1,6-n-acetyl-glucosaminyltransferase, Entpd5 - ectonucleoside triphosphate diphosphohydrolase 5, Stt3a - stt3, subunit of the oligosaccharyltransferase complex, homolo…
GO:0045838	positive regulation of membrane potential	0.00032	0.0116	2.52	6963	17	1950	12	[Pten - phosphatase and tensin homolog, Nlgn2 - neuroligin 2, Nrxn1 - neurexin 1, Nlgn3 - neuroligin 3, Dlg4 - discs, large homolog 4 (drosophila), Grin1 - glutamate receptor, ionotropic, n-methyl d-aspartate 1, Shank1 - sh3 and multiple ankyrin repeat domains 1, Grin2a - glutamate receptor, ionotropic, n-methyl d-aspartate 2a, Reln - reelin, Shank3 - sh3 and multiple ankyrin repeat domains 3, Gr…
GO:0051893	regulation of focal adhesion assembly	0.000323	0.0116	2.92	6963	11	1950	9	[Src - v-src sarcoma (schmidt-ruppin a-2) viral oncogene homolog (avian), Pten - phosphatase and tensin homolog, Mmp14 - matrix metallopeptidase 14 (membrane-inserted), Macf1 - microtubule-actin crosslinking factor 1, Gpm6b - glycoprotein m6b, Sdc4 - syndecan 4, Tsc1 - tuberous sclerosis 1, Vegfa - vascular endothelial growth factor a, Ptprj - protein tyrosine phosphatase, receptor type, j]
GO:0006029	proteoglycan metabolic process	0.000323	0.0116	2.92	6963	11	1950	9	[Glce - glucuronic acid epimerase, Igf1 - insulin-like growth factor 1, Ndst1 - n-deacetylase/n-sulfotransferase (heparan glucosaminyl) 1, Hs6st1 - heparan sulfate 6-o-sulfotransferase 1, Xylt2 - xylosyltransferase ii, Chst8 - carbohydrate (n-acetylgalactosamine 4-0) sulfotransferase 8, B3gat3 - beta-1,3-glucuronyltransferase 3 (glucuronosyltransferase i), Ppard - peroxisome proliferator-activate…
GO:0015813	L-glutamate transport	0.000323	0.0116	2.92	6963	11	1950	9	[Slc1a6 - solute carrier family 1 (high affinity aspartate/glutamate transporter), member 6, Arl6ip5 - adp-ribosylation-like factor 6 interacting protein 5, Slc17a7 - solute carrier family 17 (sodium-dependent inorganic phosphate cotransporter), member 7, Psen1 - presenilin 1, Htt - huntingtin, Cln8 - ceroid-lipofuscinosis, neuronal 8 (epilepsy, progressive with mental retardation), Slc1a2 - solu…
GO:0045761	regulation of adenylate cyclase activity	0.000323	0.0115	2.92	6963	11	1950	9	[Timp2 - timp metallopeptidase inhibitor 2, Nf1 - neurofibromin 1, Hrh3 - histamine receptor h3, Vipr2 - vasoactive intestinal peptide receptor 2, Palm - paralemmin, Calm3 - calmodulin 3, Calm1 - calmodulin 1, Gnal - guanine nucleotide binding protein, alpha stimulating, olfactory type, Gabbr1 - gamma-aminobutyric acid (gaba) b receptor 1]
GO:0050974	detection of mechanical stimulus involved in sensory perception	0.000323	0.0115	2.92	6963	11	1950	9	[Serpine2 - serpin peptidase inhibitor, clade e, member 2, Grm8 - glutamate receptor, metabotropic 8, Fyn - fyn oncogene related to src, fgr, yes, Kit - v-kit hardy-zuckerman 4 feline sarcoma viral oncogene homolog, Grin2b - glutamate receptor, ionotropic, n-methyl d-aspartate 2b, Sox2 - sry (sex determining region y)-box 2, Slc12a2 - solute carrier family 12 (sodium/potassium/chloride transporte…
GO:0090109	regulation of cell-substrate junction assembly	0.000323	0.0114	2.92	6963	11	1950	9	[Pten - phosphatase and tensin homolog, Src - v-src sarcoma (schmidt-ruppin a-2) viral oncogene homolog (avian), Mmp14 - matrix metallopeptidase 14 (membrane-inserted), Gpm6b - glycoprotein m6b, Macf1 - microtubule-actin crosslinking factor 1, Sdc4 - syndecan 4, Tsc1 - tuberous sclerosis 1, Ptprj - protein tyrosine phosphatase, receptor type, j, Vegfa - vascular endothelial growth factor a]
GO:0044255	cellular lipid metabolic process	0.000325	0.0114	1.34	6963	278	1950	104	[Hmgcr - 3-hydroxy-3-methylglutaryl-coa reductase, Cdipt - cdp-diacylglycerol--inositol 3-phosphatidyltransferase, Acadm - acyl-coa dehydrogenase, c-4 to c-12 straight chain, Ppap2b - phosphatidic acid phosphatase type 2b, Acsl4 - acyl-coa synthetase long-chain family member 4, Apoa5 - apolipoprotein a-v, Acsl3 - acyl-coa synthetase long-chain family member 3, Ppard - peroxisome proliferator-acti…
GO:1901888	regulation of cell junction assembly	0.000343	0.012	2.62	6963	15	1950	11	[Pten - phosphatase and tensin homolog, Src - v-src sarcoma (schmidt-ruppin a-2) viral oncogene homolog (avian), Mmp14 - matrix metallopeptidase 14 (membrane-inserted), Macf1 - microtubule-actin crosslinking factor 1, Gpm6b - glycoprotein m6b, Sdc4 - syndecan 4, Prkaca - protein kinase, camp-dependent, catalytic, alpha, Tsc1 - tuberous sclerosis 1, Gja1 - gap junction protein, alpha 1, Vegfa - va…
GO:0051924	regulation of calcium ion transport	0.000346	0.0121	1.76	6963	61	1950	30	[Igf1 - insulin-like growth factor 1, Creb3 - camp responsive element binding protein 3, P2rx4 - purinergic receptor p2x, ligand-gated ion channel 4, Cacna1g - calcium channel, voltage-dependent, t type, alpha 1g subunit, Slc8a1 - solute carrier family 8 (sodium/calcium exchanger), member 1, Adcyap1r1 - adenylate cyclase activating polypeptide 1 receptor 1, Gnao1 - guanine nucleotide binding prot…
GO:0030073	insulin secretion	0.000348	0.0121	2.75	6963	13	1950	10	[Pclo - piccolo (presynaptic cytomatrix protein), Eif2ak3 - eukaryotic translation initiation factor 2 alpha kinase 3, Myo5a - myosin va, Neurod1 - neurogenic differentiation 1, Cplx1 - complexin 1, Dgat1 - diacylglycerol o-acyltransferase 1, Rims2 - regulating synaptic membrane exocytosis 2, Cacna1c - calcium channel, voltage-dependent, l type, alpha 1c subunit, Htt - huntingtin, Rapgef4 - rap g…
GO:0015800	acidic amino acid transport	0.000348	0.0121	2.75	6963	13	1950	10	[Slc1a6 - solute carrier family 1 (high affinity aspartate/glutamate transporter), member 6, Arl6ip5 - adp-ribosylation-like factor 6 interacting protein 5, Psen1 - presenilin 1, Slc17a7 - solute carrier family 17 (sodium-dependent inorganic phosphate cotransporter), member 7, Htt - huntingtin, Cln8 - ceroid-lipofuscinosis, neuronal 8 (epilepsy, progressive with mental retardation), Slc1a2 - solu…
GO:0031279	regulation of cyclase activity	0.000348	0.012	2.75	6963	13	1950	10	[Timp2 - timp metallopeptidase inhibitor 2, Rap2ip - rap2 interacting protein, Nf1 - neurofibromin 1, Hrh3 - histamine receptor h3, Vipr2 - vasoactive intestinal peptide receptor 2, Palm - paralemmin, Calm3 - calmodulin 3, Calm1 - calmodulin 1, Gnal - guanine nucleotide binding protein, alpha stimulating, olfactory type, Gabbr1 - gamma-aminobutyric acid (gaba) b receptor 1]
GO:0030534	adult behavior	0.00039	0.0134	1.73	6963	64	1950	31	[Mapt - microtubule-associated protein tau, Abat - 4-aminobutyrate aminotransferase, Cln8 - ceroid-lipofuscinosis, neuronal 8 (epilepsy, progressive with mental retardation), Slc1a2 - solute carrier family 1 (glial high affinity glutamate transporter), member 2, Glrb - glycine receptor, beta, Ppt1 - palmitoyl-protein thioesterase 1, Grin1 - glutamate receptor, ionotropic, n-methyl d-aspartate 1, …
GO:0008150	biological_process	0.000401	0.0138	1.03	6963	5792	1950	1669	[A2m - alpha-2-macroglobulin, Creb3 - camp responsive element binding protein 3, Acadm - acyl-coa dehydrogenase, c-4 to c-12 straight chain, Zhx1 - zinc fingers and homeoboxes 1, Acp2 - acid phosphatase 2, lysosomal, Hopx - hop homeobox, Slc6a13 - solute carrier family 6 (neurotransmitter transporter, gaba), member 13, Adcyap1r1 - adenylate cyclase activating polypeptide 1 receptor 1, Tmem56 - tr…
GO:0010769	regulation of cell morphogenesis involved in differentiation	0.000402	0.0137	1.53	6963	117	1950	50	[Aatk - apoptosis-associated tyrosine kinase, Mapt - microtubule-associated protein tau, Plxnb1 - plexin b1, Lrp8 - low density lipoprotein receptor-related protein 8, apolipoprotein e receptor, Skor2-ps1 - ski family transcriptional corepressor 2, pseudogene 1, Srcin1 - src kinase signaling inhibitor 1, Ephb2 - eph receptor b2, Ntrk2 - neurotrophic tyrosine kinase, receptor, type 2, Sema7a - sem…
GO:0048520	positive regulation of behavior	0.000422	0.0143	2.07	6963	31	1950	18	[Il16 - interleukin 16, Calr - calreticulin, Adam10 - adam metallopeptidase domain 10, Creb3 - camp responsive element binding protein 3, Ntrk3 - neurotrophic tyrosine kinase, receptor, type 3, Akt2 - v-akt murine thymoma viral oncogene homolog 2, Dscam - down syndrome cell adhesion molecule, Cdh13 - cadherin 13, Gas6 - growth arrest specific 6, S1pr1 - sphingosine-1-phosphate receptor 1, Cx3cl1 …
GO:0051970	negative regulation of transmission of nerve impulse	0.00043	0.0146	2.23	6963	24	1950	15	[Grm4 - glutamate receptor, metabotropic 4, Gnai2 - guanine nucleotide binding protein (g protein), alpha inhibiting activity polypeptide 2, Abhd6 - abhydrolase domain containing 6, Slc6a1 - solute carrier family 6 (neurotransmitter transporter, gaba), member 1, Grik1 - glutamate receptor, ionotropic, kainate 1, Pten - phosphatase and tensin homolog, Slc24a2 - solute carrier family 24 (sodium/pot…
GO:0050805	negative regulation of synaptic transmission	0.00043	0.0145	2.23	6963	24	1950	15	[Grm4 - glutamate receptor, metabotropic 4, Gnai2 - guanine nucleotide binding protein (g protein), alpha inhibiting activity polypeptide 2, Abhd6 - abhydrolase domain containing 6, Slc6a1 - solute carrier family 6 (neurotransmitter transporter, gaba), member 1, Grik1 - glutamate receptor, ionotropic, kainate 1, Pten - phosphatase and tensin homolog, Slc24a2 - solute carrier family 24 (sodium/pot…
GO:0006643	membrane lipid metabolic process	0.000438	0.0147	1.76	6963	59	1950	29	[Psap - prosaposin, Ugcg - udp-glucose ceramide glucosyltransferase, Cerk - ceramide kinase, Cln8 - ceroid-lipofuscinosis, neuronal 8 (epilepsy, progressive with mental retardation), Hexb - hexosaminidase b, Kdsr - 3-ketodihydrosphingosine reductase, Aldh5a1 - aldehyde dehydrogenase 5 family, member a1, Cers1 - ceramide synthase 1, Cers5 - ceramide synthase 5, Sgms1 - sphingomyelin synthase 1, Sm…
GO:0016339	calcium-dependent cell-cell adhesion	0.00048	0.0161	3.57	6963	6	1950	6	[Cdh2 - cadherin 2, Cdh22 - cadherin 22, Nrxn1 - neurexin 1, Cdh13 - cadherin 13, Atp2c1 - atpase, ca++ transporting, type 2c, member 1, Nlgn1 - neuroligin 1]
GO:0045595	regulation of cell differentiation	0.000513	0.0171	1.24	6963	465	1950	162	[Nf1 - neurofibromin 1, Adam10 - adam metallopeptidase domain 10, Bmpr2 - bone morphogenetic protein receptor, type ii (serine/threonine kinase), Grid2 - glutamate receptor, ionotropic, delta 2, Hopx - hop homeobox, Thra - thyroid hormone receptor alpha, Plxnb1 - plexin b1, Ywhag - tyrosine 3-monooxygenase/tryptophan 5-monooxygenase activation protein, gamma polypeptide, Skor2-ps1 - ski family tr…
GO:0018212	peptidyl-tyrosine modification	0.000523	0.0174	2.09	6963	29	1950	17	[Aatk - apoptosis-associated tyrosine kinase, Fgfr1 - fibroblast growth factor receptor 1, Abi2 - abl-interactor 2, Ddr1 - discoidin domain receptor tyrosine kinase 1, Erbb4 - v-erb-a erythroblastic leukemia viral oncogene homolog 4 (avian), Clk2 - cdc-like kinase 2, Jak1 - janus kinase 1, Lyn - v-yes-1 yamaguchi sarcoma viral related oncogene homolog, Fgfr3 - fibroblast growth factor receptor 3,…
GO:0048585	negative regulation of response to stimulus	0.000531	0.0176	1.31	6963	300	1950	110	[Hmgcr - 3-hydroxy-3-methylglutaryl-coa reductase, A2m - alpha-2-macroglobulin, Nf1 - neurofibromin 1, Grid2 - glutamate receptor, ionotropic, delta 2, Taok3 - tao kinase 3, Skor2-ps1 - ski family transcriptional corepressor 2, pseudogene 1, Fgfr3 - fibroblast growth factor receptor 3, Magi2 - membrane associated guanylate kinase, ww and pdz domain containing 2, Ptprj - protein tyrosine phosphata…
GO:0015833	peptide transport	0.000611	0.0202	2.32	6963	20	1950	13	[Cplx1 - complexin 1, Tap2 - transporter 2, atp-binding cassette, sub-family b (mdr/tap), Rims2 - regulating synaptic membrane exocytosis 2, Abcc1 - atp-binding cassette, subfamily c (cftr/mrp), member 1, Cdk16 - cyclin-dependent kinase 16, Pclo - piccolo (presynaptic cytomatrix protein), Eif2ak3 - eukaryotic translation initiation factor 2 alpha kinase 3, Myo5a - myosin va, Neurod1 - neurogenic …
GO:0009914	hormone transport	0.000611	0.0201	2.32	6963	20	1950	13	[Cplx1 - complexin 1, Rims2 - regulating synaptic membrane exocytosis 2, Lyn - v-yes-1 yamaguchi sarcoma viral related oncogene homolog, Fzd4 - frizzled family receptor 4, Cdk16 - cyclin-dependent kinase 16, Pclo - piccolo (presynaptic cytomatrix protein), Eif2ak3 - eukaryotic translation initiation factor 2 alpha kinase 3, Myo5a - myosin va, Neurod1 - neurogenic differentiation 1, Dgat1 - diacyl…
GO:0006508	proteolysis	0.000636	0.0209	1.3	6963	317	1950	115	[Ctsb - cathepsin b, Ncstn - nicastrin, Adam10 - adam metallopeptidase domain 10, Mme - membrane metallo-endopeptidase, Lnx1 - ligand of numb-protein x 1, Cpe - carboxypeptidase e, Cul4b - cullin 4b, Wwp2 - ww domain containing e3 ubiquitin protein ligase 2, Usp30 - ubiquitin specific peptidase 30, Plat - plasminogen activator, tissue, Psma4 - proteasome (prosome, macropain) subunit, alpha type 4…
GO:0051952	regulation of amine transport	0.000647	0.0211	2.12	6963	27	1950	16	[Adrbk1 - adrenergic, beta, receptor kinase 1, Chrnb2 - cholinergic receptor, nicotinic, beta 2 (neuronal), Hrh3 - histamine receptor h3, Nat8l - n-acetyltransferase 8-like, Rtn4 - reticulon 4, Gpm6b - glycoprotein m6b, Grin2b - glutamate receptor, ionotropic, n-methyl d-aspartate 2b, Slc6a1 - solute carrier family 6 (neurotransmitter transporter, gaba), member 1, Grm1 - glutamate receptor, metab…
GO:0030814	regulation of cAMP metabolic process	0.000647	0.021	2.12	6963	27	1950	16	[Timp2 - timp metallopeptidase inhibitor 2, Nf1 - neurofibromin 1, Akap12 - a kinase (prka) anchor protein 12, Hrh3 - histamine receptor h3, Grm8 - glutamate receptor, metabotropic 8, Pkd2 - polycystic kidney disease 2 homolog (human), Chga - chromogranin a (parathyroid secretory protein 1), Adcyap1r1 - adenylate cyclase activating polypeptide 1 receptor 1, Palm - paralemmin, Aplp1 - amyloid beta…
GO:0051588	regulation of neurotransmitter transport	0.000647	0.021	2.12	6963	27	1950	16	[Nf1 - neurofibromin 1, Nat8l - n-acetyltransferase 8-like, Unc13c - unc-13 homolog c (c. elegans), Grm8 - glutamate receptor, metabotropic 8, Rims2 - regulating synaptic membrane exocytosis 2, Gpm6b - glycoprotein m6b, Kcnc3 - potassium voltage gated channel, shaw-related subfamily, member 3, Nlgn1 - neuroligin 1, Rims1 - regulating synaptic membrane exocytosis 1, Ntrk2 - neurotrophic tyrosine k…
GO:0031645	negative regulation of neurological system process	0.000647	0.0209	2.12	6963	27	1950	16	[Gnai2 - guanine nucleotide binding protein (g protein), alpha inhibiting activity polypeptide 2, Grm4 - glutamate receptor, metabotropic 4, Abhd6 - abhydrolase domain containing 6, Slc6a1 - solute carrier family 6 (neurotransmitter transporter, gaba), member 1, Pten - phosphatase and tensin homolog, Grik1 - glutamate receptor, ionotropic, kainate 1, Eif2ak3 - eukaryotic translation initiation fa…
GO:0046890	regulation of lipid biosynthetic process	0.000667	0.0215	1.82	6963	47	1950	24	[Igf2 - insulin-like growth factor 2, Apoe - apolipoprotein e, Igf1 - insulin-like growth factor 1, Pdgfa - platelet-derived growth factor alpha polypeptide, Lpcat1 - lysophosphatidylcholine acyltransferase 1, Slc27a1 - solute carrier family 27 (fatty acid transporter), member 1, Ctdnep1 - ctd nuclear envelope phosphatase 1, Por - p450 (cytochrome) oxidoreductase, Atp1a1 - atpase, na+/k+ transpor…
GO:0030198	extracellular matrix organization	0.000709	0.0227	1.87	6963	42	1950	22	[Nf1 - neurofibromin 1, Col5a1 - collagen, type v, alpha 1, Gpm6b - glycoprotein m6b, Gas6 - growth arrest specific 6, Lamc1 - laminin, gamma 1, Aplp1 - amyloid beta (a4) precursor-like protein 1, App - amyloid beta (a4) precursor protein, Hsd17b12 - hydroxysteroid (17-beta) dehydrogenase 12, Col18a1 - collagen, type xviii, alpha 1, Crispld2 - cysteine-rich secretory protein lccl domain containin…
GO:0045667	regulation of osteoblast differentiation	0.000709	0.0227	1.87	6963	42	1950	22	[Apc - adenomatous polyposis coli, Fgfr1 - fibroblast growth factor receptor 1, Fam20c - family with sequence similarity 20, member c, Igf1 - insulin-like growth factor 1, Esrra - estrogen related receptor, alpha, Bmpr1a - bone morphogenetic protein receptor, type ia, Bmpr2 - bone morphogenetic protein receptor, type ii (serine/threonine kinase), Sema4d - sema domain, immunoglobulin domain (ig), …
GO:0072657	protein localization to membrane	0.000709	0.0226	1.87	6963	42	1950	22	[Gpr158 - g protein-coupled receptor 158, Akt2 - v-akt murine thymoma viral oncogene homolog 2, Lrp4 - low density lipoprotein receptor-related protein 4, Zfyve27 - zinc finger, fyve domain containing 27, Dlg2 - discs, large homolog 2 (drosophila), Cpe - carboxypeptidase e, Grin2b - glutamate receptor, ionotropic, n-methyl d-aspartate 2b, Magi2 - membrane associated guanylate kinase, ww and pdz d…
GO:0030799	regulation of cyclic nucleotide metabolic process	0.000713	0.0226	2.01	6963	32	1950	18	[Rap2ip - rap2 interacting protein, Timp2 - timp metallopeptidase inhibitor 2, Apoe - apolipoprotein e, Nf1 - neurofibromin 1, Akap12 - a kinase (prka) anchor protein 12, Hrh3 - histamine receptor h3, Grm8 - glutamate receptor, metabotropic 8, Pkd2 - polycystic kidney disease 2 homolog (human), Chga - chromogranin a (parathyroid secretory protein 1), Adcyap1r1 - adenylate cyclase activating polyp…
GO:0006942	regulation of striated muscle contraction	0.000715	0.0226	2.38	6963	18	1950	12	[Adrbk1 - adrenergic, beta, receptor kinase 1, Ank2 - ankyrin 2, neuronal, P2rx4 - purinergic receptor p2x, ligand-gated ion channel 4, Slc8a1 - solute carrier family 8 (sodium/calcium exchanger), member 1, Casq2 - calsequestrin 2 (cardiac muscle), Ryr2 - ryanodine receptor 2, cardiac, Atp1a1 - atpase, na+/k+ transporting, alpha 1 polypeptide, Atp1a2 - atpase, na+/k+ transporting, alpha 2 polypep…
GO:0042472	inner ear morphogenesis	0.000715	0.0225	2.38	6963	18	1950	12	[Bcr - breakpoint cluster region, Fgfr1 - fibroblast growth factor receptor 1, Abr - active bcr-related gene, Insig1 - insulin induced gene 1, Myo6 - myosin vi, Sox2 - sry (sex determining region y)-box 2, Ntn1 - netrin 1, Chd7 - chromodomain helicase dna binding protein 7, Sobp - sine oculis-binding protein homolog (drosophila), Atp2b2 - atpase, ca++ transporting, plasma membrane 2, Insig2 - ins…
GO:0035249	synaptic transmission, glutamatergic	0.000715	0.0224	2.38	6963	18	1950	12	[Grik1 - glutamate receptor, ionotropic, kainate 1, Plat - plasminogen activator, tissue, Cdh8 - cadherin 8, Grm4 - glutamate receptor, metabotropic 4, Cacna1a - calcium channel, voltage-dependent, p/q type, alpha 1a subunit, Grid2 - glutamate receptor, ionotropic, delta 2, Grm8 - glutamate receptor, metabotropic 8, Slc17a7 - solute carrier family 17 (sodium-dependent inorganic phosphate cotransp…
GO:0007528	neuromuscular junction development	0.000715	0.0224	2.38	6963	18	1950	12	[Col4a1 - collagen, type iv, alpha 1, Ntrk2 - neurotrophic tyrosine kinase, receptor, type 2, Cacna2d2 - calcium channel, voltage-dependent, alpha 2/delta subunit 2, Nedd4 - neural precursor cell expressed, developmentally down-regulated 4, Lrp4 - low density lipoprotein receptor-related protein 4, Dnaja3 - dnaj (hsp40) homolog, subfamily a, member 3, Afg3l2 - afg3 atpase family gene 3-like 2 (s.…
GO:0030182	neuron differentiation	0.000737	0.023	1.52	6963	108	1950	46	[Il1rapl1 - interleukin 1 receptor accessory protein-like 1, Mapt - microtubule-associated protein tau, Chrdl1 - kohjirin, Skor2-ps1 - ski family transcriptional corepressor 2, pseudogene 1, S1pr1 - sphingosine-1-phosphate receptor 1, Cln8 - ceroid-lipofuscinosis, neuronal 8 (epilepsy, progressive with mental retardation), Herc1 - hect (homologous to the e6-ap (ube3a) carboxyl terminus) domain an…
GO:0043408	regulation of MAPK cascade	0.000739	0.023	1.39	6963	188	1950	73	[Hmgcr - 3-hydroxy-3-methylglutaryl-coa reductase, Nf1 - neurofibromin 1, Psap - prosaposin, Adam9 - adam metallopeptidase domain 9, Akt2 - v-akt murine thymoma viral oncogene homolog 2, Atp6ap2 - atpase, h+ transporting, lysosomal accessory protein 2, Taok3 - tao kinase 3, Fgfr3 - fibroblast growth factor receptor 3, Epha7 - eph receptor a7, C1qtnf1 - c1q and tumor necrosis factor related protei…
GO:0030154	cell differentiation	0.000768	0.0238	1.22	6963	514	1950	176	[Hmgcr - 3-hydroxy-3-methylglutaryl-coa reductase, Myt1l - myelin transcription factor 1-like, A2m - alpha-2-macroglobulin, Nf1 - neurofibromin 1, Acadm - acyl-coa dehydrogenase, c-4 to c-12 straight chain, Bmpr2 - bone morphogenetic protein receptor, type ii (serine/threonine kinase), Hopx - hop homeobox, Thra - thyroid hormone receptor alpha, Nr2f2 - nuclear receptor subfamily 2, group f, membe…
GO:0048169	regulation of long-term neuronal synaptic plasticity	0.000797	0.0246	2.14	6963	25	1950	15	[Nf1 - neurofibromin 1, Syp - synaptophysin, Camk2b - calcium/calmodulin-dependent protein kinase ii beta, Grin2b - glutamate receptor, ionotropic, n-methyl d-aspartate 2b, Grin2a - glutamate receptor, ionotropic, n-methyl d-aspartate 2a, Nptn - neuroplastin, Rab8a - rab8a, member ras oncogene family, Ephb2 - eph receptor b2, Rims1 - regulating synaptic membrane exocytosis 1, Dlg4 - discs, large …
GO:0006022	aminoglycan metabolic process	0.000797	0.0245	2.14	6963	25	1950	15	[Glce - glucuronic acid epimerase, Igf1 - insulin-like growth factor 1, Hs2st1 - heparan sulfate 2-o-sulfotransferase 1, B3gnt1 - udp-glcnac:betagal beta-1,3-n-acetylglucosaminyltransferase 1, Xylt2 - xylosyltransferase ii, Chid1 - chitinase domain containing 1, Hexb - hexosaminidase b, Gns - glucosamine (n-acetyl)-6-sulfatase, Ndst1 - n-deacetylase/n-sulfotransferase (heparan glucosaminyl) 1, Ch…
GO:0040008	regulation of growth	0.000803	0.0246	1.35	6963	219	1950	83	[Aatk - apoptosis-associated tyrosine kinase, Mapt - microtubule-associated protein tau, Creb3 - camp responsive element binding protein 3, Ddr1 - discoidin domain receptor tyrosine kinase 1, Adam10 - adam metallopeptidase domain 10, Bmpr2 - bone morphogenetic protein receptor, type ii (serine/threonine kinase), Hopx - hop homeobox, Agpat6 - 1-acylglycerol-3-phosphate o-acyltransferase 6 (lysopho…
GO:0071825	protein-lipid complex subunit organization	0.00081	0.0247	3.12	6963	8	1950	7	[Apoe - apolipoprotein e, Pla2g7 - phospholipase a2, group vii (platelet-activating factor acetylhydrolase, plasma), Dgat1 - diacylglycerol o-acyltransferase 1, Abca5 - atp-binding cassette, subfamily a (abc1), member 5, Acsl3 - acyl-coa synthetase long-chain family member 3, Abcg1 - atp-binding cassette, subfamily g (white), member 1, Apoa5 - apolipoprotein a-v]
GO:0071827	plasma lipoprotein particle organization	0.00081	0.0247	3.12	6963	8	1950	7	[Apoe - apolipoprotein e, Pla2g7 - phospholipase a2, group vii (platelet-activating factor acetylhydrolase, plasma), Dgat1 - diacylglycerol o-acyltransferase 1, Abca5 - atp-binding cassette, subfamily a (abc1), member 5, Acsl3 - acyl-coa synthetase long-chain family member 3, Abcg1 - atp-binding cassette, subfamily g (white), member 1, Apoa5 - apolipoprotein a-v]
GO:0097090	presynaptic membrane organization	0.00081	0.0246	3.12	6963	8	1950	7	[Il1rapl1 - interleukin 1 receptor accessory protein-like 1, Pten - phosphatase and tensin homolog, Ptprd - protein tyrosine phosphatase, receptor type, d, Nlgn2 - neuroligin 2, Nlgn3 - neuroligin 3, Nrxn1 - neurexin 1, Nlgn1 - neuroligin 1]
GO:0042531	positive regulation of tyrosine phosphorylation of STAT protein	0.00081	0.0245	3.12	6963	8	1950	7	[Igf1 - insulin-like growth factor 1, Il6st - interleukin 6 signal transducer, Erbb4 - v-erb-a erythroblastic leukemia viral oncogene homolog 4 (avian), Kit - v-kit hardy-zuckerman 4 feline sarcoma viral oncogene homolog, Arl2bp - adp-ribosylation factor-like 2 binding protein, Lyn - v-yes-1 yamaguchi sarcoma viral related oncogene homolog, Fgfr3 - fibroblast growth factor receptor 3]
GO:0007158	neuron cell-cell adhesion	0.00081	0.0244	3.12	6963	8	1950	7	[Astn1 - astrotactin 1, Ret - ret proto-oncogene, Nlgn2 - neuroligin 2, Nrxn1 - neurexin 1, Nlgn3 - neuroligin 3, Tnr - tenascin r (restrictin, janusin), Nlgn1 - neuroligin 1]
GO:0002790	peptide secretion	0.000819	0.0246	2.45	6963	16	1950	11	[Pclo - piccolo (presynaptic cytomatrix protein), Cdk16 - cyclin-dependent kinase 16, Eif2ak3 - eukaryotic translation initiation factor 2 alpha kinase 3, Myo5a - myosin va, Neurod1 - neurogenic differentiation 1, Cplx1 - complexin 1, Dgat1 - diacylglycerol o-acyltransferase 1, Rims2 - regulating synaptic membrane exocytosis 2, Cacna1c - calcium channel, voltage-dependent, l type, alpha 1c subuni…
GO:0030072	peptide hormone secretion	0.000819	0.0245	2.45	6963	16	1950	11	[Pclo - piccolo (presynaptic cytomatrix protein), Cdk16 - cyclin-dependent kinase 16, Eif2ak3 - eukaryotic translation initiation factor 2 alpha kinase 3, Myo5a - myosin va, Neurod1 - neurogenic differentiation 1, Cplx1 - complexin 1, Dgat1 - diacylglycerol o-acyltransferase 1, Rims2 - regulating synaptic membrane exocytosis 2, Cacna1c - calcium channel, voltage-dependent, l type, alpha 1c subuni…
GO:0050906	detection of stimulus involved in sensory perception	0.000819	0.0244	2.45	6963	16	1950	11	[Serpine2 - serpin peptidase inhibitor, clade e, member 2, Grm8 - glutamate receptor, metabotropic 8, Ephb1 - eph receptor b1, Fyn - fyn oncogene related to src, fgr, yes, Kit - v-kit hardy-zuckerman 4 feline sarcoma viral oncogene homolog, Sox2 - sry (sex determining region y)-box 2, Slc12a2 - solute carrier family 12 (sodium/potassium/chloride transporters), member 2, Grin2b - glutamate recepto…
GO:0060291	long-term synaptic potentiation	0.000819	0.0244	2.45	6963	16	1950	11	[Rims1 - regulating synaptic membrane exocytosis 1, Pten - phosphatase and tensin homolog, Ntrk2 - neurotrophic tyrosine kinase, receptor, type 2, Slc24a2 - solute carrier family 24 (sodium/potassium/calcium exchanger), member 2, Serpine2 - serpin peptidase inhibitor, clade e, member 2, Camk2b - calcium/calmodulin-dependent protein kinase ii beta, Gfap - glial fibrillary acidic protein, Tnr - ten…
GO:0060401	cytosolic calcium ion transport	0.000819	0.0243	2.45	6963	16	1950	11	[Slc8a2 - solute carrier family 8 (sodium/calcium exchanger), member 2, Slc8a3 - solute carrier family 8 (sodium/calcium exchanger), member 3, Cacna1g - calcium channel, voltage-dependent, t type, alpha 1g subunit, Ryr1l - ryanodine receptor 1-like, Pkd2 - polycystic kidney disease 2 homolog (human), Slc8a1 - solute carrier family 8 (sodium/calcium exchanger), member 1, Cacna1i - calcium channel,…
GO:0060402	calcium ion transport into cytosol	0.000819	0.0242	2.45	6963	16	1950	11	[Slc8a2 - solute carrier family 8 (sodium/calcium exchanger), member 2, Slc8a3 - solute carrier family 8 (sodium/calcium exchanger), member 3, Cacna1g - calcium channel, voltage-dependent, t type, alpha 1g subunit, Ryr1l - ryanodine receptor 1-like, Pkd2 - polycystic kidney disease 2 homolog (human), Slc8a1 - solute carrier family 8 (sodium/calcium exchanger), member 1, Cacna1i - calcium channel,…
GO:0040013	negative regulation of locomotion	0.000874	0.0257	1.7	6963	61	1950	29	[Nf1 - neurofibromin 1, Apoe - apolipoprotein e, Abhd6 - abhydrolase domain containing 6, Itgav - integrin, alpha v, Nr2f2 - nuclear receptor subfamily 2, group f, member 2, Magi2 - membrane associated guanylate kinase, ww and pdz domain containing 2, Ptprj - protein tyrosine phosphatase, receptor type, j, Nisch - nischarin, Robo1 - roundabout homolog 1 (drosophila), Ptk2 - ptk2 protein tyrosine …
GO:0021700	developmental maturation	0.000887	0.026	1.75	6963	53	1950	26	[Fam20c - family with sequence similarity 20, member c, Cdk5r2 - cyclin-dependent kinase 5, regulatory subunit 2 (p39), Agpat6 - 1-acylglycerol-3-phosphate o-acyltransferase 6 (lysophosphatidic acid acyltransferase, zeta), Shank1 - sh3 and multiple ankyrin repeat domains 1, Sept4 - septin 4, Fgfr3 - fibroblast growth factor receptor 3, Map1b - microtubule-associated protein 1b, Grin1 - glutamate …
GO:0006612	protein targeting to membrane	0.000894	0.0261	2.02	6963	30	1950	17	[Srp14 - signal recognition particle 14, Srp19 - signal recognition particle 19, Gas6 - growth arrest specific 6, Arl6ip1 - adp-ribosylation factor-like 6 interacting protein 1, Palm - paralemmin, Nfasc - neurofascin, Srp54 - signal recognition particle 54a, Ssr3 - signal sequence receptor, gamma, Ank2 - ankyrin 2, neuronal, Ank1 - ankyrin 1, erythrocytic, Exoc4 - exocyst complex component 4, Mac…
GO:0050680	negative regulation of epithelial cell proliferation	0.000898	0.0262	1.87	6963	40	1950	21	[Apc - adenomatous polyposis coli, Nf1 - neurofibromin 1, Apoe - apolipoprotein e, Ptprm - protein tyrosine phosphatase, receptor type, m, Nr2f2 - nuclear receptor subfamily 2, group f, member 2, Lect1 - leukocyte cell derived chemotaxin 1, Fgfr3 - fibroblast growth factor receptor 3, Dab2ip - dab2 interacting protein, Maged1 - melanoma antigen, family d, 1, Pten - phosphatase and tensin homolog,…
GO:0050764	regulation of phagocytosis	0.000912	0.0265	2.55	6963	14	1950	10	[Myh9 - myosin, heavy chain 9, non-muscle, Bcr - breakpoint cluster region, Pten - phosphatase and tensin homolog, Abr - active bcr-related gene, Calr - calreticulin, Itgav - integrin, alpha v, Ptk2 - ptk2 protein tyrosine kinase 2, Sirpa - signal-regulatory protein alpha, Gas6 - growth arrest specific 6, Cd47 - cd47 molecule]
GO:0007214	gamma-aminobutyric acid signaling pathway	0.000912	0.0264	2.55	6963	14	1950	10	[Gabra1 - gamma-aminobutyric acid (gaba) a receptor, alpha 1, Gnai2 - guanine nucleotide binding protein (g protein), alpha inhibiting activity polypeptide 2, Cacna1a - calcium channel, voltage-dependent, p/q type, alpha 1a subunit, Slc12a2 - solute carrier family 12 (sodium/potassium/chloride transporters), member 2, Atf4 - activating transcription factor 4 (tax-responsive enhancer element b67),…
GO:0051339	regulation of lyase activity	0.000912	0.0263	2.55	6963	14	1950	10	[Rap2ip - rap2 interacting protein, Timp2 - timp metallopeptidase inhibitor 2, Nf1 - neurofibromin 1, Hrh3 - histamine receptor h3, Vipr2 - vasoactive intestinal peptide receptor 2, Palm - paralemmin, Calm3 - calmodulin 3, Calm1 - calmodulin 1, Gnal - guanine nucleotide binding protein, alpha stimulating, olfactory type, Gabbr1 - gamma-aminobutyric acid (gaba) b receptor 1]
GO:0046513	ceramide biosynthetic process	0.000912	0.0262	2.55	6963	14	1950	10	[Samd8 - sterile alpha motif domain containing 8, Smpd1 - sphingomyelin phosphodiesterase 1, acid lysosomal, Cers4 - ceramide synthase 4, B4galnt1 - beta-1,4-n-acetyl-galactosaminyl transferase 1, Cers1 - ceramide synthase 1, Sptlc1 - serine palmitoyltransferase, long chain base subunit 1, Cers5 - ceramide synthase 5, Sgms1 - sphingomyelin synthase 1, Ugt8 - udp glycosyltransferase 8, Sptlc2 - se…
GO:0006829	zinc ion transport	0.000954	0.0273	2.86	6963	10	1950	8	[Slc39a9 - solute carrier family 39 (zinc transporter), member 9, Slc39a14 - solute carrier family 39 (zinc transporter), member 14, Slc30a5 - solute carrier family 30 (zinc transporter), member 5, Slc39a11 - solute carrier family 39 (metal ion transporter), member 11, Slc39a1 - solute carrier family 39 (zinc transporter), member 1, Slc39a3 - solute carrier family 39 (zinc transporter), member 3,…
GO:0033198	response to ATP	0.000954	0.0273	2.86	6963	10	1950	8	[Hsp90b1 - heat shock protein 90, beta, member 1, Kcnj11 - potassium inwardly rectifying channel, subfamily j, member 11, Trpc3 - transient receptor potential cation channel, subfamily c, member 3, Pten - phosphatase and tensin homolog, P2rx4 - purinergic receptor p2x, ligand-gated ion channel 4, Panx1 - pannexin 1, Slc8a1 - solute carrier family 8 (sodium/calcium exchanger), member 1, Asph - asp…
GO:0042509	regulation of tyrosine phosphorylation of STAT protein	0.000954	0.0272	2.86	6963	10	1950	8	[Il6st - interleukin 6 signal transducer, Igf1 - insulin-like growth factor 1, Erbb4 - v-erb-a erythroblastic leukemia viral oncogene homolog 4 (avian), Kit - v-kit hardy-zuckerman 4 feline sarcoma viral oncogene homolog, Arl2bp - adp-ribosylation factor-like 2 binding protein, Lyn - v-yes-1 yamaguchi sarcoma viral related oncogene homolog, Fgfr3 - fibroblast growth factor receptor 3, Nf2 - neuro…
GO:0050766	positive regulation of phagocytosis	0.000954	0.0271	2.86	6963	10	1950	8	[Myh9 - myosin, heavy chain 9, non-muscle, Bcr - breakpoint cluster region, Abr - active bcr-related gene, Calr - calreticulin, Gas6 - growth arrest specific 6, Ptk2 - ptk2 protein tyrosine kinase 2, Sirpa - signal-regulatory protein alpha, Cd47 - cd47 molecule]
GO:0007413	axonal fasciculation	0.000954	0.027	2.86	6963	10	1950	8	[Ncam2 - neural cell adhesion molecule 2, Amigo1 - adhesion molecule with ig like domain 1, Rtn4 - reticulon 4, Celsr3 - cadherin, egf lag seven-pass g-type receptor 3 (flamingo homolog, drosophila), Cntn2 - contactin 2 (axonal), Sema3a - sema domain, immunoglobulin domain (ig), short basic domain, secreted, (semaphorin) 3a, Epha4 - eph receptor a4, Ephb2 - eph receptor b2]
GO:0051931	regulation of sensory perception	0.000969	0.0273	2.68	6963	12	1950	9	[Fgfr1 - fibroblast growth factor receptor 1, Ednrb - endothelin receptor type b, Rtn4 - reticulon 4, Ctss - cathepsin s, Grin2a - glutamate receptor, ionotropic, n-methyl d-aspartate 2a, Mgll - monoglyceride lipase, Slc9a1 - solute carrier family 9 (sodium/hydrogen exchanger), member 1, Grm1 - glutamate receptor, metabotropic 1, Ncam1 - neural cell adhesion molecule 1]
GO:0051930	regulation of sensory perception of pain	0.000969	0.0273	2.68	6963	12	1950	9	[Fgfr1 - fibroblast growth factor receptor 1, Ednrb - endothelin receptor type b, Ctss - cathepsin s, Rtn4 - reticulon 4, Grin2a - glutamate receptor, ionotropic, n-methyl d-aspartate 2a, Slc9a1 - solute carrier family 9 (sodium/hydrogen exchanger), member 1, Mgll - monoglyceride lipase, Grm1 - glutamate receptor, metabotropic 1, Ncam1 - neural cell adhesion molecule 1]
GO:0001755	neural crest cell migration	0.000969	0.0272	2.68	6963	12	1950	9	[Shh - sonic hedgehog, Ednrb - endothelin receptor type b, Ret - ret proto-oncogene, Erbb4 - v-erb-a erythroblastic leukemia viral oncogene homolog 4 (avian), Zeb2 - zinc finger e-box binding homeobox 2, Kitlg - kit ligand, Smo - smoothened, frizzled family receptor, Acvr1 - activin a receptor, type i, Nrp2 - neuropilin 2]
GO:0030155	regulation of cell adhesion	0.000979	0.0274	1.49	6963	115	1950	48	[Itga6 - integrin, alpha 6, Nf1 - neurofibromin 1, Adam9 - adam metallopeptidase domain 9, Ddr1 - discoidin domain receptor tyrosine kinase 1, Adam10 - adam metallopeptidase domain 10, Rell2 - relt-like 2, Cdh13 - cadherin 13, Itgav - integrin, alpha v, Myo10 - myosin x, S1pr1 - sphingosine-1-phosphate receptor 1, Srcin1 - src kinase signaling inhibitor 1, Epha7 - eph receptor a7, Nptn - neuropla…
GO:0042886	amide transport	0.000979	0.0273	2.17	6963	23	1950	14	[Cplx1 - complexin 1, Tap2 - transporter 2, atp-binding cassette, sub-family b (mdr/tap), Rims2 - regulating synaptic membrane exocytosis 2, Abcc1 - atp-binding cassette, subfamily c (cftr/mrp), member 1, Cdk16 - cyclin-dependent kinase 16, Pclo - piccolo (presynaptic cytomatrix protein), Eif2ak3 - eukaryotic translation initiation factor 2 alpha kinase 3, Myo5a - myosin va, Neurod1 - neurogenic …
GO:0035176	social behavior	0.000979	0.0272	2.17	6963	23	1950	14	[Chrnb2 - cholinergic receptor, nicotinic, beta 2 (neuronal), Vps13a - vacuolar protein sorting 13 homolog a (s. cerevisiae), Shank1 - sh3 and multiple ankyrin repeat domains 1, Mapk8ip2 - mitogen-activated protein kinase 8 interacting protein 2, Cln8 - ceroid-lipofuscinosis, neuronal 8 (epilepsy, progressive with mental retardation), Pten - phosphatase and tensin homolog, Nlgn2 - neuroligin 2, N…
GO:0031345	negative regulation of cell projection organization	0.000985	0.0273	1.79	6963	48	1950	24	[Aatk - apoptosis-associated tyrosine kinase, Ptprg - protein tyrosine phosphatase, receptor type, g, Gdi1 - gdp dissociation inhibitor 1, Sez6 - seizure related 6 homolog (mouse), Rtn4 - reticulon 4, Itm2c - integral membrane protein 2c, Itga3 - integrin, alpha 3, Prkcsh - protein kinase c substrate 80k-h, Ephb2 - eph receptor b2, Pten - phosphatase and tensin homolog, Itgb1 - integrin, beta 1, …
GO:0050773	regulation of dendrite development	0.000996	0.0275	1.72	6963	56	1950	27	[Il1rapl1 - interleukin 1 receptor accessory protein-like 1, Camk2b - calcium/calmodulin-dependent protein kinase ii beta, Sez6 - seizure related 6 homolog (mouse), Shank1 - sh3 and multiple ankyrin repeat domains 1, Lrp8 - low density lipoprotein receptor-related protein 8, apolipoprotein e receptor, Skor2-ps1 - ski family transcriptional corepressor 2, pseudogene 1, Srcin1 - src kinase signalin…

## Sheet: molecular function
GO Term	Description	P-value	FDR q-value	Enrichment	N	B	n	b	Genes
GO:0022857	transmembrane transporter activity	7.12e-49	1.98e-45	2.31	6963	351	1950	227	[Clcn4 - chloride channel 4, Grid2 - glutamate receptor, ionotropic, delta 2, P2rx4 - purinergic receptor p2x, ligand-gated ion channel 4, Slc4a4 - solute carrier family 4, sodium bicarbonate cotransporter, member 4, Sv2c - synaptic vesicle glycoprotein 2c, Slc6a13 - solute carrier family 6 (neurotransmitter transporter, gaba), member 13, Slc6a11 - solute carrier family 6 (neurotransmitter transp…
GO:0022891	substrate-specific transmembrane transporter activity	3.11e-46	4.33e-43	2.32	6963	328	1950	213	[Clcn4 - chloride channel 4, P2rx4 - purinergic receptor p2x, ligand-gated ion channel 4, Grid2 - glutamate receptor, ionotropic, delta 2, Slc4a4 - solute carrier family 4, sodium bicarbonate cotransporter, member 4, Slc6a13 - solute carrier family 6 (neurotransmitter transporter, gaba), member 13, Slc6a11 - solute carrier family 6 (neurotransmitter transporter, gaba), member 11, Slc39a7 - solute…
GO:0015075	ion transmembrane transporter activity	4.48e-45	4.16e-42	2.35	6963	305	1950	201	[Clcn4 - chloride channel 4, Grid2 - glutamate receptor, ionotropic, delta 2, P2rx4 - purinergic receptor p2x, ligand-gated ion channel 4, Slc4a4 - solute carrier family 4, sodium bicarbonate cotransporter, member 4, Slc6a13 - solute carrier family 6 (neurotransmitter transporter, gaba), member 13, Slc6a11 - solute carrier family 6 (neurotransmitter transporter, gaba), member 11, Slc39a7 - solute…
GO:0005215	transporter activity	2.9e-38	2.02e-35	2.01	6963	447	1950	251	[Clcn4 - chloride channel 4, Grid2 - glutamate receptor, ionotropic, delta 2, P2rx4 - purinergic receptor p2x, ligand-gated ion channel 4, Slc4a4 - solute carrier family 4, sodium bicarbonate cotransporter, member 4, Slc6a13 - solute carrier family 6 (neurotransmitter transporter, gaba), member 13, Sv2c - synaptic vesicle glycoprotein 2c, Slc6a11 - solute carrier family 6 (neurotransmitter transp…
GO:0022892	substrate-specific transporter activity	2.84e-36	1.58e-33	2.06	6963	387	1950	223	[Clcn4 - chloride channel 4, P2rx4 - purinergic receptor p2x, ligand-gated ion channel 4, Grid2 - glutamate receptor, ionotropic, delta 2, Slc4a4 - solute carrier family 4, sodium bicarbonate cotransporter, member 4, Slc6a13 - solute carrier family 6 (neurotransmitter transporter, gaba), member 13, Slc6a11 - solute carrier family 6 (neurotransmitter transporter, gaba), member 11, Slc39a7 - solute…
GO:0046873	metal ion transmembrane transporter activity	8.94e-35	4.15e-32	2.67	6963	158	1950	118	[Slc4a4 - solute carrier family 4, sodium bicarbonate cotransporter, member 4, Slc6a13 - solute carrier family 6 (neurotransmitter transporter, gaba), member 13, Slc6a11 - solute carrier family 6 (neurotransmitter transporter, gaba), member 11, Mcoln1 - mucolipin 1, Slc39a7 - solute carrier family 39 (zinc transporter), member 7, Slc6a1 - solute carrier family 6 (neurotransmitter transporter, gab…
GO:0008324	cation transmembrane transporter activity	2.11e-33	8.39e-31	2.29	6963	246	1950	158	[P2rx4 - purinergic receptor p2x, ligand-gated ion channel 4, Slc4a4 - solute carrier family 4, sodium bicarbonate cotransporter, member 4, Slc6a13 - solute carrier family 6 (neurotransmitter transporter, gaba), member 13, Slc6a11 - solute carrier family 6 (neurotransmitter transporter, gaba), member 11, Atp5i - atp synthase, h+ transporting, mitochondrial fo complex, subunit e, Mcoln1 - mucolipi…
GO:0004888	transmembrane signaling receptor activity	7.8e-31	2.71e-28	2.65	6963	143	1950	106	[Bai3 - brain-specific angiogenesis inhibitor 3, Ddr1 - discoidin domain receptor tyrosine kinase 1, Gpr158 - g protein-coupled receptor 158, Lgr5 - leucine rich repeat containing g protein coupled receptor 5, P2rx4 - purinergic receptor p2x, ligand-gated ion channel 4, Bmpr2 - bone morphogenetic protein receptor, type ii (serine/threonine kinase), Grm8 - glutamate receptor, metabotropic 8, Grid2…
GO:0004872	receptor activity	9.12e-28	2.82e-25	2.24	6963	222	1950	139	[Bai3 - brain-specific angiogenesis inhibitor 3, Ddr1 - discoidin domain receptor tyrosine kinase 1, Gpr158 - g protein-coupled receptor 158, Grm8 - glutamate receptor, metabotropic 8, Grid2 - glutamate receptor, ionotropic, delta 2, P2rx4 - purinergic receptor p2x, ligand-gated ion channel 4, Lgr5 - leucine rich repeat containing g protein coupled receptor 5, Bmpr2 - bone morphogenetic protein r…
GO:0022890	inorganic cation transmembrane transporter activity	1.53e-27	4.27e-25	2.28	6963	207	1950	132	[Slc4a4 - solute carrier family 4, sodium bicarbonate cotransporter, member 4, Slc6a13 - solute carrier family 6 (neurotransmitter transporter, gaba), member 13, Slc6a11 - solute carrier family 6 (neurotransmitter transporter, gaba), member 11, Atp5i - atp synthase, h+ transporting, mitochondrial fo complex, subunit e, Mcoln1 - mucolipin 1, Slc6a1 - solute carrier family 6 (neurotransmitter trans…
GO:0038023	signaling receptor activity	3.92e-27	9.91e-25	2.4	6963	171	1950	115	[Bai3 - brain-specific angiogenesis inhibitor 3, Ddr1 - discoidin domain receptor tyrosine kinase 1, Gpr158 - g protein-coupled receptor 158, Lgr5 - leucine rich repeat containing g protein coupled receptor 5, P2rx4 - purinergic receptor p2x, ligand-gated ion channel 4, Grid2 - glutamate receptor, ionotropic, delta 2, Grm8 - glutamate receptor, metabotropic 8, Bmpr2 - bone morphogenetic protein r…
GO:0022838	substrate-specific channel activity	1.56e-26	3.62e-24	2.55	6963	137	1950	98	[Clcn4 - chloride channel 4, Grid2 - glutamate receptor, ionotropic, delta 2, P2rx4 - purinergic receptor p2x, ligand-gated ion channel 4, Mcoln1 - mucolipin 1, Slc1a4 - solute carrier family 1 (glutamate/neutral amino acid transporter), member 4, Accn2 - amiloride-sensitive cation channel 2, neuronal, Accn1 - amiloride-sensitive cation channel 1, neuronal, Rasa3 - ras p21 protein activator 3, Pk…
GO:0005216	ion channel activity	4.11e-26	8.81e-24	2.55	6963	136	1950	97	[Clcn4 - chloride channel 4, P2rx4 - purinergic receptor p2x, ligand-gated ion channel 4, Grid2 - glutamate receptor, ionotropic, delta 2, Mcoln1 - mucolipin 1, Slc1a4 - solute carrier family 1 (glutamate/neutral amino acid transporter), member 4, Accn2 - amiloride-sensitive cation channel 2, neuronal, Accn1 - amiloride-sensitive cation channel 1, neuronal, Rasa3 - ras p21 protein activator 3, Pk…
GO:0022803	passive transmembrane transporter activity	8.01e-26	1.59e-23	2.49	6963	145	1950	101	[Clcn4 - chloride channel 4, P2rx4 - purinergic receptor p2x, ligand-gated ion channel 4, Grid2 - glutamate receptor, ionotropic, delta 2, Mcoln1 - mucolipin 1, Slc1a4 - solute carrier family 1 (glutamate/neutral amino acid transporter), member 4, Accn2 - amiloride-sensitive cation channel 2, neuronal, Accn1 - amiloride-sensitive cation channel 1, neuronal, Rasa3 - ras p21 protein activator 3, Pk…
GO:0015267	channel activity	8.01e-26	1.49e-23	2.49	6963	145	1950	101	[Clcn4 - chloride channel 4, Grid2 - glutamate receptor, ionotropic, delta 2, P2rx4 - purinergic receptor p2x, ligand-gated ion channel 4, Mcoln1 - mucolipin 1, Slc1a4 - solute carrier family 1 (glutamate/neutral amino acid transporter), member 4, Accn2 - amiloride-sensitive cation channel 2, neuronal, Accn1 - amiloride-sensitive cation channel 1, neuronal, Rasa3 - ras p21 protein activator 3, Pk…
GO:0015081	sodium ion transmembrane transporter activity	1.56e-23	2.72e-21	3.36	6963	51	1950	48	[Scn4b - sodium channel, voltage-gated, type iv, beta, Slc23a2 - solute carrier family 23 (nucleobase transporters), member 2, Slc8a1 - solute carrier family 8 (sodium/calcium exchanger), member 1, Slc4a4 - solute carrier family 4, sodium bicarbonate cotransporter, member 4, Slc32a1 - solute carrier family 32 (gaba vesicular transporter), member 1, Slc6a13 - solute carrier family 6 (neurotransmit…
GO:0022839	ion gated channel activity	1.93e-21	3.15e-19	2.5	6963	117	1950	82	[Kcnd2 - potassium voltage-gated channel, shal-related subfamily, member 2, Clcn4 - chloride channel 4, P2rx4 - purinergic receptor p2x, ligand-gated ion channel 4, Grid2 - glutamate receptor, ionotropic, delta 2, Mcoln1 - mucolipin 1, Kcnc3 - potassium voltage gated channel, shaw-related subfamily, member 3, Catsper2 - cation channel, sperm associated 2, Nalcn - sodium leak channel, non-selectiv…
GO:0022836	gated channel activity	1.93e-21	2.98e-19	2.5	6963	117	1950	82	[Kcnd2 - potassium voltage-gated channel, shal-related subfamily, member 2, Clcn4 - chloride channel 4, P2rx4 - purinergic receptor p2x, ligand-gated ion channel 4, Grid2 - glutamate receptor, ionotropic, delta 2, Mcoln1 - mucolipin 1, Kcnc3 - potassium voltage gated channel, shaw-related subfamily, member 3, Catsper2 - cation channel, sperm associated 2, Nalcn - sodium leak channel, non-selectiv…
GO:0005261	cation channel activity	1.8e-20	2.64e-18	2.6	6963	99	1950	72	[Kcnd2 - potassium voltage-gated channel, shal-related subfamily, member 2, P2rx4 - purinergic receptor p2x, ligand-gated ion channel 4, Mcoln1 - mucolipin 1, Kcnc3 - potassium voltage gated channel, shaw-related subfamily, member 3, Catsper2 - cation channel, sperm associated 2, Nalcn - sodium leak channel, non-selective, Grin1 - glutamate receptor, ionotropic, n-methyl d-aspartate 1, Accn2 - am…
GO:0004871	signal transducer activity	1.55e-18	2.16e-16	1.87	6963	281	1950	147	[Bai3 - brain-specific angiogenesis inhibitor 3, Ddr1 - discoidin domain receptor tyrosine kinase 1, Gpr158 - g protein-coupled receptor 158, Lgr5 - leucine rich repeat containing g protein coupled receptor 5, P2rx4 - purinergic receptor p2x, ligand-gated ion channel 4, Grid2 - glutamate receptor, ionotropic, delta 2, Grm8 - glutamate receptor, metabotropic 8, Plcb4 - phospholipase c, beta 4, Bmp…
GO:0060089	molecular transducer activity	1.55e-18	2.06e-16	1.87	6963	281	1950	147	[Bai3 - brain-specific angiogenesis inhibitor 3, Ddr1 - discoidin domain receptor tyrosine kinase 1, Gpr158 - g protein-coupled receptor 158, Lgr5 - leucine rich repeat containing g protein coupled receptor 5, P2rx4 - purinergic receptor p2x, ligand-gated ion channel 4, Grid2 - glutamate receptor, ionotropic, delta 2, Grm8 - glutamate receptor, metabotropic 8, Plcb4 - phospholipase c, beta 4, Bmp…
GO:0072509	divalent inorganic cation transmembrane transporter activity	3.65e-18	4.61e-16	2.82	6963	67	1950	53	[Slc39a14 - solute carrier family 39 (zinc transporter), member 14, Slc30a5 - solute carrier family 30 (zinc transporter), member 5, Mcoln1 - mucolipin 1, Nipa1 - non imprinted in prader-willi/angelman syndrome 1, Catsper2 - cation channel, sperm associated 2, Slc39a1 - solute carrier family 39 (zinc transporter), member 1, Grin1 - glutamate receptor, ionotropic, n-methyl d-aspartate 1, Ryr2 - ry…
GO:0022804	active transmembrane transporter activity	4.57e-18	5.53e-16	2.36	6963	118	1950	78	[Slc23a2 - solute carrier family 23 (nucleobase transporters), member 2, Clcn4 - chloride channel 4, Tap2 - transporter 2, atp-binding cassette, sub-family b (mdr/tap), Atp8a1 - atpase, aminophospholipid transporter (aplt), class i, type 8a, member 1, Slc4a4 - solute carrier family 4, sodium bicarbonate cotransporter, member 4, Slc6a13 - solute carrier family 6 (neurotransmitter transporter, gaba…
GO:0005509	calcium ion binding	2.66e-17	3.09e-15	2	6963	202	1950	113	[Pcdh7 - protocadherin 7, Lman1 - lectin, mannose-binding, 1, Plcb4 - phospholipase c, beta 4, Creld1 - cysteine-rich with egf-like domains 1, Plcd3 - phospholipase c, delta 3, Fstl1 - follistatin-like 1, Sdf4 - stromal cell derived factor 4, Syt11 - synaptotagmin xi, Pcdhb20 - protocadherin beta 20, Megf8 - multiple egf-like-domains 8, S100a16 - s100 calcium binding protein a16, Tbc1d9 - tbc1 do…
GO:0008509	anion transmembrane transporter activity	1.25e-16	1.39e-14	2.57	6963	82	1950	59	[Slc23a2 - solute carrier family 23 (nucleobase transporters), member 2, Clcn4 - chloride channel 4, Ano4 - anoctamin 4, Slc4a4 - solute carrier family 4, sodium bicarbonate cotransporter, member 4, Slc6a13 - solute carrier family 6 (neurotransmitter transporter, gaba), member 13, Slc6a11 - solute carrier family 6 (neurotransmitter transporter, gaba), member 11, Slc1a2 - solute carrier family 1 (…
GO:0015085	calcium ion transmembrane transporter activity	2.66e-16	2.85e-14	2.95	6963	52	1950	43	[Il1rapl1 - interleukin 1 receptor accessory protein-like 1, Cacnb3 - calcium channel, voltage-dependent, beta 3 subunit, Cacna1g - calcium channel, voltage-dependent, t type, alpha 1g subunit, Slc8a1 - solute carrier family 8 (sodium/calcium exchanger), member 1, Itgav - integrin, alpha v, Mcoln1 - mucolipin 1, Catsper2 - cation channel, sperm associated 2, Grin1 - glutamate receptor, ionotropic…
GO:0015077	monovalent inorganic cation transmembrane transporter activity	4.52e-15	4.66e-13	2.11	6963	142	1950	84	[Slc23a2 - solute carrier family 23 (nucleobase transporters), member 2, Kcnd2 - potassium voltage-gated channel, shal-related subfamily, member 2, Slc4a4 - solute carrier family 4, sodium bicarbonate cotransporter, member 4, Slc6a13 - solute carrier family 6 (neurotransmitter transporter, gaba), member 13, Slc6a11 - solute carrier family 6 (neurotransmitter transporter, gaba), member 11, Atp5i -…
GO:0015291	secondary active transmembrane transporter activity	5.88e-15	5.85e-13	2.71	6963	62	1950	47	[Slc23a2 - solute carrier family 23 (nucleobase transporters), member 2, Clcn4 - chloride channel 4, Clcn3 - chloride channel 3, Slc8a1 - solute carrier family 8 (sodium/calcium exchanger), member 1, Slc12a6 - solute carrier family 12, member 6, Slc4a4 - solute carrier family 4, sodium bicarbonate cotransporter, member 4, Clcn7 - chloride channel 7, Slc32a1 - solute carrier family 32 (gaba vesicu…
GO:0022832	voltage-gated channel activity	3.98e-13	3.82e-11	2.38	6963	81	1950	54	[Kcnd2 - potassium voltage-gated channel, shal-related subfamily, member 2, Clcn4 - chloride channel 4, Kcnc3 - potassium voltage gated channel, shaw-related subfamily, member 3, Catsper2 - cation channel, sperm associated 2, Nalcn - sodium leak channel, non-selective, Grin1 - glutamate receptor, ionotropic, n-methyl d-aspartate 1, Clcn6 - chloride channel 6, Accn1 - amiloride-sensitive cation ch…
GO:0005244	voltage-gated ion channel activity	3.98e-13	3.7e-11	2.38	6963	81	1950	54	[Kcnd2 - potassium voltage-gated channel, shal-related subfamily, member 2, Clcn4 - chloride channel 4, Kcnc3 - potassium voltage gated channel, shaw-related subfamily, member 3, Catsper2 - cation channel, sperm associated 2, Nalcn - sodium leak channel, non-selective, Grin1 - glutamate receptor, ionotropic, n-methyl d-aspartate 1, Clcn6 - chloride channel 6, Accn1 - amiloride-sensitive cation ch…
GO:0022843	voltage-gated cation channel activity	8.83e-13	7.93e-11	2.63	6963	57	1950	42	[Scn4b - sodium channel, voltage-gated, type iv, beta, Il1rapl1 - interleukin 1 receptor accessory protein-like 1, Kcnd2 - potassium voltage-gated channel, shal-related subfamily, member 2, Cacnb3 - calcium channel, voltage-dependent, beta 3 subunit, Kcna6 - potassium voltage gated channel, shaker related subfamily, member 6, Cacna1g - calcium channel, voltage-dependent, t type, alpha 1g subunit,…
GO:0005262	calcium channel activity	3.7e-12	3.22e-10	2.87	6963	41	1950	33	[Il1rapl1 - interleukin 1 receptor accessory protein-like 1, Cacnb3 - calcium channel, voltage-dependent, beta 3 subunit, Cacna1g - calcium channel, voltage-dependent, t type, alpha 1g subunit, Itgav - integrin, alpha v, Mcoln1 - mucolipin 1, Catsper2 - cation channel, sperm associated 2, Grin1 - glutamate receptor, ionotropic, n-methyl d-aspartate 1, Cacng2 - calcium channel, voltage-dependent, …
GO:0022834	ligand-gated channel activity	5.05e-12	4.26e-10	2.78	6963	45	1950	35	[Grid2 - glutamate receptor, ionotropic, delta 2, P2rx4 - purinergic receptor p2x, ligand-gated ion channel 4, Mcoln1 - mucolipin 1, Gabrb2 - gamma-aminobutyric acid (gaba) a receptor, beta 2, Kcnj9 - potassium inwardly-rectifying channel, subfamily j, member 9, Glrb - glycine receptor, beta, Kcnj11 - potassium inwardly rectifying channel, subfamily j, member 11, Grik4 - glutamate receptor, ionot…
GO:0015276	ligand-gated ion channel activity	5.05e-12	4.13e-10	2.78	6963	45	1950	35	[P2rx4 - purinergic receptor p2x, ligand-gated ion channel 4, Grid2 - glutamate receptor, ionotropic, delta 2, Mcoln1 - mucolipin 1, Gabrb2 - gamma-aminobutyric acid (gaba) a receptor, beta 2, Kcnj9 - potassium inwardly-rectifying channel, subfamily j, member 9, Glrb - glycine receptor, beta, Kcnj11 - potassium inwardly rectifying channel, subfamily j, member 11, Grik4 - glutamate receptor, ionot…
GO:0016758	transferase activity, transferring hexosyl groups	1.15e-10	9.12e-09	2.33	6963	69	1950	45	[Pomgnt1 - protein o-linked mannose beta1,2-n-acetylglucosaminyltransferase, B3gat1 - beta-1,3-glucuronyltransferase 1 (glucuronosyltransferase p), B3gnt1 - udp-glcnac:betagal beta-1,3-n-acetylglucosaminyltransferase 1, Ugcg - udp-glucose ceramide glucosyltransferase, Xylt2 - xylosyltransferase ii, Pygb - phosphorylase, glycogen; brain, B4galt3 - udp-gal:betaglcnac beta 1,4-galactosyltransferase,…
GO:0015293	symporter activity	8.36e-10	6.47e-08	2.68	6963	40	1950	30	[Slc23a2 - solute carrier family 23 (nucleobase transporters), member 2, Slc4a4 - solute carrier family 4, sodium bicarbonate cotransporter, member 4, Slc12a6 - solute carrier family 12, member 6, Slc32a1 - solute carrier family 32 (gaba vesicular transporter), member 1, Slc25a3 - solute carrier family 25 (mitochondrial carrier, phosphate carrier), member 3, Slc6a13 - solute carrier family 6 (neu…
GO:0019199	transmembrane receptor protein kinase activity	8.97e-10	6.76e-08	3.04	6963	27	1950	23	[Fgfr1 - fibroblast growth factor receptor 1, Bmpr1a - bone morphogenetic protein receptor, type ia, Ntrk3 - neurotrophic tyrosine kinase, receptor, type 3, Ddr1 - discoidin domain receptor tyrosine kinase 1, Erbb4 - v-erb-a erythroblastic leukemia viral oncogene homolog 4 (avian), Tyro3 - tyro3 protein tyrosine kinase, Bmpr2 - bone morphogenetic protein receptor, type ii (serine/threonine kinase…
GO:0015297	antiporter activity	1.83e-09	1.34e-07	3.12	6963	24	1950	21	[Slc24a3 - solute carrier family 24 (sodium/potassium/calcium exchanger), member 3, Clcn4 - chloride channel 4, Clcn3 - chloride channel 3, Slc4a4 - solute carrier family 4, sodium bicarbonate cotransporter, member 4, Slc8a1 - solute carrier family 8 (sodium/calcium exchanger), member 1, Clcn7 - chloride channel 7, Slc4a10 - solute carrier family 4, sodium bicarbonate transporter, member 10, Slc4…
GO:0016757	transferase activity, transferring glycosyl groups	1.86e-09	1.33e-07	2.02	6963	99	1950	56	[Pomgnt1 - protein o-linked mannose beta1,2-n-acetylglucosaminyltransferase, B3gat1 - beta-1,3-glucuronyltransferase 1 (glucuronosyltransferase p), B3gnt1 - udp-glcnac:betagal beta-1,3-n-acetylglucosaminyltransferase 1, Xylt2 - xylosyltransferase ii, Galnt1 - udp-n-acetyl-alpha-d-galactosamine:polypeptide n-acetylgalactosaminyltransferase 1 (galnac-t1), B4galt3 - udp-gal:betaglcnac beta 1,4-galac…
GO:0015103	inorganic anion transmembrane transporter activity	2.19e-09	1.53e-07	2.7	6963	37	1950	28	[Clcn4 - chloride channel 4, Ano4 - anoctamin 4, Clcn3 - chloride channel 3, Slc4a4 - solute carrier family 4, sodium bicarbonate cotransporter, member 4, Slc12a6 - solute carrier family 12, member 6, Clcn7 - chloride channel 7, Clcn2 - chloride channel 2, Ttyh3 - tweety homolog 3 (drosophila), Slc25a3 - solute carrier family 25 (mitochondrial carrier, phosphate carrier), member 3, Gabrb2 - gamma…
GO:0005272	sodium channel activity	4.92e-09	3.34e-07	3.57	6963	15	1950	15	[Scn4b - sodium channel, voltage-gated, type iv, beta, Scn3a - sodium channel, voltage-gated, type iii, alpha, Pkd2 - polycystic kidney disease 2 homolog (human), Hcn3 - hyperpolarization-activated cyclic nucleotide-gated potassium channel 3, Hcn2 - hyperpolarization activated cyclic nucleotide-gated potassium channel 2, Scn2b - sodium channel, voltage-gated, type ii, beta, Scn2a1 - sodium channe…
GO:0008194	UDP-glycosyltransferase activity	6.05e-09	4.01e-07	2.59	6963	40	1950	29	[Pomgnt1 - protein o-linked mannose beta1,2-n-acetylglucosaminyltransferase, B3gat1 - beta-1,3-glucuronyltransferase 1 (glucuronosyltransferase p), B3gnt1 - udp-glcnac:betagal beta-1,3-n-acetylglucosaminyltransferase 1, Ugcg - udp-glucose ceramide glucosyltransferase, Xylt2 - xylosyltransferase ii, Galnt1 - udp-n-acetyl-alpha-d-galactosamine:polypeptide n-acetylgalactosaminyltransferase 1 (galnac…
GO:0005230	extracellular ligand-gated ion channel activity	8.42e-09	5.45e-07	3	6963	25	1950	21	[Chrnb2 - cholinergic receptor, nicotinic, beta 2 (neuronal), Grid2 - glutamate receptor, ionotropic, delta 2, P2rx4 - purinergic receptor p2x, ligand-gated ion channel 4, Grin2c - glutamate receptor, ionotropic, n-methyl d-aspartate 2c, Grin2b - glutamate receptor, ionotropic, n-methyl d-aspartate 2b, Gabrb2 - gamma-aminobutyric acid (gaba) a receptor, beta 2, Grin2a - glutamate receptor, ionotr…
GO:0004930	G-protein coupled receptor activity	1.26e-08	7.96e-07	2.19	6963	67	1950	41	[Bai3 - brain-specific angiogenesis inhibitor 3, Gpr158 - g protein-coupled receptor 158, Grm8 - glutamate receptor, metabotropic 8, Lgr5 - leucine rich repeat containing g protein coupled receptor 5, Adcyap1r1 - adenylate cyclase activating polypeptide 1 receptor 1, Gprc5b - g protein-coupled receptor, family c, group 5, member b, S1pr1 - sphingosine-1-phosphate receptor 1, Opn3 - opsin 3, Nisch…
GO:0008514	organic anion transmembrane transporter activity	3.89e-08	2.4e-06	2.5	6963	40	1950	28	[Slc23a2 - solute carrier family 23 (nucleobase transporters), member 2, Slc7a10 - solute carrier family 7 (neutral amino acid transporter light chain, asc system), member 10, Slc35b2 - solute carrier family 35, member b2, Sfxn5 - sideroflexin 5, Slc32a1 - solute carrier family 32 (gaba vesicular transporter), member 1, Slc6a13 - solute carrier family 6 (neurotransmitter transporter, gaba), membe…
GO:0015108	chloride transmembrane transporter activity	4.13e-08	2.5e-06	2.74	6963	30	1950	23	[Clcn4 - chloride channel 4, Ano4 - anoctamin 4, Clcn3 - chloride channel 3, Slc12a6 - solute carrier family 12, member 6, Clic4 - chloride intracellular channel 4, Clcn7 - chloride channel 7, Ttyh3 - tweety homolog 3 (drosophila), Clcn2 - chloride channel 2, Slc12a5 - solute carrier family 12 (potassium-chloride transporter), member 5, Gabrb2 - gamma-aminobutyric acid (gaba) a receptor, beta 2, …
GO:0005342	organic acid transmembrane transporter activity	4.31e-08	2.55e-06	2.58	6963	36	1950	26	[Slc23a2 - solute carrier family 23 (nucleobase transporters), member 2, Slc7a10 - solute carrier family 7 (neutral amino acid transporter light chain, asc system), member 10, Slc32a1 - solute carrier family 32 (gaba vesicular transporter), member 1, Sfxn5 - sideroflexin 5, Slc6a13 - solute carrier family 6 (neurotransmitter transporter, gaba), member 13, Slc6a11 - solute carrier family 6 (neurot…
GO:0046943	carboxylic acid transmembrane transporter activity	4.31e-08	2.5e-06	2.58	6963	36	1950	26	[Slc7a10 - solute carrier family 7 (neutral amino acid transporter light chain, asc system), member 10, Slc23a2 - solute carrier family 23 (nucleobase transporters), member 2, Slc32a1 - solute carrier family 32 (gaba vesicular transporter), member 1, Sfxn5 - sideroflexin 5, Slc6a13 - solute carrier family 6 (neurotransmitter transporter, gaba), member 13, Slc6a11 - solute carrier family 6 (neurot…
GO:0005178	integrin binding	4.33e-08	2.46e-06	2.68	6963	32	1950	24	[Timp2 - timp metallopeptidase inhibitor 2, Igf1 - insulin-like growth factor 1, Itga6 - integrin, alpha 6, Vwf - von willebrand factor, Calr - calreticulin, Adam9 - adam metallopeptidase domain 9, Dmd - dystrophin, Itga7 - integrin, alpha 7, Itga3 - integrin, alpha 3, Ppap2b - phosphatidic acid phosphatase type 2b, Lyn - v-yes-1 yamaguchi sarcoma viral related oncogene homolog, Cd9 - cd9 molecul…
GO:0004714	transmembrane receptor protein tyrosine kinase activity	5.64e-08	3.14e-06	3.06	6963	21	1950	18	[Fgfr1 - fibroblast growth factor receptor 1, Ntrk3 - neurotrophic tyrosine kinase, receptor, type 3, Ddr1 - discoidin domain receptor tyrosine kinase 1, Tyro3 - tyro3 protein tyrosine kinase, Erbb4 - v-erb-a erythroblastic leukemia viral oncogene homolog 4 (avian), Flt3 - fms-related tyrosine kinase 3, Fgfr3 - fibroblast growth factor receptor 3, Epha7 - eph receptor a7, Nrg2 - neuregulin 2, Eph…
GO:0005231	excitatory extracellular ligand-gated ion channel activity	5.81e-08	3.17e-06	3.35	6963	16	1950	15	[Chrnb2 - cholinergic receptor, nicotinic, beta 2 (neuronal), P2rx4 - purinergic receptor p2x, ligand-gated ion channel 4, Grid2 - glutamate receptor, ionotropic, delta 2, Grin2c - glutamate receptor, ionotropic, n-methyl d-aspartate 2c, Grin2b - glutamate receptor, ionotropic, n-methyl d-aspartate 2b, Grin2a - glutamate receptor, ionotropic, n-methyl d-aspartate 2a, Glrb - glycine receptor, beta…
GO:0005102	receptor binding	7.65e-08	4.1e-06	1.4	6963	449	1950	176	[A2m - alpha-2-macroglobulin, Vwf - von willebrand factor, Arhgef12 - rho guanine nucleotide exchange factor (gef) 12, Trim37 - tripartite motif-containing 37, Creb3 - camp responsive element binding protein 3, P2rx4 - purinergic receptor p2x, ligand-gated ion channel 4, Reep1 - receptor accessory protein 1, Ppap2b - phosphatidic acid phosphatase type 2b, Ywhag - tyrosine 3-monooxygenase/tryptoph…
GO:0015079	potassium ion transmembrane transporter activity	2.22e-07	1.16e-05	2.24	6963	51	1950	32	[Kcnd2 - potassium voltage-gated channel, shal-related subfamily, member 2, Kcna6 - potassium voltage gated channel, shaker related subfamily, member 6, Kcng4 - potassium voltage-gated channel, subfamily g, member 4, Kcnc3 - potassium voltage gated channel, shaw-related subfamily, member 3, Kcnj9 - potassium inwardly-rectifying channel, subfamily j, member 9, Kcnj11 - potassium inwardly rectifyin…
GO:0015296	anion:cation symporter activity	2.27e-07	1.17e-05	3.57	6963	12	1950	12	[Slc1a6 - solute carrier family 1 (high affinity aspartate/glutamate transporter), member 6, Slc20a1 - solute carrier family 20 (phosphate transporter), member 1, Slc17a7 - solute carrier family 17 (sodium-dependent inorganic phosphate cotransporter), member 7, Slc12a6 - solute carrier family 12, member 6, Slc1a4 - solute carrier family 1 (glutamate/neutral amino acid transporter), member 4, Slc4…
GO:0017171	serine hydrolase activity	3.07e-07	1.56e-05	2.57	6963	32	1950	23	[Dpp10 - dipeptidylpeptidase 10, Prepl - prolyl endopeptidase-like, Scpep1 - serine carboxypeptidase 1, Aadacl1 - arylacetamide deacetylase-like 1, Dpp8 - dipeptidylpeptidase 8, Pcsk2 - proprotein convertase subtilisin/kexin type 2, Dpp6 - dipeptidylpeptidase 6, Pcsk7 - proprotein convertase subtilisin/kexin type 7, Plat - plasminogen activator, tissue, Ctsh - cathepsin h, Pcsk6 - proprotein conv…
GO:0015294	solute:cation symporter activity	3.16e-07	1.57e-05	2.62	6963	30	1950	22	[Slc23a2 - solute carrier family 23 (nucleobase transporters), member 2, Slc17a7 - solute carrier family 17 (sodium-dependent inorganic phosphate cotransporter), member 7, Slc4a4 - solute carrier family 4, sodium bicarbonate cotransporter, member 4, Slc12a6 - solute carrier family 12, member 6, Slc32a1 - solute carrier family 32 (gaba vesicular transporter), member 1, Slc25a3 - solute carrier fam…
GO:0008066	glutamate receptor activity	3.65e-07	1.78e-05	3.15	6963	17	1950	15	[Grm8 - glutamate receptor, metabotropic 8, Grid2 - glutamate receptor, ionotropic, delta 2, Grin2c - glutamate receptor, ionotropic, n-methyl d-aspartate 2c, Grin2b - glutamate receptor, ionotropic, n-methyl d-aspartate 2b, Grin2a - glutamate receptor, ionotropic, n-methyl d-aspartate 2a, Grm3 - glutamate receptor, metabotropic 3, Grm1 - glutamate receptor, metabotropic 1, Grik1 - glutamate rece…
GO:0004713	protein tyrosine kinase activity	6.01e-07	2.89e-05	2.23	6963	48	1950	30	[Aatk - apoptosis-associated tyrosine kinase, Ddr1 - discoidin domain receptor tyrosine kinase 1, Tyro3 - tyro3 protein tyrosine kinase, Tnk2 - tyrosine kinase, non-receptor, 2, Fgfr3 - fibroblast growth factor receptor 3, Flt3 - fms-related tyrosine kinase 3, Epha7 - eph receptor a7, Ephb2 - eph receptor b2, Epha5 - epha5, Src - v-src sarcoma (schmidt-ruppin a-2) viral oncogene homolog (avian), …
GO:0004175	endopeptidase activity	6.64e-07	3.14e-05	1.82	6963	102	1950	52	[Ctsb - cathepsin b, Prepl - prolyl endopeptidase-like, Ncstn - nicastrin, Adam9 - adam metallopeptidase domain 9, Mme - membrane metallo-endopeptidase, Adam10 - adam metallopeptidase domain 10, Plat - plasminogen activator, tissue, Psma4 - proteasome (prosome, macropain) subunit, alpha type 4, Pcsk6 - proprotein convertase subtilisin/kexin type 6, Capns1 - calpain, small subunit 1, Psma7 - prote…
GO:0008236	serine-type peptidase activity	7.99e-07	3.71e-05	2.53	6963	31	1950	22	[Prepl - prolyl endopeptidase-like, Dpp10 - dipeptidylpeptidase 10, Scpep1 - serine carboxypeptidase 1, Dpp8 - dipeptidylpeptidase 8, Pcsk2 - proprotein convertase subtilisin/kexin type 2, Dpp6 - dipeptidylpeptidase 6, Pcsk7 - proprotein convertase subtilisin/kexin type 7, Plat - plasminogen activator, tissue, Ctsh - cathepsin h, Pcsk6 - proprotein convertase subtilisin/kexin type 6, Mbtps1 - mem…
GO:0015171	amino acid transmembrane transporter activity	7.99e-07	3.65e-05	2.53	6963	31	1950	22	[Slc7a10 - solute carrier family 7 (neutral amino acid transporter light chain, asc system), member 10, Serinc3 - serine incorporator 3, Slc32a1 - solute carrier family 32 (gaba vesicular transporter), member 1, Slc6a13 - solute carrier family 6 (neurotransmitter transporter, gaba), member 13, Slc6a11 - solute carrier family 6 (neurotransmitter transporter, gaba), member 11, Slc1a2 - solute carri…
GO:0015491	cation:cation antiporter activity	8.14e-07	3.66e-05	3.57	6963	11	1950	11	[Slc8a2 - solute carrier family 8 (sodium/calcium exchanger), member 2, Slc9a7 - solute carrier family 9 (sodium/hydrogen exchanger), member 7, Slc8a3 - solute carrier family 8 (sodium/calcium exchanger), member 3, Slc24a3 - solute carrier family 24 (sodium/potassium/calcium exchanger), member 3, Slc24a2 - solute carrier family 24 (sodium/potassium/calcium exchanger), member 2, Slc9a3 - solute ca…
GO:0019838	growth factor binding	1.5e-06	6.65e-05	2.38	6963	36	1950	24	[Il1rapl1 - interleukin 1 receptor accessory protein-like 1, Fgfr1 - fibroblast growth factor receptor 1, A2m - alpha-2-macroglobulin, Pdgfa - platelet-derived growth factor alpha polypeptide, Glg1 - golgi glycoprotein 1, Col5a1 - collagen, type v, alpha 1, Bmpr2 - bone morphogenetic protein receptor, type ii (serine/threonine kinase), Itgav - integrin, alpha v, Lifr - leukemia inhibitory factor …
GO:0005245	voltage-gated calcium channel activity	1.62e-06	7.05e-05	2.98	6963	18	1950	15	[Il1rapl1 - interleukin 1 receptor accessory protein-like 1, Cacna2d2 - calcium channel, voltage-dependent, alpha 2/delta subunit 2, Cacnb3 - calcium channel, voltage-dependent, beta 3 subunit, Cacna1g - calcium channel, voltage-dependent, t type, alpha 1g subunit, Cacna1e - calcium channel, voltage-dependent, r type, alpha 1e subunit, Pkd2 - polycystic kidney disease 2 homolog (human), Cacna1i -…
GO:0042626	ATPase activity, coupled to transmembrane movement of substances	2.09e-06	8.94e-05	2.14	6963	50	1950	30	[Atp13a2 - atpase type 13a2, Tap2 - transporter 2, atp-binding cassette, sub-family b (mdr/tap), Atp8a1 - atpase, aminophospholipid transporter (aplt), class i, type 8a, member 1, Atp6ap1 - atpase, h+ transporting, lysosomal accessory protein 1, Myh9 - myosin, heavy chain 9, non-muscle, Atp13a3 - atpase type 13a3, Atp6v0c - atpase, h+ transporting, lysosomal v0 subunit c, Abcb6 - atp-binding cass…
GO:0004970	ionotropic glutamate receptor activity	2.19e-06	9.25e-05	3.3	6963	13	1950	12	[Grik1 - glutamate receptor, ionotropic, kainate 1, Grik4 - glutamate receptor, ionotropic, kainate 4, Grid2 - glutamate receptor, ionotropic, delta 2, Grin1 - glutamate receptor, ionotropic, n-methyl d-aspartate 1, Grin2c - glutamate receptor, ionotropic, n-methyl d-aspartate 2c, Grin2b - glutamate receptor, ionotropic, n-methyl d-aspartate 2b, Grin2a - glutamate receptor, ionotropic, n-methyl d…
GO:0015298	solute:cation antiporter activity	2.19e-06	9.11e-05	3.3	6963	13	1950	12	[Slc8a2 - solute carrier family 8 (sodium/calcium exchanger), member 2, Slc9a7 - solute carrier family 9 (sodium/hydrogen exchanger), member 7, Slc8a3 - solute carrier family 8 (sodium/calcium exchanger), member 3, Tmco3 - transmembrane and coiled-coil domains 3, Slc24a3 - solute carrier family 24 (sodium/potassium/calcium exchanger), member 3, Slc24a2 - solute carrier family 24 (sodium/potassium…
GO:0005234	extracellular-glutamate-gated ion channel activity	2.19e-06	8.98e-05	3.3	6963	13	1950	12	[Grik1 - glutamate receptor, ionotropic, kainate 1, Grik4 - glutamate receptor, ionotropic, kainate 4, Grid2 - glutamate receptor, ionotropic, delta 2, Grin1 - glutamate receptor, ionotropic, n-methyl d-aspartate 1, Grin2c - glutamate receptor, ionotropic, n-methyl d-aspartate 2c, Grin2b - glutamate receptor, ionotropic, n-methyl d-aspartate 2b, Grin2a - glutamate receptor, ionotropic, n-methyl d…
GO:0030246	carbohydrate binding	2.4e-06	9.7e-05	1.93	6963	72	1950	39	[Cdipt - cdp-diacylglycerol--inositol 3-phosphatidyltransferase, Lman1 - lectin, mannose-binding, 1, Fuca1 - fucosidase, alpha-l- 1, tissue, Nomo1 - nodal modulator 1, Mlec - malectin, Man2b1 - mannosidase, alpha, class 2b, member 1, Pygb - phosphorylase, glycogen; brain, Hexb - hexosaminidase b, Tkt - transketolase, Pfkl - phosphofructokinase, liver, Agl - amylo-alpha-1, 6-glucosidase, 4-alpha-g…
GO:0005248	voltage-gated sodium channel activity	2.92e-06	0.000116	3.57	6963	10	1950	10	[Scn4b - sodium channel, voltage-gated, type iv, beta, Scn4a - sodium channel, voltage-gated, type iv, alpha subunit, Pkd2 - polycystic kidney disease 2 homolog (human), Scn3a - sodium channel, voltage-gated, type iii, alpha, Scn1a - sodium channel, voltage-gated, type i, alpha, Scn2b - sodium channel, voltage-gated, type ii, beta, Scn2a1 - sodium channel, voltage-gated, type ii, alpha 1, Scn1b -…
GO:0030165	PDZ domain binding	3.41e-06	0.000134	2.03	6963	58	1950	33	[Dmd - dystrophin, Grid2 - glutamate receptor, ionotropic, delta 2, Clcn3 - chloride channel 3, Lnx1 - ligand of numb-protein x 1, Magi2 - membrane associated guanylate kinase, ww and pdz domain containing 2, Dlg1 - discs, large homolog 1 (drosophila), Apba1 - amyloid beta (a4) precursor protein-binding, family a, member 1, Exoc4 - exocyst complex component 4, Adam17 - adam metallopeptidase domai…
GO:0097367	carbohydrate derivative binding	3.41e-06	0.000132	2.03	6963	58	1950	33	[Col23a1 - collagen, type xxiii, alpha 1, Apoe - apolipoprotein e, Col5a1 - collagen, type v, alpha 1, Nell1 - nel-like 1 (chicken), Nell2 - nel-like 2 (chicken), Pfkl - phosphofructokinase, liver, Fstl1 - follistatin-like 1, Apoa5 - apolipoprotein a-v, Ncan - neurocan, Crispld2 - cysteine-rich secretory protein lccl domain containing 2, Pcsk6 - proprotein convertase subtilisin/kexin type 6, Gns …
GO:0043492	ATPase activity, coupled to movement of substances	3.72e-06	0.000142	2.1	6963	51	1950	30	[Atp13a2 - atpase type 13a2, Tap2 - transporter 2, atp-binding cassette, sub-family b (mdr/tap), Atp8a1 - atpase, aminophospholipid transporter (aplt), class i, type 8a, member 1, Atp6ap1 - atpase, h+ transporting, lysosomal accessory protein 1, Myh9 - myosin, heavy chain 9, non-muscle, Atp13a3 - atpase type 13a3, Atp6v0c - atpase, h+ transporting, lysosomal v0 subunit c, Abcb6 - atp-binding cass…
GO:0016820	hydrolase activity, acting on acid anhydrides, catalyzing transmembrane movement of substances	3.72e-06	0.00014	2.1	6963	51	1950	30	[Atp13a2 - atpase type 13a2, Tap2 - transporter 2, atp-binding cassette, sub-family b (mdr/tap), Atp8a1 - atpase, aminophospholipid transporter (aplt), class i, type 8a, member 1, Atp6ap1 - atpase, h+ transporting, lysosomal accessory protein 1, Myh9 - myosin, heavy chain 9, non-muscle, Atp13a3 - atpase type 13a3, Atp6v0c - atpase, h+ transporting, lysosomal v0 subunit c, Abcb6 - atp-binding cass…
GO:0005254	chloride channel activity	6.03e-06	0.000224	2.57	6963	25	1950	18	[Clcn4 - chloride channel 4, Ano4 - anoctamin 4, Clcn3 - chloride channel 3, Clcn7 - chloride channel 7, Clic4 - chloride intracellular channel 4, Ttyh3 - tweety homolog 3 (drosophila), Clcn2 - chloride channel 2, Gabrb2 - gamma-aminobutyric acid (gaba) a receptor, beta 2, Gabrd - gamma-aminobutyric acid (gaba) a receptor, delta, Glrb - glycine receptor, beta, Gabra1 - gamma-aminobutyric acid (ga…
GO:0050839	cell adhesion molecule binding	6.28e-06	0.00023	2.26	6963	38	1950	24	[Fgfr1 - fibroblast growth factor receptor 1, Ptprd - protein tyrosine phosphatase, receptor type, d, Pvrl1 - poliovirus receptor-related 1, Itga7 - integrin, alpha 7, Lphn1 - latrophilin 1, P2rx4 - purinergic receptor p2x, ligand-gated ion channel 4, Ezr - ezrin, Ptprm - protein tyrosine phosphatase, receptor type, m, Cdh13 - cadherin 13, Grin2b - glutamate receptor, ionotropic, n-methyl d-aspar…
GO:0015399	primary active transmembrane transporter activity	8.78e-06	0.000318	2.01	6963	55	1950	31	[Atp13a2 - atpase type 13a2, Tap2 - transporter 2, atp-binding cassette, sub-family b (mdr/tap), Atp8a1 - atpase, aminophospholipid transporter (aplt), class i, type 8a, member 1, Atp6ap1 - atpase, h+ transporting, lysosomal accessory protein 1, Tomm20 - translocase of outer mitochondrial membrane 20 homolog (yeast), Myh9 - myosin, heavy chain 9, non-muscle, Atp13a3 - atpase type 13a3, Atp6v0c - …
GO:0015405	P-P-bond-hydrolysis-driven transmembrane transporter activity	8.78e-06	0.000314	2.01	6963	55	1950	31	[Atp13a2 - atpase type 13a2, Tap2 - transporter 2, atp-binding cassette, sub-family b (mdr/tap), Atp8a1 - atpase, aminophospholipid transporter (aplt), class i, type 8a, member 1, Atp6ap1 - atpase, h+ transporting, lysosomal accessory protein 1, Tomm20 - translocase of outer mitochondrial membrane 20 homolog (yeast), Myh9 - myosin, heavy chain 9, non-muscle, Atp13a3 - atpase type 13a3, Atp6v0c - …
GO:0005539	glycosaminoglycan binding	9.81e-06	0.000346	2.08	6963	48	1950	28	[Col23a1 - collagen, type xxiii, alpha 1, Apoe - apolipoprotein e, Col5a1 - collagen, type v, alpha 1, Nell1 - nel-like 1 (chicken), Nell2 - nel-like 2 (chicken), Apoa5 - apolipoprotein a-v, Fstl1 - follistatin-like 1, Crispld2 - cysteine-rich secretory protein lccl domain containing 2, Ncan - neurocan, Pcsk6 - proprotein convertase subtilisin/kexin type 6, Gns - glucosamine (n-acetyl)-6-sulfatas…
GO:0015370	solute:sodium symporter activity	1.45e-05	0.000504	2.9	6963	16	1950	13	[Slc23a2 - solute carrier family 23 (nucleobase transporters), member 2, Slc32a1 - solute carrier family 32 (gaba vesicular transporter), member 1, Slc6a13 - solute carrier family 6 (neurotransmitter transporter, gaba), member 13, Slc6a11 - solute carrier family 6 (neurotransmitter transporter, gaba), member 11, Slc1a2 - solute carrier family 1 (glial high affinity glutamate transporter), member …
GO:0050840	extracellular matrix binding	3.52e-05	0.00121	3.02	6963	13	1950	11	[Itga6 - integrin, alpha 6, Shh - sonic hedgehog, Adam9 - adam metallopeptidase domain 9, Itgb1 - integrin, beta 1, Sparc - secreted protein, acidic, cysteine-rich (osteonectin), Itga7 - integrin, alpha 7, Spock2 - sparc/osteonectin, cwcv and kazal-like domains proteoglycan 2, Itga3 - integrin, alpha 3, Rpsa - ribosomal protein sa, Nid1 - nidogen 1, Sdc1 - syndecan 1]
GO:0004553	hydrolase activity, hydrolyzing O-glycosyl compounds	4.71e-05	0.0016	2.23	6963	32	1950	20	[Fuca2 - fucosidase, alpha-l- 2, plasma, Fuca1 - fucosidase, alpha-l- 1, tissue, Gla - galactosidase, alpha, Man2b1 - mannosidase, alpha, class 2b, member 1, Chid1 - chitinase domain containing 1, Man1a2 - mannosidase, alpha, class 1a, member 2, Acer3 - alkaline ceramidase 3, Hexb - hexosaminidase b, Agl - amylo-alpha-1, 6-glucosidase, 4-alpha-glucanotransferase, Engase - endo-beta-n-acetylglucos…
GO:0008233	peptidase activity	5.06e-05	0.0017	1.46	6963	201	1950	82	[Prepl - prolyl endopeptidase-like, Ctsb - cathepsin b, Scpep1 - serine carboxypeptidase 1, Spcs1 - signal peptidase complex subunit 1 homolog (s. cerevisiae), Ncstn - nicastrin, Adam9 - adam metallopeptidase domain 9, Mme - membrane metallo-endopeptidase, Adam10 - adam metallopeptidase domain 10, Dpp8 - dipeptidylpeptidase 8, Ctss - cathepsin s, Spcs3 - signal peptidase complex subunit 3 homolog…
GO:0005253	anion channel activity	6.63e-05	0.0022	2.3	6963	28	1950	18	[Clcn4 - chloride channel 4, Ano4 - anoctamin 4, Clcn3 - chloride channel 3, Clcn7 - chloride channel 7, Clic4 - chloride intracellular channel 4, Clcn2 - chloride channel 2, Ttyh3 - tweety homolog 3 (drosophila), Gabrb2 - gamma-aminobutyric acid (gaba) a receptor, beta 2, Gabrd - gamma-aminobutyric acid (gaba) a receptor, delta, Glrb - glycine receptor, beta, Gabra1 - gamma-aminobutyric acid (ga…
GO:0070011	peptidase activity, acting on L-amino acid peptides	7.28e-05	0.00239	1.46	6963	188	1950	77	[Ctsb - cathepsin b, Prepl - prolyl endopeptidase-like, Scpep1 - serine carboxypeptidase 1, Ncstn - nicastrin, Adam9 - adam metallopeptidase domain 9, Mme - membrane metallo-endopeptidase, Adam10 - adam metallopeptidase domain 10, Dpp8 - dipeptidylpeptidase 8, Ctss - cathepsin s, Cpe - carboxypeptidase e, Usp30 - ubiquitin specific peptidase 30, Plat - plasminogen activator, tissue, Psma4 - prote…
GO:0004222	metalloendopeptidase activity	8.83e-05	0.00286	2.16	6963	33	1950	20	[Adam11 - adam metallopeptidase domain 11, Pitrm1 - pitrilysin metallopeptidase 1, Adam9 - adam metallopeptidase domain 9, Adam10 - adam metallopeptidase domain 10, Mme - membrane metallo-endopeptidase, Ece2 - endothelin-converting enzyme 2, Adam12 - adam metallopeptidase domain 12, Adam19 - adam metallopeptidase domain 19, Adam15 - a disintegrin and metallopeptidase domain 15 (metargidin), Mmp14…
GO:0019955	cytokine binding	0.000123	0.00392	2.81	6963	14	1950	11	[Il10ra - interleukin 10 receptor, alpha, Il1rapl1 - interleukin 1 receptor accessory protein-like 1, Il6st - interleukin 6 signal transducer, A2m - alpha-2-macroglobulin, Tgfbr1 - transforming growth factor, beta receptor 1, Kit - v-kit hardy-zuckerman 4 feline sarcoma viral oncogene homolog, Il1rap - interleukin 1 receptor accessory protein, Acvr1 - activin a receptor, type i, Lifr - leukemia i…
GO:0008556	potassium-transporting ATPase activity	0.000134	0.00424	3.57	6963	7	1950	7	[Myh9 - myosin, heavy chain 9, non-muscle, Atp1b3 - atpase, na+/k+ transporting, beta 3 polypeptide, Atp1a3 - atpase, na+/k+ transporting, alpha 3 polypeptide, Atp1b2 - atpase, na+/k+ transporting, beta 2 polypeptide, Atp1a1 - atpase, na+/k+ transporting, alpha 1 polypeptide, Atp1a2 - atpase, na+/k+ transporting, alpha 2 polypeptide, Atp1b1 - atpase, na+/k+ transporting, beta 1 polypeptide]
GO:0005391	sodium:potassium-exchanging ATPase activity	0.000134	0.00419	3.57	6963	7	1950	7	[Atp1b3 - atpase, na+/k+ transporting, beta 3 polypeptide, Myh9 - myosin, heavy chain 9, non-muscle, Atp1a3 - atpase, na+/k+ transporting, alpha 3 polypeptide, Atp1b2 - atpase, na+/k+ transporting, beta 2 polypeptide, Atp1a1 - atpase, na+/k+ transporting, alpha 1 polypeptide, Atp1a2 - atpase, na+/k+ transporting, alpha 2 polypeptide, Atp1b1 - atpase, na+/k+ transporting, beta 1 polypeptide]
GO:0001664	G-protein coupled receptor binding	0.000136	0.0042	1.76	6963	69	1950	34	[Adrbk1 - adrenergic, beta, receptor kinase 1, Arhgef12 - rho guanine nucleotide exchange factor (gef) 12, Creb3 - camp responsive element binding protein 3, Gal - galanin prepropeptide, Reep1 - receptor accessory protein 1, Nsg2 - neuron specific gene family member 2, Shank1 - sh3 and multiple ankyrin repeat domains 1, Gnaz - guanine nucleotide binding protein (g protein), alpha z polypeptide, M…
GO:0016798	hydrolase activity, acting on glycosyl bonds	0.000219	0.00669	2.03	6963	37	1950	21	[Fuca2 - fucosidase, alpha-l- 2, plasma, Fuca1 - fucosidase, alpha-l- 1, tissue, Gla - galactosidase, alpha, Adprh - adp-ribosylarginine hydrolase, Man2b1 - mannosidase, alpha, class 2b, member 1, Chid1 - chitinase domain containing 1, Man1a2 - mannosidase, alpha, class 1a, member 2, Acer3 - alkaline ceramidase 3, Hexb - hexosaminidase b, Agl - amylo-alpha-1, 6-glucosidase, 4-alpha-glucanotransfe…
GO:0008201	heparin binding	0.000219	0.00662	2.03	6963	37	1950	21	[Col23a1 - collagen, type xxiii, alpha 1, Apoe - apolipoprotein e, Fgfr1 - fibroblast growth factor receptor 1, Col5a1 - collagen, type v, alpha 1, Serpine2 - serpin peptidase inhibitor, clade e, member 2, Nell1 - nel-like 1 (chicken), Nell2 - nel-like 2 (chicken), App - amyloid beta (a4) precursor protein, Hsd17b12 - hydroxysteroid (17-beta) dehydrogenase 12, Apoa5 - apolipoprotein a-v, Fstl1 - …
GO:0015662	ATPase activity, coupled to transmembrane movement of ions, phosphorylative mechanism	0.000252	0.00755	2.38	6963	21	1950	14	[Atp1a3 - atpase, na+/k+ transporting, alpha 3 polypeptide, Atp2b1 - atpase, ca++ transporting, plasma membrane 1, Atp1b2 - atpase, na+/k+ transporting, beta 2 polypeptide, Atp2b3 - atpase, ca++ transporting, plasma membrane 3, Atp1a1 - atpase, na+/k+ transporting, alpha 1 polypeptide, Atp2a2 - atpase, ca++ transporting, cardiac muscle, slow twitch 2, Atp1a2 - atpase, na+/k+ transporting, alpha 2…
GO:0043236	laminin binding	0.000253	0.00751	3.17	6963	9	1950	8	[Itga6 - integrin, alpha 6, Shh - sonic hedgehog, Adam9 - adam metallopeptidase domain 9, Itgb1 - integrin, beta 1, Itga7 - integrin, alpha 7, Itga3 - integrin, alpha 3, Rpsa - ribosomal protein sa, Nid1 - nidogen 1]
GO:0032403	protein complex binding	0.000311	0.00913	1.36	6963	250	1950	95	[Ctsb - cathepsin b, Adcy2 - adenylate cyclase 2 (brain), Vwf - von willebrand factor, Adam9 - adam metallopeptidase domain 9, Syp - synaptophysin, Synm - synemin, intermediate filament protein, Thra - thyroid hormone receptor alpha, Smc3 - structural maintenance of chromosomes 3, Ywhab - tyrosine 3-monooxygenase/tryptophan 5-monooxygenase activation protein, beta polypeptide, Ppap2b - phosphatid…
GO:0008375	acetylglucosaminyltransferase activity	0.000343	0.00995	2.62	6963	15	1950	11	[Pomgnt1 - protein o-linked mannose beta1,2-n-acetylglucosaminyltransferase, Pigc - phosphatidylinositol glycan anchor biosynthesis, class c, B3gnt5 - udp-glcnac:betagal beta-1,3-n-acetylglucosaminyltransferase 5, B3gnt1 - udp-glcnac:betagal beta-1,3-n-acetylglucosaminyltransferase 1, Extl2 - exostoses (multiple)-like 2, Mgat1 - mannosyl (alpha-1,3-)-glycoprotein beta-1,2-n-acetylglucosaminyltran…
GO:0035254	glutamate receptor binding	0.00043	0.0123	2.23	6963	24	1950	15	[Canx - calnexin, Shank1 - sh3 and multiple ankyrin repeat domains 1, Grin2b - glutamate receptor, ionotropic, n-methyl d-aspartate 2b, Grin2a - glutamate receptor, ionotropic, n-methyl d-aspartate 2a, Atp2b2 - atpase, ca++ transporting, plasma membrane 2, Shank2 - sh3 and multiple ankyrin repeat domains 2, Dlg1 - discs, large homolog 1 (drosophila), Cabp1 - calcium binding protein 1, Dlg4 - disc…
GO:0005267	potassium channel activity	0.000458	0.013	1.92	6963	41	1950	22	[Kcnd2 - potassium voltage-gated channel, shal-related subfamily, member 2, Kcnk15 - potassium channel, subfamily k, member 15, Kcna6 - potassium voltage gated channel, shaker related subfamily, member 6, Kcnk1 - potassium channel, subfamily k, member 1, Abcc8 - atp-binding cassette, subfamily c (cftr/mrp), member 8, Kcnma1 - potassium large conductance calcium-activated channel, subfamily m, alp…
GO:0004576	oligosaccharyl transferase activity	0.00048	0.0135	3.57	6963	6	1950	6	[Ddost - dolichyl-diphosphooligosaccharide-protein glycosyltransferase, Tusc3 - tumor suppressor candidate 3, Rpn2 - ribophorin ii, Dad1 - defender against cell death 1, Stt3a - stt3, subunit of the oligosaccharyltransferase complex, homolog a (s. cerevisiae), Stt3b - stt3, subunit of the oligosaccharyltransferase complex, homolog b (s. cerevisiae)]
GO:0004579	dolichyl-diphosphooligosaccharide-protein glycotransferase activity	0.00048	0.0134	3.57	6963	6	1950	6	[Ddost - dolichyl-diphosphooligosaccharide-protein glycosyltransferase, Tusc3 - tumor suppressor candidate 3, Rpn2 - ribophorin ii, Dad1 - defender against cell death 1, Stt3a - stt3, subunit of the oligosaccharyltransferase complex, homolog a (s. cerevisiae), Stt3b - stt3, subunit of the oligosaccharyltransferase complex, homolog b (s. cerevisiae)]
GO:0015385	sodium:hydrogen antiporter activity	0.00048	0.0132	3.57	6963	6	1950	6	[Slc9a7 - solute carrier family 9 (sodium/hydrogen exchanger), member 7, Slc9a3 - solute carrier family 9 (sodium/hydrogen exchanger), member 3, Slc9a5 - solute carrier family 9 (sodium/hydrogen exchanger), member 5, Slc9a8 - solute carrier family 9 (sodium/hydrogen exchanger), member 8, Slc9a1 - solute carrier family 9 (sodium/hydrogen exchanger), member 1, Slc9a6 - solute carrier family 9 (sodi…
GO:0016864	intramolecular oxidoreductase activity, transposing S-S bonds	0.00048	0.0131	3.57	6963	6	1950	6	[Ero1lb - ero1-like beta (s. cerevisiae), P4hb - prolyl 4-hydroxylase, beta polypeptide, Erp44 - endoplasmic reticulum protein 44, Pdia4 - protein disulfide isomerase family a, member 4, Pdia3 - protein disulfide isomerase family a, member 3, Ero1l - ero1-like (s. cerevisiae)]
GO:0005451	monovalent cation:hydrogen antiporter activity	0.00048	0.013	3.57	6963	6	1950	6	[Slc9a7 - solute carrier family 9 (sodium/hydrogen exchanger), member 7, Slc9a3 - solute carrier family 9 (sodium/hydrogen exchanger), member 3, Slc9a5 - solute carrier family 9 (sodium/hydrogen exchanger), member 5, Slc9a8 - solute carrier family 9 (sodium/hydrogen exchanger), member 8, Slc9a1 - solute carrier family 9 (sodium/hydrogen exchanger), member 1, Slc9a6 - solute carrier family 9 (sodi…
GO:0003756	protein disulfide isomerase activity	0.00048	0.0128	3.57	6963	6	1950	6	[P4hb - prolyl 4-hydroxylase, beta polypeptide, Ero1lb - ero1-like beta (s. cerevisiae), Erp44 - endoplasmic reticulum protein 44, Pdia3 - protein disulfide isomerase family a, member 3, Pdia4 - protein disulfide isomerase family a, member 4, Ero1l - ero1-like (s. cerevisiae)]
GO:0017147	Wnt-protein binding	0.00048	0.0127	3.57	6963	6	1950	6	[Wls - wntless homolog (drosophila), Lrp6 - low density lipoprotein receptor-related protein 6, Smo - smoothened, frizzled family receptor, Fzd1 - frizzled family receptor 1, Fzd4 - frizzled family receptor 4, Ryk - receptor-like tyrosine kinase]
GO:0031402	sodium ion binding	0.00048	0.0126	3.57	6963	6	1950	6	[Slc24a2 - solute carrier family 24 (sodium/potassium/calcium exchanger), member 2, Scn3a - sodium channel, voltage-gated, type iii, alpha, Scn1a - sodium channel, voltage-gated, type i, alpha, Atp1a1 - atpase, na+/k+ transporting, alpha 1 polypeptide, Scn2a1 - sodium channel, voltage-gated, type ii, alpha 1, Scn8a - sodium channel, voltage gated, type viii, alpha subunit]
GO:1901681	sulfur compound binding	0.000554	0.0144	1.75	6963	57	1950	28	[Col23a1 - collagen, type xxiii, alpha 1, Apoe - apolipoprotein e, Col5a1 - collagen, type v, alpha 1, Ogdhl - oxoglutarate dehydrogenase-like, Gpc4 - glypican 4, Nell1 - nel-like 1 (chicken), Nell2 - nel-like 2 (chicken), Tkt - transketolase, Fstl1 - follistatin-like 1, Apoa5 - apolipoprotein a-v, Crispld2 - cysteine-rich secretory protein lccl domain containing 2, Gns - glucosamine (n-acetyl)-6…
GO:0005246	calcium channel regulator activity	0.000715	0.0184	2.38	6963	18	1950	12	[Stim2 - stromal interaction molecule 2, Cacna2d2 - calcium channel, voltage-dependent, alpha 2/delta subunit 2, Nrxn1 - neurexin 1, Cacna2d3 - calcium channel, voltage-dependent, alpha2/delta subunit 3, Nrxn2 - neurexin 2, Cacng2 - calcium channel, voltage-dependent, gamma subunit 2, Grm3 - glutamate receptor, metabotropic 3, Calm1 - calmodulin 1, Gria2 - glutamate receptor, ionotropic, ampa 2, …
GO:0004896	cytokine receptor activity	0.00081	0.0207	3.12	6963	8	1950	7	[Il10ra - interleukin 10 receptor, alpha, Il6st - interleukin 6 signal transducer, Il13ra1 - interleukin 13 receptor, alpha 1, Il1rap - interleukin 1 receptor accessory protein, Ifnar1 - interferon (alpha, beta and omega) receptor 1, Lifr - leukemia inhibitory factor receptor alpha, Flt3 - fms-related tyrosine kinase 3]
GO:0015299	solute:hydrogen antiporter activity	0.00081	0.0205	3.12	6963	8	1950	7	[Slc9a7 - solute carrier family 9 (sodium/hydrogen exchanger), member 7, Tmco3 - transmembrane and coiled-coil domains 3, Slc9a3 - solute carrier family 9 (sodium/hydrogen exchanger), member 3, Slc9a5 - solute carrier family 9 (sodium/hydrogen exchanger), member 5, Slc9a8 - solute carrier family 9 (sodium/hydrogen exchanger), member 8, Slc9a1 - solute carrier family 9 (sodium/hydrogen exchanger),…
GO:0005518	collagen binding	0.000819	0.0206	2.45	6963	16	1950	11	[Vwf - von willebrand factor, Pdgfa - platelet-derived growth factor alpha polypeptide, Adam9 - adam metallopeptidase domain 9, Itgb1 - integrin, beta 1, Ap1g1 - adaptor-related protein complex 1, gamma 1 subunit, Ddr1 - discoidin domain receptor tyrosine kinase 1, Rell2 - relt-like 2, Itga3 - integrin, alpha 3, Nid1 - nidogen 1, Map1a - microtubule-associated protein 1a, Hsd17b12 - hydroxysteroi…
GO:0097110	scaffold protein binding	0.000912	0.0227	2.55	6963	14	1950	10	[Grid2 - glutamate receptor, ionotropic, delta 2, Cacna1g - calcium channel, voltage-dependent, t type, alpha 1g subunit, Dlg4 - discs, large homolog 4 (drosophila), Panx1 - pannexin 1, Shank1 - sh3 and multiple ankyrin repeat domains 1, Grin2a - glutamate receptor, ionotropic, n-methyl d-aspartate 2a, Shank3 - sh3 and multiple ankyrin repeat domains 3, Map2k2 - mitogen activated protein kinase k…
GO:0008376	acetylgalactosaminyltransferase activity	0.000954	0.0235	2.86	6963	10	1950	8	[Galnt2 - udp-n-acetyl-alpha-d-galactosamine:polypeptide n-acetylgalactosaminyltransferase 2 (galnac-t2), Extl2 - exostoses (multiple)-like 2, B4galnt4 - beta-1,4-n-acetyl-galactosaminyl transferase 4, B4galnt1 - beta-1,4-n-acetyl-galactosaminyl transferase 1, Galnt11 - udp-n-acetyl-alpha-d-galactosamine:polypeptide n-acetylgalactosaminyltransferase 11 (galnac-t11), Galnt7 - udp-n-acetyl-alpha-d-…
GO:0005343	organic acid:sodium symporter activity	0.000954	0.0233	2.86	6963	10	1950	8	[Slc1a6 - solute carrier family 1 (high affinity aspartate/glutamate transporter), member 6, Slc1a4 - solute carrier family 1 (glutamate/neutral amino acid transporter), member 4, Slc6a13 - solute carrier family 6 (neurotransmitter transporter, gaba), member 13, Slc6a11 - solute carrier family 6 (neurotransmitter transporter, gaba), member 11, Slc1a2 - solute carrier family 1 (glial high affinity…

## Sheet: cellular component
GO Term	Description	P-value	FDR q-value	Enrichment	N	B	n	b	Genes
GO:0031224	intrinsic to membrane	2.9e-189	3.2e-186	2.32	6963	1178	1950	764	[Hmgcr - 3-hydroxy-3-methylglutaryl-coa reductase, Glce - glucuronic acid epimerase, Bai3 - brain-specific angiogenesis inhibitor 3, Clcn4 - chloride channel 4, Ddr1 - discoidin domain receptor tyrosine kinase 1, Creb3 - camp responsive element binding protein 3, Gpr158 - g protein-coupled receptor 158, Grm8 - glutamate receptor, metabotropic 8, Acp2 - acid phosphatase 2, lysosomal, Slc4a4 - solu…
GO:0044425	membrane part	1.3e-185	7.12e-183	1.99	6963	1778	1950	989	[Clcn4 - chloride channel 4, Creb3 - camp responsive element binding protein 3, Gpr158 - g protein-coupled receptor 158, Grm8 - glutamate receptor, metabotropic 8, Acp2 - acid phosphatase 2, lysosomal, Slc6a13 - solute carrier family 6 (neurotransmitter transporter, gaba), member 13, Adcyap1r1 - adenylate cyclase activating polypeptide 1 receptor 1, Tmem57 - transmembrane protein 57, B3gnt2 - udp…
GO:0016021	integral to membrane	1.27e-183	4.65e-181	2.32	6963	1141	1950	742	[Glce - glucuronic acid epimerase, Hmgcr - 3-hydroxy-3-methylglutaryl-coa reductase, Clcn4 - chloride channel 4, Bai3 - brain-specific angiogenesis inhibitor 3, Creb3 - camp responsive element binding protein 3, Ddr1 - discoidin domain receptor tyrosine kinase 1, Gpr158 - g protein-coupled receptor 158, Grm8 - glutamate receptor, metabotropic 8, Acp2 - acid phosphatase 2, lysosomal, Slc4a4 - solu…
GO:0016020	membrane	8.19e-72	2.25e-69	1.57	6963	1939	1950	851	[Clcn4 - chloride channel 4, Acadm - acyl-coa dehydrogenase, c-4 to c-12 straight chain, Creb3 - camp responsive element binding protein 3, Gpr158 - g protein-coupled receptor 158, Grm8 - glutamate receptor, metabotropic 8, Acp2 - acid phosphatase 2, lysosomal, Adcyap1r1 - adenylate cyclase activating polypeptide 1 receptor 1, Tmem57 - transmembrane protein 57, Epha7 - eph receptor a7, Adra2b - a…
GO:0044432	endoplasmic reticulum part	2.29e-52	5.03e-50	2.43	6963	321	1950	218	[Hmgcr - 3-hydroxy-3-methylglutaryl-coa reductase, Ero1lb - ero1-like beta (s. cerevisiae), Lman1 - lectin, mannose-binding, 1, Creb3 - camp responsive element binding protein 3, Cyba - cytochrome b-245, alpha polypeptide, Tmco1 - transmembrane and coiled-coil domains 1, Pomt1 - protein-o-mannosyltransferase 1, Pitpnm1 - phosphatidylinositol transfer protein, membrane-associated 1, Hm13 - histoco…
GO:0044459	plasma membrane part	8.37e-50	1.54e-47	2.06	6963	521	1950	301	[Vwf - von willebrand factor, Ncstn - nicastrin, Ddr1 - discoidin domain receptor tyrosine kinase 1, Grm8 - glutamate receptor, metabotropic 8, Grid2 - glutamate receptor, ionotropic, delta 2, Slc4a4 - solute carrier family 4, sodium bicarbonate cotransporter, member 4, Gpc4 - glypican 4, Slc6a13 - solute carrier family 6 (neurotransmitter transporter, gaba), member 13, Adcyap1r1 - adenylate cycl…
GO:0005783	endoplasmic reticulum	7.34e-37	1.15e-34	2.11	6963	363	1950	214	[Hmgcr - 3-hydroxy-3-methylglutaryl-coa reductase, Vwf - von willebrand factor, Ncstn - nicastrin, Lman1 - lectin, mannose-binding, 1, Creb3 - camp responsive element binding protein 3, Plcb4 - phospholipase c, beta 4, Reep1 - receptor accessory protein 1, Phtf1 - putative homeodomain transcription factor 1, Adcyap1r1 - adenylate cyclase activating polypeptide 1 receptor 1, Tmem43 - transmembrane…
GO:0005886	plasma membrane	8.63e-32	1.19e-29	1.59	6963	952	1950	423	[Bai3 - brain-specific angiogenesis inhibitor 3, Ddr1 - discoidin domain receptor tyrosine kinase 1, Gpr158 - g protein-coupled receptor 158, Fmnl1 - formin-like 1, Adra2b - adrenergic, alpha-2b-, receptor, Maged1 - melanoma antigen, family d, 1, Adcy1 - adenylate cyclase 1 (brain), Cald1 - caldesmon 1, Htr5a - 5-hydroxytryptamine (serotonin) receptor 5a, Apc - adenomatous polyposis coli, Dscam -…
GO:0005789	endoplasmic reticulum membrane	3.05e-31	3.72e-29	2.31	6963	224	1950	145	[Ero1lb - ero1-like beta (s. cerevisiae), Hmgcr - 3-hydroxy-3-methylglutaryl-coa reductase, Cdipt - cdp-diacylglycerol--inositol 3-phosphatidyltransferase, Lman1 - lectin, mannose-binding, 1, Creb3 - camp responsive element binding protein 3, Mlec - malectin, Rtn3 - reticulon 3, Ppap2b - phosphatidic acid phosphatase type 2b, Tmx1 - thioredoxin-related transmembrane protein 1, Atl1 - atlastin gtp…
GO:0031226	intrinsic to plasma membrane	3.99e-27	4.39e-25	2.76	6963	110	1950	85	[Slc23a2 - solute carrier family 23 (nucleobase transporters), member 2, Nf1 - neurofibromin 1, Kcnd2 - potassium voltage-gated channel, shal-related subfamily, member 2, Ncstn - nicastrin, Adam9 - adam metallopeptidase domain 9, Slc39a14 - solute carrier family 39 (zinc transporter), member 14, Grm8 - glutamate receptor, metabotropic 8, Bmpr2 - bone morphogenetic protein receptor, type ii (serin…
GO:0005887	integral to plasma membrane	2.79e-25	2.79e-23	2.86	6963	91	1950	73	[Slc23a2 - solute carrier family 23 (nucleobase transporters), member 2, Kcnd2 - potassium voltage-gated channel, shal-related subfamily, member 2, Ncstn - nicastrin, Slc39a14 - solute carrier family 39 (zinc transporter), member 14, Bmpr2 - bone morphogenetic protein receptor, type ii (serine/threonine kinase), Grm8 - glutamate receptor, metabotropic 8, Slc4a4 - solute carrier family 4, sodium b…
GO:0097458	neuron part	3.21e-25	2.94e-23	1.72	6963	532	1950	257	[Creb3 - camp responsive element binding protein 3, Acadm - acyl-coa dehydrogenase, c-4 to c-12 straight chain, Sdc3 - syndecan 3, Grm8 - glutamate receptor, metabotropic 8, P2rx4 - purinergic receptor p2x, ligand-gated ion channel 4, Plcb4 - phospholipase c, beta 4, Grid2 - glutamate receptor, ionotropic, delta 2, Acp2 - acid phosphatase 2, lysosomal, Cpe - carboxypeptidase e, Adcyap1r1 - adenyl…
GO:0043005	neuron projection	7.2e-25	6.09e-23	1.79	6963	451	1950	226	[Acadm - acyl-coa dehydrogenase, c-4 to c-12 straight chain, Sdc3 - syndecan 3, Grm8 - glutamate receptor, metabotropic 8, Plcb4 - phospholipase c, beta 4, P2rx4 - purinergic receptor p2x, ligand-gated ion channel 4, Grid2 - glutamate receptor, ionotropic, delta 2, Acp2 - acid phosphatase 2, lysosomal, Cpe - carboxypeptidase e, Adcyap1r1 - adenylate cyclase activating polypeptide 1 receptor 1, Tm…
GO:0031090	organelle membrane	1.82e-22	1.43e-20	1.5	6963	905	1950	380	[Ero1lb - ero1-like beta (s. cerevisiae), Hmgcr - 3-hydroxy-3-methylglutaryl-coa reductase, Ncstn - nicastrin, Lman1 - lectin, mannose-binding, 1, Clcn4 - chloride channel 4, Acadm - acyl-coa dehydrogenase, c-4 to c-12 straight chain, Creb3 - camp responsive element binding protein 3, Acp2 - acid phosphatase 2, lysosomal, Sv2c - synaptic vesicle glycoprotein 2c, Adcyap1r1 - adenylate cyclase acti…
GO:0009986	cell surface	7.76e-22	5.69e-20	2.4	6963	137	1950	92	[Ctsb - cathepsin b, Col23a1 - collagen, type xxiii, alpha 1, Kcnd2 - potassium voltage-gated channel, shal-related subfamily, member 2, Adam9 - adam metallopeptidase domain 9, Adam10 - adam metallopeptidase domain 10, Mmp25 - matrix metalloproteinase 25, Bmpr2 - bone morphogenetic protein receptor, type ii (serine/threonine kinase), Ctss - cathepsin s, Adcyap1r1 - adenylate cyclase activating po…
GO:0044456	synapse part	1.11e-21	7.62e-20	2	6963	253	1950	142	[Nf1 - neurofibromin 1, Adam10 - adam metallopeptidase domain 10, Mme - membrane metallo-endopeptidase, Grm8 - glutamate receptor, metabotropic 8, Grid2 - glutamate receptor, ionotropic, delta 2, Plcb4 - phospholipase c, beta 4, P2rx4 - purinergic receptor p2x, ligand-gated ion channel 4, Sv2c - synaptic vesicle glycoprotein 2c, Cpe - carboxypeptidase e, Srcin1 - src kinase signaling inhibitor 1,…
GO:0044463	cell projection part	6.15e-20	3.98e-18	1.74	6963	404	1950	197	[Adam10 - adam metallopeptidase domain 10, Grid2 - glutamate receptor, ionotropic, delta 2, Plcb4 - phospholipase c, beta 4, P2rx4 - purinergic receptor p2x, ligand-gated ion channel 4, Tmem57 - transmembrane protein 57, Ptprj - protein tyrosine phosphatase, receptor type, j, Ntrk2 - neurotrophic tyrosine kinase, receptor, type 2, Cald1 - caldesmon 1, Exoc4 - exocyst complex component 4, Sema4c -…
GO:0042995	cell projection	1.13e-18	6.92e-17	1.55	6963	640	1950	278	[Acadm - acyl-coa dehydrogenase, c-4 to c-12 straight chain, Sdc3 - syndecan 3, Grm8 - glutamate receptor, metabotropic 8, Grid2 - glutamate receptor, ionotropic, delta 2, P2rx4 - purinergic receptor p2x, ligand-gated ion channel 4, Plcb4 - phospholipase c, beta 4, Acp2 - acid phosphatase 2, lysosomal, Adcyap1r1 - adenylate cyclase activating polypeptide 1 receptor 1, Cpe - carboxypeptidase e, Sl…
GO:0045202	synapse	1.91e-18	1.11e-16	2.08	6963	185	1950	108	[Mme - membrane metallo-endopeptidase, Grid2 - glutamate receptor, ionotropic, delta 2, P2rx4 - purinergic receptor p2x, ligand-gated ion channel 4, Srcin1 - src kinase signaling inhibitor 1, Pdzrn3 - pdz domain containing ring finger 3, Cbln1 - cerebellin 1 precursor, Magi2 - membrane associated guanylate kinase, ww and pdz domain containing 2, Epha7 - eph receptor a7, Plat - plasminogen activat…
GO:0030054	cell junction	2.16e-18	1.19e-16	1.77	6963	347	1950	172	[Cdc42bpb - cdc42 binding protein kinase beta (dmpk-like), P2rx4 - purinergic receptor p2x, ligand-gated ion channel 4, Grid2 - glutamate receptor, ionotropic, delta 2, Sv2c - synaptic vesicle glycoprotein 2c, Vezt - vezatin, adherens junctions transmembrane protein, Adcyap1r1 - adenylate cyclase activating polypeptide 1 receptor 1, Srcin1 - src kinase signaling inhibitor 1, Cbln1 - cerebellin 1 …
GO:0097060	synaptic membrane	1.24e-15	6.48e-14	2.21	6963	126	1950	78	[Grip2 - glutamate receptor interacting protein 2, Syp - synaptophysin, Grid2 - glutamate receptor, ionotropic, delta 2, Grm8 - glutamate receptor, metabotropic 8, Cpe - carboxypeptidase e, Srcin1 - src kinase signaling inhibitor 1, Slc1a2 - solute carrier family 1 (glial high affinity glutamate transporter), member 2, Nptn - neuroplastin, Epha7 - eph receptor a7, Lrrtm4 - leucine rich repeat tra…
GO:0044421	extracellular region part	1.48e-15	7.4e-14	1.89	6963	223	1950	118	[Ctsb - cathepsin b, A2m - alpha-2-macroglobulin, Vwf - von willebrand factor, Rell2 - relt-like 2, Gpc4 - glypican 4, Cpe - carboxypeptidase e, C1qtnf1 - c1q and tumor necrosis factor related protein 1, Apoa5 - apolipoprotein a-v, Plat - plasminogen activator, tissue, Actb - actin, beta, Olfm3 - olfactomedin 3, Serpine2 - serpin peptidase inhibitor, clade e, member 2, Cd47 - cd47 molecule, Vldlr…
GO:0034702	ion channel complex	2.45e-15	1.17e-13	2.62	6963	71	1950	52	[Kcnd2 - potassium voltage-gated channel, shal-related subfamily, member 2, Ano4 - anoctamin 4, Kcnc3 - potassium voltage gated channel, shaw-related subfamily, member 3, Catsper2 - cation channel, sperm associated 2, Cntn2 - contactin 2 (axonal), Ttyh1 - tweety homolog 1 (drosophila), Ryr2 - ryanodine receptor 2, cardiac, Cacna2d2 - calcium channel, voltage-dependent, alpha 2/delta subunit 2, Sc…
GO:0030424	axon	2.53e-15	1.16e-13	2.13	6963	141	1950	84	[Adrbk1 - adrenergic, beta, receptor kinase 1, Nf1 - neurofibromin 1, Canx - calnexin, Mme - membrane metallo-endopeptidase, Acadm - acyl-coa dehydrogenase, c-4 to c-12 straight chain, Mapt - microtubule-associated protein tau, Sdc3 - syndecan 3, P2rx4 - purinergic receptor p2x, ligand-gated ion channel 4, Gad1 - glutamate decarboxylase 1, Zfyve27 - zinc finger, fyve domain containing 27, Srcin1 …
GO:0005615	extracellular space	4.01e-15	1.76e-13	2.06	6963	156	1950	90	[Ctsb - cathepsin b, Col23a1 - collagen, type xxiii, alpha 1, A2m - alpha-2-macroglobulin, Adam9 - adam metallopeptidase domain 9, Psap - prosaposin, Lrp8 - low density lipoprotein receptor-related protein 8, apolipoprotein e receptor, Cpe - carboxypeptidase e, C1qtnf1 - c1q and tumor necrosis factor related protein 1, Apoa5 - apolipoprotein a-v, Plat - plasminogen activator, tissue, Pcsk6 - prop…
GO:0005576	extracellular region	4.05e-15	1.71e-13	2.26	6963	112	1950	71	[Ctsb - cathepsin b, Vwf - von willebrand factor, Scpep1 - serine carboxypeptidase 1, Fam3c - family with sequence similarity 3, member c, Gal - galanin prepropeptide, Cpe - carboxypeptidase e, Galnt1 - udp-n-acetyl-alpha-d-galactosamine:polypeptide n-acetylgalactosaminyltransferase 1 (galnac-t1), Cbln1 - cerebellin 1 precursor, Fstl1 - follistatin-like 1, Apoa5 - apolipoprotein a-v, Ncan - neuro…
GO:0044444	cytoplasmic part	5.43e-15	2.21e-13	1.17	6963	3016	1950	989	[Clcn4 - chloride channel 4, Acadm - acyl-coa dehydrogenase, c-4 to c-12 straight chain, Creb3 - camp responsive element binding protein 3, Acp2 - acid phosphatase 2, lysosomal, Adcyap1r1 - adenylate cyclase activating polypeptide 1 receptor 1, Tial1 - tia1 cytotoxic granule-associated rna binding protein-like 1, B3gnt2 - udp-glcnac:betagal beta-1,3-n-acetylglucosaminyltransferase 2, Atp6v0b - at…
GO:0030425	dendrite	9.83e-15	3.86e-13	1.93	6963	192	1950	104	[Nf1 - neurofibromin 1, Mme - membrane metallo-endopeptidase, Bmpr2 - bone morphogenetic protein receptor, type ii (serine/threonine kinase), Plcb4 - phospholipase c, beta 4, P2rx4 - purinergic receptor p2x, ligand-gated ion channel 4, Cpe - carboxypeptidase e, Srcin1 - src kinase signaling inhibitor 1, Epha7 - eph receptor a7, Ephb2 - eph receptor b2, Epha5 - epha5, Ntrk2 - neurotrophic tyrosine…
GO:0033267	axon part	4.82e-13	1.83e-11	2.18	6963	108	1950	66	[Aatk - apoptosis-associated tyrosine kinase, Mapt - microtubule-associated protein tau, Gad1 - glutamate decarboxylase 1, P2rx4 - purinergic receptor p2x, ligand-gated ion channel 4, Lrp8 - low density lipoprotein receptor-related protein 8, apolipoprotein e receptor, Kif5a - kinesin family member 5a, Kcnc3 - potassium voltage gated channel, shaw-related subfamily, member 3, Slc1a2 - solute carr…
GO:0045121	membrane raft	1.63e-12	5.98e-11	2.14	6963	110	1950	66	[Adrbk1 - adrenergic, beta, receptor kinase 1, Ctsb - cathepsin b, Adcy2 - adenylate cyclase 2 (brain), Pikfyve - phosphoinositide kinase, fyve finger containing, Adcy5 - adenylate cyclase 5, Bmpr2 - bone morphogenetic protein receptor, type ii (serine/threonine kinase), Lrp8 - low density lipoprotein receptor-related protein 8, apolipoprotein e receptor, Cpe - carboxypeptidase e, Adcyap1r1 - ade…
GO:0045211	postsynaptic membrane	1.65e-12	5.85e-11	2.24	6963	94	1950	59	[Grip2 - glutamate receptor interacting protein 2, Grm8 - glutamate receptor, metabotropic 8, Grid2 - glutamate receptor, ionotropic, delta 2, Srcin1 - src kinase signaling inhibitor 1, Lrrtm4 - leucine rich repeat transmembrane neuronal 4, Epha7 - eph receptor a7, Nptn - neuroplastin, Odz2 - odz, odd oz/ten-m homolog 2 (drosophila), Ntrk2 - neurotrophic tyrosine kinase, receptor, type 2, Dlg1 - …
GO:0034703	cation channel complex	2.27e-12	7.82e-11	2.68	6963	52	1950	39	[Scn4b - sodium channel, voltage-gated, type iv, beta, Kcnd2 - potassium voltage-gated channel, shal-related subfamily, member 2, Cacnb3 - calcium channel, voltage-dependent, beta 3 subunit, Kcna6 - potassium voltage gated channel, shaker related subfamily, member 6, Cacna1g - calcium channel, voltage-dependent, t type, alpha 1g subunit, Kcng4 - potassium voltage-gated channel, subfamily g, membe…
GO:0005788	endoplasmic reticulum lumen	3e-12	9.99e-11	3.12	6963	32	1950	28	[Foxred2 - fad-dependent oxidoreductase domain containing 2, Erap1 - endoplasmic reticulum aminopeptidase 1, Sil1 - sil1 homolog, endoplasmic reticulum chaperone (s. cerevisiae), Dnajb11 - dnaj (hsp40) homolog, subfamily b, member 11, Tor2a - torsin family 2, member a, Calu - calumenin, Ppib - peptidylprolyl isomerase b, Os9 - osteosarcoma amplified 9, Hyou1 - hypoxia up-regulated 1, P4hb - proly…
GO:0030176	integral to endoplasmic reticulum membrane	4.7e-12	1.52e-10	3.05	6963	34	1950	29	[Spcs1 - signal peptidase complex subunit 1 homolog (s. cerevisiae), Creb3 - camp responsive element binding protein 3, Tap2 - transporter 2, atp-binding cassette, sub-family b (mdr/tap), Sppl2b - signal peptide peptidase-like 2b, Sppl2a - signal peptide peptidase-like 2a, Dolpp1 - dolichyl pyrophosphate phosphatase 1, Ankle2 - ankyrin repeat and lem domain containing 2, Rhbdd1 - rhomboid domain …
GO:0009897	external side of plasma membrane	6.19e-12	1.94e-10	2.66	6963	51	1950	38	[Ctsb - cathepsin b, Vwf - von willebrand factor, Itga6 - integrin, alpha 6, Astn1 - astrotactin 1, Gpc4 - glypican 4, Atp6ap2 - atpase, h+ transporting, lysosomal accessory protein 2, Cdh13 - cadherin 13, Itgav - integrin, alpha v, S1pr1 - sphingosine-1-phosphate receptor 1, Aqp4 - aquaporin 4, Sdc1 - syndecan 1, Epha5 - epha5, Sema7a - semaphorin 7a, gpi membrane anchor, Tmem123 - transmembrane…
GO:0043235	receptor complex	1.13e-11	3.46e-10	2.43	6963	66	1950	45	[Itga6 - integrin, alpha 6, Itga7 - integrin, alpha 7, Stxbp5 - syntaxin binding protein 5 (tomosyn), Grid2 - glutamate receptor, ionotropic, delta 2, Abhd6 - abhydrolase domain containing 6, Plxnb1 - plexin b1, Itgav - integrin, alpha v, Shank1 - sh3 and multiple ankyrin repeat domains 1, Lrrtm4 - leucine rich repeat transmembrane neuronal 4, Sorbs1 - sorbin and sh3 domain containing 1, Myh9 - m…
GO:0043025	neuronal cell body	1.95e-11	5.79e-10	1.73	6963	229	1950	111	[Creb3 - camp responsive element binding protein 3, P2rx4 - purinergic receptor p2x, ligand-gated ion channel 4, Grm8 - glutamate receptor, metabotropic 8, Bmpr2 - bone morphogenetic protein receptor, type ii (serine/threonine kinase), Cpe - carboxypeptidase e, Srcin1 - src kinase signaling inhibitor 1, Acsl4 - acyl-coa synthetase long-chain family member 4, Epha7 - eph receptor a7, Ephb2 - eph r…
GO:0031982	vesicle	7.7e-11	2.23e-09	1.51	6963	419	1950	177	[Ctsb - cathepsin b, A2m - alpha-2-macroglobulin, Vwf - von willebrand factor, Tmem35 - transmembrane protein 35, Ncstn - nicastrin, Mme - membrane metallo-endopeptidase, Adam10 - adam metallopeptidase domain 10, Acp2 - acid phosphatase 2, lysosomal, Ywhab - tyrosine 3-monooxygenase/tryptophan 5-monooxygenase activation protein, beta polypeptide, Sv2c - synaptic vesicle glycoprotein 2c, Vezt - ve…
GO:0031227	intrinsic to endoplasmic reticulum membrane	8.99e-11	2.53e-09	2.82	6963	38	1950	30	[Spcs1 - signal peptidase complex subunit 1 homolog (s. cerevisiae), Creb3 - camp responsive element binding protein 3, Tap2 - transporter 2, atp-binding cassette, sub-family b (mdr/tap), Sppl2b - signal peptide peptidase-like 2b, Sppl2a - signal peptide peptidase-like 2a, Dolpp1 - dolichyl pyrophosphate phosphatase 1, Ankle2 - ankyrin repeat and lem domain containing 2, Rhbdd1 - rhomboid domain …
GO:0031410	cytoplasmic vesicle	1.06e-10	2.9e-09	1.54	6963	374	1950	161	[Ctsb - cathepsin b, Vwf - von willebrand factor, Ncstn - nicastrin, Tmem35 - transmembrane protein 35, Adam10 - adam metallopeptidase domain 10, Mme - membrane metallo-endopeptidase, Acp2 - acid phosphatase 2, lysosomal, Ywhab - tyrosine 3-monooxygenase/tryptophan 5-monooxygenase activation protein, beta polypeptide, Sv2c - synaptic vesicle glycoprotein 2c, Cpe - carboxypeptidase e, Vezt - vezat…
GO:0005794	Golgi apparatus	1.22e-10	3.27e-09	1.52	6963	389	1950	166	[Glce - glucuronic acid epimerase, Arhgap21 - rho gtpase activating protein 21, Ncstn - nicastrin, Lman1 - lectin, mannose-binding, 1, Adam10 - adam metallopeptidase domain 10, Creb3 - camp responsive element binding protein 3, Arf3 - adp-ribosylation factor 3, Copg - coatomer protein complex, subunit gamma, Cpe - carboxypeptidase e, Galnt1 - udp-n-acetyl-alpha-d-galactosamine:polypeptide n-acety…
GO:0008328	ionotropic glutamate receptor complex	1.79e-10	4.69e-09	2.92	6963	33	1950	27	[Grid2 - glutamate receptor, ionotropic, delta 2, Abhd6 - abhydrolase domain containing 6, Shank1 - sh3 and multiple ankyrin repeat domains 1, Lrrtm4 - leucine rich repeat transmembrane neuronal 4, Shank2 - sh3 and multiple ankyrin repeat domains 2, Grik4 - glutamate receptor, ionotropic, kainate 4, Grin1 - glutamate receptor, ionotropic, n-methyl d-aspartate 1, Olfm3 - olfactomedin 3, Cacng2 - c…
GO:0016023	cytoplasmic membrane-bounded vesicle	1.89e-10	4.84e-09	1.57	6963	322	1950	142	[Ctsb - cathepsin b, Vwf - von willebrand factor, Ncstn - nicastrin, Tmem35 - transmembrane protein 35, Adam10 - adam metallopeptidase domain 10, Mme - membrane metallo-endopeptidase, Ywhab - tyrosine 3-monooxygenase/tryptophan 5-monooxygenase activation protein, beta polypeptide, Sv2c - synaptic vesicle glycoprotein 2c, Cpe - carboxypeptidase e, Vezt - vezatin, adherens junctions transmembrane p…
GO:0044297	cell body	1.91e-10	4.79e-09	1.65	6963	255	1950	118	[Creb3 - camp responsive element binding protein 3, P2rx4 - purinergic receptor p2x, ligand-gated ion channel 4, Grm8 - glutamate receptor, metabotropic 8, Bmpr2 - bone morphogenetic protein receptor, type ii (serine/threonine kinase), Atp6ap2 - atpase, h+ transporting, lysosomal accessory protein 2, Cpe - carboxypeptidase e, Srcin1 - src kinase signaling inhibitor 1, Acsl4 - acyl-coa synthetase …
GO:0044309	neuron spine	2.02e-10	4.93e-09	2.28	6963	72	1950	46	[Ppp1r9b - protein phosphatase 1, regulatory subunit 9b, Adrbk1 - adrenergic, beta, receptor kinase 1, Kcnd2 - potassium voltage-gated channel, shal-related subfamily, member 2, Canx - calnexin, Sez6 - seizure related 6 homolog (mouse), Grid2 - glutamate receptor, ionotropic, delta 2, P2rx4 - purinergic receptor p2x, ligand-gated ion channel 4, Slc8a1 - solute carrier family 8 (sodium/calcium exc…
GO:0000139	Golgi membrane	2.68e-10	6.4e-09	1.79	6963	178	1950	89	[Cdipt - cdp-diacylglycerol--inositol 3-phosphatidyltransferase, Pomgnt1 - protein o-linked mannose beta1,2-n-acetylglucosaminyltransferase, Lman1 - lectin, mannose-binding, 1, B3gat1 - beta-1,3-glucuronyltransferase 1 (glucuronosyltransferase p), Glg1 - golgi glycoprotein 1, Creb3 - camp responsive element binding protein 3, Lpcat1 - lysophosphatidylcholine acyltransferase 1, Scamp5 - secretory …
GO:0031988	membrane-bounded vesicle	5.51e-10	1.29e-08	1.53	6963	349	1950	150	[Ctsb - cathepsin b, Vwf - von willebrand factor, A2m - alpha-2-macroglobulin, Ncstn - nicastrin, Tmem35 - transmembrane protein 35, Adam10 - adam metallopeptidase domain 10, Mme - membrane metallo-endopeptidase, Ywhab - tyrosine 3-monooxygenase/tryptophan 5-monooxygenase activation protein, beta polypeptide, Sv2c - synaptic vesicle glycoprotein 2c, Cpe - carboxypeptidase e, Vezt - vezatin, adher…
GO:0044431	Golgi apparatus part	2.02e-09	4.64e-08	1.64	6963	238	1950	109	[Cdipt - cdp-diacylglycerol--inositol 3-phosphatidyltransferase, Lman1 - lectin, mannose-binding, 1, Adam10 - adam metallopeptidase domain 10, Creb3 - camp responsive element binding protein 3, Copg - coatomer protein complex, subunit gamma, Rtn3 - reticulon 3, Adcyap1r1 - adenylate cyclase activating polypeptide 1 receptor 1, Galnt1 - udp-n-acetyl-alpha-d-galactosamine:polypeptide n-acetylgalact…
GO:0043197	dendritic spine	2.47e-09	5.55e-08	2.23	6963	69	1950	43	[Ppp1r9b - protein phosphatase 1, regulatory subunit 9b, Adrbk1 - adrenergic, beta, receptor kinase 1, Kcnd2 - potassium voltage-gated channel, shal-related subfamily, member 2, Canx - calnexin, Sez6 - seizure related 6 homolog (mouse), Grid2 - glutamate receptor, ionotropic, delta 2, P2rx4 - purinergic receptor p2x, ligand-gated ion channel 4, Slc8a1 - solute carrier family 8 (sodium/calcium exc…
GO:0005575	cellular_component	3.66e-09	8.04e-08	1.03	6963	6363	1950	1841	[A2m - alpha-2-macroglobulin, Acadm - acyl-coa dehydrogenase, c-4 to c-12 straight chain, Creb3 - camp responsive element binding protein 3, Zhx1 - zinc fingers and homeoboxes 1, Hopx - hop homeobox, Acp2 - acid phosphatase 2, lysosomal, Slc6a13 - solute carrier family 6 (neurotransmitter transporter, gaba), member 13, Adcyap1r1 - adenylate cyclase activating polypeptide 1 receptor 1, Tmem57 - tr…
GO:0014069	postsynaptic density	4.07e-09	8.78e-08	1.98	6963	103	1950	57	[Nf1 - neurofibromin 1, Kcnd2 - potassium voltage-gated channel, shal-related subfamily, member 2, Grip2 - glutamate receptor interacting protein 2, Adam10 - adam metallopeptidase domain 10, P2rx4 - purinergic receptor p2x, ligand-gated ion channel 4, Plcb4 - phospholipase c, beta 4, Grid2 - glutamate receptor, ionotropic, delta 2, Lrp8 - low density lipoprotein receptor-related protein 8, apolip…
GO:0031301	integral to organelle membrane	1.72e-08	3.65e-07	2.04	6963	84	1950	48	[Tmem163 - transmembrane protein 163, Spcs1 - signal peptidase complex subunit 1 homolog (s. cerevisiae), Syp - synaptophysin, Creb3 - camp responsive element binding protein 3, Tap2 - transporter 2, atp-binding cassette, sub-family b (mdr/tap), Sppl2b - signal peptide peptidase-like 2b, Dmpk - dystrophia myotonica-protein kinase, Sppl2a - signal peptide peptidase-like 2a, Dolpp1 - dolichyl pyrop…
GO:0031300	intrinsic to organelle membrane	1.88e-08	3.9e-07	2.01	6963	89	1950	50	[Spcs1 - signal peptidase complex subunit 1 homolog (s. cerevisiae), Creb3 - camp responsive element binding protein 3, Syp - synaptophysin, Tap2 - transporter 2, atp-binding cassette, sub-family b (mdr/tap), Dolpp1 - dolichyl pyrophosphate phosphatase 1, Steap2 - steap family member 2, metalloreductase, Lemd3 - lem domain containing 3, Rhbdd1 - rhomboid domain containing 1, Abcb6 - atp-binding c…
GO:0044420	extracellular matrix part	2.94e-08	5.99e-07	2.41	6963	46	1950	31	[Col23a1 - collagen, type xxiii, alpha 1, Itga6 - integrin, alpha 6, Col5a1 - collagen, type v, alpha 1, Rell2 - relt-like 2, Ptprz1 - protein tyrosine phosphatase, receptor-type, z polypeptide 1, Smc3 - structural maintenance of chromosomes 3, Col4a2 - collagen, type iv, alpha 2, C1qtnf5 - c1q and tumor necrosis factor related protein 5, Slc1a3 - solute carrier family 1 (glial high affinity glut…
GO:0032589	neuron projection membrane	1.74e-07	3.49e-06	3.04	6963	20	1950	17	[Robo2 - roundabout homolog 2 (drosophila), Atp2b1 - atpase, ca++ transporting, plasma membrane 1, Gabarapl1 - gaba(a) receptor-associated protein like 1, Slc12a5 - solute carrier family 12 (potassium-chloride transporter), member 5, Palm - paralemmin, Atf4 - activating transcription factor 4 (tax-responsive enhancer element b67), Slc1a2 - solute carrier family 1 (glial high affinity glutamate tr…
GO:0042734	presynaptic membrane	1.98e-07	3.89e-06	2.38	6963	42	1950	28	[Syp - synaptophysin, Grm8 - glutamate receptor, metabotropic 8, Slc1a2 - solute carrier family 1 (glial high affinity glutamate transporter), member 2, Nptn - neuroplastin, Dlg1 - discs, large homolog 1 (drosophila), Grik4 - glutamate receptor, ionotropic, kainate 4, Sept3 - septin 3, L1cam - l1 cell adhesion molecule, Adora1 - adenosine a1 receptor, Gabbr1 - gamma-aminobutyric acid (gaba) b rec…
GO:0042383	sarcolemma	5.45e-07	1.05e-05	2.38	6963	39	1950	26	[Ctsb - cathepsin b, Fkrp - fukutin related protein, Dmd - dystrophin, Adcy5 - adenylate cyclase 5, Slc8a1 - solute carrier family 8 (sodium/calcium exchanger), member 1, Adcy6 - adenylate cyclase 6, Aqp4 - aquaporin 4, Kcnj11 - potassium inwardly rectifying channel, subfamily j, member 11, Itgb1 - integrin, beta 1, Ank1 - ankyrin 1, erythrocytic, Dst - dystonin, Bsg - basigin, Ptk2 - ptk2 protei…
GO:0012506	vesicle membrane	6.7e-07	1.27e-05	1.74	6963	123	1950	60	[Syt2 - synaptotagmin ii, Appbp2 - amyloid beta precursor protein (cytoplasmic tail) binding protein 2, Pikfyve - phosphoinositide kinase, fyve finger containing, Syp - synaptophysin, Scamp5 - secretory carrier membrane protein 5, Appl1 - adaptor protein, phosphotyrosine interaction, ph domain and leucine zipper containing 1, Sv2c - synaptic vesicle glycoprotein 2c, Cpe - carboxypeptidase e, Pi4k…
GO:0031012	extracellular matrix	7.65e-07	1.43e-05	2.08	6963	60	1950	35	[Vwf - von willebrand factor, Igf1 - insulin-like growth factor 1, Glg1 - golgi glycoprotein 1, Col5a1 - collagen, type v, alpha 1, Rell2 - relt-like 2, Gpc4 - glypican 4, Ptprz1 - protein tyrosine phosphatase, receptor-type, z polypeptide 1, Col4a2 - collagen, type iv, alpha 2, Rpsa - ribosomal protein sa, Crispld2 - cysteine-rich secretory protein lccl domain containing 2, Col18a1 - collagen, t…
GO:0030136	clathrin-coated vesicle	8.37e-07	1.53e-05	1.82	6963	100	1950	51	[Syt2 - synaptotagmin ii, Vwf - von willebrand factor, Syp - synaptophysin, Mme - membrane metallo-endopeptidase, Scamp5 - secretory carrier membrane protein 5, Syngr3 - synaptogyrin 3, Sv2c - synaptic vesicle glycoprotein 2c, Lgi3 - leucine-rich repeat lgi family, member 3, Syt7 - synaptotagmin vii, Steap2 - steap family member 2, metalloreductase, Syt11 - synaptotagmin xi, Grin1 - glutamate rec…
GO:0016323	basolateral plasma membrane	8.6e-07	1.55e-05	2.03	6963	65	1950	37	[Adrbk1 - adrenergic, beta, receptor kinase 1, Slc23a2 - solute carrier family 23 (nucleobase transporters), member 2, Itga6 - integrin, alpha 6, Adam9 - adam metallopeptidase domain 9, Ddr1 - discoidin domain receptor tyrosine kinase 1, Slc4a4 - solute carrier family 4, sodium bicarbonate cotransporter, member 4, Slc12a6 - solute carrier family 12, member 6, Slc8a1 - solute carrier family 8 (sod…
GO:0042470	melanosome	1.15e-06	2.04e-05	2.1	6963	56	1950	33	[Ctsb - cathepsin b, Canx - calnexin, Ncstn - nicastrin, Ywhab - tyrosine 3-monooxygenase/tryptophan 5-monooxygenase activation protein, beta polypeptide, Calu - calumenin, Tmed10 - transmembrane emp24-like trafficking protein 10 (yeast), Ppib - peptidylprolyl isomerase b, Ggh - gamma-glutamyl hydrolase (conjugase, folylpolygammaglutamyl hydrolase), P4hb - prolyl 4-hydroxylase, beta polypeptide, …
GO:0048770	pigment granule	1.15e-06	2.01e-05	2.1	6963	56	1950	33	[Ctsb - cathepsin b, Canx - calnexin, Ncstn - nicastrin, Ywhab - tyrosine 3-monooxygenase/tryptophan 5-monooxygenase activation protein, beta polypeptide, Calu - calumenin, Tmed10 - transmembrane emp24-like trafficking protein 10 (yeast), Ppib - peptidylprolyl isomerase b, Ggh - gamma-glutamyl hydrolase (conjugase, folylpolygammaglutamyl hydrolase), P4hb - prolyl 4-hydroxylase, beta polypeptide, …
GO:0031256	leading edge membrane	1.41e-06	2.42e-05	2.12	6963	54	1950	32	[Ppp1r9b - protein phosphatase 1, regulatory subunit 9b, Akt2 - v-akt murine thymoma viral oncogene homolog 2, Clasp2 - cytoplasmic linker associated protein 2, Pip5k1c - phosphatidylinositol-4-phosphate 5-kinase, type i, gamma, Slc1a2 - solute carrier family 1 (glial high affinity glutamate transporter), member 2, Kcnc3 - potassium voltage gated channel, shaw-related subfamily, member 3, Ptprj -…
GO:0030426	growth cone	1.52e-06	2.57e-05	1.9	6963	81	1950	43	[Aatk - apoptosis-associated tyrosine kinase, Mapt - microtubule-associated protein tau, Tmod2 - tropomodulin 2, Tnk2 - tyrosine kinase, non-receptor, 2, Shank2 - sh3 and multiple ankyrin repeat domains 2, Ntrk2 - neurotrophic tyrosine kinase, receptor, type 2, Odz2 - odz, odd oz/ten-m homolog 2 (drosophila), Map1b - microtubule-associated protein 1b, Exoc4 - exocyst complex component 4, Pafah1b1…
GO:0005773	vacuole	1.65e-06	2.75e-05	1.77	6963	107	1950	53	[Ctsb - cathepsin b, Psap - prosaposin, Fuca1 - fucosidase, alpha-l- 1, tissue, Ctss - cathepsin s, Acp2 - acid phosphatase 2, lysosomal, Arsb - arylsulfatase b, Fgfr3 - fibroblast growth factor receptor 3, Hexb - hexosaminidase b, Syt7 - synaptotagmin vii, Vma21 - vma21 vacuolar h+-atpase homolog (s. cerevisiae), Ppt2 - palmitoyl-protein thioesterase 2, March8 - membrane-associated ring finger (…
GO:0031253	cell projection membrane	1.78e-06	2.92e-05	1.85	6963	89	1950	46	[Ppp1r9b - protein phosphatase 1, regulatory subunit 9b, Pip5k1c - phosphatidylinositol-4-phosphate 5-kinase, type i, gamma, Clasp2 - cytoplasmic linker associated protein 2, Akt2 - v-akt murine thymoma viral oncogene homolog 2, Myo10 - myosin x, Adcy6 - adenylate cyclase 6, Slc1a2 - solute carrier family 1 (glial high affinity glutamate transporter), member 2, Kcnc3 - potassium voltage gated cha…
GO:0044437	vacuolar part	1.92e-06	3.1e-05	1.93	6963	74	1950	40	[Scarb2 - scavenger receptor class b, member 2, Ncstn - nicastrin, Tmem106b - transmembrane protein 106b, Acp2 - acid phosphatase 2, lysosomal, Sppl2b - signal peptide peptidase-like 2b, Clcn7 - chloride channel 7, Mcoln1 - mucolipin 1, Vps39 - vacuolar protein sorting 39 homolog (s. cerevisiae), Sppl2a - signal peptide peptidase-like 2a, Aktip - akt interacting protein, Atp6ap1 - atpase, h+ tran…
GO:0032281	alpha-amino-3-hydroxy-5-methyl-4-isoxazolepropionic acid selective glutamate receptor complex	1.97e-06	3.14e-05	2.86	6963	20	1950	16	[Abhd6 - abhydrolase domain containing 6, Shisa6 - shisa homolog 6 (xenopus laevis), Cacng7 - calcium channel, voltage-dependent, gamma subunit 7, Cpt1c - carnitine palmitoyltransferase 1c, Lrrtm4 - leucine rich repeat transmembrane neuronal 4, Cnih2 - cornichon homolog 2 (drosophila), Olfm1 - olfactomedin 1, Dlg4 - discs, large homolog 4 (drosophila), Cacng2 - calcium channel, voltage-dependent,…
GO:0030659	cytoplasmic vesicle membrane	2.13e-06	3.34e-05	1.74	6963	113	1950	55	[Syt2 - synaptotagmin ii, Appbp2 - amyloid beta precursor protein (cytoplasmic tail) binding protein 2, Syp - synaptophysin, Scamp5 - secretory carrier membrane protein 5, Sv2c - synaptic vesicle glycoprotein 2c, Cpe - carboxypeptidase e, Pi4ka - phosphatidylinositol 4-kinase, catalytic, alpha, Rab8a - rab8a, member ras oncogene family, Syt11 - synaptotagmin xi, Sema4c - sema domain, immunoglobul…
GO:0005604	basement membrane	2.19e-06	3.4e-05	2.55	6963	28	1950	20	[Timp2 - timp metallopeptidase inhibitor 2, Itga6 - integrin, alpha 6, Col5a1 - collagen, type v, alpha 1, Rell2 - relt-like 2, Fras1 - fraser syndrome 1, Col4a2 - collagen, type iv, alpha 2, Smc3 - structural maintenance of chromosomes 3, Lamc1 - laminin, gamma 1, Rpsa - ribosomal protein sa, Col4a1 - collagen, type iv, alpha 1, Col18a1 - collagen, type xviii, alpha 1, Itgb1 - integrin, beta 1, …
GO:0030427	site of polarized growth	2.34e-06	3.57e-05	1.87	6963	82	1950	43	[Aatk - apoptosis-associated tyrosine kinase, Mapt - microtubule-associated protein tau, Tmod2 - tropomodulin 2, Tnk2 - tyrosine kinase, non-receptor, 2, Shank2 - sh3 and multiple ankyrin repeat domains 2, Ntrk2 - neurotrophic tyrosine kinase, receptor, type 2, Odz2 - odz, odd oz/ten-m homolog 2 (drosophila), Map1b - microtubule-associated protein 1b, Exoc4 - exocyst complex component 4, Pafah1b1…
GO:0005774	vacuolar membrane	3.41e-06	5.13e-05	2.03	6963	58	1950	33	[Scarb2 - scavenger receptor class b, member 2, Ncstn - nicastrin, Tmem106b - transmembrane protein 106b, Acp2 - acid phosphatase 2, lysosomal, Sppl2b - signal peptide peptidase-like 2b, Clcn7 - chloride channel 7, Mcoln1 - mucolipin 1, Sppl2a - signal peptide peptidase-like 2a, Atp6ap1 - atpase, h+ transporting, lysosomal accessory protein 1, Dirc2 - disrupted in renal carcinoma 2, Slc36a1 - sol…
GO:0000323	lytic vacuole	3.94e-06	5.85e-05	1.81	6963	91	1950	46	[Ctsb - cathepsin b, Atp13a2 - atpase type 13a2, Psap - prosaposin, Fuca1 - fucosidase, alpha-l- 1, tissue, Ctss - cathepsin s, Acp2 - acid phosphatase 2, lysosomal, Man2b1 - mannosidase, alpha, class 2b, member 1, Arsb - arylsulfatase b, Nbr1 - neighbor of brca1 gene 1, Ggh - gamma-glutamyl hydrolase (conjugase, folylpolygammaglutamyl hydrolase), Fgfr3 - fibroblast growth factor receptor 3, Hexb…
GO:0005764	lysosome	3.94e-06	5.77e-05	1.81	6963	91	1950	46	[Ctsb - cathepsin b, Atp13a2 - atpase type 13a2, Psap - prosaposin, Fuca1 - fucosidase, alpha-l- 1, tissue, Ctss - cathepsin s, Acp2 - acid phosphatase 2, lysosomal, Man2b1 - mannosidase, alpha, class 2b, member 1, Arsb - arylsulfatase b, Nbr1 - neighbor of brca1 gene 1, Ggh - gamma-glutamyl hydrolase (conjugase, folylpolygammaglutamyl hydrolase), Hexb - hexosaminidase b, Fgfr3 - fibroblast growt…
GO:0016324	apical plasma membrane	4.47e-06	6.47e-05	1.85	6963	81	1950	42	[Ctsb - cathepsin b, Slc23a2 - solute carrier family 23 (nucleobase transporters), member 2, Adrbk1 - adrenergic, beta, receptor kinase 1, Cldnd1 - claudin domain containing 1, Cacnb3 - calcium channel, voltage-dependent, beta 3 subunit, Clcn3 - chloride channel 3, Bmpr2 - bone morphogenetic protein receptor, type ii (serine/threonine kinase), Slc30a5 - solute carrier family 30 (zinc transporter)…
GO:0043195	terminal bouton	5.68e-06	8.11e-05	2.51	6963	27	1950	19	[Grm4 - glutamate receptor, metabotropic 4, P2rx4 - purinergic receptor p2x, ligand-gated ion channel 4, Kcnma1 - potassium large conductance calcium-activated channel, subfamily m, alpha member 1, Grin2b - glutamate receptor, ionotropic, n-methyl d-aspartate 2b, Grin2a - glutamate receptor, ionotropic, n-methyl d-aspartate 2a, Ap3d1 - adaptor-related protein complex 3, delta 1 subunit, Ntrk2 - n…
GO:0030135	coated vesicle	6.66e-06	9.4e-05	1.7	6963	111	1950	53	[Syt2 - synaptotagmin ii, Vwf - von willebrand factor, Syp - synaptophysin, Mme - membrane metallo-endopeptidase, Scamp5 - secretory carrier membrane protein 5, Syngr3 - synaptogyrin 3, Sv2c - synaptic vesicle glycoprotein 2c, Lgi3 - leucine-rich repeat lgi family, member 3, Syt7 - synaptotagmin vii, Steap2 - steap family member 2, metalloreductase, Syt11 - synaptotagmin xi, Grin1 - glutamate rec…
GO:0005765	lysosomal membrane	8.23e-06	0.000115	2.16	6963	43	1950	26	[Scarb2 - scavenger receptor class b, member 2, Ncstn - nicastrin, Tmem106b - transmembrane protein 106b, Acp2 - acid phosphatase 2, lysosomal, Sppl2b - signal peptide peptidase-like 2b, Clcn7 - chloride channel 7, Mcoln1 - mucolipin 1, Sppl2a - signal peptide peptidase-like 2a, Dirc2 - disrupted in renal carcinoma 2, Slc36a1 - solute carrier family 36 (proton/amino acid symporter), member 1, Slc…
GO:0005911	cell-cell junction	8.89e-06	0.000122	1.64	6963	131	1950	60	[Cdc42bpb - cdc42 binding protein kinase beta (dmpk-like), Mtdh - metadherin, Adcyap1r1 - adenylate cyclase activating polypeptide 1 receptor 1, Magi2 - membrane associated guanylate kinase, ww and pdz domain containing 2, Sorbs1 - sorbin and sh3 domain containing 1, Ptprj - protein tyrosine phosphatase, receptor type, j, Odz2 - odz, odd oz/ten-m homolog 2 (drosophila), Dlg1 - discs, large homolo…
GO:0044433	cytoplasmic vesicle part	1.43e-05	0.000194	1.6	6963	141	1950	63	[Syt2 - synaptotagmin ii, Appbp2 - amyloid beta precursor protein (cytoplasmic tail) binding protein 2, Syp - synaptophysin, Scamp5 - secretory carrier membrane protein 5, Copg - coatomer protein complex, subunit gamma, Sv2c - synaptic vesicle glycoprotein 2c, Cpe - carboxypeptidase e, Pi4ka - phosphatidylinositol 4-kinase, catalytic, alpha, Rab8a - rab8a, member ras oncogene family, Vma21 - vma2…
GO:0008021	synaptic vesicle	1.46e-05	0.000196	1.89	6963	66	1950	35	[Syt2 - synaptotagmin ii, Syp - synaptophysin, Mme - membrane metallo-endopeptidase, Scamp5 - secretory carrier membrane protein 5, Stxbp5 - syntaxin binding protein 5 (tomosyn), Slc32a1 - solute carrier family 32 (gaba vesicular transporter), member 1, Syngr3 - synaptogyrin 3, Sv2c - synaptic vesicle glycoprotein 2c, Lgi3 - leucine-rich repeat lgi family, member 3, Syt7 - synaptotagmin vii, Ppt1…
GO:0031225	anchored to membrane	1.57e-05	0.000208	2.53	6963	24	1950	17	[Lypd1 - ly6/plaur domain containing 1, Negr1 - neuronal growth regulator 1, Prnp - prion protein, Cd59 - cd59 molecule, complement regulatory protein, Cntn1 - contactin 1, Rtn4rl1 - reticulon 4 receptor-like 1, Gpc4 - glypican 4, Lsamp - limbic system-associated membrane protein, Thy1 - thy-1 cell surface antigen, Cntn6 - contactin 6, Bcan - brevican, Cntn2 - contactin 2 (axonal), Cntn3 - contac…
GO:0008076	voltage-gated potassium channel complex	1.66e-05	0.000217	2.6	6963	22	1950	16	[Kcnd2 - potassium voltage-gated channel, shal-related subfamily, member 2, Kcna6 - potassium voltage gated channel, shaker related subfamily, member 6, Abcc8 - atp-binding cassette, subfamily c (cftr/mrp), member 8, Kcnma1 - potassium large conductance calcium-activated channel, subfamily m, alpha member 1, Kcna1 - potassium voltage-gated channel, shaker-related subfamily, member 1, Dpp6 - dipep…
GO:0033268	node of Ranvier	2.4e-05	0.00031	3.25	6963	11	1950	10	[Dlg1 - discs, large homolog 1 (drosophila), Kcnq2 - potassium voltage-gated channel, kqt-like subfamily, member 2, Cntn2 - contactin 2 (axonal), Scn1a - sodium channel, voltage-gated, type i, alpha, Nfasc - neurofascin, Ank3 - ankyrin 3, node of ranvier, Scn2a1 - sodium channel, voltage-gated, type ii, alpha 1, Scn1b - sodium channel, voltage-gated, type i, beta, Dag1 - dystroglycan 1 (dystrophi…
GO:0034706	sodium channel complex	3.74e-05	0.000479	3.57	6963	8	1950	8	[Scn4b - sodium channel, voltage-gated, type iv, beta, Scn4a - sodium channel, voltage-gated, type iv, alpha subunit, Scn3a - sodium channel, voltage-gated, type iii, alpha, Scn1a - sodium channel, voltage-gated, type i, alpha, Scn2b - sodium channel, voltage-gated, type ii, beta, Scn2a1 - sodium channel, voltage-gated, type ii, alpha 1, Scn1b - sodium channel, voltage-gated, type i, beta, Scn8a …
GO:0001518	voltage-gated sodium channel complex	3.74e-05	0.000473	3.57	6963	8	1950	8	[Scn4b - sodium channel, voltage-gated, type iv, beta, Scn4a - sodium channel, voltage-gated, type iv, alpha subunit, Scn3a - sodium channel, voltage-gated, type iii, alpha, Scn1a - sodium channel, voltage-gated, type i, alpha, Scn2b - sodium channel, voltage-gated, type ii, beta, Scn2a1 - sodium channel, voltage-gated, type ii, alpha 1, Scn1b - sodium channel, voltage-gated, type i, beta, Scn8a …
GO:0034705	potassium channel complex	4.04e-05	0.000505	2.48	6963	23	1950	16	[Kcnd2 - potassium voltage-gated channel, shal-related subfamily, member 2, Kcna6 - potassium voltage gated channel, shaker related subfamily, member 6, Abcc8 - atp-binding cassette, subfamily c (cftr/mrp), member 8, Kcnma1 - potassium large conductance calcium-activated channel, subfamily m, alpha member 1, Kcna1 - potassium voltage-gated channel, shaker-related subfamily, member 1, Dpp6 - dipep…
GO:0034704	calcium channel complex	4.37e-05	0.00054	2.55	6963	21	1950	15	[Cacna2d2 - calcium channel, voltage-dependent, alpha 2/delta subunit 2, Cacnb3 - calcium channel, voltage-dependent, beta 3 subunit, Cacna1g - calcium channel, voltage-dependent, t type, alpha 1g subunit, Cacna1e - calcium channel, voltage-dependent, r type, alpha 1e subunit, Cacna1i - calcium channel, voltage-dependent, t type, alpha 1i subunit, Catsper2 - cation channel, sperm associated 2, Ca…
GO:0060076	excitatory synapse	4.56e-05	0.000558	2.73	6963	17	1950	13	[Syp - synaptophysin, Slc17a7 - solute carrier family 17 (sodium-dependent inorganic phosphate cotransporter), member 7, Shank1 - sh3 and multiple ankyrin repeat domains 1, Nlgn1 - neuroligin 1, Ntrk2 - neurotrophic tyrosine kinase, receptor, type 2, Nlgn3 - neuroligin 3, Dlg4 - discs, large homolog 4 (drosophila), Grin1 - glutamate receptor, ionotropic, n-methyl d-aspartate 1, Rapgef4 - rap guan…
GO:0005901	caveola	5.92e-05	0.000716	2.12	6963	37	1950	22	[Adrbk1 - adrenergic, beta, receptor kinase 1, Ctsb - cathepsin b, Bmpr1a - bone morphogenetic protein receptor, type ia, Bmpr2 - bone morphogenetic protein receptor, type ii (serine/threonine kinase), Erbb4 - v-erb-a erythroblastic leukemia viral oncogene homolog 4 (avian), Slc27a1 - solute carrier family 27 (fatty acid transporter), member 1, Cdh13 - cadherin 13, Kcnma1 - potassium large conduc…
GO:0031594	neuromuscular junction	6.63e-05	0.000793	2.3	6963	28	1950	18	[Serpine2 - serpin peptidase inhibitor, clade e, member 2, Myh10 - myosin, heavy chain 10, non-muscle, Sv2a - synaptic vesicle glycoprotein 2a, Syngr3 - synaptogyrin 3, Pdzrn3 - pdz domain containing ring finger 3, Kcnc3 - potassium voltage gated channel, shaw-related subfamily, member 3, Prkaca - protein kinase, camp-dependent, catalytic, alpha, App - amyloid beta (a4) precursor protein, Epha7 -…
GO:0030315	T-tubule	0.000102	0.0012	2.43	6963	22	1950	15	[Ezr - ezrin, Slc8a1 - solute carrier family 8 (sodium/calcium exchanger), member 1, Atp1a1 - atpase, na+/k+ transporting, alpha 1 polypeptide, Atp1a2 - atpase, na+/k+ transporting, alpha 2 polypeptide, Scn2a1 - sodium channel, voltage-gated, type ii, alpha 1, Scn1b - sodium channel, voltage-gated, type i, beta, Aqp4 - aquaporin 4, Kcnj11 - potassium inwardly rectifying channel, subfamily j, memb…
GO:0030141	secretory granule	0.000105	0.00123	1.68	6963	87	1950	41	[Vwf - von willebrand factor, Akt2 - v-akt murine thymoma viral oncogene homolog 2, Gal - galanin prepropeptide, Stxbp5 - syntaxin binding protein 5 (tomosyn), Slc30a5 - solute carrier family 30 (zinc transporter), member 5, Pcsk2 - proprotein convertase subtilisin/kexin type 2, Chga - chromogranin a (parathyroid secretory protein 1), Chgb - chromogranin b (secretogranin 1), Cpe - carboxypeptidas…
GO:0032590	dendrite membrane	0.000107	0.00124	2.98	6963	12	1950	10	[Kcnc1 - potassium voltage gated channel, shaw-related subfamily, member 1, Grin1 - glutamate receptor, ionotropic, n-methyl d-aspartate 1, Atp2b1 - atpase, ca++ transporting, plasma membrane 1, Gabarapl1 - gaba(a) receptor-associated protein like 1, Atf4 - activating transcription factor 4 (tax-responsive enhancer element b67), Palm - paralemmin, Slc12a5 - solute carrier family 12 (potassium-chl…
GO:0030173	integral to Golgi membrane	0.000107	0.00123	2.98	6963	12	1950	10	[Rer1 - rer1 retention in endoplasmic reticulum 1 homolog (s. cerevisiae), St3gal5 - st3 beta-galactoside alpha-2,3-sialyltransferase 5, Cux1 - cut-like homeobox 1, St3gal3 - st3 beta-galactoside alpha-2,3-sialyltransferase 3, B4galnt1 - beta-1,4-n-acetyl-galactosaminyl transferase 1, St3gal2 - st3 beta-galactoside alpha-2,3-sialyltransferase 2, Acer3 - alkaline ceramidase 3, Sgms1 - sphingomyeli…
GO:0031228	intrinsic to Golgi membrane	0.000107	0.00122	2.98	6963	12	1950	10	[Rer1 - rer1 retention in endoplasmic reticulum 1 homolog (s. cerevisiae), St3gal5 - st3 beta-galactoside alpha-2,3-sialyltransferase 5, Cux1 - cut-like homeobox 1, B4galnt1 - beta-1,4-n-acetyl-galactosaminyl transferase 1, St3gal3 - st3 beta-galactoside alpha-2,3-sialyltransferase 3, Acer3 - alkaline ceramidase 3, St3gal2 - st3 beta-galactoside alpha-2,3-sialyltransferase 2, Sgms1 - sphingomyeli…
GO:0044295	axonal growth cone	0.000107	0.00121	2.98	6963	12	1950	10	[Apc - adenomatous polyposis coli, Mapk8ip1 - mitogen-activated protein kinase 8 interacting protein 1, Aatk - apoptosis-associated tyrosine kinase, Gpm6a - glycoprotein m6a, Mapt - microtubule-associated protein tau, Nrxn1 - neurexin 1, Smo - smoothened, frizzled family receptor, Ptch1 - patched 1, Epha4 - eph receptor a4, Boc - biregional cell adhesion molecule-related/down-regulated by oncogen…
GO:0005891	voltage-gated calcium channel complex	0.000123	0.00136	2.81	6963	14	1950	11	[Catsper2 - cation channel, sperm associated 2, Cacna2d2 - calcium channel, voltage-dependent, alpha 2/delta subunit 2, Cacnb3 - calcium channel, voltage-dependent, beta 3 subunit, Cacna1a - calcium channel, voltage-dependent, p/q type, alpha 1a subunit, Cacna1g - calcium channel, voltage-dependent, t type, alpha 1g subunit, Cacna2d3 - calcium channel, voltage-dependent, alpha2/delta subunit 3, C…
GO:0008305	integrin complex	0.000134	0.00147	3.57	6963	7	1950	7	[Myh9 - myosin, heavy chain 9, non-muscle, Itga6 - integrin, alpha 6, Itgb1 - integrin, beta 1, Itga7 - integrin, alpha 7, Itga3 - integrin, alpha 3, Itgav - integrin, alpha v, Lyn - v-yes-1 yamaguchi sarcoma viral related oncogene homolog]
GO:0044462	external encapsulating structure part	0.000134	0.00146	3.57	6963	7	1950	7	[Grid2 - glutamate receptor, ionotropic, delta 2, Grin1 - glutamate receptor, ionotropic, n-methyl d-aspartate 1, Grin2c - glutamate receptor, ionotropic, n-methyl d-aspartate 2c, Grin2b - glutamate receptor, ionotropic, n-methyl d-aspartate 2b, Grin2a - glutamate receptor, ionotropic, n-methyl d-aspartate 2a, Dag1 - dystroglycan 1 (dystrophin-associated glycoprotein 1), Gria1 - glutamate recepto…
GO:0005793	endoplasmic reticulum-Golgi intermediate compartment	0.000158	0.00171	2.1	6963	34	1950	20	[Lman1 - lectin, mannose-binding, 1, Tmed9 - transmembrane emp24 protein transport domain containing 9, Kdelr1 - kdel (lys-asp-glu-leu) endoplasmic reticulum protein retention receptor 1, Erp44 - endoplasmic reticulum protein 44, Tmed10 - transmembrane emp24-like trafficking protein 10 (yeast), Nucb1 - nucleobindin 1, Cln8 - ceroid-lipofuscinosis, neuronal 8 (epilepsy, progressive with mental ret…
GO:0030673	axolemma	0.000253	0.00271	3.17	6963	9	1950	8	[Kcnc1 - potassium voltage gated channel, shaw-related subfamily, member 1, Robo1 - roundabout homolog 1 (drosophila), Ank1 - ankyrin 1, erythrocytic, Robo2 - roundabout homolog 2 (drosophila), Adora1 - adenosine a1 receptor, Slc1a2 - solute carrier family 1 (glial high affinity glutamate transporter), member 2, Kcnc3 - potassium voltage gated channel, shaw-related subfamily, member 3, Gabbr1 - g…
GO:0030672	synaptic vesicle membrane	0.000339	0.00359	2.06	6963	33	1950	19	[Syt2 - synaptotagmin ii, Sv2b - synaptic vesicle glycoprotein 2b, Syp - synaptophysin, Abcc8 - atp-binding cassette, subfamily c (cftr/mrp), member 8, Scamp5 - secretory carrier membrane protein 5, Sv2a - synaptic vesicle glycoprotein 2a, Slc17a7 - solute carrier family 17 (sodium-dependent inorganic phosphate cotransporter), member 7, Sv2c - synaptic vesicle glycoprotein 2c, Slc2a3 - solute car…
GO:0005578	proteinaceous extracellular matrix	0.000339	0.00355	2.06	6963	33	1950	19	[Vwf - von willebrand factor, Igf1 - insulin-like growth factor 1, Spon1 - spondin 1, extracellular matrix protein, Ptprz1 - protein tyrosine phosphatase, receptor-type, z polypeptide 1, Gpc4 - glypican 4, Lamc1 - laminin, gamma 1, Sparc - secreted protein, acidic, cysteine-rich (osteonectin), Fn1 - fibronectin 1, Spock2 - sparc/osteonectin, cwcv and kazal-like domains proteoglycan 2, Adamts4 - a…
GO:0033116	endoplasmic reticulum-Golgi intermediate compartment membrane	0.000348	0.00361	2.75	6963	13	1950	10	[Vmp1 - vacuole membrane protein 1, Lman1 - lectin, mannose-binding, 1, Tmed9 - transmembrane emp24 protein transport domain containing 9, Tmed7 - transmembrane emp24 protein transport domain containing 7, Tmed10 - transmembrane emp24-like trafficking protein 10 (yeast), Tmed2 - transmembrane emp24 domain trafficking protein 2, Cln8 - ceroid-lipofuscinosis, neuronal 8 (epilepsy, progressive with …
GO:0043198	dendritic shaft	0.000361	0.00371	1.97	6963	38	1950	21	[Adrbk1 - adrenergic, beta, receptor kinase 1, Grip2 - glutamate receptor interacting protein 2, Grm4 - glutamate receptor, metabotropic 4, Sez6 - seizure related 6 homolog (mouse), Map2 - microtubule-associated protein 2, Slc8a1 - solute carrier family 8 (sodium/calcium exchanger), member 1, Fmr1 - fragile x mental retardation 1, Slc12a5 - solute carrier family 12 (potassium-chloride transporter…
GO:0030288	outer membrane-bounded periplasmic space	0.00048	0.00489	3.57	6963	6	1950	6	[Grid2 - glutamate receptor, ionotropic, delta 2, Grin1 - glutamate receptor, ionotropic, n-methyl d-aspartate 1, Grin2c - glutamate receptor, ionotropic, n-methyl d-aspartate 2c, Grin2b - glutamate receptor, ionotropic, n-methyl d-aspartate 2b, Grin2a - glutamate receptor, ionotropic, n-methyl d-aspartate 2a, Gria1 - glutamate receptor, ionotropic, ampa 1]
GO:0005890	sodium:potassium-exchanging ATPase complex	0.00048	0.00484	3.57	6963	6	1950	6	[Atp1b3 - atpase, na+/k+ transporting, beta 3 polypeptide, Atp1a3 - atpase, na+/k+ transporting, alpha 3 polypeptide, Atp1b2 - atpase, na+/k+ transporting, beta 2 polypeptide, Atp1a1 - atpase, na+/k+ transporting, alpha 1 polypeptide, Atp1a2 - atpase, na+/k+ transporting, alpha 2 polypeptide, Atp1b1 - atpase, na+/k+ transporting, beta 1 polypeptide]
GO:0042597	periplasmic space	0.00048	0.0048	3.57	6963	6	1950	6	[Grid2 - glutamate receptor, ionotropic, delta 2, Grin1 - glutamate receptor, ionotropic, n-methyl d-aspartate 1, Grin2c - glutamate receptor, ionotropic, n-methyl d-aspartate 2c, Grin2b - glutamate receptor, ionotropic, n-methyl d-aspartate 2b, Grin2a - glutamate receptor, ionotropic, n-methyl d-aspartate 2a, Gria1 - glutamate receptor, ionotropic, ampa 1]
GO:0035253	ciliary rootlet	0.00048	0.00475	3.57	6963	6	1950	6	[Kif5c - kinesin family member 5c, Psen1 - presenilin 1, Kif5b - kinesin family member 5b, Kif5a - kinesin family member 5a, App - amyloid beta (a4) precursor protein, Klc1 - kinesin light chain 1]
GO:0030662	coated vesicle membrane	0.000667	0.00655	1.82	6963	47	1950	24	[Syt2 - synaptotagmin ii, Sv2b - synaptic vesicle glycoprotein 2b, Syp - synaptophysin, Abcc8 - atp-binding cassette, subfamily c (cftr/mrp), member 8, Scamp5 - secretory carrier membrane protein 5, Sv2a - synaptic vesicle glycoprotein 2a, Slc17a7 - solute carrier family 17 (sodium-dependent inorganic phosphate cotransporter), member 7, Sv2c - synaptic vesicle glycoprotein 2c, Slc2a3 - solute car…
GO:0005791	rough endoplasmic reticulum	0.000797	0.00776	2.14	6963	25	1950	15	[Canx - calnexin, Hsd11b1 - hydroxysteroid 11-beta dehydrogenase 1, Fkrp - fukutin related protein, Map2 - microtubule-associated protein 2, Arsb - arylsulfatase b, Adcyap1r1 - adenylate cyclase activating polypeptide 1 receptor 1, Sec61a1 - sec61 alpha 1 subunit (s. cerevisiae), Epha5 - epha5, Rpn2 - ribophorin ii, Psen1 - presenilin 1, Htr5a - 5-hydroxytryptamine (serotonin) receptor 5a, Dd25 -…
GO:0032809	neuronal cell body membrane	0.00081	0.00782	3.12	6963	8	1950	7	[Kcnc1 - potassium voltage gated channel, shaw-related subfamily, member 1, Il6st - interleukin 6 signal transducer, Cadm2 - cell adhesion molecule 2, Atp2b1 - atpase, ca++ transporting, plasma membrane 1, Kcnc3 - potassium voltage gated channel, shaw-related subfamily, member 3, Gabra6 - gamma-aminobutyric acid (gaba) a receptor, alpha 6, Atp2b2 - atpase, ca++ transporting, plasma membrane 2]
GO:0044298	cell body membrane	0.00081	0.00775	3.12	6963	8	1950	7	[Kcnc1 - potassium voltage gated channel, shaw-related subfamily, member 1, Il6st - interleukin 6 signal transducer, Cadm2 - cell adhesion molecule 2, Atp2b1 - atpase, ca++ transporting, plasma membrane 1, Kcnc3 - potassium voltage gated channel, shaw-related subfamily, member 3, Gabra6 - gamma-aminobutyric acid (gaba) a receptor, alpha 6, Atp2b2 - atpase, ca++ transporting, plasma membrane 2]
GO:0060077	inhibitory synapse	0.00081	0.00768	3.12	6963	8	1950	7	[Iqsec3 - iq motif and sec7 domain 3, Nlgn2 - neuroligin 2, Nlgn3 - neuroligin 3, Slc32a1 - solute carrier family 32 (gaba vesicular transporter), member 1, Maf1 - maf1 homolog (s. cerevisiae), Gabrb3 - gamma-aminobutyric acid (gaba) a receptor, beta 3, Gabrg2 - gamma-aminobutyric acid (gaba) a receptor, gamma 2]
GO:0017146	N-methyl-D-aspartate selective glutamate receptor complex	0.00081	0.00762	3.12	6963	8	1950	7	[Grin1 - glutamate receptor, ionotropic, n-methyl d-aspartate 1, Shank1 - sh3 and multiple ankyrin repeat domains 1, Grin2c - glutamate receptor, ionotropic, n-methyl d-aspartate 2c, Grin2b - glutamate receptor, ionotropic, n-methyl d-aspartate 2b, Grin2a - glutamate receptor, ionotropic, n-methyl d-aspartate 2a, Nlgn1 - neuroligin 1, Dlgap3 - discs, large (drosophila) homolog-associated protein …

## Sheet: legend
The text below is quoted directly from the GOrilla website, http://cbl-gorilla.cs.technion.ac.il
Enrichment (N, B, n, b) is defined as follows:
N - is the total number of genes
B - is the total number of genes associated with a specific GO term
n - is the number of genes in the top of the user's input list or in the target set when appropriate
b - is the number of genes in the intersection
Enrichment = (b/n) / (B/N)
