# Supplementary material for: Digital expression profiling of the compartmentalized translatome of Purkinje neurons
Source: HighWire-hosted journal article supplement (doi:10.1101/gr.164095.113), 2014-06-05
Supplement: Supplemental_Table.S6.xlsx [file Supplemental_Table.S6.xlsx]

## Sheet: Table S6
cluster	logFC.pulldown	logCPM.pulldown	logFC.mbcyt	logCPM.mbcyt	FDR.mbcyt	CV.cyto	CV.memb	rank.mbcyt	Symbol	Symbol.mouse	manual	biotype	aba	cajigas	CDT	Doyle	Kirsch	repet.cyto	repet.memb	tome	desc.long	Expression relative to Grid2
Receptors
chr4_143705249_143705257_+	1.15006	9.86823	0.254766	10.0198	0.0147336	25.2561	61.1576	6808	Itpr1	Itpr1	FALSE	protein_coding	1	yes	/	yes	0.41983	6	6	TRUE	inositol 1,4,5-trisphosphate receptor type 1 isoform 3 [Source:RefSeq peptide;Acc:NP_001257526]	104.221
chrX_3718597_3718666_-	1.28219	8.63264	1.37551	9.40924	2.82159e-52	15.3121	98.2255	147	Gria3	Gria3	FALSE	protein_coding	0.5	yes	/	/	-1.1901	6	6	TRUE	glutamate receptor 3 isoform 1 precursor [Source:RefSeq peptide;Acc:NP_116785]	44.2596
chr8_1438288_1438366_-	0.485171	8.52519	0.466319	8.08437	1.41381e-06	18.7443	61.7196	2802	Gria4	Gria4	FALSE	protein_coding	1	/	yes	/	-1.0895	6	6	TRUE	glutamate receptor 4 isoform 2 precursor [Source:RefSeq peptide;Acc:NP_001106655]	41.083
chr1_5744579_5744652_-	2.44144	7.50696	0.593565	8.34253	4.03343e-11	18.8695	3.91805	1522	Grm1	Grm1	FALSE	protein_coding	1	/	/	/	NA	6	6	TRUE	metabotropic glutamate receptor 1 isoform alpha precursor [Source:RefSeq peptide;Acc:NP_058707]	20.2835
chr3_3471843_3471914_-	1.77807	5.47176	3.91104	6.12513	5.83677e-62	6.32258	6.51441	114	Grin1	Grin1	FALSE	protein_coding	1	yes	/	/	-1.1129	6	6	TRUE	Glutamate [NMDA] receptor subunit zeta-1 [Source:UniProtKB/Swiss-Prot;Acc:P35439]	4.94865
chr11_28106769_28106788_-	3.32161	5.37613	0.247537	5.48466	0.431396	1.51788	6.89539	13590	Grik1	Grik1	FALSE	protein_coding	1	/	/	yes	2.0437	6	6	TRUE	Glutamate receptor, ionotropic kainate 1 [Source:UniProtKB/Swiss-Prot;Acc:P22756]	4.63127
chr2_172385066_172385067_-	1.07713	4.68428	1.6322	4.86707	8.35127e-08	5.1144	3.37312	2312	Gria2	Gria2	FALSE	protein_coding	1	yes	yes	/	-1.2667	5	6	TRUE	glutamate receptor 2 isoform 1 precursor [Source:RefSeq peptide;Acc:NP_058957]	2.86704
chr10_27313553_27313554_-	0.73276	4.60086	2.0253	4.31889	6.98627e-08	2.31401	3.12635	2280	Gabra1	Gabra1	FALSE	protein_coding	1	yes	yes	/	-0.46962	5	6	TRUE	Gamma-aminobutyric acid receptor subunit alpha-1 [Source:UniProtKB/Swiss-Prot;Acc:P62813]	2.70594
chr3_114410461_114410539_-	0.709642	4.40414	-1.08212	4.85146	0.00121567	4.04177	2.32913	43275	Trpm7	Trpm7	FALSE	protein_coding	0.5	/	/	/	-1.708	6	6	TRUE	transient receptor potential cation channel, subfamily M, member 7 [Source:MGI Symbol;Acc:MGI:1929996]	2.36104
chr5_63611517_63611585_-	1.22452	3.75783	2.2914	5.41022	5.20067e-19	2.7069	3.06625	712	Gabbr2	Gabbr2	FALSE	protein_coding	1	yes	/	/	NA	6	6	TRUE	Gamma-aminobutyric acid type B receptor subunit 2 [Source:UniProtKB/Swiss-Prot;Acc:O88871]	1.50849
chr1_84189641_84189687_-	2.68223	3.69977	1.20576	2.49323	0.130055	1.10372	0.649228	9892	RYR1	Ryr1	FALSE	protein_coding	1	/	/	/	NA	5	6	TRUE	Ryanodine receptor 1 [Source:UniProtKB/Swiss-Prot;Acc:F1LMY4];Uncharacterized protein [Source:UniProtKB/TrEMBL;Acc:F1LMY4]	1.44899
chr2_123183857_123183926_-	2.2351	3.66957	0.716053	4.40843	0.066675	4.30953	5.15999	8655	Trpc3	Trpc3	FALSE	protein_coding	1	/	/	yes	3.2279	6	6	TRUE	short transient receptor potential channel 3 [Source:RefSeq peptide;Acc:NP_068539]	1.41897
chr8_45962031_45962080_-	0.621295	3.22467	0.867991	4.55716	0.0151285	1.18419	3.87906	6840	Grik4	Grik4	FALSE	protein_coding	0	yes	yes	/	-1.8849	6	6	TRUE	glutamate receptor, ionotropic kainate 4 precursor [Source:RefSeq peptide;Acc:NP_036704]	1.04242
chr4_93301539_93301541_+	2.36606	3.16472	1.83264	4.92173	2.52583e-09	1.8448	3.46427	1868	Grid2	Grid2	FALSE	protein_coding	1	/	/	yes	3.3384	6	6	TRUE	Glutamate receptor delta-2 subunit [Source:UniProtKB/Swiss-Prot;Acc:Q63226]	1
chr2_181969585_181969609_-	2.68985	3.04327	1.12117	3.89126	0.0126233	2.26942	0.0736806	6664	Chrnb2	Chrnb2	FALSE	protein_coding	1	yes	/	/	0.22016	6	6	TRUE	Neuronal acetylcholine receptor subunit beta-2 [Source:UniProtKB/Swiss-Prot;Acc:P12390]	0.919259
chr20_11051056_11051147_+	1.19973	2.73573	-0.384295	3.07662	0.634304	0.862112	4.30849	29107	Trpm2	Trpm2	FALSE	protein_coding	1	/	/	/	-1.2474	6	5	TRUE	transient receptor potential cation channel subfamily M member 2 [Source:RefSeq peptide;Acc:NP_001011559]	0.742781
chr8_111850132_111850140_-	3.59343	2.10222	-0.0191315	3.07977	1	5.74937	3.23406	22395	Grm2	Grm2	FALSE	protein_coding	1	/	/	/	-2.0736	5	5	TRUE	Metabotropic glutamate receptor 2 [Source:UniProtKB/Swiss-Prot;Acc:P31421]	0.478801
chr2_172524242_172524305_-	1.29379	1.52057	1.58442	3.84066	0.00040057	2.51445	6.93638	4483	Glrb	Glrb	FALSE	protein_coding	1	yes	/	/	-0.05072	6	6	TRUE	Glycine receptor subunit beta [Source:UniProtKB/Swiss-Prot;Acc:P20781]	0.319934
Voltage-dependent calcium Channels
chr3_34193145_34193230_-	2.54728	7.58302	-1.59892	8.48814	3.07336e-63	1.46124	9.86553	47912	Cacnb4	Cacnb4	FALSE	protein_coding	1	/	yes	/	-1.4355	6	6	TRUE	voltage-dependent L-type calcium channel subunit beta-4 [Source:RefSeq peptide;Acc:NP_001099203]	21.3816
chr17_88981598_88981599_+	1.94516	5.79567	-0.405107	6.45532	0.035588	2.04173	1.03612	40164	Cacnb2	Cacnb2	FALSE	protein_coding	1	/	yes	yes	1.2633	6	6	TRUE	Voltage-dependent L-type calcium channel subunit beta-2 [Source:UniProtKB/Swiss-Prot;Acc:Q8VGC3]	6.19434
chr10_83112707_83112766_-	2.76741	5.48778	1.73667	7.51972	6.49758e-23	4.13563	37.3075	530	Cacna1g	Cacna1g	FALSE	protein_coding	1	yes	/	yes	0.9529	6	6	TRUE	Voltage-dependent T-type calcium channel subunit alpha-1G [Source:UniProtKB/Swiss-Prot;Acc:O54898]	5.00393
chr19_25255788_25255876_-	1.13687	5.1219	3.01276	4.69528	3.50559e-15	2.54018	6.263	982	Cacna1a	Cacna1a	FALSE	protein_coding	1	yes	/	/	-0.84639	5	6	TRUE	Voltage-dependent P/Q-type calcium channel subunit alpha-1A [Source:UniProtKB/Swiss-Prot;Acc:P54282]	3.88302
chr16_5059490_5059583_-	0.00707109	4.63961	1.56047	4.03802	0.000242843	2.94032	2.32257	4296	Cacna2d3	Cacna2d3	FALSE	protein_coding	0	yes	/	/	-1.6004	6	6	TRUE	Voltage-dependent calcium channel subunit alpha-2/delta-3 Voltage-dependent calcium channel subunit alpha-2-3 Voltage-dependent calcium channel subunit delta-3 [Source:UniProtKB/Swiss-Prot;Acc:Q8CFG5]	2.77961
chr8_112643501_112643590_+	3.28931	4.56273	2.44101	5.47475	3.73712e-20	3.92668	15.0011	646	Cacna2d2	Cacna2d2	FALSE	protein_coding	1	/	/	/	0.56505	6	6	TRUE	voltage-dependent calcium channel subunit alpha-2/delta-2 precursor [Source:RefSeq peptide;Acc:NP_783182]	2.63538
chr1_64144779_64144823_-	3.55625	4.33677	0.158965	4.52601	0.800297	2.74234	11.0761	18299	Cacng7	Cacng7	FALSE	protein_coding	1	yes	/	/	-0.33444	6	6	TRUE	Voltage-dependent calcium channel gamma-7 subunit [Source:UniProtKB/Swiss-Prot;Acc:P62957]	2.25332
Voltage-dependent sodium Channels
chr8_48068794_48068847_+	0.34205	8.71085	-0.555243	8.51622	7.66076e-10	18.6232	20.9928	46196	Scn2b	Scn2b	FALSE	protein_coding	0	/	/	/	-1.2879	6	6	TRUE	Sodium channel subunit beta-2 [Source:UniProtKB/Swiss-Prot;Acc:P54900]	46.7251
chr3_48364137_48364194_-	1.3184	7.22491	0.180013	7.69678	0.172712	1.123	3.50645	10522	Scn1a	Scn1a	TRUE	protein_coding	1	/	/	/	-1.5769	6	6	TRUE	Sodium channel protein type 1 subunit alpha [Source:UniProtKB/Swiss-Prot;Acc:P04774]	16.6816
chr1_86171844_86171915_-	1.74957	6.08167	1.82397	6.42106	2.18131e-25	2.75172	2.33859	458	Scn1b	Scn1b	FALSE	protein_coding	1	/	/	/	-1.3538	6	6	TRUE	Sodium channel subunit beta-1 [Source:UniProtKB/Swiss-Prot;Acc:Q00954]	7.55244
chr7_139625465_139625553_+	2.38043	4.45249	1.01955	5.75708	6.69159e-06	7.80649	3.88621	3174	Scn8a	Scn8a	FALSE	protein_coding	1	/	yes	/	-1.4119	6	6	TRUE	Sodium channel protein type 8 subunit alpha [Source:UniProtKB/Swiss-Prot;Acc:O88420]	2.44149
chr8_48099624_48099627_+	1.87908	2.73923	4.28735	2.98628	7.46514e-07	5.05603	3.12748	2681	Scn4b	Scn4b	FALSE	protein_coding	1	yes	/	yes	-0.12441	1	6	TRUE	Sodium channel subunit beta-4 [Source:UniProtKB/Swiss-Prot;Acc:Q7M730]	0.744584
Voltage-dependent potassium channels
chr1_95078861_95078863_+	2.08306	7.44777	2.45881	7.48444	6.3242e-66	6.47448	12.8695	104	Kcnc3	Kcnc3	FALSE	protein_coding	1	/	/	/	0.61479	6	6	TRUE	potassium voltage-gated channel subfamily C member 3 [Source:RefSeq peptide;Acc:NP_446449]	19.4682
chr4_163013192_163013195_-	1.09236	5.19082	1.40937	5.22013	5.17823e-07	5.09725	2.76005	2592	Kcna1	Kcna1	FALSE	protein_coding	1	yes	/	/	-1.4339	6	6	TRUE	Potassium voltage-gated channel subfamily A member 1 [Source:UniProtKB/Swiss-Prot;Acc:P10499]	4.07301
chr5_169624799_169624863_-	1.24745	5.08602	-0.165302	4.01063	0.817261	3.05733	4.68282	26127	Kcnab2	Kcnab2	FALSE	protein_coding	1	yes	/	/	NA	6	6	TRUE	Voltage-gated potassium channel subunit beta-2 [Source:UniProtKB/Swiss-Prot;Acc:P62483]	3.78764
chr7_55806812_55806815_-	0.392279	3.84613	1.47082	4.57474	6.07307e-05	2.57758	6.26464	3793	Kcnmb4	Kcnmb4	FALSE	protein_coding	1	yes	/	/	-0.71666	6	6	TRUE	calcium-activated potassium channel subunit beta-4 [Source:RefSeq peptide;Acc:NP_076450]	1.6037
chr15_934905_934908_+	2.51082	3.77583	-0.182342	3.73371	0.791505	4.53617	1.72409	26587	Kcnma1	Kcnma1	FALSE	protein_coding	1	yes	/	yes	0.81681	6	6	TRUE	Calcium-activated potassium channel subunit alpha-1 [Source:UniProtKB/Swiss-Prot;Acc:Q62976]	1.52743
chr13_88341085_88341184_+	0.223138	3.37442	-0.532202	3.03309	0.489454	9.11674	11.4286	31458	Kcnj10	Kcnj10	FALSE	protein_coding	1	/	/	/	NA	5	3	TRUE	ATP-sensitive inward rectifier potassium channel 10 [Source:UniProtKB/Swiss-Prot;Acc:P49655]	1.15644
chr1_96968749_96968758_+	0.677382	3.18975	1.96187	2.70805	0.0677942	7.25548	7.24174	8680	Kcnc1	Kcnc1	FALSE	protein_coding	0.5	/	/	/	-1.5283	4	4	TRUE	potassium voltage-gated channel subfamily C member 1 [Source:RefSeq peptide;Acc:NP_036988]	1.0175
chr2_202560150_202560216_+	1.63247	3.14468	-0.110589	4.05563	0.869306	1.73672	4.43258	25341	Kcna2	Kcna2	FALSE	protein_coding	0.5	yes	/	/	-2.2946	6	6	TRUE	Potassium voltage-gated channel subfamily A member 2 [Source:UniProtKB/Swiss-Prot;Acc:P63142]	0.986202
chrX_26711725_26711791_-	0.930009	3.06264	-0.963398	2.87277	0.264642	2.64895	2.60295	34973	Kcnd1	Kcnd1	FALSE	protein_coding	0.5	/	/	/	NA	6	5	TRUE	potassium voltage-gated channel subfamily D member 1 precursor [Source:RefSeq peptide;Acc:NP_001099218]	0.931687
chr2_181715850_181715884_+	0.624606	2.98444	-0.513918	2.72306	0.589765	2.1657	1.93719	29829	Kcnn3	Kcnn3	FALSE	protein_coding	0.5	yes	/	/	-1.2024	6	5	TRUE	Small conductance calcium-activated potassium channel protein 3 [Source:UniProtKB/Swiss-Prot;Acc:P70605]	0.882532
chr19_49892645_49892655_-	2.84351	2.48516	-0.10408	2.87362	1	5.08778	5.26904	22406	Kcng4	Kcng4	FALSE	protein_coding	1	/	/	yes	0.32869	5	4	TRUE	potassium voltage-gated channel subfamily G member 4 [Source:RefSeq peptide;Acc:NP_001100905]	0.624354
chr19_56216586_56216628_+	1.8996	2.42003	0.572178	3.98747	0.238508	5.29746	2.39049	11323	Kcnk1	Kcnk1	FALSE	protein_coding	0.5	/	/	/	-1.1926	6	6	TRUE	Potassium channel subfamily K member 1 [Source:UniProtKB/Swiss-Prot;Acc:Q9Z2T2]	0.596795
chr3_45153520_45153522_-	2.47539	2.00919	-0.132294	2.78576	0.911268	2.40456	3.63759	24611	Kcnh7	Kcnh7	FALSE	protein_coding	NIA	yes	/	/	-1.5004	6	5	TRUE	Potassium voltage-gated channel subfamily H member 7 [Source:UniProtKB/Swiss-Prot;Acc:O54852]	0.4489
chr4_163123676_163123679_-	2.39533	1.57714	1.55182	2.50122	0.0553112	2.30267	1.49802	8382	Kcna6	Kcna6	FALSE	protein_coding	1	yes	/	yes	-0.70395	4	6	TRUE	Potassium voltage-gated channel subfamily A member 6 [Source:UniProtKB/Swiss-Prot;Acc:P17659]	0.332728
chr3_154772977_154772999_+	8.51783	1.28179	3.02857	2.44569	0.00114698	3.26688	1.2173	4999	Kcnk15	Kcnk15	FALSE	protein_coding	0	/	/	/	NA	2	6	TRUE	Potassium channel subfamily K member 15 [Source:UniProtKB/Swiss-Prot;Acc:Q8R5I0]	0.271132
Na/K pumps
chr13_88265140_88265228_-	-1.77876	7.59337	2.16762	6.45272	1.11777e-26	22.4806	80.7236	425	Atp1a2	Atp1a2	FALSE	protein_coding	1	/	yes	/	NA	6	6	TRUE	Sodium/potassium-transporting ATPase subunit alpha-2 [Source:UniProtKB/Swiss-Prot;Acc:P06686]	21.5355
chr13_80234541_80234548_-	4.98213	6.44151	1.26267	8.39553	4.42824e-48	3.45981	19.7074	168	Atp1b1	Atp1b1	FALSE	protein_coding	0.5	yes	yes	/	-0.86945	6	6	TRUE	Sodium/potassium-transporting ATPase subunit beta-1 [Source:UniProtKB/Swiss-Prot;Acc:P07340]	9.69192
chr2_196658536_196658597_-	-0.947088	5.7374	3.26788	4.93089	6.83414e-18	3.94289	9.87178	786	Atp1a1	Atp1a1	FALSE	protein_coding	0.5	yes	/	/	-0.97496	5	6	TRUE	Sodium/potassium-transporting ATPase subunit alpha-1 [Source:UniProtKB/Swiss-Prot;Acc:P06685]	5.94913
chr1_80297325_80297332_-	1.26231	5.13787	2.55718	5.34381	9.80398e-20	5.91032	3.24747	670	Atp1a3	Atp1a3	FALSE	protein_coding	0.5	yes	/	/	-1.1165	6	6	TRUE	Sodium/potassium-transporting ATPase subunit alpha-3 [Source:UniProtKB/Swiss-Prot;Acc:P06687]	3.92623
chr3_170064508_170064595_-	0.388159	3.40113	-0.210801	1.74682	0.927296	1.2715	2.54422	24387	Nkain4	Nkain4	FALSE	protein_coding	1	/	/	/	NA	5	4	TRUE	sodium/potassium-transporting ATPase subunit beta-1-interacting protein 4 precursor [Source:RefSeq peptide;Acc:NP_001100020]	1.17805
chr10_56423975_56423977_-	-0.0592374	2.42076	0.937889	3.41082	0.201148	4.74883	9.79092	10861	Atp1b2	Atp1b2	FALSE	protein_coding	1	/	/	/	-1.0163	5	4	TRUE	sodium/potassium-transporting ATPase subunit beta-2 [Source:RefSeq peptide;Acc:NP_036639]	0.597098
Other electrogenic processes
chr2_58347634_58347644_-	0.782612	9.01081	-0.40698	8.79887	6.1165e-05	244.252	202.987	44493	Slc1a3	Slc1a3	FALSE	protein_coding	0	/	/	/	4.6257	6	6	TRUE	Excitatory amino acid transporter 1 [Source:UniProtKB/Swiss-Prot;Acc:P24942]	57.5237
chr3_43979055_43979057_+	1.39635	7.25017	-0.635244	8.09921	8.31207e-11	6.30214	2.60229	46354	Slc4a10	Slc4a10	FALSE	protein_coding	1	yes	/	/	NA	6	6	TRUE	Sodium-driven chloride bicarbonate exchanger [Source:UniProtKB/Swiss-Prot;Acc:Q80ZA5]	16.9762
chr10_37795676_37795747_+	3.05128	5.65856	-2.78395	7.22025	5.60179e-60	4.32334	1.08672	47896	Vdac1	Vdac1	FALSE	protein_coding	1	/	/	/	-0.8995	6	6	TRUE	Voltage-dependent anion-selective channel protein 1 [Source:UniProtKB/Swiss-Prot;Acc:Q9Z2L0]	5.63273
chr14_20739195_20739264_-	0.623488	4.13282	1.24213	4.24238	0.00146185	6.55793	22.2446	5152	Slc4a4	Slc4a4	FALSE	protein_coding	1	/	/	/	-0.79565	5	5	TRUE	Electrogenic sodium bicarbonate cotransporter 1 [Source:UniProtKB/Swiss-Prot;Acc:Q9JI66]	1.95625
chr11_82435421_82435515_+	-0.261696	3.66246	2.95697	4.26213	4.37842e-13	1.01401	3.17914	1226	Clcn2	Clcn2	FALSE	protein_coding	1	yes	/	/	-1.2895	6	6	TRUE	Chloride channel protein 2 [Source:UniProtKB/Swiss-Prot;Acc:P35525]	1.41199
chr15_2528933_2528934_-	2.78737	2.83363	-1.52437	4.00863	0.00136491	4.58291	6.0674	43215	Vdac2	Vdac2	FALSE	protein_coding	1	/	/	/	NA	6	5	TRUE	Voltage-dependent anion-selective channel protein 2 [Source:UniProtKB/Swiss-Prot;Acc:P81155]	0.794936
chr5_151682889_151682931_-	1.3415	2.4132	2.94262	2.36904	0.002574	1.24401	3.30655	5472	Slc9a1	Slc9a1	FALSE	protein_coding	0	yes	/	/	-1.5093	3	5	TRUE	Sodium/hydrogen exchanger 1 [Source:UniProtKB/Swiss-Prot;Acc:P26431]	0.593977
Calcium transport
chr7_36493544_36493618_+	1.31446	5.96234	1.10513	7.35142	1.62553e-14	15.8825	20.9583	1056	Atp2b1	Atp2b1	FALSE	protein_coding	0	yes	/	/	-1.0583	6	6	TRUE	Plasma membrane calcium-transporting ATPase 1 [Source:UniProtKB/Swiss-Prot;Acc:P11505]	6.95291
chr4_149764172_149764174_-	1.57273	5.8733	1.43409	5.34696	1.77566e-08	3.22884	6.22622	2104	Atp2b2	Atp2b2	FALSE	protein_coding	1	yes	yes	/	-0.79782	6	6	TRUE	ATPase, Ca++ transporting, plasma membrane 2 [Source:MGI Symbol;Acc:MGI:105368]	6.53678
chr12_35266570_35266605_+	4.55469	4.27523	2.27028	4.95275	9.36718e-13	5.46078	6.65339	1260	Atp2a2	Atp2a2	FALSE	protein_coding	1	yes	yes	/	-0.67565	5	6	TRUE	sarcoplasmic/endoplasmic reticulum calcium ATPase 2 isoform b [Source:RefSeq peptide	2.15921
Calcium-binding protein
chr1_77252771_77252836_-	2.44301	10.5389	-0.91901	11.3958	4.42776e-41	21.109	45.5873	47742	Calm3	Calm3	FALSE	protein_coding	1	yes	/	yes	NA	6	6	TRUE	Calmodulin [Source:UniProtKB/Swiss-Prot	165.898
chr6_124477528_124477581_+	3.34506	10.4636	-0.828526	11.192	1.84758e-34	33.2354	37.8163	47613	Calm1	Calm1	FALSE	protein_coding	1	yes	yes	/	NA	6	6	TRUE	Calmodulin [Source:UniProtKB/Swiss-Prot	157.466
chr9_110186196_110186262_-	1.59043	8.4526	-1.81527	8.8475	3.82638e-76	9.82993	2.35251	47951	Myl12b	Myl12b	FALSE	protein_coding	0.5	/	yes	yes	NA	6	6	TRUE	Myosin regulatory light chain 12B [Source:UniProtKB/Swiss-Prot	39.067
chr3_8956357_8956452_+	1.66138	8.08319	-1.76608	8.71115	1.10276e-88	6.35052	8.55592	47984	Sptan1	Sptan1	FALSE	protein_coding	1	/	/	/	NA	6	6	TRUE	spectrin alpha chain, non-erythrocytic 1 [Source:RefSeq peptide	30.2416
chr5_30455643_30455649_+	5.43457	7.93473	-1.62453	10.3348	6.79669e-121	50.3894	13.6182	48030	Calb1	Calb1	FALSE	protein_coding	1	yes	/	yes	6.0616	6	6	TRUE	Calbindin [Source:UniProtKB/Swiss-Prot	27.2844
chr10_35883488_35883581_-	1.73038	7.53074	1.25333	9.58628	3.55306e-75	12.8992	25.8766	85	Canx	Canx	FALSE	protein_coding	1	yes	/	/	-1.5423	6	6	TRUE	Calnexin [Source:UniProtKB/Swiss-Prot	20.6207
chr4_56228536_56228621_+	1.14109	6.81488	0.242044	7.76021	0.157222	45.3321	17.5801	10300	Calu	Calu	FALSE	protein_coding	1	/	/	/	-1.0093	6	6	TRUE	calumenin isoform b precursor [Source:RefSeq peptide	12.5547
chr17_15907403_15907468_+	0.761047	6.39584	-0.909296	6.8078	9.77172e-08	6.40576	3.42521	45722	Sncb	Sncb	FALSE	protein_coding	1	/	/	/	NA	6	6	TRUE	Beta-synuclein [Source:UniProtKB/Swiss-Prot	9.38995
chr5_172836070_172836131_+	1.31391	6.29559	0.674417	7.1513	6.78122e-07	0.5879	3.4796	2661	Sdf4	Sdf4	FALSE	protein_coding	0.5	/	/	/	-1.7174	6	6	TRUE	45 kDa calcium-binding protein [Source:UniProtKB/Swiss-Prot	8.75959
chr7_116127544_116127546_-	3.44718	5.89219	-1.8251	6.94015	8.33352e-29	4.69144	3.64785	47487	Pvalb	Pvalb	FALSE	protein_coding	0.5	/	yes	/	-1.0312	6	6	TRUE	Parvalbumin alpha [Source:UniProtKB/Swiss-Prot	6.62291
chr5_148278406_148278495_-	2.1963	5.81698	-2.04051	6.87288	1.82711e-32	2.4667	4.79505	47567	Hpca	Hpca	FALSE	protein_coding	1	yes	/	yes	-0.46767	6	6	TRUE	Neuron-specific calcium-binding protein hippocalcin [Source:UniProtKB/Swiss-Prot	6.28652
chr10_40439638_40439719_-	1.71685	5.38875	-2.79254	5.89362	1.90183e-22	7.42186	6.72902	47267	Anxa6	Anxa6	FALSE	protein_coding	1	/	yes	/	0.71784	6	5	TRUE	Annexin A6 [Source:UniProtKB/Swiss-Prot	4.67197
chr4_160665262_160665265_-	2.35643	5.36678	0.686177	5.88104	0.00425397	4.57146	4.85013	5824	Clstn3	Clstn3	FALSE	protein_coding	1	/	/	yes	-0.97562	6	6	TRUE	calsyntenin-3 precursor [Source:RefSeq peptide	4.60133
chr1_85519523_85519568_+	1.70667	5.0492	-0.518564	6.3152	0.0312119	5.26028	10.9891	40354	Capns1	Capns1	FALSE	protein_coding	1	/	/	/	-0.91606	6	6	TRUE	Calpain small subunit 1 [Source:UniProtKB/Swiss-Prot	3.6922
chr14_98060284_98060291_+	1.50924	4.49047	-0.842459	4.11121	0.106953	18.8434	3.84875	37927	Ppp3r1	Ppp3r1	FALSE	protein_coding	1	yes	yes	/	-0.79701	6	5	TRUE	Calcineurin subunit B type 1 [Source:UniProtKB/Swiss-Prot	2.50663
chr9_73878443_73878510_+	4.94172	3.91503	-1.18522	4.37289	0.00323585	2.24969	5.79386	42716	Plcd4	Plcd4	FALSE	protein_coding	NIA	/	/	/	NA	6	5	TRUE	1-phosphatidylinositol 4,5-bisphosphate phosphodiesterase delta-4 [Source:UniProtKB/Swiss-Prot	1.68215
chr1_212899764_212899837_+	2.23906	3.88437	1.77399	4.78797	1.61052e-07	2.27214	18.8739	2408	Syt7	Syt7	FALSE	protein_coding	1	/	/	/	NA	6	6	TRUE	synaptotagmin-7 [Source:RefSeq peptide	1.64678
chr10_68716028_68716030_+	1.53015	3.51358	-1.09642	1.46207	0.573711	1.64095	2.60827	30055	Cdk5r1	Cdk5r1	FALSE	protein_coding	1	yes	/	/	NA	5	3	TRUE	Cyclin-dependent kinase 5 activator 1 Cyclin-dependent kinase 5 activator 1, p35 Cyclin-dependent kinase 5 activator 1, p25 [Source:UniProtKB/Swiss-Prot	1.27355
chr3_106658734_106658823_-	1.681	3.16268	-0.277058	4.90298	0.487973	1.47198	1.54723	31477	Ehd4	Ehd4	FALSE	protein_coding	1	/	/	/	-1.2317	6	6	TRUE	EH domain-containing protein 4 [Source:RefSeq peptide	0.998583
chr19_24964767_24964771_+	1.58573	2.81742	0.118725	4.69145	0.813006	4.13421	0.428965	18478	Calr	Calr	FALSE	protein_coding	1	yes	/	/	-0.48945	6	6	TRUE	Calreticulin [Source:UniProtKB/Swiss-Prot	0.786051
chr15_64162113_64162114_-	0.895492	2.34498	-1.75405	-0.00646874	0.793487	2.74396	5.79962	26546	Calm2	Calm2	FALSE	protein_coding	1	yes	/	/	NA	2	1	TRUE	calmodulin [Source:RefSeq peptide	0.566543
chr6_41458664_41458671_+	8.33763	2.02096	-1.31293	2.72668	0.111232	2.32064	3.14092	37811	Hpcal1	Hpcal1	FALSE	protein_coding	1	/	/	/	NA	6	4	TRUE	Hippocalcin-like protein 1 [Source:UniProtKB/Swiss-Prot	0.452577
chr12_27252611_27252613_-	8.9088	1.53514	-0.791435	3.20319	0.237145	2.93884	1.16762	35405	Caln1	Caln1	FALSE	protein_coding	1	yes	yes	/	-1.3091	5	6	TRUE	Calcium-binding protein 8 [Source:UniProtKB/Swiss-Prot	0.323182
chr2_197183061_197183062_+	8.681	1.44782	3.94434	1.57143	0.0313208	2.90874	1.40332	7624	Casq2	Casq2	FALSE	protein_coding	1	/	/	yes	1.0954	1	6	TRUE	calsequestrin-2 precursor [Source:RefSeq peptide	0.3042
Neuromodulator receptors
chr3_169679722_169679795_+	0.0132126	6.93647	-0.115119	7.13231	0.566757	0.677121	10.6811	30152	Ogfr	Ogfr	FALSE	protein_coding	1	/	/	/	NA	6	6	TRUE	opioid growth factor receptor [Source:RefSeq peptide;Acc:NP_445792]	13.6587
chr7_55324542_55324547_+	0.885214	4.55827	1.71291	4.68314	4.29007e-07	5.30893	2.63072	2550	Ptprr	Ptprr	FALSE	protein_coding	1	/	/	yes	1.8001	6	6	TRUE	receptor-type tyrosine-protein phosphatase R isoform 1 precursor [Source:RefSeq peptide;Acc:NP_446046]	2.62724
chr7_116503008_116503101_-	1.18224	4.36728	0.006645	2.19702	1	2.05763	6.16519	21014	Sstr3	Sstr3	FALSE	protein_coding	1	/	/	/	-1.4152	5	3	TRUE	Somatostatin receptor type 3 [Source:UniProtKB/Swiss-Prot;Acc:P30936]	2.30147
chr10_93339288_93339372_+	-1.72084	4.25905	2.68839	2.02543	0.051312	2.74396	4.6961	8283	Crhr1	Crhr1	FALSE	protein_coding	0	yes	/	/	-1.7674	2	4	TRUE	Corticotropin-releasing factor receptor 1 [Source:UniProtKB/Swiss-Prot;Acc:P35353]	2.13513
chr1_177230873_177230952_-	-1.00103	3.81937	1.18387	4.05776	0.00571133	2.6796	6.47416	6037	Gprc5b	Gprc5b	FALSE	protein_coding	0.5	/	/	/	-0.9077	5	6	TRUE	G-protein coupled receptor family C group 5 member B [Source:RefSeq peptide;Acc:NP_001099774]	1.57423
chr17_95323173_95323174_+	0.630719	3.75096	1.36658	2.76483	0.109602	4.93372	3.80843	9532	Gpr158	Gpr158	FALSE	protein_coding	0	yes	yes	/	-1.9912	4	6	TRUE	Probable G-protein coupled receptor 158 [Source:UniProtKB/Swiss-Prot;Acc:D4A6L0]	1.50132
chrX_22291965_22291967_-	0.644327	3.5693	0.2091	4.69179	0.643771	2.07681	4.77254	16080	Atp6ap2	Atp6ap2	FALSE	protein_coding	1	yes	/	/	-0.36246	6	6	TRUE	Renin receptor [Source:UniProtKB/Swiss-Prot;Acc:Q6AXS4]	1.3237
chr7_118069522_118069559_-	1.60794	2.84397	0.335291	1.97753	0.856662	6.418	2.54196	19074	Nptxr;Cbx6	Nptxr	FALSE	protein_coding	0.5	/	/	/	NA	4	4	TRUE	Neuronal pentraxin receptor [Source:UniProtKB/Swiss-Prot;Acc:O35764];Neuronal pentraxin receptor [Source:UniProtKB/Swiss-Prot;Acc:O35764];chromobox protein homolog 6 [Source:RefSeq peptide;Acc:NP_001012119]	0.800654
chr3_169160024_169160048_-	7.18832	2.46455	1.00647	4.01056	0.0204753	2.50877	4.19169	7130	HRH3;Hrh3	Hrh3	FALSE	protein_coding	1	/	/	/	NA	6	6	TRUE	Histamine H3 receptor [Source:UniProtKB/Swiss-Prot;Acc:Q9QYN8];Histamine H3 receptor [Source:UniProtKB/Swiss-Prot;Acc:Q9QYN8];Histamine H3 receptor [Source:UniProtKB/Swiss-Prot;Acc:Q9QYN8]	0.615496
chr8_86701566_86701570_-	1.70642	2.2519	1.46692	1.76349	0.324791	1.44744	4.05253	12317	Htr1b	Htr1b	FALSE	protein_coding	1	yes	/	yes	0.32228	4	4	TRUE	5-hydroxytryptamine receptor 1B [Source:UniProtKB/Swiss-Prot;Acc:P28564]	0.531145
chr3_114867321_114867364_+	2.78012	2.11909	1.36826	3.21789	0.0568605	4.21241	10.6075	8417	Adra2b	Adra2b	FALSE	protein_coding	0.5	/	/	/	NA	4	6	TRUE	Alpha-2B adrenergic receptor [Source:UniProtKB/Swiss-Prot;Acc:P19328]	0.484432
chr17_11811469_11811481_-	8.38177	1.87179	-0.516096	2.89119	0.52881	6.08077	7.70045	30739	Ntrk2	Ntrk2	FALSE	protein_coding	1	yes	yes	/	-1.3816	6	4	TRUE	opioid growth factor receptor-like protein 1 [Source:RefSeq peptide;Acc:NP_001020879]	0.408121
Others
chr4_125875680_125875709_+	2.15028	4.89212	0.388524	5.93594	0.12516	6.74195	9.13906	9800	Slc6a6	Slc6a6	FALSE	protein_coding	1	/	/	/	NA	6	6	TRUE	Sodium- and chloride-dependent taurine transporter [Source:UniProtKB/Swiss-Prot;Acc:P31643]	3.31129
chr5_40007822_40007824_+	2.45587	4.62257	0.104008	5.09915	0.811362	1.26615	2.43263	18462	Gpr63	Gpr63	FALSE	protein_coding	1	yes	/	yes	3.1318	6	6	TRUE	probable G-protein coupled receptor 63 [Source:RefSeq peptide;Acc:NP_001100110]	2.74699
chr1_95032532_95032569_-	0.446457	4.49456	-1.31399	4.52451	0.00052017	3.2119	0.385414	43709	Nr1h2	Nr1h2	FALSE	protein_coding	0.5	/	/	/	-1.638	6	6	TRUE	Oxysterols receptor LXR-beta [Source:UniProtKB/Swiss-Prot;Acc:Q62755]	2.51374
chr7_118070048_118070051_-	1.07556	3.49807	-0.555817	4.24271	0.22517	3.04482	0.0680644	35598	Nptxr	Nptxr	FALSE	protein_coding	1	/	/	yes	NA	6	6	TRUE	Neuronal pentraxin receptor [Source:UniProtKB/Swiss-Prot;Acc:O35764]	1.25993
chr4_150231979_150232032_+	3.10952	3.37092	0.18558	1.76028	0.929855	1.50609	4.21222	20045	Slc6a1	Slc6a1	FALSE	protein_coding	0	/	/	/	NA	5	4	TRUE	Sodium- and chloride-dependent GABA transporter 1 [Source:UniProtKB/Swiss-Prot;Acc:P23978]	1.15365
chr5_63976854_63976934_+	1.47978	3.12163	0.865758	5.03442	0.00358271	7.4578	5.92536	5698	Tgfbr1	Tgfbr1	FALSE	protein_coding	0.5	/	/	/	NA	6	6	TRUE	TGF-beta receptor type-1 [Source:UniProtKB/Swiss-Prot;Acc:P80204]	0.970571
chr7_138440134_138440197_+	0.777243	2.95378	4.43234	3.18366	1.011e-08	2.05888	9.96957	2032	Asic1	Asic1	FALSE	protein_coding	1	/	/	/	NA	2	5	TRUE	Acid-sensing ion channel 1 [Source:UniProtKB/Swiss-Prot;Acc:P55926]	0.863972
chr19_9664545_9664620_+	1.59484	2.84352	1.03175	2.72699	0.306756	7.26515	4.00104	12149	Slc38a7	Slc38a7	FALSE	protein_coding	1	yes	/	/	NA	4	5	TRUE	Putative sodium-coupled neutral amino acid transporter 7 [Source:UniProtKB/Swiss-Prot;Acc:Q6JWR2]	0.800401
chr5_155437846_155437889_-	0.946298	2.68533	3.12718	2.98883	4.0417e-06	0.897857	2.14031	3018	Ephb2	Ephb2	FALSE	protein_coding	0.5	yes	/	/	-2.0027	4	6	TRUE	ephrin type-B receptor 2 precursor [Source:RefSeq peptide;Acc:NP_001120791]	0.717278
chr11_76222520_76222544_-	0.52282	2.65437	-0.0188888	3.1865	1	6.78711	1.87889	22680	Il1rap	Il1rap	FALSE	protein_coding	1	/	/	yes	-2.0584	5	6	TRUE	interleukin-1 receptor accessory protein isoform b precursor [Source:RefSeq peptide;Acc:NP_001161312]	0.702048
chr12_8979372_8979448_+	0.462153	2.13927	-2.30625	2.92783	0.00334731	4.27398	2.79345	42697	Gpr12	Gpr12	FALSE	protein_coding	0.5	yes	/	yes	-2.2053	6	3	TRUE	G-protein coupled receptor 12 [Source:UniProtKB/Swiss-Prot;Acc:P30951]	0.491255
chr9_106503090_106503132_-	3.52059	1.90545	1.21384	3.2032	0.0392565	0.130413	2.9457	7907	Ptprm	Ptprm	FALSE	protein_coding	1	/	yes	/	NA	6	6	TRUE	receptor-type tyrosine-protein phosphatase mu precursor [Source:RefSeq peptide;Acc:NP_001162103]	0.417754
chr7_12419843_12419845_-	7.55809	1.88476	1.18338	4.01061	0.00554711	2.39213	2.37676	6012	Slc1a6	Slc1a6	FALSE	protein_coding	1	/	/	yes	4.7941	6	6	TRUE	excitatory amino acid transporter 4 [Source:RefSeq peptide;Acc:NP_114454]	0.411807
chr9_22247133_22247219_-	1.93219	1.73558	0.298867	2.42297	0.898362	3.97322	7.37467	19638	Ogfrl1	Ogfrl1	FALSE	protein_coding	1	/	yes	/	-0.95456	5	4	TRUE	melanocortin-2 receptor accessory protein 2 [Source:RefSeq peptide;Acc:NP_001102244]	0.37135
chr3_86827540_86827618_+	1.60825	1.65009	-1.27424	4.98484	6.13934e-05	16.7954	10.5625	44491	Traf6	Traf6	FALSE	protein_coding	0	/	/	/	-2.0484	6	5	TRUE	TNF receptor-associated factor 6 [Source:UniProtKB/Swiss-Prot;Acc:B5DF45]	0.349985
chr1_267495507_267495511_+	0.919187	1.41651	-2.11836	2.28978	0.0782193	5.65964	4.19549	38662	Grk5	Grk5	FALSE	protein_coding	0	/	/	/	NA	5	2	TRUE	G protein-coupled receptor kinase 5 [Source:RefSeq peptide;Acc:NP_110456]	0.297671

## Sheet: legend
id	identifier of the CAGEscan cluster (consisting of, seperatad by underline: chromosome, most 5' position of the Paraclu cluster, most 3' position of the Paraclu cluster, strand)
logFC.pulldown	fold-change between the bound and unbound samples
logCPM.pulldown	normalized (counts-per-million), average tag count between the bound and unbound samples
logFC.mbcyt	fold-change between the membrane (bound to rough endoplasmatic reticulum) and cytoplasmic samples
logCPM.mbcyt	normalized (counts-per-million), average tag count between the membrane and cytoplasmic samples
FDR.mbcyt	false discovery rate ("Benjamini and Hochberg FDR adjusted p-value") of the differential expression test between the membrane and cytoplasmic samples
CV.cyto	coefficient of variation of the normalised expression values of the clusters for the cytoplasmic libraries at time points 5 and 15
CV.memb	coefficient of variation of the normalised expression values of the clusters for the membrane libraries at time points 5 and 15
rank.mbcyt	This rank is similar to rank.pulldown, but here enrichment means: enriched in rER.
Symbol	gene symbol according to CAGEscan analysis (Symbol.full), augmented by manual curation
Symbol.mouse	gene symbol of the mouse paralog according to CAGEscan analysis (Symbol.full), augmented by manual curation
manual	TRUE if the symbol was edited after automatic annotation
biotype	biotype of Symbol.full according to Ensembl
aba	A score expressing the Purkinje-specificity of this gene when compared to other genes in the same area, based on images from the Allan Brain Atlas. The score is "0 for ubiquitous expression (including no expression), 0.5 for moderate to high relative intensity in Purkinje layer, 1 for high to specific expression, or “NIA” (not in ABA) when no entry could be found on a gene symbol or its aliases" …
cajigas	yes if this gene is present in "Table S1: List of all transcripts identified in Neuropil layer of CAI Hippocampus after 454 sequencing" (Cajigas 2012), otherwise "/"
CDT	yes if this gene is present in the Cerebellar Transcriptome Database (Sato 2008), otherwise "/"
Doyle	yes if this gene is present in the Allan Brain Atlas (Doyle 2008), otherwise "/"
Kirsch	if this gene is present in the Purkinje layer according to (Kirsch 2012) then its score is shown, otherwise "NA"
repet.cyto	number of cytoplasmic libraries at timepoints 5 and 15 in which the cluster has at least one tag
repet.memb	number of membrane libraries at timepoints 5 and 15 in which the cluster has at least one tag
tome	TRUE if this gene has a high-confidence score according to the machine learning classifier described in the manuscript, otherwise FALSE
desc.long	full text description of Symbol.full
Expression relative to Grid2	Amount of Grid2 transcript in the nine replicates
