# Supplementary material for: Digital expression profiling of the compartmentalized translatome of Purkinje neurons
Source: HighWire-hosted journal article supplement (doi:10.1101/gr.164095.113), 2014-06-05
Supplement: Supplemental_Table.S7.xlsx [file Supplemental_Table.S7.xlsx]

## Sheet: biological process
GO Term	Description	P-value	FDR q-value	Enrichment	N	B	n	b	Genes
GO:0008090	retrograde axon cargo transport	1.61e-07	0.00145	9.31	7083	7	761	7	[Sod1 - superoxide dismutase 1, soluble, Dynlrb1 - dynein light chain roadblock-type 1, Ndel1 - nude nuclear distribution gene e homolog (a. nidulans)-like 1, Dst - dystonin, Pafah1b1 - platelet-activating factor acetylhydrolase, isoform 1b, subunit 1, Nefl - neurofilament, light polypeptide, Dync1li2 - dynein, cytoplasmic 1 light intermediate chain 2]
GO:0006457	protein folding	1.06e-06	0.00479	2.67	7083	94	761	27	[Hspa9 - heat shock protein 9, Canx - calnexin, Dnajb11 - dnaj (hsp40) homolog, subfamily b, member 11, Pex19 - peroxisomal biogenesis factor 19, Ppia - peptidylprolyl isomerase a (cyclophilin a), Pfdn1 - prefoldin subunit 1, Hsph1 - heat shock 105/110 protein 1, Fkbp3 - fk506 binding protein 3, Aars - alanyl-trna synthetase, Dnaja4 - dnaj (hsp40) homolog, subfamily a, member 4, Pdrg1 - p53 and d…
GO:0008088	axon cargo transport	3.03e-06	0.0091	4.17	7083	29	761	13	[Dynlrb1 - dynein light chain roadblock-type 1, Uchl1 - ubiquitin carboxyl-terminal esterase l1 (ubiquitin thiolesterase), Bloc1s1 - biogenesis of lysosomal organelles complex-1, subunit 1, Nefl - neurofilament, light polypeptide, Snapap - snap-associated protein, App - amyloid beta (a4) precursor protein, Sod1 - superoxide dismutase 1, soluble, Ndel1 - nude nuclear distribution gene e homolog (a…
GO:0051234	establishment of localization	9.32e-06	0.021	1.33	7083	1236	761	177	[Nudc - nuclear distribution gene c homolog (a. nidulans), Pex19 - peroxisomal biogenesis factor 19, Timm13 - translocase of inner mitochondrial membrane 13 homolog (yeast), Ywhab - tyrosine 3-monooxygenase/tryptophan 5-monooxygenase activation protein, beta polypeptide, Atp5h - atp synthase, h+ transporting, mitochondrial fo complex, subunit d, Ywhag - tyrosine 3-monooxygenase/tryptophan 5-monoo…
GO:0006810	transport	9.77e-06	0.0176	1.34	7083	1212	761	174	[Pex19 - peroxisomal biogenesis factor 19, Timm13 - translocase of inner mitochondrial membrane 13 homolog (yeast), Ywhab - tyrosine 3-monooxygenase/tryptophan 5-monooxygenase activation protein, beta polypeptide, Atp5h - atp synthase, h+ transporting, mitochondrial fo complex, subunit d, Ywhag - tyrosine 3-monooxygenase/tryptophan 5-monooxygenase activation protein, gamma polypeptide, Atp5i - at…
GO:0044765	single-organism transport	2.89e-05	0.0435	1.39	7083	880	761	131	[Pex19 - peroxisomal biogenesis factor 19, Ywhab - tyrosine 3-monooxygenase/tryptophan 5-monooxygenase activation protein, beta polypeptide, Atp5h - atp synthase, h+ transporting, mitochondrial fo complex, subunit d, Ywhag - tyrosine 3-monooxygenase/tryptophan 5-monooxygenase activation protein, gamma polypeptide, Atp5i - atp synthase, h+ transporting, mitochondrial fo complex, subunit e, Add1 - …
GO:0022900	electron transport chain	3.5e-05	0.0451	2.79	7083	60	761	18	[Sdha - succinate dehydrogenase complex, subunit a, flavoprotein (fp), Higd1a - hig1 hypoxia inducible domain family, member 1a, Ndufa10 - nadh dehydrogenase (ubiquinone) 1 alpha subcomplex 10, Ndufa2 - nadh dehydrogenase (ubiquinone) 1 alpha subcomplex, 2, Uqcrc1 - ubiquinol-cytochrome c reductase core protein i, Ndufa9 - nadh dehydrogenase (ubiquinone) 1 alpha subcomplex, 9, Etfb - electron-tra…
GO:0007018	microtubule-based movement	3.94e-05	0.0445	2.54	7083	77	761	21	[Map4 - microtubule-associated protein 4, Dynlrb1 - dynein light chain roadblock-type 1, Dpcd - deleted in primary ciliary dyskinesia, Uchl1 - ubiquitin carboxyl-terminal esterase l1 (ubiquitin thiolesterase), Arl3 - adp-ribosylation factor-like 3, Bloc1s1 - biogenesis of lysosomal organelles complex-1, subunit 1, Kif1a - kinesin family member 1a, Kif5a - kinesin family member 5a, Nefl - neurofil…
GO:0010970	microtubule-based transport	5.17e-05	0.0518	2.92	7083	51	761	16	[Dynlrb1 - dynein light chain roadblock-type 1, Uchl1 - ubiquitin carboxyl-terminal esterase l1 (ubiquitin thiolesterase), Arl3 - adp-ribosylation factor-like 3, Bloc1s1 - biogenesis of lysosomal organelles complex-1, subunit 1, Nefl - neurofilament, light polypeptide, Snapap - snap-associated protein, App - amyloid beta (a4) precursor protein, Dync1i1 - dynein cytoplasmic 1 intermediate chain 1,…
GO:0030705	cytoskeleton-dependent intracellular transport	6.73e-05	0.0607	2.86	7083	52	761	16	[Dynlrb1 - dynein light chain roadblock-type 1, Uchl1 - ubiquitin carboxyl-terminal esterase l1 (ubiquitin thiolesterase), Arl3 - adp-ribosylation factor-like 3, Bloc1s1 - biogenesis of lysosomal organelles complex-1, subunit 1, Nefl - neurofilament, light polypeptide, Snapap - snap-associated protein, App - amyloid beta (a4) precursor protein, Dync1i1 - dynein cytoplasmic 1 intermediate chain 1,…
GO:0051649	establishment of localization in cell	0.000115	0.094	1.44	7083	616	761	95	[Hspa9 - heat shock protein 9, Nudc - nuclear distribution gene c homolog (a. nidulans), Pex19 - peroxisomal biogenesis factor 19, Chp - calcium binding protein p22, Pik3r1 - phosphoinositide-3-kinase, regulatory subunit 1 (alpha), Ywhab - tyrosine 3-monooxygenase/tryptophan 5-monooxygenase activation protein, beta polypeptide, Bloc1s1 - biogenesis of lysosomal organelles complex-1, subunit 1, Yw…
GO:0048489	synaptic vesicle transport	0.000236	0.177	3.1	7083	36	761	12	[Cdk5 - cyclin-dependent kinase 5, Canx - calnexin, Pacsin1 - protein kinase c and casein kinase substrate in neurons 1, Synj1 - synaptojanin 1, Ap3m2 - adaptor-related protein complex 3, mu 2 subunit, Bloc1s1 - biogenesis of lysosomal organelles complex-1, subunit 1, Sptbn2 - spectrin, beta, non-erythrocytic 2, Cplx2 - complexin 2, Snapap - snap-associated protein, Rab3a - rab3a, member ras onco…
GO:0006091	generation of precursor metabolites and energy	0.000274	0.19	2.01	7083	125	761	27	[Higd1a - hig1 hypoxia inducible domain family, member 1a, Ndufa10 - nadh dehydrogenase (ubiquinone) 1 alpha subcomplex 10, Ndufa2 - nadh dehydrogenase (ubiquinone) 1 alpha subcomplex, 2, Bloc1s1 - biogenesis of lysosomal organelles complex-1, subunit 1, Etfb - electron-transfer-flavoprotein, beta polypeptide, Bax - bcl2-associated x protein, Ppp1ca - protein phosphatase 1, catalytic subunit, alp…
GO:0019725	cellular homeostasis	0.000286	0.184	1.61	7083	300	761	52	[Txndc15 - thioredoxin domain containing 15, Ubb - ubiquitin b, Chp - calcium binding protein p22, Add1 - adducin 1 (alpha), Sod1 - superoxide dismutase 1, soluble, Cacnb4 - calcium channel, voltage-dependent, beta 4 subunit, Sod2 - superoxide dismutase 2, mitochondrial, Aldoa - aldolase a, fructose-bisphosphate, Ddit3 - dna-damage inducible transcript 3, Nme2 - non-metastatic cells 2, protein (n…
GO:0046907	intracellular transport	0.000299	0.18	1.46	7083	498	761	78	[Hspa9 - heat shock protein 9, Pex19 - peroxisomal biogenesis factor 19, Chp - calcium binding protein p22, Pik3r1 - phosphoinositide-3-kinase, regulatory subunit 1 (alpha), Ywhab - tyrosine 3-monooxygenase/tryptophan 5-monooxygenase activation protein, beta polypeptide, Bloc1s1 - biogenesis of lysosomal organelles complex-1, subunit 1, Ywhag - tyrosine 3-monooxygenase/tryptophan 5-monooxygenase …
GO:0009205	purine ribonucleoside triphosphate metabolic process	0.000333	0.188	1.96	7083	133	761	28	[Gnl3l - guanine nucleotide binding protein-like 3 (nucleolar)-like, Nsf - n-ethylmaleimide-sensitive factor, Atp5h - atp synthase, h+ transporting, mitochondrial fo complex, subunit d, Atp5o - atp synthase, h+ transporting, mitochondrial f1 complex, o subunit, Atp5i - atp synthase, h+ transporting, mitochondrial fo complex, subunit e, Gfm2 - g elongation factor, mitochondrial 2, Guk1 - guanylate…
GO:0032469	endoplasmic reticulum calcium ion homeostasis	0.000433	0.23	5.08	7083	11	761	6	[Bax - bcl2-associated x protein, Fis1 - fission 1 (mitochondrial outer membrane) homolog (s. cerevisiae), Psen1 - presenilin 1, App - amyloid beta (a4) precursor protein, Itpr1 - inositol 1,4,5-trisphosphate receptor, type 1, Tmbim6 - transmembrane bax inhibitor motif containing 6]
GO:0009199	ribonucleoside triphosphate metabolic process	0.000553	0.277	1.9	7083	137	761	28	[Gnl3l - guanine nucleotide binding protein-like 3 (nucleolar)-like, Nsf - n-ethylmaleimide-sensitive factor, Atp5h - atp synthase, h+ transporting, mitochondrial fo complex, subunit d, Atp5o - atp synthase, h+ transporting, mitochondrial f1 complex, o subunit, Atp5i - atp synthase, h+ transporting, mitochondrial fo complex, subunit e, Gfm2 - g elongation factor, mitochondrial 2, Guk1 - guanylate…
GO:0009144	purine nucleoside triphosphate metabolic process	0.000553	0.263	1.9	7083	137	761	28	[Gnl3l - guanine nucleotide binding protein-like 3 (nucleolar)-like, Nsf - n-ethylmaleimide-sensitive factor, Atp5h - atp synthase, h+ transporting, mitochondrial fo complex, subunit d, Atp5o - atp synthase, h+ transporting, mitochondrial f1 complex, o subunit, Atp5i - atp synthase, h+ transporting, mitochondrial fo complex, subunit e, Gfm2 - g elongation factor, mitochondrial 2, Guk1 - guanylate…
GO:0014012	peripheral nervous system axon regeneration	0.000605	0.273	7.45	7083	5	761	4	[Apoe - apolipoprotein e, Map1b - microtubule-associated protein 1b, Calu - calumenin, Nefl - neurofilament, light polypeptide]
GO:0046034	ATP metabolic process	0.000905	0.389	2.2	7083	76	761	18	[Atp5a1 - atp synthase, h+ transporting, mitochondrial f1 complex, alpha subunit 1, cardiac muscle, Nsf - n-ethylmaleimide-sensitive factor, Atp5b - atp synthase, h+ transporting, mitochondrial f1 complex, beta polypeptide, Atp5h - atp synthase, h+ transporting, mitochondrial fo complex, subunit d, Atp5o - atp synthase, h+ transporting, mitochondrial f1 complex, o subunit, Hsp90aa1 - heat shock p…
GO:0009203	ribonucleoside triphosphate catabolic process	0.000934	0.383	1.98	7083	108	761	23	[Rab28 - rab28, member ras oncogene family, Gnl3l - guanine nucleotide binding protein-like 3 (nucleolar)-like, Rragc - ras-related gtp binding c, Atp5a1 - atp synthase, h+ transporting, mitochondrial f1 complex, alpha subunit 1, cardiac muscle, Nsf - n-ethylmaleimide-sensitive factor, Rab11b - rab11b, member ras oncogene family, Atp5h - atp synthase, h+ transporting, mitochondrial fo complex, su…
GO:0009207	purine ribonucleoside triphosphate catabolic process	0.000934	0.366	1.98	7083	108	761	23	[Rab28 - rab28, member ras oncogene family, Gnl3l - guanine nucleotide binding protein-like 3 (nucleolar)-like, Rragc - ras-related gtp binding c, Atp5a1 - atp synthase, h+ transporting, mitochondrial f1 complex, alpha subunit 1, cardiac muscle, Nsf - n-ethylmaleimide-sensitive factor, Rab11b - rab11b, member ras oncogene family, Atp5h - atp synthase, h+ transporting, mitochondrial fo complex, su…

## Sheet: molecular function
GO Term	Description	P-value	FDR q-value	Enrichment	N	B	n	b	Genes
GO:0051082	unfolded protein binding	1.37e-06	0.00385	3.42	7083	49	761	18	[Hsp90b1 - heat shock protein 90, beta, member 1, Hspa9 - heat shock protein 9, Canx - calnexin, Tbca - tubulin folding cofactor a, Dnajb11 - dnaj (hsp40) homolog, subfamily b, member 11, Pfdn1 - prefoldin subunit 1, Dnaja4 - dnaj (hsp40) homolog, subfamily a, member 4, Hsp90aa1 - heat shock protein 90, alpha (cytosolic), class a member 1, Pdrg1 - p53 and dna damage regulated 1, Hspa8 - heat shoc…
GO:0015078	hydrogen ion transmembrane transporter activity	2.83e-06	0.00397	3.05	7083	61	761	20	[Cox5a - cytochrome c oxidase, subunit va, Cox7b - cytochrome c oxidase subunit viib, Atp6v0a1 - atpase, h+ transporting, lysosomal v0 subunit a1, Atp5a1 - atp synthase, h+ transporting, mitochondrial f1 complex, alpha subunit 1, cardiac muscle, Cox7c - cytochrome c oxidase, subunit viic, Atp5b - atp synthase, h+ transporting, mitochondrial f1 complex, beta polypeptide, Atp5h - atp synthase, h+ t…
GO:0003735	structural constituent of ribosome	4.21e-05	0.0394	2.16	7083	125	761	29	[Mrpl17 - mitochondrial ribosomal protein l17, Mrps21 - mitochondrial ribosomal protein s21, Rps16 - ribosomal protein s16, Rpl23a - ribosomal protein l23a, Rplp1 - ribosomal protein, large, p1, Rpl12 - ribosomal protein l12, Rplp2 - ribosomal protein, large p2, Rpl37 - ribosomal protein l37, Rpl18a - ribosomal protein l18a, Rpl36al - ribosomal protein l36a-like, Rpl23 - ribosomal protein l23, Mr…
GO:0032558	adenyl deoxyribonucleotide binding	0.000132	0.0928	9.31	7083	4	761	4	[St13 - suppression of tumorigenicity 13, Ercc3 - excision repair cross-complementing rodent repair deficiency, complementation group 3, Hsp90ab1 - heat shock protein 90 alpha (cytosolic), class b member 1, Hsp90aa1 - heat shock protein 90, alpha (cytosolic), class a member 1]
GO:0032554	purine deoxyribonucleotide binding	0.000132	0.0743	9.31	7083	4	761	4	[St13 - suppression of tumorigenicity 13, Ercc3 - excision repair cross-complementing rodent repair deficiency, complementation group 3, Hsp90ab1 - heat shock protein 90 alpha (cytosolic), class b member 1, Hsp90aa1 - heat shock protein 90, alpha (cytosolic), class a member 1]
GO:0032564	dATP binding	0.000132	0.0619	9.31	7083	4	761	4	[St13 - suppression of tumorigenicity 13, Ercc3 - excision repair cross-complementing rodent repair deficiency, complementation group 3, Hsp90ab1 - heat shock protein 90 alpha (cytosolic), class b member 1, Hsp90aa1 - heat shock protein 90, alpha (cytosolic), class a member 1]
GO:0050815	phosphoserine binding	0.000132	0.053	9.31	7083	4	761	4	[Nedd4 - neural precursor cell expressed, developmentally down-regulated 4, Ywhab - tyrosine 3-monooxygenase/tryptophan 5-monooxygenase activation protein, beta polypeptide, Ywhae - tyrosine 3-monooxygenase/tryptophan 5-monooxygenase activation protein, epsilon polypeptide, Pin1 - peptidylprolyl cis/trans isomerase, nima-interacting 1]
GO:0003954	NADH dehydrogenase activity	0.000248	0.087	3.81	7083	22	761	9	[Ndufs1 - nadh dehydrogenase (ubiquinone) fe-s protein 1, Ndufb7 - nadh dehydrogenase (ubiquinone) 1 beta subcomplex, 7, Ndufb8 - nadh dehydrogenase (ubiquinone) 1 beta subcomplex 8, Ndufa7 - nadh dehydrogenase (ubiquinone) 1 alpha subcomplex, 7, Ndufa13 - nadh dehydrogenase (ubiquinone) 1 alpha subcomplex, 13, Ndufa12 - nadh dehydrogenase (ubiquinone) 1 alpha subcomplex, 12, Ndufs4 - nadh dehydr…
GO:0000149	SNARE binding	0.00039	0.122	2.81	7083	43	761	13	[Tmed9 - transmembrane emp24 protein transport domain containing 9, Syp - synaptophysin, Nsf - n-ethylmaleimide-sensitive factor, Stxbp1 - syntaxin binding protein 1, Sec22b - sec22 vesicle trafficking protein homolog b (s. cerevisiae), Snapap - snap-associated protein, Syt7 - synaptotagmin vii, Sptan1 - spectrin, alpha, non-erythrocytic 1, Snap25 - synaptosomal-associated protein 25, Sept5 - sep…
GO:0004129	cytochrome-c oxidase activity	0.000476	0.134	4.34	7083	15	761	7	[Cox5a - cytochrome c oxidase, subunit va, Cox6a1 - cytochrome c oxidase, subunit via, polypeptide 1, Cox7b - cytochrome c oxidase subunit viib, Ndufa4 - nadh dehydrogenase (ubiquinone) 1 alpha subcomplex, 4, Cox7c - cytochrome c oxidase, subunit viic, Cox6c - cytochrome c oxidase, subunit vic, Cox4i1 - cytochrome c oxidase subunit iv isoform 1]
GO:0016676	oxidoreductase activity, acting on a heme group of donors, oxygen as acceptor	0.000476	0.122	4.34	7083	15	761	7	[Cox5a - cytochrome c oxidase, subunit va, Cox6a1 - cytochrome c oxidase, subunit via, polypeptide 1, Cox7b - cytochrome c oxidase subunit viib, Ndufa4 - nadh dehydrogenase (ubiquinone) 1 alpha subcomplex, 4, Cox7c - cytochrome c oxidase, subunit viic, Cox6c - cytochrome c oxidase, subunit vic, Cox4i1 - cytochrome c oxidase subunit iv isoform 1]
GO:0015002	heme-copper terminal oxidase activity	0.000476	0.111	4.34	7083	15	761	7	[Cox5a - cytochrome c oxidase, subunit va, Cox6a1 - cytochrome c oxidase, subunit via, polypeptide 1, Cox7b - cytochrome c oxidase subunit viib, Ndufa4 - nadh dehydrogenase (ubiquinone) 1 alpha subcomplex, 4, Cox7c - cytochrome c oxidase, subunit viic, Cox6c - cytochrome c oxidase, subunit vic, Cox4i1 - cytochrome c oxidase subunit iv isoform 1]
GO:0017111	nucleoside-triphosphatase activity	0.000505	0.109	1.5	7083	390	761	63	[Ddx5 - dead (asp-glu-ala-asp) box polypeptide 5, Dync2li1 - dynein cytoplasmic 2 light intermediate chain 1, Eftud2 - elongation factor tu gtp binding domain containing 2, Atp5h - atp synthase, h+ transporting, mitochondrial fo complex, subunit d, Kif5a - kinesin family member 5a, Kif1a - kinesin family member 1a, Atp5i - atp synthase, h+ transporting, mitochondrial fo complex, subunit e, Gfm2 -…
GO:0016817	hydrolase activity, acting on acid anhydrides	0.000752	0.151	1.47	7083	419	761	66	[Ddx5 - dead (asp-glu-ala-asp) box polypeptide 5, Dync2li1 - dynein cytoplasmic 2 light intermediate chain 1, Eftud2 - elongation factor tu gtp binding domain containing 2, Atp5h - atp synthase, h+ transporting, mitochondrial fo complex, subunit d, Kif5a - kinesin family member 5a, Kif1a - kinesin family member 1a, Atp5i - atp synthase, h+ transporting, mitochondrial fo complex, subunit e, Gfm2 -…
GO:0016675	oxidoreductase activity, acting on a heme group of donors	0.000769	0.144	4.07	7083	16	761	7	[Cox5a - cytochrome c oxidase, subunit va, Cox6a1 - cytochrome c oxidase, subunit via, polypeptide 1, Cox7b - cytochrome c oxidase subunit viib, Ndufa4 - nadh dehydrogenase (ubiquinone) 1 alpha subcomplex, 4, Cox7c - cytochrome c oxidase, subunit viic, Cox6c - cytochrome c oxidase, subunit vic, Cox4i1 - cytochrome c oxidase subunit iv isoform 1]
GO:0005215	transporter activity	0.000957	0.168	1.44	7083	454	761	70	[Cox5a - cytochrome c oxidase, subunit va, Syp - synaptophysin, Cox7b - cytochrome c oxidase subunit viib, Chp - calcium binding protein p22, Atp5h - atp synthase, h+ transporting, mitochondrial fo complex, subunit d, Atp5i - atp synthase, h+ transporting, mitochondrial fo complex, subunit e, Slc39a7 - solute carrier family 39 (zinc transporter), member 7, Kcnc3 - potassium voltage gated channel,…
GO:0008137	NADH dehydrogenase (ubiquinone) activity	0.00097	0.16	3.55	7083	21	761	8	[Ndufs1 - nadh dehydrogenase (ubiquinone) fe-s protein 1, Ndufb7 - nadh dehydrogenase (ubiquinone) 1 beta subcomplex, 7, Ndufb8 - nadh dehydrogenase (ubiquinone) 1 beta subcomplex 8, Ndufa7 - nadh dehydrogenase (ubiquinone) 1 alpha subcomplex, 7, Ndufa13 - nadh dehydrogenase (ubiquinone) 1 alpha subcomplex, 13, Ndufa12 - nadh dehydrogenase (ubiquinone) 1 alpha subcomplex, 12, Ndufs4 - nadh dehydr…
GO:0050136	NADH dehydrogenase (quinone) activity	0.00097	0.151	3.55	7083	21	761	8	[Ndufs1 - nadh dehydrogenase (ubiquinone) fe-s protein 1, Ndufb7 - nadh dehydrogenase (ubiquinone) 1 beta subcomplex, 7, Ndufb8 - nadh dehydrogenase (ubiquinone) 1 beta subcomplex 8, Ndufa7 - nadh dehydrogenase (ubiquinone) 1 alpha subcomplex, 7, Ndufa13 - nadh dehydrogenase (ubiquinone) 1 alpha subcomplex, 13, Ndufa12 - nadh dehydrogenase (ubiquinone) 1 alpha subcomplex, 12, Ndufs4 - nadh dehydr…

## Sheet: cellular component
GO Term	Description	P-value	FDR q-value	Enrichment	N	B	n	b	Genes
GO:0030964	NADH dehydrogenase complex	1.45e-15	1.6e-12	5.97	7083	39	761	25	[Ndufa8 - nadh dehydrogenase (ubiquinone) 1 alpha subcomplex, 8, Ndufa1 - nadh dehydrogenase (ubiquinone) 1 alpha subcomplex, 1, Ndufb7 - nadh dehydrogenase (ubiquinone) 1 beta subcomplex, 7, Ndufa10 - nadh dehydrogenase (ubiquinone) 1 alpha subcomplex 10, Ndufa2 - nadh dehydrogenase (ubiquinone) 1 alpha subcomplex, 2, Ndufa12 - nadh dehydrogenase (ubiquinone) 1 alpha subcomplex, 12, Ndufb5 - nad…
GO:0045271	respiratory chain complex I	1.45e-15	8e-13	5.97	7083	39	761	25	[Ndufa1 - nadh dehydrogenase (ubiquinone) 1 alpha subcomplex, 1, Ndufa8 - nadh dehydrogenase (ubiquinone) 1 alpha subcomplex, 8, Ndufa10 - nadh dehydrogenase (ubiquinone) 1 alpha subcomplex 10, Ndufb7 - nadh dehydrogenase (ubiquinone) 1 beta subcomplex, 7, Ndufa2 - nadh dehydrogenase (ubiquinone) 1 alpha subcomplex, 2, Ndufb5 - nadh dehydrogenase (ubiquinone) 1 beta subcomplex, 5, Ndufa12 - nadh …
GO:0005747	mitochondrial respiratory chain complex I	1.45e-15	5.33e-13	5.97	7083	39	761	25	[Ndufa8 - nadh dehydrogenase (ubiquinone) 1 alpha subcomplex, 8, Ndufa1 - nadh dehydrogenase (ubiquinone) 1 alpha subcomplex, 1, Ndufb7 - nadh dehydrogenase (ubiquinone) 1 beta subcomplex, 7, Ndufa10 - nadh dehydrogenase (ubiquinone) 1 alpha subcomplex 10, Ndufa2 - nadh dehydrogenase (ubiquinone) 1 alpha subcomplex, 2, Ndufa12 - nadh dehydrogenase (ubiquinone) 1 alpha subcomplex, 12, Ndufb5 - nad…
GO:0044429	mitochondrial part	4.61e-15	1.27e-12	2.21	7083	413	761	98	[Cox5a - cytochrome c oxidase, subunit va, Higd1a - hig1 hypoxia inducible domain family, member 1a, Gpx4 - glutathione peroxidase 4, Timm13 - translocase of inner mitochondrial membrane 13 homolog (yeast), Atp5h - atp synthase, h+ transporting, mitochondrial fo complex, subunit d, Atp5i - atp synthase, h+ transporting, mitochondrial fo complex, subunit e, Ndufa12 - nadh dehydrogenase (ubiquinone…
GO:0044444	cytoplasmic part	1.31e-14	2.9e-12	1.3	7083	3059	761	428	[Nmt2 - n-myristoyltransferase 2, Cpe - carboxypeptidase e, Fmnl1 - formin-like 1, Add1 - adducin 1 (alpha), Gnpat - glyceronephosphate o-acyltransferase, Syt11 - synaptotagmin xi, Pitpnm1 - phosphatidylinositol transfer protein, membrane-associated 1, Rab5c - rab5c, member ras oncogene family, Aldoa - aldolase a, fructose-bisphosphate, Aldoc - aldolase c, fructose-bisphosphate, Cttn - cortactin,…
GO:0044455	mitochondrial membrane part	1.76e-14	3.25e-12	3.59	7083	109	761	42	[Ndufa1 - nadh dehydrogenase (ubiquinone) 1 alpha subcomplex, 1, Ndufa8 - nadh dehydrogenase (ubiquinone) 1 alpha subcomplex, 8, Ndufb7 - nadh dehydrogenase (ubiquinone) 1 beta subcomplex, 7, Ndufa10 - nadh dehydrogenase (ubiquinone) 1 alpha subcomplex 10, Cox7b - cytochrome c oxidase subunit viib, Fis1 - fission 1 (mitochondrial outer membrane) homolog (s. cerevisiae), Ndufa2 - nadh dehydrogenas…
GO:0044446	intracellular organelle part	2.49e-12	3.93e-10	1.29	7083	2879	761	399	[Thrap3 - thyroid hormone receptor associated protein 3, Ddx5 - dead (asp-glu-ala-asp) box polypeptide 5, Eftud2 - elongation factor tu gtp binding domain containing 2, Cpe - carboxypeptidase e, Add1 - adducin 1 (alpha), Gnpat - glyceronephosphate o-acyltransferase, Syt11 - synaptotagmin xi, Nono - non-pou domain containing, octamer-binding, Pitpnm1 - phosphatidylinositol transfer protein, membra…
GO:0044422	organelle part	1.08e-11	1.5e-09	1.28	7083	2922	761	401	[Thrap3 - thyroid hormone receptor associated protein 3, Ddx5 - dead (asp-glu-ala-asp) box polypeptide 5, Eftud2 - elongation factor tu gtp binding domain containing 2, Cpe - carboxypeptidase e, Add1 - adducin 1 (alpha), Gnpat - glyceronephosphate o-acyltransferase, Syt11 - synaptotagmin xi, Nono - non-pou domain containing, octamer-binding, Pitpnm1 - phosphatidylinositol transfer protein, membra…
GO:0031966	mitochondrial membrane	1.18e-10	1.45e-08	2.25	7083	269	761	65	[Ndufa8 - nadh dehydrogenase (ubiquinone) 1 alpha subcomplex, 8, Cox5a - cytochrome c oxidase, subunit va, Higd1a - hig1 hypoxia inducible domain family, member 1a, Gpx4 - glutathione peroxidase 4, Ndufa2 - nadh dehydrogenase (ubiquinone) 1 alpha subcomplex, 2, Timm13 - translocase of inner mitochondrial membrane 13 homolog (yeast), Csde1 - cold shock domain containing e1, rna binding, Atp5h - at…
GO:0032991	macromolecular complex	4.91e-10	5.42e-08	1.32	7083	2225	761	315	[Thrap3 - thyroid hormone receptor associated protein 3, Ddx5 - dead (asp-glu-ala-asp) box polypeptide 5, Nudc - nuclear distribution gene c homolog (a. nidulans), Pex19 - peroxisomal biogenesis factor 19, Pole4 - polymerase (dna-directed), epsilon 4 (p12 subunit), Mtpn - myotrophin, Atp5h - atp synthase, h+ transporting, mitochondrial fo complex, subunit d, Eftud2 - elongation factor tu gtp bind…
GO:0044445	cytosolic part	2.27e-09	2.28e-07	2.65	7083	144	761	41	[Pfdn1 - prefoldin subunit 1, Pik3r1 - phosphoinositide-3-kinase, regulatory subunit 1 (alpha), Bloc1s1 - biogenesis of lysosomal organelles complex-1, subunit 1, Nefl - neurofilament, light polypeptide, Uba52 - ubiquitin a-52 residue ribosomal protein fusion product 1, Snapap - snap-associated protein, Pdrg1 - p53 and dna damage regulated 1, Fam96b - family with sequence similarity 96, member b,…
GO:0005743	mitochondrial inner membrane	2.51e-09	2.31e-07	2.4	7083	190	761	49	[Ndufa8 - nadh dehydrogenase (ubiquinone) 1 alpha subcomplex, 8, Higd1a - hig1 hypoxia inducible domain family, member 1a, Cox5a - cytochrome c oxidase, subunit va, Gpx4 - glutathione peroxidase 4, Ndufa2 - nadh dehydrogenase (ubiquinone) 1 alpha subcomplex, 2, Timm13 - translocase of inner mitochondrial membrane 13 homolog (yeast), Csde1 - cold shock domain containing e1, rna binding, Atp5h - at…
GO:0019866	organelle inner membrane	1.84e-08	1.56e-06	2.25	7083	207	761	50	[Higd1a - hig1 hypoxia inducible domain family, member 1a, Cox5a - cytochrome c oxidase, subunit va, Ndufa8 - nadh dehydrogenase (ubiquinone) 1 alpha subcomplex, 8, Gpx4 - glutathione peroxidase 4, Ndufa2 - nadh dehydrogenase (ubiquinone) 1 alpha subcomplex, 2, Timm13 - translocase of inner mitochondrial membrane 13 homolog (yeast), Csde1 - cold shock domain containing e1, rna binding, Atp5h - at…
GO:0005739	mitochondrion	5.11e-08	4.03e-06	1.5	7083	917	761	148	[Cox5a - cytochrome c oxidase, subunit va, Higd1a - hig1 hypoxia inducible domain family, member 1a, Ctsb - cathepsin b, Gpx4 - glutathione peroxidase 4, Timm13 - translocase of inner mitochondrial membrane 13 homolog (yeast), Tdrkh - tudor and kh domain containing, Atp5h - atp synthase, h+ transporting, mitochondrial fo complex, subunit d, Atp5i - atp synthase, h+ transporting, mitochondrial fo …
GO:0031090	organelle membrane	5.49e-08	4.05e-06	1.5	7083	918	761	148	[Cox5a - cytochrome c oxidase, subunit va, Higd1a - hig1 hypoxia inducible domain family, member 1a, Ncstn - nicastrin, Gpx4 - glutathione peroxidase 4, Pex19 - peroxisomal biogenesis factor 19, Timm13 - translocase of inner mitochondrial membrane 13 homolog (yeast), Atp5h - atp synthase, h+ transporting, mitochondrial fo complex, subunit d, Cpe - carboxypeptidase e, Snapap - snap-associated prot…
GO:0044424	intracellular part	1.05e-07	7.24e-06	1.09	7083	5514	761	647	[Thrap3 - thyroid hormone receptor associated protein 3, Ddx5 - dead (asp-glu-ala-asp) box polypeptide 5, Acp1 - acid phosphatase 1, soluble, Cmpk1 - cytidine monophosphate (ump-cmp) kinase 1, Eftud2 - elongation factor tu gtp binding domain containing 2, Nmt2 - n-myristoyltransferase 2, Cpe - carboxypeptidase e, Fmnl1 - formin-like 1, Add1 - adducin 1 (alpha), Gnpat - glyceronephosphate o-acyltr…
GO:0022625	cytosolic large ribosomal subunit	3.09e-07	2.01e-05	3.72	7083	45	761	18	[Rpl18a - ribosomal protein l18a, Rpl37 - ribosomal protein l37, Rpl23 - ribosomal protein l23, Rpl36al - ribosomal protein l36a-like, Rpl13a - ribosomal protein l13a, Rpl35 - ribosomal protein l35, Rpl38 - ribosomal protein l38, Rpl36 - ribosomal protein l36, Uba52 - ubiquitin a-52 residue ribosomal protein fusion product 1, Rpl41 - ribosomal protein l41, Rpl34 - ribosomal protein l34, Rpl23a - …
GO:0042470	melanosome	6.02e-07	3.7e-05	3.32	7083	56	761	20	[Hsp90b1 - heat shock protein 90, beta, member 1, Ctsb - cathepsin b, Canx - calnexin, Ncstn - nicastrin, Atp6v0a1 - atpase, h+ transporting, lysosomal v0 subunit a1, Ywhab - tyrosine 3-monooxygenase/tryptophan 5-monooxygenase activation protein, beta polypeptide, Hsp90aa1 - heat shock protein 90, alpha (cytosolic), class a member 1, Calu - calumenin, Sec22b - sec22 vesicle trafficking protein ho…
GO:0048770	pigment granule	6.02e-07	3.5e-05	3.32	7083	56	761	20	[Hsp90b1 - heat shock protein 90, beta, member 1, Ctsb - cathepsin b, Canx - calnexin, Ncstn - nicastrin, Atp6v0a1 - atpase, h+ transporting, lysosomal v0 subunit a1, Ywhab - tyrosine 3-monooxygenase/tryptophan 5-monooxygenase activation protein, beta polypeptide, Hsp90aa1 - heat shock protein 90, alpha (cytosolic), class a member 1, Calu - calumenin, Sec22b - sec22 vesicle trafficking protein ho…
GO:0044391	ribosomal subunit	1.29e-06	7.15e-05	2.55	7083	106	761	29	[Mrps36 - mitochondrial ribosomal protein s36, Uba52 - ubiquitin a-52 residue ribosomal protein fusion product 1, Mrps21 - mitochondrial ribosomal protein s21, Rpl23a - ribosomal protein l23a, Rps16 - ribosomal protein s16, Rplp1 - ribosomal protein, large, p1, Rpl12 - ribosomal protein l12, Rplp2 - ribosomal protein, large p2, Rpl37 - ribosomal protein l37, Rpl18a - ribosomal protein l18a, Rpl36…
GO:0043234	protein complex	1.85e-06	9.76e-05	1.28	7083	1838	761	252	[Thrap3 - thyroid hormone receptor associated protein 3, Nudc - nuclear distribution gene c homolog (a. nidulans), Pex19 - peroxisomal biogenesis factor 19, Pole4 - polymerase (dna-directed), epsilon 4 (p12 subunit), Mtpn - myotrophin, Atp5h - atp synthase, h+ transporting, mitochondrial fo complex, subunit d, Add1 - adducin 1 (alpha), Ndufa12 - nadh dehydrogenase (ubiquinone) 1 alpha subcomplex,…
GO:0043229	intracellular organelle	2.2e-06	0.000111	1.13	7083	4249	761	515	[Thrap3 - thyroid hormone receptor associated protein 3, Ddx5 - dead (asp-glu-ala-asp) box polypeptide 5, Acp1 - acid phosphatase 1, soluble, Cmpk1 - cytidine monophosphate (ump-cmp) kinase 1, Eftud2 - elongation factor tu gtp binding domain containing 2, Nmt2 - n-myristoyltransferase 2, Cpe - carboxypeptidase e, Add1 - adducin 1 (alpha), Fmnl1 - formin-like 1, Gnpat - glyceronephosphate o-acyltr…
GO:0044297	cell body	3.3e-06	0.000159	1.89	7083	256	761	52	[Canx - calnexin, Gsto1 - glutathione s-transferase omega 1, Cpe - carboxypeptidase e, Kif5a - kinesin family member 5a, Epha7 - eph receptor a7, Slc1a3 - solute carrier family 1 (glial high affinity glutamate transporter), member 3, Sod1 - superoxide dismutase 1, soluble, Pmm2 - phosphomannomutase 2, Ncdn - neurochondrin, Map1b - microtubule-associated protein 1b, Cplx2 - complexin 2, Rab2a - ra…
GO:0043226	organelle	3.53e-06	0.000163	1.12	7083	4261	761	515	[Thrap3 - thyroid hormone receptor associated protein 3, Ddx5 - dead (asp-glu-ala-asp) box polypeptide 5, Acp1 - acid phosphatase 1, soluble, Cmpk1 - cytidine monophosphate (ump-cmp) kinase 1, Eftud2 - elongation factor tu gtp binding domain containing 2, Nmt2 - n-myristoyltransferase 2, Cpe - carboxypeptidase e, Add1 - adducin 1 (alpha), Fmnl1 - formin-like 1, Gnpat - glyceronephosphate o-acyltr…
GO:0043025	neuronal cell body	3.62e-06	0.00016	1.94	7083	230	761	48	[Txnrd1 - thioredoxin reductase 1, Canx - calnexin, Apoe - apolipoprotein e, Cacna1g - calcium channel, voltage-dependent, t type, alpha 1g subunit, Kif5a - kinesin family member 5a, Cpe - carboxypeptidase e, Slc1a3 - solute carrier family 1 (glial high affinity glutamate transporter), member 3, Epha7 - eph receptor a7, Hspa8 - heat shock protein 8, Ndufs7 - nadh dehydrogenase (ubiquinone) fe-s p…
GO:0097458	neuron part	6.37e-06	0.000271	1.56	7083	536	761	90	[Canx - calnexin, Syp - synaptophysin, Abat - 4-aminobutyrate aminotransferase, Plcb4 - phospholipase c, beta 4, Gad1 - glutamate decarboxylase 1, Acp1 - acid phosphatase 1, soluble, Pik3r1 - phosphoinositide-3-kinase, regulatory subunit 1 (alpha), Calm2 - calmodulin 2, Gsto1 - glutathione s-transferase omega 1, Mtpn - myotrophin, Kif5a - kinesin family member 5a, Cpe - carboxypeptidase e, Add1 -…
GO:0015934	large ribosomal subunit	6.77e-06	0.000277	3	7083	59	761	19	[Rpl37 - ribosomal protein l37, Rpl18a - ribosomal protein l18a, Rpl23 - ribosomal protein l23, Rpl36al - ribosomal protein l36a-like, Mrpl1 - mitochondrial ribosomal protein l1, Rpl13a - ribosomal protein l13a, Rpl35 - ribosomal protein l35, Rpl38 - ribosomal protein l38, Rpl36 - ribosomal protein l36, Uba52 - ubiquitin a-52 residue ribosomal protein fusion product 1, Rpl41 - ribosomal protein l…
GO:0044463	cell projection part	4.23e-05	0.00167	1.59	7083	410	761	70	[Canx - calnexin, Dync2li1 - dynein cytoplasmic 2 light intermediate chain 1, Syp - synaptophysin, Pex19 - peroxisomal biogenesis factor 19, Gad1 - glutamate decarboxylase 1, Plcb4 - phospholipase c, beta 4, Calm2 - calmodulin 2, Kif5a - kinesin family member 5a, Add1 - adducin 1 (alpha), Kcnc3 - potassium voltage gated channel, shaw-related subfamily, member 3, Slc1a3 - solute carrier family 1 (…
GO:0044464	cell part	0.00015	0.00573	1.05	7083	5959	761	674	[Thrap3 - thyroid hormone receptor associated protein 3, Ddx5 - dead (asp-glu-ala-asp) box polypeptide 5, Acp1 - acid phosphatase 1, soluble, Cmpk1 - cytidine monophosphate (ump-cmp) kinase 1, Eftud2 - elongation factor tu gtp binding domain containing 2, Nmt2 - n-myristoyltransferase 2, Cpe - carboxypeptidase e, Fmnl1 - formin-like 1, Add1 - adducin 1 (alpha), Epha7 - eph receptor a7, Gnpat - gl…
GO:0005840	ribosome	0.00017	0.00628	2.13	7083	109	761	25	[Canx - calnexin, Mrpl17 - mitochondrial ribosomal protein l17, Mrps21 - mitochondrial ribosomal protein s21, Rpl23a - ribosomal protein l23a, Rplp1 - ribosomal protein, large, p1, Rpl12 - ribosomal protein l12, Rplp2 - ribosomal protein, large p2, Mrpl38 - mitochondrial ribosomal protein l38, Rpl37 - ribosomal protein l37, Rpl23 - ribosomal protein l23, Mrpl48 - mitochondrial ribosomal protein l…
GO:0043231	intracellular membrane-bounded organelle	0.000175	0.00623	1.11	7083	3837	761	459	[Thrap3 - thyroid hormone receptor associated protein 3, Ddx5 - dead (asp-glu-ala-asp) box polypeptide 5, Acp1 - acid phosphatase 1, soluble, Cmpk1 - cytidine monophosphate (ump-cmp) kinase 1, Eftud2 - elongation factor tu gtp binding domain containing 2, Nmt2 - n-myristoyltransferase 2, Cpe - carboxypeptidase e, Add1 - adducin 1 (alpha), Fmnl1 - formin-like 1, Gnpat - glyceronephosphate o-acyltr…
GO:0043227	membrane-bounded organelle	0.000195	0.00675	1.11	7083	3850	761	460	[Thrap3 - thyroid hormone receptor associated protein 3, Ddx5 - dead (asp-glu-ala-asp) box polypeptide 5, Acp1 - acid phosphatase 1, soluble, Cmpk1 - cytidine monophosphate (ump-cmp) kinase 1, Eftud2 - elongation factor tu gtp binding domain containing 2, Nmt2 - n-myristoyltransferase 2, Cpe - carboxypeptidase e, Add1 - adducin 1 (alpha), Fmnl1 - formin-like 1, Gnpat - glyceronephosphate o-acyltr…
GO:0030426	growth cone	0.000317	0.0106	2.27	7083	82	761	20	[Tpm3 - tropomyosin 3, gamma, Ndrg2 - n-myc downstream regulated gene 2, Stmn3 - stathmin-like 3, Myh10 - myosin, heavy chain 10, non-muscle, Tsc2 - tuberous sclerosis 2, Sncb - synuclein, beta, Calm2 - calmodulin 2, Als2 - amyotrophic lateral sclerosis 2 (juvenile) homolog (human), Nefl - neurofilament, light polypeptide, Shank2 - sh3 and multiple ankyrin repeat domains 2, Cdk5 - cyclin-dependen…
GO:0030529	ribonucleoprotein complex	0.000349	0.0113	1.5	7083	423	761	68	[Ddx5 - dead (asp-glu-ala-asp) box polypeptide 5, Canx - calnexin, Mrps36 - mitochondrial ribosomal protein s36, Eftud2 - elongation factor tu gtp binding domain containing 2, Uba52 - ubiquitin a-52 residue ribosomal protein fusion product 1, Mrps21 - mitochondrial ribosomal protein s21, Rps16 - ribosomal protein s16, Rpl23a - ribosomal protein l23a, Rplp1 - ribosomal protein, large, p1, Rplp2 - …
GO:0031982	vesicle	0.000374	0.0118	1.49	7083	424	761	68	[Ctsb - cathepsin b, Canx - calnexin, Ncstn - nicastrin, Fam3c - family with sequence similarity 3, member c, Syp - synaptophysin, Chp - calcium binding protein p22, Ywhab - tyrosine 3-monooxygenase/tryptophan 5-monooxygenase activation protein, beta polypeptide, Cpe - carboxypeptidase e, Fmnl1 - formin-like 1, Syt7 - synaptotagmin vii, Sod1 - superoxide dismutase 1, soluble, Syt11 - synaptotagmi…
GO:0030427	site of polarized growth	0.000376	0.0115	2.24	7083	83	761	20	[Tpm3 - tropomyosin 3, gamma, Ndrg2 - n-myc downstream regulated gene 2, Stmn3 - stathmin-like 3, Myh10 - myosin, heavy chain 10, non-muscle, Tsc2 - tuberous sclerosis 2, Sncb - synuclein, beta, Calm2 - calmodulin 2, Als2 - amyotrophic lateral sclerosis 2 (juvenile) homolog (human), Nefl - neurofilament, light polypeptide, Shank2 - sh3 and multiple ankyrin repeat domains 2, Cdk5 - cyclin-dependen…
GO:0043005	neuron projection	0.000378	0.0113	1.47	7083	455	761	72	[Canx - calnexin, Syp - synaptophysin, Abat - 4-aminobutyrate aminotransferase, Acp1 - acid phosphatase 1, soluble, Gad1 - glutamate decarboxylase 1, Plcb4 - phospholipase c, beta 4, Pik3r1 - phosphoinositide-3-kinase, regulatory subunit 1 (alpha), Gsto1 - glutathione s-transferase omega 1, Calm2 - calmodulin 2, Mtpn - myotrophin, Kif5a - kinesin family member 5a, Cpe - carboxypeptidase e, Add1 -…
GO:0016020	membrane	0.00067	0.0195	1.18	7083	1969	761	250	[Cox5a - cytochrome c oxidase, subunit va, Ncstn - nicastrin, Pex19 - peroxisomal biogenesis factor 19, Timm13 - translocase of inner mitochondrial membrane 13 homolog (yeast), Atp5h - atp synthase, h+ transporting, mitochondrial fo complex, subunit d, Nmt2 - n-myristoyltransferase 2, Cpe - carboxypeptidase e, Slc39a7 - solute carrier family 39 (zinc transporter), member 7, Fmnl1 - formin-like 1,…
GO:0031974	membrane-enclosed lumen	0.000825	0.0234	1.81	7083	154	761	30	[Ndufa8 - nadh dehydrogenase (ubiquinone) 1 alpha subcomplex, 8, Ndufa10 - nadh dehydrogenase (ubiquinone) 1 alpha subcomplex 10, Ndufb7 - nadh dehydrogenase (ubiquinone) 1 beta subcomplex, 7, Dnajb11 - dnaj (hsp40) homolog, subfamily b, member 11, Abat - 4-aminobutyrate aminotransferase, Bloc1s1 - biogenesis of lysosomal organelles complex-1, subunit 1, Calu - calumenin, Os9 - osteosarcoma ampli…

## Sheet: legend
The text below is quoted directly from the GOrilla website, http://cbl-gorilla.cs.technion.ac.il
Enrichment (N, B, n, b) is defined as follows:
N - is the total number of genes
B - is the total number of genes associated with a specific GO term
n - is the number of genes in the top of the user's input list or in the target set when appropriate
b - is the number of genes in the intersection
Enrichment = (b/n) / (B/N)
