# Supplementary material for: Digital expression profiling of the compartmentalized translatome of Purkinje neurons
Source: HighWire-hosted journal article supplement (doi:10.1101/gr.164095.113), 2014-06-05
Supplement: Supplemental_Table.S8.xlsx [file Supplemental_Table.S8.xlsx]

## Sheet: Table S8
Antibody	Gene Symbol	manuf.	Cat #
Calbindin d28k	(PC marker)	Swant	#300
Emerin	Emd	Santa-Cruz	sc-15378
Gad65	Gad2	Millipore	ab5082
Vglut1	Slc17a7	abcam	ab72311
Vamp1-2	Vamp2	Santa-Cruz	sc13992
Grip1	Grip1	Millipore	ab5547
VDCC Beta3	Cacnb3	Alomone lab	acc008
Delta2 R	Grid2	Millipore	ab2285
Homer1b1c	Homer1b	abcam	ab97593
Map2	Map2	Millipore	ab5622
IP3R1	Itpr1	abcam	ab5804
Pax2	Pax2	zymed	71-6000
Bax	Bax	BD Pharmingen	#55410
Gap43	Gap43	Millipore	ab5220
Bcl2	Bcl2	BD Pharmingen	#55408
rab3a	rab3a	abcam	ab3335
