# Supplementary material for: Digital expression profiling of the compartmentalized translatome of Purkinje neurons
Source: HighWire-hosted journal article supplement (doi:10.1101/gr.164095.113), 2014-06-05
Supplement: Supplemental_Table_References.docx [file Supplemental_Table_References.docx]

# Supplemental Tables

## Table S1: Summary of the libraries produced for this study

Name: unique identifier for the library. Lane: identifier indicating which libraries were multiplexed together. Barcode: sequence identifier used for the multiplexing. Compartment: M, rER-bound; C, cytoplasmic. Capture: Bound, immunoprecipitated; Unbound, control supernatant. Cellular fraction: whole or dendrite (dissected molecular layer). Replicate: identifier indicating pools of lobules (from multiple animals). Lobules: number of lobules in the pool. RNA: number of nanograms of total RNA extracted. RIN: RNA Integrity Number. Extracted pairs: number of pairs identified by the sequence barcode for this library. Artifacts removed: number of pairs removed because they resembled empty constructs or oligonucleotide artifacts. Ribosome map count: number of pairs removed because they had significant homology with rRNA sequences. Reads aligned: number of pairs aligned to the rat genome. Proper pairs: number of pairs marked as “proper” by the BWA aligner. Unique pairs: number of pairs after collapsing all the pairs having the same external coordinates. 5' UTR exon, coding exon, intron, 3’UTR exon: number of CAGE 5’ ends contained in these four areas defined by the UCSC genome browser (Kent et al. 2002). Intergenic: remaining pairs. Median insert size: median distance between the extremities of the pairs (on the genome).

## Table S2: Clusters enriched by pulldown

List of 1,809 clusters enriched by pulldown, together with detected fold-change, normalized expression, and associated gene symbol.

## Table S3: Expression and statistical analysis

48,049 clusters together with results from the differential expression experiments (counts-per-million, false discovery rate, rank) for the comparison of captured vs non-captured as well as rER-bound vs cyoplasmic; annotations including gene symbol, biotype and description; information about the presence of the respective gene in the datasets published in (Sato et al. 2008, Doyle et al. 2008, Kirsch et al. 2012, Cajigas et al. 2012), and several rankings which make the data more accessible. A detailed description of each field can be found on the second worksheet (named “legend”).

## Table S4: Clusters unique or common to previously published research by others

Gene symbols contained in the seven sets of the Venn diagram in Fig. 4B.

## Table S5: Gene Ontology analysis of the differential expression between the subcellular compartments

9,372 rER-specific, Purkinje-enriched genes have been compared to the remaining 38,580 clusters using GOrilla (Eden et al. 2009). The resulting lists of statistically enriched Gene Ontology terms have then been used as input to REVIGO (Supek et al. 2011) to summarize the GO domains as treemaps, shown in Fig. S5C, S6 and S8. This table contains the lists of statistically enriched terms identified by the differential expression test, separated into three sheets for Molecular Function, Biological Process and Cellular Component.

## Table S6: Clusters comprising the biophysical translatome

This table shows the clusters involved in PC membrane potential control and ion homeostasis. A detailed description of each field can be found on the second worksheet (named “legend”).

## Table S7: Gene Ontology analysis of the dendritic clusters

Overrepresentation (determined with GOrilla (Eden et al. 2009)) of Gene Ontology terms of the 974 dendritic clusters, when compared to the remaining 47,075 clusters, separated into three sheets for Molecular Function, Biological Process and Cellular Component.

## Table S8: Antibodies

Table describing the antibodies used for the immuno-histofluorescence quantification, the gene encoding the protein which is targeted by the respective antibody (as shown in Fig. 4 C), manufacturer and catalogue number.
